# Supplementary material for: Bacterial Magnetosomes Release Iron Ions and Induce Regulation of Iron Homeostasis in Endothelial Cells
Source: MDPI journal article supplement (doi:10.3390/nano12223995), 2022-11-13
Supplement: s1 [file s1]

Table S1. All identified proteins from isolated MAG analyzed by LC-MS/MS.

| Protein IDs  | Unique peptides | Unique sequence coverage [%] | Mol. weight [kDa] | Relative abundance (%) | iBAQ 1  | iBAQ 2  | iBAQ 3  | MS/MS Count | Gene name     | Protein description                                                                                                         |
|--------------|-----------------|------------------------------|-------------------|------------------------|---------|---------|---------|-------------|---------------|-----------------------------------------------------------------------------------------------------------------------------|
| V6F534_9PROT | 13              | 68.8                         | 12.39             | 18.96                  | 1.3E+10 | 1.7E+10 | 1.5E+10 | 714         | mamC          | Magnetosome protein MamC                                                                                                    |
| V6F5K9_9PROT | 18              | 79.9                         | 14.83             | 12.37                  | 9.0E+09 | 1.0E+10 | 1.1E+10 | 1404        | mms6          | Magnetosome protein mms6                                                                                                    |
| V6EVY5_9PROT | 21              | 93.5                         | 10.48             | 7.41                   | 6.1E+09 | 5.6E+09 | 6.2E+09 | 143         | rpsS          | 30S ribosomal protein S19                                                                                                   |
| V6F244_9PROT | 17              | 66.4                         | 18.72             | 6.65                   | 6.0E+09 | 5.1E+09 | 5.0E+09 | 80          | mms5          | Putative Magnetosome protein MamD-like                                                                                      |
| V6EZM6_9PROT | 13              | 92.7                         | 6.32              | 5.06                   | 4.1E+09 | 3.6E+09 | 4.5E+09 | 80          | rpmG          | 50S ribosomal protein L33                                                                                                   |
| V6F2D1_9PROT | 15              | 45.9                         | 30.23             | 3.41                   | 2.6E+09 | 2.8E+09 | 2.9E+09 | 158         | mamD          | Magnetosome protein MamD                                                                                                    |
| V6F2K4_9PROT | 4               | 13.3                         | 16.81             | 3.36                   | 2.7E+09 | 2.8E+09 | 2.6E+09 | 13          | MGMSRv2__1301 | Uncharacterized protein                                                                                                     |
| V6F2H3_9PROT | 14              | 41.9                         | 28.36             | 2.64                   | 2.2E+09 | 2.3E+09 | 1.8E+09 | 109         | mamP          | Magnetosome protein MamP, containing PDZ-like domain                                                                        |
| V6F2B6_9PROT | 32              | 37.8                         | 78.04             | 2.29                   | 1.9E+09 | 1.8E+09 | 1.8E+09 | 422         | mamE          | Magnetosome protein MamE, containing Serine/cysteine peptidase, trypsin-like domain and HrtA/DegP2/Q/S Peptidase S1C domain |
| V6EZS4_9PROT | 10              | 80.6                         | 8.20              | 1.92                   | 1.5E+09 | 1.7E+09 | 1.5E+09 | 36          | rpsU          | 30S ribosomal protein S21                                                                                                   |
| V6F2I4_9PROT | 37              | 82.4                         | 23.52             | 1.91                   | 1.6E+09 | 1.5E+09 | 1.5E+09 | 152         | rpsD          | 30S ribosomal protein S4                                                                                                    |
| V6EZ16_9PROT | 16              | 71.3                         | 11.53             | 1.89                   | 1.5E+09 | 1.5E+09 | 1.6E+09 | 80          | rpsN          | 30S ribosomal protein S14                                                                                                   |
| V6EYF9_9PROT | 16              | 78                           | 13.94             | 1.27                   | 1.1E+09 | 9.9E+08 | 1.0E+09 | 64          | rpsL          | 30S ribosomal protein S12                                                                                                   |
| V6EZ21_9PROT | 10              | 80.3                         | 6.91              | 1.26                   | 1.1E+09 | 1.0E+09 | 9.6E+08 | 39          | rpmD          | 50S ribosomal protein L30                                                                                                   |
| V6F0N0_9PROT | 12              | 60                           | 17.09             | 1.13                   | 1.1E+09 | 8.7E+08 | 7.5E+08 | 49          | rpsI          | 30S ribosomal protein S9                                                                                                    |
| V6EVK2_9PROT | 14              | 73.7                         | 15.43             | 1.08                   | 9.0E+08 | 8.9E+08 | 8.4E+08 | 67          | rplP          | 50S ribosomal protein L16                                                                                                   |
| V6F2C2_9PROT | 2               | 7.1                          | 28.22             | 1.06                   | 9.3E+08 | 7.8E+08 | 8.6E+08 | 10          | mamX          | Magnetosome protein MamX                                                                                                    |
| V6F1K4_9PROT | 6               | 32.5                         | 14.08             | 1.03                   | 8.7E+08 | 8.8E+08 | 7.5E+08 | 16          | MGMSRv2__2190 | Uncharacterized protein                                                                                                     |
| V6EVN2_9PROT | 24              | 88.5                         | 17.75             | 1.03                   | 8.2E+08 | 8.3E+08 | 8.6E+08 | 97          | rpsG          | 30S ribosomal protein S7                                                                                                    |
| V6F510_9PROT | 10              | 19.5                         | 31.94             | 0.88                   | 7.5E+08 | 7.1E+08 | 6.7E+08 | 73          | mamB          | Magnetosome protein MamB, Cation efflux protein                                                                             |
| V6F2Z8_9PROT | 10              | 36.4                         | 19.98             | 0.86                   | 7.3E+08 | 6.8E+08 | 6.9E+08 | 51          | MGMSRv2__1633 | Uncharacterized protein                                                                                                     |
| V6F2J8_9PROT | 17              | 77.8                         | 10.23             | 0.80                   | 6.9E+08 | 6.0E+08 | 6.4E+08 | 60          | rpsR          | 30S ribosomal protein S18                                                                                                   |
| V6F631_9PROT | 14              | 60.2                         | 13.55             | 0.74                   | 5.7E+08 | 6.4E+08 | 6.0E+08 | 49          | rplT          | 50S ribosomal protein L20                                                                                                   |
| V6EVQ3_9PROT | 37              | 86                           | 25.52             | 0.67                   | 5.2E+08 | 5.6E+08 | 5.4E+08 | 142         | rpsC          | 30S ribosomal protein S3                                                                                                    |
| V6F8E8_9PROT | 10              | 69.1                         | 7.54              | 0.67                   | 6.1E+08 | 5.1E+08 | 5.0E+08 | 35          | rpml          | 50S ribosomal protein L35                                                                                                   |

| Protein IDs  | Unique peptides | Unique sequence coverage [%] | Mol. weight [kDa] | Relative abundance (%) | iBAQ 1  | iBAQ 2  | iBAQ 3  | MS/MS Count | Gene name     | Protein description                                        |
|--------------|-----------------|------------------------------|-------------------|------------------------|---------|---------|---------|-------------|---------------|------------------------------------------------------------|
| V6F515_9PROT | 10              | 19.8                         | 65.38             | 0.64                   | 4.7E+08 | 5.5E+08 | 5.2E+08 | 86          | mamO          | Probable membrane transporter protein                      |
| V6F401_9PROT | 11              | 75                           | 9.50              | 0.63                   | 5.5E+08 | 3.7E+08 | 6.0E+08 | 43          | hupB          | HU, DNA-binding transcriptional regulator, beta subunit    |
| V6F2G8_9PROT | 6               | 28.9                         | 18.71             | 0.61                   | 6.2E+08 | 5.0E+08 | 3.7E+08 | 53          | mamS          | Magnetosome protein MamS                                   |
| V6F519_9PROT | 16              | 29.8                         | 48.52             | 0.59                   | 3.8E+08 | 4.4E+08 | 6.1E+08 | 69          | mamJ          | MamJ protein                                               |
| V6F1F6_9PROT | 37              | 55                           | 39.11             | 0.58                   | 4.9E+08 | 4.6E+08 | 4.5E+08 | 141         | MGMSRv2__0921 | Putative RND efflux membrane fusion protein                |
| V6F3U0_9PROT | 20              | 88.2                         | 16.87             | 0.58                   | 4.9E+08 | 4.7E+08 | 4.4E+08 | 89          | rplM          | 50S ribosomal protein L13                                  |
| V6EYI8_9PROT | 16              | 66.7                         | 19.37             | 0.54                   | 4.6E+08 | 4.3E+08 | 4.2E+08 | 64          | rplF          | 50S ribosomal protein L6                                   |
| V6F1M7_9PROT | 35              | 87.9                         | 37.23             | 0.53                   | 4.1E+08 | 4.3E+08 | 4.3E+08 | 126         | MGMSRv2__1178 | Putative Multidrug resistance protein mdtA                 |
| V6EW00_9PROT | 15              | 74.4                         | 9.22              | 0.53                   | 4.5E+08 | 4.3E+08 | 3.9E+08 | 81          | rpsQ          | 30S ribosomal protein S17                                  |
| V6F5T4_9PROT | 8               | 64.9                         | 10.94             | 0.49                   | 3.8E+08 | 3.9E+08 | 4.1E+08 | 34          | rpsO          | 30S ribosomal protein S15                                  |
| V6F8G3_9PROT | 12              | 68.5                         | 13.59             | 0.45                   | 3.8E+08 | 3.5E+08 | 3.5E+08 | 49          | rpsP          | 30S ribosomal protein S16                                  |
| V6EYZ5_9PROT | 7               | 56.5                         | 7.71              | 0.43                   | 3.7E+08 | 3.2E+08 | 3.4E+08 | 17          | rpmC          | 50S ribosomal protein L29                                  |
| V6EVR6_9PROT | 19              | 90.6                         | 11.29             | 0.42                   | 3.7E+08 | 3.1E+08 | 3.3E+08 | 70          | rplX          | 50S ribosomal protein L24                                  |
| V6F235_9PROT | 10              | 24.8                         | 34.49             | 0.40                   | 3.0E+08 | 3.5E+08 | 3.3E+08 | 81          | mamM          | Magnetosome protein MamM, containing Cation efflux protein |
| V6EYJ6_9PROT | 15              | 64.7                         | 15.37             | 0.40                   | 3.3E+08 | 3.2E+08 | 3.2E+08 | 57          | rplQ          | 50S ribosomal protein L17                                  |
| V6EZ38_9PROT | 24              | 46.2                         | 28.32             | 0.39                   | 3.4E+08 | 3.0E+08 | 3.1E+08 | 94          | rpsB          | 30S ribosomal protein S2                                   |
| V6F989_9PROT | 11              | 62.2                         | 9.72              | 0.36                   | 3.3E+08 | 2.7E+08 | 2.7E+08 | 37          | rpsT          | 30S ribosomal protein S20                                  |
| V6F5I9_9PROT | 12              | 35.6                         | 18.88             | 0.35                   | 3.0E+08 | 2.5E+08 | 2.9E+08 | 51          | mamT          | MamT protein                                               |
| V6EVX0_9PROT | 13              | 66.7                         | 17.69             | 0.34                   | 2.5E+08 | 2.7E+08 | 3.0E+08 | 40          | rplJ          | 50S ribosomal protein L10                                  |
| V6F742_9PROT | 12              | 82.6                         | 11.60             | 0.33                   | 2.8E+08 | 2.8E+08 | 2.4E+08 | 40          | MGMSRv2__3982 | Uncharacterized protein                                    |
| V6EW21_9PROT | 14              | 69.7                         | 14.35             | 0.32                   | 2.6E+08 | 2.6E+08 | 2.6E+08 | 42          | rpsH          | 30S ribosomal protein S8                                   |
| V6EVL2_9PROT | 23              | 84                           | 14.08             | 0.32                   | 2.8E+08 | 2.5E+08 | 2.5E+08 | 88          | rpsM          | 30S ribosomal protein S13                                  |
| V6F8M8_9PROT | 23              | 79.9                         | 19.18             | 0.32                   | 2.5E+08 | 2.6E+08 | 2.6E+08 | 72          | atpH          | ATP synthase subunit delta                                 |
| V6EVS7_9PROT | 14              | 77.5                         | 12.84             | 0.31                   | 2.4E+08 | 2.5E+08 | 2.5E+08 | 45          | rplR          | 50S ribosomal protein L18                                  |
| V6EW25_9PROT | 8               | 50.9                         | 16.21             | 0.29                   | 2.7E+08 | 2.0E+08 | 2.3E+08 | 26          | rplO          | 50S ribosomal protein L15                                  |
| V6F5J2_9PROT | 24              | 84.8                         | 24.01             | 0.26                   | 2.1E+08 | 2.1E+08 | 2.1E+08 | 67          | mamA          | Magnetosome protein MamA                                   |

| Protein IDs  | Unique peptides | Unique sequence coverage [%] | Mol. weight [kDa] | Relative abundance (%) | iBAQ 1  | iBAQ 2  | iBAQ 3  | MS/MS Count | Gene name     | Protein description                                                                                    |
|--------------|-----------------|------------------------------|-------------------|------------------------|---------|---------|---------|-------------|---------------|--------------------------------------------------------------------------------------------------------|
| V6EY28_9PROT | 7               | 77.6                         | 13.02             | 0.26                   | 2.1E+08 | 2.1E+08 | 2.1E+08 | 23          | MGMSRv2__0832 | Putative NADH dehydrogenase [ubiquinone] 1 alpha subcomplex subunit 12                                 |
| V6F0E4_9PROT | 9               | 64                           | 9.58              | 0.26                   | 2.2E+08 | 2.2E+08 | 1.8E+08 | 23          | rpmA          | 50S ribosomal protein L27                                                                              |
| V6F797_9PROT | 6               | 32.1                         | 15.44             | 0.24                   | 1.8E+08 | 2.1E+08 | 1.9E+08 | 27          | mucR          | Transcriptional regulatory protein mucR                                                                |
| V6EYH2_9PROT | 10              | 73.4                         | 14.24             | 0.23                   | 2.0E+08 | 1.9E+08 | 1.8E+08 | 41          | rplV          | 50S ribosomal protein L22                                                                              |
| V6EVL0_9PROT | 27              | 73.4                         | 22.51             | 0.22                   | 1.9E+08 | 1.8E+08 | 1.8E+08 | 94          | rpsE          | 30S ribosomal protein S5                                                                               |
| V6EVK6_9PROT | 22              | 80.6                         | 20.82             | 0.20                   | 1.5E+08 | 1.5E+08 | 1.8E+08 | 66          | rplE          | 50S ribosomal protein L5                                                                               |
| V6F254_9PROT | 3               | 27                           | 12.34             | 0.20                   | 1.6E+08 | 1.7E+08 | 1.5E+08 | 20          | mamF          | Magnetosome protein MamF                                                                               |
| V6F1J6_9PROT | 7               | 75                           | 9.49              | 0.20                   | 1.7E+08 | 1.5E+08 | 1.5E+08 | 34          | hfq           | RNA-binding protein Hfq                                                                                |
| V6F6K6_9PROT | 6               | 33.3                         | 10.15             | 0.19                   | 1.4E+08 | 1.5E+08 | 1.6E+08 | 22          | MGMSRv2__3864 | Uncharacterized protein                                                                                |
| V6F389_9PROT | 9               | 71                           | 10.87             | 0.17                   | 1.2E+08 | 1.4E+08 | 1.5E+08 | 22          | rpmB          | 50S ribosomal protein L28                                                                              |
| V6EYI4_9PROT | 10              | 70.5                         | 13.31             | 0.16                   | 1.4E+08 | 1.3E+08 | 1.3E+08 | 30          | rplN          | 50S ribosomal protein L14                                                                              |
| V6EYY3_9PROT | 28              | 78.2                         | 30.47             | 0.16                   | 1.3E+08 | 1.3E+08 | 1.3E+08 | 95          | rplB          | 50S ribosomal protein L2                                                                               |
| V6F0H0_9PROT | 19              | 82.8                         | 17.45             | 0.16                   | 1.4E+08 | 1.3E+08 | 1.2E+08 | 50          | omp           | Outer membrane lipoprotein omp16 homolog                                                               |
| V6EW10_9PROT | 11              | 61.5                         | 11.40             | 0.15                   | 1.2E+08 | 1.2E+08 | 1.3E+08 | 28          | MGMSRv2__0255 | Uncharacterized protein                                                                                |
| V6EYW3_9PROT | 18              | 62.3                         | 24.40             | 0.15                   | 1.3E+08 | 1.2E+08 | 1.2E+08 | 47          | rplA          | 50S ribosomal protein L1                                                                               |
| V6EZ26_9PROT | 10              | 42.3                         | 14.09             | 0.15                   | 1.3E+08 | 1.2E+08 | 1.1E+08 | 32          | rpsK          | 30S ribosomal protein S11                                                                              |
| V6EVN7_9PROT | 18              | 69.8                         | 21.91             | 0.15                   | 1.2E+08 | 1.1E+08 | 1.3E+08 | 49          | rplD          | 50S ribosomal protein L4                                                                               |
| V6F880_9PROT | 10              | 74.1                         | 12.44             | 0.15                   | 1.3E+08 | 1.2E+08 | 1.1E+08 | 27          | MGMSRv2__3518 | cAMP-binding protein-catabolite gene activator and regulatory subunit of cAMP-dependent protein kinase |
| V6F7P4_9PROT | 11              | 33.1                         | 31.36             | 0.14                   | 1.2E+08 | 1.2E+08 | 1.1E+08 | 48          | MGMSRv2__4162 | Putative Alpha/beta hydrolase fold                                                                     |
| V6F329_9PROT | 32              | 47.1                         | 46.31             | 0.13                   | 1.2E+08 | 1.1E+08 | 9.9E+07 | 122         | cfa           | Cyclopropane fatty acyl phospholipid synthase (Unsaturated-phospholipid methyltransferase)             |
| V6F226_9PROT | 6               | 62.2                         | 9.08              | 0.12                   | 1.0E+08 | 8.6E+07 | 9.2E+07 | 15          | hupB          | HU, DNA-binding transcriptional regulator, beta subunit                                                |

| Protein IDs  | Unique peptides | Unique sequence coverage [%] | Mol. weight [kDa] | Relative abundance (%) | iBAQ 1  | iBAQ 2  | iBAQ 3  | MS/MS Count | Gene name     | Protein description                                                   |
|--------------|-----------------|------------------------------|-------------------|------------------------|---------|---------|---------|-------------|---------------|-----------------------------------------------------------------------|
| V6F935_9PROT | 14              | 32                           | 33.69             | 0.11                   | 8.8E+07 | 8.7E+07 | 8.7E+07 | 40          | ompA          | Outer membrane protein A (3aII*Gd)                                    |
| V6F1E6_9PROT | 6               | 39.2                         | 8.29              | 0.11                   | 8.2E+07 | 8.4E+07 | 9.5E+07 | 11          | rpmE          | 50S ribosomal protein L31                                             |
| V6F5M3_9PROT | 9               | 40.6                         | 15.09             | 0.11                   | 8.1E+07 | 8.1E+07 | 9.5E+07 | 20          | mamW          | Magnetosome protein MamW                                              |
| V6F780_9PROT | 8               | 70                           | 12.50             | 0.10                   | 9.1E+07 | 8.0E+07 | 8.1E+07 | 23          | MGMSRv2__4155 | Cytochrome c2 iso-2                                                   |
| V6F7E5_9PROT | 10              | 48.6                         | 15.25             | 0.10                   | 1.3E+08 | 4.3E+07 | 7.0E+07 | 28          | ndk           | Nucleoside diphosphate kinase                                         |
| V6EYQ5_9PROT | 11              | 39.1                         | 17.29             | 0.10                   | 7.9E+07 | 8.0E+07 | 7.7E+07 | 32          | MGMSRv2__1175 | Putative transcriptional regulatory protein, Ros/MucR family          |
| V6EVY0_9PROT | 12              | 64.7                         | 11.71             | 0.10                   | 6.2E+07 | 8.3E+07 | 8.9E+07 | 30          | rpsJ          | 30S ribosomal protein S10                                             |
| V6F5E0_9PROT | 28              | 67.5                         | 35.29             | 0.09                   | 7.9E+07 | 7.7E+07 | 6.9E+07 | 79          | MGMSRv2__2306 | Uncharacterized protein                                               |
| V6EZU0_9PROT | 22              | 72.2                         | 32.98             | 0.09                   | 7.8E+07 | 7.0E+07 | 7.2E+07 | 57          | MGMSRv2__1462 | Protein HflC                                                          |
| V6EYJ0_9PROT | 18              | 38                           | 40.46             | 0.09                   | 7.3E+07 | 7.3E+07 | 7.2E+07 | 64          | MGMSRv2__1090 | Putative TRAP-type mannitol/chloroaromatic compound transport system  |
| V6EY16_9PROT | 15              | 71.1                         | 15.66             | 0.08                   | 7.2E+07 | 6.2E+07 | 6.2E+07 | 40          | MGMSRv2__0817 | LWamide neuropeptides                                                 |
| V6F493_9PROT | 11              | 61.9                         | 13.45             | 0.08                   | 7.1E+07 | 6.2E+07 | 6.1E+07 | 26          | yhbH          | Ribosome-associated, sigma 54 modulation protein                      |
| V6F6H9_9PROT | 5               | 45.3                         | 10.73             | 0.08                   | 6.7E+07 | 5.8E+07 | 6.0E+07 | 13          | ihfB          | Integration host factor subunit beta                                  |
| V6EYI6_9PROT | 3               | 42.3                         | 8.28              | 0.08                   | 5.3E+07 | 5.7E+07 | 7.2E+07 | 12          | tatA          | Sec-independent protein translocase protein TatA                      |
| V6F3B8_9PROT | 6               | 38                           | 21.55             | 0.07                   | 6.9E+07 | 5.8E+07 | 5.5E+07 | 22          | MGMSRv2__2667 | ABC-type polar amino acid transport system, ATPase component          |
| V6EYG6_9PROT | 15              | 57.1                         | 24.56             | 0.07                   | 5.6E+07 | 5.7E+07 | 6.1E+07 | 42          | rplC          | 50S ribosomal protein L3                                              |
| V6EZA2_9PROT | 9               | 39.5                         | 18.53             | 0.07                   | 7.0E+07 | 4.9E+07 | 5.6E+07 | 25          | nuoI          | NADH-quinone oxidoreductase subunit I                                 |
| V6F5X9_9PROT | 6               | 44.2                         | 14.40             | 0.07                   | 5.9E+07 | 5.4E+07 | 5.8E+07 | 20          | cheY          | Chemotaxis regulator transmitting signal to flagellar motor component |
| V6F6Z3_9PROT | 14              | 80.7                         | 16.36             | 0.07                   | 5.8E+07 | 5.0E+07 | 5.0E+07 | 31          | mms16         | Magnetic particle membrane specific GTPase P16                        |

| Protein IDs  | Unique peptides | Unique sequence coverage [%] | Mol. weight [kDa] | Relative abundance (%) | MS/MS   |         |         |       |               |                                                                                                   |
|--------------|-----------------|------------------------------|-------------------|------------------------|---------|---------|---------|-------|---------------|---------------------------------------------------------------------------------------------------|
|              |                 |                              |                   |                        | iBAQ 1  | iBAQ 2  | iBAQ 3  | Count | Gene name     | Protein description                                                                               |
| V6F8Q1_9PROT | 18              | 64.9                         | 36.29             | 0.06                   | 4.8E+07 | 5.4E+07 | 5.6E+07 | 54    | gyaR          | Glyoxylate reductase                                                                              |
| V6F6F6_9PROT | 19              | 55.6                         | 31.84             | 0.06                   | 5.2E+07 | 4.8E+07 | 5.0E+07 | 44    | atpG          | ATP synthase gamma chain                                                                          |
|              |                 |                              |                   |                        |         |         |         |       |               | Putative carboxymethylenebutenolidase                                                             |
| V6F627_9PROT | 11              | 40.1                         | 29.90             | 0.06                   | 4.7E+07 | 4.5E+07 | 5.4E+07 | 31    | ysgA          | (Dienelactone hydrolase DLH)                                                                      |
| V6EVI6_9PROT | 8               | 44.1                         | 10.99             | 0.06                   | 5.2E+07 | 4.8E+07 | 4.4E+07 | 20    | rplW          | 50S ribosomal protein L23                                                                         |
| V6F2K8_9PROT | 8               | 41.5                         | 21.67             | 0.06                   | 5.2E+07 | 5.1E+07 | 3.9E+07 | 26    | MGMSRv2__1306 | Uncharacterized protein                                                                           |
| V6F476_9PROT | 11              | 42.8                         | 19.67             | 0.06                   | 4.9E+07 | 4.6E+07 | 4.7E+07 | 36    | infC          | Translation initiation factor IF-3                                                                |
| V6EZW4_9PROT | 7               | 48.6                         | 16.40             | 0.05                   | 4.8E+07 | 4.1E+07 | 4.0E+07 | 20    | rpsF          | 30S ribosomal protein S6                                                                          |
| V6FOY5_9PROT | 9               | 34.2                         | 25.83             | 0.05                   | 4.7E+07 | 4.0E+07 | 4.0E+07 | 25    | phbB          | Acetoacetyl-coA reductase                                                                         |
| V6EZ95_9PROT | 9               | 38.8                         | 16.71             | 0.05                   | 4.1E+07 | 3.9E+07 | 3.6E+07 | 24    | MGMSRv2__1365 | Uncharacterized protein                                                                           |
|              |                 |                              |                   |                        |         |         |         |       |               | Succinyl-CoA:3-ketoacid-coenzyme A transferase subunit A (Succinyl CoA:3-oxoacid CoA-transferase) |
| V6EZD1_9PROT | 9               | 38.8                         | 26.18             | 0.05                   | 3.9E+07 | 3.9E+07 | 3.7E+07 | 32    | scoA          | (OXCT A)                                                                                          |
| V6F5H5_9PROT | 3               | 29.7                         | 10.63             | 0.05                   | 4.5E+07 | 3.4E+07 | 3.4E+07 | 7     | MGMSRv2__2346 | Uncharacterized protein                                                                           |
|              |                 |                              |                   |                        |         |         |         |       |               | Magnetosome protein MamR, containing Excisionase/Xis, DNA-binding domain                          |
| V6F2A7_9PROT | 5               | 61.9                         | 9.33              | 0.05                   | 4.2E+07 | 4.3E+07 | 2.8E+07 | 13    | mamR          |                                                                                                   |
| V6F1W7_9PROT | 3               | 20.7                         | 12.30             | 0.04                   | 3.4E+07 | 3.7E+07 | 3.8E+07 | 12    | MGMSRv2__2310 | Uncharacterized protein                                                                           |
| V6EVW5_9PROT | 16              | 40.7                         | 43.08             | 0.04                   | 3.6E+07 | 3.1E+07 | 3.3E+07 | 37    | tufB          | Elongation factor Tu                                                                              |
|              |                 |                              |                   |                        |         |         |         |       |               | DNA-binding transcriptional repressor                                                             |
| V6F289_9PROT | 6               | 37                           | 16.57             | 0.04                   | 3.8E+07 | 3.0E+07 | 3.3E+07 | 16    | iscR          |                                                                                                   |
| V6F7J2_9PROT | 4               | 26.4                         | 20.04             | 0.04                   | 3.1E+07 | 3.3E+07 | 3.5E+07 | 11    | ppa           | Inorganic pyrophosphatase                                                                         |
| V6F6N0_9PROT | 31              | 48.3                         | 54.64             | 0.04                   | 3.4E+07 | 3.1E+07 | 2.9E+07 | 79    | atpA          | ATP synthase subunit alpha                                                                        |
| V6EVH0_9PROT | 5               | 24.6                         | 15.00             | 0.04                   | 3.3E+07 | 3.1E+07 | 2.9E+07 | 17    | rplK          | 50S ribosomal protein L11                                                                         |
|              |                 |                              |                   |                        |         |         |         |       |               | Peptidoglycan-associated outer membrane lipoprotein                                               |
| V6EZ52_9PROT | 12              | 50.6                         | 18.70             | 0.04                   | 3.3E+07 | 2.7E+07 | 3.1E+07 | 37    | pal           | Putative HTH-type transcriptional regulator iscR                                                  |
| V6F6I3_9PROT | 9               | 46.4                         | 17.08             | 0.04                   | 3.5E+07 | 3.0E+07 | 2.6E+07 | 20    | MGMSRv2__2888 |                                                                                                   |
| V6F5R7_9PROT | 11              | 63.9                         | 17.17             | 0.04                   | 3.0E+07 | 2.9E+07 | 3.1E+07 | 29    | rplS          | 50S ribosomal protein L19                                                                         |
| V6F1K7_9PROT | 22              | 39.9                         | 49.14             | 0.04                   | 3.0E+07 | 2.9E+07 | 2.9E+07 | 51    | lpD           | Dihydrolipoyl dehydrogenase                                                                       |

| Protein IDs  | Unique peptides | Unique sequence coverage [%] | Mol. weight [kDa] | Relative abundance (%) | iBAQ 1  | iBAQ 2  | iBAQ 3  | MS/MS Count | Gene name     | Protein description                                                                               |
|--------------|-----------------|------------------------------|-------------------|------------------------|---------|---------|---------|-------------|---------------|---------------------------------------------------------------------------------------------------|
| V6EXV3_9PROT | 13              | 43.5                         | 28.37             | 0.04                   | 2.9E+07 | 3.3E+07 | 2.6E+07 | 31          | MGMSRv2__0880 | Putative thiol-disulfide oxidoreductase                                                           |
| V6F0D5_9PROT | 12              | 45.1                         | 23.84             | 0.04                   | 2.9E+07 | 2.5E+07 | 3.1E+07 | 25          | MGMSRv2__0541 | Uncharacterized protein                                                                           |
| V6F987_9PROT | 6               | 37.2                         | 18.42             | 0.03                   | 2.7E+07 | 2.7E+07 | 2.9E+07 | 16          | MGMSRv2__4251 | Putative Ferritin and Dps family,DNA protection during starvation protein                         |
| V6EWF3_9PROT | 7               | 38.2                         | 29.82             | 0.03                   | 3.1E+07 | 2.6E+07 | 2.5E+07 | 18          | MGMSRv2__0304 | Putative universal stress protein UspA                                                            |
| V6F6T8_9PROT | 11              | 56.5                         | 22.34             | 0.03                   | 2.5E+07 | 2.8E+07 | 2.7E+07 | 23          | MGMSRv2__3949 | Putative major cold shock protein                                                                 |
| V6F303_9PROT | 32              | 49.9                         | 57.69             | 0.03                   | 2.8E+07 | 2.6E+07 | 2.3E+07 | 82          | groL          | 60 kDa chaperonin                                                                                 |
| V6F8X1_9PROT | 12              | 25.2                         | 45.73             | 0.03                   | 4.1E+07 | 1.8E+07 | 1.8E+07 | 29          | icd           | Isocitrate dehydrogenase [NADP]                                                                   |
| V6EZ14_9PROT | 7               | 73.9                         | 12.12             | 0.03                   | 2.6E+07 | 2.6E+07 | 2.3E+07 | 19          | MGMSRv2__1290 | Putative phasin                                                                                   |
| V6F410_9PROT | 12              | 25.4                         | 50.96             | 0.03                   | 2.3E+07 | 2.6E+07 | 2.6E+07 | 40          | MGMSRv2__1811 | Putative amino acid dehydrogenase containing NAD(P)-binding domain and ferrodoxin-like domain     |
| V6F512_9PROT | 17              | 46.6                         | 36.53             | 0.03                   | 2.6E+07 | 2.4E+07 | 2.3E+07 | 36          | dctP          | TRAP-Type C4-dicarboxylate transport system, binding periplasmic protein (DctP subunit)           |
| V6F703_9PROT | 8               | 25                           | 31.69             | 0.03                   | 2.4E+07 | 1.9E+07 | 2.2E+07 | 22          | mmgB          | 3-hydroxybutyryl-CoA dehydrogenase (Beta-hydroxybutyryl-CoA dehydrogenase) (BHBD)                 |
| V6F1M2_9PROT | 16              | 40.9                         | 45.38             | 0.03                   | 2.2E+07 | 2.1E+07 | 2.0E+07 | 36          | glyA          | Serine hydroxymethyltransferase                                                                   |
| V6F630_9PROT | 11              | 23.8                         | 41.58             | 0.02                   | 1.9E+07 | 2.0E+07 | 2.0E+07 | 32          | sucB          | Dihydrolipoyllysine-residue succinyltransferase component of 2-oxoglutarate dehydrogenase complex |
| V6F885_9PROT | 12              | 30.7                         | 38.44             | 0.02                   | 2.0E+07 | 1.9E+07 | 1.9E+07 | 28          | gapA          | Glyceraldehyde-3-phosphate dehydrogenase                                                          |

| Protein IDs  | Unique peptides | Unique sequence coverage [%] | Mol. weight [kDa] | Relative abundance (%) | iBAQ 1  | iBAQ 2  | iBAQ 3  | MS/MS Count | Gene name     | Protein description                                                                           |
|--------------|-----------------|------------------------------|-------------------|------------------------|---------|---------|---------|-------------|---------------|-----------------------------------------------------------------------------------------------|
| V6F3J9_9PROT | 11              | 27.2                         | 40.38             | 0.02                   | 1.9E+07 | 1.9E+07 | 1.8E+07 | 26          | phbA          | Acetyl-CoA acetyltransferase containing thiolase domain (Acetoacetyl-CoA thiolase)            |
| V6EZY1_9PROT | 11              | 25.5                         | 44.01             | 0.02                   | 2.1E+07 | 1.8E+07 | 1.6E+07 | 22          | MGMSRv2__1575 | Uncharacterized protein                                                                       |
| V6EYF4_9PROT | 5               | 38.7                         | 12.79             | 0.02                   | 2.1E+07 | 1.6E+07 | 1.7E+07 | 9           | rpIL          | 50S ribosomal protein L7/L12                                                                  |
| V6F8R4_9PROT | 13              | 63.3                         | 25.36             | 0.02                   | 2.0E+07 | 1.9E+07 | 1.4E+07 | 28          | MGMSRv2__3968 | Uncharacterized protein                                                                       |
| V6EYH3_9PROT | 14              | 18.1                         | 47.30             | 0.02                   | 1.5E+07 | 2.4E+07 | 1.4E+07 | 36          | fixC          | FixC protein flavoprotein-ubiquinone oxidoreductase                                           |
| V6F5L5_9PROT | 15              | 42.9                         | 42.32             | 0.02                   | 1.7E+07 | 1.8E+07 | 1.7E+07 | 45          | pgk           | Phosphoglycerate kinase                                                                       |
| V6F384_9PROT | 5               | 36.8                         | 10.27             | 0.02                   | 1.9E+07 | 1.5E+07 | 1.8E+07 | 12          | groS          | 10 kDa chaperonin                                                                             |
| V6F3X0_9PROT | 5               | 52                           | 10.75             | 0.02                   | 1.7E+07 | 1.8E+07 | 1.6E+07 | 10          | rpIU          | 50S ribosomal protein L21                                                                     |
| V6F5K0_9PROT | 19              | 42.6                         | 49.02             | 0.02                   | 1.7E+07 | 1.6E+07 | 1.6E+07 | 51          | ffh           | Signal recognition particle protein                                                           |
| V6F2J4_9PROT | 14              | 31.9                         | 39.61             | 0.02                   | 1.8E+07 | 1.6E+07 | 1.5E+07 | 38          | MGMSRv2__1291 | Putative multidrug efflux system, subunit A                                                   |
| V6EXW5_9PROT | 7               | 50.3                         | 17.23             | 0.02                   | 1.7E+07 | 1.6E+07 | 1.6E+07 | 17          | MGMSRv2__0890 | Putative peroxiredoxin bcp                                                                    |
| V6F2M8_9PROT | 4               | 12.7                         | 29.29             | 0.02                   | 1.2E+07 | 1.7E+07 | 1.9E+07 | 10          | UspA          | Universal stress protein UspA                                                                 |
| V6F1H5_9PROT | 12              | 42.9                         | 28.79             | 0.02                   | 1.3E+07 | 1.8E+07 | 1.6E+07 | 19          | purC          | Phosphoribosylaminoimidazole-succinocarboxamide synthase                                      |
| V6F8I4_9PROT | 10              | 36.5                         | 33.41             | 0.02                   | 1.5E+07 | 1.5E+07 | 1.6E+07 | 19          | mdh           | Malate dehydrogenase                                                                          |
| V6F3N9_9PROT | 12              | 42                           | 34.82             | 0.02                   | 1.5E+07 | 1.5E+07 | 1.5E+07 | 30          | MGMSRv2__2797 | Putative alkanesulfonate transporter subunit periplasmic-binding component of ABC superfamily |
| V6EYD1_9PROT | 14              | 33.9                         | 38.23             | 0.02                   | 1.6E+07 | 1.4E+07 | 1.5E+07 | 33          | MGMSRv2__0989 | Polyphosphate kinase 2                                                                        |
| V6F0C8_9PROT | 9               | 25.8                         | 33.88             | 0.02                   | 1.4E+07 | 1.3E+07 | 1.4E+07 | 29          | accD          | Acetyl-coenzyme A carboxylase carboxyl transferase subunit beta                               |
| V6F5E6_9PROT | 14              | 31.4                         | 49.84             | 0.02                   | 1.4E+07 | 1.3E+07 | 1.4E+07 | 30          | MGMSRv2__3520 | Uncharacterized protein                                                                       |
| V6F4V1_9PROT | 11              | 52.3                         | 19.97             | 0.02                   | 1.3E+07 | 1.5E+07 | 1.2E+07 | 20          | MGMSRv2__3269 | Putative bacteriohemerythrin                                                                  |
| V6EX21_9PROT | 12              | 59.9                         | 23.86             | 0.02                   | 1.3E+07 | 1.3E+07 | 1.4E+07 | 26          | MGMSRv2__0529 | Uncharacterized protein                                                                       |
| V6EYZ7_9PROT | 5               | 30.8                         | 11.29             | 0.02                   | 1.4E+07 | 1.2E+07 | 1.3E+07 | 10          | ihfA          | Integration host factor subunit alpha                                                         |

| Protein IDs  | Unique peptides | Unique sequence coverage [%] | Mol. weight [kDa] | Relative abundance (%) | iBAQ 1  | iBAQ 2  | iBAQ 3  | MS/MS Count | Gene name     | Protein description                                           |
|--------------|-----------------|------------------------------|-------------------|------------------------|---------|---------|---------|-------------|---------------|---------------------------------------------------------------|
| V6EYM7_9PROT | 19              | 41                           | 49.66             | 0.02                   | 1.3E+07 | 1.4E+07 | 1.2E+07 | 38          | MGMSRv2__1074 | Putative outer membrane efflux protein                        |
| V6F5P4_9PROT | 14              | 33.9                         | 42.31             | 0.02                   | 1.4E+07 | 1.2E+07 | 1.2E+07 | 30          | sucC          | Succinate--CoA ligase [ADP-forming] subunit beta              |
| V6F770_9PROT | 10              | 27.7                         | 37.97             | 0.02                   | 1.2E+07 | 1.3E+07 | 1.3E+07 | 22          | cbbA          | Fructose-bisphosphate aldolase                                |
| V6F8S3_9PROT | 3               | 11.5                         | 27.52             | 0.02                   | 1.3E+07 | 1.3E+07 | 1.2E+07 | 8           | MGMSRv2__3846 | Uncharacterized protein                                       |
| V6EZA4_9PROT | 4               | 11.5                         | 52.20             | 0.02                   | 1.4E+07 | 1.3E+07 | 9.1E+06 | 15          | glnA          | Glutamine synthetase                                          |
| V6F637_9PROT | 5               | 24                           | 21.10             | 0.01                   | 1.3E+07 | 1.0E+07 | 1.1E+07 | 14          | ctc           | 50S ribosomal protein L25                                     |
| V6F7D1_9PROT | 15              | 23.2                         | 74.53             | 0.01                   | 1.2E+07 | 1.0E+07 | 1.1E+07 | 34          | rpoD          | RNA polymerase sigma factor RpoD                              |
| V6EY05_9PROT | 15              | 37.2                         | 35.98             | 0.01                   | 1.1E+07 | 1.0E+07 | 1.1E+07 | 34          | MGMSRv2__0925 | Putative Secretion protein HlyD                               |
| V6EZP5_9PROT | 12              | 24.1                         | 51.92             | 0.01                   | 1.3E+07 | 9.4E+06 | 1.0E+07 | 25          | degP          | Serine endoprotease (Protease Do), membrane-associated        |
| V6F2B4_9PROT | 12              | 42.5                         | 32.09             | 0.01                   | 1.3E+07 | 9.5E+06 | 1.0E+07 | 27          | tsf           | Elongation factor Ts                                          |
| V6EXV2_9PROT | 11              | 32.7                         | 34.28             | 0.01                   | 9.3E+06 | 1.2E+07 | 9.6E+06 | 24          | cbbP          | Phosphoribulokinase                                           |
| V6F4T6_9PROT | 5               | 55.9                         | 10.68             | 0.01                   | 8.7E+06 | 1.1E+07 | 1.1E+07 | 11          | MGMSRv2__3254 | Uncharacterized protein                                       |
| V6F8T9_9PROT | 8               | 23.6                         | 50.48             | 0.01                   | 1.6E+07 | 9.9E+06 | 4.8E+06 | 15          | atpD          | ATP synthase subunit beta                                     |
| V6F5W3_9PROT | 7               | 28.5                         | 29.68             | 0.01                   | 9.9E+06 | 1.0E+07 | 9.7E+06 | 11          | sucD          | Succinate--CoA ligase [ADP-forming] subunit alpha             |
| V6F6W1_9PROT | 9               | 28.8                         | 25.66             | 0.01                   | 9.9E+06 | 9.5E+06 | 9.5E+06 | 23          | ftsE          | Transporter subunit: ATP-binding component of ABC superfamily |
| V6F267_9PROT | 6               | 31.8                         | 18.94             | 0.01                   | 9.2E+06 | 1.0E+07 | 9.7E+06 | 11          | atpF          | ATP synthase subunit b                                        |
| V6F8Z9_9PROT | 9               | 29.5                         | 44.57             | 0.01                   | 9.8E+06 | 9.4E+06 | 9.2E+06 | 19          | hom           | Homoserine dehydrogenase                                      |
| V6EXY5_9PROT | 17              | 27.7                         | 49.94             | 0.01                   | 1.0E+07 | 8.2E+06 | 9.3E+06 | 39          | tolB          | Protein TolB                                                  |
| V6F691_9PROT | 9               | 23.3                         | 49.01             | 0.01                   | 9.6E+06 | 8.7E+06 | 9.5E+06 | 18          | MGMSRv2__3749 | Uncharacterized protein                                       |
| V6EYK1_9PROT | 6               | 13.1                         | 48.06             | 0.01                   | 9.7E+06 | 9.4E+06 | 8.4E+06 | 15          | proS          | Proline--tRNA ligase                                          |
| V6EZG2_9PROT | 8               | 47.6                         | 18.81             | 0.01                   | 9.4E+06 | 9.8E+06 | 8.2E+06 | 13          | MGMSRv2__0211 | Uncharacterized protein                                       |
| V6F1K3_9PROT | 8               | 27.9                         | 36.33             | 0.01                   | 8.3E+06 | 8.8E+06 | 9.0E+06 | 17          | pdhA          | Pyruvate dehydrogenase E1 component subunit alpha             |
| V6F0I5_9PROT | 9               | 41.8                         | 22.16             | 0.01                   | 9.4E+06 | 7.9E+06 | 8.5E+06 | 22          | MGMSRv2__0798 | Putative Glycerol metabolism activator                        |



| Protein IDs  | Unique peptides | Unique sequence coverage [%] | Mol. weight [kDa] | Relative abundance (%) | iBAQ 1  | iBAQ 2  | iBAQ 3  | MS/MS Count | Gene name     | Protein description                                           |
|--------------|-----------------|------------------------------|-------------------|------------------------|---------|---------|---------|-------------|---------------|---------------------------------------------------------------|
| V6F3Z2_9PROT | 7               | 21.1                         | 27.06             | 0.01                   | 8.9E+06 | 8.3E+06 | 8.0E+06 | 14          | MGMSRv2__3025 | Glycosyl transferase, group 2 family protein                  |
| V6F1R4_9PROT | 12              | 46.3                         | 25.66             | 0.01                   | 7.7E+06 | 8.7E+06 | 8.5E+06 | 15          | MGMSRv2__2255 | Putative Methyl-accepting chemotaxis sensory transducer       |
| V6EZB2_9PROT | 27              | 30.6                         | 88.41             | 0.01                   | 9.3E+06 | 7.5E+06 | 7.9E+06 | 49          | lon           | Lon protease                                                  |
| V6F5T3_9PROT | 6               | 25.1                         | 23.76             | 0.01                   | 8.8E+06 | 8.2E+06 | 7.5E+06 | 12          | agmR          | Glycerol metabolism activator                                 |
| V6F3S0_9PROT | 5               | 21.2                         | 19.45             | 0.01                   | 8.9E+06 | 7.7E+06 | 7.7E+06 | 13          | MGMSRv2__2827 | Ubiquinol-cytochrome c reductase iron-sulfur subunit          |
| V6F3W5_9PROT | 7               | 22.8                         | 22.45             | 0.01                   | 9.0E+06 | 7.5E+06 | 7.8E+06 | 16          | nadD          | Probable nicotinate-nucleotide adenyltransferase              |
| V6F985_9PROT | 9               | 36                           | 29.28             | 0.01                   | 8.4E+06 | 8.1E+06 | 7.7E+06 | 20          | fabI          | Enoyl-[acyl-carrier-protein] reductase [NADH]                 |
| V6EXU3_9PROT | 6               | 22.6                         | 34.61             | 0.01                   | 8.6E+06 | 7.7E+06 | 7.8E+06 | 12          | MGMSRv2__0804 | Putative Translation initiation factor IF-2                   |
| V6F7K6_9PROT | 4               | 31.1                         | 15.97             | 0.01                   | 8.4E+06 | 6.1E+06 | 7.3E+06 | 11          | MGMSRv2__4239 | Putative HTH-type transcriptional regulator CymR              |
| V6EYS0_9PROT | 6               | 22.6                         | 23.28             | 0.01                   | 7.4E+06 | 6.9E+06 | 7.3E+06 | 14          | pcm           | Protein-L-isoaspartate(D-aspartate) O-methyltransferase       |
| V6F1M3_9PROT | 4               | 49.6                         | 13.25             | 0.01                   | 8.5E+06 | 5.9E+06 | 7.2E+06 | 9           | cheY          | Chemotaxis protein cheY                                       |
| V6F5Y9_9PROT | 8               | 23.6                         | 40.06             | 0.01                   | 6.8E+06 | 7.6E+06 | 6.9E+06 | 12          | leuB          | 3-isopropylmalate dehydrogenase                               |
| V6F1V1_9PROT | 7               | 27.1                         | 27.28             | 0.01                   | 7.8E+06 | 6.3E+06 | 6.6E+06 | 13          | MGMSRv2__2142 | Putative amino acid transport protein, ATP-binding protein    |
| V6F4R4_9PROT | 10              | 24.5                         | 55.93             | 0.01                   | 6.4E+06 | 7.0E+06 | 7.2E+06 | 19          | yqjD          | Putative acyl-CoA carboxylase                                 |
| V6F8S9_9PROT | 14              | 27                           | 51.75             | 0.01                   | 7.1E+06 | 6.3E+06 | 7.1E+06 | 29          | pepA          | Probable cytosol aminopeptidase                               |
| V6F8K2_9PROT | 17              | 30                           | 61.47             | 0.01                   | 7.1E+06 | 6.7E+06 | 6.8E+06 | 35          | rpsA          | 30S ribosomal protein S1                                      |
| V6F6T3_9PROT | 6               | 23                           | 26.43             | 0.01                   | 7.6E+06 | 6.1E+06 | 6.5E+06 | 11          | etfB          | Electron transfer flavoprotein subunit beta                   |
| V6F110_9PROT | 8               | 23.8                         | 43.10             | 0.01                   | 7.4E+06 | 6.5E+06 | 6.2E+06 | 17          | pdhC          | Acetyltransferase component of pyruvate dehydrogenase complex |
| V6F459_9PROT | 5               | 9.6                          | 58.72             | 0.01                   | 7.7E+06 | 6.0E+06 | 6.3E+06 | 15          | MGMSRv2__3029 | Putative electron transfer flavoprotein dehydrogenases        |

| Protein IDs  | Unique peptides | Unique sequence coverage [%] | Mol. weight [kDa] | Relative abundance (%) | MS/MS   |         |         |       |               |                                                                                                                    |
|--------------|-----------------|------------------------------|-------------------|------------------------|---------|---------|---------|-------|---------------|--------------------------------------------------------------------------------------------------------------------|
|              |                 |                              |                   |                        | iBAQ 1  | iBAQ 2  | iBAQ 3  | Count | Gene name     | Protein description                                                                                                |
| V6F7K2_9PROT | 5               | 38.9                         | 11.52             | 0.01                   | 7.2E+06 | 6.4E+06 | 6.4E+06 | 11    | MGMSRv2__4117 | Anti-sigma factor antagonist                                                                                       |
| V6F883_9PROT | 17              | 37.6                         | 45.58             | 0.01                   | 7.0E+06 | 6.6E+06 | 6.2E+06 | 27    | argG          | Argininosuccinate synthase                                                                                         |
| V6F106_9PROT | 7               | 31.6                         | 30.02             | 0.01                   | 7.7E+06 | 5.7E+06 | 6.1E+06 | 14    | MGMSRv2__1857 | Putative ATPase MipZ                                                                                               |
| V6EZP7_9PROT | 8               | 25                           | 30.01             | 0.01                   | 7.4E+06 | 6.0E+06 | 6.0E+06 | 14    | MGMSRv2__1417 | Uncharacterized protein                                                                                            |
| V6F0D7_9PROT | 6               | 21.1                         | 22.68             | 0.01                   | 6.8E+06 | 6.1E+06 | 6.4E+06 | 7     | MGMSRv2__1709 | Uncharacterized protein                                                                                            |
| V6F6A5_9PROT | 7               | 25.3                         | 37.15             | 0.01                   | 6.2E+06 | 6.1E+06 | 6.2E+06 | 13    | rfaD          | ADP-L-glycero-D-manno-heptose-6-epimerase                                                                          |
| V6EWE4_9PROT | 5               | 35.8                         | 18.21             | 0.01                   | 8.6E+06 | 3.1E+06 | 6.7E+06 | 7     | MGMSRv2__0187 | UPF0234 protein MGMSRv2__0187                                                                                      |
| V6EVH5_9PROT | 34              | 22                           | 165.76            | 0.01                   | 6.3E+06 | 5.7E+06 | 6.0E+06 | 74    | rpoC          | DNA-directed RNA polymerase subunit beta                                                                           |
| V6EVK4_9PROT | 3               | 3.6                          | 88.64             | 0.01                   | 6.3E+06 | 6.0E+06 | 5.5E+06 | 7     | gyrB          | DNA gyrase subunit B                                                                                               |
| V6F2H8_9PROT | 5               | 16.1                         | 37.58             | 0.01                   | 6.6E+06 | 5.1E+06 | 6.0E+06 | 15    | mamK          | Magnetosome cytoskeleton protein MamK                                                                              |
| V6F8I3_9PROT | 7               | 16.9                         | 48.69             | 0.01                   | 4.9E+06 | 6.7E+06 | 6.0E+06 | 12    | lpd           | Dihydrolipoyl dehydrogenase                                                                                        |
| V6EY88_9PROT | 2               | 12.8                         | 19.15             | 0.01                   | 6.0E+06 | 5.8E+06 | 5.7E+06 | 6     | ppiB          | Peptidyl-prolyl cis-trans isomerase                                                                                |
| V6EW92_9PROT | 5               | 13.9                         | 38.82             | 0.01                   | 6.0E+06 | 5.5E+06 | 5.9E+06 | 11    | MGMSRv2__0132 | Putative UDP-glucose 4-epimerase                                                                                   |
| V6F8M7_9PROT | 7               | 14.1                         | 46.96             | 0.01                   | 5.1E+06 | 5.5E+06 | 5.2E+06 | 13    | rkpK          | UDP-glucose 6-dehydrogenase (UDP-Glc dehydrogenase) (UDP-GlcDH) (UDPGDH)                                           |
| V6F311_9PROT | 4               | 19.2                         | 11.31             | 0.01                   | 5.9E+06 | 4.8E+06 | 5.0E+06 | 9     | MGMSRv2__2705 | Uncharacterized protein                                                                                            |
| V6F8F0_9PROT | 7               | 21.7                         | 27.51             | 0.01                   | 6.3E+06 | 5.3E+06 | 4.2E+06 | 15    | MGMSRv2__3688 | Uncharacterized protein                                                                                            |
| V6F8Y3_9PROT | 4               | 18.7                         | 34.21             | 0.01                   | 5.4E+06 | 5.5E+06 | 4.7E+06 | 10    | MGMSRv2__4133 | Putative NADH-ubiquinone oxidoreductase 40 kDa subunit                                                             |
| V6F3Y4_9PROT | 9               | 42.8                         | 32.51             | 0.01                   | 5.3E+06 | 5.4E+06 | 4.9E+06 | 16    | cysK          | Pyridoxal-phosphate (PLP) dependent enzymes family subunit of cysteine synthase A (O-acetylserine sulfhydrylase A) |
| V6F016_9PROT | 7               | 15                           | 37.20             | 0.01                   | 3.4E+06 | 5.8E+06 | 5.8E+06 | 17    | ilvC          | Ketol-acid reductoisomerase (NADP(+))                                                                              |

| Protein IDs  | Unique peptides | Unique sequence coverage [%] | Mol. weight [kDa] | Relative abundance (%) | iBAQ 1  | iBAQ 2  | iBAQ 3  | MS/MS Count | Gene name     | Protein description                                                                                                 |
|--------------|-----------------|------------------------------|-------------------|------------------------|---------|---------|---------|-------------|---------------|---------------------------------------------------------------------------------------------------------------------|
| V6F5E7_9PROT | 5               | 29.6                         | 26.80             | 0.01                   | 4.6E+06 | 5.0E+06 | 5.3E+06 | 13          | MGMSRv2__3382 | Putative Chitoooligosaccharide deacetylase                                                                          |
| V6F0C3_9PROT | 9               | 22.8                         | 52.16             | 0.01                   | 5.1E+06 | 4.7E+06 | 4.8E+06 | 21          | der           | GTPase Der                                                                                                          |
| V6F1I6_9PROT | 6               | 15.6                         | 42.63             | 0.01                   | 4.7E+06 | 5.1E+06 | 4.6E+06 | 17          | MGMSRv2__1128 | Putative Serine-type D-Ala-D-Ala carboxypeptidase                                                                   |
| V6F5B6_9PROT | 5               | 26.8                         | 20.52             | 0.01                   | 4.7E+06 | 4.8E+06 | 4.8E+06 | 7           | MGMSRv2__2276 | Uncharacterized protein                                                                                             |
| V6F7F4_9PROT | 2               | 10.1                         | 16.20             | 0.01                   | 4.3E+06 | 4.8E+06 | 5.0E+06 | 7           | omp           | 17 kDa surface antigen                                                                                              |
| V6F859_9PROT | 10              | 26.1                         | 46.81             | 0.01                   | 4.6E+06 | 4.3E+06 | 4.7E+06 | 22          | rho           | Transcription termination factor Rho                                                                                |
| V6F6J4_9PROT | 11              | 15.7                         | 68.26             | 0.01                   | 4.4E+06 | 4.6E+06 | 4.7E+06 | 20          | dnaK          | Chaperone protein DnaK                                                                                              |
| V6F5Q1_9PROT | 9               | 25.4                         | 37.75             | 0.01                   | 4.8E+06 | 4.8E+06 | 4.0E+06 | 20          | MGMSRv2__3615 | Uncharacterized protein                                                                                             |
| V6F3J4_9PROT | 2               | 26                           | 11.21             | 0.01                   | 4.6E+06 | 5.0E+06 | 3.8E+06 | 6           | trxA          | Thioredoxin                                                                                                         |
| V6EVM7_9PROT | 26              | 19.4                         | 155.65            | 0.01                   | 4.6E+06 | 4.4E+06 | 4.4E+06 | 61          | rpoB          | DNA-directed RNA polymerase subunit beta                                                                            |
| V6F4L5_9PROT | 15              | 19.2                         | 92.58             | 0.01                   | 4.7E+06 | 4.8E+06 | 3.9E+06 | 29          | acnB          | Aconitate hydratase B                                                                                               |
| V6EZQ0_9PROT | 11              | 14.4                         | 74.20             | 0.01                   | 4.6E+06 | 5.0E+06 | 3.7E+06 | 25          | MGMSRv2__0483 | Putative serine protein kinase                                                                                      |
| V6EWF5_9PROT | 9               | 23.5                         | 29.69             | 0.01                   | 4.1E+06 | 4.7E+06 | 4.4E+06 | 15          | MGMSRv2__0202 | Putative high-affinity branched-chain amino acid ABC transporter, ATP-binding protein                               |
| V6F0J5_9PROT | 7               | 7.7                          | 67.17             | 0.01                   | 3.9E+06 | 4.2E+06 | 4.9E+06 | 14          | pckG          | Phosphoenolpyruvate carboxykinase [GTP]                                                                             |
| V6F8B9_9PROT | 17              | 19.8                         | 110.04            | 0.01                   | 3.8E+06 | 4.8E+06 | 4.4E+06 | 30          | sucA          | 2-oxoglutarate decarboxylase, component of the 2-oxoglutarate dehydrogenase complex, thiamin-binding                |
| V6EZM7_9PROT | 7               | 33.5                         | 20.46             | 0.01                   | 4.2E+06 | 4.9E+06 | 3.5E+06 | 9           | rpII          | 50S ribosomal protein L9                                                                                            |
| V6F626_9PROT | 2               | 14.4                         | 13.54             | 0.01                   | 4.8E+06 | 4.5E+06 | 3.2E+06 | 6           | clpS          | ATP-dependent Clp protease adapter protein ClpS                                                                     |
| V6F2T2_9PROT | 7               | 18.4                         | 38.41             | 0.01                   | 4.1E+06 | 3.9E+06 | 4.3E+06 | 14          | murG          | UDP-N-acetylglucosamine--N-acetylmuramyl-(pentapeptide) pyrophosphoryl-undecaprenol N-acetylglucosamine transferase |

| Protein IDs  | Unique peptides | Unique sequence coverage [%] | Mol. weight [kDa] | Relative abundance (%) | iBAQ 1  | iBAQ 2  | iBAQ 3  | MS/MS Count | Gene name     | Protein description                                           |
|--------------|-----------------|------------------------------|-------------------|------------------------|---------|---------|---------|-------------|---------------|---------------------------------------------------------------|
| V6F673_9PROT | 11              | 12.1                         | 94.56             | 0.01                   | 4.3E+06 | 3.7E+06 | 4.2E+06 | 21          | infB          | Translation initiation factor IF-2                            |
| V6F6V4_9PROT | 6               | 13                           | 54.76             | 0.01                   | 4.3E+06 | 4.1E+06 | 3.7E+06 | 10          | aldB          | Aldehyde dehydrogenase B                                      |
| V6F0A4_9PROT | 4               | 14.7                         | 33.60             | 0.00                   | 4.8E+06 | 3.7E+06 | 3.6E+06 | 9           | yedY          | Protein-methionine-sulfoxide reductase catalytic subunit MsrP |
| V6EWW8_9PROT | 3               | 18.1                         | 23.81             | 0.00                   | 3.4E+06 | 5.1E+06 | 3.5E+06 | 6           | MGMSRv2__0464 | Uncharacterized protein                                       |
| V6F678_9PROT | 12              | 18.7                         | 77.28             | 0.00                   | 4.2E+06 | 3.9E+06 | 3.9E+06 | 26          | pnp           | Polyribonucleotide nucleotidyltransferase                     |
| V6EYW0_9PROT | 7               | 22                           | 43.82             | 0.00                   | 3.7E+06 | 4.4E+06 | 3.9E+06 | 15          | MGMSRv2__0198 | Putative branched-chain amino acid ABC transporter            |
| V6F8Q3_9PROT | 5               | 25.1                         | 31.40             | 0.00                   | 4.5E+06 | 3.6E+06 | 3.5E+06 | 13          | etfA          | Electron transfer flavoprotein (Alpha subunit)                |
| V6F417_9PROT | 7               | 26.6                         | 32.85             | 0.00                   | 3.3E+06 | 3.5E+06 | 4.2E+06 | 13          | cheR          | Chemotaxis protein methyltransferase                          |
| V6EYK9_9PROT | 4               | 10.7                         | 46.51             | 0.00                   | 3.2E+06 | 3.7E+06 | 3.8E+06 | 12          | MGMSRv2__1120 | Putative O-acetylhomoserine/O-acetylserine sulphydrylase      |
| V6EZR8_9PROT | 4               | 20.4                         | 25.44             | 0.00                   | 3.2E+06 | 3.7E+06 | 3.7E+06 | 9           | fabG          | 3-oxoacyl-[acyl-carrier-protein] reductase                    |
| V6F907_9PROT | 5               | 13.8                         | 52.63             | 0.00                   | 4.1E+06 | 3.2E+06 | 3.4E+06 | 13          | MGMSRv2__4046 | Putative ATPase                                               |
| V6F1W4_9PROT | 3               | 24.2                         | 15.91             | 0.00                   | 4.0E+06 | 3.3E+06 | 3.3E+06 | 6           | MGMSRv2__2157 | Uncharacterized protein                                       |
| V6EX06_9PROT | 6               | 15                           | 36.68             | 0.00                   | 3.5E+06 | 3.6E+06 | 3.5E+06 | 14          | mreB          | Cell shape determining protein MreB/Mrl                       |
| V6EWZ2_9PROT | 5               | 14.5                         | 43.14             | 0.00                   | 3.4E+06 | 3.2E+06 | 3.4E+06 | 8           | MGMSRv2__0417 | Putative ABC transport protein, substrate-binding component   |
| V6F763_9PROT | 2               | 8.9                          | 31.55             | 0.00                   | 3.6E+06 | 3.1E+06 | 3.1E+06 | 7           | fixP          | Cbb3-type cytochrome c oxidase subunit                        |
| V6F036_9PROT | 7               | 31.5                         | 28.93             | 0.00                   | 4.3E+06 | 2.8E+06 | 2.7E+06 | 12          | MGMSRv2__1599 | Putative phosphate-binding protein pstS                       |
| V6F0Y4_9PROT | 7               | 15.3                         | 38.71             | 0.00                   | 3.6E+06 | 3.0E+06 | 3.0E+06 | 8           | livK          | Leucine transporter subunit                                   |
| V6F067_9PROT | 4               | 6.5                          | 59.09             | 0.00                   | 3.5E+06 | 3.0E+06 | 2.9E+06 | 10          | MGMSRv2__1557 | periplasmic-binding component of ABC superfamily              |
|              |                 |                              |                   |                        |         |         |         |             |               | Putative acyl-CoA synthetase                                  |

| Protein IDs  | Unique peptides | Unique sequence coverage [%] | Mol. weight [kDa] | Relative abundance (%) | iBAQ 1  | iBAQ 2  | iBAQ 3  | MS/MS Count | Gene name     | Protein description                                                |
|--------------|-----------------|------------------------------|-------------------|------------------------|---------|---------|---------|-------------|---------------|--------------------------------------------------------------------|
| V6F7D9_9PROT | 7               | 23.4                         | 38.41             | 0.00                   | 3.1E+06 | 2.8E+06 | 3.5E+06 | 9           | mmeA          | Magnetosome membrane associated protein MmeA                       |
| V6EZW3_9PROT | 8               | 21.6                         | 39.28             | 0.00                   | 3.2E+06 | 3.0E+06 | 3.0E+06 | 17          | pntA          | Pyridine nucleotide transhydrogenase, alpha subunit                |
| V6F477_9PROT | 8               | 26.8                         | 38.09             | 0.00                   | 2.9E+06 | 2.9E+06 | 3.2E+06 | 13          | recA          | Protein RecA                                                       |
| V6F5Q2_9PROT | 6               | 16.1                         | 48.33             | 0.00                   | 2.7E+06 | 2.9E+06 | 3.0E+06 | 12          | hslU          | ATP-dependent protease ATPase subunit HslU                         |
| V6F242_9PROT | 6               | 16                           | 48.60             | 0.00                   | 2.7E+06 | 2.7E+06 | 3.0E+06 | 15          | gltA          | Citrate synthase                                                   |
| V6EZE1_9PROT | 3               | 9.9                          | 43.04             | 0.00                   | 2.4E+06 | 2.8E+06 | 3.2E+06 | 8           | MGMSRv2__1410 | Uncharacterized protein                                            |
| V6F189_9PROT | 5               | 19.1                         | 25.24             | 0.00                   | 3.6E+06 | 2.2E+06 | 2.3E+06 | 9           | MGMSRv2__0846 | Transcriptional regulatory protein CusR                            |
| V6F4Y6_9PROT | 4               | 8.7                          | 48.74             | 0.00                   | 2.6E+06 | 2.7E+06 | 2.8E+06 | 10          | MGMSRv2__3222 | Putative intracellular PHB depolymerase                            |
| V6F5W4_9PROT | 4               | 24.6                         | 23.20             | 0.00                   | 2.6E+06 | 2.6E+06 | 2.4E+06 | 9           | yrbC          | Toluene transporter subunit: membrane component of ABC superfamily |
| V6F6Y9_9PROT | 9               | 16.6                         | 71.49             | 0.00                   | 2.6E+06 | 2.5E+06 | 2.2E+06 | 15          | acs           | Acetyl-coenzyme A synthetase                                       |
| V6F8X0_9PROT | 7               | 22.9                         | 40.17             | 0.00                   | 2.5E+06 | 2.3E+06 | 2.5E+06 | 12          | MGMSRv2__4093 | Uncharacterized protein                                            |
| V6F563_9PROT | 7               | 16.7                         | 64.52             | 0.00                   | 2.9E+06 | 2.1E+06 | 2.2E+06 | 12          | sdhA          | Succinate dehydrogenase flavoprotein subunit                       |
| V6F1V9_9PROT | 6               | 21.1                         | 38.94             | 0.00                   | 2.3E+06 | 2.6E+06 | 2.2E+06 | 11          | fbpC          | Sulfate/thiosulfate import ATP-binding protein CysA                |
| V6F3C0_9PROT | 4               | 8.6                          | 50.60             | 0.00                   | 2.4E+06 | 2.2E+06 | 2.4E+06 | 8           | ahcY          | Adenosylhomocysteinase                                             |
| V6F793_9PROT | 2               | 13.2                         | 15.57             | 0.00                   | 2.3E+06 | 2.3E+06 | 2.3E+06 | 6           | MGMSRv2__4099 | Cytochrome c                                                       |
| V6EXL6_9PROT | 8               | 9.5                          | 102.37            | 0.00                   | 1.9E+06 | 1.8E+06 | 2.9E+06 | 13          | rne           | Ribonuclease E                                                     |
| V6EYH7_9PROT | 5               | 16.8                         | 31.19             | 0.00                   | 2.1E+06 | 2.0E+06 | 2.3E+06 | 7           | MGMSRv2__1039 | Periplasmic protein TonB, links inner and outer membranes          |
| V6F708_9PROT | 5               | 9.2                          | 56.36             | 0.00                   | 1.8E+06 | 2.4E+06 | 2.1E+06 | 11          | ubiB          | Probable protein kinase UbiB                                       |
| V6F4Q8_9PROT | 4               | 12.6                         | 24.18             | 0.00                   | 2.8E+06 | 1.4E+06 | 1.9E+06 | 7           | MGMSRv2__2051 | Putative response regulator receiver (CheY-like protein)           |
| V6EY51_9PROT | 3               | 15.5                         | 17.38             | 0.00                   | 2.2E+06 | 1.9E+06 | 1.9E+06 | 6           | MGMSRv2__0970 | Uncharacterized protein                                            |
| V6F2M1_9PROT | 9               | 15.1                         | 73.42             | 0.00                   | 2.2E+06 | 1.9E+06 | 1.9E+06 | 15          | nuoG          | NADH-quinone oxidoreductase                                        |

| Protein IDs  | Unique peptides | Unique sequence coverage [%] | Mol. weight [kDa] | Relative abundance (%) | iBAQ 1  | iBAQ 2  | iBAQ 3  | MS/MS Count | Gene name     | Protein description                                                                                                           |
|--------------|-----------------|------------------------------|-------------------|------------------------|---------|---------|---------|-------------|---------------|-------------------------------------------------------------------------------------------------------------------------------|
| V6F7A2_9PROT | 7               | 16.1                         | 48.93             | 0.00                   | 1.7E+06 | 1.8E+06 | 2.3E+06 | 15          | degP          | Putative serine protease (DegP periplasmic, membrane-associated serine endoprotease, protease Do), containing two PDZ domains |
| V6F2H5_9PROT | 3               | 8.8                          | 38.48             | 0.00                   | 1.9E+06 | 1.9E+06 | 2.1E+06 | 8           | pfkA          | ATP-dependent 6-phosphofructokinase                                                                                           |
| V6EYD7_9PROT | 9               | 12.6                         | 79.10             | 0.00                   | 2.1E+06 | 1.8E+06 | 1.8E+06 | 13          | fusA          | Elongation factor G                                                                                                           |
| V6EZK7_9PROT | 4               | 9.2                          | 64.62             | 0.00                   | 1.8E+06 | 2.1E+06 | 1.6E+06 | 9           | ilvI          | Acetolactate synthase                                                                                                         |
| V6F7R4_9PROT | 5               | 6                            | 68.99             | 0.00                   | 1.8E+06 | 2.0E+06 | 1.7E+06 | 8           | htpG          | Chaperone protein HtpG                                                                                                        |
| V6F6Z7_9PROT | 8               | 15.6                         | 51.55             | 0.00                   | 1.9E+06 | 1.7E+06 | 1.9E+06 | 12          | guaB          | Inosine-5-monophosphate dehydrogenase                                                                                         |
| V6EYE0_9PROT | 4               | 10.1                         | 45.27             | 0.00                   | 1.8E+06 | 2.0E+06 | 1.6E+06 | 7           | eno           | Enolase                                                                                                                       |
| V6EWQ8_9PROT | 4               | 9.2                          | 48.96             | 0.00                   | 1.8E+06 | 1.7E+06 | 1.8E+06 | 9           | gltX          | Glutamate--tRNA ligase                                                                                                        |
| V6F3J1_9PROT | 3               | 11.8                         | 42.74             | 0.00                   | 1.8E+06 | 1.6E+06 | 1.8E+06 | 8           | dfp           | Fused 4-phosphopantothenoylecysteine decarboxylase<br>phosphopantothenoylecysteine synthetase, FMN-binding                    |
| V6EWF0_9PROT | 4               | 17.5                         | 30.44             | 0.00                   | 1.8E+06 | 1.7E+06 | 1.6E+06 | 7           | livF          | High-affinity branched-chain amino acid transport ATP-binding protein                                                         |
| V6EZG7_9PROT | 6               | 10.1                         | 72.30             | 0.00                   | 1.8E+06 | 1.6E+06 | 1.6E+06 | 14          | MGMSRv2__0216 | Uncharacterized protein                                                                                                       |
| V6EWY1_9PROT | 5               | 6.9                          | 66.39             | 0.00                   | 1.7E+06 | 1.7E+06 | 1.6E+06 | 7           | aspS          | Aspartate--tRNA(Asp/Asn) ligase                                                                                               |
| V6EYD6_9PROT | 5               | 8                            | 67.69             | 0.00                   | 1.8E+06 | 1.6E+06 | 1.5E+06 | 9           | MGMSRv2__0957 | Peptidylprolyl isomerase                                                                                                      |
| V6EZ58_9PROT | 5               | 12.8                         | 46.29             | 0.00                   | 1.7E+06 | 1.8E+06 | 1.3E+06 | 8           | clpX          | ATP-dependent Clp protease ATP-binding subunit ClpX                                                                           |
| V6EZ87_9PROT | 3               | 18.3                         | 25.43             | 0.00                   | 1.5E+06 | 1.7E+06 | 1.5E+06 | 6           | MGMSRv2__0126 | Uncharacterized protein                                                                                                       |
| V6F1G3_9PROT | 4               | 11.2                         | 36.32             | 0.00                   | 1.7E+06 | 1.7E+06 | 1.2E+06 | 9           | MGMSRv2__2145 | Putative amino-acid ABC transporter, substrate-binding protein                                                                |
| V6F500_9PROT | 2               | 7.1                          | 29.18             | 0.00                   | 1.5E+06 | 1.3E+06 | 1.4E+06 | 6           | MGMSRv2__3380 | Putative glycosyltransferase                                                                                                  |
| V6F7Q6_9PROT | 6               | 10.7                         | 59.32             | 0.00                   | 1.3E+06 | 1.4E+06 | 1.4E+06 | 10          | MGMSRv2__3303 | Uncharacterized protein                                                                                                       |

| Protein IDs  | Unique peptides | Unique sequence coverage [%] | Mol. weight [kDa] | Relative abundance (%) | iBAQ 1  | iBAQ 2  | iBAQ 3  | MS/MS Count | Gene name     | Protein description                                                      |
|--------------|-----------------|------------------------------|-------------------|------------------------|---------|---------|---------|-------------|---------------|--------------------------------------------------------------------------|
| V6F3L2_9PROT | 4               | 11                           | 45.81             | 0.00                   | 1.6E+06 | 8.7E+05 | 1.5E+06 | 6           | MGMSRv2__2910 | Putative Glycosyltransferase                                             |
| V6F1Z6_9PROT | 6               | 7                            | 100.54            | 0.00                   | 1.3E+06 | 1.2E+06 | 1.3E+06 | 11          | valS          | Valine--tRNA ligase                                                      |
| V6F8F5_9PROT | 4               | 25.8                         | 18.31             | 0.00                   | 1.3E+06 | 1.3E+06 | 1.3E+06 | 6           | bfr           | Bacterioferritin                                                         |
| V6EYE5_9PROT | 2               | 5.9                          | 48.84             | 0.00                   | 1.2E+06 | 1.2E+06 | 1.3E+06 | 8           | pdhB          | Pyruvate dehydrogenase E1 component, beta subunit                        |
| V6EZV8_9PROT | 3               | 9.1                          | 43.48             | 0.00                   | 1.2E+06 | 1.2E+06 | 1.2E+06 | 7           | fabF          | 3-oxoacyl-[acyl-carrier-protein] synthase 2                              |
| V6F6X4_9PROT | 4               | 11.3                         | 47.54             | 0.00                   | 1.2E+06 | 9.9E+05 | 1.2E+06 | 7           | MGMSRv2__3989 | Chaperone SurA                                                           |
| V6EY46_9PROT | 2               | 5.2                          | 47.12             | 0.00                   | 1.1E+06 | 1.1E+06 | 1.2E+06 | 6           | glgC          | Glucose-1-phosphate adenylyltransferase                                  |
| V6EW90_9PROT | 2               | 5.7                          | 46.02             | 0.00                   | 1.1E+06 | 1.0E+06 | 1.1E+06 | 6           | kdtA          | 3-deoxy-D-manno-octulosonic-acid transferase (KDO transferase)           |
| V6F6Y7_9PROT | 4               | 9.2                          | 48.24             | 0.00                   | 9.4E+05 | 1.1E+06 | 9.1E+05 | 7           | ctpA          | Carboxy-terminal processing protease                                     |
| V6F0N7_9PROT | 4               | 5.6                          | 95.76             | 0.00                   | 6.0E+05 | 5.7E+05 | 6.0E+05 | 6           | MGMSRv2__1809 | Oxidoreductase, FAD/iron-sulfur cluster-binding domain protein           |
| V6F126_9PROT | 6               | 7.9                          | 86.33             | 0.00                   | 5.5E+05 | 5.2E+05 | 5.5E+05 | 8           | MGMSRv2__0983 | Putative methyl-accepting chemotaxis protein                             |
| V6F7B3_9PROT | 3               | 5.4                          | 62.52             | 0.00                   | 6.0E+05 | 4.9E+05 | 4.9E+05 | 7           | MGMSRv2__4042 | Putative transporter subunits of ABC superfamily: ATP-binding components |
