# Supplementary material for: Bacterial Magnetosomes Release Iron Ions and Induce Regulation of Iron Homeostasis in Endothelial Cells
Source: MDPI journal article supplement (doi:10.3390/nano12223995), 2022-11-13
Supplement: s1 [file s1]

Table S5. Abundance ratios of all identified proteins from TMT-labeled quantitative proteomics of ECs treated with MAGs at 4 timepoints.

| Abundance Ratio |              |              |              |              |              |              |              |              |               |               |               | Accession ID | Gene name | Protein Description                                                            |
|-----------------|--------------|--------------|--------------|--------------|--------------|--------------|--------------|--------------|---------------|---------------|---------------|--------------|-----------|--------------------------------------------------------------------------------|
| 1 d<br>M1/C1    | 1 d<br>M2/C2 | 1 d<br>M3/C3 | 4 d<br>M1/C1 | 4 d<br>M2/C2 | 4 d<br>M3/C3 | 7 d<br>M1/C1 | 7 d<br>M2/C2 | 7 d<br>M3/C3 | 10 d<br>M1/C1 | 10 d<br>M2/C2 | 10 d<br>M3/C3 |              |           |                                                                                |
| 1.006           | 1.019        | 1.006        | 0.991        | 0.964        | 1.029        | 0.984        | 1.018        | 1.018        | 0.980         | 0.985         | 1.001         | Q9C0C9       | UBE2O     | (E3-independent) E2 ubiquitin-conjugating enzyme                               |
| 0.993           | 1.027        | 1.037        | 1.005        | 0.966        | 1.050        | 1.037        | 1.030        | 0.975        | 1.023         | 0.966         | 1.011         | O14874       | BCKDK     | [3-methyl-2-oxobutanoate dehydrogenase [lipoamide]] kinase, mitochondrial      |
| 1.000           | 0.984        | 1.027        | 0.932        | 0.871        | 0.962        | 0.976        | 0.949        | 0.942        | 0.922         | 0.930         | 1.063         | O94851       | MICAL2    | [F-actin]-methionine sulfoxide oxidase MICAL2                                  |
| 1.029           | 0.986        | 1.016        | 0.997        | 0.997        | 0.986        | 1.012        | 1.027        | 1.002        | 1.004         | 0.958         | 1.023         | Q7RTP6       | MICAL3    | [F-actin]-methionine sulfoxide oxidase MICAL3                                  |
| 1.039           | 1.016        | 0.988        | 0.993        | 0.961        | 0.980        | 1.017        | 1.003        | 1.000        | 0.956         | 1.035         | 1.028         | Q15118       | PDK1      | [Pyruvate dehydrogenase (acetyl-transferring)] kinase isozyme 1, mitochondrial |
| 0.988           | 0.969        | 1.102        | 0.987        | 0.854        | 1.069        | 0.978        | 1.046        | 1.000        |               |               |               | Q15119       | PDK2      | [Pyruvate dehydrogenase (acetyl-transferring)] kinase isozyme 2, mitochondrial |
| 1.093           | 1.050        | 1.044        | 1.086        | 0.952        | 1.058        | 0.995        | 1.129        | 1.036        | 1.043         | 0.990         | 1.031         | Q9BV57       | ADI1      | 1,2-dihydroxy-3-keto-5-methylthiopentene dioxygenase                           |
| 0.998           | 0.977        | 0.981        | 1.013        | 0.979        | 1.003        | 1.019        | 1.044        | 1.036        | 1.019         | 0.998         | 0.988         | Q04446       | GBE1      | 1,4-alpha-glucan-branching enzyme                                              |
| 0.972           | 0.986        | 0.949        | 0.992        | 0.959        | 0.995        | 0.956        | 0.963        | 0.961        | 0.996         | 0.966         | 0.971         | P61604       | HSPE1     | 10 kDa heat shock protein, mitochondrial                                       |
| 1.002           | 1.000        | 1.030        | 0.996        | 1.005        | 1.024        | 0.976        | 1.002        | 1.021        | 0.942         | 1.011         | 0.981         | Q15029       | EFTUD2    | 116 kDa U5 small nuclear ribonucleoprotein component                           |
| 0.949           | 0.964        | 1.004        | 0.927        | 1.178        | 0.967        | 0.935        | 0.646        | 1.016        | 0.996         | 0.979         | 1.041         | Q9NRX4       | PHPT1     | 14 kDa phosphohistidine phosphatase                                            |
| 1.042           | 1.010        | 0.988        | 0.982        | 1.008        | 0.936        | 0.992        | 1.003        | 0.974        | 1.014         | 1.014         | 1.013         | P31946       | YWHAB     | 14-3-3 protein beta/alpha                                                      |
| 0.995           | 1.017        | 0.993        | 1.030        | 1.125        | 1.000        | 1.053        | 0.975        | 1.026        | 1.010         | 1.015         | 0.983         | P62258       | YWHAE     | 14-3-3 protein epsilon                                                         |
| 0.991           | 0.993        | 0.995        | 0.992        | 1.117        | 0.947        | 0.982        | 0.861        | 1.008        | 0.999         | 0.979         | 1.016         | Q04917       | YWHAH     | 14-3-3 protein eta                                                             |
| 0.957           | 1.006        | 0.989        | 0.996        | 1.062        | 1.006        | 0.985        | 0.971        | 1.030        | 0.991         | 1.034         | 0.974         | P61981       | YWHAG     | 14-3-3 protein gamma                                                           |
| 0.945           | 0.993        | 0.987        | 0.981        | 1.052        | 0.963        | 0.954        | 0.930        | 0.987        | 0.962         | 1.004         | 0.959         | P31947       | SFN       | 14-3-3 protein sigma                                                           |
| 1.022           | 0.990        | 0.997        | 1.016        | 1.161        | 0.969        | 1.042        | 0.943        | 1.062        | 1.003         | 1.006         | 1.028         | P27348       | YWHAQ     | 14-3-3 protein theta                                                           |
| 1.076           | 1.019        | 1.009        | 1.059        | 1.293        | 1.006        | 1.034        | 0.972        | 1.081        | 1.009         | 1.050         | 0.982         | P63104       | YWHAZ     | 14-3-3 protein zeta/delta                                                      |
|                 |              |              | 0.937        | 1.118        | 1.089        | 0.985        | 1.010        | 1.068        | 1.008         | 0.881         | 1.050         | Q9BPX1       | HSD17B14  | 17-beta-hydroxysteroid dehydrogenase 14                                        |
| 1.025           | 0.994        | 1.031        | 1.000        | 0.961        | 0.972        | 0.999        | 0.953        | 0.983        | 1.009         | 0.944         | 1.043         | Q9C0C2       | TNKS1BP1  | 182 kDa tankyrase-1-binding protein                                            |
| 1.021           | 1.020        | 1.024        | 0.978        | 1.003        | 0.962        | 1.009        | 1.098        | 1.062        | 0.911         | 0.977         | 1.141         | Q8WTS1       | ABHD5     | 1-acylglycerol-3-phosphate O-acyltransferase ABHD5                             |
| 1.004           | 0.982        | 1.007        | 0.965        | 0.899        | 1.050        | 1.068        | 1.087        | 1.029        | 1.067         | 1.034         | 1.112         | Q99943       | AGPAT1    | 1-acyl-sn-glycerol-3-phosphate acyltransferase alpha                           |
| 0.989           | 1.033        | 0.977        | 1.041        | 0.921        | 1.065        | 1.144        | 0.887        | 1.146        | 1.140         | 1.153         | 1.044         | O15120       | AGPAT2    | 1-acyl-sn-glycerol-3-phosphate acyltransferase beta                            |
| 1.057           | 0.936        | 0.962        | 0.993        | 0.970        | 1.014        | 1.040        | 1.008        | 1.027        | 1.029         | 0.964         | 1.007         | Q9NRZ5       | AGPAT4    | 1-acyl-sn-glycerol-3-phosphate acyltransferase delta                           |
| 1.019           | 0.982        | 1.017        | 0.996        | 0.940        | 1.026        | 0.997        | 0.897        | 1.031        | 0.960         | 1.066         | 0.950         | Q9NUQ2       | AGPAT5    | 1-acyl-sn-glycerol-3-phosphate acyltransferase epsilon                         |

| Abundance Ratio |              |              |              |              |              |              |              |              |               |               |               | Accession ID | Gene name | Protein Description                                               |
|-----------------|--------------|--------------|--------------|--------------|--------------|--------------|--------------|--------------|---------------|---------------|---------------|--------------|-----------|-------------------------------------------------------------------|
| 1 d<br>M1/C1    | 1 d<br>M2/C2 | 1 d<br>M3/C3 | 4 d<br>M1/C1 | 4 d<br>M2/C2 | 4 d<br>M3/C3 | 7 d<br>M1/C1 | 7 d<br>M2/C2 | 7 d<br>M3/C3 | 10 d<br>M1/C1 | 10 d<br>M2/C2 | 10 d<br>M3/C3 |              |           |                                                                   |
|                 |              |              | 1.070        | 0.872        | 0.941        | 0.939        | 1.165        | 1.028        |               |               |               | Q96QU6       | ACCS      | 1-aminocyclopropane-1-carboxylate synthase-like protein 1         |
| 1.062           | 1.023        | 1.121        | 1.007        | 0.942        | 1.041        | 1.094        | 0.985        | 0.998        | 1.008         | 1.029         | 1.036         | Q9Y2I7       | PIKFYVE   | 1-phosphatidylinositol 3-phosphate 5-kinase                       |
| 1.009           | 0.998        | 1.019        | 1.009        | 1.004        | 1.009        | 1.006        | 1.067        | 1.027        | 1.016         | 1.035         | 1.005         | Q01970       | PLCB3     | 1-phosphatidylinositol 4,5-bisphosphate phosphodiesterase beta-3  |
| 0.938           | 0.937        | 1.110        | 1.007        | 0.972        | 1.037        | 0.999        | 1.143        | 0.989        | 0.942         | 1.064         | 1.131         | Q8N3E9       | PLCD3     | 1-phosphatidylinositol 4,5-bisphosphate phosphodiesterase delta-3 |
| 1.045           | 0.967        | 1.024        | 0.978        | 0.969        | 0.976        | 0.995        | 1.126        | 1.002        | 0.946         | 0.902         | 0.953         | Q4KWH8       | PLCH1     | 1-phosphatidylinositol 4,5-bisphosphate phosphodiesterase eta-1   |
| 1.000           | 0.998        | 1.022        | 1.007        | 0.959        | 1.006        | 0.989        | 1.053        | 0.990        | 0.932         | 0.960         | 0.972         | P16885       | PLCG2     | 1-phosphatidylinositol 4,5-bisphosphate phosphodiesterase gamma-2 |
| 1.033           | 1.002        | 1.052        | 0.998        | 0.931        | 1.064        | 1.000        | 0.863        | 1.027        | 0.975         | 0.987         | 1.021         | Q9BZG8       | DPH1      | 2-(3-amino-3-carboxypropyl)histidine synthase subunit 1           |
| 1.009           | 1.000        | 1.033        | 0.995        | 0.962        | 1.043        | 0.997        | 1.051        | 1.025        | 1.038         | 0.980         | 1.005         | Q9BQC3       | DPH2      | 2-(3-amino-3-carboxypropyl)histidine synthase subunit 2           |
| 0.986           | 0.973        | 0.985        | 1.012        | 0.974        | 1.015        | 0.986        | 1.014        | 0.972        | 1.008         | 0.982         | 0.971         | P09543       | CNP       | 2',3'-cyclic-nucleotide 3'-phosphodiesterase                      |
| 1.017           | 0.990        | 0.974        | 0.982        | 0.956        | 0.971        | 0.993        | 1.030        | 0.977        | 0.993         | 1.008         | 0.966         | Q16698       | DECR1     | 2,4-dienoyl-CoA reductase, mitochondrial                          |
| 1.013           | 0.977        | 1.033        | 0.998        | 0.975        | 1.020        | 1.001        | 1.083        | 1.004        | 1.004         | 0.994         | 1.021         | Q6L8Q7       | PDE12     | 2',5'-phosphodiesterase 12                                        |
| 1.000           | 1.027        | 1.012        | 0.992        | 1.027        | 1.003        | 0.998        | 1.069        | 1.034        | 0.970         | 0.977         | 1.006         | Q9Y6K5       | OAS3      | 2'-5'-oligoadenylate synthase 3                                   |
| 1.017           | 0.993        | 0.999        | 1.004        | 1.043        | 1.023        | 1.018        | 1.034        | 1.016        | 0.991         | 0.998         | 0.991         | A0A087X2I1   | PSMC6     | 26S protease regulatory subunit 10B                               |
| 1.002           | 0.979        | 0.999        | 0.991        | 0.953        | 0.997        | 0.976        | 1.042        | 1.010        | 0.971         | 0.989         | 1.000         | P62191       | PSMC1     | 26S protease regulatory subunit 4                                 |
| 0.975           | 0.995        | 0.986        | 0.987        | 0.971        | 1.012        | 0.988        | 1.043        | 1.001        | 0.974         | 0.996         | 1.000         | P17980       | PSMC3     | 26S protease regulatory subunit 6A                                |
| 1.004           | 1.001        | 1.005        | 0.992        | 0.969        | 1.026        | 1.002        | 1.035        | 1.014        | 0.999         | 1.014         | 1.016         | P43686       | PSMC4     | 26S protease regulatory subunit 6B                                |
| 0.993           | 0.992        | 1.001        | 0.983        | 0.966        | 1.003        | 0.984        | 1.049        | 1.008        | 0.977         | 0.988         | 1.004         | P35998       | PSMC2     | 26S protease regulatory subunit 7                                 |
| 0.984           | 0.983        | 0.990        | 0.996        | 0.988        | 1.020        | 1.005        | 1.044        | 1.038        | 0.994         | 1.001         | 1.036         | P62195       | PSMC5     | 26S protease regulatory subunit 8                                 |
| 0.984           | 0.997        | 0.995        | 0.991        | 0.996        | 1.004        | 0.993        | 1.043        | 1.010        | 0.959         | 0.984         | 0.985         | A0A087WW66   | PSMD1     | 26S proteasome non-ATPase regulatory subunit 1                    |
| 0.996           | 0.992        | 0.942        | 0.983        | 0.961        | 1.044        | 0.962        | 1.038        | 1.039        | 0.935         | 1.029         | 0.973         | Q99460       | PSMD1     | 26S proteasome non-ATPase regulatory subunit 1                    |
| 1.014           | 0.978        | 1.006        | 0.995        | 0.943        | 0.995        | 0.998        | 1.034        | 0.987        | 1.013         | 0.997         | 0.974         | O75832       | PSMD10    | 26S proteasome non-ATPase regulatory subunit 10                   |
| 0.992           | 1.013        | 1.016        | 1.001        | 1.018        | 0.994        | 0.971        | 1.035        | 1.014        | 0.948         | 0.993         | 0.983         | O00231       | PSMD11    | 26S proteasome non-ATPase regulatory subunit 11                   |
| 0.977           | 0.992        | 1.003        | 1.004        | 0.972        | 1.018        | 0.995        | 1.017        | 1.027        | 0.948         | 0.990         | 0.999         | O00232       | PSMD12    | 26S proteasome non-ATPase regulatory subunit 12                   |
| 0.995           | 0.984        | 1.005        | 0.997        | 1.015        | 0.997        | 1.000        | 1.036        | 0.998        | 0.983         | 0.983         | 0.983         | Q9UNM6       | PSMD13    | 26S proteasome non-ATPase regulatory subunit 13                   |
| 0.923           | 0.967        | 0.967        | 1.001        | 0.967        | 0.989        | 0.959        | 0.914        | 0.971        | 0.956         | 1.010         | 0.968         | O00487       | PSMD14    | 26S proteasome non-ATPase regulatory subunit 14                   |
| 1.000           | 1.011        | 1.002        | 1.019        | 0.988        | 0.986        | 0.989        | 1.021        | 0.984        | 0.982         | 0.994         | 0.961         | Q13200       | PSMD2     | 26S proteasome non-ATPase regulatory subunit 2                    |

| Abundance Ratio |              |              |              |              |              |              |              |              |               |               |               | Accession ID | Gene name | Protein Description                            |
|-----------------|--------------|--------------|--------------|--------------|--------------|--------------|--------------|--------------|---------------|---------------|---------------|--------------|-----------|------------------------------------------------|
| 1 d<br>M1/C1    | 1 d<br>M2/C2 | 1 d<br>M3/C3 | 4 d<br>M1/C1 | 4 d<br>M2/C2 | 4 d<br>M3/C3 | 7 d<br>M1/C1 | 7 d<br>M2/C2 | 7 d<br>M3/C3 | 10 d<br>M1/C1 | 10 d<br>M2/C2 | 10 d<br>M3/C3 |              |           |                                                |
| 0.995           | 1.009        | 0.995        | 0.991        | 0.968        | 1.004        | 0.977        | 1.019        | 0.984        | 0.974         | 0.983         | 0.976         | Q43242       | PSMD3     | 26S proteasome non-ATPase regulatory subunit 3 |
| 1.070           | 1.138        | 1.001        | 0.976        | 0.980        | 0.864        | 0.953        | 1.367        | 1.049        | 0.969         | 1.020         | 1.068         | Q5VWC4       | PSMD4     | 26S proteasome non-ATPase regulatory subunit 4 |
| 0.999           | 0.992        | 0.991        | 0.993        | 1.022        | 0.996        | 0.988        | 0.978        | 0.986        | 0.993         | 0.993         | 0.985         | P55036       | PSMD4     | 26S proteasome non-ATPase regulatory subunit 4 |
| 0.987           | 1.017        | 1.011        | 1.007        | 1.020        | 1.026        | 0.988        | 1.066        | 1.028        | 0.990         | 0.990         | 1.011         | Q16401       | PSMD5     | 26S proteasome non-ATPase regulatory subunit 5 |
| 0.981           | 0.988        | 0.977        | 1.001        | 0.980        | 1.027        | 0.978        | 0.985        | 1.018        | 0.967         | 0.983         | 0.975         | Q15008       | PSMD6     | 26S proteasome non-ATPase regulatory subunit 6 |
| 0.984           | 1.007        | 0.998        | 1.001        | 1.015        | 0.983        | 0.948        | 1.013        | 0.977        | 0.931         | 0.979         | 0.917         | P51665       | PSMD7     | 26S proteasome non-ATPase regulatory subunit 7 |
| 1.011           | 0.993        | 0.992        | 1.016        | 0.987        | 0.973        | 0.984        | 1.059        | 0.975        | 0.953         | 0.991         | 0.942         | P48556       | PSMD8     | 26S proteasome non-ATPase regulatory subunit 8 |
| 1.044           | 0.977        | 1.017        | 1.016        | 1.018        | 1.010        | 1.016        | 0.916        | 1.026        | 1.013         | 0.994         | 0.993         | O00233       | PSMD9     | 26S proteasome non-ATPase regulatory subunit 9 |
| 0.969           | 0.947        | 1.007        | 0.924        | 0.964        | 1.001        | 0.857        | 0.638        | 0.924        | 0.981         | 0.993         | 0.982         | Q13442       | PDAP1     | 28 kDa heat- and acid-stable phosphoprotein    |
| 1.032           | 1.002        | 1.064        | 0.972        | 0.944        | 1.016        | 1.000        | 0.965        | 1.001        | 0.987         | 1.021         | 0.993         | P82664       | MRPS10    | 28S ribosomal protein S10, mitochondrial       |
| 1.079           | 1.080        | 1.016        | 1.019        | 0.973        | 0.995        | 1.011        | 1.052        | 0.978        | 1.146         | 1.037         | 1.072         | P82912       | MRPS11    | 28S ribosomal protein S11, mitochondrial       |
| 1.020           | 1.039        | 0.966        | 1.016        | 1.151        | 1.004        | 1.057        | 0.931        | 1.051        | 1.058         | 0.988         | 1.078         | O15235       | MRPS12    | 28S ribosomal protein S12, mitochondrial       |
| 0.961           | 0.958        | 1.112        | 1.000        | 0.947        | 1.142        | 1.006        | 0.980        | 1.052        | 0.941         | 1.025         | 1.101         | O60783       | MRPS14    | 28S ribosomal protein S14, mitochondrial       |
| 0.995           | 1.009        | 1.010        | 0.998        | 0.962        | 1.016        | 0.992        | 0.940        | 0.960        | 1.052         | 1.029         | 1.022         | P82914       | MRPS15    | 28S ribosomal protein S15, mitochondrial       |
| 1.068           | 0.981        | 1.032        | 1.008        | 1.003        | 0.959        | 0.985        | 0.910        | 1.006        | 1.008         | 1.028         | 1.003         | Q9Y3D3       | MRPS16    | 28S ribosomal protein S16, mitochondrial       |
| 1.053           | 0.984        | 1.008        | 1.011        | 0.973        | 0.994        | 1.018        | 0.987        | 0.983        | 1.079         | 1.031         | 1.055         | Q9Y676       | MRPS18B   | 28S ribosomal protein S18b, mitochondrial      |
| 0.975           | 1.115        | 0.944        | 1.025        | 0.987        | 0.876        | 0.982        | 1.086        | 1.025        | 1.023         | 0.998         | 0.929         | Q9Y3D5       | MRPS18C   | 28S ribosomal protein S18c, mitochondrial      |
| 0.998           | 1.010        | 1.003        | 0.980        | 0.977        | 1.021        | 1.014        | 1.024        | 1.001        | 1.050         | 1.013         | 1.032         | Q9Y399       | MRPS2     | 28S ribosomal protein S2, mitochondrial        |
| 0.912           | 0.986        | 0.971        | 0.967        | 1.023        | 1.108        | 1.010        | 1.004        | 1.061        | 1.021         | 1.043         | 1.038         | A0A075B746   | MRPS21    | 28S ribosomal protein S21, mitochondrial       |
| 0.983           | 1.021        | 0.977        | 0.991        | 0.978        | 1.000        | 1.007        | 1.006        | 1.011        | 1.019         | 0.992         | 0.987         | P82650       | MRPS22    | 28S ribosomal protein S22, mitochondrial       |
| 1.070           | 1.013        | 0.999        | 1.011        | 0.959        | 0.987        | 1.030        | 1.048        | 1.005        | 1.065         | 1.024         | 1.015         | Q9Y3D9       | MRPS23    | 28S ribosomal protein S23, mitochondrial       |
| 1.129           | 0.980        | 1.077        | 0.983        | 0.927        | 1.005        | 0.912        | 0.951        | 0.956        | 0.947         | 0.957         | 0.931         | Q96EL2       | MRPS24    | 28S ribosomal protein S24, mitochondrial       |
| 1.012           | 1.042        | 0.994        | 0.997        | 0.949        | 0.979        | 1.008        | 1.041        | 1.006        | 0.997         | 1.014         | 1.006         | P82663       | MRPS25    | 28S ribosomal protein S25, mitochondrial       |
| 1.018           | 0.989        | 1.023        | 0.989        | 0.967        | 0.990        | 1.010        | 0.964        | 0.981        | 1.031         | 1.022         | 1.029         | Q9BYN8       | MRPS26    | 28S ribosomal protein S26, mitochondrial       |
| 0.987           | 0.990        | 1.012        | 0.960        | 0.997        | 1.023        | 1.034        | 0.985        | 0.977        | 0.997         | 0.961         | 1.037         | Q9Y2Q9       | MRPS28    | 28S ribosomal protein S28, mitochondrial       |
| 1.025           | 1.007        | 0.986        | 0.988        | 0.988        | 0.976        | 1.010        | 0.995        | 1.011        | 1.026         | 1.013         | 0.979         | P51398       | DAP3      | 28S ribosomal protein S29, mitochondrial       |
| 0.999           | 0.981        | 0.986        | 0.994        | 0.974        | 1.001        | 0.981        | 1.022        | 1.006        | 0.993         | 0.982         | 0.985         | Q92665       | MRPS31    | 28S ribosomal protein S31, mitochondrial       |
| 1.008           | 0.979        | 0.996        | 1.004        | 0.984        | 0.979        | 0.979        | 1.072        | 0.996        | 0.974         | 1.017         | 1.000         | Q9Y291       | MRPS33    | 28S ribosomal protein S33, mitochondrial       |
| 0.983           | 1.004        | 1.009        | 0.992        | 1.044        | 0.985        | 1.018        | 1.027        | 0.990        | 1.049         | 1.009         | 1.062         | C9JJ19       | MRPS34    | 28S ribosomal protein S34, mitochondrial       |
| 0.952           | 1.011        | 1.002        | 0.975        | 0.996        | 1.033        | 1.022        | 0.937        | 1.011        | 1.054         | 1.014         | 1.066         | P82673       | MRPS35    | 28S ribosomal protein S35, mitochondrial       |
| 0.993           | 1.025        | 0.989        | 1.008        | 0.932        | 0.990        | 0.986        | 1.041        | 1.043        | 0.946         | 1.020         | 1.006         | P82909       | MRPS36    | 28S ribosomal protein S36, mitochondrial       |
| 0.978           | 0.994        | 1.017        | 0.980        | 0.998        | 1.036        | 1.013        | 0.968        | 0.985        | 1.027         | 1.005         | 1.059         | P82675       | MRPS5     | 28S ribosomal protein S5, mitochondrial        |
| 1.020           | 1.014        | 0.983        | 0.954        | 1.020        | 0.970        | 1.039        | 0.908        | 1.025        | 1.087         | 0.968         | 1.037         | P82932       | MRPS6     | 28S ribosomal protein S6, mitochondrial        |
| 1.024           | 1.020        | 1.005        | 0.981        | 0.994        | 0.978        | 1.012        | 1.053        | 0.999        | 0.970         | 0.970         | 0.980         | J3QLS3       | MRPS7     | 28S ribosomal protein S7, mitochondrial        |

| Abundance Ratio |              |              |              |              |              |              |              |              |               |               |               | Accession ID | Gene name | Protein Description                                                     |
|-----------------|--------------|--------------|--------------|--------------|--------------|--------------|--------------|--------------|---------------|---------------|---------------|--------------|-----------|-------------------------------------------------------------------------|
| 1 d<br>M1/C1    | 1 d<br>M2/C2 | 1 d<br>M3/C3 | 4 d<br>M1/C1 | 4 d<br>M2/C2 | 4 d<br>M3/C3 | 7 d<br>M1/C1 | 7 d<br>M2/C2 | 7 d<br>M3/C3 | 10 d<br>M1/C1 | 10 d<br>M2/C2 | 10 d<br>M3/C3 |              |           |                                                                         |
| 0.998           | 1.025        | 0.986        | 0.992        | 0.995        | 0.998        | 0.995        | 0.999        | 0.999        | 1.040         | 1.006         | 1.036         | P82933       | MRPS9     | 28S ribosomal protein S9, mitochondrial                                 |
| 0.909           | 1.032        | 0.960        | 1.006        | 1.048        | 1.046        | 1.180        | 1.183        | 1.026        | 1.322         | 1.078         | 1.326         | Q8TDX5       | ACMSD     | 2-amino-3-carboxymuconate-6-semialdehyde decarboxylase                  |
| 0.968           | 0.985        | 1.026        | 0.969        | 0.972        | 1.014        | 1.026        | 1.027        | 1.000        | 1.006         | 1.001         | 1.059         | Q96SZ5       | ADO       | 2-aminoethanethiol dioxygenase                                          |
| 1.003           | 0.957        | 1.063        | 0.948        | 0.981        | 1.002        | 0.962        | 1.023        | 1.033        | 0.915         | 0.984         | 0.974         | O43598       | DNPH1     | 2'-deoxynucleoside 5'-phosphate N-hydrolase 1                           |
| 1.019           | 1.012        | 1.025        | 0.948        | 0.920        | 1.020        | 0.982        | 1.049        | 1.012        | 0.962         | 0.958         | 1.019         | Q9UJ83       | HACL1     | 2-hydroxyacyl-CoA lyase 1                                               |
| 1.007           | 0.992        | 1.024        | 1.006        | 0.960        | 1.060        | 1.080        | 1.070        | 1.054        | 0.987         | 1.109         | 1.110         | Q16880       | UGT8      | 2-hydroxyacylsphingosine 1-beta-galactosyltransferase                   |
| 1.013           | 1.008        | 0.980        | 1.002        | 1.012        | 1.012        | 1.042        | 0.876        | 1.018        | 1.055         | 0.984         | 1.050         | Q5HYK3       | COQ5      | 2-methoxy-6-polyprenyl-1,4-benzoquinol methylase, mitochondrial         |
| 0.911           | 1.012        | 1.086        | 1.025        | 0.955        | 1.016        | 0.991        | 0.904        | 1.092        | 0.810         | 0.911         | 1.200         | Q6N063       | OGFOD2    | 2-oxoglutarate and iron-dependent oxygenase domain-containing protein 2 |
| 1.008           | 1.012        | 1.016        | 1.005        | 1.056        | 1.008        | 1.019        | 0.978        | 1.031        | 1.029         | 0.991         | 1.034         | Q02218       | OGDH      | 2-oxoglutarate dehydrogenase, mitochondrial                             |
| 0.926           | 0.980        | 1.061        | 0.987        | 1.129        | 1.026        | 0.998        | 0.725        | 1.043        | 0.985         | 0.969         | 1.006         | P21953       | BCKDHB    | 2-oxoisovalerate dehydrogenase subunit beta, mitochondrial              |
|                 |              |              | 0.982        | 0.909        | 0.934        | 0.957        | 0.986        | 1.069        | 0.956         | 0.877         | 1.001         | Q9H2F3       | HSD3B7    | 3 beta-hydroxysteroid dehydrogenase type 7                              |
| 1.038           | 1.009        | 1.002        | 1.021        | 1.163        | 0.965        | 1.029        | 0.974        | 1.032        | 1.025         | 0.977         | 1.014         | O95861       | BPNT1     | 3'(2'),5'-bisphosphate nucleotidase 1                                   |
| 1.092           | 1.019        | 0.959        | 1.031        | 1.079        | 0.939        | 1.076        | 1.049        | 1.007        | 1.070         | 0.974         | 0.966         | Q8IV48       | ERI1      | 3'-5' exoribonuclease 1                                                 |
| 1.023           | 0.988        | 1.009        | 0.995        | 0.957        | 0.989        | 1.010        | 1.030        | 1.000        | 1.017         | 0.987         | 1.028         | Q9BYD6       | MRPL1     | 39S ribosomal protein L1, mitochondrial                                 |
| 1.016           | 0.979        | 0.965        | 0.954        | 0.993        | 0.982        | 0.988        | 0.978        | 1.011        | 1.008         | 0.992         | 1.017         | Q9Y3B7       | MRPL11    | 39S ribosomal protein L11, mitochondrial                                |
| 1.031           | 1.019        | 1.032        | 1.060        | 0.953        | 1.033        | 0.924        | 1.064        | 0.997        | 0.906         | 1.024         | 0.947         | P52815       | MRPL12    | 39S ribosomal protein L12, mitochondrial                                |
| 1.026           | 1.014        | 0.993        | 0.977        | 0.986        | 0.975        | 1.006        | 1.040        | 1.002        | 1.014         | 0.986         | 1.016         | Q9BYD1       | MRPL13    | 39S ribosomal protein L13, mitochondrial                                |
| 0.972           | 0.976        | 0.984        | 0.985        | 0.912        | 0.981        | 0.938        | 0.956        | 0.988        | 1.008         | 0.986         | 1.012         | Q6P1L8       | MRPL14    | 39S ribosomal protein L14, mitochondrial                                |
| 1.007           | 1.002        | 0.973        | 0.991        | 0.955        | 0.976        | 0.974        | 1.048        | 0.983        | 0.963         | 0.990         | 0.917         | Q9P015       | MRPL15    | 39S ribosomal protein L15, mitochondrial                                |
| 1.010           | 0.953        | 0.979        | 1.010        | 1.071        | 0.987        | 0.998        | 0.997        | 1.013        | 0.962         | 1.001         | 0.963         | Q9NX20       | MRPL16    | 39S ribosomal protein L16, mitochondrial                                |
| 0.979           | 0.971        | 0.937        | 0.982        | 0.959        | 1.024        | 0.976        | 0.915        | 1.011        | 1.017         | 0.991         | 1.055         | Q9NRX2       | MRPL17    | 39S ribosomal protein L17, mitochondrial                                |
| 1.043           | 1.001        | 1.064        | 1.000        | 1.023        | 1.013        | 1.013        | 1.025        | 0.976        | 1.000         | 0.980         | 1.060         | Q9H0U6       | MRPL18    | 39S ribosomal protein L18, mitochondrial                                |
| 1.006           | 1.011        | 0.984        | 0.973        | 0.958        | 0.996        | 0.997        | 1.030        | 0.988        | 1.027         | 0.978         | 1.018         | P49406       | MRPL19    | 39S ribosomal protein L19, mitochondrial                                |
| 1.000           | 1.027        | 0.943        | 1.000        | 0.987        | 1.006        | 1.003        | 0.980        | 0.998        | 1.048         | 0.990         | 1.007         | Q5T653       | MRPL2     | 39S ribosomal protein L2, mitochondrial                                 |
| 1.064           | 0.997        | 0.991        | 1.026        | 0.965        | 1.022        | 1.019        | 1.078        | 1.041        | 1.004         | 0.966         | 1.050         | Q9BYC9       | MRPL20    | 39S ribosomal protein L20, mitochondrial                                |
| 1.034           | 1.013        | 0.986        | 0.987        | 0.970        | 0.999        | 0.983        | 0.980        | 0.989        | 1.064         | 1.006         | 1.032         | Q7Z2W9       | MRPL21    | 39S ribosomal protein L21, mitochondrial                                |
| 0.989           | 0.986        | 0.998        | 0.957        | 0.990        | 1.000        | 0.993        | 0.886        | 1.015        | 1.023         | 1.002         | 1.026         | J3KQY1       | MRPL22    | 39S ribosomal protein L22, mitochondrial                                |
| 1.075           | 1.054        | 1.017        | 0.989        | 0.932        | 0.944        | 0.953        | 1.162        | 0.940        | 0.946         | 1.007         | 1.002         | Q16540       | MRPL23    | 39S ribosomal protein L23, mitochondrial                                |
| 0.972           | 0.993        | 0.990        | 0.993        | 1.032        | 0.998        | 1.042        | 0.951        | 1.038        | 1.016         | 1.011         | 1.005         | Q96A35       | MRPL24    | 39S ribosomal protein L24, mitochondrial                                |
| 1.053           | 1.024        | 1.019        | 0.982        | 1.001        | 0.966        | 0.991        | 0.996        | 0.975        | 1.045         | 0.979         | 1.022         | Q9P0M9       | MRPL27    | 39S ribosomal protein L27, mitochondrial                                |
| 1.066           | 0.994        | 1.037        | 1.040        | 0.999        | 1.039        | 1.000        | 1.015        | 1.022        | 1.048         | 1.002         | 1.020         | Q13084       | MRPL28    | 39S ribosomal protein L28, mitochondrial                                |

| Abundance Ratio |              |              |              |              |              |              |              |              |               |               |               | Accession ID | Gene name | Protein Description                               |
|-----------------|--------------|--------------|--------------|--------------|--------------|--------------|--------------|--------------|---------------|---------------|---------------|--------------|-----------|---------------------------------------------------|
| 1 d<br>M1/C1    | 1 d<br>M2/C2 | 1 d<br>M3/C3 | 4 d<br>M1/C1 | 4 d<br>M2/C2 | 4 d<br>M3/C3 | 7 d<br>M1/C1 | 7 d<br>M2/C2 | 7 d<br>M3/C3 | 10 d<br>M1/C1 | 10 d<br>M2/C2 | 10 d<br>M3/C3 |              |           |                                                   |
| 0.969           | 0.990        | 0.982        | 0.984        | 0.958        | 1.023        | 1.028        | 0.989        | 1.007        | 1.040         | 1.025         | 1.059         | E7ETU7       | MRPL3     | 39S ribosomal protein L3, mitochondrial           |
| 1.028           | 1.002        | 0.994        | 0.963        | 0.951        | 1.007        | 0.917        | 0.904        | 0.988        | 1.041         | 1.016         | 1.056         | Q9BYC8       | MRPL32    | 39S ribosomal protein L32, mitochondrial          |
| 1.022           | 1.002        | 0.975        | 1.006        | 1.024        | 0.922        | 1.012        | 0.973        | 1.037        | 1.005         | 0.990         | 1.036         | O75394       | MRPL33    | 39S ribosomal protein L33, mitochondrial          |
| 1.080           | 1.056        | 1.010        | 0.980        | 0.910        | 0.963        | 0.990        | 1.029        | 0.956        | 1.090         | 1.003         | 0.992         | M0R226       | MRPL34    | 39S ribosomal protein L34, mitochondrial          |
| 0.996           | 1.046        | 0.981        | 1.051        | 1.212        | 1.033        | 1.089        | 1.025        | 1.034        | 1.057         | 1.012         | 0.995         | Q9NZE8       | MRPL35    | 39S ribosomal protein L35, mitochondrial          |
| 1.002           | 0.998        | 1.006        | 0.987        | 0.973        | 0.971        | 1.017        | 1.041        | 0.988        | 1.019         | 0.989         | 1.018         | Q9BZE1       | MRPL37    | 39S ribosomal protein L37, mitochondrial          |
| 0.969           | 0.987        | 0.972        | 0.960        | 0.966        | 1.014        | 1.022        | 1.009        | 1.046        | 1.027         | 1.029         | 1.034         | Q96DV4       | MRPL38    | 39S ribosomal protein L38, mitochondrial          |
| 0.953           | 0.984        | 0.976        | 0.973        | 0.928        | 0.983        | 0.996        | 0.973        | 0.985        | 1.035         | 0.975         | 1.032         | Q9NYK5       | MRPL39    | 39S ribosomal protein L39, mitochondrial          |
| 1.016           | 1.015        | 0.994        | 0.955        | 0.944        | 0.996        | 0.999        | 1.070        | 1.002        | 0.991         | 1.008         | 0.980         | Q9BYD3       | MRPL4     | 39S ribosomal protein L4, mitochondrial           |
| 1.083           | 0.973        | 1.016        | 1.016        | 0.958        | 1.013        | 1.011        | 1.028        | 0.997        | 0.966         | 0.971         | 0.974         | Q9NQ50       | MRPL40    | 39S ribosomal protein L40, mitochondrial          |
| 0.959           | 0.969        | 0.926        | 1.015        | 0.977        | 1.017        | 1.008        | 0.998        | 1.024        | 1.014         | 0.971         | 0.988         | Q8IXM3       | MRPL41    | 39S ribosomal protein L41, mitochondrial          |
| 0.868           | 0.949        | 0.966        | 0.959        | 0.923        | 1.064        | 0.949        | 0.961        | 0.950        | 1.109         | 0.938         | 0.989         | S4R2Z7       | MRPL42    | 39S ribosomal protein L42, mitochondrial          |
| 0.967           | 1.010        | 1.039        | 0.973        | 1.004        | 1.001        | 0.982        | 0.988        | 1.011        | 0.985         | 1.006         | 0.969         | Q9H9J2       | MRPL44    | 39S ribosomal protein L44, mitochondrial          |
| 1.017           | 1.004        | 0.967        | 0.991        | 0.967        | 0.973        | 0.999        | 1.048        | 0.994        | 1.009         | 1.005         | 1.017         | A0A087X2D5   | MRPL45    | 39S ribosomal protein L45, mitochondrial          |
| 1.052           | 0.967        | 0.997        | 0.944        | 0.944        | 1.000        | 0.986        | 0.939        | 0.983        | 1.015         | 0.959         | 1.032         | Q9H2W6       | MRPL46    | 39S ribosomal protein L46, mitochondrial          |
| 1.048           | 0.989        | 1.006        | 0.995        | 1.124        | 0.990        | 1.022        | 0.992        | 1.077        | 1.062         | 0.974         | 1.015         | Q9HD33       | MRPL47    | 39S ribosomal protein L47, mitochondrial          |
| 0.984           | 1.051        | 1.000        | 0.957        | 0.939        | 1.024        | 1.005        | 0.982        | 0.953        | 1.056         | 1.008         | 1.073         | Q96GC5       | MRPL48    | 39S ribosomal protein L48, mitochondrial          |
| 1.025           | 0.983        | 1.015        | 0.939        | 0.966        | 1.016        | 1.019        | 1.019        | 1.030        | 1.041         | 0.962         | 1.062         | Q13405       | MRPL49    | 39S ribosomal protein L49, mitochondrial          |
| 1.034           | 1.003        | 1.021        | 0.976        | 0.909        | 1.008        | 0.994        | 1.038        | 1.002        | 1.031         | 1.006         | 1.010         | Q8N5N7       | MRPL50    | 39S ribosomal protein L50, mitochondrial          |
| 0.904           | 1.032        | 0.985        | 1.001        | 0.897        | 0.984        | 1.041        | 1.090        | 1.019        | 1.029         | 0.953         | 0.996         | Q4U2R6       | MRPL51    | 39S ribosomal protein L51, mitochondrial          |
| 1.070           | 0.923        | 1.147        | 0.893        | 0.948        | 1.012        | 0.871        | 0.878        | 0.958        | 0.872         | 0.966         | 0.962         | Q86TS9       | MRPL52    | 39S ribosomal protein L52, mitochondrial          |
| 1.030           | 1.045        | 0.986        | 1.005        | 1.053        | 1.004        | 0.990        | 0.995        | 1.004        | 1.069         | 1.016         | 1.071         | Q96EL3       | MRPL53    | 39S ribosomal protein L53, mitochondrial          |
| 0.964           | 0.928        | 0.955        | 0.963        | 0.939        | 0.961        | 0.946        | 0.989        | 1.002        | 1.101         | 1.001         | 1.140         | Q6P161       | MRPL54    | 39S ribosomal protein L54, mitochondrial          |
| 1.044           | 0.985        | 0.985        | 0.991        | 0.969        | 0.971        | 0.981        | 1.022        | 0.998        | 1.000         | 0.974         | 1.033         | Q9BYD2       | MRPL9     | 39S ribosomal protein L9, mitochondrial           |
| 1.089           | 1.020        | 1.005        | 1.011        | 1.030        | 0.971        | 0.937        | 1.012        | 0.927        | 0.955         | 0.997         | 0.864         | Q9NVS2       | MRPS18A   | 39S ribosomal protein S18a, mitochondrial         |
| 1.029           | 1.040        | 1.018        | 0.991        | 1.018        | 0.970        | 1.015        | 1.051        | 1.025        | 1.049         | 1.015         | 1.038         | Q9NP92       | MRPS30    | 39S ribosomal protein S30, mitochondrial          |
| 0.732           | 0.980        | 0.814        | 0.863        | 0.802        | 1.075        | 1.175        | 1.114        | 0.999        |               |               |               | Q15125       | EBP       | 3-beta-hydroxysteroid-Delta(8),Delta(7)-isomerase |
| 1.006           | 1.011        | 0.991        | 0.982        | 1.027        | 0.969        | 0.989        | 1.002        | 1.030        | 0.969         | 1.006         | 0.963         | Q99714       | HSD17B10  | 3-hydroxyacyl-CoA dehydrogenase type-2            |
| 1.134           | 0.879        | 1.103        | 1.025        | 1.000        | 0.963        | 1.104        | 0.993        | 0.919        | 1.100         | 0.900         | 1.075         | Q9BUT1       | BDH2      | 3-hydroxybutyrate dehydrogenase type 2            |
| 0.988           | 1.017        | 0.984        | 1.028        | 1.015        | 0.993        | 1.037        | 1.052        | 1.001        | 1.064         | 0.970         | 0.997         | P31937       | HIBADH    | 3-hydroxyisobutyrate dehydrogenase, mitochondrial |
| 0.965           | 0.999        | 0.996        | 0.976        | 0.995        | 1.021        | 1.016        | 0.975        | 0.999        | 1.007         | 0.979         | 1.000         | Q6NVY1       | HIBCH     | 3-hydroxyisobutyryl-CoA hydrolase, mitochondrial  |
| 0.988           | 0.991        | 0.984        | 0.978        | 1.008        | 0.967        | 0.947        | 0.949        | 0.960        | 0.954         | 0.975         | 0.956         | P42765       | ACAA2     | 3-ketoacyl-CoA thiolase, mitochondrial            |

| Abundance Ratio |              |              |              |              |              |              |              |              |               |               |               | Accession ID | Gene name | Protein Description                                      |
|-----------------|--------------|--------------|--------------|--------------|--------------|--------------|--------------|--------------|---------------|---------------|---------------|--------------|-----------|----------------------------------------------------------|
| 1 d<br>M1/C1    | 1 d<br>M2/C2 | 1 d<br>M3/C3 | 4 d<br>M1/C1 | 4 d<br>M2/C2 | 4 d<br>M3/C3 | 7 d<br>M1/C1 | 7 d<br>M2/C2 | 7 d<br>M3/C3 | 10 d<br>M1/C1 | 10 d<br>M2/C2 | 10 d<br>M3/C3 |              |           |                                                          |
| 0.996           | 0.979        | 1.002        | 0.963        | 0.968        | 1.017        | 1.004        | 1.027        | 0.995        | 0.980         | 0.971         | 1.007         | P09110       | ACAA1     | 3-ketoacyl-CoA thiolase, peroxisomal                     |
| 1.001           | 1.020        | 0.985        | 1.000        | 1.114        | 0.970        | 1.009        | 1.041        | 1.055        | 0.932         | 1.036         | 0.942         | Q06136       | KDSR      | 3-ketodihydrosphingosine reductase                       |
| 1.055           | 0.980        | 0.991        | 1.018        | 0.929        | 1.081        | 1.099        | 1.113        | 0.996        | 1.048         | 1.017         | 1.006         | P56937       | HSD17B7   | 3-keto-steroid reductase                                 |
| 0.890           | 0.959        | 1.183        |              |              |              |              |              |              |               |               |               | P18405       | SRD5A1    | 3-oxo-5-alpha-steroid 4-dehydrogenase 1                  |
| 1.021           | 0.997        | 1.056        | 0.995        | 0.997        | 1.008        | 1.006        | 0.996        | 1.034        | 1.022         | 0.973         | 1.043         | Q9NWU1       | OXSM      | 3-oxoacyl-[acyl-carrier-protein] synthase, mitochondrial |
| 1.070           | 1.006        | 1.031        | 1.008        | 0.977        | 0.999        | 1.019        | 1.102        | 1.067        | 1.030         | 0.945         | 1.052         | O15530       | PDPK1     | 3-phosphoinositide-dependent protein kinase 1            |
| 1.043           | 1.001        | 1.002        | 1.021        | 0.977        | 1.024        | 1.015        | 1.012        | 0.995        | 1.038         | 1.033         | 1.019         | P46783       | RPS10     | 40S ribosomal protein S10                                |
| 1.114           | 0.998        | 0.986        | 1.040        | 1.092        | 0.960        | 1.011        | 0.988        | 0.982        | 0.997         | 1.042         | 0.944         | P62280       | RPS11     | 40S ribosomal protein S11                                |
| 1.241           | 1.014        | 1.054        | 1.065        | 1.678        | 0.951        | 1.122        | 0.807        | 1.087        | 0.987         | 0.993         | 0.953         | P25398       | RPS12     | 40S ribosomal protein S12                                |
| 1.039           | 0.990        | 1.006        | 1.020        | 0.983        | 1.008        | 1.010        | 1.033        | 0.993        | 1.031         | 1.003         | 1.008         | P62277       | RPS13     | 40S ribosomal protein S13                                |
| 0.996           | 1.007        | 0.980        | 1.008        | 0.967        | 0.968        | 0.973        | 1.033        | 0.976        | 0.975         | 1.012         | 0.993         | P62263       | RPS14     | 40S ribosomal protein S14                                |
| 0.947           | 1.062        | 0.945        | 1.038        | 1.013        | 0.961        | 1.030        | 1.067        | 0.953        | 1.008         | 1.045         | 0.940         | K7ELC2       | RPS15     | 40S ribosomal protein S15                                |
| 0.972           | 0.944        | 0.941        |              |              |              |              |              |              | 1.130         | 1.004         | 1.435         | K7EJ78       | RPS15     | 40S ribosomal protein S15                                |
| 1.147           | 0.964        | 0.970        | 1.049        | 1.407        | 0.940        | 1.031        | 0.934        | 1.064        | 0.972         | 1.012         | 0.998         | P62244       | RPS15A    | 40S ribosomal protein S15a                               |
| 1.072           | 0.989        | 0.999        | 1.015        | 1.037        | 1.011        | 0.988        | 0.990        | 1.007        | 0.985         | 0.999         | 0.929         | P62249       | RPS16     | 40S ribosomal protein S16                                |
| 0.973           | 0.997        | 0.954        | 1.031        | 1.081        | 0.972        | 0.995        | 0.996        | 1.004        | 0.993         | 1.033         | 0.948         | P08708       | RPS17     | 40S ribosomal protein S17                                |
| 1.012           | 1.034        | 0.936        | 0.899        | 0.957        | 0.998        |              |              |              | 1.064         | 1.069         | 1.183         | A0A0G2JQH2   | RPS18     | 40S ribosomal protein S18                                |
| 1.024           | 1.015        | 0.990        | 1.028        | 0.983        | 1.008        | 0.989        | 1.030        | 0.990        | 1.042         | 1.046         | 1.026         | P62269       | RPS18     | 40S ribosomal protein S18                                |
| 1.015           | 0.981        | 0.969        | 0.992        | 0.973        | 1.000        | 0.995        | 0.995        | 0.985        | 1.040         | 1.020         | 0.988         | P39019       | RPS19     | 40S ribosomal protein S19                                |
| 1.085           | 1.000        | 0.999        | 1.018        | 1.074        | 1.019        | 1.024        | 1.025        | 1.034        | 0.976         | 1.018         | 0.965         | P15880       | RPS2      | 40S ribosomal protein S2                                 |
| 1.027           | 1.014        | 0.976        | 1.000        | 0.991        | 0.998        | 1.027        | 0.966        | 1.025        | 1.041         | 1.015         | 1.017         | P60866       | RPS20     | 40S ribosomal protein S20                                |
| 1.077           | 0.983        | 0.987        | 1.053        | 1.209        | 0.988        | 1.052        | 0.913        | 0.997        | 1.041         | 1.014         | 1.024         | P63220       | RPS21     | 40S ribosomal protein S21                                |
| 1.035           | 0.996        | 0.982        | 1.007        | 1.001        | 0.973        | 0.955        | 1.004        | 0.955        | 0.964         | 1.032         | 0.926         | P62266       | RPS23     | 40S ribosomal protein S23                                |
| 1.042           | 0.988        | 1.001        | 0.972        | 0.999        | 1.040        | 0.958        | 0.952        | 0.989        | 1.025         | 1.041         | 1.032         | P62851       | RPS25     | 40S ribosomal protein S25                                |
| 1.026           | 0.985        | 0.999        | 0.998        | 1.108        | 0.975        | 0.981        | 0.967        | 1.012        | 0.967         | 1.025         | 0.978         | P62854       | RPS26     | 40S ribosomal protein S26                                |
| 1.014           | 0.920        | 1.013        | 1.022        | 0.977        | 1.080        | 0.950        | 0.949        | 0.994        | 1.058         | 1.027         | 1.004         | P42677       | RPS27     | 40S ribosomal protein S27                                |
| 1.052           | 1.031        | 0.951        | 1.043        | 1.026        | 0.958        | 1.081        | 1.105        | 0.971        | 1.143         | 1.042         | 0.983         | H0YMV8       | RPS27L    | 40S ribosomal protein S27                                |
| 1.054           | 1.023        | 1.019        | 1.044        | 1.179        | 1.017        | 0.995        | 0.964        | 1.122        | 1.051         | 1.056         | 1.068         | P62857       | RPS28     | 40S ribosomal protein S28                                |
| 0.994           | 0.998        | 0.976        | 1.010        | 1.030        | 0.998        | 1.017        | 1.052        | 1.009        | 0.998         | 1.011         | 1.002         | P23396       | RPS3      | 40S ribosomal protein S3                                 |
| 0.954           | 0.903        | 0.907        | 0.892        | 0.989        | 0.976        | 0.987        | 0.870        | 0.965        | 0.994         | 0.903         | 0.923         | E9PR30       | FAU       | 40S ribosomal protein S30                                |
| 1.050           | 1.006        | 1.012        | 1.023        | 1.085        | 0.981        | 1.007        | 0.996        | 1.023        | 0.988         | 1.029         | 0.997         | P61247       | RPS3A     | 40S ribosomal protein S3a                                |
| 1.033           | 1.017        | 0.988        | 1.032        | 1.047        | 1.018        | 0.991        | 1.017        | 1.010        | 0.991         | 1.032         | 0.957         | P62701       | RPS4X     | 40S ribosomal protein S4, X isoform                      |
| 1.097           | 0.998        | 1.031        | 1.043        | 1.293        | 0.980        | 1.091        | 0.868        | 1.111        | 1.018         | 1.027         | 1.024         | P46782       | RPS5      | 40S ribosomal protein S5                                 |

| Abundance Ratio |              |              |              |              |              |              |              |              |               |               |               | Accession ID | Gene name | Protein Description                                       |
|-----------------|--------------|--------------|--------------|--------------|--------------|--------------|--------------|--------------|---------------|---------------|---------------|--------------|-----------|-----------------------------------------------------------|
| 1 d<br>M1/C1    | 1 d<br>M2/C2 | 1 d<br>M3/C3 | 4 d<br>M1/C1 | 4 d<br>M2/C2 | 4 d<br>M3/C3 | 7 d<br>M1/C1 | 7 d<br>M2/C2 | 7 d<br>M3/C3 | 10 d<br>M1/C1 | 10 d<br>M2/C2 | 10 d<br>M3/C3 |              |           |                                                           |
| 1.056           | 1.003        | 1.006        | 1.003        | 1.094        | 1.013        | 0.984        | 0.859        | 1.018        | 1.040         | 1.045         | 1.001         | P62753       | RPS6      | 40S ribosomal protein S6                                  |
| 1.026           | 1.000        | 0.997        | 0.988        | 0.988        | 1.010        | 0.963        | 0.977        | 0.958        | 1.001         | 1.017         | 0.963         | P62081       | RPS7      | 40S ribosomal protein S7                                  |
| 1.049           | 1.004        | 1.007        | 1.022        | 1.047        | 0.950        | 0.958        | 0.952        | 0.991        | 0.903         | 1.035         | 0.872         | P62241       | RPS8      | 40S ribosomal protein S8                                  |
| 0.977           | 0.971        | 1.002        | 0.999        | 0.958        | 1.027        | 0.981        | 0.997        | 1.003        | 1.010         | 1.009         | 1.023         | P46781       | RPS9      | 40S ribosomal protein S9                                  |
| 1.118           | 1.040        | 1.085        |              |              |              | 1.144        | 1.018        | 1.088        |               |               |               | F8WD59       | RPSA      | 40S ribosomal protein SA (Fragment)                       |
| 1.040           | 1.014        | 0.977        | 1.016        | 1.040        | 0.955        | 1.002        | 1.069        | 1.009        | 0.989         | 1.017         | 0.961         | A0A0C4DG17   | RPSA      | 40S ribosomal protein SA                                  |
| 1.126           | 1.171        | 1.184        | 1.270        | 1.195        | 1.294        | 1.062        | 0.992        | 1.099        | 1.123         | 1.030         | 1.093         | Q9BRK5       | SDF4      | 45 kDa calcium-binding protein                            |
| 0.990           | 1.008        | 0.990        | 1.001        | 1.000        | 0.980        | 1.013        | 1.010        | 1.001        | 0.968         | 0.946         | 1.006         | P49189       | ALDH9A1   | 4-trimethylaminobutyraldehyde dehydrogenase               |
| 1.096           | 1.289        | 1.201        |              |              |              |              |              |              |               |               |               | Q9H816       | DCLRE1B   | 5' exonuclease Apollo                                     |
| 1.065           | 1.015        | 1.079        | 1.068        | 1.156        | 1.113        | 1.047        | 1.087        | 1.107        | 1.100         | 1.036         | 1.104         | Q8TCD5       | NT5C      | 5'(3')-deoxyribonucleotidase, cytosolic type              |
| 1.134           | 1.041        | 1.124        | 1.025        | 0.789        | 1.036        | 1.015        | 1.090        | 1.045        | 0.930         | 0.943         | 1.035         | O43422       | THAP12    | 52 kDa repressor of the inhibitor of the protein kinase   |
| 1.064           | 0.969        | 1.015        | 0.985        | 0.975        | 1.003        | 1.001        | 1.017        | 1.019        | 1.011         | 0.966         | 0.997         | Q8IZH2       | XRN1      | 5'-3' exoribonuclease 1                                   |
| 1.024           | 0.997        | 1.055        | 1.013        | 0.973        | 1.011        | 1.017        | 1.025        | 1.008        | 0.993         | 1.012         | 0.980         | Q9H0D6       | XRN2      | 5'-3' exoribonuclease 2                                   |
| 0.909           | 0.927        | 0.942        | 0.860        | 0.611        | 0.883        |              |              |              | 0.879         | 0.969         | 1.186         | Q00013       | MPP1      | 55 kDa erythrocyte membrane protein                       |
| 0.999           | 1.375        | 1.152        | 1.044        | 0.931        | 1.059        | 1.140        | 0.955        | 0.975        | 1.006         | 1.052         | 1.116         | P13196       | ALAS1     | 5-aminolevulinate synthase, nonspecific, mitochondrial    |
| 1.082           | 1.088        | 0.969        | 1.016        | 1.052        | 1.012        | 1.053        | 1.048        | 1.047        | 1.157         | 0.994         | 1.053         | P54646       | PRKAA2    | 5'-AMP-activated protein kinase catalytic subunit alpha-2 |
| 1.072           | 1.052        | 1.026        | 1.035        | 0.958        | 0.964        | 0.976        | 1.096        | 1.029        | 0.984         | 0.978         | 0.936         | Q9Y478       | PRKAB1    | 5'-AMP-activated protein kinase subunit beta-1            |
| 0.984           | 0.989        | 0.991        | 0.978        | 1.009        | 0.965        | 0.982        | 0.995        | 0.922        | 0.867         | 1.024         | 1.065         | O43741       | PRKAB2    | 5'-AMP-activated protein kinase subunit beta-2            |
| 1.053           | 0.994        | 1.029        | 1.005        | 0.953        | 1.038        | 1.023        | 1.078        | 1.018        | 0.951         | 0.990         | 0.980         | P54619       | PRKAG1    | 5'-AMP-activated protein kinase subunit gamma-1           |
| 0.997           | 0.989        | 1.013        | 0.971        | 0.960        | 1.009        | 0.985        | 1.054        | 0.986        | 0.956         | 0.926         | 1.003         | Q9UGJ0       | PRKAG2    | 5'-AMP-activated protein kinase subunit gamma-2           |
| 0.927           | 0.988        | 0.995        | 1.048        | 0.973        | 1.077        | 0.966        | 0.908        | 0.893        | 1.045         | 1.047         | 0.957         | Q9H6S1       | AZI2      | 5-azacytidine-induced protein 2                           |
| 1.019           | 1.003        | 0.999        | 1.011        | 0.947        | 0.994        | 0.988        | 1.020        | 0.964        | 1.005         | 1.002         | 1.030         | Q99807       | COQ7      | 5-demethoxyubiquinone hydroxylase, mitochondrial          |
| 1.054           | 1.013        | 1.028        | 0.992        | 0.967        | 1.005        | 1.024        | 0.994        | 1.015        | 1.066         | 1.010         | 1.024         | P49914       | MTHFS     | 5-formyltetrahydrofolate cyclo-ligase                     |
| 1.046           | 0.969        | 1.033        | 0.994        | 0.961        | 1.068        | 1.085        | 0.948        | 0.987        | 1.057         | 0.978         | 0.979         | Q96CB9       | NSUN4     | 5-methylcytosine rRNA methyltransferase NSUN4             |
| 0.975           | 1.048        | 0.962        | 1.012        | 0.977        | 1.022        | 0.988        | 0.999        | 1.009        | 0.974         | 1.009         | 0.983         | Q5TFE4       | NT5DC1    | 5'-nucleotidase domain-containing protein 1               |
| 0.991           | 0.997        | 1.028        | 1.012        | 0.962        | 1.000        | 0.985        | 1.088        | 1.063        | 0.943         | 0.991         | 1.017         | Q86UY8       | NT5DC3    | 5'-nucleotidase domain-containing protein 3               |
| 1.011           | 1.014        | 1.024        | 1.093        | 0.985        | 1.034        | 1.121        | 1.133        | 1.095        | 1.128         | 1.062         | 1.175         | P21589       | NT5E      | 5'-nucleotidase                                           |
| 0.977           | 1.002        | 1.026        | 0.988        | 1.043        | 1.029        | 1.022        | 0.913        | 1.021        | 1.017         | 0.980         | 1.060         | O14841       | OPLAH     | 5-oxoprolinase                                            |
| 1.058           | 1.131        | 1.076        | 1.004        | 0.901        | 0.984        | 0.982        | 1.090        | 1.010        | 1.055         | 1.098         | 1.049         | Q8IUZ5       | PHYKPL    | 5-phosphohydroxy-L-lysine phospho-lyase                   |
| 1.070           | 1.000        | 1.011        | 0.981        | 1.053        | 0.985        | 0.981        | 1.002        | 0.991        | 1.026         | 0.995         | 0.991         | P56378       | MP68      | 6.8 kDa mitochondrial proteolipid                         |



| Abundance Ratio |              |              |              |              |              |              |              |              |               |               |               | Accession ID | Gene name | Protein Description                        |
|-----------------|--------------|--------------|--------------|--------------|--------------|--------------|--------------|--------------|---------------|---------------|---------------|--------------|-----------|--------------------------------------------|
| 1 d<br>M1/C1    | 1 d<br>M2/C2 | 1 d<br>M3/C3 | 4 d<br>M1/C1 | 4 d<br>M2/C2 | 4 d<br>M3/C3 | 7 d<br>M1/C1 | 7 d<br>M2/C2 | 7 d<br>M3/C3 | 10 d<br>M1/C1 | 10 d<br>M2/C2 | 10 d<br>M3/C3 |              |           |                                            |
| 0.950           | 1.006        | 0.986        | 0.993        | 1.017        | 1.024        | 0.990        | 1.014        | 1.018        | 0.977         | 0.993         | 0.974         | P10809       | HSPD1     | 60 kDa heat shock protein, mitochondrial   |
| 1.008           | 1.000        |              | 1.017        | 1.003        | 1.004        | 1.014        | 0.949        | 1.006        | 1.007         | 0.976         | 0.970         | P10155       | TROVE2    | 60 kDa SS-A/Ro ribonucleoprotein           |
|                 |              |              | 0.880        | 0.861        | 1.064        | 0.890        | 1.070        | 1.026        | 1.007         | 0.849         | 1.038         | F8VZS0       | RPLP0     | 60S acidic ribosomal protein P0 (Fragment) |
| 1.010           | 0.998        | 1.003        | 1.010        | 1.048        | 0.987        | 1.016        | 1.030        | 1.036        | 0.985         | 1.027         | 0.989         | P05388       | RPLP0     | 60S acidic ribosomal protein P0            |
| 1.090           | 0.957        | 0.954        | 0.951        | 1.088        | 0.991        | 0.948        | 1.011        | 1.331        | 0.932         | 0.996         | 0.977         | P05386       | RPLP1     | 60S acidic ribosomal protein P1            |
| 1.032           | 1.012        | 1.006        | 1.006        | 0.943        | 0.976        | 0.960        | 1.095        | 0.977        | 0.971         | 1.021         | 0.999         | P05387       | RPLP2     | 60S acidic ribosomal protein P2            |
| 0.994           | 1.050        | 0.985        | 1.014        | 0.999        | 1.018        | 0.971        | 1.098        | 0.974        | 1.008         | 1.039         | 1.022         | C9JA08       | NMD3      | 60S ribosomal export protein NMD3          |
| 1.131           | 0.987        | 1.077        | 1.071        | 0.923        | 0.805        | 0.746        | 0.911        | 0.843        | 0.641         | 1.181         | 0.643         | F8W7C6       | RPL10     | 60S ribosomal protein L10                  |
| 1.036           | 0.977        | 1.011        | 1.020        | 1.101        | 0.957        | 0.958        | 0.874        | 0.995        | 0.936         | 1.011         | 0.922         | P27635       | RPL10     | 60S ribosomal protein L10                  |
| 1.024           | 1.004        | 0.999        | 1.027        | 1.071        | 0.990        | 1.012        | 0.980        | 1.035        | 0.932         | 1.052         | 0.900         | P62906       | RPL10A    | 60S ribosomal protein L10a                 |
| 1.025           | 1.009        | 0.997        | 1.012        | 1.133        | 1.017        | 0.997        | 0.946        | 1.076        | 1.020         | 1.037         | 1.016         | P62913       | RPL11     | 60S ribosomal protein L11                  |
| 1.053           | 0.984        | 0.975        | 1.025        | 1.099        | 0.971        | 1.019        | 0.988        | 1.012        | 1.016         | 1.005         | 0.987         | P30050       | RPL12     | 60S ribosomal protein L12                  |
| 0.956           | 0.988        | 0.954        | 1.004        | 0.967        | 1.014        | 0.991        | 0.905        | 0.997        | 1.063         | 1.022         | 1.028         | P26373       | RPL13     | 60S ribosomal protein L13                  |
| 0.992           | 1.029        | 0.990        | 1.006        | 1.037        | 1.001        | 1.000        | 1.005        | 0.990        | 1.049         | 1.016         | 0.993         | P40429       | RPL13A    | 60S ribosomal protein L13a                 |
| 1.068           | 0.961        | 1.063        | 0.991        | 1.109        | 0.976        | 0.882        | 0.775        | 0.982        | 0.866         | 1.035         | 0.898         | P50914       | RPL14     | 60S ribosomal protein L14                  |
| 1.040           | 1.000        | 0.993        | 1.004        | 0.989        | 1.026        | 0.967        | 0.958        | 1.013        | 1.002         | 1.037         | 1.003         | P61313       | RPL15     | 60S ribosomal protein L15                  |
| 1.034           | 1.012        | 1.020        | 0.982        | 1.022        | 1.012        | 0.986        | 1.017        | 1.017        | 0.998         | 1.040         | 1.019         | G3V203       | RPL18     | 60S ribosomal protein L18                  |
| 1.013           | 1.020        | 0.980        | 1.040        | 1.136        | 0.985        | 1.016        | 0.905        | 0.982        | 1.020         | 1.026         | 0.956         | Q02543       | RPL18A    | 60S ribosomal protein L18a                 |
| 0.949           | 1.044        | 0.971        | 0.996        | 0.994        | 1.007        | 0.969        | 0.999        | 0.983        | 1.031         | 1.059         | 0.975         | P84098       | RPL19     | 60S ribosomal protein L19                  |
| 0.944           | 0.978        | 0.933        | 0.983        | 0.984        | 0.985        | 0.961        | 0.951        | 0.961        | 0.984         | 0.995         | 0.977         | P46778       | RPL21     | 60S ribosomal protein L21                  |
| 1.003           | 0.971        | 0.981        | 1.009        | 1.000        | 0.995        | 0.966        | 1.047        | 1.035        | 0.930         | 1.010         | 0.971         | P35268       | RPL22     | 60S ribosomal protein L22                  |
| 1.021           | 1.011        | 0.983        | 1.012        | 1.061        | 0.998        | 1.014        | 1.043        | 1.034        | 0.996         | 1.021         | 0.990         | P62829       | RPL23     | 60S ribosomal protein L23                  |
| 0.997           | 0.994        | 0.978        | 0.993        | 0.954        | 1.008        | 0.989        | 1.023        | 0.986        | 1.028         | 1.013         | 0.999         | P62750       | RPL23A    | 60S ribosomal protein L23a                 |
| 1.000           | 1.009        | 0.992        | 0.987        | 1.118        | 1.022        | 0.964        | 0.862        | 1.005        | 0.998         | 1.029         | 1.010         | P83731       | RPL24     | 60S ribosomal protein L24                  |
| 1.043           | 1.007        | 1.007        | 0.986        | 0.936        | 1.053        | 0.996        | 0.999        | 0.961        | 0.942         | 1.000         | 0.877         | P61254       | RPL26     | 60S ribosomal protein L26                  |
| 1.114           | 1.090        | 0.993        | 1.078        | 0.928        | 1.080        | 0.952        | 0.932        | 0.973        | 1.175         | 1.054         | 0.994         | Q9UNX3       | RPL26L1   | 60S ribosomal protein L26-like 1           |
| 1.015           | 1.010        | 0.978        | 0.994        | 0.958        | 0.973        | 0.992        | 1.060        | 0.969        | 0.977         | 1.012         | 0.997         | P61353       | RPL27     | 60S ribosomal protein L27                  |
| 1.073           | 0.999        | 0.983        | 1.025        | 1.139        | 0.989        | 1.005        | 0.927        | 1.022        | 1.053         | 0.997         | 0.991         | P46776       | RPL27A    | 60S ribosomal protein L27a                 |
| 1.100           | 1.011        | 0.996        | 1.010        | 0.998        | 0.997        | 0.993        | 0.957        | 0.950        | 0.973         | 1.014         | 0.919         | P46779       | RPL28     | 60S ribosomal protein L28                  |
| 0.965           | 0.943        | 0.994        | 0.939        | 1.016        | 0.948        | 0.899        | 0.733        | 0.906        | 1.042         | 1.046         | 0.988         | P47914       | RPL29     | 60S ribosomal protein L29                  |
| 0.935           | 1.006        | 0.943        | 1.016        | 1.060        | 1.010        | 1.025        | 0.961        | 0.990        | 1.039         | 1.040         | 1.031         | P39023       | RPL3      | 60S ribosomal protein L3                   |
| 1.005           | 1.001        | 1.004        | 1.039        | 1.128        | 0.968        | 0.976        | 0.899        | 1.010        | 0.936         | 1.015         | 0.952         | P62888       | RPL30     | 60S ribosomal protein L30                  |
| 0.996           | 1.013        | 0.956        | 0.980        | 0.995        | 1.032        | 0.975        | 0.959        | 0.946        | 1.091         | 1.036         | 1.021         | P62899       | RPL31     | 60S ribosomal protein L31                  |
|                 |              |              |              |              |              | 1.026        | 1.011        | 1.055        |               |               |               | D3YTI8       | RPL32     | 60S ribosomal protein L32 (Fragment)       |



| Abundance Ratio |              |              |              |              |              |              |              |              |               |               |               | Accession ID | Gene name | Protein Description                                    |
|-----------------|--------------|--------------|--------------|--------------|--------------|--------------|--------------|--------------|---------------|---------------|---------------|--------------|-----------|--------------------------------------------------------|
| 1 d<br>M1/C1    | 1 d<br>M2/C2 | 1 d<br>M3/C3 | 4 d<br>M1/C1 | 4 d<br>M2/C2 | 4 d<br>M3/C3 | 7 d<br>M1/C1 | 7 d<br>M2/C2 | 7 d<br>M3/C3 | 10 d<br>M1/C1 | 10 d<br>M2/C2 | 10 d<br>M3/C3 |              |           |                                                        |
| 1.000           | 1.026        | 0.974        | 1.041        | 1.107        | 0.968        | 0.985        | 0.949        | 0.995        | 0.950         | 1.023         | 0.908         | F8W727       | RPL32     | 60S ribosomal protein L32                              |
| 1.213           | 1.014        | 0.995        | 1.020        | 1.315        | 0.952        | 1.056        | 0.794        | 0.980        | 1.046         | 1.029         | 0.969         | P49207       | RPL34     | 60S ribosomal protein L34                              |
| 1.054           | 1.017        | 0.998        | 0.942        | 0.949        | 0.996        | 0.871        | 0.841        | 0.925        | 0.948         | 1.063         | 0.916         | P42766       | RPL35     | 60S ribosomal protein L35                              |
| 1.060           | 1.002        | 1.001        | 1.037        | 1.076        | 0.994        | 1.019        | 0.900        | 0.993        | 1.015         | 1.039         | 0.968         | P18077       | RPL35A    | 60S ribosomal protein L35a                             |
| 0.941           | 1.020        | 0.941        | 1.014        | 1.063        | 1.032        | 1.044        | 1.016        | 1.025        | 1.073         | 1.023         | 1.019         | Q9Y3U8       | RPL36     | 60S ribosomal protein L36                              |
| 1.058           | 1.014        | 0.951        | 0.988        | 1.036        | 0.999        | 1.025        | 0.914        | 0.966        | 1.041         | 1.007         | 0.935         | J3KQN4       | RPL36A    | 60S ribosomal protein L36a                             |
| 0.991           | 0.997        | 0.971        | 1.007        | 0.925        | 1.035        | 1.105        | 0.940        | 0.937        | 0.945         | 0.892         | 0.986         | Q969Q0       | RPL36AL   | 60S ribosomal protein L36a-like                        |
| 0.901           | 0.900        | 1.040        | 0.833        | 1.106        | 0.941        | 0.720        | 0.509        | 0.910        | 0.900         | 1.119         | 1.105         | P61927       | RPL37     | 60S ribosomal protein L37                              |
| 1.286           | 1.025        | 1.060        | 1.073        | 1.205        | 0.937        | 0.973        | 0.886        | 0.950        | 0.878         | 1.023         | 0.811         | P61513       | RPL37A    | 60S ribosomal protein L37a                             |
| 1.051           | 1.025        | 1.006        | 1.017        | 0.991        | 1.014        | 0.996        | 1.098        | 1.046        | 1.007         | 1.010         | 0.987         | P63173       | RPL38     | 60S ribosomal protein L38                              |
| 1.075           | 1.059        | 0.902        | 0.970        | 0.978        | 1.045        | 0.915        | 1.048        | 1.013        | 0.955         | 1.006         | 0.977         | P62891       | RPL39     | 60S ribosomal protein L39                              |
| 1.009           | 1.001        | 1.006        | 1.012        | 1.085        | 1.006        | 0.976        | 0.950        | 1.032        | 0.969         | 1.011         | 0.952         | P36578       | RPL4      | 60S ribosomal protein L4                               |
| 0.944           | 1.028        | 0.932        | 1.021        | 1.080        | 0.976        | 1.036        | 1.000        | 0.964        | 1.044         | 1.067         | 0.969         | P46777       | RPL5      | 60S ribosomal protein L5                               |
|                 |              |              | 1.180        | 0.815        | 1.566        |              |              |              |               |               |               | F8VR69       | RPL6      | 60S ribosomal protein L6 (Fragment)                    |
| 1.024           | 1.008        | 1.013        | 0.994        | 0.948        | 0.990        | 0.943        | 0.964        | 0.961        | 0.974         | 1.011         | 0.933         | Q02878       | RPL6      | 60S ribosomal protein L6                               |
| 1.017           | 1.026        | 0.980        | 1.020        | 1.053        | 1.002        | 0.998        | 1.054        | 1.029        | 1.034         | 1.016         | 0.987         | P18124       | RPL7      | 60S ribosomal protein L7                               |
| 1.021           | 0.999        | 0.951        | 1.002        | 1.064        | 0.962        | 1.001        | 1.013        | 0.993        | 1.007         | 1.022         | 0.963         | P62424       | RPL7A     | 60S ribosomal protein L7a                              |
| 1.075           | 1.028        | 1.017        | 1.029        | 0.989        | 1.041        | 0.982        | 1.122        | 1.009        | 0.974         | 1.052         | 0.972         | Q6DKI1       | RPL7L1    | 60S ribosomal protein L7-like 1                        |
| 1.054           | 0.992        | 0.943        | 1.022        | 0.984        | 0.943        | 0.975        | 0.970        | 0.936        | 0.980         | 0.991         | 0.913         | P62917       | RPL8      | 60S ribosomal protein L8                               |
| 1.037           | 1.002        | 1.007        | 1.038        | 1.071        | 0.966        | 1.010        | 1.042        | 0.974        | 1.005         | 1.041         | 0.988         | P32969       | RPL9      | 60S ribosomal protein L9                               |
| 1.088           | 0.987        | 0.979        | 1.047        | 1.215        | 0.977        | 1.082        | 0.979        | 1.084        | 1.063         | 0.961         | 0.988         | Q9Y221       | NIP7      | 60S ribosome subunit biogenesis protein NIP7 homolog   |
| 1.061           | 1.010        | 1.030        | 1.034        | 1.006        | 1.029        | 1.006        | 1.054        | 1.013        | 1.032         | 1.058         | 0.995         | O60825       | PFKFB2    | 6-phosphofructo-2-kinase/fructose-2,6-bisphosphatase 2 |
| 0.975           | 0.953        | 1.143        | 1.033        | 0.930        | 1.013        | 1.087        | 1.001        | 0.958        | 1.084         | 1.045         | 1.043         | Q5VX20       | PFKFB3    | 6-phosphofructo-2-kinase/fructose-2,6-bisphosphatase 3 |
| 0.901           | 0.911        | 0.923        | 1.084        | 0.891        | 1.012        | 1.065        | 1.144        | 0.880        |               |               |               | Q16877       | PFKFB4    | 6-phosphofructo-2-kinase/fructose-2,6-bisphosphatase 4 |
| 0.945           | 0.994        | 1.000        | 0.981        | 1.024        | 0.996        | 0.998        | 0.991        | 1.012        | 1.024         | 1.019         | 1.052         | P52209       | PGD       | 6-phosphogluconate dehydrogenase, decarboxylating      |
| 1.029           | 1.005        | 1.007        | 0.986        | 1.025        | 0.974        | 1.020        | 1.002        | 0.993        | 1.020         | 0.974         | 1.009         | O95336       | PGLS      | 6-phosphogluconolactonase                              |
|                 |              |              | 1.075        | 0.863        | 1.129        | 0.986        | 1.105        | 1.013        | 1.048         | 1.023         | 1.074         | Q03393       | PTS       | 6-pyruvoyl tetrahydrobiopterin synthase                |
| 0.982           | 1.007        | 0.954        | 0.958        | 0.951        | 1.009        | 0.998        | 0.980        | 0.995        | 0.959         | 0.967         | 1.009         | P36639       | NUDT1     | 7,8-dihydro-8-oxoguanine triphosphatase                |
| 1.001           | 1.018        | 1.001        | 0.999        | 0.968        | 0.975        | 0.986        | 1.033        | 0.960        | 0.937         | 0.964         | 0.934         | P11021       | HSPA5     | 78 kDa glucose-regulated protein                       |
| 0.899           | 1.005        | 0.957        | 0.958        | 0.935        | 1.027        | 1.129        | 1.098        | 1.042        | 1.274         | 1.094         | 1.132         | Q9UBM7       | DHCR7     | 7-dehydrocholesterol reductase                         |

| Abundance Ratio |              |              |              |              |              |              |              |              |               |               |               | Accession ID | Gene name | Protein Description                                              |
|-----------------|--------------|--------------|--------------|--------------|--------------|--------------|--------------|--------------|---------------|---------------|---------------|--------------|-----------|------------------------------------------------------------------|
| 1 d<br>M1/C1    | 1 d<br>M2/C2 | 1 d<br>M3/C3 | 4 d<br>M1/C1 | 4 d<br>M2/C2 | 4 d<br>M3/C3 | 7 d<br>M1/C1 | 7 d<br>M2/C2 | 7 d<br>M3/C3 | 10 d<br>M1/C1 | 10 d<br>M2/C2 | 10 d<br>M3/C3 |              |           |                                                                  |
| 1.016           | 0.991        | 1.025        | 0.997        | 1.037        | 0.930        | 1.016        | 1.066        | 1.008        | 0.957         | 0.992         | 0.972         | Q969T7       | NT5C3B    | 7-methylguanosine phosphate-specific 5'-nucleotidase             |
| 1.063           | 0.982        | 1.010        | 0.999        | 0.938        | 1.020        | 1.003        | 1.053        | 0.989        | 1.033         | 0.976         | 0.968         | Q7L2J0       | MEPCE     | 7SK snRNA methylphosphate capping enzyme                         |
| 0.978           | 1.051        | 1.161        |              |              |              |              |              |              |               |               |               | O60733       | PLA2G6    | 85/88 kDa calcium-independent phospholipase A2                   |
|                 |              |              | 1.066        | 0.919        | 0.946        | 0.953        | 1.163        | 1.106        | 0.928         | 1.013         | 0.790         | Q6ZVK8       | NUDT18    | 8-oxo-dGDP phosphatase NUDT18                                    |
| 1.363           | 0.758        | 0.976        | 1.091        | 0.974        | 0.917        | 0.864        | 1.193        | 1.136        | 0.989         | 1.043         | 1.061         | Q9UHI8       | ADAMTS1   | A disintegrin and metalloproteinase with thrombospondin motifs 1 |
|                 |              |              | 1.112        | 0.861        | 0.762        |              |              |              |               |               |               | Q9UKP4       | ADAMTS7   | A disintegrin and metalloproteinase with thrombospondin motifs 7 |
| 1.080           | 1.040        | 0.995        | 0.956        | 0.905        | 1.003        | 1.031        | 1.107        | 1.042        | 0.974         | 0.959         | 1.013         | P42684       | ABL2      | Abelson tyrosine-protein kinase 2                                |
| 1.028           | 1.052        | 0.975        | 1.018        | 0.992        | 0.978        | 1.013        | 1.035        | 0.970        | 1.043         | 0.984         | 1.006         | Q8IZP0       | ABI1      | Abl interactor 1                                                 |
| 1.004           | 1.004        | 1.018        | 1.012        | 0.975        | 1.001        | 0.926        | 0.923        | 1.005        | 1.026         | 1.052         | 0.983         | F8WAL6       | ABI2      | Abl interactor 2                                                 |
| 1.009           | 1.066        | 1.014        | 1.042        | 0.960        | 1.020        | 1.164        | 1.256        | 1.166        |               |               |               | Q8IZT6       | ASPM      | Abnormal spindle-like microcephaly-associated protein            |
| 1.034           | 1.023        | 0.990        | 0.986        | 0.897        | 1.016        | 1.074        | 0.904        | 0.993        | 1.067         | 0.993         | 1.149         | Q96K21       | ZFYVE19   | Abscission/NoCut checkpoint regulator                            |
| 0.972           | 0.955        | 1.023        | 1.016        | 0.992        | 1.062        | 1.006        | 1.005        | 1.014        | 1.056         | 1.011         | 1.053         | Q86V21       | AACS      | Acetoacetyl-CoA synthetase                                       |
| 1.022           | 1.018        | 1.062        | 1.022        | 0.968        | 0.988        | 1.017        | 1.062        | 1.029        | 1.003         | 1.016         | 1.005         | A1L0T0       | ILVBL     | Acetolactate synthase-like protein                               |
| 0.980           | 0.987        | 1.001        | 1.007        | 0.994        | 0.972        | 1.026        | 1.059        | 1.049        | 1.067         | 1.146         | 1.039         | Q9BWD1       | ACAT2     | Acetyl-CoA acetyltransferase, cytosolic                          |
| 1.003           | 0.986        | 0.962        | 1.005        | 0.970        | 0.996        | 1.015        | 0.959        | 0.975        | 1.039         | 0.956         | 0.978         | P24752       | ACAT1     | Acetyl-CoA acetyltransferase, mitochondrial                      |
| 0.762           | 1.131        | 1.193        | 0.986        | 0.816        | 1.240        |              |              |              |               |               |               | O00763       | ACACB     | Acetyl-CoA carboxylase 2                                         |
| 1.026           | 1.001        | 1.032        | 1.023        | 0.923        | 0.964        | 1.008        | 1.044        | 0.995        | 1.081         | 0.814         | 1.023         | Q9NUB1       | ACSS1     | Acetyl-coenzyme A synthetase 2-like, mitochondrial               |
| 1.284           | 0.845        | 0.977        | 1.268        | 0.742        | 1.045        | 1.251        | 0.925        | 0.957        | 1.186         | 0.976         | 1.063         | O00400       | SLC33A1   | Acetyl-coenzyme A transporter 1                                  |
| 1.056           | 0.954        | 1.177        | 0.962        | 0.990        | 1.020        | 1.222        | 1.060        | 0.998        |               |               |               | Q92484       | SMPDL3A   | Acid sphingomyelinase-like phosphodiesterase 3a                  |
| 1.074           | 0.974        | 1.073        | 1.054        | 0.990        | 1.008        | 1.035        | 0.907        | 1.029        | 1.138         | 1.026         | 1.048         | Q92485       | SMPDL3B   | Acid sphingomyelinase-like phosphodiesterase 3b                  |
| 1.048           | 0.975        | 1.031        | 0.981        | 0.962        | 1.050        | 1.032        | 1.075        | 1.041        | 0.987         | 0.880         | 1.077         | O43427       | FIBP      | Acidic fibroblast growth factor intracellular-binding protein    |
| 1.082           | 0.991        | 0.999        | 1.010        | 1.121        | 0.976        | 1.007        | 0.953        | 1.016        | 0.988         | 0.989         | 0.958         | P39687       | ANP32A    | Acidic leucine-rich nuclear phosphoprotein 32 family member A    |
| 1.026           | 0.995        | 1.007        | 0.987        | 1.100        | 0.986        | 1.032        | 0.930        | 1.023        | 0.946         | 0.986         | 0.896         | Q92688       | ANP32B    | Acidic leucine-rich nuclear phosphoprotein 32 family member B    |
| 1.057           | 0.980        | 1.030        | 1.010        | 1.075        | 1.027        | 1.039        | 1.058        | 1.051        | 0.975         | 0.996         | 1.006         | Q9BTT0       | ANP32E    | Acidic leucine-rich nuclear phosphoprotein 32 family member E    |
| 1.044           | 1.046        | 1.032        | 1.068        | 1.073        | 1.048        | 1.078        | 1.111        | 1.079        | 1.071         | 1.097         | 1.057         | A2A274       | ACO2      | Aconitate hydratase, mitochondrial                               |
|                 |              |              | 1.034        | 1.045        | 1.002        | 0.962        | 1.116        | 1.040        | 0.988         | 0.993         | 0.985         | Q8TED9       | AFAP1L1   | Actin filament-associated protein 1-like 1                       |

| Abundance Ratio |              |              |              |              |              |              |              |              |               |               |               | Accession ID | Gene name | Protein Description                                         |
|-----------------|--------------|--------------|--------------|--------------|--------------|--------------|--------------|--------------|---------------|---------------|---------------|--------------|-----------|-------------------------------------------------------------|
| 1 d<br>M1/C1    | 1 d<br>M2/C2 | 1 d<br>M3/C3 | 4 d<br>M1/C1 | 4 d<br>M2/C2 | 4 d<br>M3/C3 | 7 d<br>M1/C1 | 7 d<br>M2/C2 | 7 d<br>M3/C3 | 10 d<br>M1/C1 | 10 d<br>M2/C2 | 10 d<br>M3/C3 |              |           |                                                             |
| 0.947           | 0.954        | 1.083        | 1.371        | 1.249        | 0.904        | 1.017        | 1.191        | 1.081        |               |               |               | P68032       | ACTC1     | Actin, alpha cardiac muscle 1                               |
| 0.888           | 1.020        | 0.944        | 1.035        | 0.985        | 0.960        | 1.030        | 1.034        | 0.990        | 0.995         | 1.034         | 0.969         | P68133       | ACTA1     | Actin, alpha skeletal muscle                                |
| 0.996           | 0.989        | 0.978        | 1.068        | 1.019        | 0.960        | 1.098        | 0.950        | 0.992        | 1.031         | 0.977         | 0.976         | P60709       | ACTB      | Actin, cytoplasmic 1                                        |
| 1.135           | 1.013        | 0.967        | 0.959        | 0.958        | 1.035        | 0.934        | 1.044        | 0.951        | 0.940         | 0.922         | 1.001         | K7EM38       | ACTG1     | Actin, cytoplasmic 2 (Fragment)                             |
| 1.180           | 1.030        | 1.117        | 0.713        | 0.945        | 0.743        |              |              |              |               |               |               | O14639       | ABLIM1    | Actin-binding LIM protein 1                                 |
| 0.971           | 0.983        | 1.000        | 0.984        | 1.030        | 1.005        | 0.988        | 0.906        | 1.021        | 1.004         | 0.985         | 1.044         | O96019       | ACTL6A    | Actin-like protein 6A                                       |
| 1.047           | 0.961        | 0.988        | 1.021        | 0.982        | 1.057        | 1.025        | 1.018        | 1.017        | 0.994         | 1.034         | 1.011         | Q9NZ32       | ACTR10    | Actin-related protein 10                                    |
| 0.966           | 0.994        | 0.974        | 1.006        | 1.038        | 1.008        | 1.009        | 1.038        | 1.016        | 0.996         | 0.996         | 0.989         | P61160       | ACTR2     | Actin-related protein 2                                     |
| 1.025           | 1.005        | 0.951        | 1.028        | 1.049        | 1.005        | 1.036        | 0.970        | 1.021        | 1.028         | 1.011         | 0.980         | Q92747       | ARPC1A    | Actin-related protein 2/3 complex subunit 1A                |
| 1.048           | 1.017        | 0.999        | 1.014        | 1.076        | 0.973        | 0.987        | 0.985        | 0.999        | 0.992         | 0.994         | 0.965         | O15143       | ARPC1B    | Actin-related protein 2/3 complex subunit 1B                |
| 1.006           | 1.024        | 1.012        | 1.011        | 1.021        | 1.000        | 0.999        | 0.998        | 0.981        | 1.040         | 1.006         | 1.022         | O15144       | ARPC2     | Actin-related protein 2/3 complex subunit 2                 |
| 1.096           | 1.031        | 1.016        | 1.042        | 1.104        | 0.987        | 0.997        | 1.045        | 1.022        | 0.952         | 1.021         | 0.901         | O15145       | ARPC3     | Actin-related protein 2/3 complex subunit 3                 |
| 0.950           | 0.983        | 0.976        | 0.960        | 0.973        | 1.006        | 0.945        | 0.921        | 0.952        | 0.983         | 0.959         | 0.982         | O15511       | ARPC5     | Actin-related protein 2/3 complex subunit 5                 |
| 1.035           | 0.945        | 1.029        | 0.972        | 0.966        | 1.016        | 0.970        | 0.944        | 0.994        | 0.957         | 0.963         | 1.028         | Q9BPX5       | ARPC5L    | Actin-related protein 2/3 complex subunit 5-like protein    |
| 1.029           | 1.007        | 1.017        | 1.000        | 1.107        | 1.007        | 0.997        | 0.932        | 1.041        | 0.988         | 1.000         | 0.992         | P61158       | ACTR3     | Actin-related protein 3                                     |
|                 |              |              |              |              |              |              |              |              | 0.877         | 1.054         | 1.061         | Q9P1U1       | ACTR3B    | Actin-related protein 3B                                    |
| 0.995           | 1.014        | 1.016        | 1.009        | 0.965        | 0.993        | 1.034        | 1.076        | 0.993        | 0.975         | 0.984         | 1.100         | Q9H9F9       | ACTR5     | Actin-related protein 5                                     |
| 0.996           | 1.030        | 1.035        | 0.953        | 0.963        | 1.025        | 1.010        | 1.028        | 1.022        | 0.921         | 0.975         | 1.094         | Q9GZN1       | ACTR6     | Actin-related protein 6                                     |
| 1.071           | 1.086        | 1.084        | 1.012        | 1.054        | 1.066        |              |              |              | 0.928         | 1.012         | 1.141         | Q9H981       | ACTR8     | Actin-related protein 8                                     |
| 1.055           | 1.000        | 1.015        | 1.004        | 0.948        | 0.990        | 0.953        | 0.990        | 0.964        | 0.900         | 1.014         | 0.862         | P53999       | SUB1      | Activated RNA polymerase II transcriptional coactivator p15 |
| 1.074           | 1.013        | 1.052        | 1.009        | 1.040        | 1.011        | 0.997        | 1.112        | 1.025        | 0.984         | 0.958         | 1.003         | Q9H1I8       | ASCC2     | Activating signal cointegrator 1 complex subunit 2          |
| 1.019           | 1.025        | 1.017        | 0.990        | 0.961        | 0.982        | 1.007        | 1.037        | 1.005        | 1.025         | 0.975         | 1.041         | Q8N3C0       | ASCC3     | Activating signal cointegrator 1 complex subunit 3          |
| 1.017           | 1.015        | 1.036        | 1.024        | 1.005        | 1.022        | 1.018        | 1.060        | 1.018        | 0.988         | 1.009         | 1.040         | Q15650       | TRIP4     | Activating signal cointegrator 1                            |
| 0.993           | 1.015        | 1.000        | 0.995        | 0.983        | 0.998        | 0.978        | 1.021        | 0.989        | 0.956         | 0.986         | 0.989         | O95433       | AHSA1     | Activator of 90 kDa heat shock protein ATPase homolog 1     |
| 1.070           | 1.017        | 0.958        | 1.047        | 1.045        | 1.012        | 1.019        | 1.094        | 0.951        | 0.951         | 1.000         | 1.031         | Q9ULW3       | ABT1      | Activator of basal transcription 1                          |
| 0.910           | 0.952        | 0.956        | 0.997        | 0.933        | 1.003        | 0.985        | 1.033        | 0.997        | 1.047         | 1.032         | 1.032         | Q86WX3       | RPS19BP1  | Active regulator of SIRT1                                   |
| 1.004           | 0.964        | 1.084        | 1.079        | 0.920        | 1.170        |              |              |              | 1.209         | 0.891         | 0.951         | Q04771       | ACVR1     | Activin receptor type-1                                     |
| 1.019           | 0.995        | 0.997        | 1.006        | 0.995        | 0.987        | 1.027        | 0.962        | 1.016        | 1.031         | 1.015         | 1.021         | Q9H2P0       | ADNP      | Activity-dependent neuroprotector homeobox protein          |
| 0.999           | 0.994        | 0.986        | 1.037        | 1.147        | 1.042        | 1.003        | 0.889        | 1.085        | 1.044         | 1.023         | 1.021         | O14561       | NDUFAB1   | Acyl carrier protein, mitochondrial                         |
| 0.955           | 0.977        | 0.998        | 0.979        | 1.035        | 0.999        | 0.966        | 0.933        | 1.002        | 0.998         | 1.015         | 1.042         | C9JIF9       | APEH      | Acylamino-acid-releasing enzyme                             |

| Abundance Ratio |              |              |              |              |              |              |              |              |               |               |               | Accession ID | Gene name | Protein Description                                                      |
|-----------------|--------------|--------------|--------------|--------------|--------------|--------------|--------------|--------------|---------------|---------------|---------------|--------------|-----------|--------------------------------------------------------------------------|
| 1 d<br>M1/C1    | 1 d<br>M2/C2 | 1 d<br>M3/C3 | 4 d<br>M1/C1 | 4 d<br>M2/C2 | 4 d<br>M3/C3 | 7 d<br>M1/C1 | 7 d<br>M2/C2 | 7 d<br>M3/C3 | 10 d<br>M1/C1 | 10 d<br>M2/C2 | 10 d<br>M3/C3 |              |           |                                                                          |
| 1.006           | 1.029        | 1.018        | 0.953        | 0.946        | 1.017        | 0.975        | 1.046        | 1.013        | 1.013         | 1.014         | 1.055         | Q6JQN1       | ACAD10    | Acyl-CoA dehydrogenase family member 10                                  |
| 1.052           | 1.048        | 0.985        | 1.002        | 1.056        | 0.957        | 0.999        | 0.984        | 0.949        | 1.051         | 0.982         | 0.994         | Q709F0       | ACAD11    | Acyl-CoA dehydrogenase family member 11                                  |
| 0.981           | 0.992        | 1.029        | 0.988        | 0.979        | 1.014        | 1.026        | 1.033        | 0.985        | 1.034         | 0.983         | 1.013         | Q9H845       | ACAD9     | Acyl-CoA dehydrogenase family member 9, mitochondrial                    |
| 0.890           | 0.903        | 1.010        | 0.934        | 0.830        | 0.894        | 1.055        | 1.104        | 1.021        | 1.120         | 1.163         | 1.161         | O00767       | SCD       | Acyl-CoA desaturase                                                      |
| 1.006           | 1.027        | 1.013        | 1.006        | 0.990        | 1.025        | 1.024        | 1.002        | 1.002        | 1.048         | 0.979         | 1.038         | Q4G176       | ACSF3     | Acyl-CoA synthetase family member 3, mitochondrial                       |
| 1.042           | 1.029        | 1.082        | 0.971        | 0.955        | 1.005        | 0.997        | 1.072        | 0.993        | 1.031         | 1.003         | 1.008         | Q92604       | LPGAT1    | Acyl-CoA:lysophosphatidylglycerol acyltransferase 1                      |
| 1.058           | 0.962        | 1.014        | 0.954        | 0.905        | 0.958        | 1.001        | 0.968        | 1.000        | 1.044         | 0.949         | 1.017         | Q9BR61       | ACBD6     | Acyl-CoA-binding domain-containing protein 6                             |
| 0.998           | 0.989        | 1.011        | 0.984        | 0.967        | 0.967        | 0.986        | 0.962        | 0.985        | 1.007         | 0.974         | 0.979         | Q5T4U5       | ACADM     | Acyl-Coenzyme A dehydrogenase, C-4 to C-12 straight chain, isoform CRA_a |
| 1.001           | 0.994        | 0.998        | 1.009        | 1.020        | 1.030        | 1.044        | 1.002        | 1.027        | 1.056         | 0.991         | 1.031         | Q86TX2       | ACOT1     | Acyl-coenzyme A thioesterase 1                                           |
| 0.993           | 1.000        | 0.947        | 0.973        | 0.939        | 0.984        | 0.975        | 1.067        | 0.976        | 0.975         | 0.958         | 0.960         | Q9NPJ3       | ACOT13    | Acyl-coenzyme A thioesterase 13                                          |
| 0.925           | 1.014        | 0.987        | 0.976        | 0.961        | 0.975        | 0.961        | 1.091        | 0.993        | 0.882         | 1.045         | 0.813         | P49753       | ACOT2     | Acyl-coenzyme A thioesterase 2, mitochondrial                            |
|                 |              |              |              |              |              |              |              |              | 0.854         | 0.941         | 1.068         | Q8N9L9       | ACOT4     | Acyl-coenzyme A thioesterase 4                                           |
| 1.006           | 1.017        | 1.015        | 1.003        | 1.028        | 1.014        | 1.003        | 1.017        | 0.961        | 0.989         | 1.011         | 1.019         | O14734       | ACOT8     | Acyl-coenzyme A thioesterase 8                                           |
| 1.026           | 0.996        | 0.991        | 1.014        | 0.968        | 0.984        | 1.021        | 1.019        | 0.979        | 0.997         | 0.979         | 0.972         | Q9Y305       | ACOT9     | Acyl-coenzyme A thioesterase 9, mitochondrial                            |
| 1.008           | 1.017        | 1.033        | 0.968        | 0.970        | 1.025        | 1.018        | 1.147        | 1.110        | 1.007         | 0.983         | 1.134         | Q5T1C6       | THEM4     | Acyl-coenzyme A thioesterase THEM4                                       |
| 1.014           | 0.999        | 1.018        | 1.034        | 1.065        | 1.013        | 1.033        | 0.996        | 1.035        | 1.042         | 1.011         | 1.059         | Q53H12       | AGK       | Acylglycerol kinase, mitochondrial                                       |
| 1.017           | 0.988        | 0.949        | 0.958        | 0.937        | 0.963        | 0.927        | 1.001        | 0.951        | 0.956         | 1.032         | 0.959         | G3V2U7       | ACYP1     | Acylphosphatase                                                          |
| 0.935           | 0.966        | 0.994        | 1.012        | 1.009        | 1.079        | 0.950        | 0.936        | 0.984        | 1.152         | 0.988         | 1.123         | P14621       | ACYP2     | Acylphosphatase-2                                                        |
| 1.020           | 0.996        | 1.011        | 0.988        | 0.994        | 0.985        | 0.989        | 1.005        | 0.978        | 1.005         | 1.025         | 0.999         | O75608       | LYPLA1    | Acyl-protein thioesterase 1                                              |
| 0.985           | 1.016        | 1.002        | 0.991        | 1.018        | 1.049        | 0.982        | 1.006        | 1.013        | 0.993         | 1.003         | 1.029         | O95372       | LYPLA2    | Acyl-protein thioesterase 2                                              |
| 0.982           | 1.000        | 1.019        | 1.010        | 1.266        | 0.982        | 0.999        | 0.867        | 1.068        | 1.040         | 1.005         | 1.018         | Q6P587       | FAHD1     | Acylpyruvase FAHD1, mitochondrial                                        |
| 1.010           | 1.006        | 0.979        | 1.010        | 0.970        | 1.001        | 0.996        | 1.066        | 1.025        | 1.031         | 0.998         | 1.035         | P46108       | CRK       | Adapter molecule crk                                                     |
| 1.092           | 1.005        | 1.050        | 1.021        | 1.177        | 0.978        | 1.023        | 0.872        | 1.094        | 1.001         | 0.995         | 1.060         | Q8NC96       | NECAP1    | Adaptin ear-binding coat-associated protein 1                            |
| 0.976           | 0.996        | 1.025        | 0.982        | 1.050        | 1.036        | 0.955        | 0.895        | 1.016        | 0.992         | 0.975         | 1.057         | Q9NVZ3       | NECAP2    | Adaptin ear-binding coat-associated protein 2                            |
| 1.032           | 0.978        | 1.014        | 1.015        | 1.048        | 1.041        | 0.981        | 1.015        | 1.068        | 1.002         | 1.033         | 0.989         | P07741       | APRT      | Adenine phosphoribosyltransferase                                        |
| 1.086           | 1.197        | 1.059        | 1.055        | 0.937        | 1.054        |              |              |              |               |               |               | P25054       | APC       | Adenomatous polyposis coli protein                                       |
| 0.962           | 0.999        | 0.983        | 1.004        | 0.883        | 0.989        | 1.067        | 1.088        | 1.049        | 1.068         | 1.067         | 1.013         | Q8TB61       | SLC35B2   | Adenosine 3'-phospho 5'-phosphosulfate transporter 1                     |
| 0.830           | 1.216        | 1.014        |              |              |              | 0.904        | 1.092        | 1.076        | 1.007         | 1.039         | 0.950         | Q9H1N7       | SLC35B3   | Adenosine 3'-phospho 5'-phosphosulfate transporter 2                     |
| 0.993           | 0.999        | 1.001        | 0.999        | 0.984        | 1.014        | 0.985        | 1.020        | 0.970        | 1.007         | 0.953         | 0.996         | P00813       | ADA       | Adenosine deaminase                                                      |
| 0.889           | 0.839        | 0.916        |              |              |              |              |              |              | 1.355         | 0.891         | 1.100         | Q6DHV7       | ADAL      | Adenosine deaminase-like protein                                         |

| Abundance Ratio |              |              |              |              |              |              |              |              |               |               |               | Accession ID | Gene name | Protein Description                                 |
|-----------------|--------------|--------------|--------------|--------------|--------------|--------------|--------------|--------------|---------------|---------------|---------------|--------------|-----------|-----------------------------------------------------|
| 1 d<br>M1/C1    | 1 d<br>M2/C2 | 1 d<br>M3/C3 | 4 d<br>M1/C1 | 4 d<br>M2/C2 | 4 d<br>M3/C3 | 7 d<br>M1/C1 | 7 d<br>M2/C2 | 7 d<br>M3/C3 | 10 d<br>M1/C1 | 10 d<br>M2/C2 | 10 d<br>M3/C3 |              |           |                                                     |
| 1.056           | 1.026        | 1.035        | 1.037        | 1.096        | 0.995        | 0.980        | 0.954        | 1.006        | 0.943         | 0.955         | 0.919         | P55263       | ADK       | Adenosine kinase                                    |
| 0.979           | 0.999        | 0.974        | 0.999        | 0.990        | 0.987        | 0.969        | 1.013        | 0.988        | 0.957         | 1.000         | 0.935         | P23526       | AHCY      | Adenosylhomocysteinase                              |
| 0.793           | 0.957        | 0.987        |              |              |              |              |              |              |               |               |               | A0A0A0MSC1   | ADCY3     | Adenylate cyclase type 3                            |
| 0.942           | 1.019        | 0.971        | 1.070        | 0.987        | 1.063        | 1.017        | 1.112        | 1.057        | 1.033         | 1.041         | 1.169         | O43306       | ADCY6     | Adenylate cyclase type 6                            |
| 0.723           | 0.953        | 0.962        |              |              |              |              |              |              |               |               |               | P51828       | ADCY7     | Adenylate cyclase type 7                            |
| 1.283           | 1.143        | 1.056        | 1.089        | 0.936        | 1.027        |              |              |              |               |               |               | O60503       | ADCY9     | Adenylate cyclase type 9                            |
| 0.971           | 1.003        | 0.980        | 1.003        | 1.033        | 1.006        | 1.013        | 0.981        | 1.004        | 0.989         | 1.016         | 0.977         | P54819       | AK2       | Adenylate kinase 2, mitochondrial                   |
| 1.027           | 0.992        | 0.994        | 0.967        | 0.955        | 0.964        | 0.949        | 1.017        | 0.947        | 0.956         | 0.980         | 0.921         | P27144       | AK4       | Adenylate kinase 4, mitochondrial                   |
| 0.999           | 0.978        | 0.982        | 0.983        | 1.028        | 1.000        | 1.021        | 0.949        | 0.982        | 1.036         | 0.973         | 1.061         | Q5T9B7       | AK1       | Adenylate kinase isoenzyme 1                        |
| 0.938           | 0.974        | 0.998        | 0.972        | 0.947        | 1.011        | 0.950        | 1.150        | 1.045        | 0.923         | 0.978         | 0.967         | Q9Y3D8       | AK6       | Adenylate kinase isoenzyme 6                        |
| 0.962           | 1.009        | 1.009        | 0.987        | 0.999        | 0.978        | 0.981        | 0.973        | 0.975        | 0.955         | 0.987         | 0.993         | P30566       | ADSL      | Adenylosuccinate lyase                              |
| 0.998           | 1.018        | 0.987        | 1.043        | 1.015        | 1.019        | 1.044        | 1.018        | 1.018        | 1.028         | 1.005         | 1.024         | P30520       | ADSS      | Adenylosuccinate synthetase isozyme 2               |
| 0.982           | 1.149        | 0.861        | 1.116        | 1.175        | 0.988        | 1.071        | 1.290        | 1.168        | 1.063         | 1.047         | 0.986         | Q01518       | CAP1      | Adenylyl cyclase-associated protein 1               |
| 1.015           | 1.002        | 0.983        | 0.989        | 1.007        | 0.975        | 0.961        | 0.911        | 0.992        | 1.012         | 0.985         | 1.025         | P40123       | CAP2      | Adenylyl cyclase-associated protein 2               |
| 0.988           | 1.042        | 1.047        | 1.058        | 1.074        | 1.020        | 1.146        | 1.046        | 1.077        | 1.151         | 1.082         | 1.084         | O95396       | MOCS3     | Adenylyltransferase and sulfurtransferase MOCS3     |
| 0.956           | 0.965        | 1.090        | 0.995        | 0.930        | 1.134        | 1.040        | 1.088        | 1.102        | 1.053         | 0.997         | 1.090         | Q9UHX3       | ADGRE2    | Adhesion G protein-coupled receptor E2              |
| 1.057           | 1.091        | 1.017        | 1.065        | 1.019        | 0.946        | 1.036        | 1.010        | 0.929        |               |               |               | Q9Y653       | ADGRG1    | Adhesion G-protein coupled receptor G1              |
| 0.963           | 0.981        | 0.983        | 0.982        | 0.964        | 1.005        | 0.979        | 1.009        | 0.976        | 0.988         | 0.962         | 0.981         | Q9HDC9       | APMAP     | Adipocyte plasma membrane-associated protein        |
| 0.934           | 1.013        | 1.064        | 1.050        | 1.140        | 1.021        |              |              |              | 1.040         | 0.988         | 1.217         | Q6IQ32       | ADNP2     | ADNP homeobox protein 2                             |
| 1.055           | 1.019        | 1.104        | 1.000        | 1.017        | 0.977        | 1.023        | 1.052        | 1.015        | 0.942         | 0.986         | 0.947         | P12235       | SLC25A4   | ADP/ATP translocase 1                               |
| 0.970           | 1.002        | 1.003        | 0.992        | 1.013        | 1.005        | 0.975        | 1.023        | 1.012        | 0.933         | 0.987         | 0.926         | P05141       | SLC25A5   | ADP/ATP translocase 2                               |
| 1.005           | 1.000        | 1.046        | 0.978        | 0.961        | 1.006        | 1.006        | 1.059        | 1.009        | 1.010         | 1.043         | 1.016         | P12236       | SLC25A6   | ADP/ATP translocase 3                               |
| 0.947           | 1.013        | 1.055        | 0.976        | 0.982        | 1.012        | 1.025        | 1.114        | 1.056        | 0.956         | 1.021         | 1.035         | Q9BRR6       | ADPGK     | ADP-dependent glucokinase                           |
| 1.017           | 0.995        | 0.973        | 1.010        | 0.974        | 1.021        | 0.968        | 1.010        | 0.973        | 1.063         | 1.001         | 1.049         | Q9BW91       | NUDT9     | ADP-ribose pyrophosphatase, mitochondrial           |
|                 |              |              | 0.659        | 0.733        | 1.280        | 0.901        | 1.091        | 1.297        | 1.139         | 1.022         | 1.105         | P84077       | ARF1      | ADP-ribosylation factor 1                           |
| 0.927           | 0.992        | 0.929        | 1.026        | 0.773        | 1.129        | 1.053        | 1.189        | 0.969        | 1.121         | 1.129         | 1.054         | P61204       | ARF3      | ADP-ribosylation factor 3                           |
| 0.948           | 0.951        | 0.950        | 0.991        | 0.713        | 1.123        | 1.116        | 1.123        | 0.932        | 1.055         | 1.057         | 1.101         | P18085       | ARF4      | ADP-ribosylation factor 4                           |
| 0.948           | 0.975        | 0.987        | 1.007        | 0.809        | 1.124        | 1.018        | 1.104        | 0.976        | 1.058         | 1.068         | 1.059         | P84085       | ARF5      | ADP-ribosylation factor 5                           |
| 1.028           | 1.038        | 1.029        | 1.003        | 0.854        | 1.079        | 1.048        | 1.128        | 1.016        | 1.183         | 1.065         | 1.055         | P62330       | ARF6      | ADP-ribosylation factor 6                           |
| 0.987           | 0.998        | 1.001        | 0.951        | 0.940        | 0.978        | 0.941        | 0.926        | 1.037        | 1.018         | 0.993         | 1.055         | Q8N6T3       | ARFGAP1   | ADP-ribosylation factor GTPase-activating protein 1 |
| 1.023           | 0.995        | 1.048        | 1.037        | 1.009        | 1.035        | 1.039        | 1.014        | 1.015        | 1.064         | 1.037         | 1.089         | Q8N6H7       | ARFGAP2   | ADP-ribosylation factor GTPase-activating protein 2 |

| Abundance Ratio |              |              |              |              |              |              |              |              |               |               |               | Accession ID | Gene name | Protein Description                                          |
|-----------------|--------------|--------------|--------------|--------------|--------------|--------------|--------------|--------------|---------------|---------------|---------------|--------------|-----------|--------------------------------------------------------------|
| 1 d<br>M1/C1    | 1 d<br>M2/C2 | 1 d<br>M3/C3 | 4 d<br>M1/C1 | 4 d<br>M2/C2 | 4 d<br>M3/C3 | 7 d<br>M1/C1 | 7 d<br>M2/C2 | 7 d<br>M3/C3 | 10 d<br>M1/C1 | 10 d<br>M2/C2 | 10 d<br>M3/C3 |              |           |                                                              |
| 1.037           | 0.996        | 1.018        | 0.967        | 1.011        | 0.983        | 1.001        | 0.914        | 0.983        | 1.046         | 0.995         | 1.026         | Q9NP61       | ARFGAP3   | ADP-ribosylation factor GTPase-activating protein 3          |
| 1.070           | 1.026        | 1.052        | 0.986        | 0.968        | 1.073        | 1.027        | 1.085        | 1.067        | 1.023         | 1.014         | 1.043         | Q9UJY5       | GGA1      | ADP-ribosylation factor-binding protein GGA1                 |
| 1.055           | 1.033        | 0.999        | 1.072        | 1.023        | 1.044        | 1.066        | 1.027        | 1.009        | 1.087         | 1.037         | 1.067         | Q9UJY4       | GGA2      | ADP-ribosylation factor-binding protein GGA2                 |
| 1.097           | 0.977        | 1.009        | 1.007        | 0.973        | 0.962        | 0.982        | 1.013        | 0.999        | 1.076         | 1.025         | 1.098         | Q9NZ52       | GGA3      | ADP-ribosylation factor-binding protein GGA3                 |
| 0.944           | 1.025        | 0.933        | 0.950        | 0.818        | 1.068        | 0.988        | 1.075        | 1.037        | 1.056         | 1.052         | 1.077         | P40616       | ARL1      | ADP-ribosylation factor-like protein 1                       |
| 1.060           | 0.926        | 0.933        |              |              |              |              |              |              |               |               |               | Q3SXY8       | ARL13B    | ADP-ribosylation factor-like protein 13B                     |
| 0.941           | 0.968        | 1.053        | 1.019        | 0.963        | 0.994        | 0.970        | 0.983        | 0.974        | 0.957         | 0.899         | 1.007         | A0A087WUW9   | ARL15     | ADP-ribosylation factor-like protein 15                      |
| 1.002           | 1.004        | 0.987        | 0.986        | 0.965        | 1.007        | 0.990        | 1.085        | 1.010        | 1.005         | 0.994         | 1.014         | P36404       | ARL2      | ADP-ribosylation factor-like protein 2                       |
| 0.982           | 1.030        | 1.008        | 0.989        | 1.080        | 0.984        | 1.013        | 1.061        | 1.009        | 0.981         | 1.020         | 0.955         | Q9Y2Y0       | ARL2BP    | ADP-ribosylation factor-like protein 2-binding protein       |
| 1.038           | 0.997        | 0.986        | 0.993        | 1.022        | 0.997        | 1.012        | 1.053        | 1.034        | 0.973         | 1.029         | 1.002         | P36405       | ARL3      | ADP-ribosylation factor-like protein 3                       |
|                 |              |              |              |              |              | 0.754        | 1.154        | 1.273        |               |               |               | Q9Y689       | ARL5A     | ADP-ribosylation factor-like protein 5A                      |
| 1.009           | 0.996        | 0.999        | 1.002        | 0.911        | 0.972        | 0.993        | 1.136        | 1.006        | 0.923         | 1.056         | 0.933         | Q96KC2       | ARL5B     | ADP-ribosylation factor-like protein 5B                      |
| 1.051           | 1.038        | 1.100        | 0.918        | 0.920        | 1.042        | 0.796        | 1.084        | 0.983        | 0.877         | 0.924         | 1.033         | Q9H0F7       | ARL6      | ADP-ribosylation factor-like protein 6                       |
|                 |              |              | 0.943        | 0.878        | 1.038        | 1.078        | 1.153        | 0.854        | 0.996         | 1.178         | 1.087         | Q8N6S5       | ARL6IP6   | ADP-ribosylation factor-like protein 6-interacting protein 6 |
| 1.033           | 0.949        | 1.040        | 0.999        | 0.865        | 1.119        | 1.040        | 1.087        | 1.006        | 1.028         | 1.024         | 0.971         | Q96BM9       | ARL8A     | ADP-ribosylation factor-like protein 8A                      |
| 1.012           | 1.000        | 0.988        | 1.027        | 0.877        | 1.074        | 1.055        | 1.040        | 1.013        | 0.970         | 1.051         | 0.974         | Q9NVJ2       | ARL8B     | ADP-ribosylation factor-like protein 8B                      |
| 1.013           | 0.980        | 1.057        | 0.986        | 0.901        | 1.025        | 1.027        | 0.984        | 0.954        | 1.106         | 1.004         | 1.037         | Q13795       | ARFRP1    | ADP-ribosylation factor-related protein 1                    |
| 1.037           | 1.017        | 0.982        | 1.009        | 1.035        | 0.991        | 1.035        | 1.065        | 1.008        | 1.027         | 0.978         | 1.015         | A6NFX8       | NUDT5     | ADP-sugar pyrophosphatase                                    |
| 1.044           | 0.975        | 1.023        |              |              |              | 1.084        | 1.176        | 1.132        | 1.138         | 0.981         | 1.067         | Q96AP0       | ACD       | Adrenocortical dysplasia protein homolog                     |
| 1.039           | 1.025        | 1.075        | 1.131        | 1.170        | 1.081        | 1.094        | 1.016        | 1.031        | 1.079         | 1.025         | 1.104         | P10109       | FDX1      | Adrenodoxin, mitochondrial                                   |
| 0.986           | 1.081        | 0.996        |              |              |              |              |              |              |               |               |               | Q9Y6U3       | SCIN      | Adseverin                                                    |
| 0.984           | 0.979        | 1.026        | 0.932        | 0.905        | 0.938        | 0.955        | 0.945        | 0.999        | 0.974         | 0.942         | 1.083         | Q9UHB7       | AFF4      | AF4/FMR2 family member 4                                     |
|                 |              |              |              |              |              | 1.093        | 1.066        | 1.041        |               |               |               | Q9Y2D8       | SSX2IP    | Afadin- and alpha-actinin-binding protein                    |
| 0.958           | 0.976        | 1.001        | 0.981        | 0.868        | 1.010        | 1.011        | 1.031        | 0.995        | 1.049         | 1.016         | 0.996         | Q9Y4W6       | AFG3L2    | AFG3-like protein 2                                          |
| 1.064           | 1.020        | 0.987        | 1.000        | 1.009        | 0.989        | 0.991        | 1.038        | 0.977        | 1.014         | 0.986         | 1.006         | O43488       | AKR7A2    | Aflatoxin B1 aldehyde reductase member 2                     |
| 0.989           | 0.918        | 1.006        | 1.001        | 0.929        | 1.016        | 0.945        | 1.031        | 0.993        | 1.042         | 1.016         | 1.079         | Q6ULP2       | AFTPH     | Aftiphilin                                                   |
| 1.003           | 1.018        | 1.003        | 0.975        | 0.966        | 1.007        | 0.981        | 0.976        | 0.981        | 0.973         | 0.985         | 1.014         | O00170       | AIP       | AH receptor-interacting protein                              |
| 1.043           | 1.010        | 1.057        | 1.023        | 0.982        | 1.021        | 1.045        | 1.069        | 1.005        | 1.041         | 1.008         | 1.072         | Q92667       | AKAP1     | A-kinase anchor protein 1, mitochondrial                     |
| 0.995           | 0.938        | 1.082        | 0.967        | 0.980        | 1.030        | 1.019        | 0.955        | 1.035        | 1.017         | 0.996         | 1.114         | O43572       | AKAP10    | A-kinase anchor protein 10, mitochondrial                    |
| 0.928           | 0.978        | 0.980        | 0.941        | 0.977        | 0.936        | 0.997        | 0.896        | 0.981        | 0.992         | 0.988         | 1.044         | Q02952       | AKAP12    | A-kinase anchor protein 12                                   |
| 0.987           | 1.006        | 1.051        | 0.962        | 0.934        | 1.071        | 0.980        | 1.020        | 1.016        | 1.032         | 0.983         | 1.130         | Q02040       | AKAP17A   | A-kinase anchor protein 17A                                  |
| 0.986           | 0.957        | 0.991        | 0.958        | 0.882        | 1.019        | 0.953        | 0.951        | 1.027        | 1.043         | 0.983         | 1.080         | O43823       | AKAP8     | A-kinase anchor protein 8                                    |

| Abundance Ratio |              |              |              |              |              |              |              |              |               |               |               | Accession ID | Gene name | Protein Description                                                     |
|-----------------|--------------|--------------|--------------|--------------|--------------|--------------|--------------|--------------|---------------|---------------|---------------|--------------|-----------|-------------------------------------------------------------------------|
| 1 d<br>M1/C1    | 1 d<br>M2/C2 | 1 d<br>M3/C3 | 4 d<br>M1/C1 | 4 d<br>M2/C2 | 4 d<br>M3/C3 | 7 d<br>M1/C1 | 7 d<br>M2/C2 | 7 d<br>M3/C3 | 10 d<br>M1/C1 | 10 d<br>M2/C2 | 10 d<br>M3/C3 |              |           |                                                                         |
| 0.959           | 1.005        | 1.013        | 1.016        | 1.044        | 1.017        | 1.023        | 0.860        | 0.985        | 1.012         | 1.029         | 1.030         | Q9ULX6       | AKAP8L    | A-kinase anchor protein 8-like                                          |
| 1.024           | 1.028        | 1.005        | 0.966        | 0.978        | 1.014        | 1.007        | 1.101        | 1.028        | 0.968         | 1.010         | 0.985         | Q9NRG9       | AAAS      | Aladin                                                                  |
| 0.970           | 0.885        | 1.071        | 0.934        | 0.982        | 0.951        | 1.082        | 1.000        | 1.015        | 0.966         | 0.985         | 1.133         | Q8TD30       | GPT2      | Alanine aminotransferase 2                                              |
| 0.985           | 1.011        | 0.992        | 1.012        | 1.036        | 1.009        | 0.994        | 1.030        | 1.009        | 0.962         | 1.006         | 0.987         | P49588       | AARS      | Alanine--tRNA ligase, cytoplasmic                                       |
| 0.976           | 0.986        | 1.042        | 0.995        | 0.978        | 1.039        | 1.019        | 1.007        | 1.015        | 1.056         | 0.987         | 1.090         | Q5J TZ9      | AARS2     | Alanine--tRNA ligase, mitochondrial                                     |
| 0.946           | 1.002        | 0.990        | 0.971        | 0.994        | 0.965        | 0.976        | 0.989        | 0.982        | 0.979         | 0.970         | 0.996         | P14550       | AKR1A1    | Alcohol dehydrogenase [NADP(+)]                                         |
| 0.989           | 0.993        | 0.998        | 0.977        | 1.054        | 0.998        | 1.028        | 0.967        | 1.022        | 0.962         | 0.961         | 0.956         | P11766       | ADH5      | Alcohol dehydrogenase class-3                                           |
| 0.981           | 1.026        | 1.028        | 1.002        | 1.033        | 0.977        | 1.052        | 1.034        | 1.011        | 0.936         | 0.893         | 1.033         | P47895       | ALDH1A3   | Aldehyde dehydrogenase family 1 member A3                               |
| 0.996           | 0.994        | 1.057        | 1.057        | 1.018        | 1.048        | 1.062        | 0.997        | 0.993        | 1.063         | 1.003         | 1.090         | Q8IZ83       | ALDH16A1  | Aldehyde dehydrogenase family 16 member A1                              |
| 0.999           | 1.005        | 1.003        | 0.976        | 0.983        | 0.984        | 0.958        | 1.001        | 0.996        | 0.974         | 0.955         | 0.986         | P30837       | ALDH1B1   | Aldehyde dehydrogenase X, mitochondrial                                 |
| 1.006           | 0.918        | 1.056        | 0.986        | 1.010        | 0.991        | 1.072        | 1.105        | 0.964        |               |               |               | P05091       | ALDH2     | Aldehyde dehydrogenase, mitochondrial                                   |
| 1.072           | 1.102        | 1.129        | 1.072        | 1.013        | 1.091        | 1.067        | 1.043        | 1.022        | 0.966         | 0.945         | 1.168         | Q06278       | AOX1      | Aldehyde oxidase                                                        |
|                 |              |              |              |              |              | 1.114        | 1.153        | 0.861        | 0.896         | 1.019         | 1.154         | A0A0A0MSS8   | AKR1C3    | Aldo-keto reductase family 1 member C3                                  |
| 0.972           | 0.989        | 0.993        | 1.014        | 0.935        | 1.012        | 0.976        | 0.992        | 0.959        | 1.059         | 0.928         | 0.991         | Q96C23       | GALM      | Aldose 1-epimerase                                                      |
| 0.968           | 1.006        | 1.000        | 0.977        | 1.094        | 0.886        | 0.951        | 0.856        | 0.948        | 0.979         | 0.785         | 0.999         | P15121       | AKR1B1    | Aldose reductase                                                        |
| 0.991           | 1.002        | 1.020        | 1.012        | 1.032        | 0.991        | 1.059        | 1.000        | 0.995        | 1.032         | 1.017         | 1.017         | O00116       | AGPS      | Alkyldihydroxyacetonephosphate synthase, peroxisomal                    |
| 0.948           | 1.015        | 1.049        | 1.012        | 0.936        | 0.950        | 1.025        | 1.011        | 0.966        | 1.122         | 1.014         | 1.139         | Q6NUM9       | RETSAT    | All-trans-retinol 13,14-reductase                                       |
| 1.007           | 0.974        | 1.009        | 1.005        | 0.966        | 1.019        | 1.007        | 1.065        | 1.032        | 0.987         | 1.024         | 1.026         | Q6PD74       | AAGAB     | Alpha- and gamma-adaptin-binding protein p34                            |
| 1.183           | 0.821        | 1.066        | 0.929        | 0.936        | 0.974        | 0.937        | 1.066        | 1.117        | 0.984         | 0.954         | 0.948         | Q495W5       | FUT11     | Alpha-(1,3)-fucosyltransferase 11                                       |
| 0.991           | 1.078        | 1.044        | 0.952        | 0.946        | 0.923        | 0.961        | 1.039        | 0.930        | 0.972         | 0.973         | 1.028         | Q9BYC5       | FUT8      | Alpha-(1,6)-fucosyltransferase                                          |
| 0.982           | 0.959        | 1.092        | 1.012        | 0.957        | 1.002        | 1.021        | 1.026        | 1.020        | 1.059         | 0.996         | 1.026         | Q9H553       | ALG2      | Alpha-1,3/1,6-mannosyltransferase ALG2                                  |
| 0.909           | 0.918        | 0.900        | 0.932        | 0.858        | 1.063        | 1.069        | 1.108        | 0.991        | 1.375         | 1.054         | 1.216         | A2A2G4       | ALG6      | Alpha-1,3-glucosyltransferase                                           |
| 0.968           | 1.015        | 0.998        | 0.925        | 0.866        | 0.937        | 0.965        | 1.049        | 0.964        | 0.999         | 0.970         | 1.037         | P26572       | MGAT1     | Alpha-1,3-mannosyl-glycoprotein 2-beta-N-acetylglucosaminyltransferase  |
| 1.007           | 0.960        | 0.994        | 0.961        | 1.001        | 0.943        | 0.888        | 1.103        | 0.910        | 0.968         | 0.971         | 0.922         | Q10469       | MGAT2     | Alpha-1,6-mannosyl-glycoprotein 2-beta-N-acetylglucosaminyltransferase  |
| 0.856           | 1.077        | 1.133        |              |              |              |              |              |              | 0.874         | 1.148         | 1.097         | Q09328       | MGAT5     | Alpha-1,6-mannosylglycoprotein 6-beta-N-acetylglucosaminyltransferase A |
|                 |              |              |              |              |              |              |              |              | 1.127         | 1.017         | 0.985         | A0A024R6I7   | SERPINA1  | Alpha-1-antitrypsin                                                     |
| 1.035           | 1.002        | 1.046        | 0.989        | 0.959        | 1.064        | 0.993        | 1.071        | 1.074        | 1.049         | 1.062         | 1.061         | Q13424       | SNTA1     | Alpha-1-syntrophin                                                      |
| 1.018           | 0.985        | 1.010        | 0.964        | 0.957        | 1.014        | 0.955        | 1.006        | 0.971        | 0.973         | 0.994         | 0.936         | P30533       | LRPAP1    | Alpha-2-macroglobulin receptor-associated protein                       |
| 0.995           | 1.013        | 0.999        | 1.004        | 1.069        | 0.988        | 1.012        | 1.035        | 1.027        | 0.974         | 0.979         | 1.003         | P12814       | ACTN1     | Alpha-actinin-1                                                         |
| 0.886           | 0.934        | 1.003        | 1.039        | 0.909        | 1.068        | 1.127        | 1.058        | 1.054        | 1.008         | 0.974         | 0.899         | K7EJH8       | ACTN4     | Alpha-actinin-4 (Fragment)                                              |
| 0.960           | 1.009        | 0.984        | 0.995        | 0.981        | 0.961        | 0.989        | 1.028        | 0.983        | 0.980         | 1.000         | 0.996         | O43707       | ACTN4     | Alpha-actinin-4                                                         |



| Abundance Ratio |              |              |              |              |              |              |              |              |               |               |               | Accession ID | Gene name | Protein Description                                                     |
|-----------------|--------------|--------------|--------------|--------------|--------------|--------------|--------------|--------------|---------------|---------------|---------------|--------------|-----------|-------------------------------------------------------------------------|
| 1 d<br>M1/C1    | 1 d<br>M2/C2 | 1 d<br>M3/C3 | 4 d<br>M1/C1 | 4 d<br>M2/C2 | 4 d<br>M3/C3 | 7 d<br>M1/C1 | 7 d<br>M2/C2 | 7 d<br>M3/C3 | 10 d<br>M1/C1 | 10 d<br>M2/C2 | 10 d<br>M3/C3 |              |           |                                                                         |
| 1.000           | 1.017        | 1.003        | 1.006        | 0.985        | 1.001        | 1.010        | 1.040        | 1.006        | 1.017         | 0.986         | 1.002         | Q9UDR5       | AASS      | Alpha-aminoadipic semialdehyde synthase, mitochondrial                  |
| 1.067           | 1.013        | 0.962        | 1.016        | 0.929        | 0.996        | 1.019        | 1.037        | 1.008        | 1.020         | 0.935         | 1.045         | Q9UBT7       | CTNNAL1   | Alpha-catulin                                                           |
| 1.056           | 1.027        | 1.012        | 1.045        | 1.047        | 0.969        | 0.997        | 1.014        | 1.019        | 0.988         | 0.996         | 0.974         | P61163       | ACTR1A    | Alpha-centractin                                                        |
|                 |              |              | 0.995        | 0.879        | 0.962        | 1.051        | 1.131        | 0.938        | 0.826         | 0.873         | 0.942         | P02511       | CRYAB     | Alpha-crystallin B chain                                                |
| 0.978           | 1.009        | 0.972        | 0.984        | 0.971        | 0.982        | 1.034        | 0.985        | 0.976        | 1.029         | 1.020         | 1.005         | Q5T5H1       | ENSA      | Alpha-endosulfine                                                       |
| 1.039           | 0.983        | 0.987        | 1.027        | 0.982        | 0.979        | 0.975        | 0.990        | 1.012        | 0.966         | 0.973         | 0.942         | P06733       | ENO1      | Alpha-enolase                                                           |
| 0.999           | 0.995        | 0.984        | 1.041        | 0.997        | 1.023        | 1.070        | 1.080        | 1.033        | 1.133         | 1.091         | 1.055         | P06280       | GLA       | Alpha-galactosidase A                                                   |
| 1.043           | 1.002        | 1.021        | 1.029        | 0.955        | 1.010        | 1.011        | 1.034        | 1.044        | 0.980         | 0.982         | 1.007         | Q12800       | TFCP2     | Alpha-globin transcription factor CP2                                   |
|                 |              |              |              |              |              | 1.190        | 1.464        | 0.892        |               |               |               | Q96Q83       | ALKBH3    | Alpha-ketoglutarate-dependent dioxygenase alkB homolog 3                |
| 1.274           | 1.016        | 1.097        | 1.027        | 0.933        | 0.989        | 0.973        | 1.143        | 1.066        | 0.876         | 1.055         | 1.133         | Q9NXW9       | ALKBH4    | Alpha-ketoglutarate-dependent dioxygenase alkB homolog 4                |
| 1.454           | 0.782        | 0.736        | 0.994        | 0.767        | 0.941        |              |              |              | 1.272         | 0.815         | 1.118         | Q9BT30       | ALKBH7    | Alpha-ketoglutarate-dependent dioxygenase alkB homolog 7, mitochondrial |
| 0.985           | 0.991        | 1.004        | 1.005        | 1.034        | 1.012        | 1.023        | 1.014        | 1.001        | 1.008         | 0.985         | 1.001         | Q9C0B1       | FTO       | Alpha-ketoglutarate-dependent dioxygenase FTO                           |
| 0.693           | 0.790        | 1.126        | 0.997        | 0.960        | 0.978        | 0.884        | 1.152        | 1.057        | 1.103         | 1.060         | 1.048         | P35475       | IDUA      | Alpha-L-iduronidase                                                     |
| 0.964           | 1.001        | 1.007        | 0.934        | 0.905        | 0.978        | 0.941        | 1.062        | 0.994        | 0.966         | 0.977         | 0.983         | Q16706       | MAN2A1    | Alpha-mannosidase 2                                                     |
|                 |              |              |              |              |              | 0.967        | 1.209        | 0.862        | 1.056         | 0.892         | 0.964         | P49641       | MAN2A2    | Alpha-mannosidase 2x                                                    |
| 1.015           | 1.035        | 1.005        | 0.988        | 0.959        | 0.957        | 0.952        | 1.048        | 0.954        | 1.011         | 1.018         | 0.958         | P17050       | NAGA      | Alpha-N-acetylgalactosaminidase                                         |
| 1.005           | 0.893        | 1.003        | 0.975        | 0.994        | 1.031        | 0.941        | 1.036        | 1.032        | 1.033         | 0.970         | 1.005         | P54802       | NAGLU     | Alpha-N-acetylglucosaminidase                                           |
| 1.008           | 0.989        | 1.018        | 0.988        | 0.944        | 1.004        | 1.008        | 1.040        | 0.993        | 0.966         | 0.985         | 0.972         | J3KNQ4       | PARVA     | Alpha-parvin                                                            |
|                 |              |              |              |              |              | 0.790        | 1.250        | 1.204        | 1.008         | 1.055         | 0.855         | Q96QP1       | ALPK1     | Alpha-protein kinase 1                                                  |
| 1.025           | 1.000        | 1.005        | 1.027        | 1.050        | 1.011        | 1.033        | 1.002        | 1.001        | 0.992         | 1.013         | 1.005         | P54920       | NAPA      | Alpha-soluble NSF attachment protein                                    |
| 1.032           | 0.930        | 1.008        | 0.989        | 0.934        | 0.979        | 0.999        | 0.930        | 0.971        | 1.094         | 1.004         | 1.054         | P37840       | SNCA      | Alpha-synuclein                                                         |
| 0.976           | 1.000        | 1.014        | 1.010        | 0.962        | 1.023        | 1.015        | 0.971        | 1.014        | 1.061         | 1.017         | 1.082         | P40222       | TXLNA     | Alpha-taxilin                                                           |
| 1.025           | 0.985        | 0.994        | 0.980        | 0.959        | 0.985        | 0.981        | 1.129        | 1.087        | 0.941         | 0.985         | 1.085         | Q9BTX7       | TTPAL     | Alpha-tocopherol transfer protein-like                                  |
| 1.123           | 1.052        | 1.014        |              |              |              | 1.015        | 1.024        | 1.128        | 0.882         | 1.231         | 1.195         | Q60I27       | ALS2CL    | ALS2 C-terminal-like protein                                            |
| 1.091           | 0.936        | 1.066        | 0.994        | 0.896        | 1.006        | 0.929        | 1.017        | 0.960        | 0.934         | 1.021         | 1.020         | Q96Q42       | ALS2      | Alsin                                                                   |
| 1.032           | 0.960        | 1.033        | 0.924        | 0.937        | 1.012        | 1.001        | 1.027        | 1.035        | 0.957         | 0.970         | 1.152         | L0R819       | ASNSD1    | Alternative protein ASNSD1                                              |
| 0.945           | 0.956        | 1.015        | 0.974        | 1.051        | 1.011        | 0.969        | 0.975        | 0.993        | 1.017         | 1.049         | 1.009         | Q9HB66       | MKKS      | Alternative protein MKKS                                                |
|                 |              |              |              |              |              |              |              |              | 1.002         | 1.359         | 0.987         | L0R6P0       | RPP14     | Alternative protein RPP14                                               |
| 0.982           | 0.978        | 1.002        | 1.009        | 0.933        | 1.025        | 0.999        | 1.081        | 1.017        | 1.001         | 1.019         | 0.999         | Q06203       | PPAT      | Amidophosphoribosyltransferase                                          |
| 1.013           | 0.981        | 0.981        | 1.004        | 0.953        | 1.007        | 1.013        | 1.015        | 1.010        | 1.028         | 0.994         | 1.017         | P21397       | MAOA      | Amine oxidase [flavin-containing] A                                     |
|                 |              |              |              |              |              | 1.078        | 1.057        | 0.983        |               |               |               | F8W950       | AIMP2     | Aminoacyl tRNA synthase complex-interacting multifunctional protein 2   |

| Abundance Ratio |              |              |              |              |              |              |              |              |               |               |               | Accession ID | Gene name | Protein Description                                                   |
|-----------------|--------------|--------------|--------------|--------------|--------------|--------------|--------------|--------------|---------------|---------------|---------------|--------------|-----------|-----------------------------------------------------------------------|
| 1 d<br>M1/C1    | 1 d<br>M2/C2 | 1 d<br>M3/C3 | 4 d<br>M1/C1 | 4 d<br>M2/C2 | 4 d<br>M3/C3 | 7 d<br>M1/C1 | 7 d<br>M2/C2 | 7 d<br>M3/C3 | 10 d<br>M1/C1 | 10 d<br>M2/C2 | 10 d<br>M3/C3 |              |           |                                                                       |
| 1.005           | 1.010        | 0.991        | 1.004        | 1.107        | 0.989        | 0.994        | 0.982        | 1.007        | 1.000         | 1.001         | 0.975         | Q13155       | AIMP2     | Aminoacyl tRNA synthase complex-interacting multifunctional protein 2 |
| 1.009           | 0.995        | 1.015        | 1.018        | 1.017        | 1.023        | 1.008        | 1.024        | 1.008        | 0.986         | 0.994         | 0.979         | Q03154       | ACY1      | Aminoacylase-1                                                        |
| 1.019           | 1.003        | 0.993        | 1.006        | 1.018        | 0.985        | 0.988        | 1.028        | 0.987        | 1.012         | 0.978         | 0.988         | Q9H4A4       | RNPEP     | Aminopeptidase B                                                      |
| 1.082           | 0.960        | 0.846        | 1.116        | 0.987        | 0.927        | 1.034        | 1.036        | 1.005        | 1.051         | 1.422         | 0.829         | Q9HAU8       | RNPEPL1   | Aminopeptidase RNPEPL1                                                |
| 0.904           | 0.973        | 1.041        | 1.061        | 0.938        | 0.954        | 1.088        | 1.118        | 1.017        |               |               |               | K7ELE3       | AES       | Amino-terminal enhancer of split (Fragment)                           |
| 1.183           | 1.077        | 0.968        | 1.157        | 0.591        | 1.230        |              |              |              |               |               |               | Q6DCA0       | AMMECR1L  | AMMECR1-like protein                                                  |
| 1.008           | 0.993        | 1.023        | 0.982        | 0.971        | 1.011        | 0.996        | 1.006        | 1.004        | 0.994         | 0.989         | 1.000         | Q01433       | AMPD2     | AMP deaminase 2                                                       |
| 0.834           | 0.979        | 1.165        | 0.872        | 0.917        | 0.960        | 0.964        | 0.752        | 1.058        | 0.875         | 1.049         | 1.275         | O96018       | APBA3     | Amyloid beta A4 precursor protein-binding family A member 3           |
| 1.139           | 1.073        | 1.183        | 0.830        | 0.989        | 1.024        | 0.913        | 1.046        | 0.969        | 1.059         | 1.018         | 1.022         | J3KPL8       | APBB1     | Amyloid beta A4 precursor protein-binding family B member 1           |
| 0.947           | 0.985        | 0.984        | 0.960        | 0.913        | 0.941        | 0.990        | 0.926        | 0.938        | 1.058         | 0.910         | 1.048         | P05067       | APP       | Amyloid beta A4 protein                                               |
| 0.980           | 1.148        | 0.880        |              |              |              |              |              |              |               |               |               | Q92624       | APPBP2    | Amyloid protein-binding protein 2                                     |
| 1.026           | 0.760        | 0.984        | 1.068        | 0.838        | 1.024        | 1.042        | 0.873        | 0.952        | 1.207         | 0.736         | 1.124         | Q06481       | APLP2     | Amyloid-like protein 2                                                |
| 1.073           | 0.996        | 1.099        | 1.068        | 0.944        | 1.044        | 0.930        | 1.086        | 1.005        | 0.907         | 1.108         | 0.978         | Q8TCF1       | ZFAND1    | AN1-type zinc finger protein 1                                        |
| 0.979           | 0.915        | 1.067        | 0.981        | 1.252        | 1.042        | 1.188        | 0.967        | 1.018        | 0.971         | 0.987         | 1.078         | Q8WV99       | ZFAND2B   | AN1-type zinc finger protein 2B                                       |
| 1.055           | 1.023        | 1.027        | 1.031        | 0.900        | 1.017        |              |              |              | 0.962         | 1.022         | 1.101         | O76080       | ZFAND5    | AN1-type zinc finger protein 5                                        |
| 1.103           | 0.975        | 0.941        | 0.627        | 1.160        | 0.919        |              |              |              |               |               |               | Q6FIF0       | ZFAND6    | AN1-type zinc finger protein 6                                        |
| 1.000           | 1.006        | 1.036        | 0.967        | 0.957        | 0.987        | 0.973        | 0.920        | 0.954        | 0.982         | 1.001         | 0.998         | Q6FI81       | CIAPIN1   | Anamorsin                                                             |
| 1.003           | 1.033        | 1.028        | 1.003        | 0.942        | 1.039        | 0.983        | 1.024        | 0.967        | 0.973         | 0.993         | 1.032         | Q9H1A4       | ANAPC1    | Anaphase-promoting complex subunit 1                                  |
| 1.048           | 1.018        | 0.983        | 0.988        | 1.071        | 1.040        | 0.977        | 0.842        | 1.012        | 1.215         | 0.991         | 1.115         | Q9UM13       | ANAPC10   | Anaphase-promoting complex subunit 10                                 |
|                 |              |              |              |              |              |              |              |              | 1.055         | 1.027         | 1.000         | Q9NYG5       | ANAPC11   | Anaphase-promoting complex subunit 11                                 |
| 1.108           | 0.928        | 0.886        | 0.962        | 1.221        | 1.008        | 1.066        | 0.978        | 1.062        | 1.065         | 0.958         | 1.166         | Q9BS18       | ANAPC13   | Anaphase-promoting complex subunit 13                                 |
| 1.010           | 1.041        | 0.913        | 0.913        | 1.015        | 0.865        | 1.027        | 1.019        | 0.968        | 0.974         | 0.968         | 1.112         | Q96DE5       | ANAPC16   | Anaphase-promoting complex subunit 16                                 |
| 1.026           | 0.990        | 1.049        | 1.001        | 0.903        | 1.019        | 1.081        | 1.056        | 1.133        | 1.105         | 1.020         | 1.013         | Q9UJX6       | ANAPC2    | Anaphase-promoting complex subunit 2                                  |
| 1.034           | 0.985        | 1.014        | 1.016        | 0.938        | 1.090        | 0.983        | 1.123        | 1.037        | 1.017         | 1.030         | 1.060         | F5H0F9       | ANAPC5    | Anaphase-promoting complex subunit 5                                  |
| 1.022           | 0.997        | 0.996        | 1.068        | 1.009        | 0.982        | 1.061        | 1.092        | 1.051        | 1.069         | 0.993         | 1.067         | Q9UJX3       | ANAPC7    | Anaphase-promoting complex subunit 7                                  |
| 1.045           | 1.013        | 1.040        | 0.972        | 0.984        | 1.064        | 0.937        | 0.982        | 1.066        | 0.978         | 0.881         | 1.033         | Q8NHZ8       | CDC26     | Anaphase-promoting complex subunit CDC26                              |
| 0.988           | 1.022        | 1.017        | 0.994        | 0.935        | 1.001        | 1.008        | 1.004        | 0.989        | 1.010         | 1.028         | 1.041         | Q9Y679       | AUP1      | Ancient ubiquitous protein 1                                          |
| 0.984           | 0.967        | 0.988        | 0.957        | 0.934        | 1.001        | 0.997        | 1.046        | 0.994        | 0.957         | 0.935         | 1.027         | C9JEH3       | AAMP      | Angio-associated migratory cell protein                               |
| 0.989           | 1.032        | 1.153        | 0.832        | 1.064        | 0.999        | 0.735        | 0.878        | 1.051        | 1.202         | 0.858         | 1.268         | Q8IY63       | AMOTL1    | Angiomotin-like protein 1                                             |
| 0.997           | 1.004        | 0.976        | 0.938        | 0.964        | 0.988        | 0.934        | 1.024        | 0.952        | 0.923         | 0.932         | 0.884         | Q9BY76       | ANGPTL4   | Angiopoietin-related protein 4                                        |
| 0.953           | 1.013        | 1.027        | 0.969        | 0.929        | 1.027        | 1.045        | 0.988        | 0.997        | 0.884         | 0.873         | 1.050         | Q9NQW6       | ANLN      | Anillin                                                               |
| 0.997           | 1.032        | 0.948        | 0.975        | 0.803        | 0.991        | 1.190        | 1.047        | 1.144        | 0.991         | 0.770         | 0.896         | P04920       | SLC4A2    | Anion exchange protein 2                                              |

| Abundance Ratio |              |              |              |              |              |              |              |              |               |               |               | Accession ID | Gene name | Protein Description                                          |
|-----------------|--------------|--------------|--------------|--------------|--------------|--------------|--------------|--------------|---------------|---------------|---------------|--------------|-----------|--------------------------------------------------------------|
| 1 d<br>M1/C1    | 1 d<br>M2/C2 | 1 d<br>M3/C3 | 4 d<br>M1/C1 | 4 d<br>M2/C2 | 4 d<br>M3/C3 | 7 d<br>M1/C1 | 7 d<br>M2/C2 | 7 d<br>M3/C3 | 10 d<br>M1/C1 | 10 d<br>M2/C2 | 10 d<br>M3/C3 |              |           |                                                              |
| 1.019           | 0.974        | 1.040        | 1.016        | 0.932        | 1.135        | 0.965        | 0.909        | 1.055        | 1.052         | 1.017         | 1.120         | Q969K4       | ABTB1     | Ankyrin repeat and BTB/POZ domain-containing protein 1       |
| 1.080           | 1.074        | 1.041        | 0.972        | 0.956        | 1.010        | 1.001        | 1.042        | 1.040        | 0.928         | 0.929         | 1.027         | Q8N961       | ABTB2     | Ankyrin repeat and BTB/POZ domain-containing protein 2       |
| 1.033           | 1.058        | 1.130        | 1.046        | 1.062        | 1.111        | 1.228        | 1.079        | 1.118        | 1.167         | 1.034         | 1.159         | Q495B1       | ANKDD1A   | Ankyrin repeat and death domain-containing protein 1A        |
| 1.094           | 0.868        | 1.031        | 1.147        | 0.898        | 0.951        | 1.099        | 0.972        | 1.016        | 1.093         | 0.923         | 1.021         | Q9P2G1       | ANKIB1    | Ankyrin repeat and IBR domain-containing protein 1           |
| 0.898           | 0.886        | 0.999        |              |              |              | 1.085        | 1.015        | 1.080        | 0.942         | 1.027         | 1.131         | E9PDP5       | ANKHD1    | Ankyrin repeat and KH domain-containing protein 1 (Fragment) |
| 1.006           | 1.003        | 1.008        | 0.963        | 0.928        | 1.007        | 1.029        | 1.012        | 1.008        | 1.026         | 0.967         | 1.074         | Q86XL3       | ANKLE2    | Ankyrin repeat and LEM domain-containing protein 2           |
| 1.032           | 1.022        | 0.998        | 1.025        | 1.021        | 1.016        | 1.058        | 1.061        | 1.158        | 1.005         | 0.978         | 1.065         | Q8IV38       | ANKMY2    | Ankyrin repeat and MYND domain-containing protein 2          |
| 1.028           | 0.994        | 1.028        | 1.001        | 0.976        | 1.034        | 1.025        | 1.059        | 1.034        | 0.972         | 0.977         | 1.050         | Q92625       | ANKS1A    | Ankyrin repeat and SAM domain-containing protein 1A          |
| 1.037           | 0.991        | 1.278        | 0.873        | 1.010        | 1.011        | 0.970        | 1.013        | 0.968        | 1.073         | 1.019         | 1.086         | Q6ZW76       | ANKS3     | Ankyrin repeat and SAM domain-containing protein 3           |
|                 |              |              |              |              |              | 1.226        | 1.171        | 0.949        | 0.983         | 1.039         | 1.106         | Q9Y576       | ASB1      | Ankyrin repeat and SOCS box protein 1                        |
|                 |              |              | 1.189        | 0.981        | 1.284        | 0.937        | 1.194        | 1.172        | 1.073         | 0.717         | 0.956         | Q9NWX5       | ASB6      | Ankyrin repeat and SOCS box protein 6                        |
| 1.038           | 1.016        | 1.038        | 0.972        | 0.958        | 1.015        | 0.981        | 1.014        | 0.964        | 0.986         | 0.973         | 1.046         | Q9H8Y5       | ANKZF1    | Ankyrin repeat and zinc finger domain-containing protein 1   |
|                 |              |              |              |              |              |              |              |              | 0.967         | 1.023         | 1.102         | Q9NXR5       | ANKRD10   | Ankyrin repeat domain-containing protein 10                  |
| 0.929           | 0.934        | 1.054        | 0.936        | 1.016        | 1.089        | 0.934        | 0.929        | 0.793        |               |               |               | Q6UB99       | ANKRD11   | Ankyrin repeat domain-containing protein 11                  |
| 0.985           | 1.038        | 1.011        | 0.983        | 1.021        | 0.970        | 0.961        | 1.148        | 1.014        | 1.029         | 0.999         | 1.008         | Q8IZ07       | ANKRD13A  | Ankyrin repeat domain-containing protein 13A                 |
| 1.114           | 0.996        | 0.964        | 1.091        | 0.884        | 0.972        | 1.089        | 1.175        | 0.937        | 0.941         | 0.943         | 0.998         | Q6P6B7       | ANKRD16   | Ankyrin repeat domain-containing protein 16                  |
| 1.021           | 0.994        | 1.069        | 0.995        | 0.957        | 1.026        | 0.992        | 1.040        | 1.026        | 1.015         | 0.993         | 1.030         | O75179       | ANKRD17   | Ankyrin repeat domain-containing protein 17                  |
|                 |              |              | 0.925        | 1.043        | 0.925        | 0.962        | 1.197        | 1.011        | 1.034         | 0.958         | 1.057         | Q96NW4       | ANKRD27   | Ankyrin repeat domain-containing protein 27                  |
|                 |              |              | 1.077        | 0.972        | 1.190        | 0.942        | 0.966        | 1.148        |               |               |               | Q8N283       | ANKRD35   | Ankyrin repeat domain-containing protein 35                  |
|                 |              |              |              |              |              |              |              |              | 1.047         | 0.967         | 0.913         | Q6AI12       | ANKRD40   | Ankyrin repeat domain-containing protein 40                  |
|                 |              |              | 0.998        | 0.945        | 0.869        |              |              |              |               |               |               | Q8WVL7       | ANKRD49   | Ankyrin repeat domain-containing protein 49                  |
| 1.075           | 1.189        | 0.999        | 0.988        | 0.958        | 0.960        | 0.967        | 1.133        | 1.022        | 1.051         | 0.955         | 0.964         | Q9ULJ7       | ANKRD50   | Ankyrin repeat domain-containing protein 50                  |
| 1.098           | 0.952        | 0.877        | 1.008        | 0.994        | 0.973        | 1.021        | 0.884        | 1.010        | 1.066         | 1.015         | 1.115         | Q6NXT1       | ANKRD54   | Ankyrin repeat domain-containing protein 54                  |
|                 |              |              |              |              |              |              |              |              | 1.166         | 1.084         | 1.211         | B4E2M5       | ANKRD66   | Ankyrin repeat domain-containing protein 66                  |
| 0.989           | 1.004        | 1.023        | 0.964        | 0.963        | 0.969        | 1.074        | 1.023        | 0.973        | 1.057         | 1.065         | 1.050         | Q53LP3       | SOWAHC    | Ankyrin repeat domain-containing protein SOWAHC              |
| 1.027           | 0.985        | 1.038        | 1.010        | 0.971        | 1.039        | 1.012        | 0.978        | 1.052        | 1.075         | 1.006         | 1.036         | Q01484       | ANK2      | Ankyrin-2                                                    |
|                 |              |              | 1.131        | 1.279        | 1.133        | 0.958        | 1.107        | 0.931        |               |               |               | HOYL33       | ANXA2     | Annexin (Fragment)                                           |

| Abundance Ratio |              |              |              |              |              |              |              |              |               |               |               | Accession ID | Gene name | Protein Description                        |
|-----------------|--------------|--------------|--------------|--------------|--------------|--------------|--------------|--------------|---------------|---------------|---------------|--------------|-----------|--------------------------------------------|
| 1 d<br>M1/C1    | 1 d<br>M2/C2 | 1 d<br>M3/C3 | 4 d<br>M1/C1 | 4 d<br>M2/C2 | 4 d<br>M3/C3 | 7 d<br>M1/C1 | 7 d<br>M2/C2 | 7 d<br>M3/C3 | 10 d<br>M1/C1 | 10 d<br>M2/C2 | 10 d<br>M3/C3 |              |           |                                            |
| 1.035           | 1.021        | 1.013        | 1.002        | 1.066        | 1.031        | 0.998        | 1.075        | 1.045        | 0.963         | 1.020         | 0.997         | P04083       | ANXA1     | Annexin A1                                 |
| 1.024           | 0.994        | 0.976        | 0.977        | 1.054        | 0.968        | 0.967        | 0.972        | 1.014        | 0.972         | 1.014         | 0.964         | P50995       | ANXA11    | Annexin A11                                |
| 1.017           | 1.011        | 0.993        | 0.998        | 0.996        | 0.965        | 1.019        | 0.995        | 0.999        | 1.002         | 0.940         | 1.004         | P12429       | ANXA3     | Annexin A3                                 |
| 1.043           | 1.001        | 0.992        | 0.986        | 0.988        | 0.962        | 1.000        | 0.954        | 0.962        | 1.012         | 0.954         | 0.990         | P09525       | ANXA4     | Annexin A4                                 |
| 1.016           | 0.999        | 1.012        | 1.010        | 0.992        | 1.002        | 0.967        | 0.969        | 0.998        | 0.963         | 0.995         | 0.969         | P08758       | ANXA5     | Annexin A5                                 |
| 0.981           | 0.981        | 0.992        | 0.984        | 1.015        | 0.992        | 1.000        | 0.935        | 0.989        | 1.017         | 0.987         | 0.993         | P08133       | ANXA6     | Annexin A6                                 |
| 0.970           | 1.007        | 1.000        | 1.009        | 1.051        | 0.998        | 1.024        | 0.965        | 0.999        | 0.999         | 0.998         | 0.999         | P20073       | ANXA7     | Annexin A7                                 |
| 0.830           | 0.831        | 1.072        | 0.974        | 0.996        | 1.053        | 1.023        | 1.037        | 1.015        | 1.219         | 1.029         | 1.346         | E5RK69       | ANXA6     | Annexin                                    |
| 0.952           | 0.953        | 1.075        | 0.980        | 0.970        | 0.977        | 1.006        | 1.029        | 1.022        | 1.082         | 0.977         | 1.074         | Q9NW15       | ANO10     | Anoctamin-10                               |
| 1.079           | 1.090        | 1.125        | 1.119        | 0.965        | 0.996        | 1.205        | 1.101        | 0.987        | 1.189         | 1.095         | 1.236         | Q9H6X2       | ANTXR1    | Anthrax toxin receptor 1                   |
| 1.231           | 1.171        | 1.213        |              |              |              |              |              |              |               |               |               | P58335       | ANTXR2    | Anthrax toxin receptor 2                   |
| 0.973           | 1.042        | 1.005        | 0.963        | 0.920        | 1.009        | 0.981        | 1.053        | 0.995        | 1.022         | 1.009         | 0.968         | A0A140T9T7   | TAP1      | Antigen peptide transporter 1              |
| 0.961           | 1.037        | 1.046        | 0.962        | 0.921        | 0.944        | 0.956        | 0.989        | 0.964        | 0.988         | 1.023         | 1.004         | X5CMH5       | TAP2      | Antigen peptide transporter 2              |
|                 |              |              |              |              |              |              |              |              | 1.066         | 1.042         | 1.225         | P03973       | SLPI      | Antileukoproteinase                        |
| 0.993           | 1.027        | 1.018        | 1.007        | 1.020        | 0.993        | 0.993        | 1.045        | 1.030        | 0.955         | 1.000         | 0.978         | Q10567       | AP1B1     | AP-1 complex subunit beta-1                |
| 0.957           | 1.050        | 1.038        | 0.908        | 0.935        | 1.144        | 0.845        | 0.938        | 1.008        | 0.993         | 0.925         | 1.087         | O75843       | AP1G2     | AP-1 complex subunit gamma-like 2          |
| 1.017           | 1.004        | 1.000        | 0.988        | 0.975        | 0.999        | 0.954        | 0.996        | 1.000        | 0.967         | 0.989         | 0.996         | Q9BXS5       | AP1M1     | AP-1 complex subunit mu-1                  |
| 1.006           | 0.979        | 0.979        | 0.995        | 0.892        | 1.019        | 1.023        | 1.044        | 1.028        | 0.878         | 0.947         | 0.935         | P61966       | AP1S1     | AP-1 complex subunit sigma-1A              |
| 1.042           | 0.883        | 1.044        | 0.989        | 0.867        | 1.037        | 0.924        | 1.018        | 1.018        | 0.986         | 0.919         | 0.970         | P56377       | AP1S2     | AP-1 complex subunit sigma-2               |
|                 |              |              | 0.920        | 0.833        | 1.132        | 1.043        | 1.077        | 0.941        | 0.531         | 1.047         | 0.995         | Q63HQ0       | AP1AR     | AP-1 complex-associated regulatory protein |
| 0.998           | 1.018        | 0.995        | 1.000        | 0.993        | 1.020        | 1.014        | 1.044        | 1.012        | 1.009         | 0.993         | 1.006         | O95782       | AP2A1     | AP-2 complex subunit alpha-1               |
| 0.961           | 1.008        | 0.982        | 0.985        | 0.992        | 0.993        | 0.987        | 1.044        | 1.006        | 1.001         | 1.006         | 0.995         | O94973       | AP2A2     | AP-2 complex subunit alpha-2               |
| 1.050           | 1.000        | 1.033        | 0.991        | 0.980        | 0.995        | 0.978        | 1.041        | 0.969        | 0.957         | 0.996         | 0.940         | Q96CW1       | AP2M1     | AP-2 complex subunit mu                    |
| 0.947           | 1.003        | 0.972        | 0.985        | 0.911        | 1.057        | 1.031        | 1.080        | 1.029        | 0.946         | 0.987         | 0.960         | M0QYZ2       | AP2S1     | AP-2 complex subunit sigma                 |
| 0.971           | 0.969        | 1.029        | 0.986        | 0.964        | 1.025        | 1.001        | 1.015        | 0.974        | 0.983         | 0.995         | 1.057         | A0A096LP25   | AAK1      | AP2-associated protein kinase 1 (Fragment) |
| 0.997           | 1.013        | 1.005        | 0.999        | 0.972        | 1.009        | 1.023        | 1.053        | 1.030        | 1.001         | 1.004         | 1.030         | Q2M2I8       | AAK1      | AP2-associated protein kinase 1            |
| 1.012           | 1.009        | 1.004        | 1.009        | 0.969        | 1.003        | 1.012        | 1.027        | 0.997        | 1.024         | 1.001         | 1.015         | O00203       | AP3B1     | AP-3 complex subunit beta-1                |
| 1.032           | 1.018        | 1.018        | 1.009        | 0.969        | 0.992        | 1.020        | 1.129        | 1.030        | 1.042         | 1.019         | 1.043         | Q9Y2T2       | AP3M1     | AP-3 complex subunit mu-1                  |
| 0.913           | 0.917        | 0.973        | 1.022        | 0.955        | 1.091        | 0.871        | 1.139        | 1.081        |               |               |               | P53677       | AP3M2     | AP-3 complex subunit mu-2                  |
| 1.021           | 0.989        | 1.004        | 1.020        | 0.982        | 1.029        | 1.059        | 1.091        | 1.057        | 0.999         | 1.002         | 0.988         | Q92572       | AP3S1     | AP-3 complex subunit sigma-1               |
| 1.092           | 1.152        | 1.303        | 1.092        | 0.926        | 1.065        | 0.982        | 1.173        | 1.021        | 0.802         | 1.022         | 1.093         | A0A1B0GV70   | TEPSIN    | AP-4 complex accessory subunit Tepsin      |
| 0.946           | 1.048        | 1.064        | 0.965        | 0.982        | 0.871        | 0.998        | 1.039        | 0.930        | 0.977         | 0.971         | 1.025         | Q9Y6B7       | AP4B1     | AP-4 complex subunit beta-1                |
| 1.032           | 1.102        | 1.082        | 0.984        | 0.942        | 0.990        | 0.935        | 1.072        | 1.006        | 0.956         | 0.996         | 0.944         | Q9UPM8       | AP4E1     | AP-4 complex subunit epsilon-1             |
| 1.362           | 1.384        | 1.051        |              |              |              |              |              |              | 1.605         | 0.936         | 0.816         | C9JC87       | AP4M1     | AP-4 complex subunit mu-1                  |

| Abundance Ratio |              |              |              |              |              |              |              |              |               |               |               | Accession ID | Gene name | Protein Description                                                     |
|-----------------|--------------|--------------|--------------|--------------|--------------|--------------|--------------|--------------|---------------|---------------|---------------|--------------|-----------|-------------------------------------------------------------------------|
| 1 d<br>M1/C1    | 1 d<br>M2/C2 | 1 d<br>M3/C3 | 4 d<br>M1/C1 | 4 d<br>M2/C2 | 4 d<br>M3/C3 | 7 d<br>M1/C1 | 7 d<br>M2/C2 | 7 d<br>M3/C3 | 10 d<br>M1/C1 | 10 d<br>M2/C2 | 10 d<br>M3/C3 |              |           |                                                                         |
|                 |              |              |              |              |              | 1.158        | 1.051        | 0.977        |               |               |               | Q9Y587       | AP4S1     | AP-4 complex subunit sigma-1                                            |
| 0.880           | 1.028        | 1.016        | 0.934        | 0.934        | 0.999        | 1.073        | 0.993        | 1.056        | 0.868         | 0.831         | 1.059         | Q2VPB7       | AP5B1     | AP-5 complex subunit beta-1                                             |
| 1.027           | 1.074        | 0.907        | 0.888        | 0.963        | 1.049        | 0.791        | 1.237        | 1.013        | 0.808         | 0.928         | 0.784         | E7EQ45       | AP5M1     | AP-5 complex subunit mu-1                                               |
| 0.962           | 0.940        | 1.071        | 0.924        | 0.851        | 0.985        | 0.916        | 1.262        | 1.050        | 0.953         | 0.973         | 0.959         | Q9NUS5       | AP5S1     | AP-5 complex subunit sigma-1                                            |
| 1.054           | 1.018        | 1.041        | 0.997        | 0.856        | 1.018        | 0.985        | 1.140        | 1.031        | 1.055         | 1.021         | 1.107         | O43299       | AP5Z1     | AP-5 complex subunit zeta-1                                             |
|                 |              |              | 1.059        | 1.382        | 1.414        | 1.488        | 1.018        | 1.549        |               |               |               | K7EPF9       | APOC1     | Apolipoprotein C-I                                                      |
| 1.028           | 1.032        | 1.072        | 0.808        | 0.893        | 1.217        |              |              |              |               |               |               | B0YIW2       | APOC3     | Apolipoprotein C-III                                                    |
| 1.010           | 1.020        | 1.043        | 1.014        | 1.000        | 1.030        | 1.058        | 0.939        | 0.978        | 1.078         | 0.989         | 1.121         | J3KQL8       | APOL2     | Apolipoprotein L2                                                       |
| 1.016           | 1.002        | 0.994        | 0.991        | 0.951        | 1.020        | 0.976        | 1.049        | 1.012        | 0.944         | 1.001         | 0.942         | Q9BZZ5       | API5      | Apoptosis inhibitor 5                                                   |
|                 |              |              | 0.882        | 0.886        | 1.044        |              |              |              | 1.036         | 0.908         | 1.157         | Q9ULZ3       | PYCARD    | Apoptosis-associated speck-like protein containing a CARD               |
| 0.972           | 0.989        | 0.995        | 0.972        | 0.982        | 0.964        | 0.986        | 0.976        | 0.981        | 1.013         | 0.996         | 1.006         | O95831       | AIFM1     | Apoptosis-inducing factor 1, mitochondrial                              |
| 1.079           | 1.036        | 1.017        | 1.080        | 0.986        | 1.023        | 1.026        | 1.102        | 0.965        | 1.116         | 0.984         | 1.019         | Q9BRQ8       | AIFM2     | Apoptosis-inducing factor 2                                             |
| 1.313           | 1.147        | 1.354        |              |              |              |              |              |              |               |               |               | O15033       | AREL1     | Apoptosis-resistant E3 ubiquitin protein ligase 1                       |
| 0.988           | 0.977        | 0.991        | 0.984        | 0.969        | 1.011        | 0.983        | 0.934        | 0.995        | 1.017         | 1.007         | 1.010         | Q9UKV3       | ACIN1     | Apoptotic chromatin condensation inducer in the nucleus                 |
| 1.040           | 1.034        | 1.030        | 0.976        | 0.977        | 0.986        | 1.009        | 1.090        | 1.056        | 0.995         | 0.991         | 1.007         | O14727       | APAF1     | Apoptotic protease-activating factor 1                                  |
| 0.918           | 1.028        | 1.095        | 1.033        | 0.948        | 1.003        | 0.946        | 0.952        | 1.059        | 1.149         | 0.960         | 1.100         | Q8IW19       | APLF      | Aprataxin and PNK-like factor                                           |
| 1.029           | 0.956        | 0.995        | 0.995        | 0.884        | 1.026        | 0.987        | 1.116        | 1.010        | 1.007         | 0.976         | 0.973         | Q7Z2E3       | APTX      | Aprataxin                                                               |
|                 |              |              |              |              |              |              |              |              | 0.958         | 1.247         | 1.336         | P16050       | ALOX15    | Arachidonate 15-lipoxygenase                                            |
| 1.012           | 1.030        | 1.063        | 1.016        | 0.985        | 1.036        | 0.995        | 1.081        | 1.024        | 1.034         | 1.001         | 1.066         | Q96II5       | ARAF      | ARAF protein                                                            |
| 1.208           | 1.123        | 1.030        |              |              |              |              |              |              |               |               |               | Q86W34       | AMZ2      | Archaemetzincin-2                                                       |
| 1.003           | 1.016        | 1.005        | 0.981        | 0.999        | 0.998        | 0.992        | 1.003        | 1.004        | 0.979         | 0.970         | 0.998         | B0YIW6       | ARCN1     | Archain 1, isoform CRA_a                                                |
| 1.002           | 1.007        | 1.034        | 0.995        | 0.979        | 0.974        | 1.000        | 0.950        | 0.951        | 1.118         | 0.986         | 1.063         | Q14161       | GIT2      | ARF GTPase-activating protein GIT2                                      |
| 1.053           | 0.964        | 1.017        | 1.028        | 0.998        | 0.996        | 1.000        | 1.043        | 0.963        | 1.026         | 0.987         | 1.004         | P53367       | ARFIP1    | Arfaptin-1                                                              |
| 0.997           | 0.992        | 1.019        | 0.940        | 0.911        | 0.973        | 0.978        | 1.050        | 0.985        | 1.025         | 1.096         | 1.037         | A0A087X1E4   | ARFIP2    | Arfaptin-2                                                              |
| 0.912           | 1.060        | 0.918        | 0.913        | 0.918        | 0.968        | 0.984        | 0.884        | 0.985        | 1.053         | 1.013         | 1.128         | O95081       | AGFG2     | Arf-GAP domain and FG repeat-containing protein 2                       |
| 1.044           | 0.995        | 1.021        | 1.019        | 0.997        | 1.026        | 1.002        | 0.935        | 0.984        | 0.991         | 1.010         | 1.010         | Q15057       | ACAP2     | Arf-GAP with coiled-coil, ANK repeat and PH domain-containing protein 2 |
| 1.074           | 0.972        | 0.986        | 1.022        | 0.962        | 0.990        |              |              |              |               |               |               | Q2V6Q1       | CENTA2    | Arf-GAP with dual PH domain-containing protein 2                        |
| 0.923           | 0.970        | 0.993        | 0.986        | 0.980        | 1.058        | 0.936        | 0.878        | 1.058        | 0.976         | 0.975         | 1.079         | Q9UPQ3       | AGAP1     | Arf-GAP with GTPase, ANK repeat and PH domain-containing protein 1      |
| 1.030           | 0.947        | 1.168        | 1.001        | 0.941        | 1.052        | 1.047        | 0.929        | 1.004        | 1.099         | 0.995         | 1.119         | O43150       | ASAP2     | Arf-GAP with SH3 domain, ANK repeat and PH domain-containing protein 2  |

| Abundance Ratio |              |              |              |              |              |              |              |              |               |               |               | Accession ID | Gene name | Protein Description                                             |
|-----------------|--------------|--------------|--------------|--------------|--------------|--------------|--------------|--------------|---------------|---------------|---------------|--------------|-----------|-----------------------------------------------------------------|
| 1 d<br>M1/C1    | 1 d<br>M2/C2 | 1 d<br>M3/C3 | 4 d<br>M1/C1 | 4 d<br>M2/C2 | 4 d<br>M3/C3 | 7 d<br>M1/C1 | 7 d<br>M2/C2 | 7 d<br>M3/C3 | 10 d<br>M1/C1 | 10 d<br>M2/C2 | 10 d<br>M3/C3 |              |           |                                                                 |
| 1.012           | 0.947        | 1.022        | 0.991        | 0.965        | 1.016        | 0.946        | 0.808        | 0.958        | 1.053         | 1.008         | 1.056         | Q9NWB6       | ARGLU1    | Arginine and glutamate-rich protein 1                           |
| 1.006           | 0.983        | 0.971        | 1.023        | 0.932        | 1.037        | 1.011        | 1.053        | 0.958        | 1.036         | 1.068         | 1.025         | Q7L4I2       | RSRC2     | Arginine/serine-rich coiled-coil protein 2                      |
| 0.893           | 0.952        | 1.006        | 0.962        | 0.960        | 1.125        | 0.958        | 0.867        | 0.983        | 1.050         | 1.007         | 1.151         | Q8TF01       | PNISR     | Arginine/serine-rich protein PNISR                              |
| 1.055           | 0.936        | 1.046        | 0.986        | 0.877        | 0.950        | 0.945        | 0.986        | 1.011        | 0.951         | 1.024         | 0.966         | Q5TEU4       | NDUFAF5   | Arginine-hydroxylase NDUFAF5, mitochondrial                     |
| 1.011           | 1.004        | 1.010        | 1.002        | 0.962        | 0.984        | 1.000        | 1.038        | 1.001        | 0.963         | 1.010         | 0.958         | P54136       | RARS      | Arginine--tRNA ligase, cytoplasmic                              |
| 1.005           | 1.007        | 0.998        | 0.999        | 0.984        | 1.007        | 0.967        | 1.059        | 0.992        | 1.007         | 1.016         | 1.032         | P04424       | ASL       | Argininosuccinate lyase                                         |
| 1.075           | 1.015        | 1.063        | 1.032        | 1.038        | 1.057        | 1.011        | 1.025        | 1.014        | 1.007         | 0.997         | 1.000         | P00966       | ASS1      | Argininosuccinate synthase                                      |
| 1.090           | 0.948        | 0.935        | 0.919        | 0.944        | 1.131        | 1.029        | 1.122        | 1.085        | 1.025         | 0.913         | 1.092         | F5GXE4       | ATE1      | Arginyl-tRNA--protein transferase 1                             |
| 1.013           | 0.993        | 0.995        | 1.002        | 0.953        | 1.011        | 0.976        | 0.979        | 1.004        | 1.046         | 1.015         | 1.022         | O95260       | ATE1      | Arginyl-tRNA--protein transferase 1                             |
| 1.035           | 1.005        | 0.982        | 0.967        | 0.960        | 0.969        | 0.993        | 1.047        | 1.018        | 0.989         | 0.982         | 1.010         | Q1RLN5       | ARHGAP12  | ARHGAP12 protein                                                |
| 0.953           | 1.049        | 1.036        | 1.042        | 0.944        | 1.043        | 1.038        | 1.131        | 1.120        | 0.950         | 1.005         | 1.028         | Q8N8R7       | ARL14EP   | ARL14 effector protein                                          |
| 1.035           | 1.004        | 0.839        |              |              |              |              |              |              |               |               |               | G5E9V6       | ARMC8     | Armadillo repeat containing 8, isoform CRA_e                    |
|                 |              |              | 0.808        | 0.936        | 1.349        | 1.144        | 1.796        | 1.035        | 1.092         | 1.038         | 1.131         | O00192       | ARVCF     | Armadillo repeat protein deleted in velo-cardio-facial syndrome |
| 0.984           | 0.993        | 1.025        | 0.967        | 0.969        | 0.971        | 0.914        | 0.847        | 0.955        | 0.955         | 0.982         | 1.023         | Q9NVT9       | ARMC1     | Armadillo repeat-containing protein 1                           |
| 1.021           | 1.005        | 1.021        | 1.000        | 0.943        | 0.983        | 0.983        | 1.067        | 1.028        | 1.003         | 0.985         | 0.997         | Q8N2F6       | ARMC10    | Armadillo repeat-containing protein 10                          |
| 1.042           | 1.007        | 1.025        | 1.030        | 0.993        | 0.967        | 0.977        | 1.156        | 0.997        | 0.956         | 0.999         | 0.996         | Q6NXE6       | ARMC6     | Armadillo repeat-containing protein 6                           |
| 0.845           | 0.868        | 1.080        | 0.932        | 0.944        | 1.006        | 0.871        | 0.866        | 1.088        | 0.872         | 1.003         | 1.080         | Q9H6L4       | ARMC7     | Armadillo repeat-containing protein 7                           |
| 1.067           | 1.016        | 1.049        | 1.024        | 0.983        | 1.046        | 0.996        | 1.039        | 1.022        | 0.951         | 0.970         | 1.048         | Q8IUR7       | ARMC8     | Armadillo repeat-containing protein 8                           |
| 0.947           | 1.002        | 1.014        | 0.954        | 0.950        | 0.997        | 1.004        | 1.061        | 1.000        | 1.052         | 0.973         | 1.077         | Q9UH62       | ARMCX3    | Armadillo repeat-containing X-linked protein 3                  |
| 0.926           | 0.983        | 1.066        |              |              |              |              |              |              | 0.950         | 1.060         | 0.960         | Q6P1M9       | ARMCX5    | Armadillo repeat-containing X-linked protein 5                  |
| 0.949           | 1.059        | 1.269        | 1.057        | 1.096        | 1.064        | 1.056        | 0.974        | 1.032        | 1.116         | 1.046         | 1.052         | Q8N5I2       | ARRDC1    | Arrestin domain-containing protein 1                            |
| 1.363           | 0.962        | 1.090        | 1.159        | 1.101        | 1.067        |              |              |              |               |               |               | Q96B67       | ARRDC3    | Arrestin domain-containing protein 3                            |
| 0.998           | 1.066        | 1.034        | 1.008        | 1.188        | 1.003        | 0.957        | 1.098        | 1.052        | 1.056         | 1.049         | 1.110         | P27540       | ARNT      | Aryl hydrocarbon receptor nuclear translocator                  |
| 0.972           | 1.008        | 0.998        | 0.967        | 0.907        | 0.957        | 0.983        | 1.058        | 0.950        | 0.995         | 0.966         | 0.971         | A0A0R4J2G3   | NCEH1     | Arylacetamide deacetylase-like 1                                |
| 1.174           | 0.809        | 1.302        | 0.966        | 0.735        | 0.940        | 0.935        | 1.083        | 1.054        |               |               |               | F5H5R8       | NAT1      | Arylamine N-acetyltransferase 1                                 |
| 0.936           | 0.996        | 0.972        | 1.009        | 0.976        | 0.987        | 0.970        | 1.035        | 1.035        | 1.053         | 0.990         | 1.044         | A0A0C4DFZ2   | ARSA      | Arylsulfatase A                                                 |
| 0.971           | 0.998        | 1.089        | 0.983        | 1.005        | 1.002        | 0.985        | 0.975        | 0.971        | 1.008         | 1.057         | 1.060         | P15848       | ARSB      | Arylsulfatase B                                                 |
| 1.026           | 1.250        | 1.013        | 0.981        | 0.898        | 0.939        | 0.992        | 1.426        | 0.905        | 0.907         | 0.953         | 1.174         | P51689       | ARSD      | Arylsulfatase D                                                 |
| 1.105           | 0.980        | 1.024        | 0.948        | 0.895        | 1.052        | 1.054        | 1.046        | 1.024        | 1.093         | 0.991         | 1.144         | F5GYY5       | ARSE      | Arylsulfatase E                                                 |
|                 |              |              | 1.003        | 0.919        | 0.996        | 0.922        | 1.037        | 0.997        | 1.083         | 0.964         | 1.115         | Q6UWY0       | ARSK      | Arylsulfatase K                                                 |
| 1.044           | 1.038        | 0.993        | 1.005        | 1.005        | 0.974        | 1.025        | 1.065        | 0.991        | 1.009         | 1.028         | 1.058         | Q9BVC5       | C2orf49   | Ashwin                                                          |
| 1.017           | 1.020        | 0.983        | 1.058        | 1.027        | 1.037        | 1.047        | 1.118        | 1.027        | 0.959         | 1.047         | 1.028         | P08243       | ASNS      | Asparagine synthetase [glutamine-hydrolyzing]                   |
| 1.011           | 0.806        | 0.912        | 0.835        | 0.610        | 1.052        | 1.341        | 0.855        | 0.848        |               |               |               | Q9NWL6       | ASNSD1    | Asparagine synthetase domain-containing protein 1               |

| Abundance Ratio |              |              |              |              |              |              |              |              |               |               |               | Accession ID | Gene name | Protein Description                                     |
|-----------------|--------------|--------------|--------------|--------------|--------------|--------------|--------------|--------------|---------------|---------------|---------------|--------------|-----------|---------------------------------------------------------|
| 1 d<br>M1/C1    | 1 d<br>M2/C2 | 1 d<br>M3/C3 | 4 d<br>M1/C1 | 4 d<br>M2/C2 | 4 d<br>M3/C3 | 7 d<br>M1/C1 | 7 d<br>M2/C2 | 7 d<br>M3/C3 | 10 d<br>M1/C1 | 10 d<br>M2/C2 | 10 d<br>M3/C3 |              |           |                                                         |
| 0.994           | 1.010        | 0.992        | 1.008        | 1.026        | 0.975        | 0.984        | 1.020        | 0.997        | 0.973         | 0.994         | 0.980         | O43776       | NARS      | Asparagine--tRNA ligase, cytoplasmic                    |
| 0.993           | 0.999        | 0.995        | 0.987        | 0.972        | 0.984        | 0.967        | 1.011        | 1.017        | 0.985         | 0.966         | 0.976         | P17174       | GOT1      | Aspartate aminotransferase, cytoplasmic                 |
| 1.024           | 1.008        | 1.000        | 1.010        | 1.162        | 0.956        | 1.020        | 0.962        | 1.017        | 0.993         | 0.988         | 0.974         | P00505       | GOT2      | Aspartate aminotransferase, mitochondrial               |
| 1.013           | 1.018        | 0.991        | 1.007        | 1.014        | 0.970        | 0.993        | 1.009        | 0.977        | 0.982         | 1.005         | 0.969         | P14868       | DARS      | Aspartate--tRNA ligase, cytoplasmic                     |
| 1.020           | 1.003        | 1.015        | 0.977        | 0.997        | 0.994        | 0.995        | 0.942        | 1.003        | 0.974         | 0.979         | 1.009         | Q6PI48       | DARS2     | Aspartate--tRNA ligase, mitochondrial                   |
|                 |              |              | 1.016        | 0.943        | 0.894        |              |              |              |               |               |               | B9ZVU2       | DNPEP     | Aspartyl aminopeptidase (Fragment)                      |
| 0.980           | 1.013        | 1.009        | 0.975        | 0.994        | 0.997        | 0.986        | 1.000        | 0.973        | 0.988         | 0.992         | 0.999         | E7ETB3       | DNPEP     | Aspartyl aminopeptidase                                 |
| 0.966           | 0.989        | 1.016        | 1.006        | 0.980        | 1.017        | 1.001        | 1.038        | 1.020        | 1.062         | 0.994         | 1.035         | Q12797       | ASPH      | Aspartyl/asparaginyl beta-hydroxylase                   |
| 0.998           | 1.003        | 1.016        | 1.009        | 0.985        | 1.022        | 1.028        | 1.039        | 1.038        | 0.997         | 0.976         | 1.018         | Q9UBB4       | ATXN10    | Ataxin-10                                               |
| 1.003           | 0.995        | 1.038        | 1.014        | 1.039        | 1.029        | 0.991        | 0.972        | 0.948        | 1.072         | 1.068         | 1.252         | P0C7T5       | ATXN1L    | Ataxin-1-like                                           |
| 1.008           | 0.999        | 1.043        | 0.990        | 0.979        | 0.974        | 1.036        | 0.950        | 1.008        | 1.061         | 1.009         | 1.066         | Q99700       | ATXN2     | Ataxin-2                                                |
|                 |              |              | 0.919        | 0.981        | 0.698        | 0.937        | 1.530        | 0.929        |               |               |               | H3BUF6       | ATXN2L    | Ataxin-2-like protein                                   |
| 0.988           | 1.003        | 0.992        | 0.996        | 0.975        | 1.000        | 0.999        | 0.981        | 0.997        | 1.016         | 1.063         | 1.016         | Q8WWM7       | ATXN2L    | Ataxin-2-like protein                                   |
| 0.985           | 1.003        | 1.054        | 0.956        | 1.056        | 0.974        | 1.019        | 1.020        | 1.074        | 0.981         | 1.000         | 1.034         | F5H211       | ATXN3     | Ataxin-3                                                |
| 1.095           | 1.077        | 1.048        | 1.098        | 1.031        | 1.005        | 0.974        | 0.776        | 1.086        | 1.040         | 0.982         | 1.027         | Q6SPF0       | SAMD1     | Atherin                                                 |
| 1.018           | 1.041        | 0.977        | 1.069        | 0.951        | 0.962        | 0.958        | 1.170        | 0.900        | 0.885         | 0.888         | 1.090         | Q5TGY3       | AHDC1     | AT-hook DNA-binding motif-containing protein 1          |
| 0.980           | 0.964        | 1.047        | 1.030        | 0.941        | 1.017        | 1.076        | 0.965        | 1.036        | 1.029         | 0.864         | 1.063         | Q8NHH9       | ATL2      | Atlantin-2                                              |
| 0.971           | 1.002        | 1.014        | 0.971        | 0.929        | 0.982        | 0.986        | 0.988        | 0.988        | 0.986         | 1.000         | 0.996         | Q6DD88       | ATL3      | Atlantin-3                                              |
| 0.984           | 0.976        | 0.990        | 0.998        | 0.997        | 0.972        | 0.968        | 0.979        | 0.984        | 0.998         | 0.988         | 0.973         | P24539       | ATP5F1    | ATP synthase F(0) complex subunit B1, mitochondrial     |
| 1.090           | 1.056        | 1.027        | 1.001        | 1.013        | 0.913        | 0.896        | 1.093        | 0.991        | 0.938         | 0.897         | 0.835         | I3L448       | ATPAF1    | ATP synthase mitochondrial F1 complex assembly factor 1 |
| 0.993           | 1.000        | 1.005        | 0.964        | 0.941        | 1.025        | 0.992        | 1.009        | 1.029        | 1.060         | 0.942         | 1.065         | Q8N5M1       | ATPAF2    | ATP synthase mitochondrial F1 complex assembly factor 2 |
|                 |              |              |              |              |              | 1.088        | 1.127        | 1.204        | 1.047         | 1.011         | 1.044         | P03928       | MT-ATP8   | ATP synthase protein 8                                  |
| 0.979           | 0.952        | 0.936        | 0.908        | 0.715        | 0.923        | 0.902        | 1.112        | 0.953        | 0.983         | 1.020         | 0.853         | P00846       | MT-ATP6   | ATP synthase subunit a                                  |
| 0.954           | 0.985        | 0.983        | 0.976        | 0.965        | 0.995        | 0.969        | 0.953        | 0.989        | 0.999         | 0.982         | 1.007         | P25705       | ATP5A1    | ATP synthase subunit alpha, mitochondrial               |
| 1.135           | 0.934        | 1.628        | 1.023        | 0.987        | 0.884        | 0.952        | 1.067        | 1.074        | 1.021         | 0.972         | 1.145         | F8W0P7       | ATP5B     | ATP synthase subunit beta, mitochondrial (Fragment)     |
| 0.948           | 1.014        | 0.981        | 0.984        | 1.004        | 1.021        | 1.001        | 1.047        | 1.018        | 0.996         | 0.999         | 1.007         | P06576       | ATP5B     | ATP synthase subunit beta, mitochondrial                |
| 1.032           | 0.995        | 0.988        | 1.129        | 1.078        | 0.993        | 1.080        | 1.022        | 1.018        | 1.105         | 1.007         | 0.984         | O75947       | ATP5H     | ATP synthase subunit d, mitochondrial                   |
| 0.982           | 0.971        | 1.021        | 0.953        | 0.954        | 0.969        | 1.015        | 1.003        | 0.994        | 0.992         | 0.973         | 1.019         | P30049       | ATP5D     | ATP synthase subunit delta, mitochondrial               |
| 0.937           | 1.010        | 0.991        | 0.923        | 1.014        | 0.951        | 0.950        | 1.026        | 0.966        | 0.978         | 0.986         | 0.963         | P56385       | ATP5I     | ATP synthase subunit e, mitochondrial                   |
| 1.247           | 1.009        | 1.012        | 1.146        | 1.826        | 0.925        | 1.123        | 0.774        | 1.140        | 1.027         | 0.959         | 0.894         | P56381       | ATP5E     | ATP synthase subunit epsilon, mitochondrial             |
| 0.898           | 1.002        | 0.963        | 0.966        | 1.113        | 0.958        | 0.944        | 0.972        | 0.927        | 1.017         | 0.972         | 0.957         | O75964       | ATP5L     | ATP synthase subunit g, mitochondrial                   |



| Abundance Ratio |              |              |              |              |              |              |              |              |               |               |               | Accession ID | Gene name    | Protein Description                                                     |
|-----------------|--------------|--------------|--------------|--------------|--------------|--------------|--------------|--------------|---------------|---------------|---------------|--------------|--------------|-------------------------------------------------------------------------|
| 1 d<br>M1/C1    | 1 d<br>M2/C2 | 1 d<br>M3/C3 | 4 d<br>M1/C1 | 4 d<br>M2/C2 | 4 d<br>M3/C3 | 7 d<br>M1/C1 | 7 d<br>M2/C2 | 7 d<br>M3/C3 | 10 d<br>M1/C1 | 10 d<br>M2/C2 | 10 d<br>M3/C3 |              |              |                                                                         |
| 0.900           | 0.873        | 0.980        | 0.966        | 0.851        | 1.090        | 0.928        | 0.985        | 1.138        | 0.946         | 0.815         | 1.269         | P36542       | ATP5C1       | ATP synthase subunit gamma, mitochondrial                               |
| 1.025           | 1.019        | 0.969        | 1.011        | 1.001        | 0.967        | 0.983        | 1.065        | 0.947        | 0.999         | 0.986         | 0.942         | P48047       | ATP5O        | ATP synthase subunit O, mitochondrial                                   |
| 1.043           | 1.012        | 1.062        | 0.998        | 0.963        | 1.048        | 1.015        | 1.048        | 1.023        | 1.061         | 0.995         | 1.076         | Q99766       | ATP5S        | ATP synthase subunit s, mitochondrial                                   |
| 0.928           | 0.989        | 0.989        | 0.973        | 0.894        | 1.019        | 0.966        | 1.069        | 1.041        | 1.022         | 0.944         | 1.014         | G3V325       | ATP5J2-PTCD1 | ATP5J2-PTCD1 readthrough                                                |
| 0.973           | 0.994        | 1.005        | 0.993        | 1.023        | 0.982        | 0.984        | 1.086        | 1.023        | 0.986         | 0.989         | 0.989         | O43681       | ASNA1        | ATPase ASNA1                                                            |
| 0.977           | 0.973        | 1.037        | 0.995        | 1.012        | 1.015        | 0.989        | 1.074        | 1.030        | 1.017         | 1.002         | 0.988         | Q8NBU5       | ATAD1        | ATPase family AAA domain-containing protein 1                           |
| 0.921           | 0.977        | 0.937        | 1.058        | 1.006        | 1.006        | 1.010        | 1.071        | 1.046        | 0.981         | 0.980         | 1.065         | Q6PL18       | ATAD2        | ATPase family AAA domain-containing protein 2                           |
| 1.072           | 1.154        | 0.759        |              |              |              |              |              |              | 1.134         | 0.753         | 1.137         | Q9ULI0       | ATAD2B       | ATPase family AAA domain-containing protein 2B                          |
| 0.940           | 1.003        | 1.006        | 0.972        | 0.958        | 0.990        | 0.983        | 0.970        | 0.999        | 0.992         | 1.002         | 1.048         | Q5T9A4       | ATAD3B       | ATPase family AAA domain-containing protein 3B                          |
| 1.031           | 0.994        | 0.932        | 0.927        | 0.933        | 0.998        | 0.930        | 0.880        | 0.971        | 1.038         | 0.984         | 1.033         | Q9UII2       | ATPIF1       | ATPase inhibitor, mitochondrial                                         |
| 1.023           | 0.981        | 1.015        | 1.030        | 0.966        | 1.006        | 1.004        | 1.053        | 0.982        | 1.021         | 0.988         | 1.009         | Q96S55       | WRNIP1       | ATPase WRNIP1                                                           |
| 0.987           | 0.998        | 1.076        | 0.962        | 0.885        | 1.056        | 1.023        | 1.010        | 1.123        | 0.993         | 0.941         | 1.013         | Q99758       | ABCA3        | ATP-binding cassette sub-family A member 3                              |
| 1.019           | 1.005        | 1.037        | 1.002        | 0.930        | 1.048        | 1.032        | 1.022        | 1.032        | 1.039         | 1.012         | 1.081         | Q9NRK6       | ABCB10       | ATP-binding cassette sub-family B member 10, mitochondrial              |
| 1.062           | 0.968        | 1.058        | 0.993        | 0.920        | 1.028        | 1.028        | 1.039        | 1.017        | 1.248         | 0.919         | 1.096         | Q9NUT2       | ABCB8        | ATP-binding cassette sub-family B member 8, mitochondrial               |
| 0.905           | 0.994        | 1.135        | 0.960        | 0.808        | 0.998        | 0.958        | 1.063        | 1.097        | 0.988         | 0.960         | 0.874         | P33897       | ABCD1        | ATP-binding cassette sub-family D member 1                              |
| 0.998           | 1.000        | 0.994        | 1.014        | 1.013        | 1.020        | 1.020        | 1.022        | 1.027        | 1.002         | 0.972         | 1.003         | P28288       | ABCD3        | ATP-binding cassette sub-family D member 3                              |
| 0.981           | 1.059        | 1.007        | 1.111        | 0.937        | 1.012        | 1.116        | 1.494        | 0.941        |               |               |               | O14678       | ABCD4        | ATP-binding cassette sub-family D member 4                              |
| 1.036           | 1.011        | 0.991        | 1.010        | 1.033        | 0.991        | 1.020        | 1.011        | 1.010        | 1.008         | 1.006         | 1.005         | P61221       | ABCE1        | ATP-binding cassette sub-family E member 1                              |
| 0.666           | 0.839        | 1.064        | 0.796        | 0.918        | 1.050        | 0.694        | 0.487        | 0.804        | 1.207         | 0.905         | 1.126         | Q5STZ8       | ABCF1        | ATP-binding cassette sub-family F member 1 (Fragment)                   |
| 0.954           | 0.998        | 0.975        | 0.958        | 1.002        | 0.985        | 0.981        | 0.974        | 0.993        | 0.977         | 0.990         | 1.007         | Q8NE71       | ABCF1        | ATP-binding cassette sub-family F member 1                              |
| 1.008           | 0.975        | 1.006        | 0.997        | 0.947        | 1.031        | 0.995        | 0.897        | 1.011        | 1.053         | 1.030         | 1.141         | Q9NUQ8       | ABCF3        | ATP-binding cassette sub-family F member 3                              |
| 0.942           | 0.994        | 0.977        | 1.019        | 1.034        | 0.994        | 1.030        | 1.034        | 1.030        | 1.032         | 1.024         | 1.014         | P53396       | ACLY         | ATP-citrate synthase                                                    |
| 1.048           | 1.042        | 1.001        | 0.989        | 0.974        | 0.979        | 1.044        | 1.038        | 1.010        | 0.988         | 1.014         | 1.004         | Q8IW45       | NAXD         | ATP-dependent (S)-NAD(P)H-hydrate dehydratase                           |
| 1.040           | 1.017        | 1.011        | 1.015        | 1.057        | 0.977        | 1.006        | 1.030        | 1.015        | 0.961         | 0.967         | 0.982         | P17858       | PFKL         | ATP-dependent 6-phosphofructokinase, liver type                         |
| 1.016           | 1.021        | 0.992        | 0.999        | 1.019        | 0.988        | 0.993        | 1.028        | 1.011        | 0.950         | 1.011         | 0.964         | Q01813       | PFKP         | ATP-dependent 6-phosphofructokinase, platelet type                      |
| 1.037           | 1.026        | 1.013        | 1.018        | 0.974        | 0.987        | 1.035        | 1.068        | 1.005        | 1.003         | 0.983         | 1.050         | O76031       | CLPX         | ATP-dependent Clp protease ATP-binding subunit clpX-like, mitochondrial |
| 1.011           | 1.018        | 0.976        | 1.002        | 0.954        | 1.014        | 1.003        | 1.023        | 0.990        | 1.020         | 1.023         | 0.986         | Q16740       | CLPP         | ATP-dependent Clp protease proteolytic subunit, mitochondrial           |
| 0.972           | 1.004        | 0.991        | 0.988        | 1.022        | 0.980        | 0.969        | 0.978        | 0.975        | 0.960         | 0.998         | 0.951         | P46063       | RECQL        | ATP-dependent DNA helicase Q1                                           |
| 0.998           | 1.038        | 0.987        | 1.324        | 0.847        | 1.058        | 1.092        | 1.155        | 0.961        | 0.966         | 0.939         | 0.861         | A0A087WZ30   | RECQL4       | ATP-dependent DNA helicase Q4                                           |
|                 |              |              | 1.110        | 0.907        | 0.902        | 1.087        | 1.136        | 0.972        | 0.843         | 0.811         | 0.950         | O94762       | RECQL5       | ATP-dependent DNA helicase Q5                                           |

| Abundance Ratio |              |              |              |              |              |              |              |              |               |               |               | Accession ID | Gene name | Protein Description                               |
|-----------------|--------------|--------------|--------------|--------------|--------------|--------------|--------------|--------------|---------------|---------------|---------------|--------------|-----------|---------------------------------------------------|
| 1 d<br>M1/C1    | 1 d<br>M2/C2 | 1 d<br>M3/C3 | 4 d<br>M1/C1 | 4 d<br>M2/C2 | 4 d<br>M3/C3 | 7 d<br>M1/C1 | 7 d<br>M2/C2 | 7 d<br>M3/C3 | 10 d<br>M1/C1 | 10 d<br>M2/C2 | 10 d<br>M3/C3 |              |           |                                                   |
| 1.006           | 1.001        | 0.999        | 0.995        | 1.043        | 1.007        | 1.032        | 1.034        | 1.025        | 1.018         | 1.007         | 1.017         | Q08211       | DHX9      | ATP-dependent RNA helicase A                      |
| 0.989           | 1.014        | 0.991        | 0.998        | 1.021        | 0.996        | 0.984        | 1.028        | 1.010        | 1.006         | 1.002         | 1.003         | Q92499       | DDX1      | ATP-dependent RNA helicase DDX1                   |
| 0.978           | 1.007        | 0.994        | 1.003        | 0.978        | 1.018        | 0.987        | 1.014        | 0.989        | 1.001         | 1.061         | 0.994         | Q9NVP1       | DDX18     | ATP-dependent RNA helicase DDX18                  |
| 1.005           | 1.001        | 1.003        | 1.013        | 1.002        | 0.987        | 1.005        | 1.017        | 0.999        | 0.986         | 1.016         | 0.989         | Q9NUU7       | DDX19A    | ATP-dependent RNA helicase DDX19A                 |
| 0.983           | 1.068        | 0.942        | 0.939        | 1.003        | 1.003        | 1.059        | 1.136        | 1.004        | 0.918         | 1.038         | 1.074         | H3BQK0       | DDX19B    | ATP-dependent RNA helicase DDX19B                 |
| 0.996           | 1.007        | 0.996        | 1.008        | 0.984        | 1.004        | 1.001        | 0.986        | 0.984        | 1.043         | 1.049         | 1.017         | Q9GZR7       | DDX24     | ATP-dependent RNA helicase DDX24                  |
| 1.019           | 1.016        | 1.017        | 1.046        | 1.051        | 0.973        | 0.939        | 0.919        | 0.985        | 0.988         | 1.056         | 1.057         | O00148       | DDX39A    | ATP-dependent RNA helicase DDX39A                 |
| 1.019           | 1.000        | 0.990        | 1.018        | 1.022        | 1.016        | 1.026        | 1.019        | 1.021        | 1.021         | 0.995         | 1.025         | O00571       | DDX3X     | ATP-dependent RNA helicase DDX3X                  |
| 1.045           | 1.007        | 0.986        | 1.008        | 0.968        | 1.014        | 1.005        | 1.080        | 1.001        | 1.026         | 1.014         | 1.027         | Q86XP3       | DDX42     | ATP-dependent RNA helicase DDX42                  |
| 1.016           | 0.993        | 0.982        | 1.033        | 0.970        | 0.974        | 1.042        | 1.034        | 0.985        | 1.041         | 1.002         | 1.036         | Q9BQ39       | DDX50     | ATP-dependent RNA helicase DDX50                  |
| 1.010           | 1.007        | 0.992        | 0.995        | 0.983        | 1.040        | 1.001        | 1.072        | 1.013        | 1.016         | 0.980         | 1.035         | Q8N8A6       | DDX51     | ATP-dependent RNA helicase DDX51                  |
| 1.042           | 1.008        | 1.029        | 1.021        | 0.996        | 1.022        | 1.016        | 0.992        | 1.019        | 1.008         | 1.028         | 1.056         | Q8TDD1       | DDX54     | ATP-dependent RNA helicase DDX54                  |
| 1.082           | 0.989        | 1.086        | 0.996        | 1.003        | 0.997        | 0.996        | 1.091        | 1.031        | 1.005         | 1.029         | 1.022         | Q8NHQ9       | DDX55     | ATP-dependent RNA helicase DDX55                  |
| 1.022           | 1.006        | 1.031        | 0.995        | 0.986        | 1.020        | 0.959        | 0.987        | 1.001        | 1.015         | 0.998         | 1.034         | A0A087WYN9   | DHX29     | ATP-dependent RNA helicase DHX29                  |
| 1.011           | 0.996        | 1.010        | 0.976        | 0.946        | 1.009        | 1.015        | 1.068        | 1.070        | 1.023         | 1.003         | 1.051         | Q9H2U1       | DHX36     | ATP-dependent RNA helicase DHX36                  |
| 0.999           | 0.991        | 1.006        | 1.006        | 0.963        | 1.040        | 1.009        | 1.103        | 1.029        | 0.965         | 1.023         | 1.028         | Q14562       | DHX8      | ATP-dependent RNA helicase DHX8                   |
| 1.007           | 0.977        | 1.026        | 1.004        | 0.989        | 1.043        | 1.014        | 1.017        | 1.029        | 0.994         | 1.010         | 0.986         | Q8IYB8       | SUPV3L1   | ATP-dependent RNA helicase SUPV3L1, mitochondrial |
| 0.990           | 0.993        | 1.017        | 1.005        | 0.974        | 1.045        | 1.013        | 1.043        | 1.020        | 0.950         | 0.904         | 1.038         | Q96TA2       | YME1L1    | ATP-dependent zinc metalloprotease YME1L1         |
| 1.143           | 0.958        | 1.107        | 1.010        | 1.055        | 1.102        | 0.998        | 1.076        | 0.953        | 1.137         | 1.052         | 0.972         | P16066       | NPR1      | Atrial natriuretic peptide receptor 1             |
| 0.983           | 0.981        | 1.018        | 1.012        | 0.986        | 1.033        | 1.035        | 0.992        | 0.996        | 1.011         | 1.027         | 1.054         | O14497       | ARID1A    | AT-rich interactive domain-containing protein 1A  |
| 0.983           | 0.994        | 1.001        | 0.975        | 0.920        | 1.022        | 0.974        | 0.955        | 1.011        | 1.024         | 1.020         | 1.041         | Q68CP9       | ARID2     | AT-rich interactive domain-containing protein 2   |
| 1.040           | 1.059        | 1.054        | 1.140        | 0.794        | 1.066        | 0.929        | 0.971        | 1.054        | 0.980         | 0.929         | 1.190         | Q99856       | ARID3A    | AT-rich interactive domain-containing protein 3A  |
| 1.057           | 1.012        | 0.983        | 1.007        | 0.899        | 0.964        | 1.024        | 1.046        | 0.967        | 1.082         | 0.969         | 1.070         | P29374       | ARID4A    | AT-rich interactive domain-containing protein 4A  |
| 1.005           | 0.954        | 1.081        | 1.025        | 0.929        | 1.039        | 0.948        | 0.867        | 1.017        | 1.025         | 0.986         | 1.052         | Q4LE39       | ARID4B    | AT-rich interactive domain-containing protein 4B  |
| 0.993           | 1.035        | 1.252        | 0.950        | 0.993        | 0.936        | 0.876        | 1.232        | 1.001        | 0.844         | 0.900         | 0.939         | Q8WXE1       | ATRIP     | ATR-interacting protein                           |
| 1.089           | 0.915        | 0.907        | 0.974        | 0.914        | 1.020        | 0.900        | 1.072        | 0.961        | 1.043         | 1.048         | 1.118         | P54259       | ATN1      | Atrophin-1                                        |
| 1.073           | 1.067        | 1.045        | 1.025        | 1.022        | 1.089        | 0.964        | 1.154        | 1.091        | 1.023         | 1.049         | 1.031         | O75882       | ATRN      | Attractin                                         |
| 1.010           | 1.020        | 0.994        | 0.977        | 0.958        | 0.991        | 0.954        | 1.029        | 0.994        | 0.980         | 1.004         | 0.993         | Q8NI60       | COQ8A     | Atypical kinase COQ8A, mitochondrial              |
| 1.033           | 1.000        | 1.080        | 1.008        | 0.980        | 0.977        | 0.963        | 0.993        | 1.056        | 1.007         | 1.034         | 1.094         | Q96D53       | COQ8B     | Atypical kinase COQ8B, mitochondrial              |
| 0.950           | 0.998        | 1.010        | 1.009        | 0.904        | 1.310        | 0.997        | 1.159        | 0.961        | 1.080         | 0.957         | 1.166         | O14965       | AURKA     | Aurora kinase A                                   |
| 0.957           | 0.973        | 1.040        | 1.002        | 0.966        | 1.031        | 0.997        | 1.002        | 1.029        | 1.088         | 1.008         | 1.123         | Q9NWT8       | AURKAIP1  | Aurora kinase A-interacting protein               |
| 1.004           | 1.042        | 1.015        | 0.974        | 0.972        | 0.960        | 0.959        | 1.066        | 0.982        | 0.982         | 0.986         | 0.982         | Q9H1Y0       | ATG5      | Autophagy protein 5                               |
| 1.040           | 1.010        | 1.116        | 0.922        | 0.968        | 1.121        | 1.023        | 0.846        | 1.062        | 0.965         | 1.006         | 1.077         | Q9BSB4       | ATG101    | Autophagy-related protein 101                     |

| Abundance Ratio |              |              |              |              |              |              |              |              |               |               |               | Accession ID | Gene name | Protein Description                                                     |
|-----------------|--------------|--------------|--------------|--------------|--------------|--------------|--------------|--------------|---------------|---------------|---------------|--------------|-----------|-------------------------------------------------------------------------|
| 1 d<br>M1/C1    | 1 d<br>M2/C2 | 1 d<br>M3/C3 | 4 d<br>M1/C1 | 4 d<br>M2/C2 | 4 d<br>M3/C3 | 7 d<br>M1/C1 | 7 d<br>M2/C2 | 7 d<br>M3/C3 | 10 d<br>M1/C1 | 10 d<br>M2/C2 | 10 d<br>M3/C3 |              |           |                                                                         |
| 0.975           | 0.977        | 1.026        | 0.975        | 1.007        | 1.031        | 1.001        | 0.949        | 1.012        | 0.993         | 0.973         | 1.079         | Q676U5       | ATG16L1   | Autophagy-related protein 16-1                                          |
| 0.939           | 1.019        | 1.091        | 0.962        | 0.948        | 1.076        | 0.978        | 0.962        | 1.148        | 1.106         | 1.019         | 0.976         | Q96BY7       | ATG2B     | Autophagy-related protein 2 homolog B                                   |
| 0.999           | 0.971        | 1.001        | 0.986        | 0.960        | 1.067        | 0.901        | 1.109        | 0.984        | 1.057         | 0.905         | 1.056         | Q7Z3C6       | ATG9A     | Autophagy-related protein 9A                                            |
| 1.089           | 1.014        | 1.041        | 0.997        | 0.955        | 0.985        | 0.978        | 1.039        | 0.987        | 0.938         | 1.004         | 0.940         | Q96BJ3       | AIDA      | Axin interactor, dorsalization-associated protein                       |
| 1.129           | 1.125        | 1.045        | 0.842        | 1.507        | 1.099        | 0.956        | 0.849        | 1.087        |               |               |               | O15169       | AXIN1     | Axin-1                                                                  |
| 1.087           | 0.976        | 1.002        | 1.171        | 1.126        | 1.071        | 1.017        | 0.743        | 0.903        | 1.007         | 0.853         | 1.166         | Q9UPM9       | B9D1      | B9 domain-containing protein 1                                          |
| 0.965           | 0.977        | 1.015        | 0.976        | 0.964        | 1.024        | 1.018        | 1.061        | 1.015        | 1.007         | 1.015         | 1.034         | Q13490       | BIRC2     | Baculoviral IAP repeat-containing protein 2                             |
|                 |              |              | 1.025        | 0.691        | 1.056        |              |              |              |               |               |               | Q13489       | BIRC3     | Baculoviral IAP repeat-containing protein 3                             |
| 0.921           | 0.968        | 1.031        | 1.050        | 1.067        | 1.174        | 1.032        | 0.913        | 0.992        | 0.974         | 0.826         | 1.063         | O15392       | BIRC5     | Baculoviral IAP repeat-containing protein 5                             |
| 0.978           | 1.028        | 1.044        | 0.993        | 0.932        | 1.052        | 1.037        | 1.054        | 0.961        | 0.946         | 0.933         | 1.005         | Q9NR09       | BIRC6     | Baculoviral IAP repeat-containing protein 6                             |
| 1.011           | 0.939        | 1.010        | 1.044        | 0.984        | 1.048        | 1.121        | 0.996        | 1.072        | 1.115         | 1.027         | 1.108         | J3QTA2       | BAG1      | BAG family molecular chaperone regulator 1                              |
| 0.974           | 0.995        | 0.994        | 0.931        | 0.942        | 1.016        | 0.976        | 0.921        | 1.008        | 1.007         | 0.958         | 1.025         | O95816       | BAG2      | BAG family molecular chaperone regulator 2                              |
| 1.004           | 0.993        | 0.986        | 1.005        | 0.978        | 1.026        | 0.999        | 0.966        | 1.012        | 1.002         | 0.977         | 1.047         | O95817       | BAG3      | BAG family molecular chaperone regulator 3                              |
| 1.018           | 0.986        | 1.026        | 1.060        | 0.949        | 1.093        | 1.037        | 0.981        | 1.091        | 1.011         | 1.037         | 1.010         | O95429       | BAG4      | BAG family molecular chaperone regulator 4                              |
| 0.800           | 0.907        | 0.927        | 1.055        | 1.028        | 1.049        | 1.157        | 1.148        | 0.997        | 1.289         | 0.908         | 1.368         | A0A075B747   | BAHCC1    | BAH and coiled-coil domain-containing protein 1                         |
| 1.001           | 1.001        | 1.005        | 0.991        | 1.007        | 1.004        | 1.001        | 1.005        | 0.992        | 0.983         | 0.965         | 1.011         | O43491       | EPB41L2   | Band 4.1-like protein 2                                                 |
| 1.072           | 1.023        | 1.061        | 1.064        | 0.908        | 0.994        | 1.007        | 0.980        | 1.040        | 1.010         | 0.977         | 1.053         | Q9BXC9       | BBS2      | Bardet-Biedl syndrome 2 protein                                         |
| 0.999           | 1.006        | 1.041        | 1.029        | 0.955        | 0.990        | 0.995        | 1.095        | 0.976        | 0.966         | 1.035         | 1.078         | Q8IWZ6       | BBS7      | Bardet-Biedl syndrome 7 protein                                         |
| 1.160           | 1.119        | 1.135        | 1.075        | 1.130        | 0.915        | 0.828        | 0.885        | 0.978        | 0.896         | 1.021         | 0.837         | O75531       | BANF1     | Barrier-to-autointegration factor                                       |
| 0.955           | 0.964        | 0.993        | 1.029        | 0.969        | 0.986        | 1.091        | 0.932        | 1.098        | 1.151         | 1.279         | 1.145         | P50895       | BCAM      | Basal cell adhesion molecule                                            |
| 0.966           | 1.076        | 1.204        | 1.039        | 0.995        | 1.071        |              |              |              |               |               |               | P98160       | HSPG2     | Basement membrane-specific heparan sulfate<br>proteoglycan core protein |
| 0.990           | 0.995        | 1.013        | 1.001        | 0.958        | 1.032        | 0.984        | 1.014        | 1.007        | 1.015         | 1.010         | 1.036         | Q9Y6E2       | BZW2      | Basic leucine zipper and W2 domain-containing protein<br>2              |
| 0.966           | 0.993        | 0.981        | 0.995        | 0.965        | 1.025        | 1.004        | 1.000        | 0.990        | 0.963         | 1.016         | 0.959         | P35613       | BSG       | Basigin                                                                 |
| 1.005           | 0.923        | 0.951        | 0.977        | 0.937        | 1.039        | 0.991        | 1.108        | 1.068        | 1.227         | 1.048         | 0.996         | Q13286       | CLN3      | Battenin                                                                |
| 1.034           | 0.983        | 1.010        | 1.056        | 0.889        | 0.990        | 1.071        | 1.068        | 0.997        | 1.064         | 0.983         | 1.090         | Q9BQE9       | BCL7B     | B-cell CLL/lymphoma 7 protein family member B                           |
| 1.012           | 1.003        | 1.028        | 1.021        | 0.918        | 1.002        | 0.946        | 1.030        | 1.003        | 1.058         | 1.010         | 1.127         | I3L1Q2       | BCL7C     | B-cell CLL/lymphoma 7 protein family member C<br>(Fragment)             |
| 0.986           | 0.990        | 1.032        | 0.984        | 0.994        | 1.075        | 1.015        | 0.910        | 0.987        | 0.973         | 1.029         | 1.105         | Q86UU0       | BCL9L     | B-cell CLL/lymphoma 9-like protein                                      |
| 1.055           | 1.014        | 1.104        | 0.922        | 0.931        | 0.991        | 0.990        | 1.127        | 1.048        | 1.003         | 1.051         | 1.009         | P20749       | BCL3      | B-cell lymphoma 3 protein                                               |
| 0.971           | 0.969        | 0.983        | 0.966        | 0.952        | 1.025        | 1.032        | 1.005        | 0.961        | 1.068         | 0.986         | 1.122         | O95999       | BCL10     | B-cell lymphoma/leukemia 10                                             |
| 0.917           | 0.984        | 0.947        | 0.964        | 0.986        | 1.045        | 1.081        | 0.987        | 0.978        | 1.129         | 1.065         | 1.117         | Q9UHQ4       | BCAP29    | B-cell receptor-associated protein 29                                   |
| 0.981           | 0.951        | 0.979        | 0.930        | 0.821        | 1.001        | 0.945        | 1.021        | 0.980        | 0.940         | 0.949         | 1.012         | Q16611       | BAK1      | Bcl-2 homologous antagonist/killer                                      |

| Abundance Ratio |              |              |              |              |              |              |              |              |               |               |               | Accession ID | Gene name | Protein Description                                                 |
|-----------------|--------------|--------------|--------------|--------------|--------------|--------------|--------------|--------------|---------------|---------------|---------------|--------------|-----------|---------------------------------------------------------------------|
| 1 d<br>M1/C1    | 1 d<br>M2/C2 | 1 d<br>M3/C3 | 4 d<br>M1/C1 | 4 d<br>M2/C2 | 4 d<br>M3/C3 | 7 d<br>M1/C1 | 7 d<br>M2/C2 | 7 d<br>M3/C3 | 10 d<br>M1/C1 | 10 d<br>M2/C2 | 10 d<br>M3/C3 |              |           |                                                                     |
| 1.066           | 1.111        | 1.135        | 0.987        | 1.054        | 1.038        | 0.976        | 0.942        | 1.040        | 1.000         | 1.006         | 0.916         | J3KN59       | BNIP2     | BCL2/adenovirus E1B 19 kDa protein-interacting protein 2            |
| 0.949           | 0.926        | 0.980        | 1.012        | 0.948        | 0.993        | 0.988        | 1.080        | 1.049        | 1.086         | 1.008         | 1.152         | A0A0J9YW18   | BNIP3     | BCL2/adenovirus E1B 19 kDa protein-interacting protein 3 (Fragment) |
| 0.968           | 0.930        | 1.017        |              |              |              |              |              |              |               |               |               | O60238       | BNIP3L    | BCL2/adenovirus E1B 19 kDa protein-interacting protein 3-like       |
| 1.004           | 1.024        | 0.986        | 1.008        | 0.956        | 0.992        | 1.051        | 1.017        | 0.983        | 1.099         | 1.042         | 1.122         | Q92934       | BAD       | Bcl2-associated agonist of cell death                               |
| 1.101           | 0.955        | 1.013        | 0.986        | 0.909        | 1.026        | 0.970        | 1.003        | 0.982        |               |               |               | E9PK91       | BCLAF1    | Bcl-2-associated transcription factor 1                             |
| 0.999           | 1.008        | 0.991        | 0.995        | 0.966        | 0.968        | 1.011        | 0.925        | 0.983        | 1.033         | 1.029         | 1.037         | Q9NYF8       | BCLAF1    | Bcl-2-associated transcription factor 1                             |
|                 |              |              | 1.002        | 1.163        | 0.958        | 1.056        | 1.015        | 0.990        | 1.156         | 0.995         | 1.119         | Q9BXH1       | BBC3      | Bcl-2-binding component 3                                           |
| 0.990           | 1.012        | 1.014        | 0.957        | 0.919        | 1.092        | 1.074        | 1.076        | 1.020        | 1.032         | 0.984         | 1.054         | Q07817       | BCL2L1    | Bcl-2-like protein 1                                                |
| 0.754           | 0.832        | 0.906        | 0.956        | 1.010        | 0.908        | 1.044        | 1.226        | 1.283        |               |               |               | Q9HB09       | BCL2L12   | Bcl-2-like protein 12                                               |
| 0.961           | 0.987        | 1.042        | 0.972        | 0.940        | 1.033        | 0.969        | 0.945        | 0.987        | 1.078         | 1.017         | 1.036         | Q9B XK5      | BCL2L13   | Bcl-2-like protein 13                                               |
| 1.069           | 1.128        | 1.055        | 0.841        | 0.670        | 1.093        |              |              |              |               |               |               | Q96LC9       | BMF       | Bcl-2-modifying factor                                              |
|                 |              |              | 0.961        | 0.961        | 1.118        | 0.921        | 0.812        | 1.203        | 0.905         | 1.016         | 1.021         | Q9UMX3       | BOK       | Bcl-2-related ovarian killer protein                                |
| 1.241           | 0.898        | 0.849        | 0.873        | 0.826        | 0.850        | 1.036        | 1.093        | 0.990        | 0.965         | 1.001         | 1.113         | Q6ZNE5       | ATG14     | Beclin 1-associated autophagy-related key regulator                 |
| 0.968           | 1.008        | 1.010        | 1.009        | 0.955        | 1.002        | 0.973        | 1.037        | 1.023        | 1.052         | 0.975         | 1.012         | Q14457       | BECN1     | Beclin-1                                                            |
| 1.096           | 1.016        | 1.046        | 0.999        | 0.924        | 1.075        | 1.009        | 0.986        | 1.158        | 0.978         | 1.043         | 1.088         | H7C1N3       | BET1      | BET1 homolog (Fragment)                                             |
|                 |              |              | 1.238        | 0.821        | 1.038        | 1.023        | 1.148        | 0.964        |               |               |               | B8ZZS0       | BET1L     | BET1-like protein                                                   |
| 0.711           | 0.886        | 1.056        | 0.858        | 0.683        | 1.005        |              |              |              |               |               |               | Q96L58       | B3GALT6   | Beta-1,3-galactosyltransferase 6                                    |
| 1.057           | 1.025        | 1.020        | 0.977        | 0.986        | 1.008        | 0.974        | 1.029        | 0.984        | 1.006         | 1.015         | 0.998         | Q6Y288       | B3GLCT    | Beta-1,3-glucosyltransferase                                        |
| 0.975           | 0.998        | 1.036        | 1.063        | 0.961        | 1.125        | 1.092        | 1.034        | 1.037        |               |               |               | Q00973       | B4GALNT1  | Beta-1,4 N-acetylgalactosaminyltransferase 1                        |
| 0.965           | 0.983        | 1.057        | 0.885        | 0.833        | 1.014        | 1.013        | 1.088        | 0.968        | 1.037         | 0.994         | 1.000         | P15291       | B4GALT1   | Beta-1,4-galactosyltransferase 1                                    |
|                 |              |              |              |              |              |              |              |              | 1.610         | 1.010         | 1.049         | O60512       | B4GALT3   | Beta-1,4-galactosyltransferase 3                                    |
| 1.030           | 0.992        | 0.916        | 0.985        | 0.890        | 0.983        | 0.989        | 0.883        | 0.968        | 0.971         | 0.992         | 1.080         | O60513       | B4GALT4   | Beta-1,4-galactosyltransferase 4                                    |
| 1.191           | 0.977        | 1.109        | 1.014        | 0.805        | 0.934        | 1.233        | 1.096        | 0.870        | 1.091         | 1.192         | 1.042         | O43286       | B4GALT5   | Beta-1,4-galactosyltransferase 5                                    |
|                 |              |              | 1.067        | 0.797        | 0.912        |              |              |              | 0.946         | 0.868         | 0.980         | Q9UBX8       | B4GALT6   | Beta-1,4-galactosyltransferase 6                                    |
| 0.912           | 1.051        | 1.156        | 0.907        | 0.908        | 0.931        | 0.874        | 1.054        | 1.126        | 1.012         | 1.034         | 1.041         | Q9UBV7       | B4GALT7   | Beta-1,4-galactosyltransferase 7                                    |
| 1.211           | 0.913        | 1.016        | 0.997        | 0.789        | 0.936        | 1.030        | 0.946        | 0.988        |               |               |               | O43505       | B4GAT1    | Beta-1,4-glucuronyltransferase 1                                    |
| 0.994           | 1.047        | 1.063        | 0.963        | 1.002        | 0.971        | 0.927        | 0.988        | 0.943        | 0.940         | 0.943         | 1.007         | P61769       | B2M       | Beta-2-microglobulin                                                |
| 0.950           | 0.993        | 0.999        | 0.961        | 0.941        | 0.994        | 1.008        | 1.017        | 0.997        | 0.997         | 0.974         | 1.020         | Q13425       | SNTB2     | Beta-2-syntrophin                                                   |
| 1.073           | 1.020        | 0.954        | 1.017        | 0.993        | 0.929        | 0.945        | 1.048        | 0.987        | 0.968         | 0.964         | 1.146         | Q562R1       | ACTBL2    | Beta-actin-like protein 2                                           |
| 0.983           | 0.995        | 1.067        | 1.021        | 0.966        | 1.074        | 0.986        | 1.004        | 1.054        | 0.964         | 0.959         | 1.088         | P25098       | GRK2      | Beta-adrenergic receptor kinase 1                                   |
|                 |              |              | 1.195        | 1.117        | 1.102        | 0.891        | 1.278        | 1.072        |               |               |               | P35626       | GRK3      | Beta-adrenergic receptor kinase 2                                   |

| Abundance Ratio |              |              |              |              |              |              |              |              |               |               |               | Accession ID | Gene name | Protein Description                                                                |
|-----------------|--------------|--------------|--------------|--------------|--------------|--------------|--------------|--------------|---------------|---------------|---------------|--------------|-----------|------------------------------------------------------------------------------------|
| 1 d<br>M1/C1    | 1 d<br>M2/C2 | 1 d<br>M3/C3 | 4 d<br>M1/C1 | 4 d<br>M2/C2 | 4 d<br>M3/C3 | 7 d<br>M1/C1 | 7 d<br>M2/C2 | 7 d<br>M3/C3 | 10 d<br>M1/C1 | 10 d<br>M2/C2 | 10 d<br>M3/C3 |              |           |                                                                                    |
| 1.043           | 0.965        | 1.007        | 0.962        | 1.056        | 0.924        | 0.997        | 0.905        | 1.063        | 1.075         | 0.986         | 1.025         | P49407       | ARRB1     | Beta-arrestin-1                                                                    |
| 0.877           | 1.184        | 1.073        | 0.989        | 0.994        | 1.065        | 0.964        | 0.936        | 1.069        | 0.900         | 0.941         | 0.894         | Q9NSA3       | CTNNBIP1  | Beta-catenin-interacting protein 1                                                 |
| 0.932           | 0.980        | 0.987        | 0.970        | 0.953        | 1.021        | 0.992        | 1.017        | 0.957        | 0.974         | 0.991         | 1.023         | A0A087WUB9   | CTNNBL1   | Beta-catenin-like protein 1                                                        |
| 0.958           | 1.000        | 1.064        | 0.992        | 0.964        | 0.992        | 0.957        | 0.921        | 0.950        | 1.038         | 0.986         | 1.047         | P42025       | ACTR1B    | Beta-centractin                                                                    |
| 1.022           | 1.100        | 1.006        | 1.000        | 0.910        | 0.892        | 0.947        | 1.159        | 0.995        | 1.056         | 0.971         | 1.124         | P13929       | ENO3      | Beta-enolase                                                                       |
| 1.013           | 1.009        | 0.999        | 1.003        | 1.028        | 0.985        | 1.025        | 1.052        | 0.999        | 1.014         | 0.981         | 0.995         | P16278       | GLB1      | Beta-galactosidase                                                                 |
| 1.034           | 0.990        | 1.009        | 0.968        | 0.939        | 1.023        | 1.022        | 1.032        | 1.018        | 1.028         | 0.993         | 1.009         | P08236       | GUSB      | Beta-glucuronidase                                                                 |
| 0.989           | 0.983        | 0.984        | 1.014        | 1.004        | 1.045        | 1.040        | 1.057        | 1.047        | 1.059         | 0.989         | 1.060         | H3BP20       | HEXA      | Beta-hexosaminidase                                                                |
| 1.011           | 0.993        | 0.997        | 1.015        | 0.996        | 1.026        | 1.012        | 1.050        | 1.013        | 1.043         | 1.036         | 0.970         | P07686       | HEXB      | Beta-hexosaminidase subunit beta                                                   |
| 0.978           | 1.005        | 0.987        | 1.035        | 0.935        | 1.002        | 1.026        | 1.193        | 1.076        | 1.058         | 1.045         | 1.076         | O00462       | MANBA     | Beta-mannosidase                                                                   |
| 1.001           | 0.986        | 0.997        | 0.981        | 0.921        | 1.021        | 1.002        | 1.059        | 1.020        | 1.014         | 0.882         | 1.050         | Q9HBI1       | PARVB     | Beta-parvin                                                                        |
|                 |              |              |              |              |              |              |              |              | 1.035         | 1.021         | 1.138         | Q9H115       | NAPB      | Beta-soluble NSF attachment protein                                                |
| 1.031           | 1.036        | 0.996        | 1.025        | 1.033        | 0.988        | 1.023        | 1.035        | 0.994        | 1.024         | 1.016         | 0.993         | O43252       | PAPSS1    | Bifunctional 3'-phosphoadenosine 5'-phosphosulfate synthase 1                      |
| 0.989           | 1.003        | 0.986        | 1.007        | 1.012        | 0.987        | 0.982        | 0.995        | 0.994        | 0.975         | 1.004         | 0.962         | P07814       | EPRS      | Bifunctional glutamate/proline--tRNA ligase                                        |
| 1.008           | 1.074        | 1.173        | 1.052        | 0.785        | 1.146        | 0.979        | 1.056        | 0.957        | 0.996         | 1.087         | 1.017         | P52848       | NDST1     | Bifunctional heparan sulfate N-deacetylase/N-sulfotransferase 1                    |
| 1.416           | 0.956        | 1.057        | 1.193        | 0.888        | 0.980        |              |              |              |               |               |               | P52849       | NDST2     | Bifunctional heparan sulfate N-deacetylase/N-sulfotransferase 2                    |
| 1.023           | 1.000        | 1.031        | 1.015        | 1.030        | 1.049        | 0.985        | 1.028        | 1.046        | 0.981         | 1.018         | 1.020         | P13995       | MTHFD2    | Bifunctional methylenetetrahydrofolate dehydrogenase/cyclohydrolase, mitochondrial |
| 1.012           | 1.026        | 1.024        | 1.004        | 0.977        | 1.042        | 0.989        | 1.000        | 1.010        | 1.046         | 1.023         | 1.066         | Q96T60       | PNKP      | Bifunctional polynucleotide phosphatase/kinase                                     |
| 1.002           | 1.055        | 1.085        | 0.756        | 0.929        | 1.077        | 1.221        | 1.204        | 0.951        |               |               |               | A0A0D9SFL2   | PNKP      | Bifunctional polynucleotide phosphatase/kinase                                     |
| 1.027           | 1.005        | 1.002        | 1.023        | 1.071        | 0.970        | 0.990        | 1.021        | 1.019        | 0.970         | 1.006         | 0.958         | P31939       | ATIC      | Bifunctional purine biosynthesis protein PURH                                      |
| 0.850           | 1.017        | 1.008        | 1.015        | 1.061        | 1.126        | 1.051        | 0.926        | 1.060        | 0.972         | 1.034         | 1.187         | O95342       | ABCB11    | Bile salt export pump                                                              |
| 0.991           | 1.001        | 0.994        | 0.985        | 0.978        | 1.040        | 1.004        | 1.042        | 1.019        | 0.982         | 0.968         | 1.033         | P53004       | BLVRA     | Biliverdin reductase A                                                             |
| 1.081           | 1.034        | 0.959        | 0.975        | 1.015        | 0.957        | 0.966        | 1.066        | 0.997        | 0.996         | 0.973         | 0.976         | P78537       | BLOC1S1   | Biogenesis of lysosome-related organelles complex 1 subunit 1                      |
| 1.007           | 0.952        | 1.032        | 1.021        | 1.018        | 0.994        | 1.094        | 1.082        | 0.948        | 1.074         | 1.026         | 1.207         | Q6QNY1       | BLOC1S2   | Biogenesis of lysosome-related organelles complex 1 subunit 2                      |
| 1.017           | 0.954        | 1.045        | 1.039        | 1.007        | 1.022        | 1.035        | 0.991        | 1.022        | 1.063         | 0.987         | 1.027         | Q6QNY0       | BLOC1S3   | Biogenesis of lysosome-related organelles complex 1 subunit 3                      |
| 1.058           | 1.060        | 1.051        | 1.062        | 0.924        | 0.991        | 0.993        | 1.135        | 0.931        | 0.969         | 1.023         | 0.995         | Q9NUP1       | BLOC1S4   | Biogenesis of lysosome-related organelles complex 1 subunit 4                      |
| 1.130           | 1.104        | 1.175        | 1.013        | 0.959        | 1.075        | 1.047        | 0.966        | 1.005        | 1.055         | 1.032         | 1.084         | Q8TDH9       | BLOC1S5   | Biogenesis of lysosome-related organelles complex 1 subunit 5                      |

| Abundance Ratio |              |              |              |              |              |              |              |              |               |               |               | Accession ID | Gene name   | Protein Description                                                         |
|-----------------|--------------|--------------|--------------|--------------|--------------|--------------|--------------|--------------|---------------|---------------|---------------|--------------|-------------|-----------------------------------------------------------------------------|
| 1 d<br>M1/C1    | 1 d<br>M2/C2 | 1 d<br>M3/C3 | 4 d<br>M1/C1 | 4 d<br>M2/C2 | 4 d<br>M3/C3 | 7 d<br>M1/C1 | 7 d<br>M2/C2 | 7 d<br>M3/C3 | 10 d<br>M1/C1 | 10 d<br>M2/C2 | 10 d<br>M3/C3 |              |             |                                                                             |
| 1.078           | 0.970        | 1.102        | 1.018        | 1.075        | 1.090        | 0.930        | 0.976        | 1.066        | 0.974         | 1.153         | 1.074         | H3BST1       | BLOC1S6     | Biogenesis of lysosome-related organelles complex 1 subunit 6               |
| 1.139           | 1.080        | 0.912        | 1.336        | 1.701        | 0.930        |              |              |              | 1.110         | 0.989         | 1.123         | C9JNZ5       | BOD1        | Biorientation of chromosomes in cell division protein 1                     |
| 0.994           | 0.898        | 0.994        | 0.930        | 0.966        | 1.086        | 0.963        | 1.011        | 1.006        | 0.893         | 1.040         | 0.993         | Q96IK1       | BOD1        | Biorientation of chromosomes in cell division protein 1                     |
| 1.007           | 1.001        | 1.029        | 0.978        | 0.949        | 1.003        | 0.972        | 1.000        | 0.970        | 1.044         | 1.034         | 1.089         | Q8NFC6       | BOD1L1      | Biorientation of chromosomes in cell division protein 1-like 1              |
| 1.079           | 1.028        | 1.059        | 1.008        | 0.948        | 1.078        | 1.058        | 1.049        | 0.976        | 1.058         | 1.074         | 1.130         | P50747       | HLCS        | Biotin--protein ligase                                                      |
| 0.977           | 1.025        | 1.031        | 1.110        | 1.043        | 1.171        | 1.185        | 1.154        | 1.159        | 1.168         | 1.131         | 1.089         | Q9Y6X5       | ENPP4       | Bis(5'-adenosyl)-triphosphatase ENPP4                                       |
|                 |              |              |              |              |              | 0.989        | 0.475        | 0.979        |               |               |               | P49789       | FHIT        | Bis(5'-adenosyl)-triphosphatase                                             |
| 1.056           | 0.988        | 0.988        | 0.999        | 1.039        | 1.035        | 1.033        | 1.071        | 1.033        | 0.972         | 1.008         | 1.001         | P50583       | NUDT2       | Bis(5'-nucleosyl)-tetraphosphatase [asymmetrical]                           |
| 1.194           | 1.126        | 1.091        | 0.974        | 1.009        | 1.014        | 0.861        | 1.121        | 1.089        | 0.979         | 0.991         | 1.093         | P07738       | BPGM        | Bisphosphoglycerate mutase                                                  |
| 1.020           | 1.018        | 1.019        | 1.016        | 1.011        | 1.015        | 1.028        | 1.093        | 0.999        | 1.013         | 1.031         | 1.051         | Q13867       | BLMH        | Bleomycin hydrolase                                                         |
| 1.022           | 0.961        | 1.014        | 1.179        | 0.989        | 1.054        | 1.102        | 1.065        | 1.056        | 1.102         | 0.939         | 1.145         | Q969J3       | BORCS5      | BLOC-1-related complex subunit 5                                            |
| 1.021           | 1.074        | 0.981        | 1.021        | 0.887        | 0.981        | 1.028        | 1.110        | 0.957        | 1.099         | 1.020         | 1.076         | Q96GS4       | BORCS6      | BLOC-1-related complex subunit 6                                            |
| 1.012           | 0.944        | 1.070        | 0.922        | 0.880        | 1.026        | 0.912        | 1.275        | 0.979        |               |               |               | Q96FH0       | BORCS8      | BLOC-1-related complex subunit 8                                            |
| 0.825           | 1.128        | 1.079        | 1.008        | 0.949        | 1.184        | 1.020        | 0.641        | 0.922        | 1.022         | 0.940         | 1.164         | P54132       | BLM         | Bloom syndrome protein                                                      |
| 1.020           | 1.011        | 1.018        | 1.012        | 0.956        | 1.032        | 1.031        | 1.016        | 1.003        | 1.006         | 1.020         | 1.092         | Q9NSY1       | BMP2K       | BMP-2-inducible protein kinase                                              |
| 1.052           | 0.928        | 1.123        | 0.714        | 0.970        | 0.856        | 0.989        | 0.970        | 1.012        | 1.091         | 1.009         | 1.154         | Q9Y3E2       | BOLA1       | BolA-like protein 1                                                         |
| 1.041           | 0.989        | 0.985        | 0.987        | 1.065        | 0.994        | 1.031        | 1.029        | 1.002        | 0.994         | 0.984         | 1.012         | A0A087WZT3   | BOLA2       | BolA-like protein 2                                                         |
| 1.054           | 0.994        | 1.003        | 0.995        | 1.027        | 0.947        | 1.012        | 0.929        | 1.066        | 1.012         | 1.094         | 1.112         | Q53S33       | BOLA3       | BolA-like protein 3                                                         |
|                 |              |              | 0.992        | 1.273        | 0.959        |              |              |              |               |               |               | P22004       | BMP6        | Bone morphogenetic protein 6                                                |
| 1.100           | 0.985        | 0.982        |              |              |              | 0.903        | 0.956        | 1.093        |               |               |               | Q13873       | BMPR2       | Bone morphogenetic protein receptor type-2                                  |
| 1.055           | 1.049        | 1.056        | 1.108        | 0.987        | 0.959        | 0.939        | 1.163        | 0.919        | 1.039         | 1.178         | 1.173         | A0A0B4J1R7   | BORCS7-ASMT | BORCS7-ASMT readthrough (NMD candidate)                                     |
| 0.972           | 1.024        | 1.042        | 0.938        | 0.804        | 0.953        |              |              |              | 0.873         | 1.041         | 1.155         | Q53HL2       | CDCA8       | Borealin                                                                    |
| 1.022           | 0.973        | 0.978        | 1.048        | 0.952        | 1.049        | 1.024        | 0.998        | 1.003        | 1.042         | 1.032         | 1.069         | Q9NWK9       | ZNHIT6      | Box C/D snoRNA protein 1                                                    |
|                 |              |              | 1.014        | 0.942        | 1.037        |              |              |              |               |               |               | P59826       | BPIFB3      | BPI fold-containing family B member 3                                       |
| 1.013           | 0.985        | 0.956        | 0.859        | 0.952        | 0.994        | 0.979        | 0.768        | 0.885        | 1.201         | 1.037         | 1.019         | P80723       | BASP1       | Brain acid soluble protein 1                                                |
|                 |              |              |              |              |              | 1.049        | 0.992        | 1.027        | 0.781         | 1.437         | 0.778         | O95415       | BRI3        | Brain protein I3                                                            |
| 1.020           | 1.015        | 0.995        | 1.027        | 0.977        | 1.032        | 1.005        | 1.043        | 0.988        | 0.960         | 1.031         | 1.022         | Q9UQB8       | BAIAP2      | Brain-specific angiogenesis inhibitor 1-associated protein 2                |
| 0.992           | 1.008        | 0.991        | 0.995        | 0.973        | 0.976        | 1.037        | 1.020        | 0.984        | 1.011         | 0.952         | 1.077         | Q9UHR4       | BAIAP2L1    | Brain-specific angiogenesis inhibitor 1-associated protein 2-like protein 1 |
| 1.004           | 1.015        | 0.927        | 1.025        | 1.022        | 0.987        | 1.060        | 1.069        | 1.008        | 1.057         | 0.991         | 0.999         | O15382       | BCAT2       | Branched-chain-amino-acid aminotransferase, mitochondrial                   |

| Abundance Ratio |              |              |              |              |              |              |              |              |               |               |               | Accession ID | Gene name | Protein Description                                              |
|-----------------|--------------|--------------|--------------|--------------|--------------|--------------|--------------|--------------|---------------|---------------|---------------|--------------|-----------|------------------------------------------------------------------|
| 1 d<br>M1/C1    | 1 d<br>M2/C2 | 1 d<br>M3/C3 | 4 d<br>M1/C1 | 4 d<br>M2/C2 | 4 d<br>M3/C3 | 7 d<br>M1/C1 | 7 d<br>M2/C2 | 7 d<br>M3/C3 | 10 d<br>M1/C1 | 10 d<br>M2/C2 | 10 d<br>M3/C3 |              |           |                                                                  |
| 1.026           | 1.107        | 1.029        | 0.994        | 0.910        | 0.950        | 1.025        | 1.007        | 1.103        | 1.097         | 1.026         | 1.026         | Q6UWZ7       | FAM175A   | BRCA1-A complex subunit Abraxas                                  |
| 1.045           | 1.016        | 1.013        | 1.021        | 1.012        | 1.005        | 0.982        | 1.051        | 0.980        | 0.997         | 0.999         | 0.990         | Q9NXR7       | BRE       | BRCA1-A complex subunit BRE                                      |
| 0.942           | 0.878        | 1.078        | 0.918        | 0.928        | 1.032        | 0.964        | 0.921        | 1.093        | 1.035         | 1.065         | 1.165         | Q96RL1       | UIMC1     | BRCA1-A complex subunit RAP80                                    |
| 1.019           | 0.970        | 1.025        | 1.114        | 1.024        | 0.845        | 0.992        | 0.984        | 1.123        | 0.991         | 0.899         | 1.095         | Q6PJG6       | BRAT1     | BRCA1-associated ATM activator 1                                 |
| 1.077           | 0.938        | 1.022        | 1.046        | 0.894        | 1.068        | 1.155        | 0.912        | 0.962        | 1.136         | 0.867         | 1.110         | Q7Z569       | BRAP      | BRCA1-associated protein                                         |
| 0.995           | 0.978        | 1.001        | 0.905        | 0.914        | 1.082        | 1.011        | 1.157        | 1.164        |               |               |               | Q99728       | BARD1     | BRCA1-associated RING domain protein 1                           |
| 1.035           | 1.009        | 1.016        | 1.015        | 0.955        | 1.061        | 0.955        | 1.094        | 1.034        | 0.900         | 0.998         | 0.952         | Q9P287       | BCCIP     | BRCA2 and CDKN1A-interacting protein                             |
| 1.037           | 0.984        | 0.993        | 1.009        | 0.927        | 0.987        | 0.972        | 0.991        | 1.037        | 1.002         | 0.963         | 1.056         | P11274       | BCR       | Breakpoint cluster region protein                                |
| 1.006           | 1.056        | 1.000        |              |              |              |              |              |              |               |               |               | Q05GC8       | BCAR2     | Breast cancer anti-estrogen resistance 2                         |
| 1.066           | 1.006        | 1.047        | 1.019        | 0.952        | 1.009        | 0.998        | 1.063        | 0.987        | 0.986         | 0.956         | 1.030         | O75815       | BCAR3     | Breast cancer anti-estrogen resistance protein 3                 |
| 1.162           | 1.069        | 1.108        |              |              |              |              |              |              |               |               |               | G5E9I4       | BRMS1     | Breast cancer metastasis suppressor 1, isoform CRA_c             |
| 0.997           | 0.943        | 0.831        | 0.971        | 1.013        | 1.104        |              |              |              | 0.995         | 1.025         | 0.981         | Q5PSV4       | BRMS1L    | Breast cancer metastasis-suppressor 1-like protein               |
| 1.032           | 1.008        | 0.982        | 0.996        | 0.944        | 0.989        | 1.011        | 1.058        | 0.996        | 1.017         | 1.019         | 1.004         | Q9H6U6       | BCAS3     | Breast carcinoma-amplified sequence 3                            |
| 1.025           | 1.004        | 1.029        | 1.000        | 0.956        | 1.031        | 1.024        | 1.023        | 1.056        | 1.006         | 0.976         | 1.072         | Q9Y6D6       | ARFGEF1   | Brefeldin A-inhibited guanine nucleotide-exchange protein 1      |
| 0.988           | 1.001        | 1.001        | 1.000        | 0.983        | 1.046        | 1.021        | 1.036        | 1.011        | 0.994         | 1.013         | 1.024         | Q9Y6D5       | ARFGEF2   | Brefeldin A-inhibited guanine nucleotide-exchange protein 2      |
| 1.007           | 1.054        | 1.013        | 0.954        | 0.957        | 0.999        | 1.036        | 1.166        | 1.024        |               |               |               | Q5TH69       | ARFGEF3   | Brefeldin A-inhibited guanine nucleotide-exchange protein 3      |
| 0.927           | 0.940        | 0.934        | 0.900        | 0.946        | 1.000        | 1.072        | 1.130        | 1.028        | 1.037         | 1.053         | 1.014         | Q8WY22       | BRI3BP    | BRI3-binding protein                                             |
| 0.771           | 0.899        | 1.562        | 0.943        | 0.896        | 1.043        | 1.004        | 0.839        | 1.021        | 0.968         | 0.885         | 1.021         | Q9NQY0       | BIN3      | Bridging integrator 3                                            |
| 0.968           | 0.971        | 1.022        | 0.993        | 0.951        | 0.979        | 1.007        | 0.930        | 0.997        | 1.001         | 0.977         | 1.028         | Q9NWV8       | BABAM1    | BRISC and BRCA1-A complex member 1                               |
| 1.036           | 1.018        | 0.979        | 0.979        | 0.946        | 0.941        | 0.992        | 1.052        | 0.959        | 1.048         | 0.995         | 0.995         | Q15018       | FAM175B   | BRISC complex subunit Abro1                                      |
| 1.014           | 1.004        | 1.029        | 1.011        | 0.994        | 0.977        | 1.000        | 1.064        | 1.007        | 1.045         | 1.013         | 1.042         | Q5VW32       | BROX      | BRO1 domain-containing protein BROX                              |
| 0.981           | 1.013        | 1.016        | 1.030        | 0.967        | 1.049        | 1.039        | 0.939        | 1.009        | 1.014         | 0.965         | 1.051         | Q9NRL2       | BAZ1A     | Bromodomain adjacent to zinc finger domain protein 1A            |
| 1.012           | 1.001        | 1.004        | 0.975        | 0.912        | 1.008        | 1.055        | 1.076        | 1.021        | 1.111         | 1.004         | 1.042         | Q9UIF9       | BAZ2A     | Bromodomain adjacent to zinc finger domain protein 2A            |
| 2.230           | 2.465        | 2.096        | 1.921        | 1.869        | 2.236        | 2.783        | 3.041        | 2.671        |               |               |               | H7B XK5      | BAZ2B     | Bromodomain adjacent to zinc finger domain protein 2B (Fragment) |
| 1.017           | 0.940        | 0.878        |              |              |              | 0.709        | 1.239        | 1.104        |               |               |               | Q9UIF8       | BAZ2B     | Bromodomain adjacent to zinc finger domain protein 2B            |
| 1.022           | 1.127        | 0.990        | 1.155        | 0.693        | 0.937        | 1.342        | 1.096        | 0.825        | 1.179         | 0.940         | 1.123         | Q9ULD4       | BRPF3     | Bromodomain and PHD finger-containing protein 3                  |
| 1.027           | 1.009        | 0.979        | 1.143        | 0.905        | 1.010        | 1.121        | 1.041        | 1.034        | 0.982         | 0.992         | 1.029         | A0A0G2JK44   | BRD2      | Bromodomain-containing protein 2                                 |



| Abundance Ratio |              |              |              |              |              |              |              |              |               |               |               | Accession ID | Gene name | Protein Description                                                            |
|-----------------|--------------|--------------|--------------|--------------|--------------|--------------|--------------|--------------|---------------|---------------|---------------|--------------|-----------|--------------------------------------------------------------------------------|
| 1 d<br>M1/C1    | 1 d<br>M2/C2 | 1 d<br>M3/C3 | 4 d<br>M1/C1 | 4 d<br>M2/C2 | 4 d<br>M3/C3 | 7 d<br>M1/C1 | 7 d<br>M2/C2 | 7 d<br>M3/C3 | 10 d<br>M1/C1 | 10 d<br>M2/C2 | 10 d<br>M3/C3 |              |           |                                                                                |
| 0.979           | 0.980        | 1.030        | 0.982        | 0.977        | 1.043        | 1.001        | 1.005        | 1.122        | 1.006         | 0.933         | 1.110         | Q15059       | BRD3      | Bromodomain-containing protein 3                                               |
| 1.048           | 1.012        | 1.023        | 0.990        | 0.961        | 0.993        | 1.054        | 1.087        | 1.020        | 0.970         | 0.973         | 1.008         | O60885       | BRD4      | Bromodomain-containing protein 4                                               |
| 0.977           | 0.948        | 0.987        | 0.975        | 0.994        | 0.972        | 1.013        | 1.113        | 1.006        | 0.965         | 1.038         | 1.001         | Q9H8M2       | BRD9      | Bromodomain-containing protein 9                                               |
| 1.072           | 1.013        | 0.981        | 1.043        | 1.118        | 0.922        | 0.991        | 0.991        | 1.021        | 0.953         | 0.971         | 1.006         | Q9NW68       | BSDC1     | BSD domain-containing protein 1                                                |
|                 |              |              |              |              |              |              |              |              | 1.053         | 0.879         | 1.214         | Q13829       | TNFAIP1   | BTB/POZ domain-containing adapter for CUL3-mediated RhoA degradation protein 2 |
| 1.022           | 0.976        | 1.038        | 1.004        | 0.920        | 1.043        | 1.030        | 1.100        | 0.986        | 1.103         | 0.986         | 1.064         | Q9H3F6       | KCTD10    | BTB/POZ domain-containing adapter for CUL3-mediated RhoA degradation protein 3 |
| 1.301           | 0.988        | 0.999        | 1.043        | 1.006        | 0.985        | 0.968        | 0.878        | 0.921        | 1.453         | 0.979         | 1.081         | Q9H0C5       | BTBD1     | BTB/POZ domain-containing protein 1                                            |
| 0.902           | 0.935        | 1.020        | 0.952        | 0.684        | 0.866        | 0.960        | 0.851        | 1.028        |               |               |               | Q9BX70       | BTBD2     | BTB/POZ domain-containing protein 2                                            |
| 1.043           | 1.036        | 0.953        | 1.105        | 0.887        | 1.175        | 1.002        | 1.173        | 1.108        | 1.037         | 0.933         | 1.069         | J3QRK1       | KCTD1     | BTB/POZ domain-containing protein KCTD1 (Fragment)                             |
| 1.022           | 0.979        | 0.988        | 0.988        | 0.954        | 0.961        | 1.058        | 0.968        | 0.978        | 1.057         | 0.989         | 1.023         | Q96CX2       | KCTD12    | BTB/POZ domain-containing protein KCTD12                                       |
| 1.067           | 1.059        | 0.952        | 1.027        | 0.959        | 1.010        | 1.007        | 1.098        | 0.997        | 1.068         | 0.984         | 1.022         | Q9BQ13       | KCTD14    | BTB/POZ domain-containing protein KCTD14                                       |
| 0.849           | 1.000        | 1.653        | 0.846        | 0.870        | 0.965        | 0.929        | 1.004        | 1.251        | 1.054         | 1.065         | 1.006         | Q96SI1       | KCTD15    | BTB/POZ domain-containing protein KCTD15                                       |
| 1.020           | 0.933        | 1.013        | 0.960        | 0.918        | 1.030        | 1.103        | 0.910        | 1.051        | 1.058         | 1.175         | 1.042         | Q6PI47       | KCTD18    | BTB/POZ domain-containing protein KCTD18                                       |
| 1.206           | 1.008        | 0.960        |              |              |              | 1.058        | 1.188        | 0.996        | 0.950         | 0.939         | 0.925         | Q14681       | KCTD2     | BTB/POZ domain-containing protein KCTD2                                        |
| 1.077           | 1.007        | 1.063        | 1.016        | 1.060        | 1.018        | 1.037        | 1.037        | 1.035        | 1.013         | 0.904         | 0.924         | Q4G0X4       | KCTD21    | BTB/POZ domain-containing protein KCTD21                                       |
| 0.911           | 0.948        | 1.037        | 1.072        | 0.957        | 1.025        |              |              |              |               |               |               | Q9Y597       | KCTD3     | BTB/POZ domain-containing protein KCTD3                                        |
| 1.086           | 1.051        | 0.951        | 1.043        | 1.039        | 0.958        | 1.021        | 1.099        | 0.943        | 0.895         | 1.101         | 0.942         | Q9NXV2       | KCTD5     | BTB/POZ domain-containing protein KCTD5                                        |
| 1.035           | 1.010        | 1.053        | 0.799        | 0.746        | 1.032        | 1.012        | 1.135        | 1.046        | 1.008         | 0.987         | 1.026         | Q7L273       | KCTD9     | BTB/POZ domain-containing protein KCTD9                                        |
| 1.011           | 1.012        | 0.991        | 1.014        | 1.173        | 1.020        | 1.035        | 0.940        | 0.999        | 1.047         | 0.982         | 1.038         | X6R4W8       | ZNF207    | BUB3-interacting and GLEBS motif-containing protein ZNF207                     |
| 1.004           | 0.961        | 0.988        | 1.032        | 0.816        | 1.102        | 1.030        | 1.018        | 1.007        | 1.086         | 0.988         | 1.022         | Q9BRD0       | BUD13     | BUD13 homolog                                                                  |
| 1.015           | 0.989        | 1.014        | 0.985        | 0.982        | 1.016        | 1.030        | 1.076        | 1.043        | 1.041         | 1.051         | 1.017         | Q13895       | BYSL      | Bystin                                                                         |
| 1.039           | 1.006        | 1.067        | 0.931        | 0.895        | 0.949        | 1.005        | 1.156        | 0.949        | 1.149         | 1.061         | 1.130         | Q96EU7       | C1GALT1C1 | C1GALT1-specific chaperone 1                                                   |
| 0.977           | 1.007        | 0.988        | 0.986        | 0.994        | 0.995        | 0.980        | 1.016        | 0.991        | 0.973         | 0.983         | 0.989         | P11586       | MTHFD1    | C-1-tetrahydrofolate synthase, cytoplasmic                                     |
| 0.934           | 0.755        | 1.029        | 1.161        | 1.011        | 0.965        |              |              |              | 0.961         | 0.956         | 1.233         | Q8TF44       | C2CD4C    | C2 calcium-dependent domain-containing protein 4C                              |
| 0.856           | 0.983        | 0.956        | 0.975        | 0.928        | 1.135        | 0.936        | 1.046        | 1.037        | 0.995         | 1.109         | 0.949         | Q9Y426       | C2CD2     | C2 domain-containing protein 2                                                 |
| 0.764           | 1.054        | 0.973        |              |              |              |              |              |              |               |               |               | Q4AC94       | C2CD3     | C2 domain-containing protein 3                                                 |
| 0.930           | 0.987        | 0.977        | 0.973        | 0.899        | 1.018        | 1.014        | 1.105        | 1.020        | 1.063         | 1.048         | 1.019         | O75844       | ZMPSTE24  | CAAX prenyl protease 1 homolog                                                 |
|                 |              |              |              |              |              | 1.411        | 1.051        | 1.147        | 1.015         | 0.943         | 1.076         | Q9Y256       | RCE1      | CAAX prenyl protease 2                                                         |
| 0.973           | 0.997        | 1.008        | 0.995        | 0.961        | 0.994        | 0.957        | 0.994        | 1.010        | 1.027         | 1.009         | 0.984         | P27708       | CAD       | CAD protein                                                                    |
| 0.785           | 1.035        | 1.235        | 0.896        | 0.840        | 1.176        |              |              |              | 0.913         | 1.000         | 1.014         | Q9NYQ6       | CELSR1    | Cadherin EGF LAG seven-pass G-type receptor 1                                  |
| 1.053           | 0.955        | 1.011        | 1.049        | 0.991        | 0.997        | 1.199        | 0.967        | 1.006        | 0.991         | 0.977         | 1.030         | P55283       | CDH4      | Cadherin-4                                                                     |

| Abundance Ratio |              |              |              |              |              |              |              |              |               |               |               | Accession ID | Gene name | Protein Description                                               |
|-----------------|--------------|--------------|--------------|--------------|--------------|--------------|--------------|--------------|---------------|---------------|---------------|--------------|-----------|-------------------------------------------------------------------|
| 1 d<br>M1/C1    | 1 d<br>M2/C2 | 1 d<br>M3/C3 | 4 d<br>M1/C1 | 4 d<br>M2/C2 | 4 d<br>M3/C3 | 7 d<br>M1/C1 | 7 d<br>M2/C2 | 7 d<br>M3/C3 | 10 d<br>M1/C1 | 10 d<br>M2/C2 | 10 d<br>M3/C3 |              |           |                                                                   |
| 1.011           | 0.961        | 1.015        | 1.043        | 0.961        | 1.016        | 0.986        | 0.990        | 1.010        | 1.020         | 1.002         | 1.082         | Q99653       | CHP1      | Calcineurin B homologous protein 1                                |
| 0.979           | 0.995        | 1.001        | 0.968        | 0.951        | 0.999        | 1.019        | 1.067        | 1.003        | 0.957         | 0.971         | 0.962         | D3YTA9       | PPP3R1    | Calcineurin subunit B type 1                                      |
| 1.017           | 0.949        | 0.962        | 1.050        | 0.751        | 0.850        |              |              |              |               |               |               | Q9Y6J0       | CABIN1    | Calcineurin-binding protein cabin-1                               |
| 0.945           | 1.025        | 1.041        |              |              |              | 0.895        | 1.299        | 0.997        |               |               |               | Q9UKA8       | RCAN3     | Calcipressin-3                                                    |
| 0.932           | 0.897        | 0.950        | 0.825        | 0.971        | 1.055        | 0.792        | 0.987        | 0.809        |               |               |               | Q9UGQ2       | CACFD1    | Calcium channel flower homolog                                    |
| 0.958           | 0.970        | 0.970        | 1.005        | 0.982        | 1.025        | 1.006        | 0.988        | 1.006        | 0.967         | 0.975         | 0.974         | J3QK89       | CHERP     | Calcium homeostasis endoplasmic reticulum protein                 |
|                 |              |              | 1.040        | 0.963        | 1.040        | 1.046        | 0.937        | 1.275        | 1.174         | 1.232         | 0.969         | Q8IWX8       | CHERP     | Calcium homeostasis endoplasmic reticulum protein                 |
| 0.963           | 0.921        | 0.944        | 1.005        | 1.030        | 1.006        | 1.208        | 1.004        | 0.976        | 1.031         | 1.066         | 1.010         | J9JIE6       | TMCO1     | Calcium load-activated calcium channel                            |
| 0.910           | 0.932        | 0.990        | 0.925        | 0.851        | 1.042        | 0.967        | 1.056        | 1.080        | 1.017         | 0.907         | 1.122         | Q96D31       | ORAI1     | Calcium release-activated calcium channel protein 1               |
| 1.065           | 0.980        | 1.028        | 1.019        | 0.872        | 0.924        | 0.921        | 1.044        | 0.996        | 1.028         | 1.065         | 1.026         | P49069       | CAMLG     | Calcium signal-modulating cyclophilin ligand                      |
| 1.001           | 0.978        | 1.035        | 0.977        | 0.957        | 1.015        | 1.028        | 1.014        | 0.998        | 1.028         | 1.003         | 1.003         | Q8NE86       | MCU       | Calcium uniporter protein, mitochondrial                          |
| 0.983           | 0.988        | 1.004        | 1.000        | 0.899        | 0.992        | 1.012        | 1.101        | 0.980        | 1.052         | 1.014         | 1.040         | Q9NWR8       | MCUB      | Calcium uniporter regulatory subunit MCUB, mitochondrial          |
| 0.994           | 1.004        | 1.013        | 0.947        | 0.957        | 0.996        | 1.052        | 1.037        | 1.030        | 1.088         | 0.948         | 1.087         | A0A0U1RRK1   | MICU1     | Calcium uptake protein 1, mitochondrial                           |
| 0.993           | 0.989        | 1.002        | 0.975        | 0.987        | 0.983        | 1.049        | 0.956        | 1.012        | 1.094         | 0.991         | 1.046         | Q8IYU8       | MICU2     | Calcium uptake protein 2, mitochondrial                           |
| 1.010           | 1.015        | 1.063        | 1.024        | 1.020        | 1.050        | 1.046        | 0.914        | 1.049        | 0.902         | 1.065         | 1.064         | Q86XE3       | MICU3     | Calcium uptake protein 3, mitochondrial                           |
|                 |              |              | 0.927        | 0.976        | 1.265        |              |              |              |               |               |               | J3KPJ3       | CAMKK1    | Calcium/calmodulin-dependent protein kinase kinase 1              |
| 1.023           | 0.993        | 1.042        | 1.014        | 0.980        | 1.002        | 1.002        | 1.020        | 0.998        | 1.106         | 0.991         | 1.010         | Q96RR4       | CAMKK2    | Calcium/calmodulin-dependent protein kinase kinase 2              |
| 1.005           | 0.986        | 0.980        | 0.953        | 0.906        | 0.950        | 0.979        | 1.059        | 0.988        | 0.984         | 0.956         | 1.059         | Q14012       | CAMK1     | Calcium/calmodulin-dependent protein kinase type 1                |
| 1.015           | 1.012        | 0.975        | 1.007        | 0.968        | 1.006        | 0.982        | 1.029        | 0.977        | 0.999         | 0.985         | 0.975         | E9PBG7       | CAMK2D    | Calcium/calmodulin-dependent protein kinase type II subunit delta |
| 0.912           | 0.954        | 1.020        | 0.965        | 0.924        | 1.030        | 0.824        | 0.620        | 0.680        | 0.971         | 0.717         | 1.016         | Q16566       | CAMK4     | Calcium/calmodulin-dependent protein kinase type IV               |
| 1.015           | 1.003        | 1.062        | 1.028        | 0.972        | 1.047        | 0.953        | 0.948        | 1.049        |               |               |               | Q9P1Z2       | CALCOCO1  | Calcium-binding and coiled-coil domain-containing protein 1       |
| 1.012           | 1.001        | 1.022        | 0.993        | 0.975        | 1.004        | 1.041        | 1.053        | 1.037        | 1.024         | 0.990         | 1.001         | O75746       | SLC25A12  | Calcium-binding mitochondrial carrier protein Aralar1             |
| 0.985           | 0.987        | 0.957        | 1.009        | 1.005        | 1.008        | 1.025        | 1.034        | 0.996        | 1.070         | 0.989         | 1.002         | Q6NUK1       | SLC25A24  | Calcium-binding mitochondrial carrier protein SCaMC-1             |
| 0.997           | 1.054        | 1.081        | 0.971        | 0.907        | 1.028        | 0.978        | 1.006        | 0.993        | 0.999         | 0.964         | 1.115         | Q9BV35       | SLC25A23  | Calcium-binding mitochondrial carrier protein SCaMC-3             |
| 1.011           | 1.002        | 0.992        | 0.994        | 0.972        | 1.034        | 1.024        | 1.037        | 1.001        | 1.007         | 0.951         | 1.055         | Q9Y376       | CAB39     | Calcium-binding protein 39                                        |

| Abundance Ratio |              |              |              |              |              |              |              |              |               |               |               | Accession ID | Gene name | Protein Description                                   |
|-----------------|--------------|--------------|--------------|--------------|--------------|--------------|--------------|--------------|---------------|---------------|---------------|--------------|-----------|-------------------------------------------------------|
| 1 d<br>M1/C1    | 1 d<br>M2/C2 | 1 d<br>M3/C3 | 4 d<br>M1/C1 | 4 d<br>M2/C2 | 4 d<br>M3/C3 | 7 d<br>M1/C1 | 7 d<br>M2/C2 | 7 d<br>M3/C3 | 10 d<br>M1/C1 | 10 d<br>M2/C2 | 10 d<br>M3/C3 |              |           |                                                       |
| 1.066           | 1.027        | 1.102        | 1.034        | 1.009        | 0.985        | 1.056        | 0.983        | 0.871        | 0.941         | 1.017         | 0.973         | Q9H9S4       | CAB39L    | Calcium-binding protein 39-like                       |
| 1.067           | 1.072        | 1.027        | 1.105        | 1.114        | 1.073        | 1.134        | 1.164        | 0.985        | 1.080         | 0.849         | 0.964         | A0A087X1P3   | CADPS2    | Calcium-dependent secretion activator 2               |
| 1.053           | 1.041        | 1.094        | 1.027        | 0.969        | 1.003        | 1.043        | 1.102        | 0.974        | 1.072         | 0.994         | 1.007         | Q9NP80       | PNPLA8    | Calcium-independent phospholipase A2-gamma            |
| 1.024           | 0.995        | 0.968        | 0.972        | 0.967        | 0.960        | 0.989        | 0.950        | 0.964        | 1.008         | 0.935         | 0.993         | Q9Y2V2       | CARHSP1   | Calcium-regulated heat-stable protein 1               |
|                 |              |              | 0.914        | 0.954        | 1.079        | 0.994        | 0.910        | 1.038        | 1.099         | 1.030         | 1.102         | O75177       | SS18L1    | Calcium-responsive transactivator                     |
| 0.958           | 0.999        | 0.946        | 0.993        | 1.009        | 0.956        | 0.995        | 1.030        | 0.968        | 0.920         | 0.983         | 0.960         | Q9HB71       | CACYBP    | Calcyclin-binding protein                             |
|                 |              |              | 1.034        | 1.100        | 1.166        | 1.065        | 1.190        | 1.159        | 0.972         | 0.980         | 1.024         | Q96CP7       | TLCD1     | Calfacilitin                                          |
| 0.938           | 1.049        | 0.993        | 1.070        | 0.912        | 1.007        | 1.143        | 0.887        | 1.190        | 1.001         | 0.911         | 1.058         | O14967       | CLGN      | Calmeglin                                             |
| 1.045           | 0.954        | 1.072        | 1.024        | 0.960        | 1.025        | 1.000        | 0.992        | 0.990        | 1.000         | 1.021         | 1.107         | Q96JQ2       | CLMN      | Calmin                                                |
| 0.979           | 1.005        | 0.970        | 0.986        | 0.975        | 1.002        | 0.990        | 0.981        | 0.998        | 1.038         | 0.981         | 1.050         | E7EMB3       | CALM2     | Calmodulin                                            |
| 0.973           | 0.976        | 0.966        | 0.816        | 0.624        | 0.979        | 1.222        | 1.081        | 1.120        |               |               |               | P27482       | CALML3    | Calmodulin-like protein 3                             |
|                 |              |              |              |              |              |              |              |              | 0.845         | 0.946         | 0.988         | Q9NZT1       | CALML5    | Calmodulin-like protein 5                             |
| 1.030           | 0.894        | 0.974        | 1.096        | 1.239        | 0.866        |              |              |              | 0.971         | 1.238         | 1.057         | Q7Z624       | CAMKMT    | Calmodulin-lysine N-methyltransferase                 |
| 1.025           | 1.042        | 1.022        | 1.010        | 0.940        | 1.007        | 1.003        | 1.022        | 1.001        | 0.962         | 0.960         | 0.996         | Q08AD1       | CAMSAP2   | Calmodulin-regulated spectrin-associated protein 2    |
| 2.036           | 0.984        | 1.752        | 0.975        | 0.572        | 1.182        | 0.495        | 0.767        | 0.789        | 0.283         | 0.793         | 0.248         | D6RB85       | CANX      | Calnexin (Fragment)                                   |
| 0.797           | 1.037        | 0.867        | 1.376        | 0.861        | 1.271        | 1.223        | 1.047        | 1.023        | 1.047         | 1.004         | 1.171         | K7ES78       | CAPNS1    | Calpain small subunit 1 (Fragment)                    |
| 0.955           | 0.989        | 0.972        | 1.014        | 0.994        | 0.964        | 0.950        | 1.010        | 0.958        | 0.961         | 0.992         | 0.955         | A0A0C4DGQ5   | CAPNS1    | Calpain small subunit 1                               |
| 0.990           | 0.991        | 1.008        | 0.993        | 0.966        | 0.997        | 0.974        | 0.959        | 0.992        | 0.989         | 0.981         | 1.004         | P07384       | CAPN1     | Calpain-1 catalytic subunit                           |
| 1.009           | 0.919        | 1.005        | 0.971        | 0.891        | 1.075        | 0.980        | 1.060        | 0.886        | 0.990         | 0.954         | 1.098         | O75808       | CAPN15    | Calpain-15                                            |
| 1.008           | 1.005        | 0.994        | 1.007        | 1.051        | 1.007        | 1.002        | 1.011        | 1.061        | 0.971         | 0.973         | 1.005         | P17655       | CAPN2     | Calpain-2 catalytic subunit                           |
| 0.947           | 0.960        | 1.021        | 0.969        | 0.889        | 1.002        | 1.061        | 0.965        | 0.953        | 1.024         | 0.975         | 0.999         | E7EV01       | CAPN5     | Calpain-5                                             |
| 1.049           | 1.010        | 1.003        | 1.004        | 0.995        | 1.014        | 1.009        | 1.046        | 0.985        | 1.060         | 1.037         | 1.067         | Q9Y6W3       | CAPN7     | Calpain-7                                             |
| 0.969           | 1.013        | 0.906        | 0.974        | 0.990        | 0.911        | 1.112        | 1.215        | 0.983        | 1.136         | 1.080         | 1.228         | D6RBR1       | CAST      | Calpastatin (Fragment)                                |
|                 |              |              | 0.952        | 0.889        | 0.892        |              |              |              | 1.082         | 1.050         | 0.986         | E7EVY3       | CAST      | Calpastatin                                           |
| 0.979           | 0.993        | 0.958        | 1.011        | 1.080        | 0.981        | 1.027        | 1.008        | 0.973        | 1.014         | 0.985         | 0.982         | B4DUT8       | CNN2      | Calponin                                              |
| 0.951           | 0.995        | 0.944        | 0.999        | 1.064        | 0.977        | 1.030        | 0.993        | 0.987        | 1.023         | 1.001         | 0.976         | Q15417       | CNN3      | Calponin-3                                            |
| 1.026           | 1.032        | 1.003        | 0.988        | 1.053        | 0.957        | 0.993        | 0.991        | 0.969        | 0.990         | 1.009         | 0.991         | P27797       | CALR      | Calreticulin                                          |
| 1.174           | 1.124        | 0.829        |              |              |              |              |              |              | 0.973         | 0.991         | 0.828         | O94985       | CLSTN1    | Calsyntenin-1                                         |
| 1.000           | 0.966        | 1.013        | 0.956        | 0.935        | 1.022        | 0.967        | 0.970        | 0.954        | 0.988         | 0.979         | 0.985         | P17612       | PRKACA    | cAMP-dependent protein kinase catalytic subunit alpha |
| 1.066           | 0.997        | 0.982        | 0.982        | 0.955        | 0.967        | 0.995        | 0.998        | 0.953        | 1.076         | 1.011         | 1.019         | P22694       | PRKACB    | cAMP-dependent protein kinase catalytic subunit beta  |
| 1.030           | 1.211        | 0.780        |              |              |              |              |              |              | 1.203         | 0.980         | 1.083         | P51817       | PRKX      | cAMP-dependent protein kinase catalytic subunit PRKX  |

| Abundance Ratio |              |              |              |              |              |              |              |              |               |               |               | Accession ID | Gene name | Protein Description                                                    |
|-----------------|--------------|--------------|--------------|--------------|--------------|--------------|--------------|--------------|---------------|---------------|---------------|--------------|-----------|------------------------------------------------------------------------|
| 1 d<br>M1/C1    | 1 d<br>M2/C2 | 1 d<br>M3/C3 | 4 d<br>M1/C1 | 4 d<br>M2/C2 | 4 d<br>M3/C3 | 7 d<br>M1/C1 | 7 d<br>M2/C2 | 7 d<br>M3/C3 | 10 d<br>M1/C1 | 10 d<br>M2/C2 | 10 d<br>M3/C3 |              |           |                                                                        |
| 0.947           | 0.997        | 1.006        | 0.908        | 0.990        | 0.994        |              |              |              |               |               |               | P61925       | PKIA      | cAMP-dependent protein kinase inhibitor alpha                          |
| 0.746           | 0.801        | 1.121        | 0.808        | 0.886        | 0.964        |              |              |              |               |               |               | Q9Y2B9       | PKIG      | cAMP-dependent protein kinase inhibitor gamma                          |
| 1.011           | 1.031        | 1.037        | 1.011        | 0.999        | 1.021        | 1.019        | 1.064        | 1.011        | 1.017         | 1.014         | 1.062         | P10644       | PRKAR1A   | cAMP-dependent protein kinase type I-alpha regulatory subunit          |
| 0.937           | 0.888        | 1.111        | 0.936        | 0.907        | 0.993        | 0.950        | 1.041        | 0.946        | 0.985         | 1.056         | 0.935         | P31321       | PRKAR1B   | cAMP-dependent protein kinase type I-beta regulatory subunit           |
| 1.006           | 0.990        | 1.004        | 1.004        | 0.980        | 1.023        | 1.001        | 1.003        | 0.989        | 0.991         | 1.003         | 0.998         | P13861       | PRKAR2A   | cAMP-dependent protein kinase type II-alpha regulatory subunit         |
| 1.013           | 0.979        | 0.965        | 0.953        | 0.975        | 1.041        | 1.061        | 0.963        | 0.957        | 1.059         | 0.958         | 1.036         | H3BMD8       | ARPP19    | cAMP-regulated phosphoprotein 19                                       |
| 1.002           | 0.985        | 0.994        | 1.027        | 0.961        | 1.020        | 0.986        | 1.104        | 1.025        | 0.989         | 1.003         | 0.985         | Q5TDF0       | NTPCR     | Cancer-related nucleoside-triphosphatase                               |
| 0.975           | 1.004        | 1.014        | 1.012        | 0.966        | 1.004        | 0.999        | 0.963        | 1.002        | 1.055         | 1.002         | 1.038         | Q9UDT6       | CLIP2     | CAP-Gly domain-containing linker protein 2                             |
| 0.956           | 1.011        | 0.967        | 0.997        | 0.997        | 1.000        | 1.021        | 0.993        | 0.991        | 1.012         | 0.997         | 1.019         | B1AK88       | CAPZB     | Capping protein (Actin filament) muscle Z-line, beta, isoform CRA_d    |
| 1.027           | 1.049        | 1.002        | 0.908        | 1.052        | 1.091        | 0.911        | 1.068        | 1.112        | 0.960         | 0.958         | 1.051         | Q6F5E8       | CARMIL2   | Capping protein, Arp2/3 and myosin-I linker protein 2                  |
| 0.968           | 1.013        | 0.963        | 1.015        | 0.986        | 1.010        | 1.020        | 1.018        | 1.023        | 0.989         | 1.037         | 0.965         | Q14444       | CAPRIN1   | Caprin-1                                                               |
|                 |              |              |              |              |              | 1.092        | 1.065        | 1.074        | 0.943         | 0.828         | 1.093         | Q6IMN6       | CAPRIN2   | Caprin-2                                                               |
| 0.977           | 0.986        | 1.025        | 0.985        | 0.951        | 1.011        | 0.999        | 1.034        | 1.047        | 1.012         | 0.996         | 1.039         | Q8N1G2       | CMTR1     | Cap-specific mRNA (nucleoside-2'-O-)-methyltransferase 1               |
| 0.935           | 1.010        | 0.981        | 0.934        | 0.994        | 0.985        | 1.025        | 1.119        | 1.074        | 1.009         | 1.023         | 1.085         | A0A0U1RRB3   | CMTR2     | Cap-specific mRNA (nucleoside-2'-O-)-methyltransferase 2               |
| 1.062           | 0.979        | 1.025        |              |              |              |              |              |              |               |               |               | A8MPS7       | YDJC      | Carbohydrate deacetylase                                               |
| 1.006           | 1.063        | 1.284        | 0.911        | 0.765        | 1.009        | 0.907        | 1.025        | 1.052        | 0.949         | 1.063         | 1.159         | Q9NPF2       | CHST11    | Carbohydrate sulfotransferase 11                                       |
|                 |              |              |              |              |              |              |              |              | 1.072         | 0.921         | 1.121         | Q9NRB3       | CHST12    | Carbohydrate sulfotransferase 12                                       |
| 1.018           | 0.953        | 1.035        | 0.958        | 0.985        | 1.068        |              |              |              |               |               |               | Q8NCH0       | CHST14    | Carbohydrate sulfotransferase 14                                       |
| 0.897           | 1.060        | 0.862        | 0.959        | 1.022        | 0.980        | 0.923        | 1.065        | 1.007        |               |               |               | Q7LGC8       | CHST3     | Carbohydrate sulfotransferase 3                                        |
| 1.001           | 0.870        | 1.014        | 0.979        | 0.910        | 1.030        | 1.043        | 0.921        | 1.046        | 1.085         | 1.011         | 1.228         | Q9NS84       | CHST7     | Carbohydrate sulfotransferase 7                                        |
| 1.057           | 1.027        | 1.027        | 1.033        | 0.999        | 1.043        | 1.041        | 0.991        | 0.999        | 1.094         | 1.005         | 1.012         | Q8N1Q1       | CA13      | Carbonic anhydrase 13                                                  |
| 0.956           | 0.997        | 1.005        | 0.947        | 0.911        | 0.936        | 0.944        | 0.991        | 0.985        | 0.950         | 0.892         | 1.044         | P00918       | CA2       | Carbonic anhydrase 2                                                   |
| 0.995           | 0.999        | 0.994        | 1.000        | 1.075        | 0.987        | 1.007        | 1.017        | 1.062        | 0.984         | 1.006         | 0.964         | P16152       | CBR1      | Carbonyl reductase [NADPH] 1                                           |
| 1.053           | 0.950        | 1.000        | 1.064        | 1.002        | 1.009        | 0.949        | 1.111        | 1.003        | 1.018         | 0.950         | 1.050         | O75828       | CBR3      | Carbonyl reductase [NADPH] 3                                           |
|                 |              |              | 1.004        | 0.915        | 0.915        | 1.011        | 1.055        | 1.025        | 0.907         | 0.461         | 1.009         | A0A024R6X1   | CES2      | Carboxylic ester hydrolase                                             |
|                 |              |              | 0.967        | 0.973        | 1.015        | 1.068        | 0.922        | 1.052        | 1.031         | 0.946         | 1.126         | O75052       | NOS1AP    | Carboxyl-terminal PDZ ligand of neuronal nitric oxide synthase protein |
| 1.001           | 0.977        | 0.975        | 0.982        | 0.968        | 0.992        | 0.948        | 0.965        | 0.982        | 1.030         | 0.986         | 0.995         | Q96DG6       | CMBL      | Carboxymethylenebutenolidase homolog                                   |
| 1.066           | 1.035        | 1.080        | 1.060        | 1.005        | 1.056        | 1.040        | 1.038        | 1.066        | 1.140         | 0.946         | 1.076         | O75976       | CPD       | Carboxypeptidase D                                                     |
| 0.994           | 1.037        | 0.946        | 1.081        | 1.088        | 1.005        | 1.090        | 1.039        | 1.004        | 1.128         | 1.065         | 0.990         | X6R8A1       | CTSA      | Carboxypeptidase                                                       |

| Abundance Ratio |              |              |              |              |              |              |              |              |               |               |               | Accession ID | Gene name | Protein Description                                                                    |
|-----------------|--------------|--------------|--------------|--------------|--------------|--------------|--------------|--------------|---------------|---------------|---------------|--------------|-----------|----------------------------------------------------------------------------------------|
| 1 d<br>M1/C1    | 1 d<br>M2/C2 | 1 d<br>M3/C3 | 4 d<br>M1/C1 | 4 d<br>M2/C2 | 4 d<br>M3/C3 | 7 d<br>M1/C1 | 7 d<br>M2/C2 | 7 d<br>M3/C3 | 10 d<br>M1/C1 | 10 d<br>M2/C2 | 10 d<br>M3/C3 |              |           |                                                                                        |
| 1.037           | 0.828        | 1.035        | 1.232        | 1.174        | 1.156        | 1.093        | 1.111        | 1.098        | 1.318         | 1.211         | 1.402         | Q9Y646       | CPQ       | Carboxypeptidase Q                                                                     |
| 0.999           | 1.001        | 1.041        | 0.983        | 0.873        | 1.091        | 0.983        | 1.113        | 1.118        | 1.025         | 1.044         | 1.115         | H7C1Z7       | CTDSP1    | Carboxy-terminal domain RNA polymerase II polypeptide A small phosphatase 1 (Fragment) |
|                 |              |              |              |              |              | 1.043        | 1.303        | 0.931        |               |               |               | P13688       | CEACAM1   | Carcinoembryonic antigen-related cell adhesion molecule 1                              |
| 1.011           | 1.000        | 1.021        | 0.975        | 0.966        | 1.006        | 1.009        | 1.016        | 0.983        | 1.037         | 0.977         | 1.012         | P43155       | CRAT      | Carnitine O-acetyltransferase                                                          |
| 1.004           | 1.005        | 1.019        | 1.010        | 0.963        | 0.983        | 0.987        | 1.043        | 0.997        | 0.971         | 1.011         | 0.961         | P50416       | CPT1A     | Carnitine O-palmitoyltransferase 1, liver isoform                                      |
| 0.983           | 0.996        | 1.027        | 1.017        | 1.027        | 1.034        | 1.002        | 0.946        | 1.004        | 1.056         | 0.979         | 1.061         | P23786       | CPT2      | Carnitine O-palmitoyltransferase 2, mitochondrial                                      |
| 1.094           | 1.077        | 1.076        | 0.979        | 0.919        | 1.021        | 0.972        | 1.083        | 1.103        | 0.985         | 1.059         | 1.075         | Q8N4J0       | CARNMT1   | Carnosine N-methyltransferase                                                          |
| 1.050           | 1.006        | 0.987        | 1.012        | 0.980        | 0.981        | 1.014        | 1.073        | 1.013        | 0.997         | 0.932         | 0.982         | O75718       | CRTAP     | Cartilage-associated protein                                                           |
| 1.031           | 1.024        | 1.014        | 1.013        | 0.997        | 0.986        | 1.053        | 1.088        | 1.045        | 1.023         | 0.944         | 1.052         | P48729       | CSNK1A1   | Casein kinase I isoform alpha                                                          |
| 1.011           | 0.985        | 0.989        | 1.033        | 0.978        | 1.041        | 0.993        | 0.971        | 1.012        | 1.016         | 0.962         | 1.053         | H7BYT1       | CSNK1D    | Casein kinase I isoform delta                                                          |
| 0.994           | 1.057        | 0.929        | 0.892        | 0.949        | 0.926        | 1.176        | 0.877        | 0.766        | 1.122         | 1.054         | 1.000         | P49674       | CSNK1E    | Casein kinase I isoform epsilon                                                        |
| 1.286           | 1.351        | 0.993        |              |              |              |              |              |              |               |               |               | P78368       | CSNK1G2   | Casein kinase I isoform gamma-2                                                        |
| 1.036           | 0.988        | 1.007        | 1.059        | 0.963        | 0.993        | 1.034        | 1.039        | 0.994        | 1.001         | 0.986         | 1.013         | P68400       | CSNK2A1   | Casein kinase II subunit alpha                                                         |
| 1.015           | 1.005        | 1.015        | 1.004        | 1.061        | 1.029        | 1.042        | 1.147        | 1.049        | 1.022         | 0.999         | 1.019         | P19784       | CSNK2A2   | Casein kinase II subunit alpha'                                                        |
| 1.069           | 1.063        | 1.016        | 1.036        | 1.280        | 0.918        | 1.044        | 0.960        | 1.036        | 1.014         | 1.048         | 0.974         | Q5SRQ6       | CSNK2B    | Casein kinase II subunit beta                                                          |
| 0.951           | 0.926        | 1.027        | 0.989        | 0.965        | 1.047        | 0.989        | 0.991        | 1.021        | 0.999         | 0.903         | 1.142         | Q8WXE0       | CASKIN2   | Caskin-2                                                                               |
| 1.056           | 0.966        | 1.062        | 0.868        | 0.842        | 0.965        | 0.868        | 0.773        | 0.969        |               |               |               | O15519       | CFLAR     | CASP8 and FADD-like apoptosis regulator                                                |
| 1.061           | 1.061        | 1.008        | 0.992        | 0.940        | 1.085        | 1.082        | 1.093        | 1.078        | 1.097         | 1.022         | 1.061         | Q9H8G2       | CAAP1     | Caspase activity and apoptosis inhibitor 1                                             |
| 1.180           | 0.906        | 1.135        |              |              |              |              |              |              |               |               |               | Q9BWT7       | CARD10    | Caspase recruitment domain-containing protein 10                                       |
| 1.012           | 1.031        | 1.036        | 1.043        | 1.083        | 1.016        | 1.064        | 1.031        | 1.055        | 0.954         | 0.949         | 1.046         | P29466       | CASP1     | Caspase-1                                                                              |
| 0.974           | 1.011        | 0.999        | 0.969        | 0.994        | 0.961        | 1.005        | 0.974        | 1.004        | 0.958         | 1.005         | 1.024         | P42575       | CASP2     | Caspase-2                                                                              |
| 0.882           | 0.952        | 1.042        | 0.963        | 1.011        | 1.029        | 0.995        | 0.896        | 1.033        | 0.967         | 0.977         | 1.074         | P42574       | CASP3     | Caspase-3                                                                              |
| 1.043           | 1.024        | 1.082        | 1.010        | 1.113        | 0.969        | 1.015        | 1.004        | 1.041        | 1.047         | 0.928         | 1.010         | P49662       | CASP4     | Caspase-4                                                                              |
| 0.992           | 0.965        | 0.959        | 0.971        | 0.953        | 0.999        | 0.968        | 1.030        | 0.983        | 0.961         | 0.994         | 0.984         | P55212       | CASP6     | Caspase-6                                                                              |
| 1.004           | 1.008        | 1.075        | 1.027        | 0.986        | 1.023        |              |              |              | 0.992         | 1.019         | 1.061         | P55211       | CASP9     | Caspase-9                                                                              |
| 1.056           | 0.996        | 1.020        | 1.020        | 0.991        | 0.999        | 1.029        | 1.021        | 0.989        | 1.019         | 1.034         | 0.979         | P04040       | CAT       | Catalase                                                                               |
| 0.910           | 1.015        | 1.010        | 1.043        | 1.001        | 1.064        | 1.050        | 1.109        | 1.042        | 0.981         | 0.995         | 1.031         | Q86VU5       | COMTD1    | Catechol O-methyltransferase domain-containing protein 1                               |
| 0.945           | 1.009        | 0.964        | 0.969        | 0.941        | 0.982        | 1.010        | 0.998        | 1.030        | 1.009         | 0.988         | 1.001         | P21964       | COMT      | Catechol O-methyltransferase                                                           |
| 0.991           | 0.983        | 1.007        | 0.994        | 0.954        | 1.011        | 1.031        | 1.022        | 1.005        | 0.976         | 0.975         | 1.067         | P35221       | CTNNA1    | Catenin alpha-1                                                                        |
| 0.935           | 0.995        | 1.025        | 0.933        | 1.109        | 1.160        |              |              |              | 0.838         | 1.068         | 0.938         | P26232       | CTNNA2    | Catenin alpha-2                                                                        |
| 1.032           | 0.994        | 1.022        | 1.034        | 0.915        | 1.016        | 1.056        | 1.056        | 0.995        | 1.094         | 0.928         | 1.101         | P35222       | CTNNB1    | Catenin beta-1                                                                         |

| Abundance Ratio |              |              |              |              |              |              |              |              |               |               |               | Accession ID | Gene name | Protein Description                                      |
|-----------------|--------------|--------------|--------------|--------------|--------------|--------------|--------------|--------------|---------------|---------------|---------------|--------------|-----------|----------------------------------------------------------|
| 1 d<br>M1/C1    | 1 d<br>M2/C2 | 1 d<br>M3/C3 | 4 d<br>M1/C1 | 4 d<br>M2/C2 | 4 d<br>M3/C3 | 7 d<br>M1/C1 | 7 d<br>M2/C2 | 7 d<br>M3/C3 | 10 d<br>M1/C1 | 10 d<br>M2/C2 | 10 d<br>M3/C3 |              |           |                                                          |
| 1.058           | 0.851        | 1.197        | 0.933        | 1.110        | 1.012        |              |              |              |               |               |               | Q9UQB3       | CTNND2    | Catenin delta-2                                          |
|                 |              |              | 1.078        | 1.061        | 1.127        | 0.987        | 1.397        | 0.828        | 1.235         | 1.107         | 1.562         | J3KNB4       | CAMP      | Cathelicidin antimicrobial peptide                       |
| 1.091           | 1.014        | 0.992        | 1.047        | 1.165        | 0.960        | 1.059        | 0.944        | 1.045        | 1.050         | 0.966         | 0.978         | P07858       | CTSB      | Cathepsin B                                              |
| 1.044           | 1.014        | 0.991        | 1.096        | 1.119        | 1.108        | 1.152        | 1.154        | 1.131        | 1.186         | 1.165         | 1.149         | P07339       | CTSD      | Cathepsin D                                              |
| 0.927           | 0.964        | 0.943        | 1.088        | 1.022        | 1.060        | 1.150        | 1.122        | 1.051        | 1.173         | 1.048         | 1.144         | P07711       | CTSL      | Cathepsin L1                                             |
| 1.047           | 1.000        | 0.935        | 1.035        | 1.001        | 0.973        | 1.107        | 0.966        | 0.931        | 1.181         | 1.097         | 1.047         | Q9UBR2       | CTSZ      | Cathepsin Z                                              |
| 1.049           | 1.014        | 1.037        | 1.082        | 1.234        | 1.031        | 1.102        | 0.906        | 1.095        | 1.029         | 1.011         | 1.023         | P20645       | M6PR      | Cation-dependent mannose-6-phosphate receptor            |
| 0.966           | 1.002        | 0.994        | 1.030        | 0.974        | 1.034        | 1.024        | 1.036        | 1.023        | 1.032         | 1.041         | 1.013         | P11717       | IGF2R     | Cation-independent mannose-6-phosphate receptor          |
| 1.001           | 1.005        | 1.017        | 1.016        | 0.876        | 0.978        | 1.108        | 1.068        | 0.964        | 1.107         | 0.946         | 1.001         | Q9NQ11       | ATP13A2   | Cation-transporting ATPase 13A2                          |
| 0.933           | 1.029        | 1.000        | 1.001        | 0.917        | 0.996        | 1.039        | 1.001        | 1.001        | 1.196         | 1.001         | 1.057         | Q03135       | CAV1      | Caveolin-1                                               |
| 0.877           | 1.009        | 1.008        | 0.951        | 0.875        | 1.060        | 1.071        | 1.014        | 1.067        | 1.141         | 1.022         | 1.115         | P51636       | CAV2      | Caveolin-2                                               |
|                 |              |              | 0.895        | 0.942        | 1.046        | 1.096        | 1.224        | 1.036        | 1.146         | 1.085         | 1.109         | Q96RK1       | CITED4    | Cbp/p300-interacting transactivator 4                    |
|                 |              |              |              |              |              | 1.238        | 0.851        | 1.123        | 1.003         | 1.126         | 1.083         | O43310       | CTIF      | CBP80/20-dependent translation initiation factor         |
| 0.933           | 1.058        | 1.160        | 1.141        | 1.376        | 1.200        | 1.079        | 1.123        | 1.086        | 1.002         | 1.082         | 1.009         | P78556       | CCL20     | C-C motif chemokine 20                                   |
| 1.014           | 0.994        | 1.031        | 1.018        | 0.982        | 1.019        | 1.018        | 0.998        | 1.004        | 1.036         | 0.980         | 1.027         | Q96Q11       | TRNT1     | CCA tRNA nucleotidyltransferase 1, mitochondrial         |
| 1.112           | 1.095        | 1.103        | 1.018        | 1.041        | 1.022        | 0.979        | 0.967        | 0.981        | 0.976         | 1.082         | 1.037         | P17676       | CEBPB     | CCAAT/enhancer-binding protein beta                      |
| 1.063           | 1.029        | 1.132        | 0.943        | 1.646        | 1.127        |              |              |              |               |               |               | P49716       | CEBPD     | CCAAT/enhancer-binding protein delta                     |
| 1.026           | 1.003        | 1.022        | 1.007        | 0.994        | 1.000        | 1.008        | 1.057        | 1.041        | 1.018         | 1.036         | 1.024         | Q03701       | CEBPZ     | CCAAT/enhancer-binding protein zeta                      |
| 0.987           | 0.996        | 1.016        | 0.988        | 0.957        | 1.020        | 0.982        | 1.051        | 1.024        | 0.982         | 0.996         | 1.006         | A5YKK6       | CNOT1     | CCR4-NOT transcription complex subunit 1                 |
| 1.036           | 0.994        | 1.019        | 0.969        | 0.917        | 1.006        | 1.000        | 1.063        | 1.016        | 0.951         | 0.956         | 1.064         | Q9UKZ1       | CNOT11    | CCR4-NOT transcription complex subunit 11                |
| 0.963           | 0.992        | 1.008        | 0.962        | 1.034        | 0.986        | 0.960        | 0.859        | 0.971        | 0.987         | 1.044         | 1.065         | Q9NZN8       | CNOT2     | CCR4-NOT transcription complex subunit 2                 |
| 1.025           | 1.013        | 0.997        | 0.997        | 0.953        | 1.016        | 0.990        | 0.963        | 1.037        | 1.052         | 1.032         | 1.028         | O75175       | CNOT3     | CCR4-NOT transcription complex subunit 3                 |
| 0.949           | 1.256        | 1.012        |              |              |              |              |              |              | 0.800         | 1.237         | 0.909         | Q9ULM6       | CNOT6     | CCR4-NOT transcription complex subunit 6                 |
| 1.080           | 1.009        | 1.023        | 0.982        | 1.076        | 1.026        | 1.112        | 1.181        | 1.041        | 0.892         | 0.910         | 1.069         | H0Y9Z5       | CNOT6L    | CCR4-NOT transcription complex subunit 6-like (Fragment) |
| 1.067           | 1.036        | 0.977        | 0.945        | 0.880        | 0.980        | 0.974        | 1.126        | 1.033        | 0.987         | 0.955         | 0.959         | Q9UIV1       | CNOT7     | CCR4-NOT transcription complex subunit 7                 |
| 0.972           | 1.001        | 0.967        | 0.981        | 0.899        | 1.006        | 1.002        | 1.076        | 0.993        | 1.020         | 1.043         | 1.024         | Q9UFF9       | CNOT8     | CCR4-NOT transcription complex subunit 8                 |
| 1.029           | 1.005        | 1.004        | 0.990        | 0.934        | 1.027        | 1.038        | 1.099        | 1.033        | 0.987         | 0.998         | 0.988         | Q92600       | CNOT9     | CCR4-NOT transcription complex subunit 9                 |
| 1.008           | 1.018        | 1.004        | 1.050        | 1.026        | 1.035        | 1.044        | 1.096        | 1.053        | 0.995         | 0.960         | 1.074         | Q6YHK3       | CD109     | CD109 antigen                                            |
| 1.162           | 0.957        | 1.009        | 1.025        | 1.224        | 1.151        | 1.293        | 0.789        | 1.296        | 1.205         | 1.076         | 1.168         | P48509       | CD151     | CD151 antigen                                            |
| 0.989           | 1.021        | 0.986        | 1.039        | 0.942        | 1.004        | 1.037        | 0.954        | 0.992        | 1.074         | 1.028         | 1.060         | Q13740       | ALCAM     | CD166 antigen                                            |
| 0.998           | 0.994        | 1.028        | 0.986        | 0.962        | 1.021        | 1.008        | 1.003        | 1.006        | 1.019         | 1.031         | 1.021         | O95400       | CD2BP2    | CD2 antigen cytoplasmic tail-binding protein 2           |
| 0.995           | 0.953        | 0.962        | 1.062        | 0.951        | 1.098        |              |              |              | 1.028         | 1.034         | 1.149         | Q5ZPR3       | CD276     | CD276 antigen                                            |
| 1.003           | 1.000        | 0.978        | 1.000        | 0.984        | 0.993        | 0.993        | 1.009        | 0.994        | 1.003         | 1.000         | 1.018         | Q9Y5K6       | CD2AP     | CD2-associated protein                                   |

| Abundance Ratio |              |              |              |              |              |              |              |              |               |               |               | Accession ID | Gene name  | Protein Description                                                               |
|-----------------|--------------|--------------|--------------|--------------|--------------|--------------|--------------|--------------|---------------|---------------|---------------|--------------|------------|-----------------------------------------------------------------------------------|
| 1 d<br>M1/C1    | 1 d<br>M2/C2 | 1 d<br>M3/C3 | 4 d<br>M1/C1 | 4 d<br>M2/C2 | 4 d<br>M3/C3 | 7 d<br>M1/C1 | 7 d<br>M2/C2 | 7 d<br>M3/C3 | 10 d<br>M1/C1 | 10 d<br>M2/C2 | 10 d<br>M3/C3 |              |            |                                                                                   |
|                 |              |              |              |              |              |              |              |              | 0.874         | 0.993         | 1.153         | Q9NPF0       | CD320      | CD320 antigen                                                                     |
| 0.903           | 1.023        | 0.988        | 1.045        | 0.974        | 1.024        | 1.133        | 1.063        | 1.004        | 1.092         | 0.963         | 1.144         | P16070       | CD44       | CD44 antigen                                                                      |
| 0.869           | 0.984        | 0.863        | 1.045        | 0.987        | 1.017        | 1.190        | 0.986        | 1.045        | 1.126         | 0.995         | 1.063         | E9PR17       | CD59       | CD59 glycoprotein                                                                 |
| 0.815           | 1.049        | 0.926        | 1.119        | 0.979        | 1.198        | 1.288        | 1.145        | 1.057        | 1.306         | 1.267         | 1.130         | P08962       | CD63       | CD63 antigen                                                                      |
| 0.973           | 1.006        | 1.024        | 0.960        | 0.905        | 1.024        | 0.969        | 1.104        | 0.986        | 0.984         | 0.965         | 1.040         | P32970       | CD70       | CD70 antigen                                                                      |
|                 |              |              |              |              |              | 1.082        | 1.140        | 1.083        |               |               |               | P27701       | CD82       | CD82 antigen                                                                      |
| 0.923           | 0.989        | 1.018        | 1.041        | 1.013        | 1.067        | 1.097        | 0.974        | 0.919        | 1.139         | 0.994         | 1.117         | P48960       | CD97       | CD97 antigen                                                                      |
| 0.877           | 0.955        | 1.025        | 1.203        | 0.703        | 0.955        | 1.063        | 0.951        | 1.022        | 1.126         | 1.163         | 1.021         | H7C2F2       | CD99       | CD99 antigen (Fragment)                                                           |
| 1.012           | 1.037        | 1.118        | 0.968        | 0.935        | 1.190        | 1.131        | 0.988        | 0.988        | 1.207         | 1.101         | 1.168         | P14209       | CD99       | CD99 antigen                                                                      |
| 1.073           | 0.967        | 1.024        | 1.001        | 0.968        | 0.983        | 1.005        | 1.022        | 0.991        | 1.025         | 1.006         | 1.024         | Q00587       | CDC42EP1   | Cdc42 effector protein 1                                                          |
| 0.962           | 0.931        | 1.189        | 0.909        | 0.995        | 0.956        | 0.963        | 1.234        | 0.952        | 1.090         | 0.959         | 1.295         | O14613       | CDC42EP2   | Cdc42 effector protein 2                                                          |
| 0.961           | 0.973        | 1.010        | 1.033        | 0.945        | 0.984        | 0.990        | 0.968        | 0.999        | 1.117         | 0.960         | 1.134         | Q9H3Q1       | CDC42EP4   | Cdc42 effector protein 4                                                          |
|                 |              |              | 0.990        | 0.790        | 0.913        | 1.209        | 1.077        | 0.978        |               |               |               | Q9NRR3       | CDC42SE2   | CDC42 small effector protein 2                                                    |
|                 |              |              | 0.985        | 1.161        | 0.999        |              |              |              |               |               |               | Q15642       | TRIP10     | Cdc42-interacting protein 4                                                       |
| 1.043           | 1.090        | 1.072        | 1.148        | 1.258        | 1.067        | 1.217        | 1.077        | 1.156        | 1.230         | 1.137         | 1.174         | Q9NZ45       | CISD1      | CDGSH iron-sulfur domain-containing protein 1                                     |
| 1.019           | 1.031        | 1.033        | 1.074        | 1.091        | 1.053        | 1.185        | 1.140        | 1.112        | 1.124         | 0.937         | 1.087         | Q8N5K1       | CISD2      | CDGSH iron-sulfur domain-containing protein 2                                     |
| 1.013           | 1.004        | 0.964        | 1.074        | 1.044        | 1.059        | 1.068        | 1.070        | 1.067        | 1.257         | 1.119         | 1.191         | P0C7P0       | CISD3      | CDGSH iron-sulfur domain-containing protein 3,<br>mitochondrial                   |
| 1.132           | 0.997        | 1.110        | 1.045        | 1.053        | 0.950        |              |              |              | 1.117         | 1.104         | 1.120         | Q86Y37       | CACUL1     | CDK2-associated and cullin domain-containing protein 1                            |
|                 |              |              |              |              |              |              |              |              | 1.043         | 1.080         | 1.068         | Q98TV7       | CABLES2    | CDK5 and ABL1 enzyme substrate 2                                                  |
| 0.969           | 0.912        | 1.060        | 1.039        | 1.039        | 0.976        | 1.036        | 1.021        | 1.011        | 0.993         | 1.035         | 1.040         | Q96SN8       | CDK5RAP2   | CDK5 regulatory subunit-associated protein 2                                      |
| 1.014           | 0.946        | 1.027        | 0.957        | 0.914        | 1.080        | 1.044        | 1.033        | 1.004        | 1.043         | 1.008         | 1.083         | P51948       | MNAT1      | CDK-activating kinase assembly factor MAT1                                        |
| 0.968           | 1.000        | 1.008        | 0.975        | 0.978        | 0.989        | 0.994        | 0.909        | 0.982        | 1.054         | 1.012         | 1.066         | Q9NXV6       | CDKN2AIP   | CDKN2A-interacting protein                                                        |
| 1.018           | 0.944        | 0.996        | 0.960        | 0.957        | 1.066        | 0.935        | 0.881        | 0.995        | 1.005         | 1.119         | 1.086         | Q96HQ2       | CDKN2AIPNL | CDKN2AIP N-terminal-like protein                                                  |
|                 |              |              |              |              |              | 1.103        | 1.363        | 1.422        | 0.976         | 0.915         | 1.072         | B4E1Z4       | 1 SV       | cDNA FLJ55673, highly similar to Complement factor B (EC 3.4.21.47)               |
| 1.119           | 1.098        | 1.000        | 1.042        | 0.976        | 0.999        | 1.061        | 1.232        | 0.987        | 1.051         | 1.046         | 1.078         | Q32NB8       | PGS1       | CDP-diacylglycerol--glycerol-3-phosphate 3-phosphatidyltransferase, mitochondrial |
| 0.823           | 0.978        | 0.969        | 0.874        | 0.877        | 1.112        | 0.982        | 0.957        | 1.087        | 1.232         | 0.977         | 1.128         | O14735       | CDIPT      | CDP-diacylglycerol--inositol 3-phosphatidyltransferase                            |
| 0.994           | 0.925        | 1.119        |              |              |              |              |              |              |               |               |               | Q8NFZ8       | CADM4      | Cell adhesion molecule 4                                                          |
| 0.980           | 1.039        | 0.993        | 0.960        | 0.990        | 0.995        | 1.008        | 1.107        | 0.994        | 1.010         | 0.997         | 1.015         | E5RFJ3       | CCAR2      | Cell cycle and apoptosis regulator protein 2 (Fragment)                           |
| 1.009           | 1.005        | 1.004        | 0.974        | 0.980        | 0.991        | 0.993        | 0.994        | 1.007        | 0.988         | 0.989         | 1.009         | Q8N163       | CCAR2      | Cell cycle and apoptosis regulator protein 2                                      |
| 1.001           | 0.939        | 1.194        | 1.009        | 0.949        | 1.009        | 0.963        | 1.024        | 1.185        | 0.980         | 0.995         | 1.012         | Q99638       | RAD9A      | Cell cycle checkpoint control protein RAD9A                                       |



| Abundance Ratio |              |              |              |              |              |              |              |              |               |               |               | Accession ID | Gene name | Protein Description                                     |
|-----------------|--------------|--------------|--------------|--------------|--------------|--------------|--------------|--------------|---------------|---------------|---------------|--------------|-----------|---------------------------------------------------------|
| 1 d<br>M1/C1    | 1 d<br>M2/C2 | 1 d<br>M3/C3 | 4 d<br>M1/C1 | 4 d<br>M2/C2 | 4 d<br>M3/C3 | 7 d<br>M1/C1 | 7 d<br>M2/C2 | 7 d<br>M3/C3 | 10 d<br>M1/C1 | 10 d<br>M2/C2 | 10 d<br>M3/C3 |              |           |                                                         |
| 1.053           | 0.969        | 1.055        | 1.222        | 0.994        | 1.049        | 1.028        | 0.965        | 0.962        | 0.973         | 0.985         | 1.097         | O60671       | RAD1      | Cell cycle checkpoint protein RAD1                      |
| 1.029           | 1.048        | 0.964        | 0.764        | 0.961        | 0.970        | 1.019        | 1.180        | 1.066        | 0.951         | 0.940         | 1.002         | A0A0G2JPT5   | RAD17     | Cell cycle checkpoint protein RAD17                     |
| 1.009           | 1.013        | 1.051        | 1.009        | 0.965        | 1.053        | 1.034        | 1.099        | 1.059        | 1.063         | 1.027         | 1.075         | Q9NV96       | TMEM30A   | Cell cycle control protein 50A                          |
| 1.031           | 1.013        | 1.075        | 1.025        | 0.963        | 1.051        | 0.992        | 1.022        | 1.043        | 1.053         | 1.002         | 1.115         | Q9NQS1       | AVEN      | Cell death regulator Aven                               |
| 1.083           | 0.979        | 1.007        | 1.027        | 1.156        | 0.999        | 1.052        | 0.944        | 1.004        | 1.044         | 1.048         | 0.961         | P60953       | CDC42     | Cell division control protein 42 homolog                |
| 1.005           | 0.987        | 1.008        | 1.003        | 1.011        | 0.998        | 1.013        | 1.038        | 1.025        | 0.987         | 1.009         | 1.021         | Q99459       | CDC5L     | Cell division cycle 5-like protein                      |
| 0.806           | 1.141        | 0.932        |              |              |              |              |              |              |               |               |               | O00311       | CDC7      | Cell division cycle 7-related protein kinase            |
| 1.004           | 0.995        | 1.006        | 0.982        | 0.994        | 0.994        | 0.985        | 0.974        | 0.965        | 1.033         | 1.037         | 1.060         | Q8IX12       | CCAR1     | Cell division cycle and apoptosis regulator protein 1   |
| 1.057           | 1.022        | 0.976        | 1.036        | 1.034        | 1.118        | 1.058        | 1.115        | 1.068        | 0.945         | 1.008         | 1.032         | O75794       | CDC123    | Cell division cycle protein 123 homolog                 |
| 1.036           | 0.971        | 1.011        | 1.002        | 0.967        | 1.014        | 1.014        | 0.969        | 1.005        | 1.160         | 0.913         | 1.067         | Q13042       | CDC16     | Cell division cycle protein 16 homolog                  |
| 0.937           | 0.956        | 0.880        | 0.921        | 0.896        | 1.026        | 0.998        | 1.126        | 0.934        | 1.036         | 0.956         | 0.980         | Q86Y33       | CDC20B    | Cell division cycle protein 20 homolog B                |
| 1.002           | 0.994        | 1.080        | 1.235        | 1.185        | 0.899        | 0.924        | 1.242        | 1.077        | 1.058         | 0.661         | 1.528         | Q12834       | CDC20     | Cell division cycle protein 20 homolog                  |
| 1.048           | 1.012        | 1.013        | 1.017        | 0.967        | 1.005        | 0.983        | 1.107        | 0.992        | 0.983         | 0.988         | 0.966         | Q9UJX2       | CDC23     | Cell division cycle protein 23 homolog                  |
| 0.898           | 0.959        | 1.038        |              |              |              |              |              |              |               |               |               | Q69YH5       | CDCA2     | Cell division cycle-associated protein 2                |
| 0.951           | 1.040        | 1.057        | 1.090        | 1.107        | 0.988        | 1.290        | 0.958        | 0.943        |               |               |               | Q99618       | CDCA3     | Cell division cycle-associated protein 3                |
| 1.270           | 0.913        | 1.073        |              |              |              |              |              |              |               |               |               | Q99675       | CGRRF1    | Cell growth regulator with RING finger domain protein 1 |
| 0.987           | 0.978        | 1.018        | 0.970        | 0.972        | 1.027        | 0.962        | 0.988        | 0.957        | 1.017         | 0.993         | 1.051         | Q9NX58       | LYAR      | Cell growth-regulating nucleolar protein                |
| 0.962           | 0.979        | 0.990        | 1.000        | 0.952        | 0.982        | 1.004        | 0.935        | 1.006        | 1.021         | 1.002         | 1.038         | P43121       | MCAM      | Cell surface glycoprotein MUC18                         |
| 1.035           | 1.075        | 1.177        | 1.156        | 1.809        | 1.045        | 1.148        | 0.555        | 1.072        | 1.043         | 1.052         | 1.045         | P62633       | CNBP      | Cellular nucleic acid-binding protein                   |
| 0.907           | 0.961        | 1.040        | 0.944        | 0.993        | 1.000        | 0.913        | 0.840        | 0.987        | 0.994         | 1.006         | 1.043         | P41208       | CETN2     | Centrin-2                                               |
| 0.957           | 1.002        | 0.971        | 0.994        | 0.972        | 0.978        | 1.004        | 0.993        | 1.012        | 1.015         | 0.966         | 1.028         | E5RJF8       | CETN3     | Centrin-3                                               |
| 1.033           | 0.966        | 1.094        | 0.837        | 0.742        | 1.186        | 0.887        | 1.357        | 1.228        |               |               |               | O43303       | CCP110    | Centriolar coiled-coil protein of 110 kDa               |
| 0.866           | 0.857        | 0.691        |              |              |              |              |              |              |               |               |               | Q7Z7A1       | CNTRL     | Centriolin                                              |
| 1.062           | 0.992        | 1.019        | 1.094        | 0.968        | 1.004        | 1.013        | 1.066        | 1.042        | 0.971         | 1.008         | 1.007         | Q03188       | CENPC     | Centromere protein C                                    |
| 0.941           | 1.002        | 1.049        | 0.956        | 0.940        | 1.240        | 1.125        | 1.175        | 1.171        | 1.017         | 1.009         | 0.980         | P49454       | CENPF     | Centromere protein F                                    |
| 0.979           | 1.028        | 0.995        | 0.915        | 0.898        | 1.025        | 0.968        | 1.210        | 0.981        | 0.997         | 0.825         | 0.994         | Q9H3R5       | CENPH     | Centromere protein H                                    |
| 1.127           | 1.006        | 1.160        | 0.992        | 1.015        | 1.189        | 1.001        | 1.102        | 0.964        | 0.962         | 0.731         | 1.659         | Q92674       | CENPI     | Centromere protein I                                    |
| 1.021           | 0.909        | 0.960        | 0.979        | 1.027        | 0.930        |              |              |              |               |               |               | Q9B516       | CENPK     | Centromere protein K                                    |
| 0.901           | 1.060        | 0.976        | 0.853        | 0.909        | 1.270        | 0.965        | 0.966        | 1.071        | 0.781         | 0.995         | 0.896         | Q8N0S6       | CENPL     | Centromere protein L                                    |
| 1.080           | 1.040        | 1.285        |              |              |              | 0.916        | 1.210        | 1.073        | 1.023         | 0.962         | 1.122         | Q9NSP4       | CENPM     | Centromere protein M                                    |
| 1.121           | 1.056        | 1.243        |              |              |              |              |              |              |               |               |               | Q9BU64       | CENPO     | Centromere protein O                                    |
| 0.982           | 0.934        | 1.118        | 1.126        | 0.921        | 1.205        | 1.225        | 0.921        | 1.116        |               |               |               | Q7L2Z9       | CENPQ     | Centromere protein Q                                    |
|                 |              |              |              |              |              | 1.095        | 0.758        | 0.957        | 1.162         | 0.920         | 1.218         | Q8N2Z9       | CENPS     | Centromere protein S                                    |

| Abundance Ratio |              |              |              |              |              |              |              |              |               |               |               | Accession ID | Gene name | Protein Description                         |
|-----------------|--------------|--------------|--------------|--------------|--------------|--------------|--------------|--------------|---------------|---------------|---------------|--------------|-----------|---------------------------------------------|
| 1 d<br>M1/C1    | 1 d<br>M2/C2 | 1 d<br>M3/C3 | 4 d<br>M1/C1 | 4 d<br>M2/C2 | 4 d<br>M3/C3 | 7 d<br>M1/C1 | 7 d<br>M2/C2 | 7 d<br>M3/C3 | 10 d<br>M1/C1 | 10 d<br>M2/C2 | 10 d<br>M3/C3 |              |           |                                             |
| 1.028           | 1.043        | 1.124        | 1.078        | 1.080        | 0.909        | 0.911        | 1.076        | 0.917        | 1.157         | 0.847         | 1.137         | Q96BT3       | CENPT     | Centromere protein T                        |
|                 |              |              | 0.954        | 1.085        | 0.877        |              |              |              | 1.233         | 1.052         | 1.171         | Q71F23       | CENPU     | Centromere protein U                        |
| 1.046           | 0.927        | 0.970        | 0.953        | 1.020        | 1.001        | 0.925        | 0.919        | 1.022        | 1.054         | 1.012         | 1.025         | Q7Z7K6       | CENPV     | Centromere protein V                        |
|                 |              |              |              |              |              |              |              |              | 0.758         | 0.803         | 1.018         | A8MT69       | CENPX     | Centromere protein X                        |
| 1.044           | 1.005        | 1.021        | 1.009        | 0.953        | 1.039        | 1.021        | 1.037        | 1.023        | 1.013         | 0.975         | 1.014         | O43264       | ZW10      | Centromere/kinetochore protein zw10 homolog |
| 0.909           | 0.850        | 0.903        |              |              |              |              |              |              |               |               |               | Q02224       | CENPE     | Centromere-associated protein E             |
|                 |              |              |              |              |              | 0.906        | 1.133        | 1.071        | 0.884         | 0.778         | 1.454         | O60308       | CEP104    | Centrosomal protein of 104 kDa              |
| 1.712           | 0.835        | 1.532        |              |              |              | 1.218        | 0.867        | 1.072        | 0.963         | 1.244         | 1.284         | Q8N8E3       | CEP112    | Centrosomal protein of 112 kDa              |
| 2.161           | 0.935        | 1.019        | 0.993        | 0.826        | 1.006        | 0.993        | 1.180        | 1.071        |               |               |               | Q8N960       | CEP120    | Centrosomal protein of 120 kDa              |
|                 |              |              |              |              |              | 0.999        | 0.920        | 0.836        |               |               |               | Q6ZU80       | CEP128    | Centrosomal protein of 128 kDa              |
| 0.952           | 0.981        | 1.018        | 1.023        | 0.993        | 1.105        | 0.961        | 1.008        | 1.006        | 1.078         | 1.053         | 1.124         | Q9UPN4       | CEP131    | Centrosomal protein of 131 kDa              |
| 1.085           | 0.955        | 1.110        | 0.820        | 1.063        | 0.932        | 0.949        | 0.986        | 0.981        | 1.016         | 0.792         | 1.140         | Q66GS9       | CEP135    | Centrosomal protein of 135 kDa              |
| 0.936           | 0.921        | 1.121        |              |              |              |              |              |              |               |               |               | Q5TB80       | CEP162    | Centrosomal protein of 162 kDa              |
|                 |              |              |              |              |              |              |              |              | 0.935         | 0.767         | 0.910         | E7EWM2       | CEP170    | Centrosomal protein of 170 kDa              |
| 0.997           | 0.981        | 1.022        | 0.978        | 0.955        | 1.004        | 0.965        | 0.920        | 0.980        | 1.029         | 1.018         | 1.078         | Q5SW79       | CEP170    | Centrosomal protein of 170 kDa              |
| 1.022           | 1.008        | 0.973        | 0.996        | 0.947        | 0.974        | 0.976        | 1.088        | 0.989        | 1.088         | 0.978         | 1.202         | J3KQR7       | CEP170B   | Centrosomal protein of 170 kDa protein B    |
| 0.870           | 0.943        | 0.928        | 1.024        | 1.090        | 1.165        | 1.091        | 1.061        | 0.917        | 1.235         | 0.981         | 1.266         | J3KNF5       | CEP290    | Centrosomal protein of 290 kDa              |
| 0.968           | 0.988        | 1.022        | 0.999        | 0.992        | 0.986        | 0.976        | 0.729        | 0.905        | 1.072         | 1.022         | 1.178         | Q9BYV8       | CEP41     | Centrosomal protein of 41 kDa               |
| 1.199           | 1.021        | 0.935        | 1.021        | 0.892        | 1.082        | 0.954        | 0.955        | 1.138        | 0.973         | 0.920         | 1.041         | Q9C0F1       | CEP44     | Centrosomal protein of 44 kDa               |
| 0.960           | 1.024        | 1.041        | 0.932        | 0.938        | 0.984        | 1.026        | 0.878        | 1.034        | 1.149         | 0.963         | 1.300         | Q53EZ4       | CEP55     | Centrosomal protein of 55 kDa               |
| 0.958           | 0.871        | 1.053        | 0.908        | 0.950        | 1.067        | 1.085        | 0.884        | 1.106        | 1.075         | 1.060         | 1.461         | Q86XR8       | CEP57     | Centrosomal protein of 57 kDa               |
| 0.920           | 0.904        | 1.068        |              |              |              |              |              |              |               |               |               | Q76N32       | CEP68     | Centrosomal protein of 68 kDa               |
| 1.037           | 1.039        | 1.031        | 0.995        | 0.991        | 1.026        | 1.151        | 1.096        | 0.926        | 1.016         | 1.126         | 0.951         | Q9P209       | CEP72     | Centrosomal protein of 72 kDa               |
| 1.331           | 1.031        | 1.258        |              |              |              | 0.949        | 0.864        | 0.885        |               |               |               | Q8TAP6       | CEP76     | Centrosomal protein of 76 kDa               |
| 0.936           | 1.099        | 1.034        |              |              |              | 1.004        | 0.879        | 1.210        | 1.064         | 0.961         | 1.157         | J3KNW7       | CEP83     | Centrosomal protein of 83 kDa               |
| 1.108           | 0.910        | 0.903        | 0.969        | 0.792        | 1.026        | 1.004        | 1.197        | 1.025        | 1.018         | 0.979         | 1.090         | Q6P2H3       | CEP85     | Centrosomal protein of 85 kDa               |
| 0.909           | 0.898        | 0.817        | 1.142        | 0.832        | 0.864        | 1.273        | 0.894        | 0.912        | 1.539         | 1.363         | 0.998         | Q96ST8       | CEP89     | Centrosomal protein of 89 kDa               |
| 0.883           | 1.012        | 0.964        |              |              |              | 0.965        | 1.020        | 0.963        |               |               |               | Q5VT06       | CEP350    | Centrosome-associated protein 350           |
| 1.070           | 0.963        | 0.978        | 0.974        | 1.008        | 0.949        | 0.950        | 0.907        | 1.064        | 1.090         | 1.011         | 1.149         | Q9BV73       | CEP250    | Centrosome-associated protein CEP250        |
| 1.041           | 1.023        | 1.017        | 1.094        | 1.022        | 1.092        | 1.078        | 1.213        | 1.055        | 1.003         | 1.076         | 1.051         | Q16739       | UGCG      | Ceramide glucosyltransferase                |
| 0.968           | 1.000        | 0.991        | 1.041        | 0.937        | 0.999        | 0.982        | 0.966        | 0.999        | 1.088         | 1.083         | 1.078         | Q96G23       | CERS2     | Ceramide synthase 2                         |
|                 |              |              |              |              |              | 0.812        | 0.975        | 0.932        |               |               |               | Q9HA82       | CERS4     | Ceramide synthase 4                         |
| 1.091           | 1.072        | 1.101        | 0.997        | 0.848        | 1.049        | 1.070        | 1.108        | 1.040        | 1.011         | 1.074         | 1.087         | Q8N5B7       | CERS5     | Ceramide synthase 5                         |
| 1.037           | 0.971        | 0.978        | 1.026        | 0.989        | 1.058        | 1.130        | 1.056        | 0.958        | 1.015         | 1.001         | 0.950         | Q5TA50       | CPTP      | Ceramide-1-phosphate transfer protein       |

| Abundance Ratio |              |              |              |              |              |              |              |              |               |               |               | Accession ID | Gene name | Protein Description                                   |
|-----------------|--------------|--------------|--------------|--------------|--------------|--------------|--------------|--------------|---------------|---------------|---------------|--------------|-----------|-------------------------------------------------------|
| 1 d<br>M1/C1    | 1 d<br>M2/C2 | 1 d<br>M3/C3 | 4 d<br>M1/C1 | 4 d<br>M2/C2 | 4 d<br>M3/C3 | 7 d<br>M1/C1 | 7 d<br>M2/C2 | 7 d<br>M3/C3 | 10 d<br>M1/C1 | 10 d<br>M2/C2 | 10 d<br>M3/C3 |              |           |                                                       |
| 0.961           | 0.991        | 1.010        | 0.956        | 1.029        | 1.086        | 0.961        | 1.021        | 1.013        | 0.754         | 0.855         | 1.052         | Q01850       | CDR2      | Cerebellar degeneration-related protein 2             |
| 0.971           | 1.021        | 0.835        | 0.952        | 0.961        | 0.998        | 1.047        | 1.129        | 0.948        | 1.023         | 0.987         | 1.183         | Q86X02       | CDR2L     | Cerebellar degeneration-related protein 2-like        |
| 0.973           | 1.096        | 1.063        | 1.002        | 0.990        | 0.944        | 0.982        | 1.174        | 0.960        | 1.105         | 0.980         | 1.044         | Q9BSQ5       | CCM2      | Cerebral cavernous malformations 2 protein            |
| 1.070           | 0.966        | 0.982        | 1.026        | 0.904        | 1.043        | 1.049        | 1.047        | 1.035        | 1.149         | 1.069         | 1.137         | A0A024R644   | CLN5      | Ceroid-lipofuscinosis neuronal protein 5              |
| 0.972           | 1.020        | 1.100        | 0.990        | 0.838        | 0.837        | 0.961        | 1.132        | 1.001        | 0.859         | 1.133         | 0.838         | Q9NWW5       | CLN6      | Ceroid-lipofuscinosis neuronal protein 6              |
|                 |              |              | 1.096        | 0.862        | 0.852        |              |              |              |               |               |               | P00450       | CP        | Ceruloplasmin                                         |
| 1.021           | 0.983        | 1.026        | 0.960        | 0.876        | 1.026        | 0.999        | 0.908        | 1.014        | 1.010         | 0.873         | 1.085         | Q9UFW8       | CGGBP1    | CGG triplet repeat-binding protein 1                  |
| 0.977           | 0.989        | 0.987        | 0.988        | 0.996        | 1.023        | 0.998        | 0.942        | 0.962        | 1.027         | 1.007         | 1.021         | Q9HD42       | CHMP1A    | Charged multivesicular body protein 1a                |
| 1.014           | 1.020        | 1.018        | 0.996        | 1.004        | 1.066        | 0.982        | 1.020        | 1.008        | 0.990         | 1.082         | 0.973         | Q7LBR1       | CHMP1B    | Charged multivesicular body protein 1b                |
| 0.879           | 1.023        | 0.988        | 0.986        | 0.984        | 1.077        | 1.012        | 0.974        | 0.988        | 1.017         | 1.071         | 0.991         | M0R1T5       | CHMP2A    | Charged multivesicular body protein 2a (Fragment)     |
| 0.911           | 0.999        | 0.951        | 0.986        | 1.032        | 1.063        | 1.003        | 0.922        | 0.980        | 1.009         | 1.002         | 1.020         | Q9UQN3       | CHMP2B    | Charged multivesicular body protein 2b                |
| 1.040           | 1.006        | 0.999        | 0.967        | 0.983        | 1.011        | 0.993        | 0.918        | 0.970        | 1.032         | 0.957         | 1.082         | Q9Y3E7       | CHMP3     | Charged multivesicular body protein 3                 |
| 0.984           | 1.007        | 0.989        | 0.997        | 0.987        | 1.016        | 0.997        | 0.988        | 0.982        | 1.033         | 1.021         | 1.027         | Q9H444       | CHMP4B    | Charged multivesicular body protein 4b                |
| 0.988           | 1.005        | 1.027        | 1.009        | 0.985        | 1.055        | 1.011        | 0.892        | 1.019        | 1.073         | 0.970         | 1.138         | Q96CF2       | CHMP4C    | Charged multivesicular body protein 4c                |
| 0.993           | 1.002        | 0.994        | 0.966        | 0.953        | 1.002        | 0.976        | 0.905        | 0.981        | 0.979         | 1.004         | 0.966         | Q9NZZ3       | CHMP5     | Charged multivesicular body protein 5                 |
| 0.991           | 0.932        | 1.059        | 1.109        | 0.981        | 1.065        | 1.061        | 0.968        | 0.986        | 1.055         | 0.951         | 1.022         | Q96FZ7       | CHMP6     | Charged multivesicular body protein 6                 |
| 1.025           | 1.009        | 1.043        | 0.975        | 0.922        | 1.045        | 1.010        | 1.042        | 1.032        | 0.971         | 0.936         | 1.079         | Q8WUX9       | CHMP7     | Charged multivesicular body protein 7                 |
| 0.933           | 1.027        | 1.044        | 0.971        | 0.939        | 0.956        | 1.039        | 1.151        | 0.986        | 0.978         | 0.935         | 0.991         | O60921       | HUS1      | Checkpoint protein HUS1                               |
| 1.020           | 0.998        | 1.037        | 1.007        | 1.030        | 1.021        | 0.991        | 1.041        | 1.021        | 0.998         | 0.983         | 1.005         | Q9BWS9       | CHID1     | Chitinase domain-containing protein 1                 |
| 0.986           | 0.994        | 1.034        | 1.039        | 1.066        | 1.058        | 1.081        | 0.959        | 1.023        | 1.063         | 0.937         | 1.055         | Q9BT22       | ALG1      | Chitobiosyldiphosphodolichol beta-mannosyltransferase |
| 1.018           | 0.999        | 1.041        | 0.965        | 0.886        | 1.008        | 1.032        | 0.995        | 0.993        | 1.036         | 0.963         | 1.039         | Q96S66       | CLCC1     | Chloride channel CLIC-like protein 1                  |
| 1.140           | 1.027        | 1.003        | 1.052        | 1.323        | 0.949        | 1.047        | 0.943        | 1.063        | 1.003         | 1.001         | 0.997         | O00299       | CLIC1     | Chloride intracellular channel protein 1              |
|                 |              |              | 1.200        | 1.546        | 0.999        |              |              |              |               |               |               | O95833       | CLIC3     | Chloride intracellular channel protein 3              |
| 1.039           | 1.032        | 1.012        | 1.002        | 1.062        | 0.950        | 1.043        | 1.009        | 1.017        | 1.001         | 0.966         | 1.050         | Q9Y696       | CLIC4     | Chloride intracellular channel protein 4              |
| 1.471           | 0.974        | 1.115        | 0.941        | 1.365        | 0.999        | 1.074        | 0.824        | 1.155        | 0.940         | 0.978         | 1.052         | Q96NY7       | CLIC6     | Chloride intracellular channel protein 6              |
| 1.033           | 1.090        | 1.078        | 1.074        | 0.942        | 1.193        | 1.096        | 1.225        | 1.104        | 1.223         | 1.019         | 1.127         | P51797       | CLCN6     | Chloride transport protein 6                          |
| 0.994           | 1.134        | 0.984        |              |              |              | 1.146        | 1.136        | 0.932        | 0.880         | 1.041         | 1.087         | P35790       | CHKA      | Choline kinase alpha                                  |
|                 |              |              | 0.915        | 0.819        | 0.909        |              |              |              |               |               |               | Q9Y259       | CHKB      | Choline/ethanolamine kinase                           |
| 1.020           | 1.021        | 1.072        | 0.978        | 0.887        | 1.029        | 0.981        | 1.088        | 1.056        | 1.072         | 1.026         | 1.098         | Q9Y6K0       | CEPT1     | Choline/ethanolaminephosphotransferase 1              |
| 0.975           | 0.870        | 1.016        | 0.999        | 0.874        | 1.019        | 1.029        | 0.823        | 0.991        | 1.061         | 0.862         | 1.043         | C9JEJ2       | PCYT1A    | Choline-phosphate cytidyltransferase A                |
| 0.852           | 0.953        | 0.959        | 0.930        | 0.829        | 1.047        | 1.106        | 1.009        | 1.019        | 1.039         | 0.849         | 1.019         | Q8WUD6       | CHPT1     | Cholinephosphotransferase 1                           |
| 0.978           | 0.984        | 0.968        |              |              |              |              |              |              |               |               |               | Q9P2E5       | CHPF2     | Chondroitin sulfate glucuronyltransferase             |

| Abundance Ratio |              |              |              |              |              |              |              |              |               |               |               | Accession ID | Gene name  | Protein Description                                     |
|-----------------|--------------|--------------|--------------|--------------|--------------|--------------|--------------|--------------|---------------|---------------|---------------|--------------|------------|---------------------------------------------------------|
| 1 d<br>M1/C1    | 1 d<br>M2/C2 | 1 d<br>M3/C3 | 4 d<br>M1/C1 | 4 d<br>M2/C2 | 4 d<br>M3/C3 | 7 d<br>M1/C1 | 7 d<br>M2/C2 | 7 d<br>M3/C3 | 10 d<br>M1/C1 | 10 d<br>M2/C2 | 10 d<br>M3/C3 |              |            |                                                         |
| 1.054           | 1.087        | 1.082        | 1.055        | 0.822        | 0.937        | 0.988        | 1.136        | 1.018        | 1.000         | 0.945         | 1.110         | Q8TDX6       | CSGALNACT1 | Chondroitin sulfate N-acetylgalactosaminyltransferase 1 |
| 1.286           | 0.899        | 1.005        | 1.026        | 0.870        | 1.137        | 0.894        | 1.123        | 1.191        | 2.556         | 1.069         | 1.291         | Q8N6G5       | CSGALNACT2 | Chondroitin sulfate N-acetylgalactosaminyltransferase 2 |
| 0.929           | 1.060        | 1.106        | 1.257        | 0.666        | 1.236        | 1.027        | 0.957        | 0.893        |               |               |               | Q86X52       | CHSY1      | Chondroitin sulfate synthase 1                          |
|                 |              |              |              |              |              |              |              |              |               |               |               | Q8IZ52       | CHPF       | Chondroitin sulfate synthase 2                          |
|                 |              |              |              |              |              |              |              |              | 0.844         | 1.266         | 1.391         | Q70JA7       | CHSY3      | Chondroitin sulfate synthase 3                          |
|                 |              |              |              |              |              |              |              |              |               |               |               | Q9NRG0       | CHRA1      | Chromatin accessibility complex protein 1               |
| 1.026           | 1.029        | 1.024        | 1.022        | 1.015        | 1.034        | 0.986        | 1.102        | 1.043        | 0.933         | 1.010         | 1.014         | Q13111       | CHAF1A     | Chromatin assembly factor 1 subunit A                   |
| 1.009           | 1.023        | 1.055        | 0.924        | 0.945        | 1.100        | 0.963        | 1.265        | 0.924        | 1.021         | 1.018         | 1.025         | Q13112       | CHAF1B     | Chromatin assembly factor 1 subunit B                   |
| 0.957           | 0.987        | 1.038        | 1.029        | 0.932        | 1.041        | 0.982        | 1.210        | 0.943        | 0.898         | 0.907         | 1.015         | P83916       | CBX1       | Chromobox protein homolog 1                             |
| 1.060           | 1.000        | 1.019        | 0.984        | 0.936        | 0.975        | 0.951        | 0.990        | 0.951        | 0.899         | 0.956         | 0.893         | Q14781       | CBX2       | Chromobox protein homolog 2                             |
| 0.978           | 0.918        | 1.020        | 0.928        | 0.897        | 1.109        | 0.890        | 1.277        | 0.899        | 1.123         | 1.675         | 1.258         | Q13185       | CBX3       | Chromobox protein homolog 3                             |
| 1.019           | 1.006        | 0.982        | 0.978        | 1.000        | 1.005        | 0.955        | 0.941        | 0.982        | 0.956         | 1.008         | 0.948         | P45973       | CBX5       | Chromobox protein homolog 5                             |
| 0.991           | 0.985        | 1.013        | 0.964        | 1.050        | 0.964        | 1.007        | 0.884        | 0.994        | 0.969         | 0.933         | 0.957         | O95503       | CBX6       | Chromobox protein homolog 6                             |
| 1.056           | 1.046        | 1.042        | 1.003        | 0.959        | 0.936        | 1.070        | 0.910        | 0.975        | 1.033         | 1.185         | 1.126         | Q9HC52       | CBX8       | Chromobox protein homolog 8                             |
| 1.063           | 0.964        | 1.079        | 1.010        | 0.982        | 0.992        | 1.003        | 0.986        | 0.993        | 1.041         | 1.018         | 1.123         | Q9Y232       | CDYL       | Chromodomain Y-like protein                             |
| 1.024           | 0.969        | 1.023        | 0.920        | 0.906        | 1.010        | 0.955        | 1.019        | 1.038        | 0.939         | 0.963         | 0.995         | O14646       | CHD1       | Chromodomain-helicase-DNA-binding protein 1             |
| 1.013           | 0.986        | 0.984        | 1.002        | 0.954        | 1.028        | 1.012        | 1.009        | 1.001        | 0.996         | 1.005         | 1.090         | Q86WJ1       | CHD1L      | Chromodomain-helicase-DNA-binding protein 1-like        |
| 1.014           | 0.991        | 1.023        | 0.985        | 0.958        | 1.012        | 1.010        | 1.075        | 1.014        | 0.989         | 0.974         | 1.031         | O14647       | CHD2       | Chromodomain-helicase-DNA-binding protein 2             |
| 1.008           | 1.008        | 1.016        | 1.009        | 0.932        | 1.031        | 1.009        | 0.976        | 1.006        | 0.952         | 0.970         | 1.012         | H7C0J3       | CHD3       | Chromodomain-helicase-DNA-binding protein 3 (Fragment)  |
| 1.006           | 0.819        | 1.189        | 0.982        | 0.735        | 0.969        |              |              |              | 0.918         | 1.044         | 1.268         | Q8TDI0       | CHD5       | Chromodomain-helicase-DNA-binding protein 5             |
| 1.061           | 0.972        | 1.002        | 0.865        | 0.969        | 1.067        | 0.912        | 1.181        | 0.988        |               |               |               | Q8TD26       | CHD6       | Chromodomain-helicase-DNA-binding protein 6             |
| 0.998           | 1.008        | 1.006        | 0.995        | 0.917        | 0.960        | 0.917        | 1.070        | 0.980        | 0.905         | 0.964         | 0.993         | Q9HCK8       | CHD8       | Chromodomain-helicase-DNA-binding protein 8             |
| 1.097           | 1.011        | 1.011        | 0.962        | 0.956        | 1.065        | 1.070        | 1.019        | 1.014        | 0.837         | 1.242         | 0.901         | Q3L8U1       | CHD9       | Chromodomain-helicase-DNA-binding protein 9             |
|                 |              |              | 1.025        | 0.910        | 1.033        | 1.092        | 1.034        | 1.064        |               |               |               | A0A0C4DFN5   | TCTN3      | Chromosome 10 open reading frame 61                     |
| 0.999           | 1.035        | 1.001        | 0.985        | 0.942        | 1.024        | 0.991        | 1.058        | 1.036        | 1.054         | 0.972         | 0.972         | A0A0B4J220   | C11orf98   | Chromosome 11 open reading frame 48, isoform CRA_c      |
| 0.947           | 1.070        | 0.997        | 0.991        | 0.935        | 1.017        | 1.006        | 1.084        | 1.106        | 1.349         | 1.130         | 1.207         | F5H7W8       | C12orf43   | Chromosome 12 open reading frame 43, isoform CRA_a      |
| 0.876           | 0.970        | 1.029        | 1.011        | 0.981        | 0.960        | 1.058        | 0.964        | 0.959        | 1.204         | 1.018         | 1.219         | F8VQD4       | C12orf75   | Chromosome 12 open reading frame 75 (Fragment)          |
| 1.031           | 0.979        | 0.996        | 0.956        | 0.947        | 0.952        | 1.007        | 1.101        | 1.007        | 0.896         | 0.922         | 1.090         | Q5BIX2       | ARKL1      | Chromosome 18 open reading frame 25, isoform CRA_a      |
| 1.046           | 0.816        | 1.046        | 1.003        | 0.686        | 1.141        | 1.264        | 0.951        | 1.021        | 0.887         | 0.958         | 0.999         | A0A087WXX8   | FAM83D     | Chromosome 20 open reading frame 129                    |

| Abundance Ratio |              |              |              |              |              |              |              |              |               |               |               | Accession ID | Gene name | Protein Description                                                  |
|-----------------|--------------|--------------|--------------|--------------|--------------|--------------|--------------|--------------|---------------|---------------|---------------|--------------|-----------|----------------------------------------------------------------------|
| 1 d<br>M1/C1    | 1 d<br>M2/C2 | 1 d<br>M3/C3 | 4 d<br>M1/C1 | 4 d<br>M2/C2 | 4 d<br>M3/C3 | 7 d<br>M1/C1 | 7 d<br>M2/C2 | 7 d<br>M3/C3 | 10 d<br>M1/C1 | 10 d<br>M2/C2 | 10 d<br>M3/C3 |              |           |                                                                      |
| 1.051           | 1.006        | 1.045        | 0.980        | 0.944        | 1.026        | 0.961        | 1.023        | 1.012        | 0.991         | 1.006         | 1.039         | Q96JM3       | CHAMP1    | Chromosome alignment-maintaining phosphoprotein 1                    |
| 1.060           | 1.040        | 1.072        | 0.962        | 0.844        | 0.846        |              |              |              | 0.958         | 1.047         | 1.031         | H0YAV5       | CHTF8     | Chromosome transmission fidelity protein 8 homolog (Fragment)        |
| 0.996           | 0.990        | 0.979        | 0.958        | 0.944        | 1.049        | 0.932        | 1.087        | 0.988        | 0.970         | 1.027         | 0.997         | P0CG12       | CHTF8     | Chromosome transmission fidelity protein 8 homolog isoform 2         |
| 0.976           | 0.993        | 1.016        | 1.037        | 0.878        | 0.990        | 0.973        | 1.067        | 1.054        | 0.954         | 0.885         | 1.129         | O95239       | KIF4A     | Chromosome-associated kinesin KIF4A                                  |
| 0.917           | 0.932        | 0.863        | 1.014        | 1.102        | 1.048        | 1.258        | 1.079        | 0.992        | 1.648         | 1.068         | 1.614         | P17538       | CTRB1     | Chymotrypsinogen B                                                   |
| 1.055           | 0.996        | 1.005        | 1.007        | 0.942        | 1.016        | 0.944        | 1.031        | 0.956        | 0.960         | 1.016         | 0.924         | Q9Y6A4       | CFAP20    | Cilia- and flagella-associated protein 20                            |
| 1.014           | 1.026        | 0.982        | 1.020        | 0.962        | 1.064        | 1.092        | 1.159        | 1.099        | 0.975         | 0.987         | 0.996         | Q96G28       | CFAP36    | Cilia- and flagella-associated protein 36                            |
| 0.796           | 0.937        | 1.008        |              |              |              |              |              |              | 1.156         | 1.111         | 1.184         | Q9UL16       | CFAP45    | Cilia- and flagella-associated protein 45                            |
| 1.345           | 1.404        | 0.879        | 0.931        | 1.077        | 0.958        | 0.718        | 0.789        | 0.587        |               |               |               | Q9P2B7       | CFAP97    | Cilia- and flagella-associated protein 97                            |
| 0.964           | 0.951        | 1.009        | 0.955        | 0.908        | 1.021        | 0.838        | 0.620        | 1.024        | 1.227         | 1.004         | 1.102         | Q9P2M7       | CGN       | Cingulin                                                             |
| 0.974           | 0.989        | 0.984        | 1.043        | 1.050        | 1.027        | 1.039        | 0.945        | 0.984        | 1.050         | 1.033         | 1.071         | J3KPP4       | LUC7L3    | Cisplatin resistance-associated overexpressed protein, isoform CRA_b |
| 1.002           | 0.981        | 1.031        | 0.968        | 0.971        | 1.032        | 0.943        | 0.924        | 0.987        | 1.059         | 0.994         | 1.057         | Q8N0X4       | CLYBL     | Citrate lyase subunit beta-like protein, mitochondrial               |
| 1.003           | 0.994        | 1.005        | 0.994        | 1.040        | 0.988        | 1.016        | 1.003        | 0.996        | 1.013         | 0.987         | 0.979         | O75390       | CS        | Citrate synthase, mitochondrial                                      |
|                 |              |              | 0.917        | 1.023        | 0.658        | 0.921        | 0.953        | 1.186        |               |               |               | A0A087WYG2   | MAPK8IP3  | C-Jun-amino-terminal kinase-interacting protein 3                    |
| 1.014           | 1.013        | 1.012        | 1.010        | 1.013        | 1.018        | 1.012        | 1.022        | 1.014        | 1.022         | 1.007         | 1.040         | O60271       | SPAG9     | C-Jun-amino-terminal kinase-interacting protein 4                    |
| 0.772           | 0.952        | 0.947        | 0.938        | 0.907        | 1.031        | 0.964        | 0.742        | 0.975        | 1.004         | 0.984         | 1.085         | Q96MX0       | CMTM3     | CKLF-like MARVEL transmembrane domain-containing protein 3           |
|                 |              |              | 0.941        | 1.059        | 1.024        |              |              |              | 1.328         | 1.072         | 1.140         | Q8IZR5       | CMTM4     | CKLF-like MARVEL transmembrane domain-containing protein 4           |
| 0.923           | 0.949        | 0.906        | 1.010        | 0.863        | 1.141        | 1.071        | 0.807        | 0.986        | 1.317         | 1.114         | 1.279         | Q9NX76       | CMTM6     | CKLF-like MARVEL transmembrane domain-containing protein 6           |
| 0.865           | 0.951        | 0.982        |              |              |              |              |              |              | 0.900         | 0.880         | 1.008         | Q9HAW4       | CLSPN     | Claspin                                                              |
| 1.093           | 1.040        | 1.098        | 0.974        | 0.979        | 0.947        | 1.048        | 0.978        | 0.952        | 1.024         | 0.989         | 0.985         | O14503       | BHLHE40   | Class E basic helix-loop-helix protein 40                            |
| 1.135           | 0.985        | 1.009        | 0.997        | 0.917        | 0.866        | 1.008        | 1.133        | 1.008        | 1.028         | 1.051         | 0.967         | P53675       | CLTCL1    | Clathrin heavy chain 2                                               |
| 0.989           | 1.006        | 0.995        | 1.004        | 1.064        | 0.997        | 0.993        | 1.021        | 1.048        | 0.954         | 1.001         | 0.967         | A0A087WVQ6   | CLTC      | Clathrin heavy chain                                                 |
| 0.996           | 1.003        | 1.000        | 0.999        | 0.988        | 1.000        | 0.989        | 0.983        | 0.991        | 1.023         | 1.002         | 1.019         | Q14677       | CLINT1    | Clathrin interactor 1                                                |
| 0.963           | 1.007        | 1.166        | 1.103        | 1.168        | 1.155        | 1.177        | 0.877        | 1.067        | 1.041         | 1.091         | 1.174         | A0A0R4J2F2   | CLDND1    | Claudin domain-containing protein 1                                  |
| 1.187           | 0.811        | 0.988        | 1.250        | 0.835        | 1.076        | 1.181        | 0.900        | 1.104        | 1.221         | 1.100         | 1.095         | O95832       | CLDN1     | Claudin-1                                                            |
| 0.850           | 1.003        | 0.960        | 1.066        | 0.976        | 1.353        | 1.236        | 1.071        | 1.064        |               |               |               | O75508       | CLDN11    | Claudin-11                                                           |
| 1.019           | 1.010        | 1.029        | 1.001        | 0.963        | 1.021        | 1.020        | 1.012        | 1.000        | 0.988         | 0.989         | 1.023         | Q10570       | CPSF1     | Cleavage and polyadenylation specificity factor subunit 1            |

| Abundance Ratio |              |              |              |              |              |              |              |              |               |               |               | Accession ID | Gene name | Protein Description                                                      |
|-----------------|--------------|--------------|--------------|--------------|--------------|--------------|--------------|--------------|---------------|---------------|---------------|--------------|-----------|--------------------------------------------------------------------------|
| 1 d<br>M1/C1    | 1 d<br>M2/C2 | 1 d<br>M3/C3 | 4 d<br>M1/C1 | 4 d<br>M2/C2 | 4 d<br>M3/C3 | 7 d<br>M1/C1 | 7 d<br>M2/C2 | 7 d<br>M3/C3 | 10 d<br>M1/C1 | 10 d<br>M2/C2 | 10 d<br>M3/C3 |              |           |                                                                          |
| 1.021           | 0.986        | 1.027        | 0.975        | 0.994        | 1.013        | 1.014        | 1.038        | 1.019        | 1.015         | 1.004         | 1.049         | Q9P2I0       | CPSF2     | Cleavage and polyadenylation specificity factor subunit 2                |
| 1.041           | 1.020        | 1.021        | 0.995        | 0.964        | 1.003        | 1.002        | 1.043        | 0.971        | 0.982         | 1.003         | 1.013         | Q9UKF6       | CPSF3     | Cleavage and polyadenylation specificity factor subunit 3                |
| 0.989           | 1.111        | 1.025        | 0.992        | 1.154        | 0.977        | 1.030        | 0.955        | 0.999        | 1.044         | 1.007         | 1.030         | O95639       | CPSF4     | Cleavage and polyadenylation specificity factor subunit 4                |
| 1.010           | 0.986        | 0.977        | 0.978        | 0.956        | 1.009        | 0.998        | 1.005        | 0.968        | 1.033         | 1.004         | 0.972         | O43809       | NUDT21    | Cleavage and polyadenylation specificity factor subunit 5                |
| 1.059           | 1.015        | 0.990        | 1.019        | 0.968        | 0.975        | 1.049        | 0.966        | 0.986        | 1.054         | 1.011         | 0.982         | Q05048       | CSTF1     | Cleavage stimulation factor subunit 1                                    |
| 1.038           | 0.992        | 1.020        | 0.977        | 0.998        | 1.002        | 0.996        | 1.009        | 1.033        | 0.947         | 0.990         | 1.009         | P33240       | CSTF2     | Cleavage stimulation factor subunit 2                                    |
| 1.033           | 0.952        | 1.113        | 1.045        | 1.026        | 1.010        | 1.032        | 1.057        | 1.010        | 0.979         | 0.974         | 1.056         | Q9H0L4       | CSTF2T    | Cleavage stimulation factor subunit 2 tau variant                        |
| 1.030           | 1.011        | 1.019        | 0.994        | 1.000        | 0.979        | 0.972        | 1.004        | 0.985        | 0.980         | 1.012         | 1.004         | Q12996       | CSTF3     | Cleavage stimulation factor subunit 3                                    |
| 0.994           | 1.007        | 0.985        | 1.036        | 0.996        | 1.020        | 1.093        | 1.098        | 1.052        | 1.067         | 1.082         | 1.047         | O96005       | CLPTM1    | Cleft lip and palate transmembrane protein 1                             |
| 1.007           | 0.991        | 0.997        | 0.998        | 0.924        | 1.027        | 1.092        | 1.136        | 1.017        | 1.173         | 1.072         | 1.087         | Q96KA5       | CLPTM1L   | Cleft lip and palate transmembrane protein 1-like protein                |
| 0.975           | 0.991        | 1.009        | 0.978        | 0.940        | 0.984        | 0.987        | 0.965        | 1.001        | 1.001         | 0.975         | 1.021         | Q7Z460       | CLASP1    | CLIP-associating protein 1                                               |
| 0.878           | 0.930        | 0.985        | 0.994        | 0.967        | 1.033        | 0.954        | 1.347        | 1.135        |               |               |               | E3W994       | CLASP2    | CLIP-associating protein 2                                               |
| 1.081           | 0.995        | 1.064        | 1.023        | 0.999        | 1.027        | 1.056        | 1.018        | 1.045        | 0.951         | 0.894         | 1.085         | A0A0A0MQS2   | CLASRP    | CLK4-associating serine/arginine-rich protein                            |
| 0.942           | 1.007        | 0.983        | 0.990        | 0.893        | 1.043        | 1.016        | 1.024        | 1.063        | 1.005         | 1.039         | 1.101         | I3L2B0       | CLUH      | Clustered mitochondria protein homolog (Fragment)                        |
| 0.982           | 1.001        | 1.024        | 1.025        | 0.981        | 1.037        | 1.025        | 1.028        | 1.026        | 0.987         | 0.994         | 1.075         | O75153       | CLUH      | Clustered mitochondria protein homolog                                   |
| 1.143           | 0.900        | 1.011        | 1.081        | 1.053        | 1.037        | 1.107        | 1.067        | 1.003        | 1.020         | 0.987         | 1.007         | J3KNW5       | CLUAP1    | Clusterin-associated protein 1                                           |
| 1.161           | 0.943        | 1.015        | 0.830        | 1.020        | 1.096        | 1.085        | 0.912        | 1.350        | 0.875         | 1.259         | 1.106         | I3L2E1       | CLUAP1    | Clusterin-associated protein 1                                           |
| 0.978           | 1.006        | 0.999        | 0.958        | 0.950        | 1.013        | 1.060        | 1.123        | 1.083        | 1.028         | 1.001         | 1.109         | Q8IY22       | CMIP      | C-Maf-inducing protein                                                   |
|                 |              |              | 1.053        | 0.926        | 1.230        | 0.909        | 1.013        | 1.060        | 0.935         | 0.918         | 1.045         | Q11201       | ST3GAL1   | CMP-N-acetylneuraminate-beta-galactosamide-alpha-2,3-sialyltransferase 1 |
|                 |              |              |              |              |              | 0.996        | 1.261        | 1.089        |               |               |               | Q16842       | ST3GAL2   | CMP-N-acetylneuraminate-beta-galactosamide-alpha-2,3-sialyltransferase 2 |
| 1.157           | 1.070        | 0.964        | 1.053        | 1.014        | 1.104        | 1.053        | 1.184        | 1.044        | 1.092         | 1.130         | 0.965         | P78382       | SLC35A1   | CMP-sialic acid transporter                                              |
| 0.985           | 0.931        | 0.991        | 0.928        | 1.090        | 1.033        | 1.077        | 1.011        | 1.043        | 1.169         | 1.077         | 1.108         | A0A0U1RR27   | DENND4A   | C-myc promoter-binding protein                                           |
| 1.014           | 0.996        | 0.995        | 0.978        | 0.970        | 0.994        | 0.980        | 1.025        | 0.980        | 0.973         | 0.966         | 0.975         | Q14019       | COTL1     | Coactosin-like protein                                                   |
| 1.142           | 1.015        | 0.955        | 0.970        | 0.883        | 1.147        | 0.939        | 1.125        | 0.979        | 1.010         | 1.020         | 1.025         | A0A0A0MRJ7   | F5        | Coagulation factor V                                                     |
| 0.999           | 0.980        | 1.000        | 0.982        | 0.982        | 0.989        | 0.948        | 1.030        | 1.025        | 0.961         | 0.968         | 0.954         | M0QXB4       | COPE      | Coatomer protein complex, subunit epsilon, isoform CRA_g                 |
| 1.000           | 1.011        | 1.003        | 1.008        | 0.998        | 0.979        | 0.996        | 1.023        | 0.993        | 0.995         | 0.980         | 0.971         | P53621       | COPA      | Coatomer subunit alpha                                                   |
| 0.994           | 1.014        | 1.004        | 0.981        | 0.964        | 0.997        | 0.978        | 1.081        | 1.006        | 0.946         | 0.983         | 0.961         | P53618       | COPB1     | Coatomer subunit beta                                                    |
| 0.989           | 0.996        | 0.991        | 0.992        | 0.984        | 0.987        | 0.963        | 1.011        | 0.985        | 0.968         | 0.967         | 0.991         | P35606       | COPB2     | Coatomer subunit beta'                                                   |

| Abundance Ratio |              |              |              |              |              |              |              |              |               |               |               | Accession ID | Gene name | Protein Description                                              |
|-----------------|--------------|--------------|--------------|--------------|--------------|--------------|--------------|--------------|---------------|---------------|---------------|--------------|-----------|------------------------------------------------------------------|
| 1 d<br>M1/C1    | 1 d<br>M2/C2 | 1 d<br>M3/C3 | 4 d<br>M1/C1 | 4 d<br>M2/C2 | 4 d<br>M3/C3 | 7 d<br>M1/C1 | 7 d<br>M2/C2 | 7 d<br>M3/C3 | 10 d<br>M1/C1 | 10 d<br>M2/C2 | 10 d<br>M3/C3 |              |           |                                                                  |
| 0.993           | 0.997        | 1.024        | 0.986        | 0.999        | 1.002        | 0.986        | 1.007        | 1.020        | 0.970         | 0.952         | 1.011         | Q9Y678       | COPG1     | Coatomer subunit gamma-1                                         |
| 1.005           | 0.992        | 1.022        | 1.006        | 0.997        | 1.031        | 0.994        | 1.033        | 1.032        | 0.976         | 1.025         | 0.992         | Q9UBF2       | COPG2     | Coatomer subunit gamma-2                                         |
| 1.013           | 0.997        | 0.972        | 0.978        | 0.903        | 0.966        | 0.974        | 1.076        | 0.980        | 0.958         | 1.003         | 0.943         | F8VVA7       | COPZ1     | Coatomer subunit zeta-1                                          |
| 1.025           | 0.986        | 0.984        | 0.996        | 1.012        | 1.041        | 1.037        | 1.041        | 1.001        | 1.087         | 1.031         | 1.059         | Q96EY8       | MMAB      | Cob(I)yrinic acid a,c-diamide adenosyltransferase, mitochondrial |
| 1.101           | 1.018        | 1.051        | 1.035        | 0.969        | 1.030        | 1.005        | 1.067        | 0.957        | 0.990         | 1.007         | 1.001         | Q8IU1        | CBWD2     | COBW domain-containing protein 2                                 |
| 0.920           | 0.930        | 1.018        | 0.848        | 1.034        | 1.099        | 0.902        | 0.663        | 0.915        | 1.064         | 1.031         | 0.975         | Q8IWY9       | CDAN1     | Codanin-1                                                        |
| 0.992           | 0.954        | 1.046        | 0.936        | 0.894        | 0.926        | 0.968        | 1.149        | 1.048        | 0.876         | 0.918         | 1.091         | Q9H8M1       | COQ10B    | Coenzyme Q-binding protein COQ10 homolog B, mitochondrial        |
| 1.110           | 1.002        | 0.958        | 1.048        | 1.149        | 1.000        | 1.021        | 0.967        | 1.060        | 0.986         | 0.984         | 0.935         | E9PK25       | CFL1      | Cofilin-1                                                        |
| 0.991           | 0.987        | 0.979        | 0.979        | 1.006        | 1.029        | 0.992        | 0.929        | 1.009        | 1.029         | 0.993         | 1.005         | Q9Y281       | CFL2      | Cofilin-2                                                        |
| 1.025           | 1.021        | 1.051        | 0.957        | 0.944        | 1.036        | 0.976        | 0.968        | 1.029        | 0.926         | 0.923         | 0.978         | Q8WVM7       | STAG1     | Cohesin subunit SA-1                                             |
| 0.991           | 1.029        | 1.055        | 1.002        | 0.986        | 0.992        | 1.009        | 0.990        | 0.991        | 0.978         | 0.979         | 1.060         | Q6P1N0       | CC2D1A    | Coiled-coil and C2 domain-containing protein 1A                  |
| 1.204           | 1.078        | 0.861        |              |              |              |              |              |              |               |               |               | Q9P2K1       | CC2D2A    | Coiled-coil and C2 domain-containing protein 2A                  |
| 1.004           | 0.978        | 0.975        | 1.010        | 0.941        | 1.013        | 1.012        | 1.067        | 0.987        | 1.041         | 1.025         | 1.095         | J3KR35       | CCDC12    | Coiled-coil domain containing 12, isoform CRA_a                  |
| 1.025           | 1.041        | 1.121        | 1.009        | 0.894        | 0.959        | 1.019        | 1.092        | 1.058        | 1.014         | 0.919         | 1.120         | Q96A19       | CCDC102A  | Coiled-coil domain-containing protein 102A                       |
| 1.110           | 0.966        | 1.094        | 0.810        | 1.010        | 1.286        |              |              |              |               |               |               | Q9BWC9       | CCDC106   | Coiled-coil domain-containing protein 106                        |
| 1.039           | 0.970        | 0.993        | 1.084        | 1.024        | 1.057        | 1.186        | 0.937        | 0.952        | 1.064         | 0.987         | 1.050         | Q96NT0       | CCDC115   | Coiled-coil domain-containing protein 115                        |
| 1.004           | 0.953        | 1.113        | 1.130        | 1.113        | 1.006        | 0.945        | 0.897        | 0.885        | 1.340         | 1.025         | 1.411         | Q8IWD4       | CCDC117   | Coiled-coil domain-containing protein 117                        |
| 0.974           | 0.944        | 1.019        | 0.957        | 0.967        | 1.040        | 0.934        | 0.828        | 0.988        | 1.027         | 0.997         | 1.024         | Q96CT7       | CCDC124   | Coiled-coil domain-containing protein 124                        |
| 1.066           | 1.004        | 1.554        |              |              |              | 0.785        | 0.958        | 0.949        | 1.098         | 0.585         | 0.948         | Q96EE4       | CCDC126   | Coiled-coil domain-containing protein 126                        |
| 0.957           | 0.960        | 0.989        | 0.927        | 0.968        | 1.009        | 0.973        | 0.962        | 0.995        | 0.953         | 0.906         | 0.942         | Q96BQ5       | CCDC127   | Coiled-coil domain-containing protein 127                        |
|                 |              |              |              |              |              | 0.836        | 1.196        | 1.014        | 0.961         | 1.104         | 0.975         | P13994       | CCDC130   | Coiled-coil domain-containing protein 130                        |
| 1.036           | 0.949        | 1.032        | 0.997        | 0.959        | 0.997        | 1.025        | 1.017        | 0.989        | 0.998         | 0.963         | 0.986         | Q9H6E4       | CCDC134   | Coiled-coil domain-containing protein 134                        |
| 1.064           | 0.999        | 1.060        | 1.048        | 0.994        | 1.120        | 1.082        | 0.979        | 1.036        | 1.022         | 1.038         | 1.028         | I3LOU5       | CCDC137   | Coiled-coil domain-containing protein 137 (Fragment)             |
| 0.831           | 1.076        | 0.884        | 1.005        | 1.480        | 1.042        | 1.165        | 0.998        | 0.935        | 1.256         | 1.048         | 1.131         | Q5M9N0       | CCDC158   | Coiled-coil domain-containing protein 158                        |
| 1.103           | 1.018        | 1.147        | 0.978        | 0.828        | 0.978        | 1.039        | 1.179        | 0.972        | 0.973         | 1.028         | 1.077         | Q6PII3       | CCDC174   | Coiled-coil domain-containing protein 174                        |
| 0.916           | 0.914        | 1.034        | 1.013        | 0.924        | 0.968        | 1.054        | 0.852        | 0.945        | 1.267         | 0.915         | 1.104         | Q7Z3E2       | CCDC186   | Coiled-coil domain-containing protein 186                        |
| 1.020           | 0.992        | 0.999        | 1.010        | 0.977        | 1.034        | 1.002        | 1.038        | 1.046        | 1.006         | 0.980         | 1.053         | O60826       | CCDC22    | Coiled-coil domain-containing protein 22                         |
| 0.966           | 1.000        | 0.994        | 1.035        | 0.982        | 1.013        | 1.022        | 1.023        | 0.986        | 1.039         | 1.028         | 1.017         | Q86WR0       | CCDC25    | Coiled-coil domain-containing protein 25                         |
| 0.980           | 1.037        | 1.165        | 0.956        | 0.953        | 0.959        | 0.940        | 0.955        | 1.021        | 0.978         | 1.062         | 1.025         | Q8IWP9       | CCDC28A   | Coiled-coil domain-containing protein 28A                        |
| 1.010           | 1.012        | 1.002        | 0.996        | 0.983        | 1.008        | 0.981        | 0.927        | 1.009        | 1.010         | 0.992         | 1.030         | Q96MW1       | CCDC43    | Coiled-coil domain-containing protein 43                         |
| 0.968           | 1.005        | 1.007        | 1.012        | 1.014        | 0.986        | 1.005        | 1.068        | 0.982        | 1.023         | 1.061         | 1.018         | Q96A33       | CCDC47    | Coiled-coil domain-containing protein 47                         |
| 0.992           | 1.002        | 1.102        | 1.020        | 0.963        | 1.028        | 0.971        | 0.982        | 1.020        | 1.057         | 1.024         | 1.027         | Q96ER9       | CCDC51    | Coiled-coil domain-containing protein 51                         |



| Abundance Ratio |              |              |              |              |              |              |              |              |               |               |               | Accession ID | Gene name | Protein Description                                                             |
|-----------------|--------------|--------------|--------------|--------------|--------------|--------------|--------------|--------------|---------------|---------------|---------------|--------------|-----------|---------------------------------------------------------------------------------|
| 1 d<br>M1/C1    | 1 d<br>M2/C2 | 1 d<br>M3/C3 | 4 d<br>M1/C1 | 4 d<br>M2/C2 | 4 d<br>M3/C3 | 7 d<br>M1/C1 | 7 d<br>M2/C2 | 7 d<br>M3/C3 | 10 d<br>M1/C1 | 10 d<br>M2/C2 | 10 d<br>M3/C3 |              |           |                                                                                 |
| 1.010           | 1.052        | 1.057        | 1.013        | 1.013        | 0.961        | 1.003        | 0.978        | 1.019        | 0.978         | 1.017         | 1.018         | Q4VC31       | CCDC58    | Coiled-coil domain-containing protein 58                                        |
| 0.998           | 0.945        | 1.013        | 1.004        | 0.932        | 1.014        | 1.025        | 1.005        | 1.010        | 1.029         | 1.022         | 1.074         | Q16204       | CCDC6     | Coiled-coil domain-containing protein 6                                         |
| 1.033           | 1.022        | 0.980        | 1.002        | 0.907        | 0.990        | 1.069        | 0.967        | 0.889        | 1.051         | 1.031         | 0.984         | Q9Y6R9       | CCDC61    | Coiled-coil domain-containing protein 61                                        |
| 1.013           | 1.101        | 0.900        | 1.041        | 0.802        | 0.883        | 0.962        | 1.255        | 0.990        |               |               |               | Q8N9Z2       | CCDC71L   | Coiled-coil domain-containing protein 71L                                       |
|                 |              |              | 1.551        | 0.720        | 1.262        |              |              |              |               |               |               | Q9BR77       | CCDC77    | Coiled-coil domain-containing protein 77                                        |
| 1.000           | 1.015        | 1.020        | 0.952        | 1.020        | 0.937        | 1.049        | 0.930        | 1.024        | 1.026         | 0.954         | 1.064         | Q8N4S0       | CCDC82    | Coiled-coil domain-containing protein 82                                        |
|                 |              |              | 0.973        | 0.910        | 1.141        |              |              |              |               |               |               | Q86UT8       | CCDC84    | Coiled-coil domain-containing protein 84                                        |
| 1.391           | 1.038        | 1.056        | 1.000        | 1.016        | 1.052        | 1.039        | 1.122        | 1.142        |               |               |               | Q15834       | CCDC85B   | Coiled-coil domain-containing protein 85B                                       |
| 1.010           | 0.974        | 1.025        | 1.033        | 0.969        | 1.031        | 0.969        | 0.917        | 0.997        | 1.025         | 1.026         | 1.058         | Q9H6F5       | CCDC86    | Coiled-coil domain-containing protein 86                                        |
| 0.988           | 0.984        | 1.001        | 0.970        | 0.953        | 1.059        | 1.001        | 0.882        | 0.979        | 1.049         | 1.030         | 1.122         | Q9Y3X0       | CCDC9     | Coiled-coil domain-containing protein 9                                         |
| 0.984           | 0.981        | 1.035        | 0.984        | 0.947        | 1.028        | 1.000        | 1.013        | 1.017        | 1.036         | 1.003         | 1.042         | Q9GZT6       | CCDC90B   | Coiled-coil domain-containing protein 90B, mitochondrial                        |
| 0.978           | 0.940        | 0.971        | 1.013        | 0.999        | 1.015        | 1.060        | 0.999        | 1.096        | 1.097         | 0.976         | 1.066         | Q7Z6B0       | CCDC91    | Coiled-coil domain-containing protein 91                                        |
| 1.018           | 1.015        | 0.976        | 1.000        | 1.004        | 0.992        | 1.036        | 1.029        | 1.011        | 1.036         | 0.991         | 1.045         | Q567U6       | CCDC93    | Coiled-coil domain-containing protein 93                                        |
| 0.948           | 1.018        | 1.046        | 1.010        | 0.997        | 0.987        | 0.952        | 1.113        | 1.033        | 1.000         | 1.006         | 1.091         | Q9BW85       | CCDC94    | Coiled-coil domain-containing protein 94                                        |
| 1.045           | 0.930        | 1.146        | 0.983        | 0.965        | 1.081        | 0.988        | 0.834        | 0.977        | 0.973         | 0.968         | 0.989         | Q96F63       | CCDC97    | Coiled-coil domain-containing protein 97                                        |
| 1.113           | 0.957        | 1.237        |              |              |              |              |              |              |               |               |               | A0A087X0M0   | R3HCC1L   | Coiled-coil domain-containing protein R3HCC1L                                   |
| 0.978           | 1.010        | 1.007        | 0.970        | 0.928        | 1.086        | 1.009        | 1.092        | 0.976        | 0.996         | 1.004         | 1.024         | Q96BP2       | CHCHD1    | Coiled-coil-helix-coiled-coil-helix domain-containing protein 1                 |
|                 |              |              |              |              |              |              |              |              | 0.619         | 0.913         | 0.933         | B5MBW9       | CHCHD10   | Coiled-coil-helix-coiled-coil-helix domain-containing protein 10, mitochondrial |
| 1.077           | 1.098        | 0.891        | 0.923        | 0.945        | 1.329        | 1.049        | 1.045        | 0.975        | 0.894         | 0.985         | 0.967         | Q9Y6H1       | CHCHD2    | Coiled-coil-helix-coiled-coil-helix domain-containing protein 2                 |
| 1.003           | 0.999        | 1.014        | 0.991        | 1.036        | 1.045        | 1.018        | 1.069        | 1.126        | 1.091         | 0.985         | 1.115         | P38432       | COIL      | Coilin                                                                          |
| 0.989           | 0.976        | 0.993        | 0.977        | 0.957        | 0.976        | 0.963        | 0.928        | 0.999        | 0.994         | 0.960         | 1.015         | Q14011       | CIRBP     | Cold-inducible RNA-binding protein                                              |
|                 |              |              | 1.146        | 0.985        | 1.249        |              |              |              |               |               |               | P12109       | COL6A1    | Collagen alpha-1(VI) chain                                                      |
|                 |              |              | 1.094        | 1.006        | 0.816        |              |              |              |               |               |               | Q99715       | COL12A1   | Collagen alpha-1(XII) chain                                                     |
| 1.034           | 1.004        | 1.034        | 0.979        | 1.002        | 1.011        | 1.007        | 1.024        | 0.995        | 0.999         | 0.944         | 1.009         | P39060       | COL18A1   | Collagen alpha-1(XVIII) chain                                                   |
| 1.013           | 1.114        | 1.059        | 1.027        | 1.011        | 0.949        | 0.995        | 1.159        | 0.952        | 1.053         | 0.973         | 1.076         | P08572       | COL4A2    | Collagen alpha-2(IV) chain                                                      |
| 1.120           | 1.003        | 1.048        | 1.431        | 0.989        | 1.193        | 1.081        | 1.248        | 1.024        | 0.951         | 0.905         | 1.068         | P12110       | COL6A2    | Collagen alpha-2(VI) chain                                                      |
| 0.969           | 1.014        | 1.026        | 0.971        | 0.971        | 1.043        | 0.966        | 1.063        | 1.056        | 0.996         | 0.885         | 1.062         | Q8N668       | COMMD1    | COMM domain-containing protein 1                                                |
| 0.988           | 0.964        | 1.072        | 1.015        | 0.989        | 1.023        | 0.982        | 1.068        | 1.030        | 1.008         | 0.955         | 1.030         | Q9Y6G5       | COMMD10   | COMM domain-containing protein 10                                               |
| 1.069           | 1.055        | 1.041        | 0.986        | 0.976        | 1.052        | 0.966        | 1.063        | 1.012        | 1.017         | 0.945         | 1.079         | Q86X83       | COMMD2    | COMM domain-containing protein 2                                                |
| 1.016           | 1.004        | 1.015        | 0.974        | 0.980        | 1.020        | 0.994        | 1.112        | 1.065        | 0.959         | 0.930         | 0.996         | Q9UBI1       | COMMD3    | COMM domain-containing protein 3                                                |
| 1.026           | 1.003        | 1.034        | 1.014        | 1.051        | 1.022        | 0.997        | 1.053        | 1.094        | 0.959         | 0.975         | 0.980         | Q9H0A8       | COMMD4    | COMM domain-containing protein 4                                                |

| Abundance Ratio |              |              |              |              |              |              |              |              |               |               |               | Accession ID | Gene name | Protein Description                                                          |
|-----------------|--------------|--------------|--------------|--------------|--------------|--------------|--------------|--------------|---------------|---------------|---------------|--------------|-----------|------------------------------------------------------------------------------|
| 1 d<br>M1/C1    | 1 d<br>M2/C2 | 1 d<br>M3/C3 | 4 d<br>M1/C1 | 4 d<br>M2/C2 | 4 d<br>M3/C3 | 7 d<br>M1/C1 | 7 d<br>M2/C2 | 7 d<br>M3/C3 | 10 d<br>M1/C1 | 10 d<br>M2/C2 | 10 d<br>M3/C3 |              |           |                                                                              |
| 1.040           | 0.985        | 1.054        | 0.995        | 0.918        | 1.049        | 1.015        | 1.009        | 1.024        | 0.988         | 0.905         | 1.011         | Q9GZQ3       | COMMD5    | COMM domain-containing protein 5                                             |
| 0.959           | 0.945        | 1.025        | 0.969        | 1.088        | 1.044        | 0.931        | 0.888        | 1.044        | 1.017         | 0.972         | 1.074         | Q7Z4G1       | COMMD6    | COMM domain-containing protein 6                                             |
| 0.961           | 0.961        | 1.018        | 0.966        | 0.933        | 1.005        | 1.012        | 1.044        | 1.047        | 0.922         | 0.908         | 0.947         | Q86VX2       | COMMD7    | COMM domain-containing protein 7                                             |
| 1.012           | 0.982        | 1.027        | 1.004        | 0.973        | 1.067        | 0.988        | 1.101        | 1.076        | 1.026         | 0.946         | 0.969         | Q9NX08       | COMMD8    | COMM domain-containing protein 8                                             |
| 1.004           | 1.001        | 1.043        | 0.971        | 0.960        | 1.042        | 0.938        | 0.968        | 1.023        | 0.987         | 1.018         | 1.041         | Q9P000       | COMMD9    | COMM domain-containing protein 9                                             |
| 1.036           | 1.026        | 1.050        | 1.009        | 0.953        | 0.992        | 1.079        | 1.077        | 1.015        | 1.022         | 0.836         | 1.073         | P01024       | C3        | Complement C3                                                                |
| 0.993           | 0.979        | 1.026        | 0.983        | 0.995        | 1.029        | 1.001        | 1.060        | 1.068        | 0.991         | 1.010         | 1.036         | Q07021       | C1QBP     | Complement component 1 Q subcomponent-binding protein, mitochondrial         |
| 0.893           | 0.984        | 1.026        |              |              |              |              |              |              |               |               |               | P10643       | C7        | Complement component C7                                                      |
| 1.018           | 0.984        | 1.033        | 1.128        | 1.000        | 1.055        | 1.052        | 1.153        | 1.002        | 1.046         | 1.106         | 1.020         | B1AP13       | CD55      | Complement decay-accelerating factor                                         |
| 1.051           | 0.979        | 1.040        | 1.045        | 1.146        | 1.056        | 1.304        | 1.097        | 1.160        | 1.019         | 1.081         | 1.149         | Q9NPL8       | TIMMDC1   | Complex I assembly factor TIMMDC1, mitochondrial                             |
| 1.007           | 0.940        | 0.811        | 1.025        | 1.159        | 0.956        | 0.991        | 1.057        | 1.106        | 0.997         | 1.050         | 1.053         | Q8IUX1       | TMEM126B  | Complex I assembly factor TMEM126B, mitochondrial                            |
| 1.071           | 0.966        | 1.145        | 1.060        | 0.873        | 1.024        | 1.069        | 1.049        | 1.009        | 1.037         | 0.929         | 1.094         | Q9Y375       | NDUFAF1   | Complex I intermediate-associated protein 30, mitochondrial                  |
| 0.766           | 0.999        | 0.961        | 0.944        | 0.819        | 0.802        | 1.113        | 0.961        | 1.393        | 1.017         | 0.962         | 0.998         | Q5U5X0       | LYRM7     | Complex III assembly factor LYRM7                                            |
|                 |              |              |              |              |              | 1.280        | 0.594        | 1.120        |               |               |               | O14810       | CPLX1     | Complexin-1                                                                  |
| 0.966           | 1.011        | 1.014        | 1.017        | 0.913        | 0.993        | 1.019        | 1.086        | 1.064        | 0.942         | 0.923         | 1.045         | Q15021       | NCAPD2    | Condensin complex subunit 1                                                  |
| 0.942           | 1.009        | 0.981        | 1.001        | 0.960        | 0.991        | 1.018        | 0.974        | 1.024        | 0.985         | 0.977         | 1.091         | Q15003       | NCAPH     | Condensin complex subunit 2                                                  |
| 0.993           | 1.000        | 1.006        | 0.988        | 0.904        | 1.018        | 1.032        | 1.022        | 1.020        | 1.009         | 0.857         | 1.116         | Q9BXP3       | NCAPG     | Condensin complex subunit 3                                                  |
| 1.033           | 1.041        | 1.049        | 0.951        | 0.855        | 1.002        | 1.001        | 1.152        | 0.977        | 0.946         | 0.983         | 1.056         | P42695       | NCAPD3    | Condensin-2 complex subunit D3                                               |
| 1.330           | 1.027        | 0.988        | 0.958        | 1.052        | 1.285        |              |              |              | 1.006         | 1.063         | 0.987         | P29279       | CTGF      | Connective tissue growth factor                                              |
| 0.934           | 1.019        | 0.879        | 0.982        | 1.009        | 1.041        | 0.997        | 1.170        | 0.977        | 1.190         | 1.126         | 1.317         | Q8WXI2       | CNKSR2    | Connector enhancer of kinase suppressor of ras 2                             |
|                 |              |              | 0.852        | 0.908        | 1.044        | 0.892        | 1.040        | 0.978        | 1.211         | 0.908         | 1.275         | Q6P9H4       | CNKSR3    | Connector enhancer of kinase suppressor of ras 3                             |
| 1.022           | 0.979        | 1.051        | 1.023        | 0.952        | 0.995        | 0.958        | 0.989        | 0.980        | 1.036         | 0.964         | 1.043         | Q8WTW3       | COG1      | Conserved oligomeric Golgi complex subunit 1                                 |
| 1.071           | 1.020        | 1.032        | 0.972        | 0.986        | 1.001        | 0.996        | 1.030        | 1.004        | 0.974         | 0.987         | 1.087         | Q14746       | COG2      | Conserved oligomeric Golgi complex subunit 2                                 |
| 0.984           | 1.013        | 1.037        | 0.984        | 0.975        | 1.000        | 0.947        | 1.095        | 0.993        | 0.976         | 1.024         | 0.996         | Q96JB2       | COG3      | Conserved oligomeric Golgi complex subunit 3                                 |
| 1.025           | 1.017        | 1.001        | 1.016        | 0.959        | 1.046        | 0.996        | 0.995        | 0.978        | 1.006         | 0.997         | 1.023         | J3KNI1       | COG4      | Conserved oligomeric Golgi complex subunit 4                                 |
| 0.992           | 0.970        | 1.043        | 0.982        | 0.965        | 1.009        | 0.979        | 1.073        | 1.027        | 0.974         | 0.975         | 1.020         | Q9Y2V7       | COG6      | Conserved oligomeric Golgi complex subunit 6                                 |
| 1.044           | 1.006        | 1.013        | 1.001        | 0.969        | 0.977        | 0.963        | 1.064        | 1.006        | 0.958         | 0.990         | 1.010         | P83436       | COG7      | Conserved oligomeric Golgi complex subunit 7                                 |
| 1.038           | 1.022        | 1.039        | 1.006        | 0.971        | 1.034        | 0.975        | 1.041        | 1.037        | 0.989         | 0.974         | 1.009         | Q96MW5       | COG8      | Conserved oligomeric Golgi complex subunit 8                                 |
| 0.954           | 1.003        | 1.025        | 0.989        | 0.937        | 0.982        | 0.929        | 1.050        | 1.061        | 0.874         | 0.966         | 0.993         | F5GY05       | FAM120B   | Constitutive coactivator of peroxisome proliferator-activated receptor gamma |
| 1.074           | 1.026        | 1.022        | 0.978        | 0.932        | 1.006        | 1.072        | 1.068        | 0.961        | 1.012         | 1.032         | 1.031         | Q9NX05       | FAM120C   | Constitutive coactivator of PPAR-gamma-like protein 2                        |

| Abundance Ratio |              |              |              |              |              |              |              |              |               |               |               | Accession ID | Gene name | Protein Description                                 |
|-----------------|--------------|--------------|--------------|--------------|--------------|--------------|--------------|--------------|---------------|---------------|---------------|--------------|-----------|-----------------------------------------------------|
| 1 d<br>M1/C1    | 1 d<br>M2/C2 | 1 d<br>M3/C3 | 4 d<br>M1/C1 | 4 d<br>M2/C2 | 4 d<br>M3/C3 | 7 d<br>M1/C1 | 7 d<br>M2/C2 | 7 d<br>M3/C3 | 10 d<br>M1/C1 | 10 d<br>M2/C2 | 10 d<br>M3/C3 |              |           |                                                     |
| 1.078           | 1.044        | 1.001        | 1.030        | 1.015        | 1.021        | 0.992        | 0.939        | 0.867        | 1.108         | 1.170         | 1.152         | Q8IWV2       | CNTN4     | Contactin-4                                         |
| 1.035           | 1.018        | 1.002        | 1.000        | 0.946        | 1.013        | 1.056        | 1.086        | 0.991        | 1.077         | 1.050         | 0.998         | P78357       | CNTNAP1   | Contactin-associated protein 1                      |
| 1.036           | 1.025        | 1.008        | 1.018        | 0.963        | 0.979        | 0.981        | 1.128        | 0.977        | 0.932         | 0.969         | 1.079         | Q9BZ76       | CNTNAP3   | Contactin-associated protein-like 3                 |
| 0.950           | 0.945        | 0.994        | 0.946        | 0.999        | 1.047        | 1.060        | 0.941        | 1.006        | 1.052         | 0.985         | 1.075         | Q9NQ92       | COPRS     | Coordinator of PRMT5 and differentiation stimulator |
| 1.001           | 0.996        | 0.993        | 1.037        | 1.008        | 1.020        | 1.040        | 1.029        | 1.037        | 1.036         | 1.003         | 1.035         | A8K070       | GPS1      | COP9 signalosome complex subunit 1                  |
| 1.017           | 0.983        | 1.010        | 0.994        | 0.964        | 1.005        | 0.986        | 1.063        | 1.021        | 0.968         | 0.976         | 0.976         | P61201       | COPS2     | COP9 signalosome complex subunit 2                  |
| 1.009           | 0.952        | 1.010        | 1.002        | 1.002        | 1.020        | 1.029        | 0.986        | 0.985        | 1.023         | 1.024         | 1.035         | Q9UNS2       | COPS3     | COP9 signalosome complex subunit 3                  |
| 1.013           | 0.992        | 1.007        | 1.008        | 0.996        | 0.978        | 0.994        | 1.041        | 0.996        | 0.956         | 1.002         | 0.975         | Q9BT78       | COPS4     | COP9 signalosome complex subunit 4                  |
| 1.014           | 0.997        | 0.985        | 1.009        | 1.039        | 1.020        | 0.990        | 1.060        | 1.036        | 0.976         | 1.012         | 0.991         | Q92905       | COPS5     | COP9 signalosome complex subunit 5                  |
| 0.994           | 0.983        | 1.018        | 1.004        | 0.998        | 0.965        | 0.985        | 1.047        | 1.029        | 0.957         | 1.031         | 0.987         | Q7L5N1       | COPS6     | COP9 signalosome complex subunit 6                  |
| 1.020           | 1.015        | 0.992        | 1.014        | 1.055        | 1.033        | 1.045        | 0.999        | 1.055        | 1.021         | 0.991         | 1.029         | Q9UBW8       | COPS7A    | COP9 signalosome complex subunit 7a                 |
| 0.974           | 0.942        | 1.048        | 0.994        | 0.942        | 1.062        | 1.069        | 0.987        | 0.977        | 1.009         | 0.964         | 1.071         | Q9H9Q2       | COPS7B    | COP9 signalosome complex subunit 7b                 |
| 1.019           | 1.012        | 0.998        | 0.986        | 0.949        | 0.991        | 1.006        | 1.067        | 1.016        | 0.983         | 1.019         | 0.973         | Q99627       | COPS8     | COP9 signalosome complex subunit 8                  |
| 1.309           | 0.980        | 1.183        | 1.367        | 1.177        | 0.986        | 0.859        | 1.007        | 1.159        | 1.018         | 0.830         | 0.967         | Q8WXC6       | COPS9     | COP9 signalosome complex subunit 9                  |
| 1.047           | 1.010        | 1.025        | 1.022        | 1.067        | 0.999        | 0.998        | 0.997        | 1.028        | 0.958         | 0.978         | 0.935         | B0QZ18       | CPNE1     | Copine-1                                            |
| 1.032           | 1.046        | 1.023        | 0.988        | 0.958        | 0.992        | 0.985        | 0.981        | 0.999        | 1.022         | 0.978         | 1.024         | Q96FN4       | CPNE2     | Copine-2                                            |
| 0.994           | 1.007        | 0.954        | 1.035        | 1.128        | 1.020        | 1.044        | 1.003        | 1.079        | 1.071         | 1.010         | 1.017         | O75131       | CPNE3     | Copine-3                                            |
| 1.000           | 1.009        | 1.002        | 0.998        | 0.958        | 0.981        | 1.006        | 1.028        | 0.973        | 1.025         | 1.029         | 1.042         | Q9UBL6       | CPNE7     | Copine-7                                            |
| 0.995           | 1.018        | 1.015        | 0.983        | 0.969        | 0.982        | 1.001        | 1.096        | 0.997        | 1.006         | 0.969         | 1.021         | Q86YQ8       | CPNE8     | Copine-8                                            |
| 0.988           | 0.985        | 1.017        | 1.041        | 1.004        | 1.082        | 1.007        | 1.041        | 1.024        | 0.995         | 0.980         | 1.017         | O14618       | CCS       | Copper chaperone for superoxide dismutase           |
| 1.029           | 0.910        | 1.058        | 0.991        | 0.934        | 1.035        | 0.938        | 1.035        | 0.992        | 0.955         | 0.991         | 1.026         | Q9NTM9       | CUTC      | Copper homeostasis protein cutC homolog             |
| 1.017           | 1.244        | 1.129        | 1.018        | 1.371        | 1.263        | 1.020        | 1.160        | 1.180        | 1.034         | 1.059         | 1.085         | E5RIM7       | ATOX1     | Copper transport protein ATOX1                      |
|                 |              |              |              |              |              |              |              |              | 0.974         | 0.959         | 1.179         | P35670       | ATP7B     | Copper-transporting ATPase 2                        |
| 1.095           | 1.075        | 0.934        | 1.017        | 1.014        | 0.931        | 0.882        | 1.154        | 1.137        | 0.942         | 1.031         | 0.911         | A0A0D9SG04   | COBLL1    | Cordon-bleu protein-like 1                          |
| 1.049           | 1.002        | 1.011        | 1.007        | 1.000        | 0.977        | 0.988        | 1.036        | 1.011        | 0.947         | 0.969         | 0.962         | O75367       | H2AFY     | Core histone macro-H2A.1                            |
|                 |              |              | 1.004        | 0.971        | 1.243        | 1.065        | 1.057        | 1.074        | 1.118         | 0.866         | 1.323         | Q9P0M6       | H2AFY2    | Core histone macro-H2A.2                            |
| 0.971           | 1.004        | 0.997        | 0.986        | 1.019        | 1.016        | 1.007        | 1.060        | 1.011        | 1.026         | 1.061         | 1.081         | Q13951       | CBFB      | Core-binding factor subunit beta                    |
| 0.852           | 0.984        | 1.282        | 0.964        | 0.989        | 1.078        | 0.931        | 0.731        | 0.952        | 1.011         | 0.982         | 1.110         | Q86X95       | CIR1      | Corepressor interacting with RBPJ 1                 |
| 1.026           | 1.047        | 1.066        | 1.009        | 1.090        | 0.971        | 1.050        | 1.142        | 0.924        | 1.188         | 1.119         | 1.109         | P31146       | CORO1A    | Coronin-1A                                          |
| 0.985           | 0.961        | 0.983        | 0.995        | 0.993        | 1.008        | 1.002        | 0.964        | 1.001        | 1.007         | 0.996         | 0.973         | Q9BR76       | CORO1B    | Coronin-1B                                          |
| 0.942           | 1.285        | 1.153        | 1.000        | 0.874        | 0.933        | 0.961        | 0.914        | 0.964        | 1.197         | 1.055         | 1.103         | Q92828       | CORO2A    | Coronin-2A                                          |
| 1.266           | 1.011        | 1.041        | 1.102        | 1.371        | 0.908        | 1.016        | 0.784        | 1.297        | 0.921         | 0.956         | 0.935         | Q9P1F3       | ABRACL    | Costars family protein ABRACL                       |
| 1.034           | 0.906        | 0.962        | 0.981        | 0.967        | 1.144        | 1.190        | 0.936        | 0.944        | 1.064         | 0.965         | 1.071         | P24468       | NR2F2     | COUP transcription factor 2                         |

| Abundance Ratio |              |              |              |              |              |              |              |              |               |               |               | Accession ID | Gene name | Protein Description                                         |
|-----------------|--------------|--------------|--------------|--------------|--------------|--------------|--------------|--------------|---------------|---------------|---------------|--------------|-----------|-------------------------------------------------------------|
| 1 d<br>M1/C1    | 1 d<br>M2/C2 | 1 d<br>M3/C3 | 4 d<br>M1/C1 | 4 d<br>M2/C2 | 4 d<br>M3/C3 | 7 d<br>M1/C1 | 7 d<br>M2/C2 | 7 d<br>M3/C3 | 10 d<br>M1/C1 | 10 d<br>M2/C2 | 10 d<br>M3/C3 |              |           |                                                             |
| 1.016           | 1.008        | 1.015        | 0.938        | 0.966        | 1.037        | 0.996        | 0.877        | 0.964        | 1.039         | 0.999         | 0.987         | Q9NRP2       | CMC2      | COX assembly mitochondrial protein 2 homolog                |
| 0.872           | 0.994        | 1.001        | 1.087        | 1.180        | 0.977        | 1.033        | 0.970        | 1.002        | 1.073         | 1.016         | 1.024         | H7C3D8       | CMC1      | COX assembly mitochondrial protein homolog<br>(Fragment)    |
| 1.076           | 0.914        | 1.008        | 1.012        | 0.927        | 1.006        | 1.029        | 0.962        | 1.007        | 1.165         | 0.940         | 1.162         | P78310       | CXADR     | Coxsackievirus and adenovirus receptor                      |
| 0.975           | 0.973        | 0.988        | 0.951        | 0.957        | 0.980        | 0.930        | 0.869        | 0.961        | 0.990         | 1.000         | 1.037         | Q9UEE9       | CFDP1     | Craniofacial development protein 1                          |
| 0.996           | 0.938        | 1.031        | 0.997        | 0.946        | 1.030        | 0.984        | 1.074        | 1.036        | 0.966         | 1.099         | 0.999         | P12277       | CKB       | Creatine kinase B-type                                      |
| 0.982           | 0.978        | 1.018        | 0.984        | 0.948        | 1.032        | 0.954        | 0.900        | 0.977        | 1.053         | 1.000         | 1.074         | Q92793       | CREBBP    | CREB-binding protein                                        |
| 1.220           | 0.880        | 0.974        |              |              |              | 0.723        | 0.945        | 1.104        |               |               |               | H0YDQ8       | CRTC2     | CREB-regulated transcription coactivator 2 (Fragment)       |
| 0.931           | 0.960        | 0.987        | 0.996        | 0.937        | 1.046        | 0.989        | 0.929        | 0.926        | 1.010         | 1.099         | 1.015         | Q53ET0       | CRTC2     | CREB-regulated transcription coactivator 2                  |
| 0.976           | 0.968        | 1.166        | 1.023        | 1.063        | 1.022        | 0.994        | 1.001        | 0.921        | 1.201         | 1.200         | 1.048         | Q6UUUV7      | CRTC3     | CREB-regulated transcription coactivator 3                  |
| 0.986           | 1.013        | 0.953        | 1.015        | 1.059        | 0.987        | 0.986        | 1.053        | 1.016        | 0.976         | 0.996         | 0.972         | P46109       | CRKL      | Crk-like protein                                            |
| 1.042           | 1.004        | 1.029        | 1.000        | 0.977        | 1.058        | 1.029        | 1.057        | 1.016        | 0.991         | 0.999         | 1.030         | Q9BZJ0       | CRNKL1    | Crooked neck-like protein 1                                 |
| 1.197           | 0.986        | 1.096        | 1.025        | 1.283        | 1.003        | 1.016        | 1.043        | 1.055        | 1.044         | 1.072         | 1.016         | O94886       | TMEM63A   | CSC1-like protein 1                                         |
| 1.034           | 0.990        | 0.978        | 1.049        | 0.972        | 0.864        | 1.029        | 1.066        | 0.958        | 1.040         | 1.078         | 0.950         | Q5T3F8       | TMEM63B   | CSC1-like protein 2                                         |
|                 |              |              |              |              |              |              |              |              | 0.990         | 1.022         | 0.966         | Q2NKK3       | CTC1      | CST complex subunit CTC1                                    |
| 1.067           | 0.991        | 1.046        | 0.992        | 0.932        | 1.113        | 1.089        | 1.079        | 1.024        | 1.093         | 1.166         | 1.166         | Q05D32       | CTDSPL2   | CTD small phosphatase-like protein 2                        |
| 0.811           | 0.987        | 1.018        | 1.000        | 0.929        | 1.013        | 0.869        | 0.977        | 1.116        | 0.772         | 0.992         | 1.344         | O15194       | CTDSPL    | CTD small phosphatase-like protein                          |
| 1.033           | 1.012        | 0.991        | 1.012        | 0.961        | 0.955        | 0.996        | 1.082        | 1.005        | 0.989         | 0.993         | 1.011         | Q13363       | CTBP1     | C-terminal-binding protein 1                                |
| 1.003           | 1.011        | 0.994        | 1.004        | 1.036        | 0.973        | 0.999        | 1.013        | 0.994        | 1.001         | 0.994         | 1.002         | P17812       | CTPS1     | CTP synthase 1                                              |
| 1.051           | 0.975        | 1.027        | 0.983        | 0.975        | 1.042        | 1.031        | 1.070        | 1.012        | 1.008         | 0.969         | 1.027         | Q9NRF8       | CTPS2     | CTP synthase 2                                              |
| 1.029           | 0.995        | 1.039        | 0.985        | 0.954        | 1.036        | 1.016        | 0.994        | 0.968        | 0.982         | 1.006         | 1.018         | Q9P2B4       | CTTNBP2NL | CTTNBP2 N-terminal-like protein                             |
|                 |              |              |              |              |              | 1.248        | 0.468        | 0.914        | 1.082         | 0.911         | 1.158         | Q9ULY5       | CLEC4E    | C-type lectin domain family 4 member E                      |
| 0.969           | 0.985        | 1.003        | 0.969        | 0.949        | 1.022        | 1.028        | 0.946        | 0.974        | 1.055         | 0.972         | 1.058         | Q9UBG0       | MRC2      | C-type mannose receptor 2                                   |
| 0.981           | 1.014        | 1.043        | 1.032        | 0.993        | 1.026        | 1.052        | 1.022        | 0.976        | 1.050         | 0.984         | 1.052         | Q9H5V8       | CDCP1     | CUB domain-containing protein 1                             |
| 1.031           | 1.068        | 1.140        | 0.882        | 0.995        | 1.071        | 0.974        | 0.959        | 1.048        | 1.045         | 1.130         | 1.316         | Q9NWM3       | CUEDC1    | CUE domain-containing protein 1                             |
| 1.059           | 1.070        | 1.102        |              |              |              |              |              |              |               |               |               | Q9H467       | CUEDC2    | CUE domain-containing protein 2                             |
| 0.937           | 1.006        | 1.016        | 1.005        | 1.084        | 1.025        | 0.995        | 0.911        | 1.001        | 0.964         | 1.065         | 0.987         | G5EA30       | CELF1     | CUG triplet repeat, RNA binding protein 1, isoform<br>CRA_c |
| 0.862           | 1.019        | 0.958        | 1.034        | 1.040        | 0.979        | 1.027        | 1.090        | 0.921        | 1.090         | 1.022         | 0.895         | E9PSH0       | CELF1     | CUGBP Elav-like family member 1 (Fragment)                  |
| 0.978           | 1.033        | 1.012        | 1.053        | 0.987        | 0.994        | 1.073        | 1.071        | 1.042        | 1.019         | 1.034         | 1.041         | A0A0J9YXJ0   | CELF2     | CUGBP Elav-like family member 2                             |
| 1.010           | 1.003        | 0.988        | 0.990        | 0.999        | 0.986        | 0.999        | 1.044        | 1.002        | 0.969         | 0.980         | 1.011         | Q13616       | CUL1      | Cullin-1                                                    |
| 1.009           | 0.991        | 1.006        | 0.995        | 1.018        | 1.029        | 0.990        | 1.010        | 1.001        | 0.993         | 0.973         | 1.026         | Q13618       | CUL3      | Cullin-3                                                    |
| 1.025           | 1.001        | 1.019        | 0.998        | 1.004        | 1.014        | 0.963        | 0.976        | 0.983        | 0.983         | 1.010         | 1.017         | Q13619       | CUL4A     | Cullin-4A                                                   |
| 0.994           | 0.986        | 1.024        | 1.019        | 1.068        | 1.018        | 0.995        | 0.962        | 1.031        | 0.994         | 1.007         | 1.020         | Q13620       | CUL4B     | Cullin-4B                                                   |

| Abundance Ratio |              |              |              |              |              |              |              |              |               |               |               | Accession ID | Gene name | Protein Description                             |
|-----------------|--------------|--------------|--------------|--------------|--------------|--------------|--------------|--------------|---------------|---------------|---------------|--------------|-----------|-------------------------------------------------|
| 1 d<br>M1/C1    | 1 d<br>M2/C2 | 1 d<br>M3/C3 | 4 d<br>M1/C1 | 4 d<br>M2/C2 | 4 d<br>M3/C3 | 7 d<br>M1/C1 | 7 d<br>M2/C2 | 7 d<br>M3/C3 | 10 d<br>M1/C1 | 10 d<br>M2/C2 | 10 d<br>M3/C3 |              |           |                                                 |
| 1.004           | 1.000        | 1.015        | 0.994        | 0.970        | 1.026        | 0.981        | 1.009        | 0.996        | 0.991         | 0.981         | 1.004         | Q93034       | CUL5      | Cullin-5                                        |
| 1.081           | 0.946        | 1.051        | 1.010        | 0.945        | 0.978        | 0.976        | 1.098        | 0.985        |               |               |               | Q8IWT3       | CUL9      | Cullin-9                                        |
| 0.988           | 0.999        | 0.995        | 0.999        | 1.024        | 1.000        | 0.993        | 1.015        | 1.024        | 0.974         | 0.986         | 0.983         | Q86VP6       | CAND1     | Cullin-associated NEDD8-dissociated protein 1   |
| 0.980           | 0.964        | 0.955        | 1.014        | 0.942        | 1.059        | 1.016        | 1.050        | 1.038        | 1.017         | 0.970         | 1.053         | O75155       | CAND2     | Cullin-associated NEDD8-dissociated protein 2   |
| 1.019           | 0.981        | 1.006        | 1.076        | 0.977        | 1.050        | 1.047        | 1.017        | 1.024        | 0.997         | 1.000         | 1.034         | Q69YN2       | CWF19L1   | CWF19-like protein 1                            |
| 1.025           | 1.032        | 1.004        | 1.077        | 1.107        | 1.140        | 1.062        | 0.953        | 0.904        | 1.151         | 0.894         | 1.119         | Q2TBE0       | CWF19L2   | CWF19-like protein 2                            |
| 0.999           | 0.907        | 1.072        | 0.960        | 1.014        | 1.025        | 1.071        | 0.794        | 0.888        | 1.082         | 1.050         | 1.018         | P56277       | CMC4      | Cx9C motif-containing protein 4                 |
|                 |              |              |              |              |              |              |              |              | 0.980         | 0.838         | 1.004         | P80162       | CXCL6     | C-X-C motif chemokine 6                         |
| 1.127           | 0.897        | 0.982        | 1.161        | 0.816        | 1.025        | 1.106        | 0.919        | 0.985        | 1.108         | 0.940         | 1.033         | P18846       | ATF1      | Cyclic AMP-dependent transcription factor ATF-1 |
| 0.982           | 1.003        | 1.044        | 1.008        | 0.852        | 0.967        | 0.945        | 1.146        | 0.952        | 1.046         | 0.976         | 1.035         | P15336       | ATF2      | Cyclic AMP-dependent transcription factor ATF-2 |
|                 |              |              |              |              |              | 1.057        | 1.236        | 0.948        | 1.088         | 0.926         | 0.836         | P18847       | ATF3      | Cyclic AMP-dependent transcription factor ATF-3 |
| 0.974           | 0.996        | 1.019        | 0.987        | 0.943        | 1.010        | 1.000        | 0.939        | 0.949        | 1.110         | 1.039         | 1.071         | P17544       | ATF7      | Cyclic AMP-dependent transcription factor ATF-7 |
| 0.978           | 0.997        | 1.066        | 0.919        | 0.962        | 0.998        | 0.915        | 0.976        | 1.082        | 0.964         | 1.034         | 1.080         | P16220       | CREB1     | Cyclic AMP-responsive element-binding protein 1 |
| 1.050           | 0.977        | 1.046        | 0.967        | 0.985        | 1.003        | 0.988        | 1.009        | 1.048        | 1.016         | 0.963         | 1.087         | Q8N884       | MB21D1    | Cyclic GMP-AMP synthase                         |
| 0.911           | 1.045        | 0.988        | 0.989        | 0.904        | 1.034        | 1.069        | 1.103        | 0.975        | 0.922         | 0.898         | 1.080         | P20248       | CCNA2     | Cyclin-A2                                       |
| 0.844           | 0.930        | 0.575        | 1.135        | 1.173        | 1.078        | 0.904        | 1.140        | 0.747        | 0.668         | 0.760         | 0.950         | P24863       | CCNC      | Cyclin-C                                        |
| 0.900           | 1.045        | 1.012        | 0.706        | 0.955        | 1.069        | 0.812        | 1.077        | 1.056        | 0.993         | 1.069         | 0.979         | O95273       | CCNDBP1   | Cyclin-D1-binding protein 1                     |
| 0.958           | 0.998        | 0.994        | 0.983        | 0.943        | 0.976        | 1.043        | 1.072        | 0.990        | 0.918         | 0.860         | 1.012         | P06493       | CDK1      | Cyclin-dependent kinase 1                       |
| 0.827           | 1.050        | 1.026        | 0.709        | 0.968        | 1.191        | 0.943        | 0.601        | 1.256        | 1.300         | 0.980         | 1.306         | Q15131       | CDK10     | Cyclin-dependent kinase 10                      |
| 1.100           | 1.096        | 0.948        | 1.047        | 0.957        | 0.870        | 0.846        | 1.102        | 0.947        | 0.990         | 0.884         | 1.049         | Q9UQ88       | CDK11A    | Cyclin-dependent kinase 11A                     |
|                 |              |              |              |              |              |              |              |              | 1.196         | 0.950         | 0.978         | A0A087X1I0   | CDK11B    | Cyclin-dependent kinase 11B                     |
| 0.995           | 0.999        | 0.997        | 0.983        | 0.954        | 1.016        | 1.037        | 1.034        | 0.990        | 1.028         | 0.988         | 1.013         | J3QR44       | CDK11B    | Cyclin-dependent kinase 11B                     |
| 1.011           | 1.021        | 1.000        | 1.007        | 0.947        | 1.026        | 1.031        | 1.053        | 0.976        | 1.009         | 1.008         | 1.030         | Q9NYV4       | CDK12     | Cyclin-dependent kinase 12                      |
| 1.049           | 1.036        | 1.020        | 1.040        | 0.941        | 1.173        | 0.710        | 0.796        | 1.256        |               |               |               | Q14004       | CDK13     | Cyclin-dependent kinase 13                      |
| 1.013           | 0.992        | 1.029        | 1.010        | 0.932        | 1.098        | 1.066        | 1.048        | 0.995        | 1.073         | 1.018         | 1.097         | Q00537       | CDK17     | Cyclin-dependent kinase 17                      |
| 0.966           | 1.055        | 1.066        | 0.970        | 0.932        | 1.018        | 0.896        | 1.124        | 1.055        | 0.932         | 1.044         | 1.017         | Q9BWU1       | CDK19     | Cyclin-dependent kinase 19                      |
| 0.964           | 1.003        | 0.963        | 1.014        | 0.926        | 0.995        | 1.015        | 1.076        | 0.979        | 0.954         | 0.935         | 0.967         | G3V5T9       | CDK2      | Cyclin-dependent kinase 2                       |
| 1.016           | 0.992        | 1.033        | 0.993        | 1.018        | 1.049        | 1.106        | 1.075        | 1.065        | 1.120         | 1.042         | 1.082         | O14519       | CDK2AP1   | Cyclin-dependent kinase 2-associated protein 1  |
| 1.008           | 0.952        | 1.000        | 1.001        | 0.978        | 1.016        | 0.975        | 1.048        | 1.113        | 0.979         | 0.994         | 0.974         | P42773       | CDKN2C    | Cyclin-dependent kinase 4 inhibitor C           |
| 1.013           | 1.026        | 1.032        | 1.049        | 1.037        | 1.045        | 0.991        | 1.016        | 0.967        | 1.061         | 0.968         | 1.026         | P11802       | CDK4      | Cyclin-dependent kinase 4                       |
| 1.080           | 0.983        | 1.034        | 1.033        | 1.047        | 1.017        | 0.969        | 1.022        | 1.055        | 0.942         | 0.997         | 1.046         | Q00534       | CDK6      | Cyclin-dependent kinase 6                       |
| 1.017           | 0.956        | 1.021        | 0.998        | 0.995        | 1.021        | 1.037        | 1.067        | 1.020        | 0.992         | 0.944         | 0.976         | P50613       | CDK7      | Cyclin-dependent kinase 7                       |
| 1.025           | 1.122        | 1.084        | 0.949        | 0.913        | 1.011        |              |              |              | 1.103         | 0.906         | 0.981         | P49336       | CDK8      | Cyclin-dependent kinase 8                       |
|                 |              |              |              |              |              | 1.087        | 0.798        | 0.941        | 1.138         | 0.972         | 1.243         | P38936       | CDKN1A    | Cyclin-dependent kinase inhibitor 1             |

| Abundance Ratio |              |              |              |              |              |              |              |              |               |               |               | Accession ID | Gene name | Protein Description                                                                                               |
|-----------------|--------------|--------------|--------------|--------------|--------------|--------------|--------------|--------------|---------------|---------------|---------------|--------------|-----------|-------------------------------------------------------------------------------------------------------------------|
| 1 d<br>M1/C1    | 1 d<br>M2/C2 | 1 d<br>M3/C3 | 4 d<br>M1/C1 | 4 d<br>M2/C2 | 4 d<br>M3/C3 | 7 d<br>M1/C1 | 7 d<br>M2/C2 | 7 d<br>M3/C3 | 10 d<br>M1/C1 | 10 d<br>M2/C2 | 10 d<br>M3/C3 |              |           |                                                                                                                   |
| 1.091           | 0.968        | 1.076        | 1.077        | 1.055        | 1.064        | 0.958        | 0.883        | 0.921        | 1.111         | 1.008         | 1.182         | P46527       | CDKN1B    | Cyclin-dependent kinase inhibitor 1B                                                                              |
| 1.006           | 1.037        | 0.951        | 0.944        | 0.980        | 0.876        | 1.071        | 1.057        | 0.908        | 1.037         | 0.830         | 1.101         | P61024       | CKS1B     | Cyclin-dependent kinases regulatory subunit 1                                                                     |
| 1.057           | 0.986        | 1.139        | 0.995        | 0.954        | 1.003        | 1.006        | 1.062        | 0.993        | 0.914         | 0.907         | 1.154         | P33552       | CKS2      | Cyclin-dependent kinases regulatory subunit 2                                                                     |
| 1.000           | 1.026        | 0.992        | 0.994        | 0.988        | 0.998        | 0.947        | 1.012        | 0.996        | 0.961         | 0.974         | 0.951         | Q00535       | CDK5      | Cyclin-dependent-like kinase 5                                                                                    |
| 1.019           | 1.001        | 1.052        | 1.000        | 0.949        | 1.090        | 1.005        | 1.024        | 1.040        | 1.054         | 1.012         | 1.091         | O14976       | GAK       | Cyclin-G-associated kinase                                                                                        |
| 0.994           | 0.970        | 0.948        | 1.137        | 1.006        | 1.023        | 1.091        | 0.977        | 1.010        | 0.974         | 0.940         | 1.001         | P51946       | CCNH      | Cyclin-H                                                                                                          |
| 1.088           | 1.032        | 1.028        | 1.023        | 0.972        | 0.969        | 0.982        | 0.966        | 0.983        | 0.938         | 1.041         | 0.979         | Q9UK58       | CCNL1     | Cyclin-L1                                                                                                         |
| 0.962           | 0.955        | 1.163        | 0.979        | 0.878        | 1.001        | 0.925        | 1.587        | 1.462        | 0.945         | 1.027         | 1.074         | Q96S94       | CCNL2     | Cyclin-L2                                                                                                         |
| 1.074           | 0.878        | 0.915        |              |              |              | 0.789        | 0.635        | 0.984        | 0.897         | 0.903         | 1.052         | Q8N1B3       | FAM58A    | Cyclin-related protein FAM58A                                                                                     |
| 1.024           | 1.016        | 1.015        | 0.986        | 0.991        | 1.033        | 1.032        | 0.939        | 0.977        | 1.064         | 1.059         | 1.051         | O60563       | CCNT1     | Cyclin-T1                                                                                                         |
| 1.000           | 0.988        | 1.015        | 0.928        | 0.926        | 0.912        | 0.912        | 1.048        | 1.017        | 0.835         | 1.011         | 0.836         | Q8ND76       | CCNY      | Cyclin-Y                                                                                                          |
| 1.041           | 1.038        | 1.024        | 0.959        | 0.963        | 1.104        | 1.062        | 1.095        | 1.032        | 1.103         | 1.044         | 1.029         | Q8N7R7       | CCNYL1    | Cyclin-Y-like protein 1                                                                                           |
| 1.018           | 0.934        | 1.042        | 0.985        | 0.919        | 0.976        | 0.974        | 1.095        | 1.061        | 1.040         | 1.014         | 1.074         | P32929       | CTH       | Cystathionine gamma-lyase                                                                                         |
|                 |              |              |              |              |              | 0.968        | 1.118        | 0.933        | 0.972         | 1.030         | 0.739         | P01040       | CSTA      | Cystatin-A                                                                                                        |
| 1.073           | 1.017        | 0.974        | 1.114        | 0.987        | 0.920        | 1.016        | 1.042        | 0.929        | 1.086         | 0.948         | 0.881         | P04080       | CSTB      | Cystatin-B                                                                                                        |
| 1.021           | 0.985        | 1.024        | 0.857        | 0.910        | 1.038        | 1.052        | 1.088        | 1.021        | 1.029         | 1.048         | 1.190         | P01034       | CST3      | Cystatin-C                                                                                                        |
| 1.093           | 1.033        | 0.961        | 1.032        | 1.325        | 0.912        | 1.110        | 0.870        | 0.975        | 1.026         | 1.011         | 1.003         | P21291       | CSRP1     | Cysteine and glycine-rich protein 1                                                                               |
| 1.016           | 0.958        | 1.018        | 0.981        | 1.037        | 0.975        | 1.019        | 0.889        | 0.961        | 0.980         | 0.982         | 0.976         | Q16527       | CSRP2     | Cysteine and glycine-rich protein 2                                                                               |
| 0.971           | 0.996        | 1.018        | 0.995        | 1.104        | 0.953        | 0.960        | 0.877        | 0.986        | 0.944         | 0.998         | 0.979         | Q9UHD1       | CHORDC1   | Cysteine and histidine-rich domain-containing protein 1                                                           |
| 1.032           | 0.966        | 1.026        | 0.970        | 0.980        | 1.022        | 0.994        | 1.032        | 1.010        | 0.995         | 1.018         | 1.015         | E9PJD7       | CYHR1     | Cysteine and histidine-rich protein 1                                                                             |
| 1.018           | 0.928        | 1.044        | 0.995        | 0.965        | 0.995        | 1.024        | 1.101        | 1.079        | 0.965         | 0.989         | 0.986         | B7Z4W5       | KYAT1     | Cysteine conjugate-beta lyase cytoplasmic (Glutamine transaminase K, kyneurenine aminotransferase), isoform CRA b |
| 0.957           | 1.001        | 0.986        | 0.966        | 0.947        | 0.987        | 1.019        | 1.045        | 1.041        | 1.055         | 1.040         | 1.064         | Q9Y697       | NFS1      | Cysteine desulfurase, mitochondrial                                                                               |
|                 |              |              |              |              |              |              |              |              | 0.980         | 0.658         | 0.916         | Q8WYN0       | ATG4A     | Cysteine protease ATG4A                                                                                           |
| 1.173           | 1.066        | 1.095        | 1.051        | 1.107        | 0.968        | 0.952        | 1.254        | 0.986        | 0.971         | 0.853         | 1.164         | Q96DT6       | ATG4C     | Cysteine protease ATG4C                                                                                           |
| 1.058           | 1.120        | 1.119        | 0.916        | 0.895        | 1.203        | 1.233        | 0.983        | 0.904        | 1.323         | 0.983         | 1.185         | Q9H1C7       | CYSTM1    | Cysteine-rich and transmembrane domain-containing protein 1                                                       |
|                 |              |              | 1.097        | 1.013        | 1.047        |              |              |              | 0.975         | 1.069         | 0.997         | Q9NZV1       | CRIM1     | Cysteine-rich motor neuron 1 protein                                                                              |
| 0.871           | 0.984        | 0.870        | 0.992        | 0.943        | 0.921        | 1.110        | 1.041        | 0.953        | 1.048         | 1.023         | 0.949         | Q9P021       | CRIP1     | Cysteine-rich PDZ-binding protein                                                                                 |
| 1.153           | 1.024        | 1.025        | 1.053        | 1.457        | 0.976        | 1.022        | 0.802        | 1.020        | 0.987         | 0.914         | 0.926         | P50238       | CRIP1     | Cysteine-rich protein 1                                                                                           |
| 1.001           | 0.981        | 0.962        | 0.988        | 0.989        | 0.896        | 0.961        | 0.993        | 0.907        | 0.966         | 1.024         | 0.984         | P52943       | CRIP2     | Cysteine-rich protein 2                                                                                           |
| 0.929           | 1.028        | 1.068        | 0.991        | 0.967        | 1.075        | 1.001        | 1.039        | 0.977        | 1.103         | 1.085         | 1.046         | Q96HD1       | CRELD1    | Cysteine-rich with EGF-like domain protein 1                                                                      |
| 1.028           | 0.986        | 0.982        |              |              |              | 1.159        | 1.009        | 0.754        |               |               |               | Q9UPY5       | SLC7A11   | Cystine/glutamate transporter                                                                                     |

| Abundance Ratio |              |              |              |              |              |              |              |              |               |               |               | Accession ID | Gene name | Protein Description                                           |
|-----------------|--------------|--------------|--------------|--------------|--------------|--------------|--------------|--------------|---------------|---------------|---------------|--------------|-----------|---------------------------------------------------------------|
| 1 d<br>M1/C1    | 1 d<br>M2/C2 | 1 d<br>M3/C3 | 4 d<br>M1/C1 | 4 d<br>M2/C2 | 4 d<br>M3/C3 | 7 d<br>M1/C1 | 7 d<br>M2/C2 | 7 d<br>M3/C3 | 10 d<br>M1/C1 | 10 d<br>M2/C2 | 10 d<br>M3/C3 |              |           |                                                               |
| 0.913           | 0.974        | 0.740        | 0.878        | 0.825        | 1.180        | 1.085        | 1.092        | 0.993        |               |               |               | P00156       | MT-CYB    | Cytochrome b                                                  |
| 1.002           | 1.038        | 1.054        | 0.953        | 0.860        | 0.921        | 1.082        | 0.990        | 0.960        | 1.141         | 0.972         | 1.148         | P13498       | CYBA      | Cytochrome b-245 light chain                                  |
| 0.981           | 0.989        | 1.019        | 0.987        | 0.949        | 0.977        | 1.016        | 1.009        | 0.967        | 1.058         | 0.935         | 1.075         | P00167       | CYB5A     | Cytochrome b5                                                 |
| 0.991           | 1.007        | 1.073        | 0.960        | 0.958        | 1.108        | 1.081        | 1.132        | 0.986        | 0.998         | 1.003         | 1.138         | Q7L1T6       | CYB5R4    | Cytochrome b5 reductase 4                                     |
| 0.935           | 0.989        | 1.013        | 0.950        | 0.889        | 0.917        | 0.992        | 1.043        | 0.984        | 1.076         | 1.019         | 1.087         | J3KNF8       | CYB5B     | Cytochrome b5 type B                                          |
| 1.003           | 0.999        | 0.987        | 0.991        | 1.028        | 0.975        | 1.011        | 1.004        | 1.012        | 1.027         | 1.019         | 1.018         | P31930       | UQCRC1    | Cytochrome b-c1 complex subunit 1, mitochondrial              |
| 0.962           | 0.945        | 0.925        | 1.179        | 1.328        | 0.847        | 0.995        | 1.013        | 1.079        |               |               |               | O14957       | UQCR11    | Cytochrome b-c1 complex subunit 10                            |
| 1.015           | 0.999        | 1.006        | 0.983        | 0.977        | 0.979        | 0.987        | 1.006        | 0.996        | 1.025         | 1.012         | 0.984         | P22695       | UQCRC2    | Cytochrome b-c1 complex subunit 2, mitochondrial              |
| 1.674           | 0.982        | 1.184        | 1.077        | 2.108        | 1.000        | 1.123        | 0.523        | 1.205        | 1.076         | 0.994         | 1.088         | P07919       | UQCRH     | Cytochrome b-c1 complex subunit 6, mitochondrial              |
| 0.995           | 0.984        | 0.969        | 0.981        | 0.980        | 0.956        | 0.957        | 0.861        | 0.971        | 1.041         | 1.019         | 0.975         | P14927       | UQCRB     | Cytochrome b-c1 complex subunit 7                             |
| 0.943           | 1.007        | 0.987        | 1.008        | 0.961        | 1.009        | 0.997        | 0.965        | 0.971        | 1.144         | 1.040         | 1.043         | O14949       | UQCRQ     | Cytochrome b-c1 complex subunit 8                             |
| 0.979           | 1.032        | 0.925        | 0.997        | 1.096        | 1.132        | 1.070        | 1.063        | 1.072        | 1.336         | 1.041         | 1.080         | Q9UDW1       | UQCR10    | Cytochrome b-c1 complex subunit 9                             |
| 0.981           | 1.022        | 1.018        | 0.997        | 0.994        | 1.015        | 0.989        | 1.049        | 1.015        | 1.030         | 1.033         | 1.040         | P47985       | UQCRFS1   | Cytochrome b-c1 complex subunit Rieske, mitochondrial         |
| 0.905           | 1.086        | 0.989        | 1.016        | 1.044        | 1.020        | 1.025        | 1.031        | 0.967        | 1.004         | 0.971         | 0.958         | P99999       | CYCS      | Cytochrome c                                                  |
| 1.053           | 0.968        | 0.992        | 1.032        | 0.948        | 1.097        | 1.083        | 0.984        | 1.018        | 1.055         | 1.016         | 1.056         | Q9GZY4       | COA1      | Cytochrome c oxidase assembly factor 1 homolog                |
| 0.863           | 0.983        | 0.972        | 0.933        | 1.085        | 1.028        | 0.993        | 0.875        | 0.991        | 1.073         | 0.998         | 1.052         | Q9Y2R0       | COA3      | Cytochrome c oxidase assembly factor 3 homolog, mitochondrial |
| 1.003           | 1.062        | 1.118        | 0.925        | 1.185        | 1.102        | 1.019        | 0.783        | 0.817        | 1.033         | 1.120         | 0.960         | Q86WW8       | COA5      | Cytochrome c oxidase assembly factor 5                        |
| 0.990           | 1.000        | 0.937        | 1.013        | 0.979        | 1.034        | 1.005        | 0.995        | 1.005        | 1.036         | 0.989         | 0.998         | Q96BR5       | COA7      | Cytochrome c oxidase assembly factor 7                        |
| 1.096           | 1.106        | 1.008        | 1.008        | 1.124        | 0.990        | 1.063        | 1.194        | 1.008        | 1.044         | 1.106         | 0.981         | Q9Y6N1       | COX11     | Cytochrome c oxidase assembly protein COX11, mitochondrial    |
| 1.014           | 1.037        | 1.003        | 0.991        | 0.945        | 0.978        | 0.977        | 1.029        | 1.013        | 1.039         | 0.859         | 1.007         | Q96I36       | COX14     | Cytochrome c oxidase assembly protein COX14                   |
| 0.974           | 1.010        | 1.005        | 1.153        | 0.806        | 0.926        | 0.985        | 0.992        | 1.065        | 1.090         | 0.928         | 1.013         | Q7KZN9       | COX15     | Cytochrome c oxidase assembly protein COX15 homolog           |
| 0.917           | 0.929        | 0.895        | 1.012        | 0.885        | 1.010        | 0.970        | 1.011        | 1.044        | 1.098         | 0.964         | 1.072         | Q49B96       | COX19     | Cytochrome c oxidase assembly protein COX19                   |
|                 |              |              |              |              |              | 1.280        | 0.757        | 1.021        | 1.019         | 1.000         | 0.926         | Q14061       | COX17     | Cytochrome c oxidase copper chaperone                         |
| 0.987           | 0.986        | 1.008        | 1.003        | 0.806        | 1.023        | 0.953        | 1.163        | 0.866        | 0.962         | 0.911         | 1.017         | P00395       | MT-CO1    | Cytochrome c oxidase subunit 1                                |
| 0.903           | 0.965        | 0.976        | 0.971        | 0.837        | 1.024        | 1.024        | 1.028        | 1.045        | 1.012         | 0.985         | 0.971         | P00403       | MT-CO2    | Cytochrome c oxidase subunit 2                                |
| 0.942           | 1.005        | 0.985        | 0.981        | 1.006        | 0.989        | 0.986        | 0.913        | 0.968        | 1.033         | 1.010         | 1.011         | P13073       | COX4I1    | Cytochrome c oxidase subunit 4 isoform 1, mitochondrial       |
| 1.040           | 0.993        | 0.980        | 1.017        | 1.010        | 0.973        | 1.030        | 1.084        | 1.008        | 1.007         | 1.005         | 0.955         | P20674       | COX5A     | Cytochrome c oxidase subunit 5A, mitochondrial                |
| 1.032           | 0.994        | 0.980        | 0.996        | 1.032        | 0.950        | 1.014        | 0.927        | 0.975        | 1.053         | 1.032         | 1.037         | P10606       | COX5B     | Cytochrome c oxidase subunit 5B, mitochondrial                |



| Abundance Ratio |              |              |              |              |              |              |              |              |               |               |               | Accession ID | Gene name | Protein Description                                            |
|-----------------|--------------|--------------|--------------|--------------|--------------|--------------|--------------|--------------|---------------|---------------|---------------|--------------|-----------|----------------------------------------------------------------|
| 1 d<br>M1/C1    | 1 d<br>M2/C2 | 1 d<br>M3/C3 | 4 d<br>M1/C1 | 4 d<br>M2/C2 | 4 d<br>M3/C3 | 7 d<br>M1/C1 | 7 d<br>M2/C2 | 7 d<br>M3/C3 | 10 d<br>M1/C1 | 10 d<br>M2/C2 | 10 d<br>M3/C3 |              |           |                                                                |
| 1.055           | 1.045        | 0.993        | 0.978        | 0.948        | 0.882        | 0.982        | 1.157        | 1.004        | 0.918         | 1.085         | 0.936         | P12074       | COX6A1    | Cytochrome c oxidase subunit 6A1, mitochondrial                |
| 1.028           | 0.989        | 1.031        | 0.979        | 1.054        | 1.018        | 1.078        | 0.929        | 1.029        | 1.026         | 1.014         | 1.006         | P14854       | COX6B1    | Cytochrome c oxidase subunit 6B1                               |
| 1.032           | 0.965        | 0.963        | 0.990        | 1.080        | 0.953        | 0.867        | 0.890        | 0.957        | 0.990         | 0.946         | 0.915         | P09669       | COX6C     | Cytochrome c oxidase subunit 6C                                |
| 1.032           | 1.000        | 1.007        | 0.983        | 1.145        | 1.034        | 1.027        | 1.003        | 1.042        | 1.046         | 1.010         | 0.991         | H0UI06       | COX7A2    | Cytochrome c oxidase subunit 7A2, mitochondrial                |
| 1.024           | 1.002        | 0.949        | 0.977        | 0.957        | 0.951        | 0.996        | 1.004        | 0.946        | 1.023         | 1.018         | 0.944         | O14548       | COX7A2L   | Cytochrome c oxidase subunit 7A-related protein, mitochondrial |
| 0.939           | 0.974        | 0.992        | 0.977        | 1.001        | 1.027        | 1.012        | 0.883        | 0.982        | 1.175         | 1.061         | 1.114         | P24311       | COX7B     | Cytochrome c oxidase subunit 7B, mitochondrial                 |
| 0.902           | 0.961        | 0.995        | 0.963        | 0.981        | 1.046        | 1.021        | 0.904        | 0.947        | 0.867         | 0.969         | 1.132         | P15954       | COX7C     | Cytochrome c oxidase subunit 7C, mitochondrial                 |
| 1.005           | 0.983        | 1.026        | 1.016        | 1.135        | 0.989        | 1.136        | 0.973        | 1.020        | 1.170         | 1.121         | 1.086         | O00483       | NDUFA4    | Cytochrome c oxidase subunit NDUFA4                            |
| 1.015           | 1.011        | 1.017        | 1.021        | 1.149        | 1.005        | 1.037        | 1.029        | 1.060        | 1.053         | 0.984         | 1.057         | P08574       | CYC1      | Cytochrome c1, heme protein, mitochondrial                     |
| 1.017           | 0.985        | 1.032        | 1.034        | 0.977        | 1.052        | 1.116        | 0.983        | 1.001        | 1.108         | 1.029         | 1.091         | P53701       | HCCS      | Cytochrome c-type heme lyase                                   |
| 0.973           | 0.973        | 1.019        | 0.984        | 0.888        | 1.044        | 0.989        | 0.977        | 1.021        | 1.006         | 1.045         | 1.061         | E9PHG5       | CYP20A1   | Cytochrome P450 20A1                                           |
| 1.120           | 0.940        | 1.207        | 0.982        | 0.992        | 1.107        | 0.867        | 1.033        | 1.136        | 0.958         | 0.905         | 1.058         | Q15438       | CYTH1     | Cytohesin-1                                                    |
|                 |              |              |              |              |              | 0.976        | 1.187        | 1.106        |               |               |               | A0A0D9SFG6   | CYTH2     | Cytohesin-2                                                    |
| 0.992           | 0.956        | 1.089        | 1.005        | 0.933        | 1.020        | 1.043        | 1.112        | 1.080        | 1.025         | 0.969         | 1.063         | O43739       | CYTH3     | Cytohesin-3                                                    |
| 0.966           | 1.060        | 0.977        | 1.025        | 0.957        | 1.026        | 1.040        | 0.979        | 0.956        | 1.030         | 1.041         | 1.009         | Q8IUI8       | CRLF3     | Cytokine receptor-like factor 3                                |
| 1.002           | 1.026        | 1.021        | 1.031        | 1.054        | 1.031        | 1.045        | 1.004        | 1.057        | 1.039         | 0.994         | 1.059         | P21399       | ACO1      | Cytoplasmic aconitate hydratase                                |
| 0.985           | 0.995        | 1.011        | 0.998        | 0.976        | 1.007        | 0.992        | 1.037        | 1.014        | 0.956         | 0.988         | 0.976         | Q14204       | DYNC1H1   | Cytoplasmic dynein 1 heavy chain 1                             |
| 1.011           | 1.018        | 0.989        | 1.000        | 1.036        | 0.989        | 1.012        | 1.055        | 1.018        | 0.988         | 0.986         | 0.995         | Q9Y6G9       | DYNC1LI1  | Cytoplasmic dynein 1 light intermediate chain 1                |
| 0.987           | 0.989        | 1.005        | 0.983        | 1.000        | 0.989        | 0.994        | 0.976        | 1.007        | 0.988         | 0.998         | 0.996         | O43237       | DYNC1LI2  | Cytoplasmic dynein 1 light intermediate chain 2                |
| 1.035           | 0.984        | 1.017        | 0.979        | 0.944        | 0.982        | 1.004        | 0.941        | 0.980        | 1.012         | 0.915         | 0.970         | Q8TCX1       | DYNC2LI1  | Cytoplasmic dynein 2 light intermediate chain 1                |
| 0.985           | 0.998        | 1.001        | 0.990        | 0.974        | 1.017        | 0.969        | 1.065        | 1.024        | 0.958         | 1.012         | 0.979         | Q7L576       | CYFIP1    | Cytoplasmic FMR1-interacting protein 1                         |
| 1.014           | 1.046        | 1.062        | 0.929        | 1.002        | 1.015        | 0.971        | 1.070        | 1.027        | 0.976         | 0.959         | 1.095         | Q9UKF7       | PITPNC1   | Cytoplasmic phosphatidylinositol transfer protein 1            |
| 0.918           | 1.173        | 0.962        | 0.862        | 0.838        | 1.155        | 0.989        | 1.456        | 0.995        |               |               |               | Q17RY0       | CPEB4     | Cytoplasmic polyadenylation element-binding protein 4          |
| 0.994           | 1.030        | 0.973        | 1.006        | 1.046        | 0.975        | 1.025        | 1.062        | 1.027        | 1.007         | 0.967         | 1.007         | P16333       | NCK1      | Cytoplasmic protein NCK1                                       |
| 1.025           | 0.998        | 0.978        | 1.020        | 0.984        | 1.019        | 1.044        | 1.039        | 1.089        | 1.027         | 0.990         | 1.052         | O43639       | NCK2      | Cytoplasmic protein NCK2                                       |
| 1.020           | 1.033        | 1.104        | 0.980        | 0.901        | 1.064        | 0.975        | 1.009        | 1.015        | 1.044         | 1.052         | 1.087         | Q7Z7A3       | CTU1      | Cytoplasmic tRNA 2-thiolation protein 1                        |
| 0.968           | 0.981        | 0.993        | 1.052        | 0.962        | 1.057        | 1.000        | 1.005        | 1.043        | 1.043         | 1.021         | 1.059         | H3BSW6       | CTU2      | Cytoplasmic tRNA 2-thiolation protein 2                        |
| 0.956           | 1.057        | 1.024        | 0.987        | 0.907        | 0.997        | 0.947        | 1.172        | 0.914        | 0.867         | 0.954         | 0.921         | Q8WWK9       | CKAP2     | Cytoskeleton-associated protein 2                              |
| 1.047           | 1.018        | 0.985        |              |              |              |              |              |              |               |               |               | Q8IYA6       | CKAP2L    | Cytoskeleton-associated protein 2-like                         |
| 0.966           | 0.977        | 1.013        | 0.992        | 0.936        | 1.011        | 0.993        | 0.987        | 0.983        | 0.996         | 0.994         | 1.026         | Q07065       | CKAP4     | Cytoskeleton-associated protein 4                              |
| 0.971           | 0.989        | 1.008        | 0.979        | 0.955        | 0.993        | 0.977        | 1.036        | 1.008        | 0.954         | 0.953         | 0.991         | Q14008       | CKAP5     | Cytoskeleton-associated protein 5                              |

| Abundance Ratio |              |              |              |              |              |              |              |              |               |               |               | Accession ID | Gene name | Protein Description                                 |
|-----------------|--------------|--------------|--------------|--------------|--------------|--------------|--------------|--------------|---------------|---------------|---------------|--------------|-----------|-----------------------------------------------------|
| 1 d<br>M1/C1    | 1 d<br>M2/C2 | 1 d<br>M3/C3 | 4 d<br>M1/C1 | 4 d<br>M2/C2 | 4 d<br>M3/C3 | 7 d<br>M1/C1 | 7 d<br>M2/C2 | 7 d<br>M3/C3 | 10 d<br>M1/C1 | 10 d<br>M2/C2 | 10 d<br>M3/C3 |              |           |                                                     |
| 1.009           | 0.996        | 1.004        | 1.004        | 1.064        | 0.974        | 1.003        | 0.985        | 1.009        | 1.007         | 0.991         | 1.023         | P28838       | LAP3      | Cytosol aminopeptidase                              |
| 0.986           | 1.001        | 0.980        | 0.995        | 0.957        | 1.005        | 0.973        | 1.057        | 1.057        | 0.991         | 0.957         | 1.031         | Q9H0P0       | NT5C3A    | Cytosolic 5'-nucleotidase 3A                        |
| 0.964           | 0.992        | 1.003        | 0.978        | 0.990        | 0.965        | 0.961        | 0.953        | 0.963        | 0.976         | 0.987         | 1.012         | O00154       | ACOT7     | Cytosolic acyl coenzyme A thioester hydrolase       |
|                 |              |              | 0.933        | 0.974        | 1.039        | 1.060        | 1.161        | 1.130        | 0.896         | 1.015         | 0.937         | Q8WTX7       | CASTOR1   | Cytosolic arginine sensor for mTORC1 subunit 1      |
| 1.099           | 1.001        | 1.001        | 1.017        | 0.993        | 0.971        | 0.974        | 1.081        | 1.037        | 1.005         | 1.043         | 1.041         | A6NHX0       | CASTOR2   | Cytosolic arginine sensor for mTORC1 subunit 2      |
| 1.085           | 1.024        | 1.176        | 1.017        | 1.119        | 1.144        | 1.099        | 0.707        | 0.837        |               |               |               | J3KNS1       | AGTPBP1   | Cytosolic carboxypeptidase 1                        |
| 1.040           | 0.965        | 1.023        | 0.991        | 0.931        | 1.059        | 0.995        | 1.123        | 1.022        | 0.991         | 1.007         | 1.061         | Q8NFI3       | ENGASE    | Cytosolic endo-beta-N-acetylglucosaminidase         |
| 1.097           | 1.096        | 1.023        | 1.073        | 1.008        | 0.967        | 1.074        | 1.156        | 0.993        | 1.113         | 1.038         | 1.112         | Q9H6Q4       | NARFL     | Cytosolic Fe-S cluster assembly factor NARFL        |
| 1.204           | 0.947        | 1.028        | 0.964        | 0.933        | 0.938        | 1.054        | 0.956        | 1.000        | 0.950         | 0.943         | 1.002         | P53384       | NUBP1     | Cytosolic Fe-S cluster assembly factor NUBP1        |
| 0.987           | 0.994        | 1.019        | 0.975        | 0.929        | 0.979        | 0.951        | 1.088        | 1.009        | 0.961         | 0.984         | 1.026         | Q9Y5Y2       | NUBP2     | Cytosolic Fe-S cluster assembly factor NUBP2        |
| 0.987           | 0.994        | 0.997        | 0.998        | 1.012        | 1.002        | 0.980        | 1.032        | 1.025        | 0.984         | 1.016         | 0.969         | Q96KP4       | CNDP2     | Cytosolic non-specific dipeptidase                  |
|                 |              |              |              |              |              | 1.082        | 1.072        | 1.161        |               |               |               | P47712       | PLA2G4A   | Cytosolic phospholipase A2                          |
| 0.989           | 1.008        | 1.020        | 0.998        | 0.998        | 1.038        | 0.984        | 1.095        | 1.013        | 0.991         | 0.958         | 0.989         | P49902       | NT5C2     | Cytosolic purine 5'-nucleotidase                    |
| 1.000           | 1.008        | 1.026        | 0.969        | 0.941        | 0.989        | 1.049        | 0.970        | 1.016        | 1.086         | 0.973         | 1.131         | Q69YQ0       | SPECC1L   | Cytospin-A                                          |
| 0.912           | 0.957        | 1.053        | 0.956        | 0.964        | 1.052        | 1.004        | 0.948        | 0.996        | 1.029         | 0.908         | 1.087         | Q5M775       | SPECC1    | Cytospin-B                                          |
| 0.933           | 1.051        | 1.029        | 1.000        | 0.954        | 1.009        | 1.029        | 1.013        | 1.024        | 1.084         | 1.008         | 1.009         | Q8N465       | D2HGDH    | D-2-hydroxyglutarate dehydrogenase, mitochondrial   |
| 0.930           | 1.005        | 0.965        | 0.993        | 1.008        | 0.996        | 0.990        | 1.015        | 1.013        | 0.920         | 0.962         | 0.981         | O43175       | PHGDH     | D-3-phosphoglycerate dehydrogenase                  |
| 0.900           | 0.867        | 0.973        | 0.998        | 0.872        | 0.995        | 0.916        | 1.095        | 1.174        | 0.932         | 0.967         | 1.095         | Q5D0E6       | DALRD3    | DALR anticodon-binding domain-containing protein 3  |
| 0.961           | 0.989        | 0.990        | 0.994        | 1.001        | 0.990        | 1.005        | 1.049        | 1.027        | 0.916         | 0.976         | 0.935         | Q96EP5       | DAZAP1    | DAZ-associated protein 1                            |
| 0.936           | 0.957        | 0.990        | 0.970        | 0.953        | 0.947        | 0.976        | 1.072        | 0.978        | 1.021         | 0.917         | 1.046         | Q02338       | BDH1      | D-beta-hydroxybutyrate dehydrogenase, mitochondrial |
| 0.972           | 1.005        | 0.979        | 1.028        | 1.039        | 0.951        | 1.021        | 0.976        | 0.966        | 0.935         | 1.001         | 0.969         | Q5BKZ1       | ZNF326    | DBIRD complex subunit ZNF326                        |
| 1.001           | 0.974        | 1.034        | 1.018        | 1.008        | 0.992        | 1.026        | 1.025        | 1.028        | 0.996         | 1.024         | 0.997         | Q9UKG1       | APPL1     | DCC-interacting protein 13-alpha                    |
| 1.026           | 0.981        | 0.996        | 1.001        | 1.032        | 1.011        | 0.994        | 1.019        | 1.052        | 0.987         | 0.980         | 0.992         | Q96GG9       | DCUN1D1   | DCN1-like protein 1                                 |
| 0.947           | 1.033        | 1.005        | 0.907        | 0.985        | 1.042        | 0.931        | 1.025        | 0.972        | 1.077         | 1.157         | 1.087         | Q8IWE4       | DCUN1D3   | DCN1-like protein 3                                 |
| 1.030           | 0.987        | 1.000        | 0.998        | 0.990        | 0.996        | 1.045        | 1.014        | 1.003        | 0.996         | 0.970         | 1.016         | Q9BTE7       | DCUN1D5   | DCN1-like protein 5                                 |
| 0.972           | 0.975        | 1.045        | 0.972        | 1.003        | 1.035        | 0.987        | 1.000        | 1.070        | 0.978         | 0.986         | 1.110         | Q9H773       | DCTPP1    | dCTP pyrophosphatase 1                              |
| 1.020           | 0.974        | 1.024        | 1.016        | 0.966        | 0.995        | 1.043        | 1.027        | 1.053        | 0.960         | 1.003         | 1.012         | Q9Y4B6       | DCAF1     | DDB1- and CUL4-associated factor 1                  |
| 1.217           | 1.055        | 0.982        |              |              |              |              |              |              | 0.894         | 1.082         | 1.063         | Q5QP82       | DCAF10    | DDB1- and CUL4-associated factor 10                 |
| 1.011           | 0.981        | 1.066        | 0.957        | 0.921        | 1.052        | 1.115        | 1.061        | 1.056        | 1.015         | 0.971         | 1.061         | Q8TEB1       | DCAF11    | DDB1- and CUL4-associated factor 11                 |
| 1.047           | 0.979        | 1.012        | 1.031        | 1.013        | 1.030        | 1.033        | 1.003        | 1.011        | 1.035         | 1.030         | 1.041         | A0A087WT20   | DCAF13    | DDB1- and CUL4-associated factor 13                 |
| 0.988           | 1.047        | 0.936        | 1.023        | 0.917        | 0.940        | 0.980        | 1.078        | 1.327        |               |               |               | Q9NXF7       | DCAF16    | DDB1- and CUL4-associated factor 16                 |
|                 |              |              | 1.025        | 0.808        | 0.835        | 0.811        | 1.210        | 0.928        |               |               |               | Q8WV16       | DCAF4     | DDB1- and CUL4-associated factor 4                  |

| Abundance Ratio |              |              |              |              |              |              |              |              |               |               |               | Accession ID | Gene name | Protein Description                                        |
|-----------------|--------------|--------------|--------------|--------------|--------------|--------------|--------------|--------------|---------------|---------------|---------------|--------------|-----------|------------------------------------------------------------|
| 1 d<br>M1/C1    | 1 d<br>M2/C2 | 1 d<br>M3/C3 | 4 d<br>M1/C1 | 4 d<br>M2/C2 | 4 d<br>M3/C3 | 7 d<br>M1/C1 | 7 d<br>M2/C2 | 7 d<br>M3/C3 | 10 d<br>M1/C1 | 10 d<br>M2/C2 | 10 d<br>M3/C3 |              |           |                                                            |
| 1.021           | 1.010        | 1.041        | 0.981        | 0.933        | 1.070        | 1.008        | 0.962        | 1.023        | 0.959         | 0.979         | 1.102         | P61962       | DCAF7     | DDB1- and CUL4-associated factor 7                         |
| 1.037           | 0.971        | 0.971        | 0.993        | 0.951        | 1.014        | 0.987        | 1.061        | 1.011        | 0.964         | 0.955         | 0.983         | J3KQ18       | DDT       | D-dopachrome decarboxylase                                 |
| 0.959           | 0.972        | 1.035        | 0.966        | 0.926        | 1.065        | 0.963        | 0.968        | 1.023        | 1.026         | 1.023         | 1.072         | Q96HY6       | DDRKG1    | DDRKG domain-containing protein 1                          |
| 1.014           | 0.946        | 0.944        | 0.962        | 0.981        | 0.991        | 0.984        | 1.031        | 1.042        | 0.983         | 0.993         | 1.075         | Q9UER7       | DAXX      | Death domain-associated protein 6                          |
| 1.005           | 1.088        | 1.186        | 0.957        | 0.944        | 1.073        | 0.975        | 1.089        | 0.953        | 0.956         | 1.016         | 1.002         | P78560       | CRADD     | Death domain-containing protein CRADD                      |
| 1.027           | 0.933        | 1.004        | 0.894        | 0.991        | 0.969        | 0.878        | 0.689        | 0.982        | 1.018         | 0.927         | 1.002         | P51397       | DAP       | Death-associated protein 1                                 |
| 0.974           | 0.971        | 1.024        | 0.984        | 0.944        | 1.024        | 1.024        | 1.041        | 0.968        | 0.982         | 0.961         | 1.017         | O43293       | DAPK3     | Death-associated protein kinase 3                          |
| 1.011           | 1.000        | 1.013        | 0.984        | 0.943        | 0.972        | 1.001        | 0.955        | 0.981        | 1.040         | 1.038         | 1.065         | Q9BTC0       | DIDO1     | Death-inducer obliterator 1                                |
| 1.106           | 1.124        | 1.262        | 1.001        | 0.775        | 0.980        | 0.935        | 0.821        | 0.949        | 0.711         | 0.908         | 1.087         | O77932       | DXO       | Decapping and exoribonuclease protein                      |
| 1.062           | 1.083        | 0.947        | 0.946        | 1.010        | 1.037        | 0.961        | 0.968        | 0.987        |               |               |               | Q86YH6       | PDSS2     | Decaprenyl-diphosphate synthase subunit 2                  |
| 1.020           | 1.019        | 1.029        | 1.011        | 0.936        | 0.995        | 1.016        | 1.044        | 1.008        | 0.981         | 0.962         | 1.018         | Q14185       | DOCK1     | Dedicator of cytokinesis protein 1                         |
| 1.007           | 1.012        | 0.966        | 1.109        | 0.872        | 1.029        |              |              |              |               |               |               | Q96BY6       | DOCK10    | Dedicator of cytokinesis protein 10                        |
| 1.079           | 0.982        | 1.031        | 1.003        | 0.957        | 0.988        | 1.089        | 0.953        | 1.008        | 1.043         | 0.937         | 1.035         | A6NIW2       | DOCK11    | Dedicator of cytokinesis protein 11                        |
| 0.995           | 1.173        | 1.092        | 0.966        | 1.064        | 1.169        |              |              |              |               |               |               | Q8IZD9       | DOCK3     | Dedicator of cytokinesis protein 3                         |
| 1.026           | 0.988        | 1.047        | 1.018        | 0.970        | 1.032        | 0.999        | 1.059        | 1.023        | 1.006         | 0.949         | 1.008         | Q8N1I0       | DOCK4     | Dedicator of cytokinesis protein 4                         |
| 0.991           | 1.019        | 1.042        | 1.008        | 0.931        | 1.021        | 1.020        | 1.137        | 0.995        | 0.959         | 1.012         | 0.999         | Q9H7D0       | DOCK5     | Dedicator of cytokinesis protein 5                         |
| 0.999           | 0.995        | 1.022        | 1.013        | 0.951        | 1.013        | 0.996        | 1.022        | 1.042        | 0.993         | 0.990         | 1.026         | Q96N67       | DOCK7     | Dedicator of cytokinesis protein 7                         |
| 1.055           | 1.024        | 1.038        | 1.038        | 0.936        | 1.031        | 1.055        | 1.038        | 1.085        | 1.031         | 0.984         | 1.113         | A0A0A0MSY4   | DOCK9     | Dedicator of cytokinesis protein 9                         |
| 1.243           | 1.063        | 1.042        | 0.795        | 0.981        | 1.239        | 0.992        | 1.330        | 1.163        |               |               |               | Q96E22       | NUS1      | Dehydrodolichyl diphosphate synthase complex subunit NUS1  |
| 0.984           | 1.003        | 0.968        | 0.968        | 0.934        | 0.989        | 0.995        | 0.968        | 0.973        | 1.023         | 0.920         | 1.027         | Q96LJ7       | DHRS1     | Dehydrogenase/reductase SDR family member 1                |
| 1.046           | 0.981        | 0.940        | 1.028        | 1.108        | 0.915        | 1.015        | 1.067        | 1.037        | 1.017         | 1.040         | 0.982         | Q6UWP2       | DHRS11    | Dehydrogenase/reductase SDR family member 11               |
| 1.143           | 1.047        | 1.112        | 1.136        | 0.973        | 1.001        | 1.082        | 1.138        | 1.063        | 1.082         | 1.002         | 1.034         | Q6UX07       | DHRS13    | Dehydrogenase/reductase SDR family member 13               |
| 1.027           | 1.073        | 1.032        | 0.977        | 0.872        | 0.957        | 1.022        | 1.216        | 0.947        | 0.896         | 1.058         | 0.964         | Q13268       | DHRS2     | Dehydrogenase/reductase SDR family member 2, mitochondrial |
| 1.045           | 1.018        | 1.053        | 1.016        | 1.114        | 1.028        | 1.045        | 1.016        | 1.022        | 0.997         | 1.001         | 1.039         | Q9BTZ2       | DHRS4     | Dehydrogenase/reductase SDR family member 4                |
| 0.962           | 1.054        | 0.983        | 0.992        | 0.927        | 0.990        | 0.982        | 1.058        | 0.978        | 1.002         | 1.039         | 0.973         | Q9Y394       | DHRS7     | Dehydrogenase/reductase SDR family member 7                |
| 1.107           | 0.905        | 1.010        | 1.097        | 0.803        | 1.014        | 1.152        | 1.009        | 0.987        | 1.072         | 0.944         | 1.020         | Q6IAN0       | DHRS7B    | Dehydrogenase/reductase SDR family member 7B               |
| 0.936           | 1.060        | 1.051        | 0.996        | 1.040        | 0.881        | 0.898        | 1.273        | 0.967        | 0.913         | 0.954         | 0.864         | Q8N5I4       | DHRSX     | Dehydrogenase/reductase SDR family member on chromosome X  |
| 0.999           | 1.101        | 1.039        |              |              |              | 1.011        | 1.128        | 0.936        | 0.893         | 0.897         | 0.997         | Q8NDZ4       | C3orf58   | Deleted in autism protein 1                                |
| 0.947           | 1.049        | 0.986        | 0.951        | 0.822        | 1.040        | 0.881        | 1.011        | 1.034        | 1.218         | 1.014         | 1.230         | O76062       | TM7SF2    | Delta(14)-sterol reductase                                 |
| 0.969           | 0.971        | 1.042        | 1.049        | 1.004        | 1.001        | 1.146        | 1.018        | 1.130        | 1.241         | 1.062         | 1.120         | Q15392       | DHCR24    | Delta(24)-sterol reductase                                 |
| 1.030           | 0.995        | 1.007        | 1.020        | 1.097        | 0.984        | 1.001        | 0.933        | 0.977        | 1.016         | 0.995         | 0.978         | Q13011       | ECH1      | Delta(3,5)-Delta(2,4)-dienoyl-CoA isomerase, mitochondrial |

| Abundance Ratio |              |              |              |              |              |              |              |              |               |               |               | Accession ID | Gene name | Protein Description                                             |
|-----------------|--------------|--------------|--------------|--------------|--------------|--------------|--------------|--------------|---------------|---------------|---------------|--------------|-----------|-----------------------------------------------------------------|
| 1 d<br>M1/C1    | 1 d<br>M2/C2 | 1 d<br>M3/C3 | 4 d<br>M1/C1 | 4 d<br>M2/C2 | 4 d<br>M3/C3 | 7 d<br>M1/C1 | 7 d<br>M2/C2 | 7 d<br>M3/C3 | 10 d<br>M1/C1 | 10 d<br>M2/C2 | 10 d<br>M3/C3 |              |           |                                                                 |
| 1.024           | 1.004        | 0.995        | 0.999        | 0.977        | 0.998        | 0.992        | 0.990        | 0.990        | 1.052         | 0.979         | 1.013         | P30038       | ALDH4A1   | Delta-1-pyrroline-5-carboxylate dehydrogenase, mitochondrial    |
| 0.967           | 0.986        | 0.990        | 0.980        | 0.982        | 1.013        | 0.975        | 1.009        | 1.006        | 1.009         | 0.993         | 1.013         | P54886       | ALDH18A1  | Delta-1-pyrroline-5-carboxylate synthase                        |
| 0.999           | 0.998        | 1.020        | 1.015        | 1.034        | 0.994        | 1.019        | 1.026        | 0.974        | 1.010         | 0.942         | 1.017         | P13716       | ALAD      | Delta-aminolevulinic acid dehydratase                           |
| 1.019           | 1.022        | 1.004        | 0.985        | 0.982        | 1.087        | 1.083        | 1.015        | 0.998        | 1.064         | 0.987         | 1.085         | Q8TEH3       | DENND1A   | DENN domain-containing protein 1A                               |
| 0.980           | 1.120        | 0.882        | 1.065        | 0.988        | 1.021        | 0.686        | 1.038        | 1.069        | 1.173         | 0.747         | 1.097         | Q9ULE3       | DENND2A   | DENN domain-containing protein 2A                               |
| 1.007           | 1.009        | 1.032        | 1.018        | 1.019        | 1.027        | 1.018        | 1.025        | 1.021        | 1.019         | 0.987         | 1.059         | E9PF32       | DENND3    | DENN domain-containing protein 3                                |
|                 |              |              | 0.944        | 0.901        | 1.022        |              |              |              | 1.033         | 1.087         | 1.009         | O75064       | DENND4B   | DENN domain-containing protein 4B                               |
| 1.043           | 1.043        | 1.024        | 1.000        | 0.983        | 0.989        | 0.995        | 1.082        | 0.984        | 0.951         | 0.972         | 1.004         | R4GN35       | DENND4C   | DENN domain-containing protein 4C                               |
|                 |              |              | 1.037        | 1.008        | 0.892        | 0.957        | 1.024        | 1.055        |               |               |               | Q61Q26       | DENND5A   | DENN domain-containing protein 5A                               |
| 0.972           | 0.981        | 1.014        | 0.992        | 1.019        | 1.063        | 1.246        | 1.174        | 1.192        | 1.054         | 1.016         | 1.009         | G3V1S3       | DENND5B   | DENN domain-containing protein 5B                               |
| 1.013           | 0.973        | 1.008        | 0.980        | 0.965        | 1.013        | 1.011        | 1.039        | 1.003        | 0.999         | 0.985         | 1.000         | O43583       | DENR      | Density-regulated protein                                       |
|                 |              |              |              |              |              |              |              |              | 1.151         | 0.947         | 1.330         | Q9NZJ0       | DTL       | Denticleless protein homolog                                    |
| 1.088           | 0.988        | 1.061        | 1.029        | 0.924        | 1.040        | 1.010        | 0.990        | 1.021        | 1.030         | 1.120         | 0.947         | D6RFG8       | DCK       | Deoxycytidine kinase                                            |
| 1.025           | 1.002        | 0.991        | 0.951        | 0.953        | 0.971        | 0.971        | 1.038        | 1.030        | 0.991         | 0.988         | 0.928         | Q16854       | DGUOK     | Deoxyguanosine kinase, mitochondrial                            |
| 0.975           | 0.966        | 0.990        | 0.973        | 0.959        | 1.039        | 0.966        | 1.049        | 1.044        | 0.990         | 0.989         | 1.007         | Q9BU89       | DOHH      | Deoxyhypusine hydroxylase                                       |
| 1.086           | 1.024        | 1.056        | 0.946        | 0.957        | 1.038        | 0.948        | 1.082        | 1.021        | 0.910         | 0.998         | 0.996         | P49366       | DHPS      | Deoxyhypusine synthase                                          |
| 0.988           | 0.997        | 0.987        | 1.011        | 0.982        | 0.999        | 1.031        | 1.005        | 0.979        | 1.037         | 0.965         | 1.029         | Q9Y3Z3       | SAMHD1    | Deoxynucleoside triphosphate triphosphohydrolase SAMHD1         |
| 0.994           | 0.991        | 1.015        | 1.000        | 0.961        | 1.021        | 0.972        | 1.031        | 0.949        | 0.970         | 0.980         | 0.989         | Q9H147       | DNTTIP1   | Deoxynucleotidyltransferase terminal-interacting protein 1      |
| 0.991           | 0.982        | 1.004        | 0.968        | 0.977        | 1.029        | 0.971        | 0.945        | 0.991        | 1.000         | 1.026         | 1.021         | Q5QJE6       | DNTTIP2   | Deoxynucleotidyltransferase terminal-interacting protein 2      |
| 0.945           | 0.855        | 1.205        | 0.866        | 0.967        | 0.719        | 1.190        | 1.027        | 0.958        | 0.974         | 1.058         | 0.937         | P49184       | DNASE1L1  | Deoxyribonuclease-1-like 1                                      |
| 1.030           | 0.985        | 1.005        | 1.119        | 1.064        | 1.078        | 1.200        | 1.152        | 1.135        | 1.265         | 1.166         | 1.228         | O00115       | DNASE2    | Deoxyribonuclease-2-alpha                                       |
| 1.045           | 0.973        | 1.025        | 1.020        | 0.984        | 1.004        | 0.979        | 1.005        | 1.003        | 0.920         | 1.015         | 0.970         | Q9Y315       | DERA      | Deoxyribose-phosphate aldolase                                  |
| 0.926           | 0.996        | 0.985        | 0.971        | 1.017        | 0.983        | 0.978        | 0.934        | 1.019        | 1.042         | 0.933         | 1.096         | P33316       | DUT       | Deoxyuridine 5'-triphosphate nucleotidohydrolase, mitochondrial |
| 1.086           | 1.090        | 1.073        | 0.992        | 1.044        | 0.977        | 1.015        | 0.929        | 1.027        | 1.134         | 1.019         | 1.095         | Q8TB45       | DEPTOR    | DEP domain-containing mTOR-interacting protein                  |
| 0.820           | 0.995        | 1.001        |              |              |              |              |              |              |               |               |               | Q8WUY9       | DEPDC1B   | DEP domain-containing protein 1B                                |
| 1.083           | 1.128        | 1.110        | 1.032        | 0.978        | 1.021        | 0.975        | 1.094        | 1.108        | 0.917         | 0.991         | 1.075         | O75140       | DEPDC5    | DEP domain-containing protein 5                                 |
| 0.975           | 0.952        | 1.094        | 0.995        | 0.825        | 1.041        | 1.052        | 1.050        | 0.987        | 0.998         | 0.926         | 1.025         | Q8WVC6       | DCAKD     | Dephospho-CoA kinase domain-containing protein                  |
| 1.001           | 1.041        | 0.978        | 0.960        | 0.936        | 0.996        | 1.000        | 1.102        | 1.047        | 1.054         | 1.036         | 1.061         | Q9BUN8       | DERL1     | Derlin-1                                                        |
| 1.019           | 0.933        | 0.992        | 1.070        | 1.063        | 1.143        | 1.101        | 1.178        | 1.194        | 1.027         | 1.000         | 1.029         | Q9GZP9       | DERL2     | Derlin-2                                                        |
| 1.163           | 1.132        | 1.190        |              |              |              |              |              |              | 1.107         | 1.049         | 0.869         | Q9UL01       | DSE       | Dermatan-sulfate epimerase                                      |

| Abundance Ratio |              |              |              |              |              |              |              |              |               |               |               | Accession ID | Gene name | Protein Description                                              |                                                 |
|-----------------|--------------|--------------|--------------|--------------|--------------|--------------|--------------|--------------|---------------|---------------|---------------|--------------|-----------|------------------------------------------------------------------|-------------------------------------------------|
| 1 d<br>M1/C1    | 1 d<br>M2/C2 | 1 d<br>M3/C3 | 4 d<br>M1/C1 | 4 d<br>M2/C2 | 4 d<br>M3/C3 | 7 d<br>M1/C1 | 7 d<br>M2/C2 | 7 d<br>M3/C3 | 10 d<br>M1/C1 | 10 d<br>M2/C2 | 10 d<br>M3/C3 |              |           |                                                                  |                                                 |
| 1.101           | 1.206        | 1.158        | 0.991        | 1.082        | 0.959        | 0.924        | 0.842        | 0.771        | 0.941         | 1.063         | 0.842         | P81605       | DCD       | Dermcidin                                                        |                                                 |
| 1.104           | 0.975        | 0.986        | 0.914        | 0.855        | 0.939        | 0.875        | 0.941        | 0.953        | 1.026         | 1.012         | 0.941         | P17661       | DES       | Desmin                                                           |                                                 |
| 0.966           | 0.944        | 1.007        | 0.962        | 0.916        | 0.985        | 1.002        | 1.031        | 0.923        | 0.997         | 0.823         | 0.957         | Q02487       | DSC2      | Desmocollin-2                                                    |                                                 |
| 0.975           | 1.007        | 1.015        | 1.128        | 1.066        | 1.041        | 1.122        | 0.957        | 1.074        | 0.985         | 0.920         | 0.948         | Q14574       | DSC3      | Desmocollin-3                                                    |                                                 |
|                 |              |              | 0.838        | 0.959        | 1.101        | 0.931        | 0.741        | 0.875        | 0.951         | 1.242         | 1.015         | Q02413       | DSG1      | Desmoglein-1                                                     |                                                 |
| 0.949           | 0.959        | 0.998        | 0.981        | 0.918        | 0.991        | 1.027        | 1.009        | 1.014        | 1.015         | 1.006         | 1.059         | Q14126       | DSG2      | Desmoglein-2                                                     |                                                 |
| 0.968           | 0.978        | 1.015        | 0.990        | 0.986        | 1.007        | 0.974        | 0.968        | 0.988        | 1.015         | 1.014         | 1.011         | P15924       | DSP       | Desmoplakin                                                      |                                                 |
| 0.992           | 1.008        | 0.970        | 0.997        | 1.045        | 0.998        | 1.058        | 0.960        | 1.033        | 0.982         | 0.971         | 0.986         | P60981       | DSTN      | Destrin                                                          |                                                 |
|                 |              |              |              |              |              |              |              |              | 1.073         | 0.949         | 1.176         | Q6ICB0       | DESI1     | Desumoylating isopeptidase 1                                     |                                                 |
|                 |              |              |              |              |              | 1.023        | 1.111        | 1.092        | 1.253         | 0.988         | 1.094         | Q9BSY9       | DESI2     | Desumoylating isopeptidase 2                                     |                                                 |
| 1.036           | 0.985        | 1.040        | 0.961        | 0.893        | 1.035        | 1.023        | 1.050        | 0.980        | 1.005         | 0.959         | 1.005         | Q9BW61       | DDA1      | DET1- and DDB1-associated protein 1                              |                                                 |
| 1.024           | 1.007        | 1.018        | 0.998        | 0.962        | 1.006        | 1.028        | 1.059        | 1.054        | 1.025         | 0.981         | 1.083         | Q96JH7       | VCPIP1    | Deubiquitinating protein VCIP135                                 |                                                 |
| 1.012           | 0.994        | 0.991        | 1.018        | 1.041        | 0.996        | 1.004        | 1.047        | 1.052        | 0.986         | 0.984         | 1.018         | Q9Y295       | DRG1      | Developmentally-regulated GTP-binding protein 1                  |                                                 |
| 0.974           | 0.992        | 1.033        | 1.005        | 0.999        | 1.034        | 0.997        | 1.056        | 1.039        | 0.984         | 1.004         | 1.015         | P55039       | DRG2      | Developmentally-regulated GTP-binding protein 2                  |                                                 |
| 1.036           | 1.043        | 0.902        | 1.016        | 1.079        | 0.989        | 1.083        | 0.823        | 0.779        | 0.997         | 0.895         | 0.991         | O94923       | GLCE      | D-glucuronyl C5-epimerase                                        |                                                 |
| 1.047           | 1.021        | 1.028        | 0.994        | 0.966        | 1.013        | 0.981        | 0.950        | 0.966        | 1.001         | 1.015         | 1.057         | Q9NR28       | DIABLO    | Diablo homolog, mitochondrial                                    |                                                 |
| 1.014           | 1.003        | 1.006        | 1.007        | 0.958        | 0.982        | 1.007        | 1.013        | 1.029        | 0.957         | 0.953         | 1.007         | P23743       | DGKA      | Diacylglycerol kinase alpha                                      |                                                 |
| 1.173           | 0.998        | 1.023        | 1.082        | 0.999        | 1.088        | 1.015        | 1.089        | 1.011        | 0.983         | 0.997         | 1.021         | P52429       | DGKE      | Diacylglycerol kinase epsilon                                    |                                                 |
| 1.498           | 0.613        | 1.062        | 1.009        | 1.030        | 1.027        | 0.930        | 1.122        | 0.930        | 1.108         | 0.915         | 1.000         | Q86XP1       | DGKH      | Diacylglycerol kinase eta                                        |                                                 |
| 1.030           | 0.995        | 1.178        |              |              |              |              |              |              |               |               |               | P52824       | DGKQ      | Diacylglycerol kinase theta                                      |                                                 |
| 1.016           | 0.941        | 1.105        | 1.046        | 0.859        | 1.086        | 0.898        | 1.005        | 1.123        | 1.107         | 0.944         | 1.077         | Q13574       | DGKZ      | Diacylglycerol kinase zeta                                       |                                                 |
|                 |              |              |              |              |              |              |              |              | 1.310         | 1.379         | 1.019         | O75907       | DGAT1     | Diacylglycerol O-acyltransferase 1                               |                                                 |
| 1.102           | 1.052        | 1.179        |              |              |              | 0.984        | 1.072        | 1.053        | 1.033         | 1.002         | 1.011         | Q96F10       | SAT2      | Diamine acetyltransferase 2                                      |                                                 |
| 1.018           | 1.002        | 1.012        | 0.996        | 0.992        | 1.032        | 1.012        | 1.007        | 1.031        | 0.998         | 0.955         | 1.044         | K4DI95       | DIAPH2    | Diaphanous homolog 2 (Drosophila), isoform CRA_a                 |                                                 |
| 1.068           | 0.880        | 1.076        | 0.994        | 0.928        | 1.126        |              |              |              | 0.954         | 0.960         | 1.111         | Q6ZN54       | DEF8      | Differentially expressed in FDCP 8 homolog                       |                                                 |
| 1.013           | 1.044        | 1.031        | 0.984        | 0.936        | 0.992        | 0.989        | 1.068        | 1.024        | 0.985         | 0.977         | 1.024         | Q68CQ4       | DIEXF     | Digestive organ expansion factor homolog                         |                                                 |
| 0.976           | 0.993        | 0.966        | 1.048        | 0.984        | 0.992        | 1.175        | 1.073        | 1.158        | 0.916         | 0.852         | 1.047         | P00374       | DHFR      | Dihydrofolate reductase                                          |                                                 |
| 0.942           | 0.987        | 1.008        | 0.953        | 1.006        | 1.006        | 0.960        | 0.872        | 0.985        | 0.978         | 1.013         | 1.015         | P09622       | DLD       | Dihydrolipoyl dehydrogenase, mitochondrial                       |                                                 |
|                 |              |              |              |              |              |              |              |              |               |               |               |              |           |                                                                  | Dihydrolipoyllysine-residue acetyltransferase   |
| 1.039           | 1.002        | 1.044        | 1.014        | 0.994        | 0.983        | 1.000        | 1.004        | 1.010        | 0.990         | 0.961         | 0.957         | P10515       | DLAT      | component of pyruvate dehydrogenase complex, mitochondrial       |                                                 |
|                 |              |              |              |              |              |              |              |              |               |               |               |              |           |                                                                  | Dihydrolipoyllysine-residue succinyltransferase |
| 1.004           | 0.982        | 1.005        | 0.968        | 0.944        | 0.977        | 0.968        | 0.985        | 0.975        | 0.967         | 1.008         | 0.985         | P36957       | DLST      | component of 2-oxoglutarate dehydrogenase complex, mitochondrial |                                                 |

| Abundance Ratio |              |              |              |              |              |              |              |              |               |               |               | Accession ID | Gene name | Protein Description                                                    |
|-----------------|--------------|--------------|--------------|--------------|--------------|--------------|--------------|--------------|---------------|---------------|---------------|--------------|-----------|------------------------------------------------------------------------|
| 1 d<br>M1/C1    | 1 d<br>M2/C2 | 1 d<br>M3/C3 | 4 d<br>M1/C1 | 4 d<br>M2/C2 | 4 d<br>M3/C3 | 7 d<br>M1/C1 | 7 d<br>M2/C2 | 7 d<br>M3/C3 | 10 d<br>M1/C1 | 10 d<br>M2/C2 | 10 d<br>M3/C3 |              |           |                                                                        |
| 1.016           | 0.995        | 0.991        | 1.022        | 0.993        | 1.010        | 1.012        | 1.058        | 1.035        | 0.999         | 0.995         | 1.007         | Q02127       | DHODH     | Dihydroorotate dehydrogenase (quinone), mitochondrial                  |
| 0.983           | 1.020        | 0.986        | 1.014        | 0.973        | 0.986        | 1.032        | 1.073        | 0.988        | 0.987         | 1.029         | 1.068         | P09417       | QDPR      | Dihydropteridine reductase                                             |
| 0.862           | 0.980        | 0.923        | 1.146        | 1.028        | 1.043        |              |              |              |               |               |               | Q14117       | DPYS      | Dihydropyrimidinase                                                    |
| 0.987           | 0.992        | 0.993        | 1.011        | 1.032        | 0.990        | 1.015        | 1.019        | 1.010        | 1.011         | 0.996         | 1.002         | A0A1C7CYX9   | DPYSL2    | Dihydropyrimidinase-related protein 2                                  |
| 0.742           | 1.008        | 0.803        | 0.954        | 0.952        | 1.000        |              |              |              |               |               |               | O14531       | DPYSL4    | Dihydropyrimidinase-related protein 4                                  |
| 2.577           | 0.593        | 1.069        |              |              |              | 1.029        | 0.982        | 0.964        | 0.922         | 1.208         | 0.902         | Q9BPU6       | DPYSL5    | Dihydropyrimidinase-related protein 5                                  |
| 1.190           | 1.072        | 1.057        | 1.104        | 1.076        | 1.085        | 1.103        | 1.179        | 1.136        | 1.239         | 1.212         | 1.217         | Q12882       | DPYD      | Dihydropyrimidine dehydrogenase [NADP(+)]                              |
| 0.984           | 0.990        | 1.024        | 0.985        | 0.941        | 1.022        | 0.981        | 1.065        | 1.016        | 0.967         | 0.984         | 0.975         | O15228       | GNPAT     | Dihydroxyacetone phosphate acyltransferase                             |
| 1.000           | 0.990        | 0.986        | 0.997        | 0.945        | 0.972        | 1.036        | 1.000        | 1.073        | 1.037         | 0.990         | 1.045         | Q8WVM0       | TFB1M     | Dimethyladenosine transferase 1, mitochondrial                         |
| 0.980           | 1.033        | 1.044        | 1.018        | 0.996        | 1.080        | 1.113        | 1.130        | 1.059        | 1.109         | 1.043         | 1.173         | Q9H5Q4       | TFB2M     | Dimethyladenosine transferase 2, mitochondrial                         |
| 1.037           | 1.029        | 1.005        | 1.059        | 1.093        | 1.016        | 1.005        | 0.983        | 1.005        | 1.066         | 1.003         | 1.079         | Q01459       | CTBS      | Di-N-acetylchitobiase                                                  |
| 1.069           | 0.995        | 0.956        | 0.998        | 1.059        | 0.949        | 0.986        | 0.992        | 1.002        | 0.931         | 0.951         | 0.921         | P53634       | CTSC      | Dipeptidyl peptidase 1                                                 |
| 0.986           | 0.999        | 1.012        | 0.984        | 0.957        | 1.025        | 0.985        | 1.034        | 1.019        | 0.989         | 1.011         | 0.988         | Q9UHL4       | DPP7      | Dipeptidyl peptidase 2                                                 |
| 0.998           | 0.982        | 1.001        | 0.981        | 0.978        | 1.013        | 0.987        | 1.035        | 1.018        | 1.016         | 0.989         | 1.018         | G3V180       | DPP3      | Dipeptidyl peptidase 3                                                 |
| 0.779           | 0.906        | 1.147        | 0.956        | 0.917        | 0.952        | 0.965        | 0.991        | 0.990        | 0.968         | 0.857         | 1.086         | P27487       | DPP4      | Dipeptidyl peptidase 4                                                 |
| 1.095           | 0.973        | 0.983        | 0.995        | 0.844        | 0.999        | 1.023        | 1.062        | 1.019        | 0.930         | 1.095         | 0.999         | Q6V1X1       | DPP8      | Dipeptidyl peptidase 8                                                 |
| 1.043           | 0.920        | 1.019        | 0.974        | 0.942        | 1.017        | 1.050        | 0.978        | 0.997        | 1.059         | 1.006         | 1.076         | O95989       | NUDT3     | Diphosphoinositol polyphosphate phosphohydrolase 1                     |
| 1.084           | 0.938        | 1.025        | 0.988        | 0.940        | 1.135        | 0.989        | 1.015        | 1.076        | 1.169         | 0.962         | 1.059         | Q9NZJ9       | NUDT4     | Diphosphoinositol polyphosphate phosphohydrolase 2                     |
| 0.964           | 1.025        | 1.000        | 1.007        | 0.981        | 1.031        | 1.000        | 1.052        | 1.022        | 1.050         | 1.073         | 1.055         | P53602       | MVD       | Diphosphomevalonate decarboxylase                                      |
| 1.080           | 0.935        | 1.003        | 1.082        | 1.112        | 0.961        | 0.947        | 1.224        | 0.994        | 1.222         | 0.964         | 1.085         | Q9BTV6       | DPH7      | Diphthine methyltransferase                                            |
| 0.957           | 1.005        | 1.022        | 1.010        | 0.956        | 0.997        | 0.953        | 1.098        | 1.088        | 1.107         | 1.037         | 1.031         | Q7L8W6       | DPH6      | Diphthine--ammonia ligase                                              |
| 0.756           | 0.749        | 0.937        |              |              |              | 0.976        | 1.214        | 1.164        |               |               |               | Q8TF46       | DIS3L     | DIS3-like exonuclease 1                                                |
| 1.028           | 1.013        | 1.034        | 1.008        | 0.971        | 1.026        | 1.067        | 0.999        | 1.018        | 1.047         | 0.994         | 1.083         | Q8IYB7       | DIS3L2    | DIS3-like exonuclease 2                                                |
| 0.984           | 0.910        | 0.970        | 1.039        | 0.995        | 1.033        | 0.989        | 1.050        | 1.132        | 0.868         | 0.854         | 1.064         | P98082       | DAB2      | Disabled homolog 2                                                     |
| 1.084           | 1.157        | 1.036        | 1.059        | 0.948        | 0.877        | 0.900        | 1.264        | 0.969        |               |               |               | Q5VWQ8       | DAB2IP    | Disabled homolog 2-interacting protein                                 |
| 1.014           | 1.027        | 1.022        | 1.014        | 0.939        | 1.001        | 1.004        | 1.181        | 1.021        | 0.988         | 0.992         | 1.042         | Q14689       | DIP2A     | Disco-interacting protein 2 homolog A                                  |
| 1.039           | 1.008        | 1.040        | 1.025        | 0.995        | 1.025        | 1.040        | 1.083        | 1.010        | 1.016         | 1.019         | 1.061         | Q9P265       | DIP2B     | Disco-interacting protein 2 homolog B                                  |
| 1.109           | 0.821        | 1.177        | 0.956        | 1.063        | 1.053        | 0.990        | 1.000        | 1.047        |               |               |               | Q5JUW8       | DLG3      | Discs, large homolog 3 (Neuroendocrine-dlg, Drosophila), isoform CRA_b |
|                 |              |              | 0.860        | 0.861        | 1.220        |              |              |              |               |               |               | Q9Y4D1       | DAAM1     | Disheveled-associated activator of morphogenesis 1                     |
| 1.065           | 1.001        | 1.041        | 1.048        | 0.941        | 1.048        | 1.071        | 1.063        | 1.050        | 1.041         | 1.072         | 1.111         | O14672       | ADAM10    | Disintegrin and metalloproteinase domain-containing protein 10         |

| Abundance Ratio |              |              |              |              |              |              |              |              |               |               |               | Accession ID | Gene name | Protein Description                                            |
|-----------------|--------------|--------------|--------------|--------------|--------------|--------------|--------------|--------------|---------------|---------------|---------------|--------------|-----------|----------------------------------------------------------------|
| 1 d<br>M1/C1    | 1 d<br>M2/C2 | 1 d<br>M3/C3 | 4 d<br>M1/C1 | 4 d<br>M2/C2 | 4 d<br>M3/C3 | 7 d<br>M1/C1 | 7 d<br>M2/C2 | 7 d<br>M3/C3 | 10 d<br>M1/C1 | 10 d<br>M2/C2 | 10 d<br>M3/C3 |              |           |                                                                |
| 0.935           | 0.998        | 1.029        | 1.136        | 0.983        | 1.209        | 1.120        | 1.065        | 0.980        | 1.034         | 1.222         | 1.208         | Q13444       | ADAM15    | Disintegrin and metalloproteinase domain-containing protein 15 |
| 1.056           | 1.062        | 1.015        | 0.890        | 0.914        | 0.994        | 1.088        | 1.008        | 0.999        |               |               |               | P78536       | ADAM17    | Disintegrin and metalloproteinase domain-containing protein 17 |
| 1.009           | 1.043        | 1.018        | 1.056        | 0.945        | 0.912        | 1.068        | 0.969        | 0.916        | 1.018         | 1.003         | 1.030         | Q13443       | ADAM9     | Disintegrin and metalloproteinase domain-containing protein 9  |
| 0.963           | 0.940        | 1.062        | 0.944        | 0.871        | 1.064        | 0.984        | 0.920        | 1.072        | 1.144         | 0.842         | 1.182         | Q8TDM6       | DLG5      | Disks large homolog 5                                          |
| 0.989           | 0.970        | 0.975        | 1.017        | 0.970        | 1.018        | 1.001        | 1.042        | 1.019        | 1.026         | 0.992         | 1.022         | Q9Y2H0       | DLGAP4    | Disks large-associated protein 4                               |
| 0.964           | 1.012        | 1.008        | 0.918        | 0.957        | 0.939        | 0.869        | 0.731        | 1.026        | 0.900         | 0.898         | 1.056         | Q15398       | DLGAP5    | Disks large-associated protein 5                               |
| 1.011           | 0.913        | 1.146        |              |              |              | 1.055        | 1.204        | 1.013        | 1.065         | 1.353         | 1.046         | Q96SL1       | DIRC2     | Disrupted in renal carcinoma protein 2                         |
| 1.081           | 1.002        | 1.027        | 1.023        | 0.986        | 1.029        | 0.985        | 1.001        | 1.010        | 0.968         | 0.969         | 1.021         | F5H269       | DMXL1     | DmX-like protein 1                                             |
| 0.981           | 0.999        | 1.008        | 0.999        | 0.953        | 0.993        | 0.995        | 1.087        | 1.023        | 0.976         | 0.981         | 1.052         | P26358       | DNMT1     | DNA (cytosine-5)-methyltransferase 1                           |
|                 |              |              | 0.977        | 1.311        | 0.968        | 1.023        | 1.026        | 1.610        |               |               |               | Q9Y6K1       | DNMT3A    | DNA (cytosine-5)-methyltransferase 3A                          |
| 0.989           | 0.988        | 0.993        | 0.991        | 0.970        | 1.009        | 0.988        | 1.003        | 1.025        | 0.971         | 0.959         | 0.997         | Q16531       | DDB1      | DNA damage-binding protein 1                                   |
| 1.000           | 1.037        | 1.002        | 1.005        | 0.922        | 1.005        | 1.038        | 1.102        | 1.037        | 0.956         | 0.912         | 1.050         | Q92466       | DDB2      | DNA damage-binding protein 2                                   |
| 0.903           | 0.908        | 0.985        | 0.993        | 0.846        | 1.023        | 0.995        | 0.931        | 0.954        | 1.051         | 1.006         | 1.137         | Q6UX65       | DRAM2     | DNA damage-regulated autophagy modulator protein 2             |
| 0.954           | 1.039        | 1.013        | 0.999        | 1.033        | 0.996        | 1.094        | 1.153        | 1.061        | 0.966         | 0.946         | 0.953         | B0QYD3       | APOBEC3B  | DNA dC->dU-editing enzyme APOBEC-3B                            |
| 0.970           | 1.059        | 0.952        | 1.021        | 1.006        | 0.887        | 0.992        | 1.050        | 0.993        | 0.895         | 0.982         | 0.886         | Q9NRW3       | APOBEC3C  | DNA dC->dU-editing enzyme APOBEC-3C                            |
| 1.023           | 1.011        | 1.032        | 0.973        | 0.959        | 1.033        | 0.975        | 1.100        | 1.004        | 0.960         | 0.931         | 0.965         | Q8IUX4       | APOBEC3F  | DNA dC->dU-editing enzyme APOBEC-3F                            |
| 1.036           | 1.029        | 1.021        | 0.993        | 0.971        | 0.991        | 0.971        | 0.953        | 1.000        | 0.984         | 0.937         | 0.997         | Q9HC16       | APOBEC3G  | DNA dC->dU-editing enzyme APOBEC-3G                            |
| 1.035           | 0.870        | 1.034        | 0.963        | 0.929        | 1.101        | 0.962        | 0.947        | 1.113        | 0.966         | 1.023         | 1.034         | P07992       | ERCC1     | DNA excision repair protein ERCC-1                             |
| 0.988           | 0.892        | 0.990        |              |              |              |              |              |              |               |               |               | Q03468       | ERCC6     | DNA excision repair protein ERCC-6                             |
| 1.026           | 0.976        | 1.020        | 0.962        | 0.975        | 0.929        | 0.962        | 1.110        | 1.187        | 0.776         | 0.814         | 1.114         | Q2NKX8       | ERCC6L    | DNA excision repair protein ERCC-6-like                        |
| 1.044           | 1.036        | 1.039        | 1.020        | 1.102        | 1.030        | 1.001        | 0.991        | 1.037        | 1.010         | 1.040         | 1.027         | O00273       | DFFA      | DNA fragmentation factor subunit alpha                         |
| 0.972           | 1.018        | 1.075        | 0.923        | 0.915        | 1.163        | 1.006        | 1.191        | 1.166        | 0.951         | 1.020         | 0.968         | B4DZS0       | DFFB      | DNA fragmentation factor subunit beta                          |
|                 |              |              |              |              |              | 0.723        | 0.798        | 0.921        |               |               |               | Q9NXL9       | MCM9      | DNA helicase MCM9                                              |
| 0.956           | 1.000        | 0.992        | 1.008        | 0.975        | 1.006        | 0.996        | 0.997        | 1.067        | 0.952         | 0.921         | 1.086         | P18858       | LIG1      | DNA ligase 1                                                   |
| 1.003           | 1.000        | 1.035        | 0.967        | 0.949        | 1.013        | 0.970        | 0.988        | 1.001        | 1.005         | 1.016         | 1.017         | P49916       | LIG3      | DNA ligase 3                                                   |
| 1.013           | 0.999        | 1.008        | 0.990        | 0.946        | 1.017        | 0.988        | 1.011        | 1.003        | 1.001         | 0.995         | 1.085         | P49917       | LIG4      | DNA ligase 4                                                   |
| 1.035           | 0.973        | 1.023        | 0.998        | 0.983        | 1.034        | 0.989        | 0.983        | 1.011        | 1.061         | 0.950         | 1.000         | Q9NPF5       | DMAP1     | DNA methyltransferase 1-associated protein 1                   |
| 1.029           | 1.017        | 1.026        | 1.026        | 0.975        | 1.032        | 1.015        | 1.053        | 0.969        | 0.963         | 0.994         | 1.042         | P40692       | MLH1      | DNA mismatch repair protein Mlh1                               |
| 0.974           | 0.996        | 0.989        | 0.985        | 0.964        | 0.992        | 0.987        | 1.054        | 1.006        | 0.955         | 0.962         | 0.981         | P43246       | MSH2      | DNA mismatch repair protein Msh2                               |
| 1.016           | 0.986        | 1.025        | 0.978        | 0.973        | 1.007        | 0.963        | 1.030        | 1.018        | 0.953         | 0.959         | 1.020         | P20585       | MSH3      | DNA mismatch repair protein Msh3                               |
| 0.966           | 0.983        | 0.997        | 0.988        | 0.978        | 1.018        | 1.035        | 1.080        | 0.998        | 0.957         | 0.943         | 1.026         | P52701       | MSH6      | DNA mismatch repair protein Msh6                               |



| Abundance Ratio |              |              |              |              |              |              |              |              |               |               |               | Accession ID | Gene name | Protein Description                           |
|-----------------|--------------|--------------|--------------|--------------|--------------|--------------|--------------|--------------|---------------|---------------|---------------|--------------|-----------|-----------------------------------------------|
| 1 d<br>M1/C1    | 1 d<br>M2/C2 | 1 d<br>M3/C3 | 4 d<br>M1/C1 | 4 d<br>M2/C2 | 4 d<br>M3/C3 | 7 d<br>M1/C1 | 7 d<br>M2/C2 | 7 d<br>M3/C3 | 10 d<br>M1/C1 | 10 d<br>M2/C2 | 10 d<br>M3/C3 |              |           |                                               |
| 0.741           | 0.753        | 1.155        | 0.919        | 0.952        | 0.913        | 1.019        | 0.996        | 1.062        | 0.934         | 1.194         | 1.285         | Q6NS38       | ALKBH2    | DNA oxidative demethylase ALKBH2              |
| 1.004           | 0.947        | 1.012        | 1.010        | 0.940        | 1.027        | 1.284        | 0.945        | 1.205        | 1.128         | 0.889         | 1.045         | Q14181       | POLA2     | DNA polymerase alpha subunit B                |
| 1.010           | 0.996        | 1.029        | 0.990        | 0.982        | 1.027        | 0.986        | 0.963        | 0.960        | 0.956         | 1.025         | 0.990         | P06746       | POLB      | DNA polymerase beta                           |
| 0.998           | 1.026        | 0.980        | 1.015        | 0.953        | 0.982        | 1.031        | 1.073        | 1.037        | 0.961         | 0.982         | 1.050         | A0A087WWF6   | POLD2     | DNA polymerase delta subunit 2                |
| 0.997           | 0.969        | 1.022        | 0.977        | 0.974        | 0.984        | 1.036        | 1.013        | 1.002        | 0.998         | 0.984         | 1.074         | Q15054       | POLD3     | DNA polymerase delta subunit 3                |
| 1.012           | 0.968        | 1.058        | 1.195        | 0.820        | 1.002        | 1.092        | 1.045        | 0.944        |               |               |               | Q9HCU8       | POLD4     | DNA polymerase delta subunit 4                |
| 0.980           | 1.009        | 0.993        | 0.970        | 0.939        | 1.082        | 0.970        | 1.107        | 1.015        | 0.893         | 0.896         | 1.018         | Q07864       | POLE      | DNA polymerase epsilon catalytic subunit A    |
| 1.002           | 0.995        | 1.026        | 1.024        | 1.369        | 0.939        | 1.057        | 1.073        | 1.200        | 0.934         | 0.903         | 1.273         | P56282       | POLE2     | DNA polymerase epsilon subunit 2              |
| 0.984           | 1.020        | 1.014        | 1.003        | 0.991        | 1.041        | 1.048        | 1.021        | 1.031        | 0.989         | 0.976         | 1.044         | Q9NRF9       | POLE3     | DNA polymerase epsilon subunit 3              |
| 0.992           | 0.949        | 1.062        | 0.911        | 0.927        | 1.098        | 1.053        | 0.995        | 1.052        | 0.800         | 0.935         | 0.954         | Q9NR33       | POLE4     | DNA polymerase epsilon subunit 4              |
| 1.007           | 0.794        | 1.292        | 0.942        | 1.006        | 0.975        |              |              |              |               |               |               | Q9UNA4       | POLI      | DNA polymerase iota                           |
| 0.894           | 0.948        | 1.117        |              |              |              |              |              |              | 0.966         | 0.829         | 1.110         | Q9UBT6       | POLK      | DNA polymerase kappa                          |
| 0.949           | 1.073        | 1.021        | 0.971        | 0.910        | 0.945        | 0.935        | 1.329        | 1.046        | 0.916         | 0.990         | 0.999         | A6NMQ1       | POLA1     | DNA polymerase                                |
| 0.976           | 1.024        | 1.012        | 0.994        | 0.958        | 0.982        | 1.022        | 1.104        | 1.005        | 0.960         | 0.941         | 1.019         | M0R2B7       | POLD1     | DNA polymerase                                |
| 0.977           | 0.956        | 1.080        | 0.947        | 0.937        | 1.010        | 0.988        | 0.968        | 0.988        | 1.003         | 1.006         | 1.074         | P54098       | POLG      | DNA polymerase subunit gamma-1                |
| 1.015           | 1.021        | 1.015        | 0.990        | 0.958        | 1.034        | 1.010        | 1.062        | 1.085        | 0.985         | 0.950         | 1.029         | Q9UHN1       | POLG2     | DNA polymerase subunit gamma-2, mitochondrial |
| 0.938           | 0.960        | 0.965        | 1.027        | 1.043        | 0.953        | 1.013        | 1.011        | 1.021        | 1.070         | 0.942         | 1.138         | O60673       | REV3L     | DNA polymerase zeta catalytic subunit         |
| 0.985           | 0.945        | 0.988        | 1.045        | 1.130        | 1.157        | 1.078        | 1.104        | 1.122        | 0.941         | 0.910         | 1.115         | P49643       | PRIM2     | DNA primase large subunit                     |
| 1.029           | 1.014        | 0.992        | 1.087        | 0.957        | 0.949        | 1.071        | 1.201        | 0.948        | 0.906         | 0.825         | 1.138         | P49642       | PRIM1     | DNA primase small subunit                     |
| 1.069           | 1.004        | 1.088        | 1.012        | 1.035        | 1.067        | 1.042        | 1.083        | 0.990        | 0.978         | 0.947         | 0.999         | Q92889       | ERCC4     | DNA repair endonuclease XPF                   |
| 1.246           | 0.911        | 1.103        | 1.365        | 0.630        | 1.196        | 0.974        | 0.983        | 0.966        | 1.025         | 1.087         | 1.314         | P23025       | XPA       | DNA repair protein complementing XP-A cells   |
| 1.077           | 0.995        | 1.069        | 0.995        | 0.986        | 0.994        | 0.978        | 0.964        | 0.997        | 1.015         | 0.974         | 0.961         | Q01831       | XPC       | DNA repair protein complementing XP-C cells   |
|                 |              |              |              |              |              | 0.890        | 0.864        | 1.080        | 0.921         | 1.024         | 0.956         | P28715       | ERCC5     | DNA repair protein complementing XP-G cells   |
| 1.061           | 0.973        | 0.975        |              |              |              | 0.976        | 1.091        | 0.991        | 0.801         | 0.951         | 1.099         | C9IYJ0       | RAD51B    | DNA repair protein RAD51 homolog 2            |
| 1.074           | 0.796        | 0.788        |              |              |              |              |              |              |               |               |               | O43502       | RAD51C    | DNA repair protein RAD51 homolog 3            |
| 1.046           | 1.027        | 1.013        | 1.022        | 1.079        | 0.995        | 1.031        | 0.982        | 1.000        | 0.987         | 1.011         | 0.989         | F5H8D7       | XRCC1     | DNA repair protein XRCC1                      |
| 1.023           | 0.986        | 1.018        | 0.984        | 0.962        | 0.996        | 1.006        | 1.043        | 0.987        | 1.046         | 0.981         | 1.031         | Q13426       | XRCC4     | DNA repair protein XRCC4                      |
| 1.030           | 1.023        | 0.995        | 1.037        | 0.937        | 1.088        | 0.966        | 1.044        | 1.076        | 1.116         | 1.262         | 1.051         | Q14691       | GIN51     | DNA replication complex GINS protein PSF1     |
| 0.987           | 1.073        | 1.018        | 0.922        | 1.030        | 1.062        | 1.134        | 1.147        | 0.959        | 0.873         | 0.981         | 1.013         | Q9Y248       | GIN52     | DNA replication complex GINS protein PSF2     |
| 1.005           | 1.021        | 1.009        | 1.020        | 0.939        | 0.993        | 1.096        | 1.021        | 1.041        | 0.973         | 0.959         | 1.054         | Q9BRX5       | GIN53     | DNA replication complex GINS protein PSF3     |
| 1.060           | 1.006        | 1.020        | 0.973        | 0.949        | 0.967        | 0.990        | 1.189        | 0.988        | 0.933         | 0.924         | 1.004         | Q9BRT9       | GIN54     | DNA replication complex GINS protein SLD5     |
| 1.225           | 1.050        | 1.381        | 0.883        | 1.128        | 0.987        |              |              |              |               |               |               | Q9H211       | CDT1      | DNA replication factor Cdt1                   |
| 0.974           | 0.999        | 0.986        | 0.999        | 0.993        | 1.011        | 1.025        | 1.070        | 1.027        | 0.996         | 0.989         | 1.051         | P49736       | MCM2      | DNA replication licensing factor MCM2         |

| Abundance Ratio |              |              |              |              |              |              |              |              |               |               |               | Accession ID | Gene name | Protein Description                                          |
|-----------------|--------------|--------------|--------------|--------------|--------------|--------------|--------------|--------------|---------------|---------------|---------------|--------------|-----------|--------------------------------------------------------------|
| 1 d<br>M1/C1    | 1 d<br>M2/C2 | 1 d<br>M3/C3 | 4 d<br>M1/C1 | 4 d<br>M2/C2 | 4 d<br>M3/C3 | 7 d<br>M1/C1 | 7 d<br>M2/C2 | 7 d<br>M3/C3 | 10 d<br>M1/C1 | 10 d<br>M2/C2 | 10 d<br>M3/C3 |              |           |                                                              |
| 0.994           | 0.994        | 0.983        | 1.001        | 0.971        | 0.965        | 1.051        | 1.083        | 1.037        | 0.998         | 0.977         | 1.042         | P33991       | MCM4      | DNA replication licensing factor MCM4                        |
| 0.992           | 1.001        | 0.975        | 1.010        | 1.061        | 0.963        | 1.063        | 1.048        | 1.036        | 1.037         | 0.974         | 1.054         | P33992       | MCM5      | DNA replication licensing factor MCM5                        |
| 1.006           | 0.985        | 0.998        | 1.009        | 1.072        | 0.992        | 1.078        | 1.000        | 1.024        | 1.000         | 0.975         | 1.093         | Q14566       | MCM6      | DNA replication licensing factor MCM6                        |
| 1.027           | 0.991        | 1.011        | 0.988        | 0.986        | 0.998        | 1.025        | 1.058        | 1.013        | 0.997         | 0.991         | 1.056         | P33993       | MCM7      | DNA replication licensing factor MCM7                        |
| 0.980           | 1.008        | 0.976        | 1.022        | 1.027        | 1.002        | 1.010        | 1.015        | 0.988        | 0.982         | 1.027         | 0.996         | P11387       | TOP1      | DNA topoisomerase 1                                          |
| 1.063           | 1.007        | 1.076        |              |              |              | 0.773        | 1.067        | 1.095        | 0.967         | 1.018         | 0.966         | Q92547       | TOPBP1    | DNA topoisomerase 2-binding protein 1                        |
| 1.112           | 0.934        | 1.083        | 1.053        | 0.926        | 0.954        | 1.104        | 0.920        | 1.024        | 1.111         | 0.899         | 1.066         | Q13472       | TOP3A     | DNA topoisomerase 3-alpha                                    |
| 1.083           | 1.051        | 1.020        | 1.066        | 0.975        | 0.985        | 1.036        | 1.178        | 1.003        | 1.008         | 1.014         | 0.973         | O95985       | TOP3B     | DNA topoisomerase 3-beta-1                                   |
| 0.912           | 1.105        | 1.102        | 1.116        | 1.005        | 1.017        | 1.252        | 0.949        | 1.142        | 0.922         | 1.053         | 0.962         | G3V5Q1       | APEX1     | DNA-(apurinic or apyrimidinic site) lyase (Fragment)         |
| 1.057           | 1.002        | 1.028        | 1.009        | 1.094        | 0.969        | 0.964        | 0.951        | 1.009        | 0.966         | 1.018         | 0.911         | P27695       | APEX1     | DNA-(apurinic or apyrimidinic site) lyase                    |
| 1.056           | 1.028        | 1.000        | 1.039        | 0.955        | 1.014        | 0.970        | 1.008        | 1.004        | 1.003         | 0.967         | 1.111         | O60870       | KIN       | DNA/RNA-binding protein KIN17                                |
| 1.061           | 0.986        | 1.021        | 1.032        | 1.004        | 1.001        | 0.975        | 1.050        | 1.029        | 1.034         | 1.010         | 1.026         | P29372       | MPG       | DNA-3-methyladenine glycosylase                              |
| 0.946           | 0.948        | 0.999        | 0.877        | 1.103        | 1.001        | 0.817        | 0.815        | 0.611        |               |               |               | P41134       | ID1       | DNA-binding protein inhibitor ID-1                           |
| 1.022           | 1.010        | 1.046        | 0.978        | 0.926        | 1.043        | 0.932        | 0.872        | 0.968        | 1.048         | 1.038         | 1.102         | P48382       | RFX5      | DNA-binding protein RFX5                                     |
| 0.998           | 0.926        | 0.951        | 0.950        | 0.899        | 1.051        | 0.960        | 1.029        | 1.151        | 0.904         | 0.934         | 1.020         | O14593       | RFXANK    | DNA-binding protein RFXANK                                   |
| 0.970           | 1.047        | 1.040        | 0.974        | 1.067        | 1.079        | 1.018        | 1.065        | 1.068        | 0.976         | 0.992         | 1.064         | Q9UPW6       | SATB2     | DNA-binding protein SATB2                                    |
| 0.975           | 1.001        | 1.145        | 1.006        | 1.031        | 1.081        | 0.978        | 1.055        | 1.068        | 1.006         | 0.976         | 1.064         | P38935       | IGHMBP2   | DNA-binding protein SMUBP-2                                  |
| 0.987           | 0.995        | 0.996        | 0.987        | 0.992        | 1.012        | 0.999        | 1.027        | 1.019        | 0.973         | 1.001         | 0.959         | P78527       | PRKDC     | DNA-dependent protein kinase catalytic subunit               |
| 1.062           | 0.972        | 1.053        | 1.034        | 1.010        | 1.195        | 1.163        | 1.052        | 1.039        | 1.208         | 1.060         | 1.071         | Q9NP87       | POLM      | DNA-directed DNA/RNA polymerase mu                           |
| 1.053           | 1.029        | 1.030        | 1.079        | 0.971        | 1.030        | 1.043        | 1.068        | 1.007        | 1.066         | 1.013         | 1.023         | O95602       | POLR1A    | DNA-directed RNA polymerase I subunit RPA1                   |
|                 |              |              |              |              |              |              |              |              | 1.230         | 1.009         | 1.059         | Q9P1U0       | ZNRD1     | DNA-directed RNA polymerase I subunit RPA12                  |
| 1.008           | 0.971        | 0.989        | 1.002        | 0.984        | 1.017        | 1.036        | 1.145        | 1.041        | 0.962         | 1.027         | 1.010         | Q3B726       | TWISTNB   | DNA-directed RNA polymerase I subunit RPA43                  |
| 1.082           | 1.007        | 0.971        | 0.890        | 0.997        | 0.947        | 1.154        | 0.995        | 1.061        | 0.993         | 0.941         | 1.204         | Q6EEV4       | POLR2M    | DNA-directed RNA polymerase II subunit GRINL1A, isoforms 4/5 |
| 1.010           | 1.004        | 0.996        | 1.010        | 0.973        | 1.024        | 1.006        | 1.039        | 0.996        | 0.986         | 0.992         | 1.021         | P24928       | POLR2A    | DNA-directed RNA polymerase II subunit RPB1                  |
| 1.029           | 1.011        | 0.967        | 1.015        | 1.035        | 1.008        | 1.053        | 1.051        | 0.991        | 1.001         | 0.994         | 0.992         | E2QRJ6       | POLR2J3   | DNA-directed RNA polymerase II subunit RPB11-b2              |
| 1.005           | 1.019        | 0.986        | 1.010        | 0.961        | 0.983        | 1.042        | 1.065        | 0.994        | 1.014         | 0.991         | 1.004         | P30876       | POLR2B    | DNA-directed RNA polymerase II subunit RPB2                  |
| 0.974           | 0.992        | 0.992        | 0.998        | 0.963        | 1.022        | 0.988        | 1.049        | 1.075        | 0.998         | 1.002         | 1.085         | P19387       | POLR2C    | DNA-directed RNA polymerase II subunit RPB3                  |
| 0.976           | 0.980        | 1.050        | 0.957        | 0.965        | 1.008        | 0.952        | 0.871        | 0.948        | 1.049         | 0.996         | 1.105         | O15514       | POLR2D    | DNA-directed RNA polymerase II subunit RPB4                  |
| 1.048           | 1.033        | 1.017        | 0.989        | 0.982        | 1.013        | 0.989        | 1.121        | 1.010        | 0.979         | 0.973         | 0.968         | P62487       | POLR2G    | DNA-directed RNA polymerase II subunit RPB7                  |
| 1.051           | 0.985        | 1.095        | 0.953        | 0.860        | 0.980        | 0.983        | 1.039        | 1.201        | 1.003         | 1.044         | 1.090         | P36954       | POLR2I    | DNA-directed RNA polymerase II subunit RPB9                  |
| 1.005           | 0.997        | 1.027        | 1.035        | 0.974        | 0.992        | 1.033        | 1.041        | 1.033        | 1.033         | 0.999         | 1.058         | O14802       | POLR3A    | DNA-directed RNA polymerase III subunit RPC1                 |
|                 |              |              | 1.256        | 0.799        | 1.080        | 0.969        | 1.007        | 1.112        | 0.957         | 0.938         | 1.025         | Q9Y2Y1       | POLR3K    | DNA-directed RNA polymerase III subunit RPC10                |

| Abundance Ratio |              |              |              |              |              |              |              |              |               |               |               | Accession ID | Gene name | Protein Description                                         |
|-----------------|--------------|--------------|--------------|--------------|--------------|--------------|--------------|--------------|---------------|---------------|---------------|--------------|-----------|-------------------------------------------------------------|
| 1 d<br>M1/C1    | 1 d<br>M2/C2 | 1 d<br>M3/C3 | 4 d<br>M1/C1 | 4 d<br>M2/C2 | 4 d<br>M3/C3 | 7 d<br>M1/C1 | 7 d<br>M2/C2 | 7 d<br>M3/C3 | 10 d<br>M1/C1 | 10 d<br>M2/C2 | 10 d<br>M3/C3 |              |           |                                                             |
| 1.049           | 0.938        | 1.072        | 0.983        | 0.969        | 1.046        | 0.970        | 1.078        | 1.017        | 0.995         | 0.997         | 1.054         | Q9NW08       | POLR3B    | DNA-directed RNA polymerase III subunit RPC2                |
| 0.983           | 0.977        | 1.019        | 1.035        | 0.975        | 1.080        | 1.048        | 1.051        | 1.020        | 0.976         | 0.987         | 1.042         | Q9BUI4       | POLR3C    | DNA-directed RNA polymerase III subunit RPC3                |
| 1.024           | 0.984        | 1.076        | 1.003        | 0.993        | 1.017        | 1.027        | 1.106        | 0.996        | 0.975         | 0.920         | 1.117         | P05423       | POLR3D    | DNA-directed RNA polymerase III subunit RPC4                |
| 0.970           | 1.018        | 1.003        | 1.030        | 1.003        | 1.043        | 1.056        | 1.087        | 1.009        | 1.046         | 1.026         | 1.075         | Q9NVU0       | POLR3E    | DNA-directed RNA polymerase III subunit RPC5                |
| 0.987           | 0.960        | 1.064        | 1.014        | 1.014        | 0.996        | 1.020        | 1.131        | 1.051        | 0.962         | 0.913         | 1.045         | Q9H1D9       | POLR3F    | DNA-directed RNA polymerase III subunit RPC6                |
| 1.027           | 1.004        | 0.970        | 0.956        | 0.947        | 1.015        | 1.021        | 1.110        | 1.022        | 0.918         | 0.997         | 1.030         | O15318       | POLR3G    | DNA-directed RNA polymerase III subunit RPC7                |
| 1.176           | 1.078        | 1.034        | 1.077        | 0.993        | 0.931        | 0.983        | 1.243        | 0.976        |               |               |               | Q9BT43       | POLR3GL   | DNA-directed RNA polymerase III subunit RPC7-like           |
|                 |              |              | 0.967        | 1.063        | 1.068        | 0.959        | 1.017        | 1.047        | 1.008         | 1.053         | 1.065         | Q9Y535       | POLR3H    | DNA-directed RNA polymerase III subunit RPC8                |
| 1.004           | 1.019        | 1.047        | 1.017        | 0.974        | 1.049        | 0.985        | 1.046        | 0.999        | 0.934         | 0.956         | 0.980         | O00411       | POLRMT    | DNA-directed RNA polymerase, mitochondrial                  |
| 1.035           | 0.996        | 0.995        | 1.005        | 0.973        | 0.996        | 1.030        | 1.068        | 1.019        | 0.976         | 1.020         | 1.040         | O15160       | POLR1C    | DNA-directed RNA polymerases I and III subunit RPAC1        |
| 1.008           | 0.993        | 0.989        | 0.998        | 1.016        | 1.122        | 0.984        | 0.959        | 0.969        | 1.005         | 1.048         | 1.088         | Q9Y2S0       | POLR1D    | DNA-directed RNA polymerases I and III subunit RPAC2        |
| 0.977           | 0.995        | 0.996        | 0.982        | 0.993        | 0.995        | 1.013        | 0.976        | 1.021        | 1.018         | 1.020         | 1.036         | P19388       | POLR2E    | DNA-directed RNA polymerases I, II, and III subunit RPABC1  |
| 0.927           | 0.989        | 0.948        | 1.054        | 1.034        | 0.988        | 1.077        | 1.065        | 0.863        |               |               |               | BOQYL9       | POLR2F    | DNA-directed RNA polymerases I, II, and III subunit RPABC2  |
| 1.011           | 1.001        | 1.039        | 1.040        | 1.003        | 1.019        | 1.064        | 0.971        | 0.995        | 1.074         | 1.031         | 1.077         | P52434       | POLR2H    | DNA-directed RNA polymerases I, II, and III subunit RPABC3  |
| 1.114           | 1.016        | 1.060        | 0.996        | 1.010        | 0.970        | 1.009        | 1.057        | 1.031        | 0.948         | 1.025         | 0.970         | P53803       | POLR2K    | DNA-directed RNA polymerases I, II, and III subunit RPABC4  |
| 1.038           | 0.923        | 0.932        | 0.945        | 1.176        | 0.981        | 1.001        | 0.901        | 0.962        | 1.018         | 0.984         | 1.001         | P62875       | POLR2L    | DNA-directed RNA polymerases I, II, and III subunit RPABC5  |
| 0.982           | 0.979        | 1.037        | 1.043        | 0.969        | 0.990        | 1.118        | 0.969        | 0.993        | 1.050         | 1.010         | 1.127         | J3KPS0       | DNAJB12   | DnaJ (Hsp40) homolog, subfamily B, member 12, isoform CRA_c |
| 1.012           | 1.027        | 0.989        | 0.953        | 1.023        | 0.923        | 0.977        | 0.962        | 0.973        | 0.938         | 0.974         | 0.971         | P31689       | DNAJA1    | DnaJ homolog subfamily A member 1                           |
| 1.004           | 0.978        | 0.995        | 0.989        | 1.085        | 1.010        | 1.016        | 0.935        | 1.069        | 0.972         | 0.983         | 1.005         | O60884       | DNAJA2    | DnaJ homolog subfamily A member 2                           |
| 1.028           | 0.967        | 0.988        | 0.994        | 0.993        | 0.980        | 1.014        | 0.984        | 1.002        | 0.970         | 0.939         | 0.982         | Q96EY1       | DNAJA3    | DnaJ homolog subfamily A member 3, mitochondrial            |
| 1.005           | 0.992        | 1.016        | 1.000        | 0.957        | 1.008        | 0.968        | 0.971        | 1.002        | 0.989         | 0.961         | 1.043         | P25685       | DNAJB1    | DnaJ homolog subfamily B member 1                           |
| 0.976           | 1.015        | 0.978        | 0.986        | 0.927        | 0.986        | 0.987        | 1.028        | 0.968        | 1.038         | 1.033         | 1.009         | Q9UBS4       | DNAJB11   | DnaJ homolog subfamily B member 11                          |
| 0.926           | 0.934        | 0.965        | 1.038        | 0.810        | 1.105        | 1.064        | 1.190        | 0.932        | 1.207         | 1.060         | 1.121         | Q8TBM8       | DNAJB14   | DnaJ homolog subfamily B member 14                          |
| 1.053           | 0.987        | 0.992        | 0.987        | 1.002        | 1.042        | 1.051        | 0.949        | 0.933        | 1.005         | 1.016         | 1.070         | P25686       | DNAJB2    | DnaJ homolog subfamily B member 2                           |
| 1.018           | 1.005        | 0.984        | 1.001        | 0.987        | 1.010        | 0.988        | 1.003        | 1.006        | 0.973         | 1.006         | 1.020         | Q9UDY4       | DNAJB4    | DnaJ homolog subfamily B member 4                           |
| 1.018           | 1.007        | 1.031        | 0.978        | 0.974        | 0.987        | 1.012        | 0.936        | 0.984        | 1.009         | 0.994         | 1.054         | O75190       | DNAJB6    | DnaJ homolog subfamily B member 6                           |
|                 |              |              | 0.991        | 0.880        | 0.911        | 1.293        | 1.048        | 0.868        | 1.092         | 0.986         | 1.113         | Q9UBS3       | DNAJB9    | DnaJ homolog subfamily B member 9                           |

| Abundance Ratio |              |              |              |              |              |              |              |              |               |               |               | Accession ID | Gene name | Protein Description                                                           |
|-----------------|--------------|--------------|--------------|--------------|--------------|--------------|--------------|--------------|---------------|---------------|---------------|--------------|-----------|-------------------------------------------------------------------------------|
| 1 d<br>M1/C1    | 1 d<br>M2/C2 | 1 d<br>M3/C3 | 4 d<br>M1/C1 | 4 d<br>M2/C2 | 4 d<br>M3/C3 | 7 d<br>M1/C1 | 7 d<br>M2/C2 | 7 d<br>M3/C3 | 10 d<br>M1/C1 | 10 d<br>M2/C2 | 10 d<br>M3/C3 |              |           |                                                                               |
| 0.918           | 1.018        | 1.084        | 1.080        | 1.039        | 1.002        | 1.062        | 0.920        | 0.897        | 1.105         | 1.099         | 1.047         | Q96KC8       | DNAJC1    | DnaJ homolog subfamily C member 1                                             |
| 1.016           | 1.018        | 1.015        | 1.014        | 0.981        | 0.989        | 1.019        | 0.967        | 1.007        | 1.045         | 0.984         | 1.039         | Q8IXB1       | DNAJC10   | DnaJ homolog subfamily C member 10                                            |
| 0.986           | 1.002        | 1.028        | 1.023        | 0.942        | 0.982        | 1.020        | 1.010        | 1.009        | 1.052         | 1.025         | 1.045         | Q9NVH1       | DNAJC11   | DnaJ homolog subfamily C member 11                                            |
| 1.007           | 1.008        | 1.014        | 1.003        | 1.011        | 1.025        | 0.994        | 1.068        | 1.027        | 1.011         | 0.976         | 1.039         | O75165       | DNAJC13   | DnaJ homolog subfamily C member 13                                            |
| 0.752           | 0.696        | 1.200        | 1.003        | 0.895        | 1.170        |              |              |              |               |               |               | Q6Y2X3       | DNAJC14   | DnaJ homolog subfamily C member 14                                            |
| 1.041           | 0.987        | 1.048        | 1.133        | 0.983        | 0.991        | 1.068        | 1.059        | 1.102        | 1.096         | 0.992         | 1.060         | Q9Y2G8       | DNAJC16   | DnaJ homolog subfamily C member 16                                            |
| 0.961           | 0.977        | 1.018        | 1.029        | 0.993        | 1.010        | 0.972        | 1.043        | 1.039        | 1.006         | 1.062         | 1.091         | Q9NVM6       | DNAJC17   | DnaJ homolog subfamily C member 17                                            |
| 1.004           | 0.967        | 0.992        | 0.976        | 0.978        | 1.037        | 0.998        | 0.993        | 1.024        | 0.964         | 0.903         | 1.060         | Q99543       | DNAJC2    | DnaJ homolog subfamily C member 2                                             |
|                 |              |              | 0.905        | 0.709        | 1.168        | 0.929        | 1.205        | 1.033        |               |               |               | A0A0A0MT77   | DNAJC24   | DnaJ homolog subfamily C member 24                                            |
| 1.002           | 1.347        | 1.022        | 0.994        | 0.919        | 1.057        | 1.070        | 1.095        | 0.973        | 1.107         | 0.988         | 1.105         | Q9H1X3       | DNAJC25   | DnaJ homolog subfamily C member 25                                            |
| 0.987           | 0.985        | 1.021        | 0.997        | 0.975        | 1.033        | 0.981        | 0.976        | 1.018        | 1.017         | 1.020         | 1.051         | Q13217       | DNAJC3    | DnaJ homolog subfamily C member 3                                             |
| 1.002           | 0.967        | 1.070        | 0.934        | 0.917        | 0.968        | 1.030        | 1.204        | 1.118        | 0.986         | 0.973         | 1.040         | Q96LL9       | DNAJC30   | DnaJ homolog subfamily C member 30                                            |
| 0.915           | 0.995        | 0.995        | 0.949        | 0.862        | 0.950        | 0.979        | 0.893        | 0.956        | 1.047         | 1.042         | 1.105         | Q9H3Z4       | DNAJC5    | DnaJ homolog subfamily C member 5                                             |
| 0.994           | 1.010        | 0.989        | 1.032        | 0.974        | 0.995        | 1.066        | 1.021        | 1.008        | 1.065         | 1.000         | 1.071         | Q99615       | DNAJC7    | DnaJ homolog subfamily C member 7                                             |
| 1.013           | 0.979        | 0.986        | 0.970        | 0.949        | 0.978        | 0.966        | 0.954        | 0.975        | 0.982         | 1.023         | 0.991         | O75937       | DNAJC8    | DnaJ homolog subfamily C member 8                                             |
| 1.017           | 0.980        | 1.023        | 1.018        | 0.938        | 0.998        | 0.992        | 1.027        | 1.007        | 0.950         | 1.018         | 1.024         | Q8WXX5       | DNAJC9    | DnaJ homolog subfamily C member 9                                             |
| 0.924           | 0.990        | 1.029        | 0.850        | 0.887        | 1.017        | 0.941        | 0.853        | 0.960        | 0.959         | 1.072         | 1.030         | Q5SXM8       | DNLZ      | DNL-type zinc finger protein                                                  |
| 0.881           | 0.982        | 1.006        | 1.124        | 0.937        | 1.126        | 1.035        | 1.088        | 1.008        |               |               |               | Q99704       | DOK1      | Docking protein 1                                                             |
|                 |              |              | 1.048        | 1.131        | 1.057        | 1.028        | 0.989        | 0.899        |               |               |               | Q9UPQ8       | DOLK      | Dolichol kinase                                                               |
| 1.001           | 0.975        | 0.971        | 1.071        | 0.960        | 1.078        | 1.086        | 1.065        | 1.062        | 1.175         | 0.993         | 1.048         | H0Y368       | DPM1      | Dolichol-phosphate mannosyltransferase subunit 1 (Fragment)                   |
| 0.968           | 1.017        | 1.038        | 0.998        | 0.772        | 1.165        | 1.045        | 0.999        | 0.958        | 1.211         | 1.040         | 1.108         | Q86YN1       | DOLPP1    | Dolichyldiphosphatase 1                                                       |
| 0.989           | 0.982        | 0.994        | 0.978        | 0.974        | 0.998        | 0.983        | 1.061        | 1.014        | 0.997         | 0.987         | 0.983         | P39656       | DDOST     | Dolichyl-diphosphooligosaccharide--protein glycosyltransferase 48 kDa subunit |
| 0.972           | 0.996        | 1.013        | 0.984        | 0.978        | 1.008        | 0.979        | 1.024        | 0.990        | 1.041         | 1.012         | 1.000         | P04843       | RPN1      | Dolichyl-diphosphooligosaccharide--protein glycosyltransferase subunit 1      |
| 1.249           | 1.385        | 1.305        |              |              |              | 0.555        | 1.027        | 0.975        | 0.878         | 1.085         | 0.860         | P04844       | RPN2      | Dolichyl-diphosphooligosaccharide--protein glycosyltransferase subunit 2      |
| 0.960           | 1.052        | 0.956        | 1.009        | 0.920        | 1.067        | 1.120        | 1.080        | 1.114        | 1.273         | 1.143         | 1.158         | P61803       | DAD1      | Dolichyl-diphosphooligosaccharide--protein glycosyltransferase subunit DAD1   |
| 0.939           | 0.973        | 0.962        | 0.952        | 0.878        | 1.011        | 0.982        | 0.908        | 0.979        | 1.098         | 1.008         | 1.007         | P46977       | STT3A     | Dolichyl-diphosphooligosaccharide--protein glycosyltransferase subunit STT3A  |
| 0.962           | 0.968        | 0.985        | 0.996        | 0.919        | 1.020        | 1.039        | 1.031        | 1.018        | 1.111         | 1.059         | 1.047         | Q8TCJ2       | STT3B     | Dolichyl-diphosphooligosaccharide--protein glycosyltransferase subunit STT3B  |
| 0.979           | 0.970        | 1.000        | 0.982        | 0.898        | 1.030        | 1.032        | 0.982        | 0.993        | 1.012         | 1.001         | 1.015         | Q9Y673       | ALG5      | Dolichyl-phosphate beta-glucosyltransferase                                   |
| 0.827           | 0.872        | 1.098        | 0.700        | 0.901        | 1.071        | 0.744        | 0.547        | 0.946        | 0.991         | 1.356         | 0.893         | Q5BKT4       | ALG10     | Dol-P-Glc:Glc(2)Man(9)GlcNAc(2)-PP-Dol alpha-1,2-glucosyltransferase          |

| Abundance Ratio |              |              |              |              |              |              |              |              |               |               |               | Accession ID | Gene name | Protein Description                                            |
|-----------------|--------------|--------------|--------------|--------------|--------------|--------------|--------------|--------------|---------------|---------------|---------------|--------------|-----------|----------------------------------------------------------------|
| 1 d<br>M1/C1    | 1 d<br>M2/C2 | 1 d<br>M3/C3 | 4 d<br>M1/C1 | 4 d<br>M2/C2 | 4 d<br>M3/C3 | 7 d<br>M1/C1 | 7 d<br>M2/C2 | 7 d<br>M3/C3 | 10 d<br>M1/C1 | 10 d<br>M2/C2 | 10 d<br>M3/C3 |              |           |                                                                |
| 1.047           | 0.984        | 0.980        | 0.960        | 0.925        | 0.986        | 1.012        | 1.162        | 1.056        | 1.016         | 1.032         | 0.947         | Q9BV10       | ALG12     | Dol-P-Man:Man(7)GlcNAc(2)-PP-Dol alpha-1,6-mannosyltransferase |
| 0.805           | 0.968        | 0.934        | 0.981        | 0.987        | 0.889        | 1.058        | 0.937        | 0.985        | 1.054         | 0.995         | 1.217         | M0R2J8       | DCDC1     | Doublecortin domain-containing protein 1                       |
| 1.039           | 1.021        | 1.014        | 1.010        | 1.022        | 0.991        | 0.989        | 1.026        | 1.038        | 0.949         | 0.971         | 0.998         | O60216       | RAD21     | Double-strand-break repair protein rad21 homolog               |
| 1.022           | 0.990        | 1.020        | 0.981        | 0.976        | 1.013        | 0.971        | 0.950        | 0.998        | 0.973         | 0.992         | 1.038         | O95793       | STAU1     | Double-stranded RNA-binding protein Staufen homolog 1          |
| 1.005           | 1.020        | 1.029        | 1.007        | 0.975        | 1.009        | 1.019        | 1.068        | 1.005        | 1.031         | 1.052         | 1.004         | A0A0A0MTC5   | STAU2     | Double-stranded RNA-binding protein Staufen homolog 2          |
| 1.057           | 1.119        | 0.936        | 0.931        | 1.037        | 0.960        | 0.973        | 1.097        | 0.981        | 0.978         | 0.920         | 0.951         | Q9NS39       | ADARB2    | Double-stranded RNA-specific editase B2                        |
| 1.024           | 0.975        | 1.044        | 0.988        | 0.937        | 1.001        | 0.998        | 1.120        | 1.045        | 0.976         | 1.009         | 0.985         | O14972       | DSCR3     | Down syndrome critical region protein 3                        |
| 0.967           | 1.013        | 0.998        | 1.000        | 0.946        | 1.026        | 1.024        | 0.989        | 0.963        | 0.993         | 1.037         | 1.005         | C9JCC6       | DRAP1     | Dr1-associated corepressor                                     |
| 0.993           | 0.983        | 1.010        | 0.990        | 0.989        | 0.992        | 1.007        | 0.957        | 0.998        | 1.034         | 1.012         | 1.035         | Q9UJU6       | DBNL      | Drebrin-like protein                                           |
| 0.933           | 1.307        | 1.041        |              |              |              |              |              |              |               |               |               | Q8NBA8       | DTWD2     | DTW domain-containing protein 2                                |
| 0.975           | 0.956        | 0.990        | 1.000        | 0.962        | 0.995        | 1.009        | 1.056        | 0.973        | 1.069         | 1.053         | 0.990         | Q8TEA8       | DTD1      | D-tyrosyl-tRNA(Tyr) deacylase 1                                |
| 1.166           | 1.180        | 1.198        | 0.928        | 1.305        | 1.497        | 0.956        | 0.919        | 0.903        | 0.925         | 0.814         | 0.778         | Q6XUX3       | DSTYK     | Dual serine/threonine and tyrosine protein kinase              |
| 1.011           | 1.027        | 0.990        | 0.983        | 0.955        | 1.016        | 1.000        | 1.076        | 0.993        | 0.992         | 0.975         | 1.011         | Q02750       | MAP2K1    | Dual specificity mitogen-activated protein kinase kinase 1     |
| 0.959           | 0.996        | 0.977        | 0.996        | 0.959        | 0.990        | 0.991        | 1.033        | 0.992        | 0.995         | 1.004         | 1.004         | P36507       | MAP2K2    | Dual specificity mitogen-activated protein kinase kinase 2     |
| 0.946           | 1.077        | 1.172        | 0.977        | 0.893        | 1.012        |              |              |              |               |               |               | Q13163       | MAP2K5    | Dual specificity mitogen-activated protein kinase kinase 5     |
| 1.118           | 1.143        | 0.980        | 0.941        | 0.925        | 1.178        | 0.844        | 1.009        | 1.124        |               |               |               | P49760       | CLK2      | Dual specificity protein kinase CLK2                           |
| 0.959           | 1.165        | 1.063        | 0.974        | 0.937        | 0.995        | 0.994        | 1.017        | 1.136        | 0.981         | 0.966         | 1.151         | P49761       | CLK3      | Dual specificity protein kinase CLK3                           |
| 0.868           | 0.578        | 0.916        | 0.992        | 0.928        | 1.052        | 0.923        | 1.089        | 1.020        | 0.984         | 1.000         | 1.038         | Q9HAZ1       | CLK4      | Dual specificity protein kinase CLK4                           |
| 1.025           | 1.021        | 0.980        | 0.931        | 0.910        | 0.972        | 1.005        | 1.232        | 1.002        | 0.950         | 0.925         | 1.034         | P33981       | TTK       | Dual specificity protein kinase TTK                            |
| 0.999           | 0.998        | 0.983        | 0.979        | 0.942        | 1.026        | 0.986        | 1.047        | 1.017        | 0.982         | 0.982         | 0.987         | Q9UNI6       | DUSP12    | Dual specificity protein phosphatase 12                        |
| 1.035           | 1.006        | 1.010        | 0.996        | 0.936        | 1.018        | 1.041        | 1.106        | 0.987        | 1.025         | 1.016         | 1.024         | Q9BVJ7       | DUSP23    | Dual specificity protein phosphatase 23                        |
| 1.032           | 1.007        | 0.969        | 1.033        | 0.964        | 0.976        | 1.013        | 1.022        | 1.017        | 1.042         | 0.990         | 1.013         | P51452       | DUSP3     | Dual specificity protein phosphatase 3                         |
|                 |              |              |              |              |              |              |              |              | 1.112         | 0.927         | 1.173         | Q16690       | DUSP5     | Dual specificity protein phosphatase 5                         |
|                 |              |              | 1.269        | 0.924        | 1.052        |              |              |              |               |               |               | Q16828       | DUSP6     | Dual specificity protein phosphatase 6                         |
|                 |              |              |              |              |              |              |              |              | 0.972         | 0.939         | 1.128         | Q16829       | DUSP7     | Dual specificity protein phosphatase 7                         |
| 1.089           | 1.031        | 1.011        | 1.076        | 1.010        | 0.963        | 0.953        | 1.151        | 0.957        | 1.056         | 1.031         | 0.998         | Q13627       | DYRK1A    | Dual specificity tyrosine-phosphorylation-regulated kinase 1A  |
| 0.886           | 0.913        | 0.886        |              |              |              | 1.037        | 1.292        | 0.909        | 0.806         | 0.761         | 0.980         | V9GY92       | DUSP12    | Dual-specificity protein phosphatase 12                        |

| Abundance Ratio |              |              |              |              |              |              |              |              |               |               |               | Accession ID | Gene name | Protein Description                                    |
|-----------------|--------------|--------------|--------------|--------------|--------------|--------------|--------------|--------------|---------------|---------------|---------------|--------------|-----------|--------------------------------------------------------|
| 1 d<br>M1/C1    | 1 d<br>M2/C2 | 1 d<br>M3/C3 | 4 d<br>M1/C1 | 4 d<br>M2/C2 | 4 d<br>M3/C3 | 7 d<br>M1/C1 | 7 d<br>M2/C2 | 7 d<br>M3/C3 | 10 d<br>M1/C1 | 10 d<br>M2/C2 | 10 d<br>M3/C3 |              |           |                                                        |
| 0.989           | 1.040        | 0.928        | 0.869        | 1.044        | 1.107        | 0.935        | 0.975        | 1.094        | 0.984         | 1.085         | 1.060         | Q5JU07       | CDC14B    | Dual-specificity protein phosphatase CDC14B (Fragment) |
| 0.923           | 0.992        | 1.103        | 0.981        | 0.966        | 1.050        | 0.971        | 0.919        | 1.068        | 0.911         | 1.005         | 0.905         | Q7RTS9       | DYM       | Dymeclin                                               |
| 0.979           | 0.968        | 0.995        | 0.988        | 1.017        | 1.007        | 0.995        | 0.980        | 1.020        | 1.018         | 0.989         | 1.022         | E7EX90       | DCTN1     | Dynactin subunit 1                                     |
| 1.002           | 0.977        | 1.006        | 0.993        | 0.939        | 1.007        | 1.005        | 1.010        | 0.979        | 1.003         | 0.970         | 0.995         | O75935       | DCTN3     | Dynactin subunit 3                                     |
| 0.996           | 1.013        | 1.016        | 1.017        | 0.928        | 1.006        | 1.006        | 1.049        | 1.036        | 0.988         | 0.994         | 1.010         | Q9UJW0       | DCTN4     | Dynactin subunit 4                                     |
| 0.998           | 1.013        | 0.993        | 0.961        | 0.967        | 0.999        | 0.983        | 0.939        | 1.023        | 1.042         | 1.016         | 1.037         | Q9BTE1       | DCTN5     | Dynactin subunit 5                                     |
| 1.036           | 1.039        | 0.992        | 1.043        | 1.010        | 0.981        | 1.015        | 1.020        | 0.984        | 1.003         | 1.037         | 1.000         | O00399       | DCTN6     | Dynactin subunit 6                                     |
| 0.929           | 1.002        | 1.129        | 0.986        | 1.020        | 1.044        | 1.052        | 0.972        | 0.958        | 1.024         | 0.946         | 1.082         | A0A0D9SFE4   | DNM1      | Dynamamin-1                                            |
| 1.017           | 1.000        | 1.011        | 1.017        | 1.002        | 1.019        | 1.020        | 1.028        | 1.019        | 1.026         | 0.981         | 1.009         | O00429       | DNM1L     | Dynamamin-1-like protein                               |
| 0.974           | 1.000        | 0.976        | 0.954        | 0.976        | 0.991        | 0.961        | 1.026        | 0.991        | 0.945         | 0.955         | 1.000         | P50570       | DNM2      | Dynamamin-2                                            |
| 1.002           | 0.991        | 1.036        | 0.949        | 0.973        | 0.993        | 0.935        | 0.981        | 0.997        | 0.956         | 0.941         | 1.097         | Q6XZF7       | DNMBP     | Dynamamin-binding protein                              |
| 1.009           | 1.002        | 1.046        | 0.995        | 0.998        | 1.041        | 1.031        | 1.075        | 1.050        | 1.032         | 1.002         | 1.093         | Q86Y56       | DNAAF5    | Dynein assembly factor 5, axonemal                     |
| 0.914           | 1.149        | 0.903        | 0.984        | 0.929        | 0.978        | 0.875        | 0.720        | 0.986        | 1.086         | 1.023         | 1.178         | Q4LDG9       | DNAL1     | Dynein light chain 1, axonemal                         |
| 1.092           | 0.961        | 0.974        | 1.014        | 1.308        | 0.930        | 1.010        | 0.922        | 0.985        | 0.986         | 1.007         | 0.968         | P63167       | DYNLL1    | Dynein light chain 1, cytoplasmic                      |
| 1.066           | 0.995        | 1.010        | 0.982        | 0.969        | 0.945        | 1.033        | 1.059        | 0.951        | 1.070         | 1.009         | 1.003         | Q96FJ2       | DYNLL2    | Dynein light chain 2, cytoplasmic                      |
| 1.197           | 0.949        | 1.136        | 0.874        | 1.031        | 0.966        | 1.030        | 1.082        | 1.108        |               |               |               | O96015       | DNAL4     | Dynein light chain 4, axonemal                         |
| 0.959           | 0.975        | 1.019        | 0.939        | 0.996        | 0.993        | 0.945        | 0.859        | 0.970        | 0.949         | 1.051         | 0.969         | B1AKR6       | DYNLRB1   | Dynein light chain roadblock-type 1                    |
| 0.973           | 0.983        | 1.024        | 1.011        | 1.215        | 0.991        | 0.973        | 1.043        | 0.988        | 0.922         | 1.020         | 0.995         | P63172       | DYNLT1    | Dynein light chain Tctex-type 1                        |
| 1.379           | 1.048        | 1.153        | 1.113        | 1.694        | 0.912        | 1.107        | 0.936        | 1.068        | 0.919         | 0.969         | 0.871         | A6NGJ0       | DYNLT3    | Dynein light chain Tctex-type 3                        |
| 0.979           | 0.980        | 1.002        | 1.017        | 0.974        | 1.008        | 1.059        | 1.045        | 1.096        | 1.040         | 1.028         | 1.105         | Q96EV8       | DTNBP1    | Dysbindin                                              |
| 1.012           | 1.003        | 0.989        | 1.003        | 0.876        | 0.973        | 0.905        | 1.151        | 1.025        | 0.971         | 0.963         | 1.173         | Q8IZA0       | KIAA0319L | Dyslexia-associated protein KIAA0319-like protein      |
| 0.996           | 1.038        | 1.053        | 0.999        | 0.921        | 1.036        | 1.023        | 1.097        | 1.039        | 0.984         | 0.988         | 1.047         | Q03001       | DST       | Dystonin                                               |
|                 |              |              | 0.887        | 0.861        | 1.073        | 0.833        | 1.129        | 1.131        | 0.822         | 0.836         | 1.050         | O60941       | DTNB      | Dystrobrevin beta                                      |
| 0.932           | 0.957        | 0.962        | 0.938        | 0.925        | 0.946        | 1.031        | 0.942        | 1.028        | 1.138         | 1.001         | 1.115         | Q14118       | DAG1      | Dystroglycan                                           |
| 0.927           | 0.959        | 0.986        | 0.982        | 0.931        | 0.990        | 1.023        | 1.023        | 1.016        | 0.981         | 0.861         | 1.107         | A0A075B6G3   | DMD       | Dystrophin                                             |
| 1.046           | 1.014        | 1.015        | 0.994        | 0.986        | 0.981        | 0.998        | 1.094        | 0.973        | 1.050         | 1.018         | 1.066         | Q96L91       | EP400     | E1A-binding protein p400                               |
| 0.993           | 0.985        | 1.014        | 0.917        | 1.078        | 1.043        | 0.976        | 0.906        | 0.949        | 0.973         | 1.018         | 1.180         | Q56P03       | EAPP      | E2F-associated phosphoprotein                          |
| 1.022           | 1.001        | 1.031        | 1.000        | 0.924        | 1.060        | 0.982        | 1.015        | 1.003        | 0.973         | 0.964         | 0.958         | Q9UII4       | HERC5     | E3 ISG15--protein ligase HERC5                         |
| 1.066           | 1.022        | 1.065        | 0.988        | 1.019        | 1.057        | 1.042        | 0.927        | 1.011        | 1.009         | 0.941         | 1.068         | O00257       | CBX4      | E3 SUMO-protein ligase CBX4                            |
| 1.040           | 0.981        | 0.998        | 0.992        | 0.943        | 0.965        | 1.046        | 1.039        | 1.001        | 0.978         | 0.996         | 1.136         | Q96MF7       | NSMCE2    | E3 SUMO-protein ligase NSE2                            |
| 1.136           | 0.934        | 1.046        | 1.097        | 0.995        | 1.054        | 1.192        | 1.067        | 1.094        | 0.954         | 0.979         | 1.057         | O75928       | PIAS2     | E3 SUMO-protein ligase PIAS2                           |
|                 |              |              |              |              |              | 0.785        | 0.900        | 1.057        |               |               |               | Q9Y6X2       | PIAS3     | E3 SUMO-protein ligase PIAS3                           |
| 1.073           | 1.001        | 1.010        | 0.997        | 1.030        | 0.910        | 0.969        | 1.162        | 1.012        | 0.668         | 1.056         | 1.011         | Q8N2W9       | PIAS4     | E3 SUMO-protein ligase PIAS4                           |

| Abundance Ratio |              |              |              |              |              |              |              |              |               |               |               | Accession ID | Gene name | Protein Description                          |
|-----------------|--------------|--------------|--------------|--------------|--------------|--------------|--------------|--------------|---------------|---------------|---------------|--------------|-----------|----------------------------------------------|
| 1 d<br>M1/C1    | 1 d<br>M2/C2 | 1 d<br>M3/C3 | 4 d<br>M1/C1 | 4 d<br>M2/C2 | 4 d<br>M3/C3 | 7 d<br>M1/C1 | 7 d<br>M2/C2 | 7 d<br>M3/C3 | 10 d<br>M1/C1 | 10 d<br>M2/C2 | 10 d<br>M3/C3 |              |           |                                              |
| 0.981           | 0.989        | 1.004        | 0.987        | 1.000        | 1.001        | 1.014        | 0.959        | 1.014        | 0.999         | 0.992         | 1.035         | P49792       | RANBP2    | E3 SUMO-protein ligase RanBP2                |
| 1.089           | 1.034        | 0.979        | 1.045        | 0.978        | 1.030        | 1.081        | 1.009        | 0.976        | 1.137         | 1.033         | 1.096         | Q9Y4E5       | ZNF451    | E3 SUMO-protein ligase ZNF451                |
| 1.041           | 1.029        | 1.011        | 1.010        | 0.999        | 0.976        | 1.012        | 1.031        | 0.995        | 1.006         | 0.987         | 0.992         | Q14258       | TRIM25    | E3 ubiquitin/ISG15 ligase TRIM25             |
| 1.091           | 1.058        | 1.023        | 0.963        | 0.982        | 1.025        | 1.062        | 1.113        | 0.981        | 1.133         | 1.035         | 1.115         | Q9UKV5       | AMFR      | E3 ubiquitin-protein ligase AMFR             |
| 1.010           | 0.978        | 1.010        | 0.991        | 1.024        | 0.977        | 1.043        | 1.022        | 1.017        | 1.051         | 1.021         | 1.074         | Q9Y4X5       | ARIH1     | E3 ubiquitin-protein ligase ARIH1            |
| 1.003           | 0.998        | 1.093        | 0.949        | 1.139        | 1.009        | 1.030        | 0.916        | 1.005        | 1.013         | 1.013         | 1.075         | O95376       | ARIH2     | E3 ubiquitin-protein ligase ARIH2            |
| 0.959           | 0.970        | 0.994        | 0.992        | 0.946        | 1.033        | 1.001        | 0.952        | 1.011        | 1.051         | 0.991         | 1.083         | Q5VTR2       | RNF20     | E3 ubiquitin-protein ligase BRE1A            |
| 0.993           | 0.997        | 1.031        | 1.030        | 0.960        | 1.035        | 0.996        | 0.981        | 0.980        | 1.033         | 1.027         | 1.077         | O75150       | RNF40     | E3 ubiquitin-protein ligase BRE1B            |
| 0.975           | 1.003        | 1.000        | 0.998        | 1.016        | 0.983        | 1.036        | 1.088        | 1.026        | 1.004         | 1.016         | 1.073         | P22681       | CBL       | E3 ubiquitin-protein ligase CBL              |
| 1.516           | 0.780        | 0.701        |              |              |              |              |              |              |               |               |               | Q13191       | CBLB      | E3 ubiquitin-protein ligase CBL-B            |
| 0.965           | 0.985        | 0.975        | 1.000        | 0.971        | 1.028        | 1.015        | 0.966        | 1.015        | 1.038         | 1.015         | 1.056         | Q9UNE7       | STUB1     | E3 ubiquitin-protein ligase CHIP             |
| 0.992           | 0.991        | 0.997        | 1.006        | 1.000        | 1.058        | 1.125        | 0.962        | 0.982        | 1.053         | 0.929         | 0.945         | Q8TDB6       | DTX3L     | E3 ubiquitin-protein ligase DTX3L            |
| 1.059           | 1.105        | 1.072        | 0.991        | 0.858        | 1.032        | 0.888        | 1.284        | 1.005        | 1.144         | 0.965         | 1.025         | Q8IYU2       | HACE1     | E3 ubiquitin-protein ligase HACE1            |
| 0.987           | 0.974        | 1.129        | 1.016        | 1.116        | 1.030        | 1.021        | 0.773        | 0.806        | 0.895         | 1.004         | 1.192         | Q75N03       | CBLL1     | E3 ubiquitin-protein ligase Hakai            |
| 0.982           | 1.014        | 1.030        | 0.995        | 1.032        | 1.015        | 1.016        | 0.992        | 1.051        | 0.990         | 0.950         | 1.055         | A0A087X2H1   | HECTD1    | E3 ubiquitin-protein ligase HECTD1           |
| 1.044           | 1.023        | 1.023        | 1.018        | 1.017        | 1.027        | 1.033        | 1.094        | 1.036        | 1.049         | 0.981         | 1.044         | Q5T447       | HECTD3    | E3 ubiquitin-protein ligase HECTD3           |
| 1.073           | 0.992        | 1.012        | 0.991        | 0.939        | 1.007        | 1.048        | 1.079        | 1.011        | 0.987         | 0.997         | 1.017         | O95714       | HERC2     | E3 ubiquitin-protein ligase HERC2            |
| 0.978           | 0.995        | 1.007        | 0.984        | 0.973        | 1.009        | 0.976        | 0.984        | 1.002        | 0.972         | 0.985         | 0.992         | Q7Z6Z7       | HUWE1     | E3 ubiquitin-protein ligase HUWE1            |
| 1.051           | 1.011        | 1.001        | 1.009        | 1.008        | 1.001        | 0.984        | 1.111        | 1.027        | 0.953         | 0.970         | 1.008         | Q96J02       | ITCH      | E3 ubiquitin-protein ligase Itchy homolog    |
| 0.956           | 0.992        | 1.047        | 0.996        | 0.968        | 1.017        | 0.947        | 1.019        | 1.031        | 0.977         | 0.983         | 1.042         | Q9P0J7       | KCMF1     | E3 ubiquitin-protein ligase KCMF1            |
| 0.981           | 0.997        | 1.026        | 0.983        | 0.980        | 1.006        | 1.047        | 1.036        | 1.045        | 1.054         | 0.995         | 1.092         | Q6UWE0       | LRSAM1    | E3 ubiquitin-protein ligase LRSAM1           |
| 0.948           | 0.863        | 1.016        | 0.839        | 0.851        | 1.019        | 1.187        | 0.737        | 0.922        | 1.186         | 1.037         | 0.856         | Q9UHC7       | MKRN1     | E3 ubiquitin-protein ligase makorin-1        |
| 0.936           | 1.010        | 0.993        | 1.150        | 0.971        | 0.886        | 0.993        | 1.061        | 0.921        | 1.040         | 0.982         | 1.046         | Q9NX47       |           | 5-Mar E3 ubiquitin-protein ligase MARCH5     |
| 1.012           | 0.974        | 0.981        |              |              |              | 1.139        | 0.943        | 1.076        | 1.077         | 1.030         | 0.986         | Q9H992       |           | 7-Mar E3 ubiquitin-protein ligase MARCH7     |
| 1.045           | 1.026        | 0.994        | 1.011        | 1.223        | 1.053        | 1.033        | 1.025        | 1.019        | 1.141         | 1.130         | 1.141         | K7EPJ5       | MGRN1     | E3 ubiquitin-protein ligase MGRN1 (Fragment) |
| 1.007           | 0.979        | 1.025        | 0.909        | 0.932        | 1.035        | 0.991        | 1.077        | 0.961        | 1.012         | 0.831         | 0.973         | Q86YT6       | MIB1      | E3 ubiquitin-protein ligase MIB1             |
| 0.992           | 1.004        | 1.017        | 1.006        | 0.922        | 1.028        | 1.038        | 1.186        | 1.119        | 0.985         | 0.970         | 1.007         | O75592       | MYCBP2    | E3 ubiquitin-protein ligase MYCBP2           |
| 1.012           | 1.001        | 1.009        | 0.999        | 0.966        | 1.013        | 1.028        | 1.107        | 0.984        | 0.881         | 0.896         | 1.000         | Q96PU5       | NEDD4L    | E3 ubiquitin-protein ligase NEDD4-like       |
| 0.990           | 0.979        | 0.920        | 0.978        | 0.939        | 1.115        | 1.023        | 0.946        | 1.050        | 1.148         | 1.079         | 1.142         | Q9H4P4       | RNF41     | E3 ubiquitin-protein ligase NRDP1            |
|                 |              |              | 1.067        | 1.156        | 1.085        | 1.112        | 0.845        | 1.106        | 1.518         | 0.822         | 1.077         | O43164       | PJA2      | E3 ubiquitin-protein ligase Praja-2          |
|                 |              |              |              |              |              |              |              |              | 0.980         | 0.851         | 1.038         | Q9NS91       | RAD18     | E3 ubiquitin-protein ligase RAD18            |
| 1.022           | 1.014        | 0.976        | 1.004        | 0.982        | 1.026        | 0.997        | 0.998        | 1.005        | 0.999         | 1.005         | 1.022         | Q7Z6E9       | RBBP6     | E3 ubiquitin-protein ligase RBBP6            |
| 1.690           | 1.189        | 1.336        | 1.150        | 1.996        | 0.848        | 1.010        | 0.734        | 1.104        | 0.932         | 0.991         | 0.921         | P62877       | RBX1      | E3 ubiquitin-protein ligase RBX1             |
|                 |              |              | 0.954        | 0.860        | 0.920        | 0.947        | 0.950        | 1.059        |               |               |               | Q8NHY2       | RFWD2     | E3 ubiquitin-protein ligase RFWD2            |



| Abundance Ratio |              |              |              |              |              |              |              |              |               |               |               | Accession ID | Gene name | Protein Description                    |
|-----------------|--------------|--------------|--------------|--------------|--------------|--------------|--------------|--------------|---------------|---------------|---------------|--------------|-----------|----------------------------------------|
| 1 d<br>M1/C1    | 1 d<br>M2/C2 | 1 d<br>M3/C3 | 4 d<br>M1/C1 | 4 d<br>M2/C2 | 4 d<br>M3/C3 | 7 d<br>M1/C1 | 7 d<br>M2/C2 | 7 d<br>M3/C3 | 10 d<br>M1/C1 | 10 d<br>M2/C2 | 10 d<br>M3/C3 |              |           |                                        |
| 1.076           | 0.998        | 1.027        | 0.976        | 0.874        | 1.034        | 1.015        | 1.006        | 0.945        | 1.084         | 1.019         | 0.976         | Q06587       | RING1     | E3 ubiquitin-protein ligase RING1      |
| 1.018           | 0.997        | 1.023        | 1.004        | 0.960        | 0.983        | 1.012        | 1.039        | 1.057        | 0.996         | 0.945         | 1.042         | Q99496       | RNF2      | E3 ubiquitin-protein ligase RING2      |
| 1.009           | 0.969        | 1.194        | 1.042        | 0.928        | 1.304        | 1.088        | 1.006        | 0.995        | 1.132         | 0.880         | 0.902         | Q9NVW2       | RLIM      | E3 ubiquitin-protein ligase RLIM       |
| 1.010           | 0.992        | 0.973        | 1.018        | 1.567        | 0.983        | 1.054        | 0.764        | 0.986        | 1.008         | 1.016         | 1.000         | Q9Y508       | RNF114    | E3 ubiquitin-protein ligase RNF114     |
| 0.886           | 0.924        | 1.403        | 1.011        | 1.088        | 0.987        | 1.038        | 0.797        | 1.079        | 1.076         | 0.977         | 1.424         | Q9Y4L5       | RNF115    | E3 ubiquitin-protein ligase RNF115     |
| 0.981           | 1.023        | 0.988        | 0.995        | 0.888        | 0.971        | 0.988        | 1.107        | 0.941        | 1.029         | 0.945         | 0.953         | Q5XPI4       | RNF123    | E3 ubiquitin-protein ligase RNF123     |
| 1.302           | 0.921        | 1.111        |              |              |              | 1.099        | 0.918        | 1.064        | 1.001         | 1.009         | 1.120         | Q9BV68       | RNF126    | E3 ubiquitin-protein ligase RNF126     |
| 0.952           | 0.963        | 0.995        | 1.105        | 0.969        | 1.221        | 1.005        | 1.180        | 1.145        | 1.326         | 1.171         | 1.226         | O43567       | RNF13     | E3 ubiquitin-protein ligase RNF13      |
|                 |              |              |              |              |              | 0.987        | 1.161        | 1.097        | 1.005         | 1.009         | 1.174         | E5RI87       | RNF130    | E3 ubiquitin-protein ligase RNF130     |
| 0.888           | 0.976        | 0.937        |              |              |              |              |              |              |               |               |               | Q8WVD3       | RNF138    | E3 ubiquitin-protein ligase RNF138     |
| 0.960           | 1.028        | 0.954        | 0.994        | 0.940        | 1.030        | 1.054        | 1.082        | 0.979        | 1.123         | 1.068         | 1.116         | Q8WU17       | RNF139    | E3 ubiquitin-protein ligase RNF139     |
| 0.969           | 0.990        | 1.015        | 0.969        | 0.918        | 0.976        | 0.988        | 0.965        | 1.053        | 1.038         | 0.921         | 1.103         | Q9UBS8       | RNF14     | E3 ubiquitin-protein ligase RNF14      |
| 0.926           | 1.088        | 1.050        | 1.116        | 1.091        | 1.129        | 1.146        | 1.049        | 1.089        | 0.929         | 0.879         | 1.081         | Q8NC42       | RNF149    | E3 ubiquitin-protein ligase RNF149     |
|                 |              |              | 0.999        | 0.997        | 1.160        |              |              |              | 1.105         | 0.867         | 1.250         | Q9H6Y7       | RNF167    | E3 ubiquitin-protein ligase RNF167     |
| 1.010           | 1.061        | 0.985        | 1.047        | 0.921        | 1.039        | 0.987        | 1.020        | 1.091        | 1.131         | 0.998         | 1.055         | Q8NCN4       | RNF169    | E3 ubiquitin-protein ligase RNF169     |
| 0.922           | 0.887        | 0.926        | 0.944        | 0.988        | 1.102        | 1.105        | 1.038        | 0.957        | 1.192         | 0.951         | 1.267         | Q96K19       | RNF170    | E3 ubiquitin-protein ligase RNF170     |
| 1.450           | 0.766        | 1.080        | 0.976        | 1.103        | 1.105        | 0.952        | 0.834        | 1.175        | 0.979         | 0.987         | 1.192         | Q9P0P0       | RNF181    | E3 ubiquitin-protein ligase RNF181     |
| 0.955           | 1.016        | 1.037        | 0.957        | 1.135        | 0.969        | 1.056        | 0.852        | 1.021        | 1.149         | 1.056         | 1.111         | Q96GF1       | RNF185    | E3 ubiquitin-protein ligase RNF185     |
| 0.869           | 0.888        | 0.817        | 1.088        | 0.961        | 0.924        | 1.248        | 1.240        | 1.104        | 1.178         | 0.977         | 1.136         | Q5TA31       | RNF187    | E3 ubiquitin-protein ligase RNF187     |
| 0.991           | 1.004        | 1.032        | 0.986        | 0.951        | 1.015        | 0.999        | 1.019        | 1.021        | 1.007         | 0.981         | 1.034         | A0A0A0MTR7   | RNF213    | E3 ubiquitin-protein ligase RNF213     |
| 1.049           | 1.063        | 0.962        | 0.950        | 0.880        | 1.062        | 1.052        | 1.157        | 0.974        | 1.043         | 1.044         | 1.056         | Q5VTB9       | RNF220    | E3 ubiquitin-protein ligase RNF220     |
| 1.068           | 0.917        | 1.143        | 1.025        | 0.926        | 1.053        | 1.039        | 0.834        | 1.027        | 1.108         | 1.020         | 1.159         | Q96BH1       | RNF25     | E3 ubiquitin-protein ligase RNF25      |
| 1.103           | 1.062        | 1.059        | 1.002        | 0.922        | 0.979        | 1.009        | 1.016        | 1.014        | 1.073         | 0.911         | 1.041         | Q96EP0       | RNF31     | E3 ubiquitin-protein ligase RNF31      |
| 0.937           | 0.905        | 0.921        | 0.859        | 0.829        | 0.846        | 0.837        | 0.995        | 0.921        | 1.140         | 1.133         | 1.263         | H7BYJ1       | RNF34     | E3 ubiquitin-protein ligase RNF34      |
|                 |              |              |              |              |              |              |              |              | 1.248         | 0.886         | 1.155         | P78317       | RNF4      | E3 ubiquitin-protein ligase RNF4       |
| 1.055           | 1.059        | 1.034        | 0.952        | 0.925        | 0.845        | 0.993        | 0.883        | 0.929        | 0.942         | 1.233         | 1.209         | Q99942       | RNF5      | E3 ubiquitin-protein ligase RNF5       |
|                 |              |              | 1.010        | 0.871        | 0.973        | 1.260        | 1.210        | 0.952        | 1.081         | 1.130         | 1.316         | Q7Z6J0       | SH3RF1    | E3 ubiquitin-protein ligase SH3RF1     |
| 1.052           | 0.950        | 1.161        | 1.012        | 1.085        | 1.010        | 1.004        | 1.168        | 1.026        | 1.009         | 0.972         | 0.918         | A0A0D9SFM0   | SHPRH     | E3 ubiquitin-protein ligase SHPRH      |
| 1.027           | 1.028        | 1.065        | 1.006        | 0.928        | 1.004        | 0.966        | 1.097        | 1.035        | 0.882         | 0.920         | 1.097         | Q9HAU4       | SMURF2    | E3 ubiquitin-protein ligase SMURF2     |
| 1.012           | 0.962        | 0.950        | 0.993        | 1.072        | 1.053        | 1.007        | 0.879        | 1.017        | 1.121         | 1.006         | 1.105         | Q86TM6       | SYVN1     | E3 ubiquitin-protein ligase synoviolin |
|                 |              |              |              |              |              | 0.940        | 1.085        | 0.905        | 1.142         | 1.032         | 1.020         | Q6QOC0       | TRAF7     | E3 ubiquitin-protein ligase TRAF7      |
|                 |              |              |              |              |              | 1.282        | 0.889        | 1.150        | 0.966         | 0.950         | 1.130         | Q96F44       | TRIM11    | E3 ubiquitin-protein ligase TRIM11     |
| 0.963           | 1.014        | 1.047        | 0.984        | 1.003        | 1.022        | 1.041        | 0.967        | 1.087        | 1.028         | 0.964         | 1.047         | P19474       | TRIM21    | E3 ubiquitin-protein ligase TRIM21     |
| 0.846           | 1.083        | 1.370        |              |              |              |              |              |              |               |               |               | Q8IYM9       | TRIM22    | E3 ubiquitin-protein ligase TRIM22     |

| Abundance Ratio |              |              |              |              |              |              |              |              |               |               |               | Accession ID | Gene name | Protein Description                                             |
|-----------------|--------------|--------------|--------------|--------------|--------------|--------------|--------------|--------------|---------------|---------------|---------------|--------------|-----------|-----------------------------------------------------------------|
| 1 d<br>M1/C1    | 1 d<br>M2/C2 | 1 d<br>M3/C3 | 4 d<br>M1/C1 | 4 d<br>M2/C2 | 4 d<br>M3/C3 | 7 d<br>M1/C1 | 7 d<br>M2/C2 | 7 d<br>M3/C3 | 10 d<br>M1/C1 | 10 d<br>M2/C2 | 10 d<br>M3/C3 |              |           |                                                                 |
| 1.015           | 1.019        | 1.032        | 1.030        | 1.008        | 1.079        | 1.019        | 1.027        | 1.037        | 1.045         | 1.087         | 1.003         | Q13049       | TRIM32    | E3 ubiquitin-protein ligase TRIM32                              |
| 0.983           | 1.009        | 1.003        | 0.990        | 0.977        | 0.991        | 1.047        | 1.061        | 1.020        | 0.996         | 1.021         | 1.048         | Q9UPN9       | TRIM33    | E3 ubiquitin-protein ligase TRIM33                              |
| 1.115           | 0.981        | 0.906        | 1.203        | 0.938        | 0.918        | 0.827        | 0.914        | 0.902        | 1.403         | 1.077         | 1.396         | Q9NQ86       | TRIM36    | E3 ubiquitin-protein ligase TRIM36                              |
| 1.118           | 0.941        | 0.904        |              |              |              |              |              |              | 1.092         | 1.054         | 1.276         | O94972       | TRIM37    | E3 ubiquitin-protein ligase TRIM37                              |
| 1.008           | 1.001        | 1.056        | 0.973        | 0.945        | 0.952        | 0.988        | 1.041        | 1.002        | 1.016         | 0.984         | 1.037         | O00635       | TRIM38    | E3 ubiquitin-protein ligase TRIM38                              |
| 1.037           | 1.056        | 1.051        | 1.001        | 0.982        | 1.032        | 0.997        | 1.054        | 1.008        | 1.054         | 1.037         | 1.015         | Q9C037       | TRIM4     | E3 ubiquitin-protein ligase TRIM4                               |
| 1.037           | 1.037        | 1.074        | 1.001        | 0.957        | 1.072        | 1.005        | 0.954        | 1.044        | 1.008         | 0.987         | 1.072         | Q9BRZ2       | TRIM56    | E3 ubiquitin-protein ligase TRIM56                              |
| 1.219           | 0.971        | 1.080        |              |              |              |              |              |              |               |               |               | Q6AZZ1       | TRIM68    | E3 ubiquitin-protein ligase TRIM68                              |
| 1.101           | 0.957        | 1.043        |              |              |              |              |              |              |               |               |               | P53804       | TTC3      | E3 ubiquitin-protein ligase TTC3                                |
| 0.991           | 0.992        | 0.995        | 1.003        | 0.939        | 0.998        | 1.037        | 1.122        | 1.022        | 0.980         | 0.957         | 1.002         | Q8IWV7       | UBR1      | E3 ubiquitin-protein ligase UBR1                                |
| 1.056           | 0.985        | 1.037        | 1.030        | 0.881        | 0.965        | 1.013        | 0.991        | 0.980        | 0.936         | 0.944         | 0.975         | Q8IWV8       | UBR2      | E3 ubiquitin-protein ligase UBR2                                |
| 1.007           | 1.011        | 1.018        | 0.993        | 0.956        | 1.024        | 0.985        | 1.040        | 1.005        | 0.957         | 0.996         | 0.980         | Q5T4S7       | UBR4      | E3 ubiquitin-protein ligase UBR4                                |
| 0.997           | 0.980        | 1.017        | 0.990        | 0.963        | 1.008        | 1.026        | 1.047        | 1.018        | 0.958         | 0.962         | 1.024         | O95071       | UBR5      | E3 ubiquitin-protein ligase UBR5                                |
| 1.057           | 0.896        | 1.046        | 1.046        | 0.946        | 0.959        | 1.032        | 1.022        | 1.012        | 0.875         | 0.883         | 1.037         | A0A087WTW0   | UHRF1     | E3 ubiquitin-protein ligase UHRF1                               |
| 1.179           | 1.035        | 1.086        |              |              |              |              |              |              |               |               |               | Q96PU4       | UHRF2     | E3 ubiquitin-protein ligase UHRF2                               |
| 0.977           | 1.001        | 1.074        | 1.010        | 1.014        | 1.164        | 1.051        | 0.979        | 1.069        | 1.059         | 1.018         | 1.240         | P98170       | XIAP      | E3 ubiquitin-protein ligase XIAP                                |
| 1.035           | 0.987        | 1.046        | 1.013        | 1.004        | 0.989        | 0.978        | 0.972        | 0.945        | 1.037         | 1.074         | 1.002         | Q96JP5       | ZFP91     | E3 ubiquitin-protein ligase ZFP91                               |
|                 |              |              | 1.063        | 0.870        | 0.894        |              |              |              |               |               |               | H3BQQ2       | ZNF598    | E3 ubiquitin-protein ligase ZNF598                              |
| 0.973           | 1.019        | 1.045        | 0.948        | 1.005        | 1.059        | 0.988        | 1.001        | 1.011        | 0.882         | 0.973         | 1.136         | Q86UK7       | ZNF598    | E3 ubiquitin-protein ligase ZNF598                              |
| 0.953           | 0.950        | 1.044        | 1.023        | 0.992        | 1.082        | 1.042        | 1.057        | 1.058        | 1.024         | 1.010         | 0.955         | Q8NHG8       | ZNRF2     | E3 ubiquitin-protein ligase ZNRF2                               |
| 1.015           | 1.009        | 1.017        | 1.004        | 0.970        | 1.010        | 0.986        | 1.004        | 1.021        | 1.002         | 1.038         | 1.011         | O94874       | UFL1      | E3 UFM1-protein ligase 1                                        |
| 1.014           | 0.990        | 1.034        | 0.994        | 0.980        | 1.030        | 1.008        | 0.973        | 0.997        | 1.030         | 0.978         | 1.038         | Q15075       | EEA1      | Early endosome antigen 1                                        |
| 0.962           | 1.003        | 0.984        | 1.009        | 0.964        | 1.053        | 1.020        | 1.058        | 1.002        | 1.062         | 1.039         | 1.057         | H7C2Q8       | EBNA1BP2  | EBNA1 binding protein 2, isoform CRA_d                          |
| 1.048           | 1.005        | 1.027        | 0.988        | 1.011        | 1.021        | 0.989        | 0.974        | 0.982        | 1.007         | 0.993         | 1.051         | B7WPE2       | EML3      | Echinoderm microtubule associated protein like 3, isoform CRA_e |
| 1.050           | 1.040        | 0.950        | 0.976        | 1.015        | 0.936        | 1.019        | 1.075        | 0.946        | 1.007         | 1.031         | 0.970         | Q9HC35       | EML4      | Echinoderm microtubule-associated protein-like 4                |
| 0.983           | 0.984        | 1.013        | 1.001        | 1.050        | 1.008        | 1.000        | 0.951        | 0.993        | 1.028         | 1.005         | 1.040         | B5MBZ0       | EML4      | Echinoderm microtubule-associated protein-like 4                |
| 1.296           | 1.194        | 0.955        |              |              |              |              |              |              |               |               |               | Q16206       | ENOX2     | Ecto-NOX disulfide-thiol exchanger 2                            |
| 1.009           | 0.986        | 0.983        | 1.003        | 0.977        | 0.995        |              |              |              |               |               |               | Q9Y5L3       | ENTPD2    | Ectonucleoside triphosphate diphosphohydrolase 2                |
| 1.064           | 0.920        | 1.054        |              |              |              |              |              |              |               |               |               | Q9Y227       | ENTPD4    | Ectonucleoside triphosphate diphosphohydrolase 4                |
| 1.125           | 1.013        | 1.078        | 1.018        | 0.920        | 1.062        | 0.922        | 1.132        | 0.928        | 1.042         | 1.011         | 1.044         | O75356       | ENTPD5    | Ectonucleoside triphosphate diphosphohydrolase 5                |

| Abundance Ratio |              |              |              |              |              |              |              |              |               |               |               | Accession ID | Gene name | Protein Description                                                     |
|-----------------|--------------|--------------|--------------|--------------|--------------|--------------|--------------|--------------|---------------|---------------|---------------|--------------|-----------|-------------------------------------------------------------------------|
| 1 d<br>M1/C1    | 1 d<br>M2/C2 | 1 d<br>M3/C3 | 4 d<br>M1/C1 | 4 d<br>M2/C2 | 4 d<br>M3/C3 | 7 d<br>M1/C1 | 7 d<br>M2/C2 | 7 d<br>M3/C3 | 10 d<br>M1/C1 | 10 d<br>M2/C2 | 10 d<br>M3/C3 |              |           |                                                                         |
| 0.994           | 0.990        | 0.995        | 1.045        | 1.015        | 1.012        | 1.079        | 1.103        | 1.149        |               |               |               | O75354       | ENTPD6    | Ectonucleoside triphosphate diphosphohydrolase 6                        |
|                 |              |              | 0.971        | 0.996        | 1.017        |              |              |              | 0.971         | 0.928         | 1.165         | Q9HCE0       | EPG5      | Ectopic P granules protein 5 homolog                                    |
|                 |              |              |              |              |              |              |              |              | 1.517         | 0.789         | 0.923         | Q5JPI9       | EEF1AKMT2 | EEF1A lysine methyltransferase 2                                        |
| 0.809           | 1.095        | 0.958        |              |              |              |              |              |              |               |               |               | O75071       | EFCAB14   | EF-hand calcium-binding domain-containing protein 14                    |
|                 |              |              |              |              |              | 1.036        | 1.135        | 1.169        |               |               |               | A8K855       | EFCAB7    | EF-hand calcium-binding domain-containing protein 7                     |
| 0.965           | 0.916        | 0.953        | 1.046        | 1.067        | 1.176        | 0.831        | 1.144        | 1.066        |               |               |               | Q9BUP0       | EFHD1     | EF-hand domain-containing protein D1                                    |
| 0.997           | 1.005        | 0.967        | 1.000        | 0.981        | 1.005        | 0.988        | 1.061        | 0.982        | 0.960         | 0.986         | 0.989         | Q96C19       | EFHD2     | EF-hand domain-containing protein D2                                    |
| 1.072           | 1.007        | 1.022        | 1.005        | 0.948        | 1.015        | 1.007        | 1.018        | 1.010        | 1.013         | 0.986         | 1.013         | Q5NDL2       | EOGT      | EGF domain-specific O-linked N-acetylglucosamine transferase            |
| 1.070           | 0.944        | 1.058        | 0.966        | 0.982        | 1.040        | 1.018        | 0.966        | 1.041        | 1.028         | 0.968         | 1.035         | Q9GZT9       | EGLN1     | Egl nine homolog 1                                                      |
| 0.993           | 0.978        | 1.046        | 0.992        | 0.919        | 1.010        | 1.005        | 0.915        | 1.039        | 1.002         | 0.947         | 1.078         | Q8N3D4       | EHBP1L1   | EH domain-binding protein 1-like protein 1                              |
| 0.973           | 1.000        | 1.010        | 0.973        | 0.980        | 0.986        | 0.973        | 1.038        | 0.997        | 0.946         | 0.974         | 0.975         | A0A024R571   | EHD1      | EH domain-containing protein 1                                          |
| 0.962           | 0.995        | 1.015        | 0.976        | 0.944        | 1.022        | 0.994        | 1.010        | 1.030        | 1.022         | 0.955         | 0.961         | Q9NZN4       | EHD2      | EH domain-containing protein 2                                          |
| 0.989           | 0.979        | 0.980        | 0.975        | 0.929        | 1.003        | 0.997        | 1.067        | 1.007        | 0.982         | 0.942         | 1.007         | Q9H223       | EHD4      | EH domain-containing protein 4                                          |
| 0.976           | 0.989        | 1.020        | 0.988        | 0.979        | 1.013        | 0.986        | 0.995        | 1.014        | 0.971         | 0.990         | 0.998         | Q92616       | GCN1      | eIF-2-alpha kinase activator GCN1                                       |
| 0.969           | 0.986        | 1.038        | 0.951        | 0.956        | 1.033        | 1.000        | 1.079        | 1.027        | 1.033         | 0.991         | 1.010         | Q9P2K8       | EIF2AK4   | eIF-2-alpha kinase GCN2                                                 |
| 1.025           | 0.983        | 0.953        | 0.924        | 0.947        | 1.008        | 1.112        | 1.028        | 1.085        | 1.096         | 0.965         | 1.042         | Q9BXV9       | GON7      | EKC/KEOPS complex subunit GON7                                          |
| 1.027           | 0.945        | 1.048        | 1.022        | 0.938        | 1.036        | 1.029        | 0.955        | 0.995        | 1.140         | 0.998         | 1.214         | Q14657       | LAGE3     | EKC/KEOPS complex subunit LAGE3                                         |
| 0.950           | 0.957        | 1.077        | 0.986        | 0.976        | 1.092        | 0.930        | 1.047        | 1.055        | 0.893         | 1.007         | 1.062         | Q9Y3C4       | TPRKB     | EKC/KEOPS complex subunit TPRKB                                         |
| 1.019           | 0.997        | 1.010        | 0.987        | 1.096        | 0.999        | 1.003        | 0.954        | 1.012        | 0.984         | 0.988         | 0.990         | P13804       | ETFA      | Electron transfer flavoprotein subunit alpha, mitochondrial             |
| 1.030           | 1.007        | 1.017        | 0.984        | 0.946        | 0.998        | 0.967        | 1.019        | 0.964        | 0.979         | 0.969         | 0.949         | P38117       | ETFB      | Electron transfer flavoprotein subunit beta                             |
| 0.993           | 0.979        | 1.022        | 0.983        | 0.986        | 1.039        | 1.018        | 1.017        | 1.032        | 1.078         | 0.989         | 1.101         | Q16134       | ETFDH     | Electron transfer flavoprotein-ubiquinone oxidoreductase, mitochondrial |
| 0.991           | 0.986        | 1.011        | 0.981        | 0.956        | 1.010        | 1.012        | 0.929        | 1.014        | 1.020         | 0.971         | 1.043         | X6RLX0       | ERC1      | ELKS/Rab6-interacting/CAST family member 1                              |
|                 |              |              | 0.979        | 0.922        | 1.039        | 1.062        | 1.131        | 1.091        | 1.051         | 1.062         | 1.097         | Q96JC9       | EAF1      | ELL-associated factor 1                                                 |
| 0.998           | 0.995        | 1.020        | 0.980        | 0.931        | 1.020        | 0.969        | 0.960        | 1.002        | 1.050         | 0.980         | 1.044         | A0A1C7CYX1   | ELMSAN1   | ELM2 and SANT domain-containing protein 1                               |
| 0.970           | 0.950        | 1.012        | 0.952        | 0.887        | 0.975        | 0.944        | 0.950        | 0.945        | 0.923         | 0.996         | 0.946         | Q8IZ81       | ELMOD2    | ELMO domain-containing protein 2                                        |
| 1.101           | 0.895        | 1.031        | 0.946        | 1.357        | 0.954        | 0.976        | 1.006        | 1.128        | 0.816         | 1.047         | 0.923         | A0A087WVQ9   | EEF1A1    | Elongation factor 1-alpha 1                                             |
| 1.029           | 0.955        | 0.976        | 1.037        | 1.022        | 0.995        | 1.017        | 0.915        | 0.990        | 1.064         | 0.998         | 0.997         | Q05639       | EEF1A2    | Elongation factor 1-alpha 2                                             |
| 0.991           | 1.000        | 0.932        | 1.013        | 1.006        | 0.967        | 1.017        | 1.074        | 0.989        | 1.021         | 1.037         | 0.965         | P24534       | EEF1B2    | Elongation factor 1-beta                                                |
| 0.990           | 0.987        | 0.984        | 0.993        | 1.056        | 0.976        | 0.982        | 0.971        | 0.978        | 0.958         | 1.006         | 0.969         | E9PRY8       | EEF1D     | Elongation factor 1-delta                                               |
| 0.987           | 1.014        | 0.998        | 1.037        | 1.168        | 1.010        | 1.010        | 0.988        | 1.059        | 0.946         | 1.025         | 0.948         | P13639       | EEF2      | Elongation factor 2                                                     |

| Abundance Ratio |              |              |              |              |              |              |              |              |               |               |               | Accession ID | Gene name | Protein Description                                                     |
|-----------------|--------------|--------------|--------------|--------------|--------------|--------------|--------------|--------------|---------------|---------------|---------------|--------------|-----------|-------------------------------------------------------------------------|
| 1 d<br>M1/C1    | 1 d<br>M2/C2 | 1 d<br>M3/C3 | 4 d<br>M1/C1 | 4 d<br>M2/C2 | 4 d<br>M3/C3 | 7 d<br>M1/C1 | 7 d<br>M2/C2 | 7 d<br>M3/C3 | 10 d<br>M1/C1 | 10 d<br>M2/C2 | 10 d<br>M3/C3 |              |           |                                                                         |
| 1.019           | 1.009        | 1.004        | 1.008        | 0.991        | 0.978        | 0.995        | 1.004        | 0.993        | 1.024         | 0.987         | 0.977         | Q96RP9       | GFM1      | Elongation factor G, mitochondrial                                      |
| 0.994           | 0.979        | 0.992        | 0.984        | 1.065        | 0.942        | 1.016        | 0.876        | 1.012        | 1.011         | 0.939         | 0.988         | P43897       | TSFM      | Elongation factor Ts, mitochondrial                                     |
| 1.018           | 0.990        | 0.991        | 1.012        | 1.058        | 0.978        | 1.030        | 1.011        | 1.024        | 1.011         | 0.989         | 1.018         | P49411       | TUFM      | Elongation factor Tu, mitochondrial                                     |
| 1.005           | 0.998        | 0.998        | 1.010        | 0.995        | 0.970        | 1.024        | 1.028        | 1.002        | 1.029         | 0.984         | 1.048         | Q7Z2Z2       | EFL1      | Elongation factor-like GTPase 1                                         |
| 0.972           | 1.050        | 0.947        | 0.934        | 0.850        | 0.903        | 1.062        | 1.067        | 0.923        | 1.012         | 1.038         | 1.145         | Q9BW60       | ELOVL1    | Elongation of very long chain fatty acids protein 1                     |
| 1.044           | 0.946        | 0.906        | 0.995        | 0.908        | 0.979        | 1.072        | 1.148        | 0.998        | 1.044         | 0.972         | 1.007         | A1L3X0       | ELOVL7    | Elongation of very long chain fatty acids protein 7                     |
| 0.997           | 0.992        | 1.014        | 1.010        | 0.987        | 0.999        | 1.015        | 1.049        | 1.039        | 1.000         | 0.975         | 1.058         | O95163       | IKBKAP    | Elongator complex protein 1                                             |
| 1.033           | 1.042        | 0.996        | 1.051        | 1.085        | 1.115        | 1.061        | 1.109        | 1.058        | 1.037         | 1.010         | 1.098         | Q9H9T3       | ELP3      | Elongator complex protein 3                                             |
| 1.023           | 1.012        | 1.009        | 0.990        | 0.992        | 0.992        | 0.987        | 1.004        | 0.986        | 1.004         | 0.974         | 1.005         | Q96EB1       | ELP4      | Elongator complex protein 4                                             |
| 1.066           | 1.068        | 1.015        | 0.990        | 0.942        | 0.977        | 1.027        | 1.035        | 1.003        | 1.005         | 0.976         | 1.032         | Q0PNE2       | ELP6      | Elongator complex protein 6                                             |
| 1.004           | 0.985        | 1.045        | 1.021        | 0.980        | 1.049        | 1.025        | 0.999        | 1.003        | 1.004         | 1.045         | 1.034         | Q14241       | ELOA      | Elongin-A                                                               |
| 1.028           | 0.997        | 0.978        | 1.017        | 0.996        | 1.018        | 1.007        | 1.033        | 1.016        | 1.008         | 0.993         | 1.012         | Q15370       | ELOB      | Elongin-B                                                               |
| 0.990           | 0.999        | 1.046        | 1.037        | 1.024        | 1.010        | 1.007        | 0.957        | 0.996        | 0.995         | 1.037         | 0.924         | Q15369       | ELOC      | Elongin-C                                                               |
| 0.979           | 0.978        | 1.006        | 1.057        | 0.989        | 1.007        |              |              |              | 1.013         | 0.916         | 1.046         | Q6PCB8       | EMB       | Embigin                                                                 |
| 1.012           | 0.967        | 0.986        | 0.970        | 0.979        | 0.982        | 0.997        | 1.011        | 1.043        | 0.977         | 0.953         | 1.010         | Q96FZ2       | HMCES     | Embryonic stem cell-specific 5-hydroxymethylcytosine-binding protein    |
| 0.965           | 1.006        | 0.984        | 1.016        | 0.923        | 0.988        | 1.050        | 1.029        | 0.947        | 1.119         | 1.075         | 1.069         | P50402       | EMD       | Emerin                                                                  |
| 0.867           | 0.928        | 0.918        | 0.948        | 0.899        | 0.909        | 1.023        | 1.111        | 1.001        | 0.981         | 1.026         | 0.908         | A0A0U1RQV1   | ERVK3-1   | Endogenous retrovirus group K3 member 1 (Fragment)                      |
| 0.964           | 1.012        | 1.158        | 0.958        | 0.946        | 1.000        | 1.024        | 0.892        | 0.965        | 0.939         | 0.936         | 1.062         | P17813       | ENG       | Endoglin                                                                |
| 1.166           | 1.053        | 1.089        | 0.958        | 0.940        | 0.960        | 0.982        | 1.222        | 0.992        | 0.946         | 1.012         | 0.998         | Q969S2       | NEIL2     | Endonuclease 8-like 2                                                   |
| 1.020           | 1.039        | 1.000        | 1.065        | 1.070        | 1.042        | 0.984        | 1.003        | 1.021        | 1.062         | 1.124         | 1.075         | O94919       | ENDOD1    | Endonuclease domain-containing 1 protein                                |
| 0.999           | 0.984        | 0.980        | 0.944        | 1.040        | 0.978        | 0.963        | 0.998        | 1.013        | 1.002         | 0.981         | 0.986         | Q14249       | ENDOG     | Endonuclease G, mitochondrial                                           |
| 1.090           | 1.031        | 1.031        | 1.061        | 1.048        | 1.043        | 1.063        | 1.061        | 1.079        | 1.043         | 1.024         | 1.092         | P78549       | NTHL1     | Endonuclease III-like protein 1                                         |
|                 |              |              | 0.996        | 0.958        | 1.096        | 0.966        | 1.126        | 1.024        | 1.106         | 0.808         | 0.979         | Q8N8Q3       | ENDOV     | Endonuclease V                                                          |
| 1.015           | 1.078        | 0.916        | 1.034        | 0.842        | 1.108        |              |              |              | 1.089         | 1.032         | 1.154         | Q7L9B9       | EEPD1     | Endonuclease/exonuclease/phosphatase family domain-containing protein 1 |
| 1.000           | 1.000        | 1.012        | 0.993        | 0.985        | 1.009        | 0.978        | 1.017        | 0.960        | 0.981         | 1.009         | 0.987         | Q99961       | SH3GL1    | Endophilin-A2                                                           |
| 1.016           | 1.022        | 1.008        | 0.986        | 0.972        | 0.980        | 0.975        | 1.049        | 0.990        | 1.022         | 0.979         | 0.998         | Q9Y371       | SH3GLB1   | Endophilin-B1                                                           |
| 0.991           | 1.001        | 1.001        | 1.009        | 1.009        | 1.011        | 1.024        | 1.002        | 1.026        | 1.048         | 0.992         | 1.030         | B7ZC38       | SH3GLB2   | Endophilin-B2                                                           |
| 1.038           | 1.046        | 0.997        | 0.992        | 0.999        | 1.033        | 1.022        | 1.021        | 1.022        | 1.043         | 1.021         | 1.030         | Q96DZ1       | ERLEC1    | Endoplasmic reticulum lectin 1                                          |
| 0.995           | 0.991        | 1.042        | 0.991        | 0.917        | 1.034        | 1.010        | 0.996        | 1.037        | 1.027         | 1.021         | 1.041         | Q9UKM7       | MAN1B1    | Endoplasmic reticulum mannosyl-oligosaccharide 1,2-alpha-mannosidase    |
| 0.929           | 0.982        | 0.984        | 0.956        | 0.944        | 0.989        | 1.028        | 0.989        | 1.009        | 1.121         | 1.058         | 1.081         | Q7Z2K6       | ERMP1     | Endoplasmic reticulum metallopeptidase 1                                |

| Abundance Ratio |              |              |              |              |              |              |              |              |               |               |               | Accession ID | Gene name | Protein Description                                                       |
|-----------------|--------------|--------------|--------------|--------------|--------------|--------------|--------------|--------------|---------------|---------------|---------------|--------------|-----------|---------------------------------------------------------------------------|
| 1 d<br>M1/C1    | 1 d<br>M2/C2 | 1 d<br>M3/C3 | 4 d<br>M1/C1 | 4 d<br>M2/C2 | 4 d<br>M3/C3 | 7 d<br>M1/C1 | 7 d<br>M2/C2 | 7 d<br>M3/C3 | 10 d<br>M1/C1 | 10 d<br>M2/C2 | 10 d<br>M3/C3 |              |           |                                                                           |
| 0.976           | 1.028        | 0.951        | 0.992        | 1.010        | 0.993        | 0.978        | 1.026        | 0.990        | 0.985         | 0.997         | 0.964         | P30040       | ERP29     | Endoplasmic reticulum resident protein 29                                 |
| 1.011           | 1.022        | 0.970        | 1.014        | 1.017        | 0.994        | 1.025        | 1.042        | 1.010        | 1.001         | 1.021         | 1.009         | Q9BS26       | ERP44     | Endoplasmic reticulum resident protein 44                                 |
| 0.994           | 1.008        | 0.975        | 0.980        | 0.914        | 0.934        | 1.008        | 1.019        | 0.961        | 1.103         | 1.011         | 0.971         | Q969X5       | ERGIC1    | Endoplasmic reticulum-Golgi intermediate compartment protein 1            |
| 1.011           | 0.996        | 0.991        | 1.058        | 0.965        | 1.080        | 1.086        | 1.042        | 0.985        | 0.979         | 0.994         | 1.004         | A0A087WU02   | ERGIC2    | Endoplasmic reticulum-Golgi intermediate compartment protein 2            |
| 0.975           | 1.008        | 1.016        | 0.977        | 0.947        | 0.986        | 1.002        | 0.989        | 0.983        | 1.024         | 1.020         | 1.074         | H0Y5K5       | ERGIC3    | Endoplasmic reticulum-Golgi intermediate compartment protein 3 (Fragment) |
| 0.970           | 1.013        | 0.972        | 0.999        | 1.004        | 1.007        | 0.979        | 0.987        | 0.971        | 0.986         | 0.990         | 0.960         | P14625       | HSP90B1   | Endoplasmic reticulum chaperone protein 90B1                              |
| 1.157           | 1.090        | 1.192        | 0.936        | 0.900        | 1.139        | 0.939        | 1.032        | 0.895        | 0.984         | 0.958         | 0.935         | Q9UPY3       | DICER1    | Endoribonuclease Dicer                                                    |
| 1.041           | 1.008        | 1.020        | 1.041        | 0.997        | 1.000        | 1.053        | 1.102        | 1.014        | 1.022         | 0.994         | 0.991         | Q53H82       | LACTB2    | Endoribonuclease LACTB2                                                   |
|                 |              |              |              |              |              |              |              |              | 0.891         | 0.971         | 1.207         | Q5D1E8       | ZC3H12A   | Endoribonuclease ZC3H12A                                                  |
| 1.042           | 1.068        | 1.042        | 1.015        | 0.987        | 1.057        | 1.107        | 1.118        | 1.000        | 1.068         | 1.039         | 1.105         | Q96AP7       | ESAM      | Endothelial cell-selective adhesion molecule                              |
| 0.967           | 0.956        | 0.987        | 0.942        | 0.999        | 1.008        | 0.961        | 0.800        | 0.953        | 1.031         | 0.960         | 1.013         | O60869       | EDF1      | Endothelial differentiation-related factor 1                              |
| 0.972           | 0.972        | 1.002        | 0.998        | 0.966        | 1.036        | 1.042        | 1.085        | 1.072        | 1.013         | 1.037         | 1.096         | Q9UNN8       | PROCR     | Endothelial protein C receptor                                            |
| 0.970           | 1.034        | 1.023        | 1.046        | 0.978        | 1.025        | 1.043        | 1.028        | 1.013        | 1.072         | 1.030         | 1.058         | P42892       | ECE1      | Endothelin-converting enzyme 1                                            |
|                 |              |              | 0.830        | 0.924        | 1.191        |              |              |              |               |               |               | O60344       | ECE2      | Endothelin-converting enzyme 2                                            |
| 1.022           | 0.993        | 1.057        | 0.992        | 0.955        | 1.026        | 0.996        | 1.028        | 1.002        | 0.947         | 0.966         | 1.009         | Q96JJ3       | ELMO2     | Engulfment and cell motility protein 2                                    |
| 0.958           | 0.959        | 1.046        | 1.005        | 1.016        | 1.017        | 1.014        | 0.940        | 1.022        | 1.021         | 1.000         | 1.042         | Q96F86       | EDC3      | Enhancer of mRNA-decapping protein 3                                      |
| 0.961           | 0.977        | 1.009        | 0.998        | 0.938        | 1.035        | 0.973        | 0.977        | 1.029        | 0.983         | 0.992         | 1.024         | Q6P2E9       | EDC4      | Enhancer of mRNA-decapping protein 4                                      |
| 1.008           | 0.950        | 1.000        | 1.020        | 0.967        | 0.867        | 0.922        | 0.655        | 0.969        | 0.985         | 0.793         | 1.724         | Q52LR7       | EPC2      | Enhancer of polycomb homolog 2                                            |
| 0.984           | 1.016        | 0.934        | 1.021        | 1.285        | 0.955        | 1.072        | 0.860        | 0.958        | 1.081         | 1.054         | 1.003         | P84090       | ERH       | Enhancer of rudimentary homolog                                           |
| 1.016           | 0.975        | 1.006        | 1.012        | 0.983        | 0.992        | 0.978        | 1.048        | 1.004        | 0.957         | 1.024         | 0.977         | Q9UHY7       | ENOPH1    | Enolase-phosphatase E1                                                    |
| 1.010           | 1.040        | 0.988        | 1.010        | 1.127        | 1.004        | 1.006        | 0.984        | 1.016        | 1.044         | 1.036         | 0.987         | Q9BV79       | MECR      | Enoyl-[acyl-carrier-protein] reductase, mitochondrial                     |
| 0.988           | 1.007        | 0.992        | 0.981        | 1.008        | 1.010        | 0.984        | 0.994        | 0.996        | 1.007         | 1.039         | 0.972         | P42126       | ECI1      | Enoyl-CoA delta isomerase 1, mitochondrial                                |
| 0.933           | 1.007        | 0.999        | 0.951        | 0.967        | 1.016        | 1.007        | 1.012        | 1.004        | 0.990         | 0.981         | 1.034         | O75521       | ECI2      | Enoyl-CoA delta isomerase 2, mitochondrial                                |
|                 |              |              | 1.068        | 1.179        | 0.829        | 1.158        | 1.162        | 0.742        | 1.256         | 0.895         | 1.002         | Q86YB7       | ECHDC2    | Enoyl-CoA hydratase domain-containing protein 2, mitochondrial            |
| 0.995           | 0.987        | 0.992        | 1.003        | 1.193        | 0.980        | 1.016        | 0.894        | 1.066        | 1.014         | 0.996         | 1.015         | P30084       | ECHS1     | Enoyl-CoA hydratase, mitochondrial                                        |
| 0.978           | 1.023        | 1.087        | 1.041        | 1.041        | 1.065        | 1.044        | 0.881        | 1.020        | 1.079         | 1.024         | 1.147         | Q14244       | MAP7      | Ensconsin                                                                 |
| 1.008           | 0.986        | 1.025        | 0.964        | 0.967        | 0.990        | 0.981        | 0.960        | 0.971        | 1.066         | 0.976         | 1.077         | Q92817       | EVPL      | Envoplakin                                                                |
| 1.018           | 0.991        | 1.000        | 1.058        | 0.965        | 1.064        | 1.022        | 1.074        | 1.016        | 0.962         | 1.051         | 0.999         | P29317       | EPHA2     | Ephrin type-A receptor 2                                                  |
| 1.173           | 0.714        | 1.181        | 1.076        | 0.828        | 1.105        |              |              |              | 1.436         | 0.901         | 1.589         | P54753       | EPHB3     | Ephrin type-B receptor 3                                                  |
| 1.342           | 1.016        | 1.050        | 1.097        | 1.247        | 1.003        | 1.126        | 0.955        | 1.092        | 1.114         | 1.057         | 1.027         | P20827       | EFNA1     | Ephrin-A1                                                                 |
| 1.200           | 1.294        | 1.328        | 0.986        | 0.864        | 1.231        | 0.914        | 1.206        | 0.840        |               |               |               | P52803       | EFNA5     | Ephrin-A5                                                                 |

| Abundance Ratio |              |              |              |              |              |              |              |              |               |               |               | Accession ID | Gene name | Protein Description                                                |
|-----------------|--------------|--------------|--------------|--------------|--------------|--------------|--------------|--------------|---------------|---------------|---------------|--------------|-----------|--------------------------------------------------------------------|
| 1 d<br>M1/C1    | 1 d<br>M2/C2 | 1 d<br>M3/C3 | 4 d<br>M1/C1 | 4 d<br>M2/C2 | 4 d<br>M3/C3 | 7 d<br>M1/C1 | 7 d<br>M2/C2 | 7 d<br>M3/C3 | 10 d<br>M1/C1 | 10 d<br>M2/C2 | 10 d<br>M3/C3 |              |           |                                                                    |
| 0.900           | 1.043        | 1.106        | 0.898        | 0.947        | 0.896        | 1.023        | 1.121        | 1.030        | 0.896         | 0.974         | 1.113         | P98172       | EFNB1     | Ephrin-B1                                                          |
|                 |              |              | 1.129        | 1.230        | 0.784        |              |              |              |               |               |               | Q15768       | EFNB3     | Ephrin-B3                                                          |
| 1.033           | 0.994        | 1.017        | 1.025        | 1.001        | 1.020        | 1.046        | 1.068        | 1.017        | 1.056         | 0.959         | 1.072         | Q12929       | EPS8      | Epidermal growth factor receptor kinase substrate 8                |
| 1.000           | 1.009        | 1.023        | 1.012        | 1.012        | 0.993        | 1.012        | 1.022        | 1.000        | 1.011         | 0.990         | 1.014         | Q9H6S3       | EPS8L2    | Epidermal growth factor receptor kinase substrate 8-like protein 2 |
| 1.003           | 0.990        | 1.022        | 1.006        | 1.012        | 1.006        | 1.078        | 1.016        | 1.039        | 1.057         | 1.012         | 1.083         | P00533       | EGFR      | Epidermal growth factor receptor                                   |
| 0.985           | 0.998        | 1.020        | 0.987        | 0.979        | 1.007        | 0.983        | 1.048        | 1.021        | 0.990         | 0.983         | 1.016         | P42566       | EPS15     | Epidermal growth factor receptor substrate 15                      |
| 0.951           | 1.033        | 1.019        | 1.097        | 1.007        | 1.200        | 0.978        | 1.095        | 1.131        |               |               |               | M0QY01       | EPS15L1   | Epidermal growth factor receptor substrate 15-like 1 (Fragment)    |
| 0.898           | 0.932        | 1.036        | 1.059        | 0.747        | 1.257        | 1.058        | 0.992        | 1.042        | 1.070         | 0.958         | 1.036         | Q9UHF1       | EGFL7     | Epidermal growth factor-like protein 7                             |
| 0.925           | 0.937        | 0.978        | 1.008        | 0.899        | 1.135        | 1.092        | 1.024        | 1.011        | 0.996         | 0.992         | 1.245         | G3V145       | SDR16C5   | Epidermal retinol dehydrogenase 2                                  |
| 1.111           | 0.980        | 0.949        | 1.044        | 1.183        | 1.004        | 1.164        | 0.870        | 1.071        | 1.163         | 1.111         | 1.077         | P61916       | NPC2      | Epididymal secretory protein E1                                    |
| 1.125           | 0.958        | 1.033        | 1.052        | 0.998        | 1.040        | 1.026        | 1.062        | 1.038        | 1.096         | 1.036         | 0.980         | Q9Y2E5       | MAN2B2    | Epididymis-specific alpha-mannosidase                              |
|                 |              |              |              |              |              | 0.892        | 1.199        | 0.888        |               |               |               | A0A087X1U6   | EPPK1     | Epiplakin                                                          |
| 0.833           | 0.927        | 0.882        | 1.075        | 0.911        | 1.010        | 1.110        | 1.151        | 1.076        | 1.194         | 1.278         | 1.212         | P54852       | EMP3      | Epithelial membrane protein 3                                      |
| 1.131           | 1.020        | 0.970        | 1.066        | 0.978        | 1.028        | 1.013        | 1.031        | 1.021        | 1.034         | 1.049         | 1.024         | Q7L775       | EPM2AIP1  | EPM2A-interacting protein 1                                        |
| 0.969           | 0.981        | 1.003        | 0.982        | 0.896        | 0.974        | 0.990        | 0.981        | 0.984        | 1.033         | 0.947         | 0.987         | P07099       | EPHX1     | Epoxide hydrolase 1                                                |
| 0.970           | 1.006        | 1.160        | 1.009        | 0.976        | 1.316        | 1.202        | 1.006        | 1.119        | 0.821         | 0.957         | 1.075         | Q8IUS5       | EPHX4     | Epoxide hydrolase 4                                                |
| 1.036           | 1.003        | 1.023        | 1.005        | 1.019        | 1.015        | 0.970        | 1.022        | 1.029        | 0.979         | 1.008         | 0.996         | O95208       | EPN2      | Epsin-2                                                            |
| 1.005           | 1.059        | 0.864        | 1.053        | 1.134        | 0.917        | 0.819        | 1.276        | 1.347        |               |               |               | Q9BV94       | EDEM2     | ER degradation-enhancing alpha-mannosidase-like protein 2          |
| 1.040           | 1.016        | 0.989        | 1.039        | 0.939        | 0.976        | 1.094        | 1.141        | 1.205        | 1.020         | 0.898         | 1.065         | Q9BZQ6       | EDEM3     | ER degradation-enhancing alpha-mannosidase-like protein 3          |
|                 |              |              | 0.952        | 1.238        | 1.403        |              |              |              | 1.714         | 1.147         | 1.290         | P33947       | KDELR2    | ER lumen protein-retaining receptor 2                              |
| 1.151           | 0.991        | 0.869        | 1.093        | 0.907        | 1.193        | 1.009        | 1.311        | 1.009        |               |               |               | O43731       | KDELR3    | ER lumen protein-retaining receptor 3                              |
| 0.985           | 1.012        | 1.019        | 0.995        | 0.962        | 1.016        | 0.983        | 1.075        | 1.006        | 0.964         | 1.019         | 0.984         | Q8N766       | EMC1      | ER membrane protein complex subunit 1                              |
| 0.995           | 0.995        | 0.960        | 0.998        | 0.930        | 0.946        | 1.019        | 1.037        | 0.971        | 1.008         | 0.998         | 1.049         | M0R2A0       | EMC10     | ER membrane protein complex subunit 10                             |
| 1.025           | 1.028        | 0.998        | 1.039        | 0.983        | 1.008        | 0.983        | 1.052        | 1.009        | 0.962         | 1.055         | 0.912         | Q15006       | EMC2      | ER membrane protein complex subunit 2                              |
| 1.080           | 0.974        | 1.007        | 1.031        | 0.917        | 1.062        | 1.042        | 1.173        | 1.008        | 1.033         | 1.117         | 1.040         | Q9P0I2       | EMC3      | ER membrane protein complex subunit 3                              |
| 0.979           | 0.967        | 1.019        | 0.954        | 0.921        | 1.059        | 0.995        | 1.046        | 1.041        | 1.039         | 1.061         | 1.008         | Q5J8M3       | EMC4      | ER membrane protein complex subunit 4                              |
|                 |              |              |              |              |              |              |              |              | 1.169         | 1.104         | 1.153         | Q9BV81       | EMC6      | ER membrane protein complex subunit 6                              |
| 1.054           | 0.874        | 0.956        | 0.990        | 0.977        | 1.017        | 0.999        | 1.000        | 0.980        | 1.014         | 0.916         | 0.956         | Q9NPA0       | EMC7      | ER membrane protein complex subunit 7                              |
| 1.020           | 1.012        | 0.969        | 1.015        | 1.102        | 1.026        | 1.032        | 0.970        | 1.041        | 1.052         | 1.031         | 1.041         | O43402       | EMC8      | ER membrane protein complex subunit 8                              |
|                 |              |              | 0.795        | 0.807        | 0.919        | 0.950        | 1.406        | 0.985        |               |               |               | Q9Y3B6       | EMC9      | ER membrane protein complex subunit 9                              |
| 0.979           | 1.056        | 1.009        | 1.166        | 1.162        | 1.145        | 1.180        | 1.190        | 1.150        | 0.966         | 1.019         | 1.105         | Q9UJM3       | ERRFI1    | ERBB receptor feedback inhibitor 1                                 |

| Abundance Ratio |              |              |              |              |              |              |              |              |               |               |               | Accession ID | Gene name | Protein Description                                        |
|-----------------|--------------|--------------|--------------|--------------|--------------|--------------|--------------|--------------|---------------|---------------|---------------|--------------|-----------|------------------------------------------------------------|
| 1 d<br>M1/C1    | 1 d<br>M2/C2 | 1 d<br>M3/C3 | 4 d<br>M1/C1 | 4 d<br>M2/C2 | 4 d<br>M3/C3 | 7 d<br>M1/C1 | 7 d<br>M2/C2 | 7 d<br>M3/C3 | 10 d<br>M1/C1 | 10 d<br>M2/C2 | 10 d<br>M3/C3 |              |           |                                                            |
|                 |              |              |              |              |              | 0.558        | 1.101        | 1.596        |               |               |               | HOY4B0       | ERI3      | ERI1 exoribonuclease 3 (Fragment)                          |
| 0.915           | 0.952        | 0.926        | 0.966        | 1.027        | 1.048        | 1.012        | 1.058        | 1.025        | 0.989         | 1.021         | 1.020         | O43414       | ERI3      | ERI1 exoribonuclease 3                                     |
| 0.963           | 0.978        | 0.994        | 0.998        | 0.935        | 0.985        | 1.011        | 1.029        | 1.009        | 1.049         | 0.968         | 1.034         | O75477       | ERLIN1    | Erlin-1                                                    |
| 0.983           | 0.993        | 0.992        | 0.997        | 0.985        | 0.999        | 0.986        | 1.025        | 0.971        | 1.043         | 1.006         | 0.975         | O94905       | ERLIN2    | Erlin-2                                                    |
| 0.993           | 1.006        | 1.002        | 0.982        | 0.962        | 1.017        | 0.971        | 0.999        | 0.996        | 0.923         | 0.967         | 0.921         | Q96HE7       | ERO1A     | ERO1-like protein alpha                                    |
| 1.019           | 0.976        | 1.053        | 0.982        | 0.971        | 1.059        | 0.963        | 1.115        | 1.028        | 0.929         | 1.016         | 1.002         | Q86YB8       | ERO1B     | ERO1-like protein beta                                     |
| 0.965           | 0.998        | 0.989        | 1.072        | 0.942        | 1.084        | 1.116        | 1.158        | 1.124        | 1.136         | 1.131         | 1.131         | P27105       | STOM      | Erythrocyte band 7 integral membrane protein               |
| 1.037           | 1.001        | 1.043        | 1.013        | 0.970        | 1.055        | 0.965        | 1.033        | 1.003        | 0.916         | 1.029         | 0.941         | Q9H501       | ESF1      | ESF1 homolog                                               |
|                 |              |              | 1.019        | 1.033        | 1.163        | 0.924        | 0.909        | 1.110        | 1.332         | 0.817         | 1.028         | Q9H4I9       | SMDT1     | Essential MCU regulator, mitochondrial                     |
| 1.042           | 1.038        | 0.977        | 1.021        | 1.060        | 0.959        | 0.984        | 1.066        | 1.040        | 0.956         | 0.975         | 0.959         | Q9H0W9       | C11orf54  | Ester hydrolase C11orf54                                   |
| 1.068           | 1.096        | 1.101        | 0.977        | 0.795        | 0.967        | 1.122        | 1.067        | 0.970        | 1.042         | 0.955         | 1.044         | Q8WZ82       | OVCA2     | Esterase OVCA2                                             |
| 0.946           | 0.986        | 0.956        | 0.966        | 0.864        | 0.983        | 0.966        | 1.022        | 0.963        | 0.909         | 0.977         | 0.929         | Q8NBQ5       | HSD17B11  | Estradiol 17-beta-dehydrogenase 11                         |
| 1.013           | 0.983        | 1.009        | 0.956        | 0.919        | 1.014        | 1.026        | 1.057        | 0.970        | 0.942         | 0.896         | 1.081         | Q9HBU6       | ETNK1     | Ethanolamine kinase 1                                      |
| 1.024           | 0.995        | 0.997        | 0.997        | 0.966        | 1.017        | 1.020        | 1.052        | 1.027        | 1.040         | 1.030         | 1.044         | Q9NTX5       | ECHDC1    | Ethylmalonyl-CoA decarboxylase                             |
| 0.991           | 1.003        | 1.090        | 1.036        | 0.955        | 1.057        | 1.003        | 0.932        | 1.058        | 1.056         | 1.075         | 1.129         | O14681       | EI24      | Etoposide-induced protein 2.4 homolog                      |
| 1.044           | 1.029        | 1.012        | 1.005        | 0.917        | 1.107        | 0.976        | 1.027        | 0.994        | 1.034         | 1.119         | 1.050         | P19419       | ELK1      | ETS domain-containing protein Elk-1                        |
|                 |              |              |              |              |              | 1.056        | 1.065        | 1.099        |               |               |               | P41970       | ELK3      | ETS domain-containing protein Elk-3                        |
| 1.071           | 1.003        | 1.016        | 1.031        | 1.059        | 0.924        | 1.034        | 1.128        | 1.048        | 1.046         | 0.985         | 0.987         | P50548       | ERF       | ETS domain-containing transcription factor ERF             |
| 0.988           | 1.021        | 0.980        | 0.942        | 0.969        | 0.898        | 0.898        | 1.213        | 1.071        | 1.190         | 0.871         | 1.212         | P32519       | ELF1      | ETS-related transcription factor Elf-1                     |
| 0.920           | 1.191        | 1.720        | 1.367        | 0.608        | 0.783        |              |              |              |               |               |               | Q15723       | ELF2      | ETS-related transcription factor Elf-2                     |
| 1.108           | 1.012        | 1.001        | 1.013        | 0.840        | 0.970        | 0.901        | 1.239        | 1.136        |               |               |               | P78545       | ELF3      | ETS-related transcription factor Elf-3                     |
| 1.060           | 0.950        | 1.013        | 0.932        | 0.985        | 1.023        | 0.935        | 0.991        | 1.313        | 0.866         | 0.934         | 1.224         | O00418       | EEF2K     | Eukaryotic elongation factor 2 kinase                      |
| 0.981           | 1.002        | 1.002        | 1.015        | 1.008        | 1.029        | 1.011        | 1.075        | 1.052        | 0.966         | 0.993         | 0.983         | P60842       | EIF4A1    | Eukaryotic initiation factor 4A-I                          |
| 0.996           | 0.981        | 0.979        | 0.985        | 0.965        | 1.010        | 1.015        | 1.053        | 0.995        | 0.966         | 1.015         | 0.992         | P38919       | EIF4A3    | Eukaryotic initiation factor 4A-III                        |
| 0.990           | 0.996        | 1.003        | 0.991        | 1.006        | 1.002        | 1.001        | 1.034        | 1.041        | 0.990         | 0.964         | 1.015         | P62495       | ETF1      | Eukaryotic peptide chain release factor subunit 1          |
| 1.007           | 0.976        | 1.016        | 0.961        | 0.965        | 1.022        | 0.969        | 1.017        | 0.994        | 0.989         | 0.982         | 0.986         | O43324       | EEF1E1    | Eukaryotic translation elongation factor 1 epsilon-1       |
| 1.152           | 1.032        | 0.988        | 1.172        | 1.220        | 1.041        | 1.137        | 0.910        | 1.241        | 1.030         | 1.198         | 1.002         | K7EM18       | EIF1      | Eukaryotic translation initiation factor 1                 |
| 1.010           | 0.997        | 0.987        | 0.979        | 0.996        | 0.993        | 1.003        | 0.954        | 0.965        | 1.002         | 0.960         | 0.998         | P47813       | EIF1AX    | Eukaryotic translation initiation factor 1A, X-chromosomal |
|                 |              |              | 1.289        | 2.089        | 0.874        | 1.314        | 0.613        | 1.458        | 0.954         | 1.097         | 1.049         | O60739       | EIF1B     | Eukaryotic translation initiation factor 1b                |
| 0.995           | 1.016        | 0.989        | 1.011        | 0.993        | 0.993        | 1.013        | 1.050        | 0.980        | 1.001         | 1.003         | 0.999         | P05198       | EIF2S1    | Eukaryotic translation initiation factor 2 subunit 1       |
| 1.006           | 0.988        | 0.992        | 1.015        | 1.090        | 0.973        | 1.033        | 0.928        | 0.990        | 1.016         | 0.994         | 1.016         | P20042       | EIF2S2    | Eukaryotic translation initiation factor 2 subunit 2       |



| Abundance Ratio |              |              |              |              |              |              |              |              |               |               |               | Accession ID | Gene name | Protein Description                                           |
|-----------------|--------------|--------------|--------------|--------------|--------------|--------------|--------------|--------------|---------------|---------------|---------------|--------------|-----------|---------------------------------------------------------------|
| 1 d<br>M1/C1    | 1 d<br>M2/C2 | 1 d<br>M3/C3 | 4 d<br>M1/C1 | 4 d<br>M2/C2 | 4 d<br>M3/C3 | 7 d<br>M1/C1 | 7 d<br>M2/C2 | 7 d<br>M3/C3 | 10 d<br>M1/C1 | 10 d<br>M2/C2 | 10 d<br>M3/C3 |              |           |                                                               |
| 1.013           | 1.008        | 0.969        | 1.018        | 1.146        | 0.974        | 1.020        | 0.979        | 1.035        | 1.023         | 1.011         | 0.994         | P41091       | EIF2S3    | Eukaryotic translation initiation factor 2 subunit 3          |
| 1.017           | 1.004        | 0.997        | 1.003        | 0.982        | 0.957        | 0.996        | 1.073        | 0.995        | 0.994         | 0.989         | 1.016         | Q9BY44       | EIF2A     | Eukaryotic translation initiation factor 2A                   |
|                 |              |              |              |              |              |              |              |              | 1.116         | 0.911         | 0.963         | Q9NZJ5       | EIF2AK3   | Eukaryotic translation initiation factor 2-alpha kinase 3     |
| 1.020           | 0.999        | 1.044        | 1.087        | 0.965        | 1.061        | 1.065        | 0.956        | 1.044        | 1.116         | 1.024         | 1.131         | P41214       | EIF2D     | Eukaryotic translation initiation factor 2D                   |
| 0.969           | 1.009        | 1.011        | 1.003        | 1.032        | 1.024        | 1.002        | 0.941        | 1.010        | 1.020         | 1.018         | 1.037         | Q14152       | EIF3A     | Eukaryotic translation initiation factor 3 subunit A          |
| 0.994           | 1.007        | 1.023        | 1.013        | 1.055        | 1.027        | 1.017        | 0.961        | 1.022        | 1.035         | 1.025         | 1.051         | Q99613       | EIF3C     | Eukaryotic translation initiation factor 3 subunit C          |
| 0.972           | 1.008        | 0.987        | 1.031        | 1.013        | 1.001        | 1.028        | 1.050        | 0.982        | 1.032         | 1.042         | 0.997         | O15371       | EIF3D     | Eukaryotic translation initiation factor 3 subunit D          |
| 0.985           | 1.011        | 0.973        | 1.002        | 0.988        | 1.024        | 1.012        | 1.088        | 1.005        | 0.993         | 1.011         | 1.003         | P60228       | EIF3E     | Eukaryotic translation initiation factor 3 subunit E          |
| 1.017           | 1.028        | 0.999        | 1.027        | 1.011        | 1.033        | 1.061        | 1.083        | 1.019        | 0.999         | 1.029         | 1.005         | O00303       | EIF3F     | Eukaryotic translation initiation factor 3 subunit F          |
| 1.009           | 1.006        | 1.014        | 1.020        | 1.034        | 1.022        | 1.001        | 1.026        | 1.043        | 1.004         | 1.031         | 1.026         | O75821       | EIF3G     | Eukaryotic translation initiation factor 3 subunit G          |
| 0.983           | 1.000        | 1.006        | 1.004        | 0.978        | 1.014        | 0.995        | 1.021        | 1.010        | 0.996         | 1.045         | 1.068         | B3KS98       | EIF3S3    | Eukaryotic translation initiation factor 3 subunit H          |
| 0.972           | 0.985        | 0.986        | 1.013        | 0.993        | 1.034        | 1.004        | 1.024        | 1.018        | 0.987         | 0.996         | 1.020         | Q13347       | EIF3I     | Eukaryotic translation initiation factor 3 subunit I          |
| 1.002           | 0.994        | 0.974        | 0.984        | 0.965        | 0.963        | 1.019        | 0.992        | 0.972        | 1.057         | 1.057         | 1.073         | O75822       | EIF3J     | Eukaryotic translation initiation factor 3 subunit J          |
| 1.021           | 0.982        | 1.009        | 1.006        | 1.047        | 1.044        | 0.989        | 0.987        | 1.019        | 0.984         | 1.019         | 1.031         | Q9UBQ5       | EIF3K     | Eukaryotic translation initiation factor 3 subunit K          |
| 1.016           | 1.008        | 1.010        | 1.009        | 0.976        | 1.019        | 1.018        | 1.085        | 1.011        | 0.995         | 1.052         | 0.972         | B0QY89       | EIF3L     | Eukaryotic translation initiation factor 3 subunit L          |
| 1.077           | 1.029        | 1.047        | 1.045        | 1.163        | 1.008        | 0.991        | 1.040        | 1.091        | 0.923         | 1.024         | 0.929         | Q7L2H7       | EIF3M     | Eukaryotic translation initiation factor 3 subunit M          |
| 0.992           | 0.993        | 1.010        | 1.006        | 0.975        | 1.017        | 1.013        | 1.022        | 1.009        | 0.981         | 1.006         | 1.015         | D3DQV9       | EIF4G2    | Eukaryotic translation initiation factor 4 gamma 2 (Fragment) |
| 1.467           | 1.100        | 1.413        |              |              |              |              |              |              |               |               |               | A0A0A0MSA7   | EIF4G3    | Eukaryotic translation initiation factor 4 gamma 3            |
| 1.015           | 0.994        | 1.030        | 1.000        | 0.959        | 1.015        | 0.989        | 0.971        | 0.994        | 1.043         | 0.960         | 1.050         | A0A0U1RQK7   | EIF4G3    | Eukaryotic translation initiation factor 4 gamma 3            |
| 0.986           | 0.997        | 0.984        | 0.989        | 0.998        | 0.991        | 0.988        | 0.904        | 0.986        | 1.058         | 1.047         | 1.084         | E7EX17       | EIF4B     | Eukaryotic translation initiation factor 4B                   |
| 1.004           | 1.009        | 0.976        | 0.995        | 1.024        | 0.993        | 0.988        | 1.016        | 0.988        | 0.987         | 1.008         | 0.963         | D6RBW1       | EIF4E     | Eukaryotic translation initiation factor 4E                   |
| 1.007           | 0.992        | 0.990        | 0.983        | 0.972        | 0.969        | 0.952        | 1.056        | 1.015        | 1.031         | 1.005         | 1.077         | O60573       | EIF4E2    | Eukaryotic translation initiation factor 4E type 2            |

| Abundance Ratio |              |              |              |              |              |              |              |              |               |               |               | Accession ID | Gene name | Protein Description                                                            |
|-----------------|--------------|--------------|--------------|--------------|--------------|--------------|--------------|--------------|---------------|---------------|---------------|--------------|-----------|--------------------------------------------------------------------------------|
| 1 d<br>M1/C1    | 1 d<br>M2/C2 | 1 d<br>M3/C3 | 4 d<br>M1/C1 | 4 d<br>M2/C2 | 4 d<br>M3/C3 | 7 d<br>M1/C1 | 7 d<br>M2/C2 | 7 d<br>M3/C3 | 10 d<br>M1/C1 | 10 d<br>M2/C2 | 10 d<br>M3/C3 |              |           |                                                                                |
|                 |              |              | 0.721        | 1.000        | 1.314        |              |              |              |               |               |               | Q13541       | EIF4EBP1  | Eukaryotic translation initiation factor 4E-binding protein 1                  |
| 1.066           | 1.039        | 1.045        |              |              |              |              |              |              |               |               |               | Q13542       | EIF4EBP2  | Eukaryotic translation initiation factor 4E-binding protein 2                  |
| 1.023           | 1.022        | 1.018        | 1.023        | 1.087        | 1.024        | 1.038        | 0.984        | 1.034        | 0.944         | 0.958         | 1.021         | P55010       | EIF5      | Eukaryotic translation initiation factor 5                                     |
| 0.914           | 0.962        | 0.992        | 0.933        | 0.913        | 0.994        | 1.037        | 0.984        | 1.063        | 1.078         | 0.954         | 1.079         | Q9GZV4       | EIF5A2    | Eukaryotic translation initiation factor 5A-2                                  |
| 1.011           | 1.013        | 1.010        | 1.017        | 1.023        | 0.994        | 1.031        | 1.007        | 1.007        | 1.024         | 1.009         | 1.058         | A0A087WUT6   | EIF5B     | Eukaryotic translation initiation factor 5B                                    |
| 0.995           | 0.980        | 1.013        | 1.010        | 1.228        | 0.991        | 1.059        | 0.941        | 1.073        | 0.993         | 1.005         | 0.996         | P56537       | EIF6      | Eukaryotic translation initiation factor 6                                     |
| 0.982           | 1.018        | 1.014        | 1.052        | 0.993        | 1.028        | 1.004        | 1.146        | 0.995        | 1.030         | 1.008         | 0.995         | Q9BQ95       | ECSIT     | Evolutionarily conserved signaling intermediate in Toll pathway, mitochondrial |
| 1.043           | 1.024        | 1.025        | 1.046        | 1.181        | 1.018        | 1.060        | 0.960        | 1.077        | 0.976         | 0.994         | 1.033         | Q9NV70       | EXOC1     | Exocyst complex component 1                                                    |
| 1.007           | 1.017        | 1.023        | 0.985        | 0.979        | 1.039        | 0.997        | 1.044        | 1.018        | 0.967         | 0.991         | 1.002         | Q96KP1       | EXOC2     | Exocyst complex component 2                                                    |
| 1.004           | 1.011        | 1.056        | 1.030        | 0.980        | 1.025        | 1.031        | 1.040        | 1.013        | 1.051         | 0.987         | 1.026         | O60645       | EXOC3     | Exocyst complex component 3                                                    |
| 1.025           | 1.010        | 1.017        | 1.004        | 0.970        | 1.040        | 1.016        | 1.023        | 1.034        | 1.015         | 1.007         | 1.048         | Q96A65       | EXOC4     | Exocyst complex component 4                                                    |
| 1.009           | 1.012        | 1.013        | 1.002        | 1.028        | 1.023        | 1.005        | 0.988        | 0.984        | 1.032         | 0.986         | 1.030         | O00471       | EXOC5     | Exocyst complex component 5                                                    |
| 1.074           | 1.012        | 1.053        | 1.005        | 0.955        | 1.035        | 1.049        | 1.067        | 1.026        | 1.001         | 1.016         | 0.976         | Q8TAG9       | EXOC6     | Exocyst complex component 6                                                    |
| 1.005           | 1.012        | 1.010        | 0.999        | 0.985        | 0.966        | 0.975        | 1.080        | 1.000        | 1.007         | 0.991         | 0.999         | Q9UPT5       | EXOC7     | Exocyst complex component 7                                                    |
| 1.016           | 1.003        | 1.014        | 1.013        | 0.931        | 1.030        | 1.003        | 0.973        | 1.027        | 1.070         | 0.979         | 1.035         | Q8IYI6       | EXOC8     | Exocyst complex component 8                                                    |
| 1.029           | 0.991        | 1.028        | 1.022        | 0.953        | 1.041        | 1.016        | 0.996        | 1.019        | 1.009         | 0.997         | 1.026         | A0A0U1RRB6   | EXOC6B    | Exocyst complex component                                                      |
| 0.946           | 0.966        | 1.048        | 0.967        | 1.012        | 1.011        | 1.017        | 0.992        | 1.008        | 1.037         | 0.973         | 1.078         | Q9NVH0       | EXD2      | Exonuclease 3'-5' domain-containing protein 2                                  |
| 0.930           | 0.928        | 1.067        | 0.984        | 0.931        | 1.015        | 1.000        | 0.986        | 1.004        | 0.983         | 1.004         | 1.074         | Q86TP1       | PRUNE1    | Exopolyphosphatase PRUNE1                                                      |
| 1.060           | 0.992        | 1.017        | 0.978        | 0.986        | 0.988        | 0.959        | 0.982        | 0.999        | 0.964         | 1.018         | 1.010         | Q9Y3B2       | EXOSC1    | Exosome complex component CSL4                                                 |
| 0.959           | 0.995        | 0.987        | 1.031        | 1.031        | 1.038        | 1.009        | 0.954        | 1.027        | 1.035         | 0.989         | 1.024         | Q5RKV6       | EXOSC6    | Exosome complex component MTR3                                                 |
| 0.984           | 0.992        | 0.979        | 1.009        | 0.988        | 0.999        | 0.987        | 1.081        | 0.959        | 0.974         | 1.010         | 1.080         | Q13868       | EXOSC2    | Exosome complex component RRP4                                                 |
| 1.048           | 0.990        | 0.987        | 0.981        | 0.942        | 0.995        | 1.004        | 1.058        | 1.004        | 0.967         | 0.965         | 0.988         | Q9NQT5       | EXOSC3    | Exosome complex component RRP40                                                |
| 1.004           | 1.020        | 1.030        | 1.005        | 0.891        | 1.043        | 1.001        | 1.084        | 0.993        | 0.967         | 0.999         | 0.971         | Q9NPD3       | EXOSC4    | Exosome complex component RRP41                                                |
| 0.964           | 0.977        | 0.995        | 0.974        | 0.955        | 1.046        | 0.960        | 0.921        | 1.004        | 0.995         | 0.975         | 1.042         | Q15024       | EXOSC7    | Exosome complex component RRP42                                                |
| 1.012           | 0.984        | 0.984        | 0.983        | 0.965        | 1.007        | 0.993        | 1.026        | 1.032        | 0.996         | 0.994         | 1.040         | Q96B26       | EXOSC8    | Exosome complex component RRP43                                                |
| 1.000           | 0.953        | 0.979        | 0.979        | 0.982        | 1.012        | 0.978        | 1.014        | 1.022        | 0.976         | 0.994         | 1.016         | Q9NQT4       | EXOSC5    | Exosome complex component RRP46                                                |
| 1.011           | 1.002        | 1.002        | 1.000        | 0.949        | 0.981        | 0.992        | 1.037        | 0.990        | 0.968         | 0.971         | 1.032         | Q9Y2L1       | DIS3      | Exosome complex exonuclease RRP44                                              |
| 0.977           | 0.994        | 1.003        | 0.999        | 0.970        | 1.019        | 1.000        | 1.021        | 1.006        | 0.986         | 0.995         | 1.029         | Q01780       | EXOSC10   | Exosome component 10                                                           |
| 1.028           | 1.034        | 0.993        | 0.885        | 0.912        | 1.006        | 0.882        | 1.194        | 1.107        | 1.002         | 0.963         | 1.081         | Q16394       | EXT1      | Exostosin-1                                                                    |
| 1.015           | 1.046        | 1.029        | 1.216        | 0.948        | 1.068        | 1.022        | 0.780        | 1.052        | 1.101         | 0.975         | 1.049         | Q9UBQ6       | EXTL2     | Exostosin-like 2                                                               |
| 1.131           | 1.087        | 1.138        | 0.894        | 0.958        | 0.950        | 0.978        | 1.166        | 0.911        |               |               |               | O43909       | EXTL3     | Exostosin-like 3                                                               |
| 0.994           | 1.014        | 0.992        | 0.997        | 0.974        | 1.016        | 0.979        | 1.065        | 1.018        | 0.941         | 1.013         | 0.935         | O14980       | XPO1      | Exportin-1                                                                     |

| Abundance Ratio |              |              |              |              |              |              |              |              |               |               |               | Accession ID | Gene name | Protein Description                                        |
|-----------------|--------------|--------------|--------------|--------------|--------------|--------------|--------------|--------------|---------------|---------------|---------------|--------------|-----------|------------------------------------------------------------|
| 1 d<br>M1/C1    | 1 d<br>M2/C2 | 1 d<br>M3/C3 | 4 d<br>M1/C1 | 4 d<br>M2/C2 | 4 d<br>M3/C3 | 7 d<br>M1/C1 | 7 d<br>M2/C2 | 7 d<br>M3/C3 | 10 d<br>M1/C1 | 10 d<br>M2/C2 | 10 d<br>M3/C3 |              |           |                                                            |
| 1.004           | 0.999        | 1.003        | 1.009        | 0.981        | 1.020        | 1.047        | 1.086        | 1.047        | 0.973         | 1.016         | 1.013         | P55060       | CSE1L     | Exportin-2                                                 |
| 1.026           | 1.007        | 1.035        | 1.025        | 0.941        | 1.046        | 1.005        | 1.055        | 1.037        | 0.952         | 1.021         | 0.981         | Q9C0E2       | XPO4      | Exportin-4                                                 |
| 0.989           | 0.998        | 1.027        | 0.991        | 0.989        | 1.073        | 1.013        | 1.097        | 1.059        | 0.961         | 1.050         | 0.998         | Q9HAV4       | XPO5      | Exportin-5                                                 |
| 1.059           | 0.948        | 1.132        | 0.991        | 1.001        | 1.150        | 1.162        | 1.024        | 1.207        | 0.904         | 0.916         | 1.154         | Q96QU8       | XPO6      | Exportin-6                                                 |
| 1.029           | 0.994        | 0.990        | 1.018        | 0.940        | 1.055        | 1.005        | 1.045        | 0.996        | 1.003         | 1.056         | 1.003         | E7ESC6       | XPO7      | Exportin-7                                                 |
| 1.068           | 0.984        | 0.993        | 1.107        | 0.945        | 1.055        | 1.041        | 1.074        | 1.060        | 0.927         | 0.986         | 0.953         | O43592       | XPOT      | Exportin-T                                                 |
| 0.978           | 0.993        | 0.998        | 0.997        | 0.973        | 1.009        | 1.030        | 1.052        | 1.023        | 1.035         | 0.983         | 0.996         | Q9BSJ8       | ESYT1     | Extended synaptotagmin-1                                   |
| 1.028           | 1.084        | 1.005        | 1.032        | 1.012        | 0.957        | 1.019        | 1.118        | 0.984        | 1.036         | 1.066         | 1.086         | Q99504       | EYA3      | Eyes absent homolog 3                                      |
| 0.988           | 1.008        | 1.000        | 1.005        | 0.997        | 1.003        | 0.977        | 0.995        | 1.001        | 0.984         | 1.026         | 0.984         | E7EQR4       | EZR       | Ezrin                                                      |
| 0.976           | 1.009        | 0.983        | 1.006        | 1.019        | 0.999        | 1.016        | 1.029        | 0.999        | 0.995         | 1.002         | 1.005         | Q9Y5B9       | SUPT16H   | FACT complex subunit SPT16                                 |
| 1.024           | 1.004        | 1.012        | 0.994        | 0.990        | 0.988        | 0.981        | 1.023        | 1.004        | 0.961         | 0.979         | 0.974         | Q08945       | SSRP1     | FACT complex subunit SSRP1                                 |
| 1.029           | 1.034        | 1.003        | 1.010        | 1.144        | 0.950        | 1.005        | 1.008        | 1.031        | 0.973         | 1.013         | 0.993         | P52907       | CAPZA1    | F-actin-capping protein subunit alpha-1                    |
| 1.013           | 0.985        | 0.986        | 0.985        | 0.974        | 0.948        | 0.983        | 1.054        | 1.010        | 0.964         | 1.006         | 0.977         | P47755       | CAPZA2    | F-actin-capping protein subunit alpha-2                    |
| 0.977           | 1.012        | 1.028        | 0.959        | 0.966        | 1.026        | 0.997        | 0.987        | 1.027        | 0.986         | 0.973         | 1.044         | Q5VZK9       | CARMIL1   | F-actin-uncapping protein LRRC16A                          |
| 1.087           | 1.060        | 1.053        | 0.996        | 0.970        | 1.022        | 0.976        | 1.045        | 1.006        | 0.957         | 0.936         | 1.025         | P23610       | F8A1      | Factor VIII intron 22 protein                              |
| 1.053           | 1.010        | 1.060        | 1.003        | 1.001        | 1.038        | 1.028        | 1.130        | 1.086        | 1.041         | 0.963         | 1.050         | Q8NFF5       | FLAD1     | FAD synthase                                               |
| 0.985           | 1.022        | 1.010        | 1.011        | 0.983        | 1.042        | 1.039        | 1.024        | 1.035        | 1.055         | 1.008         | 1.032         | Q96CU9       | FOXRED1   | FAD-dependent oxidoreductase domain-containing protein 1   |
| 0.988           | 1.031        | 1.039        | 1.132        | 0.863        | 0.946        | 1.058        | 0.840        | 0.993        | 1.003         | 1.005         | 1.002         | P55789       | GFER      | FAD-linked sulfhydryl oxidase ALR                          |
| 0.987           | 1.021        | 1.071        |              |              |              | 0.976        | 1.000        | 0.926        | 1.084         | 1.210         | 0.980         | D3DWX8       | FAM3A     | Family with sequence similarity 3, member A, isoform CRA_c |
| 0.841           | 1.031        | 1.379        | 0.974        | 0.954        | 1.067        |              |              |              |               |               |               | Q0VG06       | FAAP100   | Fanconi anemia core complex-associated protein 100         |
| 1.012           | 0.993        | 1.116        | 0.832        | 0.975        | 1.022        | 0.886        | 0.954        | 0.857        | 0.814         | 0.934         | 0.944         | O15360       | FANCA     | Fanconi anemia group A protein                             |
| 0.971           | 0.950        | 0.932        | 0.855        | 1.024        | 0.983        |              |              |              |               |               |               | O15287       | FANCG     | Fanconi anemia group G protein                             |
| 1.022           | 1.032        | 1.027        | 1.033        | 0.950        | 0.947        | 1.051        | 1.207        | 1.064        | 0.882         | 0.941         | 0.868         | Q9NVI1       | FANCI     | Fanconi anemia group I protein                             |
| 0.986           | 0.997        | 0.984        | 1.004        | 0.998        | 0.989        | 0.999        | 0.958        | 0.962        | 1.006         | 1.005         | 1.019         | Q96AE4       | FUBP1     | Far upstream element-binding protein 1                     |
| 1.004           | 0.990        | 1.006        | 0.968        | 1.003        | 1.006        | 0.991        | 0.927        | 0.996        | 1.002         | 1.025         | 1.047         | Q92945       | KHSRP     | Far upstream element-binding protein 2                     |
| 1.005           | 1.004        | 1.009        | 0.996        | 1.010        | 1.024        | 0.994        | 0.996        | 1.012        | 1.005         | 1.046         | 1.034         | Q96I24       | FUBP3     | Far upstream element-binding protein 3                     |
| 0.972           | 0.997        | 0.974        | 0.997        | 0.967        | 0.990        | 1.060        | 1.080        | 1.024        | 1.108         | 1.093         | 1.062         | P14324       | FDPS      | Farnesyl pyrophosphate synthase                            |
| 0.915           | 1.017        | 0.948        | 0.957        | 0.951        | 1.010        | 1.044        | 0.990        | 0.906        | 0.813         | 1.041         | 0.912         | Q13158       | FADD      | FAS-associated death domain protein                        |
| 1.006           | 0.980        | 1.022        | 0.979        | 0.984        | 1.024        | 0.994        | 1.004        | 1.035        | 1.007         | 1.006         | 1.042         | Q9UNN5       | FAF1      | FAS-associated factor 1                                    |
| 0.980           | 0.962        | 1.016        | 1.032        | 0.939        | 1.005        | 0.999        | 0.954        | 0.962        | 0.989         | 1.013         | 0.966         | Q96CS3       | FAF2      | FAS-associated factor 2                                    |
| 0.999           | 1.078        | 1.099        | 1.102        | 0.881        | 1.382        | 1.196        | 1.210        | 1.251        | 0.895         | 1.042         | 1.126         | Q99689       | FEZ1      | Fasciculation and elongation protein zeta-1                |
| 1.013           | 0.994        | 0.984        | 0.976        | 1.010        | 0.959        | 0.979        | 1.002        | 0.989        | 0.958         | 0.974         | 0.970         | Q16658       | FSCN1     | Fascin                                                     |

| Abundance Ratio |              |              |              |              |              |              |              |              |               |               |               | Accession ID | Gene name | Protein Description                                     |
|-----------------|--------------|--------------|--------------|--------------|--------------|--------------|--------------|--------------|---------------|---------------|---------------|--------------|-----------|---------------------------------------------------------|
| 1 d<br>M1/C1    | 1 d<br>M2/C2 | 1 d<br>M3/C3 | 4 d<br>M1/C1 | 4 d<br>M2/C2 | 4 d<br>M3/C3 | 7 d<br>M1/C1 | 7 d<br>M2/C2 | 7 d<br>M3/C3 | 10 d<br>M1/C1 | 10 d<br>M2/C2 | 10 d<br>M3/C3 |              |           |                                                         |
| 1.082           | 0.987        | 1.058        | 0.994        | 0.910        | 1.018        | 0.992        | 1.020        | 1.012        | 0.967         | 0.994         | 0.996         | Q53R41       | FASTKD1   | FAST kinase domain-containing protein 1, mitochondrial  |
| 0.985           | 1.026        | 0.978        | 1.019        | 0.897        | 1.041        | 0.982        | 0.928        | 1.050        | 0.934         | 0.955         | 1.083         | Q9NYY8       | FASTKD2   | FAST kinase domain-containing protein 2, mitochondrial  |
| 1.011           | 1.059        | 1.085        | 1.045        | 0.883        | 1.060        | 1.147        | 1.102        | 1.271        | 0.989         | 1.049         | 1.153         | Q14CZ7       | FASTKD3   | FAST kinase domain-containing protein 3, mitochondrial  |
| 1.023           | 0.989        | 0.997        | 0.961        | 0.914        | 1.006        | 1.016        | 1.007        | 0.988        | 0.989         | 0.944         | 1.005         | Q7L8L6       | FASTKD5   | FAST kinase domain-containing protein 5, mitochondrial  |
| 0.872           | 1.083        | 0.942        | 1.025        | 0.863        | 0.984        | 1.024        | 1.066        | 0.976        | 0.919         | 1.032         | 1.042         | Q8N6M3       | FITM2     | Fat storage-inducing transmembrane protein 2            |
| 1.040           | 1.003        | 1.062        | 1.099        | 1.028        | 0.926        | 1.059        | 1.001        | 1.041        | 1.038         | 1.080         | 1.118         | A0A0A0MR51   | FADS1     | Fatty acid desaturase 1                                 |
| 0.908           | 0.984        | 1.015        | 1.002        | 0.879        | 0.969        | 1.075        | 1.096        | 0.969        | 1.059         | 1.052         | 1.009         | Q9Y5Q0       | FADS3     | Fatty acid desaturase 3                                 |
| 0.953           | 1.006        | 1.012        | 1.014        | 1.022        | 1.000        | 1.053        | 1.063        | 1.051        | 1.025         | 1.032         | 1.063         | P49327       | FASN      | Fatty acid synthase                                     |
| 1.105           | 0.992        | 1.019        | 1.046        | 1.296        | 0.921        | 1.020        | 0.918        | 1.025        | 0.924         | 1.037         | 0.931         | Q01469       | FABP5     | Fatty acid-binding protein, epidermal                   |
| 1.091           | 0.965        | 1.000        | 1.011        | 1.005        | 1.049        | 1.049        | 1.197        | 1.081        | 1.054         | 1.008         | 1.120         | Q8WVX9       | FAR1      | Fatty acyl-CoA reductase 1                              |
|                 |              |              | 2.702        | 5.240        | 1.934        | 4.825        | 9.136        | 1.301        |               |               |               | J3KTD9       | ALDH3A2   | Fatty aldehyde dehydrogenase (Fragment)                 |
| 1.028           | 0.995        | 1.015        | 0.980        | 0.962        | 1.014        | 1.005        | 0.923        | 1.026        | 0.977         | 0.964         | 1.099         | Q86WN1       | FCHSD1    | F-BAR and double SH3 domains protein 1                  |
| 0.995           | 0.975        | 1.025        | 1.026        | 1.024        | 1.044        | 1.069        | 1.093        | 1.038        | 1.056         | 0.994         | 1.071         | E9PG19       | FCHSD2    | F-BAR and double SH3 domains protein 2                  |
| 1.007           | 0.998        | 1.015        | 1.023        | 0.976        | 0.979        | 0.989        | 1.023        | 0.988        | 1.023         | 0.970         | 1.052         | Q0JRZ9       | FCHO2     | F-BAR domain only protein 2                             |
| 0.941           | 0.990        | 0.982        | 0.953        | 0.908        | 1.066        | 1.004        | 1.044        | 1.023        | 1.035         | 1.068         | 1.054         | J3KTA1       | FBXL20    | F-box and leucine-rich repeat protein 20, isoform CRA_a |
| 1.191           | 0.987        | 1.017        | 1.128        | 0.904        | 1.015        | 1.001        | 1.086        | 0.932        | 1.496         | 0.889         | 1.089         | Q96EF6       | FBXO17    | F-box only protein 17                                   |
| 0.947           | 0.964        | 0.999        | 0.996        | 1.025        | 0.995        | 1.011        | 1.024        | 1.075        | 0.985         | 0.973         | 0.980         | Q9UK22       | FBXO2     | F-box only protein 2                                    |
| 0.990           | 1.150        | 1.120        | 1.005        | 1.018        | 1.019        | 1.130        | 1.343        | 1.032        | 1.033         | 0.986         | 1.048         | O94952       | FBXO21    | F-box only protein 21                                   |
| 0.962           | 0.974        | 0.983        | 0.979        | 0.951        | 0.994        | 1.005        | 1.155        | 1.001        | 0.997         | 0.983         | 1.042         | Q8NEZ5       | FBXO22    | F-box only protein 22                                   |
| 1.202           | 1.115        | 1.312        |              |              |              | 1.262        | 0.948        | 0.965        | 1.056         | 1.049         | 1.109         | Q9NVF7       | FBXO28    | F-box only protein 28                                   |
| 1.123           | 1.026        | 1.042        | 0.996        | 1.060        | 0.979        | 0.920        | 1.077        | 1.204        | 1.014         | 0.965         | 1.006         | Q9UK99       | FBXO3     | F-box only protein 3                                    |
| 0.972           | 0.992        | 1.033        | 0.919        | 1.062        | 1.062        | 1.072        | 1.013        | 1.029        | 0.957         | 0.976         | 1.032         | Q8TB52       | FBXO30    | F-box only protein 30                                   |
|                 |              |              |              |              |              |              |              |              | 0.900         | 1.015         | 0.917         | Q8NEA4       | FBXO36    | F-box only protein 36                                   |
| 0.990           | 0.969        | 0.983        | 1.000        | 0.970        | 0.922        | 1.054        | 1.080        | 0.910        | 1.150         | 0.999         | 0.970         | Q9UKT5       | FBXO4     | F-box only protein 4                                    |
| 1.075           | 1.108        | 0.876        | 0.633        | 1.265        | 1.057        | 1.167        | 0.765        | 2.203        |               |               |               | B7Z1P2       | FBXO44    | F-box only protein 44                                   |
| 0.836           | 1.193        | 1.145        | 0.981        | 0.988        | 1.105        | 1.046        | 0.931        | 1.044        |               |               |               | Q6PJ61       | FBXO46    | F-box only protein 46                                   |
| 1.025           | 0.904        | 0.734        |              |              |              |              |              |              |               |               |               | Q9UKT4       | FBXO5     | F-box only protein 5                                    |
| 1.035           | 1.074        | 0.981        | 1.018        | 0.974        | 1.011        | 0.978        | 1.040        | 0.971        | 1.068         | 1.051         | 1.032         | Q9NRD1       | FBXO6     | F-box only protein 6                                    |
| 1.011           | 1.016        | 1.020        | 0.947        | 0.942        | 1.019        | 1.034        | 1.113        | 1.072        | 0.985         | 1.012         | 1.009         | Q9Y3I1       | FBXO7     | F-box only protein 7                                    |
| 1.084           | 1.101        | 1.069        | 1.056        | 1.077        | 1.043        | 1.035        | 1.144        | 0.933        | 1.125         | 1.017         | 1.077         | Q9NXX8       | FBXL12    | F-box/LRR-repeat protein 12                             |
|                 |              |              | 1.079        | 0.821        | 0.862        | 0.936        | 1.045        | 1.064        | 1.030         | 1.046         | 1.039         | Q9H469       | FBXL15    | F-box/LRR-repeat protein 15                             |

| Abundance Ratio |              |              |              |              |              |              |              |              |               |               |               | Accession ID | Gene name | Protein Description                                                |
|-----------------|--------------|--------------|--------------|--------------|--------------|--------------|--------------|--------------|---------------|---------------|---------------|--------------|-----------|--------------------------------------------------------------------|
| 1 d<br>M1/C1    | 1 d<br>M2/C2 | 1 d<br>M3/C3 | 4 d<br>M1/C1 | 4 d<br>M2/C2 | 4 d<br>M3/C3 | 7 d<br>M1/C1 | 7 d<br>M2/C2 | 7 d<br>M3/C3 | 10 d<br>M1/C1 | 10 d<br>M2/C2 | 10 d<br>M3/C3 |              |           |                                                                    |
| 1.139           | 0.995        | 1.050        | 0.968        | 0.886        | 1.006        | 1.026        | 1.113        | 0.925        | 1.068         | 1.100         | 1.000         | Q8N461       | FBXL16    | F-box/LRR-repeat protein 16                                        |
| 0.799           | 0.955        | 1.025        |              |              |              |              |              |              |               |               |               | Q9UKT7       | FBXL3     | F-box/LRR-repeat protein 3                                         |
| 0.922           | 1.226        | 1.088        | 1.084        | 0.949        | 0.948        | 0.734        | 1.194        | 1.259        |               |               |               | Q8N531       | FBXL6     | F-box/LRR-repeat protein 6                                         |
| 1.142           | 1.090        | 1.048        | 1.060        | 0.937        | 0.936        | 0.959        | 1.117        | 0.971        | 0.927         | 1.033         | 0.936         | Q96CD0       | FBXL8     | F-box/LRR-repeat protein 8                                         |
|                 |              |              |              |              |              |              |              |              | 1.089         | 1.084         | 1.222         | P0C2W1       | FBXO45    | F-box/SPRY domain-containing protein 1                             |
| 1.069           | 0.973        | 1.090        | 1.262        | 1.163        | 1.034        | 0.925        | 1.061        | 1.214        | 1.062         | 0.865         | 0.897         | Q9UKB1       | FBXW11    | F-box/WD repeat-containing protein 11                              |
|                 |              |              | 1.226        | 1.175        | 0.857        | 1.009        | 0.915        | 1.096        | 0.994         | 1.103         | 1.072         | Q9UKT8       | FBXW2     | F-box/WD repeat-containing protein 2                               |
|                 |              |              | 0.927        | 0.921        | 0.966        |              |              |              |               |               |               | Q969U6       | FBXW5     | F-box/WD repeat-containing protein 5                               |
| 0.996           | 0.984        | 0.986        | 0.980        | 0.965        | 0.954        | 0.994        | 1.019        | 0.985        | 1.076         | 1.043         | 1.077         | Q9BZK7       | TBL1XR1   | F-box-like/WD repeat-containing protein TBL1XR1                    |
| 1.103           | 0.949        | 0.971        | 0.969        | 1.023        | 0.990        | 1.007        | 1.064        | 1.063        | 1.016         | 0.856         | 1.035         | Q9P2Q2       | FRMD4A    | FERM domain-containing protein 4A                                  |
| 0.987           | 0.999        | 1.001        | 1.008        | 0.996        | 1.138        | 1.083        | 0.999        | 1.022        | 1.041         | 0.998         | 1.073         | Q9BZ67       | FRMD8     | FERM domain-containing protein 8                                   |
| 0.999           | 1.009        | 1.019        | 0.987        | 0.979        | 0.988        | 0.987        | 0.988        | 0.990        | 1.037         | 0.997         | 1.040         | Q9Y4F1       | FARP1     | FERM, RhoGEF and pleckstrin domain-containing protein 1            |
| 0.907           | 1.167        | 1.085        | 1.024        | 1.028        | 1.027        |              |              |              | 1.032         | 0.922         | 1.137         | H7C3M7       | FARP2     | FERM, RhoGEF and pleckstrin domain-containing protein 2 (Fragment) |
| 1.022           | 1.065        | 1.033        | 1.044        | 0.942        | 0.998        | 1.100        | 1.010        | 1.087        | 1.001         | 0.953         | 1.097         | O94887       | FARP2     | FERM, RhoGEF and pleckstrin domain-containing protein 2            |
| 1.001           | 1.011        | 1.009        | 1.000        | 0.969        | 1.008        | 1.006        | 1.047        | 0.996        | 0.961         | 0.975         | 1.005         | Q9BQL6       | FERMT1    | Fermitin family homolog 1                                          |
| 1.080           | 1.001        | 0.958        | 1.084        | 0.973        | 1.076        | 1.011        | 1.139        | 1.117        | 1.071         | 1.046         | 1.070         | Q6P4F2       | FDX2      | Ferredoxin-2, mitochondrial                                        |
| 2.395           | 2.405        | 2.294        | 3.035        | 3.329        | 2.707        | 3.112        | 2.866        | 3.000        | 2.724         | 2.618         | 2.629         | P02794       | FTH1      | Ferritin heavy chain                                               |
| 2.440           | 2.264        | 2.250        | 2.887        | 3.215        | 2.724        | 2.926        | 2.848        | 2.807        | 2.627         | 2.482         | 2.533         | P02792       | FTL       | Ferritin light chain                                               |
|                 |              |              | 1.054        | 1.009        | 1.101        | 1.056        | 0.971        | 0.981        | 0.986         | 0.934         | 1.018         | Q9NVK5       | FGFR1OP2  | FGFR1 oncogene partner 2                                           |
| 0.989           | 0.962        | 1.000        | 0.995        | 0.975        | 0.946        | 0.995        | 0.990        | 0.945        | 0.998         | 0.927         | 1.129         | O95684       | FGFR1OP   | FGFR1 oncogene partner                                             |
| 0.964           | 1.026        | 1.015        | 0.994        | 0.955        | 0.987        | 1.035        | 0.970        | 1.053        | 0.972         | 0.961         | 1.119         | Q9Y613       | FHOD1     | FH1/FH2 domain-containing protein 1                                |
| 0.987           | 1.003        | 0.934        | 1.033        | 0.948        | 1.015        | 0.994        | 1.025        | 0.943        | 0.916         | 0.961         | 0.976         | A0A087WUF6   | FGF2      | Fibroblast growth factor                                           |
|                 |              |              | 1.043        | 0.827        | 0.864        |              |              |              |               |               |               | Q8WU20       | FRS2      | Fibroblast growth factor receptor substrate 2                      |
| 1.039           | 0.964        | 1.019        | 1.072        | 1.014        | 1.006        | 1.065        | 1.193        | 0.919        | 1.167         | 0.940         | 1.279         | P02751       | FN1       | Fibronectin                                                        |
| 1.037           | 1.020        | 1.051        | 0.974        | 0.921        | 0.995        | 0.985        | 0.957        | 1.065        | 0.971         | 0.979         | 1.102         | Q9BTV5       | FSD1      | Fibronectin type III and SPRY domain-containing protein 1          |
| 0.974           | 0.997        | 1.048        | 1.004        | 0.905        | 0.997        | 1.002        | 1.123        | 1.032        | 0.966         | 0.956         | 0.930         | Q53EP0       | FNDC3B    | Fibronectin type III domain-containing protein 3B                  |
| 1.069           | 1.037        | 1.016        | 1.026        | 0.937        | 1.112        | 1.059        | 0.992        | 0.999        | 1.111         | 1.019         | 1.126         | Q9Y2H6       | FNDC3A    | Fibronectin type-III domain-containing protein 3A                  |
| 0.908           | 0.967        | 0.859        | 0.941        | 0.888        | 1.151        | 1.239        | 1.153        | 1.047        | 1.332         | 0.972         | 1.345         | Q9HCM7       | FBRSL1    | Fibrosin-1-like protein                                            |
|                 |              |              |              |              |              |              |              |              | 0.912         | 1.562         | 1.274         | O75636       | FCN3      | Ficolin-3                                                          |
| 1.233           | 0.813        | 1.005        |              |              |              | 1.002        | 1.220        | 0.934        |               |               |               | Q5HY92       | FIGN      | Fidgetin                                                           |
| 0.909           | 0.975        | 0.875        |              |              |              | 0.982        | 0.951        | 1.053        | 1.271         | 0.889         | 0.849         | Q5D862       | FLG2      | Filaggrin-2                                                        |

| Abundance Ratio |              |              |              |              |              |              |              |              |               |               |               | Accession ID | Gene name | Protein Description                        |
|-----------------|--------------|--------------|--------------|--------------|--------------|--------------|--------------|--------------|---------------|---------------|---------------|--------------|-----------|--------------------------------------------|
| 1 d<br>M1/C1    | 1 d<br>M2/C2 | 1 d<br>M3/C3 | 4 d<br>M1/C1 | 4 d<br>M2/C2 | 4 d<br>M3/C3 | 7 d<br>M1/C1 | 7 d<br>M2/C2 | 7 d<br>M3/C3 | 10 d<br>M1/C1 | 10 d<br>M2/C2 | 10 d<br>M3/C3 |              |           |                                            |
|                 |              |              |              |              |              | 0.991        | 0.674        | 0.902        |               |               |               | Q4L180       | FILIP1L   | Filamin A-interacting protein 1-like       |
| 0.898           | 0.999        | 0.872        | 0.747        | 1.106        | 1.084        | 0.981        | 0.972        | 1.126        | 1.374         | 1.087         | 1.370         | HOY5F3       | FLNA      | Filamin-A (Fragment)                       |
| 0.981           | 1.006        | 0.983        | 0.997        | 1.044        | 0.947        | 0.995        | 0.968        | 0.981        | 0.984         | 0.976         | 0.976         | P21333       | FLNA      | Filamin-A                                  |
| 0.841           | 0.993        | 0.882        | 0.922        | 0.940        | 0.841        | 0.954        | 1.151        | 0.918        | 0.828         | 0.986         | 0.978         | O75369       | FLNB      | Filamin-B                                  |
| 0.990           | 1.018        | 0.968        | 0.984        | 1.021        | 0.916        | 1.046        | 0.964        | 0.919        | 0.993         | 0.967         | 1.017         | Q8WUP2       | FBLIM1    | Filamin-binding LIM protein 1              |
| 1.107           | 1.114        | 1.193        | 1.081        | 0.881        | 0.959        |              |              |              | 0.922         | 0.982         | 1.056         | Q9UIM3       | FKBPL     | FK506-binding protein-like                 |
| 0.994           | 0.995        | 1.004        | 0.962        | 0.948        | 0.958        | 0.967        | 1.026        | 0.973        | 0.942         | 0.970         | 1.016         | P39748       | FEN1      | Flap endonuclease 1                        |
| 0.970           | 0.982        | 0.998        | 0.999        | 0.963        | 0.991        | 0.998        | 1.059        | 1.043        | 0.994         | 1.004         | 1.031         | P30043       | BLVRB     | Flavin reductase (NADPH)                   |
| 0.986           | 0.966        | 0.989        | 1.019        | 0.942        | 1.021        | 1.123        | 0.978        | 1.084        | 1.088         | 1.053         | 1.252         | O75955       | FLOT1     | Flotillin-1                                |
| 0.999           | 1.000        | 1.002        | 1.024        | 0.923        | 1.028        | 1.099        | 1.052        | 1.106        | 1.093         | 1.089         | 1.080         | E7EMK3       | FLOT2     | Flotillin-2                                |
| 1.032           | 1.029        | 0.988        | 0.991        | 0.939        | 0.979        | 0.974        | 0.942        | 0.922        | 0.967         | 1.022         | 0.985         | Q96CP2       | FLYWCH2   | FLYWCH family member 2                     |
| 1.016           | 1.042        | 1.018        | 1.064        | 1.000        | 0.986        | 0.989        | 1.148        | 1.010        | 1.012         | 1.045         | 1.002         | Q5VW36       | FOCAD     | Focadhesin                                 |
| 1.009           | 1.000        | 1.006        | 1.008        | 1.021        | 0.995        | 1.022        | 1.003        | 0.990        | 1.007         | 1.010         | 0.987         | E7ESA6       | PTK2      | Focal adhesion kinase 1                    |
|                 |              |              | 0.799        | 1.524        | 1.623        | 1.253        | 1.081        | 1.206        |               |               |               | P41440       | SLC19A1   | Folate transporter 1                       |
| 0.925           | 0.976        | 1.069        | 1.007        | 0.944        | 1.043        | 0.980        | 1.085        | 1.020        | 0.982         | 0.995         | 0.955         | Q8NFG4       | FLCN      | Folliculin                                 |
|                 |              |              |              |              |              | 0.767        | 1.279        | 1.240        |               |               |               | Q8TF40       | FNIP1     | Folliculin-interacting protein 1           |
|                 |              |              |              |              |              |              |              |              | 1.131         | 0.996         | 1.089         | O95633       | FSTL3     | Follistatin-related protein 3              |
| 1.044           | 1.007        | 1.008        | 0.954        | 0.901        | 1.057        | 1.005        | 1.100        | 1.026        | 0.987         | 1.028         | 1.015         | Q05932       | FPGS      | Folylpolyglutamate synthase, mitochondrial |
| 0.986           | 0.979        | 0.946        | 1.011        | 1.187        | 1.077        | 1.064        | 0.907        | 1.143        | 1.096         | 1.063         | 0.900         | Q99958       | FOXC2     | Forkhead box protein C2                    |
| 0.789           | 1.096        | 0.970        | 1.002        | 1.089        | 1.244        | 0.988        | 1.280        | 1.071        | 1.194         | 1.519         | 1.547         | O75593       | FOXH1     | Forkhead box protein H1                    |
| 1.012           | 0.903        | 0.975        | 0.998        | 1.621        | 1.079        | 1.049        | 0.949        | 1.079        | 1.184         | 1.003         | 1.181         | Q9UPW0       | FOXJ3     | Forkhead box protein J3                    |
| 1.002           | 1.019        | 1.011        | 1.009        | 0.980        | 1.011        | 0.981        | 0.990        | 1.008        | 0.989         | 1.024         | 1.048         | P85037       | FO XK1    | Forkhead box protein K1                    |
| 1.048           | 0.960        | 1.040        | 0.974        | 0.926        | 0.956        | 1.011        | 1.076        | 1.000        | 0.991         | 1.097         | 1.040         | Q01167       | FO XK2    | Forkhead box protein K2                    |
| 1.056           | 1.036        | 0.905        |              |              |              |              |              |              | 0.932         | 1.035         | 1.250         | O43524       | FOXO3     | Forkhead box protein O3                    |
| 1.033           | 1.009        | 0.908        |              |              |              |              |              |              |               |               |               | A0A087X299   | FOXP1     | Forkhead box protein P1                    |
|                 |              |              | 1.121        | 0.960        | 1.233        |              |              |              |               |               |               | Q8IVH2       | FOXP4     | Forkhead box protein P4                    |
| 0.997           | 0.969        | 1.027        | 0.967        | 0.944        | 0.977        | 1.022        | 0.992        | 0.964        | 1.070         | 0.934         | 1.080         | Q96RU3       | FNBP1     | Formin-binding protein 1                   |
| 0.974           | 0.981        | 1.000        | 1.016        | 0.957        | 1.054        | 1.047        | 0.969        | 0.976        | 1.042         | 1.011         | 1.060         | Q8IVF7       | FMNL3     | Formin-like protein 3                      |
|                 |              |              |              |              |              | 1.091        | 1.073        | 0.929        | 0.987         | 0.964         | 0.995         | P15407       | FOSL1     | Fos-related antigen 1                      |
| 0.973           | 0.967        | 1.008        | 0.919        | 0.944        | 0.955        | 0.954        | 0.919        | 0.931        | 0.877         | 1.097         | 1.025         | P15408       | FOSL2     | Fos-related antigen 2                      |
| 1.076           | 1.050        | 1.010        | 1.027        | 1.125        | 0.911        | 1.161        | 0.821        | 0.983        | 1.044         | 0.936         | 1.030         | A0A0A0MSG2   | FHL2      | Four and a half LIM domains protein 2      |
| 1.160           | 1.096        | 1.039        | 1.036        | 0.984        | 0.992        | 0.988        | 0.994        | 0.950        | 1.043         | 0.925         | 1.031         | Q13643       | FHL3      | Four and a half LIM domains protein 3      |
| 1.022           | 0.787        | 0.945        |              |              |              |              |              |              | 0.920         | 1.105         | 1.032         | Q86VR8       | FJX1      | Four-jointed box protein 1                 |

| Abundance Ratio |              |              |              |              |              |              |              |              |               |               |               | Accession ID | Gene name | Protein Description                                        |
|-----------------|--------------|--------------|--------------|--------------|--------------|--------------|--------------|--------------|---------------|---------------|---------------|--------------|-----------|------------------------------------------------------------|
| 1 d<br>M1/C1    | 1 d<br>M2/C2 | 1 d<br>M3/C3 | 4 d<br>M1/C1 | 4 d<br>M2/C2 | 4 d<br>M3/C3 | 7 d<br>M1/C1 | 7 d<br>M2/C2 | 7 d<br>M3/C3 | 10 d<br>M1/C1 | 10 d<br>M2/C2 | 10 d<br>M3/C3 |              |           |                                                            |
| 1.019           | 1.002        | 0.996        | 1.003        | 0.975        | 1.002        | 1.003        | 1.004        | 1.006        | 1.014         | 1.032         | 1.019         | P51114       | FXR1      | Fragile X mental retardation syndrome-related protein 1    |
| 0.987           | 1.005        | 1.013        | 0.990        | 0.966        | 0.968        | 0.979        | 0.979        | 0.968        | 1.071         | 1.056         | 1.081         | P51116       | FXR2      | Fragile X mental retardation syndrome-related protein 2    |
| 1.036           | 0.982        | 0.990        | 1.120        | 0.986        | 1.007        | 1.055        | 1.028        | 0.954        | 1.175         | 0.983         | 1.030         | Q16595       | FXN       | Frataxin, mitochondrial                                    |
| 0.875           | 0.927        | 0.786        | 1.050        | 1.041        | 1.047        | 1.232        | 1.110        | 1.042        | 1.311         | 1.038         | 1.105         | F5H450       | FZD10     | Frizzled-10                                                |
| 0.943           | 0.974        | 1.101        | 0.857        | 0.924        | 1.153        | 1.196        | 0.924        | 0.997        | 1.114         | 1.116         | 1.162         | O60353       | FZD6      | Frizzled-6                                                 |
| 1.002           | 0.989        | 1.069        | 1.006        | 1.008        | 1.013        | 0.968        | 0.916        | 1.035        | 1.016         | 0.996         | 1.004         | Q9H479       | FN3K      | Fructosamine-3-kinase                                      |
| 1.049           | 0.997        | 0.967        | 0.972        | 0.947        | 1.010        | 0.994        | 1.094        | 1.004        | 0.994         | 0.979         | 1.003         | Q9NQ88       | TIGAR     | Fructose-2,6-bisphosphatase TIGAR                          |
| 1.033           | 1.010        | 1.025        | 0.953        | 0.913        | 1.007        | 0.999        | 1.073        | 1.020        | 0.974         | 0.999         | 1.070         | P09972       | ALDOC     | Fructose-bisphosphate aldolase C                           |
| 1.055           | 1.204        | 1.183        | 0.955        | 0.972        | 1.092        | 1.053        | 0.967        | 1.050        | 0.941         | 0.932         | 1.095         | A2VDF0       | FUOM      | Fucose mutarotase                                          |
| 1.031           | 0.985        | 1.028        | 0.959        | 0.983        | 1.003        | 1.044        | 1.083        | 1.032        | 0.983         | 1.005         | 0.938         | A0A0A0MRP2   | FPGT      | Fucose-1-phosphate guanylyltransferase                     |
| 0.925           | 1.068        | 0.984        |              |              |              |              |              |              | 1.063         | 0.990         | 0.924         | O75072       | FKTN      | Fukutin                                                    |
| 1.054           | 0.943        | 1.107        | 0.950        | 0.752        | 0.791        | 1.019        | 1.121        | 0.959        | 0.948         | 0.848         | 1.099         | Q9H9S5       | FKRP      | Fukutin-related protein                                    |
| 0.973           | 1.003        | 0.994        | 0.984        | 0.971        | 0.993        | 0.992        | 1.033        | 0.981        | 1.008         | 1.010         | 1.003         | P07954       | FH        | Fumarate hydratase, mitochondrial                          |
| 1.042           | 1.040        | 0.966        | 1.006        | 1.025        | 1.011        | 1.012        | 1.067        | 1.046        | 0.978         | 0.980         | 0.979         | P16930       | FAH       | Fumarylacetoacetase                                        |
| 1.018           | 0.998        | 0.994        | 1.014        | 1.138        | 0.982        | 1.009        | 0.976        | 1.049        | 1.077         | 0.976         | 0.982         | Q96GK7       | FAHD2A    | Fumarylacetoacetate hydrolase domain-containing protein 2A |
| 1.104           | 0.959        | 1.126        | 0.920        | 0.994        | 1.129        | 0.922        | 1.150        | 1.047        | 1.024         | 0.999         | 1.000         | Q6P2I3       | FAHD2B    | Fumarylacetoacetate hydrolase domain-containing protein 2B |
| 0.984           | 0.943        | 1.054        | 1.055        | 1.084        | 1.139        | 1.108        | 1.113        | 1.080        | 1.041         | 1.071         | 1.090         | Q8IVP5       | FUNDC1    | FUN14 domain-containing protein 1                          |
| 0.966           | 0.968        | 1.011        | 0.996        | 0.925        | 1.061        | 1.023        | 1.000        | 1.006        | 1.033         | 1.036         | 1.049         | Q9BWH2       | FUNDC2    | FUN14 domain-containing protein 2                          |
| 0.987           | 0.995        | 1.226        |              |              |              | 0.989        | 0.958        | 0.939        |               |               |               | P98174       | FGD1      | FYVE, RhoGEF and PH domain-containing protein 1            |
| 0.940           | 1.091        | 1.027        | 1.029        | 0.947        | 1.022        | 1.125        | 1.030        | 1.028        | 1.078         | 0.991         | 1.042         | F8VWL3       | FGD4      | FYVE, RhoGEF and PH domain-containing protein 4            |
| 1.036           | 1.036        | 1.036        | 1.006        | 0.926        | 0.999        | 1.022        | 1.130        | 1.011        | 0.981         | 0.966         | 1.080         | Q6ZV73       | FGD6      | FYVE, RhoGEF and PH domain-containing protein 6            |
| 1.050           | 1.022        | 0.989        | 1.024        | 0.969        | 0.952        | 1.015        | 1.066        | 0.969        | 1.019         | 1.020         | 1.060         | Q92917       | GPKOW     | G patch domain and KOW motifs-containing protein           |
| 1.070           | 1.007        | 1.083        | 1.010        | 0.930        | 1.088        | 0.989        | 0.863        | 0.949        | 0.999         | 0.929         | 1.156         | Q9BRR8       | GPATCH1   | G patch domain-containing protein 1                        |
| 1.075           | 0.963        | 1.030        | 0.860        | 0.999        | 0.909        | 0.972        | 1.185        | 1.078        | 0.959         | 1.044         | 0.983         | A0A0A0MSF9   | GPATCH11  | G patch domain-containing protein 11                       |
| 1.005           | 1.029        | 0.945        |              |              |              | 0.987        | 0.895        | 0.930        |               |               |               | Q9NW75       | GPATCH2   | G patch domain-containing protein 2                        |
| 1.026           | 1.007        | 1.031        | 1.014        | 0.980        | 0.962        | 0.963        | 0.988        | 0.977        | 0.995         | 1.010         | 1.052         | Q9UKJ3       | GPATCH8   | G patch domain-containing protein 8                        |
| 1.071           | 0.994        | 1.014        | 0.999        | 0.917        | 0.985        | 1.043        | 1.014        | 1.052        | 0.974         | 0.954         | 1.011         | I3L3Y9       | GPS2      | G protein pathway suppressor 2 (Fragment)                  |
| 0.945           | 0.979        | 1.013        | 1.010        | 0.978        | 1.045        | 1.031        | 0.937        | 0.978        | 1.081         | 1.033         | 1.156         | Q722K8       | GPRIN1    | G protein-regulated inducer of neurite outgrowth 1         |



| Abundance Ratio |              |              |              |              |              |              |              |              |               |               |               | Accession ID | Gene name | Protein Description                                                 |
|-----------------|--------------|--------------|--------------|--------------|--------------|--------------|--------------|--------------|---------------|---------------|---------------|--------------|-----------|---------------------------------------------------------------------|
| 1 d<br>M1/C1    | 1 d<br>M2/C2 | 1 d<br>M3/C3 | 4 d<br>M1/C1 | 4 d<br>M2/C2 | 4 d<br>M3/C3 | 7 d<br>M1/C1 | 7 d<br>M2/C2 | 7 d<br>M3/C3 | 10 d<br>M1/C1 | 10 d<br>M2/C2 | 10 d<br>M3/C3 |              |           |                                                                     |
| 1.265           | 1.059        | 0.954        | 1.110        | 0.942        | 1.118        | 1.028        | 1.177        | 0.978        | 1.067         | 0.974         | 0.988         | P24385       | CCND1     | G1/S-specific cyclin-D1                                             |
| 0.903           | 0.965        | 1.054        |              |              |              | 0.831        | 1.280        | 0.811        | 0.978         | 0.793         | 1.134         | Q9NYZ3       | GTSE1     | G2 and S phase-expressed protein 1                                  |
| 0.973           | 1.043        | 1.039        | 1.001        | 0.991        | 0.975        | 0.987        | 1.136        | 1.005        | 0.860         | 0.822         | 1.068         | P14635       | CCNB1     | G2/mitotic-specific cyclin-B1                                       |
| 0.876           | 1.034        | 1.112        | 1.044        | 0.805        | 0.898        | 0.970        | 1.329        | 1.045        | 0.707         | 1.148         | 0.724         | O95067       | CCNB2     | G2/mitotic-specific cyclin-B2                                       |
| 0.999           | 1.002        | 1.008        | 1.049        | 1.018        | 1.001        | 1.046        | 1.034        | 0.928        | 1.035         | 1.017         | 0.982         | Q06546       | GABPA     | GA-binding protein alpha chain                                      |
| 0.962           | 0.929        | 1.023        | 0.960        | 1.054        | 0.999        | 0.928        | 0.813        | 0.919        | 0.901         | 1.062         | 0.952         | Q06547       | GABPB1    | GA-binding protein subunit beta-1                                   |
| 1.076           | 0.931        | 1.000        | 1.117        | 0.885        | 1.010        | 1.407        | 0.785        | 0.975        | 1.426         | 0.850         | 1.104         | P07902       | GALT      | Galactose-1-phosphate uridylyltransferase                           |
| 0.969           | 1.061        | 1.060        | 0.965        | 0.930        | 1.018        | 0.972        | 1.065        | 1.052        | 1.010         | 1.034         | 1.091         | O94766       | B3GAT3    | Galactosylgalactosylxylosylprotein 3-beta-glucuronosyltransferase 3 |
| 1.023           | 1.028        | 0.983        | 1.007        | 1.047        | 0.992        | 1.009        | 0.989        | 1.010        | 1.011         | 1.031         | 1.021         | P09382       | LGALS1    | Galectin-1                                                          |
| 1.093           | 1.015        | 1.065        | 1.057        | 1.029        | 1.002        | 0.929        | 0.919        | 0.999        | 0.869         | 1.016         | 0.856         | P17931       | LGALS3    | Galectin-3                                                          |
| 0.974           | 1.090        | 1.032        | 1.010        | 0.932        | 1.025        | 1.194        | 0.993        | 1.066        | 1.048         | 0.971         | 1.218         | Q08380       | LGALS3BP  | Galectin-3-binding protein                                          |
| 1.133           | 1.009        | 1.013        | 1.019        | 1.010        | 0.980        | 1.107        | 0.945        | 1.078        | 0.998         | 0.954         | 0.981         | Q3ZCW2       | LGALSL    | Galectin-related protein                                            |
|                 |              |              | 0.980        | 0.902        | 0.980        |              |              |              | 1.006         | 1.094         | 1.114         | Q9H3C7       | GGNBP2    | Gametogenetin-binding protein 2                                     |
| 0.978           | 1.008        | 0.980        | 1.001        | 0.995        | 1.009        | 1.067        | 0.954        | 0.955        | 1.132         | 1.016         | 1.078         | Q9UEY8       | ADD3      | Gamma-adducin                                                       |
| 1.059           | 1.038        | 0.999        | 1.048        | 1.014        | 0.953        | 1.017        | 1.023        | 0.967        | 1.052         | 1.083         | 0.957         | O95166       | GABARAP   | Gamma-aminobutyric acid receptor-associated protein                 |
| 1.003           | 0.997        | 0.935        | 1.048        | 0.969        | 1.016        | 1.050        | 1.108        | 1.035        | 1.065         | 1.044         | 1.071         | P60520       | GABARAPL2 | Gamma-aminobutyric acid receptor-associated protein-like 2          |
| 1.120           | 1.008        | 1.074        | 1.002        | 1.005        | 0.971        | 1.001        | 0.983        | 0.999        | 0.956         | 0.933         | 0.982         | P09104       | ENO2      | Gamma-enolase                                                       |
| 1.056           | 1.005        | 1.001        | 1.001        | 0.944        | 0.936        | 0.964        | 1.018        | 0.962        | 0.993         | 1.008         | 0.954         | Q92820       | GGH       | Gamma-glutamyl hydrolase                                            |
| 0.690           | 0.975        | 1.159        |              |              |              | 0.909        | 1.233        | 0.989        | 0.992         | 1.010         | 0.945         | Q9BVM4       | GGACT     | Gamma-glutamylaminocyclotransferase                                 |
| 0.989           | 1.003        | 0.986        | 0.972        | 1.002        | 0.987        | 0.988        | 0.970        | 1.010        | 0.988         | 1.005         | 0.994         | O75223       | GGCT      | Gamma-glutamylcyclotransferase                                      |
| 0.970           | 1.072        | 0.988        | 1.040        | 1.013        | 0.994        | 1.091        | 1.084        | 1.045        | 1.099         | 0.997         | 1.059         | Q9UJ14       | GGT7      | Gamma-glutamyltransferase 7                                         |
| 1.134           | 1.041        | 1.083        | 0.967        | 0.994        | 1.088        | 1.084        | 1.071        | 1.043        |               |               |               | P19440       | GGT1      | Gamma-glutamyltranspeptidase 1                                      |
| 0.976           | 1.084        | 0.979        | 0.947        | 0.931        | 0.973        | 1.048        | 0.651        | 0.964        | 1.100         | 0.937         | 1.080         | P13284       | IFI30     | Gamma-interferon-inducible lysosomal thiol reductase                |
| 1.053           | 0.998        | 1.032        | 1.013        | 1.025        | 1.053        | 0.944        | 0.936        | 1.048        | 0.991         | 0.917         | 1.065         | Q16666       | IFI16     | Gamma-interferon-inducible protein 16                               |
| 1.085           | 0.947        | 1.126        |              |              |              | 1.214        | 0.896        | 1.022        | 1.548         | 1.084         | 1.102         | Q96BI3       | APH1A     | Gamma-secretase subunit APH-1A                                      |
|                 |              |              |              |              |              |              |              |              | 1.094         | 0.954         | 0.947         | Q8WW43       | APH1B     | Gamma-secretase subunit APH-1B                                      |
|                 |              |              | 0.841        | 0.637        | 1.410        | 0.976        | 0.988        | 1.390        |               |               |               | Q9NZ42       | PSENN     | Gamma-secretase subunit PEN-2                                       |
| 0.965           | 1.004        | 1.018        | 1.049        | 0.991        | 1.020        | 1.023        | 1.006        | 1.009        | 1.017         | 0.986         | 1.031         | Q99747       | NAPG      | Gamma-soluble NSF attachment protein                                |
| 1.003           | 1.014        | 1.019        | 0.992        | 1.009        | 1.051        | 1.022        | 1.018        | 1.005        | 1.034         | 1.024         | 1.077         | Q9NUQ3       | TXLNG     | Gamma-taxilin                                                       |
| 0.992           | 0.980        | 1.009        | 1.026        | 0.962        | 1.016        | 1.040        | 1.109        | 1.028        | 0.970         | 0.964         | 0.989         | Q96CW5       | TUBGCP3   | Gamma-tubulin complex component 3                                   |
| 1.080           | 0.978        | 1.002        | 1.028        | 0.946        | 0.959        | 0.965        | 1.132        | 1.097        | 0.863         | 1.052         | 0.905         | Q9UGJ1       | TUBGCP4   | Gamma-tubulin complex component 4                                   |

| Abundance Ratio |              |              |              |              |              |              |              |              |               |               |               | Accession ID | Gene name | Protein Description                                          |
|-----------------|--------------|--------------|--------------|--------------|--------------|--------------|--------------|--------------|---------------|---------------|---------------|--------------|-----------|--------------------------------------------------------------|
| 1 d<br>M1/C1    | 1 d<br>M2/C2 | 1 d<br>M3/C3 | 4 d<br>M1/C1 | 4 d<br>M2/C2 | 4 d<br>M3/C3 | 7 d<br>M1/C1 | 7 d<br>M2/C2 | 7 d<br>M3/C3 | 10 d<br>M1/C1 | 10 d<br>M2/C2 | 10 d<br>M3/C3 |              |           |                                                              |
| 1.181           | 1.134        | 0.900        | 0.948        | 0.859        | 1.019        | 0.946        | 0.974        | 1.068        | 0.837         | 0.797         | 1.088         | Q96RT7       | TUBGCP6   | Gamma-tubulin complex component 6                            |
|                 |              |              | 1.049        | 0.905        | 1.288        |              |              |              |               |               |               | A0A087X1Z1   | TUBGCP5   | Gamma-tubulin complex component                              |
| 1.005           | 0.980        | 0.959        | 0.982        | 0.951        | 0.988        | 0.997        | 1.000        | 0.948        | 1.032         | 0.996         | 0.998         | P17900       | GM2A      | Ganglioside GM2 activator                                    |
| 0.984           | 0.998        | 1.072        | 0.998        | 0.915        | 1.079        | 1.060        | 0.962        | 0.974        | 0.987         | 0.999         | 1.008         | Q8TB36       | GDAP1     | Ganglioside-induced differentiation-associated protein 1     |
| 1.076           | 0.979        | 1.018        | 0.989        | 0.943        | 1.049        | 1.065        | 1.074        | 0.979        | 1.044         | 1.000         | 1.044         | Q9NXN4       | GDAP2     | Ganglioside-induced differentiation-associated protein 2     |
|                 |              |              | 0.976        | 0.933        | 1.023        |              |              |              |               |               |               | P17302       | GJA1      | Gap junction alpha-1 protein                                 |
|                 |              |              | 0.947        | 0.891        | 1.265        | 1.178        | 1.546        | 0.902        |               |               |               | P36383       | GJC1      | Gap junction gamma-1 protein                                 |
| 0.931           | 1.061        | 1.162        | 1.001        | 1.003        | 1.116        | 1.060        | 0.999        | 0.901        | 1.019         | 1.101         | 1.034         | A0A5E8       | GAS2L1    | GAS2-like protein 1                                          |
| 1.092           | 0.989        | 1.059        | 0.972        | 0.903        | 0.971        | 1.002        | 1.121        | 1.004        | 1.107         | 0.985         | 1.130         | G3V1A6       | GSDMD     | Gasdermin domain containing 1, isoform CRA_d                 |
| 1.058           | 1.084        | 1.096        | 0.955        | 0.947        | 1.005        | 0.825        | 1.138        | 1.061        | 0.916         | 0.998         | 1.040         | Q8WUU5       | GATAD1    | GATA zinc finger domain-containing protein 1                 |
| 0.936           | 0.964        | 1.032        | 0.962        | 0.984        | 1.067        | 1.060        | 1.024        | 0.884        | 1.046         | 0.983         | 0.984         | D4PHA4       | GPBP1     | GC-rich promoter binding protein 1, isoform CRA_c            |
| 1.004           | 1.017        | 0.998        | 0.960        | 0.955        | 0.982        | 1.036        | 1.046        | 1.015        | 0.986         | 0.987         | 1.054         | P16383       | GCFC2     | GC-rich sequence DNA-binding factor 2                        |
| 1.046           | 0.987        | 1.003        | 1.045        | 0.950        | 1.041        | 1.038        | 1.082        | 0.973        | 1.001         | 0.990         | 1.016         | R4GMU1       | H6PD      | GDH/6PGL endoplasmic bifunctional protein                    |
| 1.030           | 0.994        | 1.045        | 1.073        | 0.929        | 0.999        | 1.017        | 0.977        | 1.007        | 0.925         | 1.144         | 0.897         | Q6ZNW5       | GDPGP1    | GDP-D-glucose phosphorylase 1                                |
| 0.984           | 1.009        | 0.986        | 1.001        | 0.983        | 0.998        | 0.994        | 1.060        | 0.976        | 0.948         | 1.007         | 0.958         | Q9H488       | POFUT1    | GDP-fucose protein O-fucosyltransferase 1                    |
| 1.001           | 0.996        | 1.008        | 0.983        | 0.940        | 1.008        | 0.974        | 1.021        | 1.011        | 0.970         | 0.955         | 1.006         | Q9Y2G5       | POFUT2    | GDP-fucose protein O-fucosyltransferase 2                    |
| 1.020           | 1.008        | 0.992        | 0.997        | 1.013        | 0.991        | 1.019        | 1.059        | 1.000        | 0.999         | 0.994         | 1.017         | Q13630       | TSTA3     | GDP-L-fucose synthase                                        |
| 1.038           | 0.992        | 1.045        | 0.996        | 0.906        | 0.985        | 1.013        | 0.948        | 0.967        | 1.001         | 0.924         | 1.028         | Q2TAA5       | ALG11     | GDP-Man:Man(3)GlcNAc(2)-PP-Dol alpha-1,2-mannosyltransferase |
| 0.966           | 0.995        | 1.001        | 1.026        | 1.070        | 1.013        | 1.038        | 1.013        | 0.997        | 1.009         | 0.988         | 1.011         | O60547       | GMDS      | GDP-mannose 4,6 dehydratase                                  |
| 0.994           | 0.982        | 0.996        | 0.991        | 0.991        | 0.964        | 0.983        | 0.902        | 0.974        | 1.026         | 0.930         | 0.996         | P06396       | GSN       | Gelsolin                                                     |
| 0.897           | 1.059        | 0.996        | 0.949        | 0.853        | 1.083        | 1.038        | 0.989        | 1.000        | 1.147         | 1.001         | 1.090         | O14893       | GEMIN2    | Gem-associated protein 2                                     |
| 1.005           | 1.003        | 0.989        | 0.991        | 1.006        | 1.053        | 1.005        | 1.069        | 1.019        | 0.976         | 0.972         | 1.018         | P57678       | GEMIN4    | Gem-associated protein 4                                     |
| 0.980           | 0.989        | 1.012        | 0.990        | 0.983        | 1.019        | 0.987        | 1.028        | 1.043        | 1.024         | 1.008         | 1.016         | Q8TEQ6       | GEMIN5    | Gem-associated protein 5                                     |
| 1.058           | 1.019        | 0.940        | 0.967        | 0.947        | 1.047        | 0.952        | 0.836        | 1.014        | 1.048         | 0.980         | 1.112         | Q8WXD5       | GEMIN6    | Gem-associated protein 6                                     |
|                 |              |              |              |              |              |              |              |              | 1.105         | 0.905         | 1.120         | Q9H840       | GEMIN7    | Gem-associated protein 7                                     |
| 1.022           | 0.939        | 0.872        | 0.962        | 1.007        | 1.024        | 0.968        | 1.031        | 0.995        | 1.085         | 1.048         | 1.195         | Q9NWZ8       | GEMIN8    | Gem-associated protein 8                                     |
| 0.876           | 1.052        | 0.969        |              |              |              |              |              |              |               |               |               | O75496       | GMNN      | Geminin                                                      |
| 1.054           | 0.994        | 0.979        | 0.974        | 0.956        | 1.066        | 0.998        | 1.077        | 0.945        | 1.031         | 0.946         | 1.058         | Q9P107       | GMIP      | GEM-interacting protein                                      |
| 1.020           | 1.022        | 1.021        | 1.015        | 0.991        | 1.026        | 1.033        | 1.064        | 1.036        | 1.002         | 0.999         | 1.041         | Q12789       | GTF3C1    | General transcription factor 3C polypeptide 1                |
| 1.063           | 0.972        | 1.003        | 0.950        | 0.977        | 0.977        | 1.034        | 0.986        | 1.054        | 0.967         | 1.019         | 0.952         | Q8WUA4       | GTF3C2    | General transcription factor 3C polypeptide 2                |
| 1.018           | 0.994        | 1.034        | 1.032        | 0.937        | 1.018        | 1.035        | 1.022        | 1.006        | 1.005         | 1.048         | 1.021         | Q9Y5Q9       | GTF3C3    | General transcription factor 3C polypeptide 3                |

| Abundance Ratio |              |              |              |              |              |              |              |              |               |               |               | Accession ID | Gene name | Protein Description                                     |
|-----------------|--------------|--------------|--------------|--------------|--------------|--------------|--------------|--------------|---------------|---------------|---------------|--------------|-----------|---------------------------------------------------------|
| 1 d<br>M1/C1    | 1 d<br>M2/C2 | 1 d<br>M3/C3 | 4 d<br>M1/C1 | 4 d<br>M2/C2 | 4 d<br>M3/C3 | 7 d<br>M1/C1 | 7 d<br>M2/C2 | 7 d<br>M3/C3 | 10 d<br>M1/C1 | 10 d<br>M2/C2 | 10 d<br>M3/C3 |              |           |                                                         |
| 0.987           | 1.014        | 0.992        | 1.008        | 0.966        | 1.011        | 1.032        | 1.094        | 1.016        | 0.972         | 0.973         | 1.043         | Q9UKN8       | GTF3C4    | General transcription factor 3C polypeptide 4           |
| 0.955           | 0.944        | 0.938        | 0.968        | 0.962        | 1.063        | 1.013        | 1.059        | 1.065        | 1.058         | 1.020         | 1.043         | Q969F1       | GTF3C6    | General transcription factor 3C polypeptide 6           |
| 1.010           | 1.001        | 0.998        | 0.967        | 0.969        | 1.064        | 1.065        | 1.078        | 1.009        | 0.990         | 1.016         | 1.024         | P29083       | GTF2E1    | General transcription factor IIE subunit 1              |
| 0.979           | 1.003        | 1.026        | 0.954        | 0.964        | 0.994        | 0.956        | 0.967        | 0.987        | 1.034         | 1.010         | 1.070         | P35269       | GTF2F1    | General transcription factor IIF subunit 1              |
| 1.045           | 1.026        | 1.001        | 0.986        | 0.993        | 1.023        | 1.017        | 1.039        | 0.993        | 1.043         | 1.008         | 1.008         | P13984       | GTF2F2    | General transcription factor IIF subunit 2              |
| 0.985           | 0.997        | 1.004        | 1.016        | 0.996        | 1.048        | 1.069        | 1.089        | 0.969        | 1.065         | 0.951         | 1.085         | P32780       | GTF2H1    | General transcription factor IIH subunit 1              |
| 0.993           | 0.997        | 1.085        | 0.971        | 0.950        | 1.056        | 0.990        | 0.937        | 1.002        | 0.975         | 0.981         | 1.051         | Q13888       | GTF2H2    | General transcription factor IIH subunit 2              |
| 1.001           | 0.977        | 1.033        | 0.994        | 0.912        | 1.032        | 1.055        | 1.096        | 1.024        | 0.982         | 1.038         | 0.976         | Q13889       | GTF2H3    | General transcription factor IIH subunit 3              |
| 1.057           | 0.991        | 1.042        | 1.065        | 0.945        | 1.102        | 1.020        | 1.061        | 1.055        | 0.897         | 0.921         | 1.006         | Q92759       | GTF2H4    | General transcription factor IIH subunit 4              |
| 0.954           | 0.954        | 0.990        | 1.064        | 0.931        | 1.078        | 0.991        | 0.989        | 1.012        | 0.973         | 1.039         | 0.992         | Q6ZYL4       | GTF2H5    | General transcription factor IIH subunit 5              |
| 0.986           | 0.996        | 0.980        | 0.989        | 0.979        | 0.981        | 0.998        | 1.016        | 1.001        | 0.975         | 0.977         | 0.995         | P78347       | GTF2I     | General transcription factor II-I                       |
| 0.989           | 0.998        | 1.025        | 0.981        | 0.948        | 1.017        | 0.963        | 1.010        | 0.990        | 0.986         | 0.999         | 0.996         | O60763       | USO1      | General vesicular transport factor p115                 |
| 0.936           | 1.011        | 1.198        | 0.964        | 1.148        | 1.183        | 0.933        | 0.946        | 1.151        |               |               |               | Q14687       | GSE1      | Genetic suppressor element 1                            |
| 1.000           | 1.034        | 0.998        | 1.043        | 0.971        | 0.970        | 1.002        | 1.072        | 1.006        | 1.033         | 0.984         | 1.053         | F5H039       | GPHN      | Gephyrin                                                |
| 0.995           | 0.996        | 1.006        | 1.014        | 1.014        | 1.006        | 0.999        | 0.995        | 1.012        | 1.030         | 0.988         | 1.033         | O95749       | GGPS1     | Geranylgeranyl pyrophosphate synthase                   |
| 1.013           | 1.017        | 1.005        | 1.014        | 1.030        | 0.983        | 1.016        | 1.071        | 0.973        | 1.054         | 0.979         | 1.040         | P53609       | PGGT1B    | Geranylgeranyl transferase type-1 subunit beta          |
| 0.999           | 1.002        | 1.038        | 0.982        | 0.979        | 1.069        | 0.980        | 1.046        | 1.050        | 1.007         | 1.002         | 1.028         | Q92696       | RABGGTA   | Geranylgeranyl transferase type-2 subunit alpha         |
| 0.975           | 0.966        | 0.978        | 0.978        | 1.006        | 1.002        | 0.961        | 1.016        | 1.028        | 0.968         | 0.986         | 1.003         | P53611       | RABGGTB   | Geranylgeranyl transferase type-2 subunit beta          |
| 1.100           | 1.002        | 1.026        | 1.006        | 0.960        | 0.997        | 1.002        | 1.064        | 0.999        | 0.955         | 1.014         | 1.027         | O60318       | MCM3AP    | Germinal-center associated nuclear protein              |
| 0.896           | 0.893        | 1.055        | 0.980        | 0.962        | 1.009        | 0.977        | 1.008        | 1.080        | 1.072         | 1.010         | 0.978         | Q8N2G8       | GHDC      | GH3 domain-containing protein                           |
| 0.925           | 0.929        | 1.080        | 1.002        | 1.033        | 1.025        | 0.933        | 0.942        | 0.994        | 0.990         | 1.027         | 0.980         | Q9H2C0       | GAN       | Gigaxonin                                               |
| 0.992           | 0.978        | 1.016        | 0.998        | 0.970        | 1.016        | 1.035        | 0.967        | 0.987        | 1.066         | 0.975         | 1.067         | Q3V6T2       | CCDC88A   | Girdin                                                  |
| 1.005           | 1.005        | 1.029        | 0.992        | 0.956        | 0.963        | 0.935        | 0.978        | 0.955        | 0.939         | 0.977         | 0.916         | P60983       | GMFB      | Glia maturation factor beta                             |
| 1.142           | 0.992        | 1.088        | 0.977        | 0.756        | 1.107        | 1.055        | 0.959        | 0.904        | 1.066         | 1.043         | 1.053         | Q9NZM4       | GLTSCR1   | Glioma tumor suppressor candidate region gene 1 protein |
| 1.040           | 1.011        | 1.059        | 1.109        | 1.018        | 1.098        | 1.074        | 0.924        | 1.014        | 1.144         | 1.040         | 1.088         | Q9NZM5       | GLTSCR2   | Glioma tumor suppressor candidate region gene 2 protein |
| 1.013           | 0.967        | 1.011        | 0.975        | 0.889        | 1.053        | 0.984        | 1.073        | 1.042        | 0.934         | 1.012         | 1.052         | Q92990       | GLMN      | Glomulin                                                |
| 1.053           | 1.007        | 1.012        | 0.956        | 1.024        | 1.067        | 1.054        | 1.024        | 1.035        | 1.016         | 1.047         | 1.038         | Q9Y692       | GMEB1     | Glucocorticoid modulatory element-binding protein 1     |
| 1.022           | 1.059        | 1.016        | 1.016        | 0.996        | 0.998        | 0.972        | 1.259        | 0.970        | 1.136         | 1.116         | 1.014         | Q9UKD1       | GMEB2     | Glucocorticoid modulatory element-binding protein 2     |
| 0.963           | 1.035        | 1.009        | 0.986        | 1.220        | 1.010        | 1.014        | 1.012        | 1.014        | 0.959         | 1.016         | 0.992         | Q96EK6       | GNPNAT1   | Glucosamine 6-phosphate N-acetyltransferase             |
| 1.017           | 1.001        | 0.998        | 1.010        | 0.997        | 1.034        | 0.989        | 1.080        | 1.026        | 0.946         | 0.993         | 0.933         | P46926       | GNPDA1    | Glucosamine-6-phosphate isomerase 1                     |
| 0.947           | 0.982        | 0.975        | 0.962        | 0.967        | 1.019        | 1.013        | 1.030        | 0.993        | 0.996         | 1.004         | 1.003         | Q8TDQ7       | GNPDA2    | Glucosamine-6-phosphate isomerase 2                     |

| Abundance Ratio |              |              |              |              |              |              |              |              |               |               |               | Accession ID | Gene name | Protein Description                                              |
|-----------------|--------------|--------------|--------------|--------------|--------------|--------------|--------------|--------------|---------------|---------------|---------------|--------------|-----------|------------------------------------------------------------------|
| 1 d<br>M1/C1    | 1 d<br>M2/C2 | 1 d<br>M3/C3 | 4 d<br>M1/C1 | 4 d<br>M2/C2 | 4 d<br>M3/C3 | 7 d<br>M1/C1 | 7 d<br>M2/C2 | 7 d<br>M3/C3 | 10 d<br>M1/C1 | 10 d<br>M2/C2 | 10 d<br>M3/C3 |              |           |                                                                  |
| 1.004           | 1.035        | 0.987        | 0.968        | 0.956        | 0.973        | 0.955        | 0.999        | 0.995        | 0.971         | 0.956         | 0.985         | Q6PCE3       | PGM2L1    | Glucose 1,6-bisphosphate synthase                                |
| 1.026           | 1.013        | 1.017        | 0.970        | 1.013        | 0.972        | 0.913        | 0.981        | 0.971        | 0.905         | 0.998         | 0.925         | A0A0A0MTS2   | GPI       | Glucose-6-phosphate isomerase (Fragment)                         |
| 1.080           | 0.935        | 1.076        | 0.912        | 1.031        | 0.967        | 1.114        | 0.951        | 0.983        | 0.959         | 1.048         | 0.937         | Q3B7J2       | GFOD2     | Glucose-fructose oxidoreductase domain-containing protein 2      |
| 1.055           | 1.097        | 0.958        | 0.996        | 1.024        | 0.976        | 1.004        | 1.189        | 0.985        | 1.033         | 1.019         | 1.022         | Q8IVV7       | GID4      | Glucose-induced degradation protein 4 homolog                    |
| 0.975           | 0.949        | 0.999        | 0.989        | 1.010        | 1.068        | 0.975        | 1.085        | 1.124        | 0.973         | 0.967         | 1.021         | Q9NWU2       | GID8      | Glucose-induced degradation protein 8 homolog                    |
| 1.034           | 0.997        | 0.997        | 0.985        | 0.932        | 0.991        | 0.943        | 0.962        | 0.959        | 0.960         | 0.967         | 0.942         | K7ELL7       | PRKCSH    | Glucosidase 2 subunit beta                                       |
| 1.033           | 0.933        | 0.933        | 0.984        | 0.974        | 1.086        | 0.900        | 1.002        | 1.020        | 1.039         | 1.066         | 1.036         | Q4G148       | GXYLT1    | Glucoside xylosyltransferase 1                                   |
| 0.992           | 0.950        | 0.951        | 0.812        | 0.802        | 0.831        | 0.845        | 0.877        | 0.861        | 0.903         | 0.864         | 0.866         | P04062       | GBA       | Glucosylceramidase                                               |
| 0.981           | 1.001        | 0.978        | 1.024        | 1.025        | 0.996        | 1.003        | 1.003        | 0.991        | 0.985         | 0.999         | 0.956         | P00367       | GLUD1     | Glutamate dehydrogenase 1, mitochondrial                         |
| 1.074           | 0.741        | 1.679        |              |              |              |              |              |              |               |               |               | P49448       | GLUD2     | Glutamate dehydrogenase 2, mitochondrial                         |
| 1.015           | 1.020        | 1.022        | 0.993        | 0.970        | 1.019        | 0.973        | 1.086        | 0.993        | 1.010         | 1.025         | 1.007         | P48506       | GCLC      | Glutamate--cysteine ligase catalytic subunit                     |
| 1.013           | 1.005        | 1.001        | 1.022        | 0.967        | 1.002        | 1.013        | 1.049        | 1.053        | 1.028         | 0.978         | 1.035         | P48507       | GCLM      | Glutamate--cysteine ligase regulatory subunit                    |
| 0.894           | 1.127        | 1.043        | 0.865        | 0.985        | 1.125        | 1.116        | 1.055        | 1.087        |               |               |               | Q86X53       | ERICH1    | Glutamate-rich protein 1                                         |
| 0.974           | 0.966        | 0.978        | 1.001        | 1.032        | 1.029        | 1.021        | 1.034        | 1.084        | 1.023         | 0.994         | 1.030         | Q9BQ67       | GRWD1     | Glutamate-rich WD repeat-containing protein 1                    |
| 0.951           | 1.009        | 0.962        | 0.937        | 0.973        | 0.919        | 0.976        | 0.843        | 0.944        | 0.983         | 0.801         | 0.998         | O94925       | GLS       | Glutaminase kidney isoform, mitochondrial                        |
| 0.947           | 0.938        | 1.052        | 0.966        | 0.899        | 1.033        | 1.130        | 1.058        | 1.055        | 0.965         | 0.914         | 1.051         | Q2KHR3       | QSER1     | Glutamine and serine-rich protein 1                              |
| 1.081           | 1.035        | 1.057        | 1.087        | 1.112        | 1.090        | 0.978        | 0.961        | 0.998        | 1.044         | 1.065         | 1.065         | P15104       | GLUL      | Glutamine synthetase                                             |
| 1.181           | 1.048        | 1.084        | 1.035        | 1.046        | 1.046        | 1.010        | 1.054        | 0.973        | 1.019         | 0.995         | 1.032         | Q6IA69       | NADSYN1   | Glutamine-dependent NAD(+) synthetase                            |
| 0.982           | 0.995        | 1.013        | 1.013        | 1.002        | 1.014        | 0.988        | 1.044        | 1.020        | 0.974         | 1.002         | 1.005         | Q06210       | GFPT1     | Glutamine--fructose-6-phosphate aminotransferase [isomerizing] 1 |
| 1.012           | 1.038        | 1.059        | 0.993        | 0.997        | 1.013        | 0.993        | 0.976        | 1.002        | 0.984         | 0.885         | 1.042         | O94808       | GFPT2     | Glutamine--fructose-6-phosphate aminotransferase [isomerizing] 2 |
| 0.992           | 1.021        | 0.974        | 1.022        | 1.032        | 1.011        | 1.027        | 1.055        | 1.014        | 0.984         | 0.977         | 1.004         | Q2TAL8       | QRICH1    | Glutamine-rich protein 1                                         |
| 1.305           | 0.855        | 0.940        | 1.658        | 0.667        | 0.994        | 1.604        | 0.668        | 0.937        | 1.433         | 0.911         | 0.961         | A0A1B0GVU9   | QARS      | Glutamine--tRNA ligase (Fragment)                                |
| 1.000           | 1.013        | 1.017        | 0.997        | 0.991        | 0.980        | 1.002        | 1.032        | 0.986        | 0.996         | 0.992         | 1.007         | P47897       | QARS      | Glutamine--tRNA ligase                                           |
| 1.004           | 0.962        | 1.061        | 0.872        | 0.860        | 0.988        | 0.982        | 1.078        | 1.464        | 0.993         | 0.928         | 1.035         | Q9NXS2       | QPCTL     | Glutaminyl-peptide cyclotransferase-like protein                 |
| 0.997           | 1.001        | 1.015        | 0.990        | 0.999        | 1.029        | 1.030        | 1.031        | 0.993        | 1.065         | 0.990         | 1.035         | Q9H0R6       | QRSL1     | Glutamyl-tRNA(Gln) amidotransferase subunit A, mitochondrial     |
| 0.999           | 1.006        | 1.023        | 1.026        | 0.964        | 1.000        | 1.026        | 0.958        | 0.984        | 1.015         | 0.983         | 1.087         | O75879       | GATB      | Glutamyl-tRNA(Gln) amidotransferase subunit B, mitochondrial     |
| 0.944           | 1.001        | 0.963        | 1.036        | 0.934        | 1.023        | 0.999        | 1.083        | 1.095        | 1.009         | 0.930         | 0.987         | P35754       | GLRX      | Glutaredoxin-1                                                   |
| 1.005           | 1.007        | 1.001        | 0.996        | 0.986        | 0.982        | 0.978        | 1.087        | 1.019        | 0.923         | 0.960         | 0.969         | O76003       | GLRX3     | Glutaredoxin-3                                                   |
|                 |              |              | 1.017        | 1.713        | 1.422        | 0.806        | 1.255        | 1.056        |               |               |               | A6NC05       | C5orf63   | Glutaredoxin-like protein C5orf63                                |
| 0.991           | 0.974        | 0.909        | 1.054        | 0.940        | 0.974        | 1.008        | 1.019        | 1.038        | 1.063         | 1.006         | 1.052         | Q86SX6       | GLRX5     | Glutaredoxin-related protein 5, mitochondrial                    |
| 0.981           | 0.984        | 1.040        | 1.024        | 1.128        | 1.017        | 0.962        | 0.966        | 1.033        | 0.973         | 1.056         | 1.021         | Q92947       | GCDH      | Glutaryl-CoA dehydrogenase, mitochondrial                        |

| Abundance Ratio |              |              |              |              |              |              |              |              |               |               |               | Accession ID | Gene name | Protein Description                                                 |
|-----------------|--------------|--------------|--------------|--------------|--------------|--------------|--------------|--------------|---------------|---------------|---------------|--------------|-----------|---------------------------------------------------------------------|
| 1 d<br>M1/C1    | 1 d<br>M2/C2 | 1 d<br>M3/C3 | 4 d<br>M1/C1 | 4 d<br>M2/C2 | 4 d<br>M3/C3 | 7 d<br>M1/C1 | 7 d<br>M2/C2 | 7 d<br>M3/C3 | 10 d<br>M1/C1 | 10 d<br>M2/C2 | 10 d<br>M3/C3 |              |           |                                                                     |
| 1.045           | 0.999        | 0.996        | 0.983        | 1.022        | 0.978        | 0.973        | 1.008        | 1.027        | 0.949         | 0.955         | 0.948         | P07203       | GPX1      | Glutathione peroxidase 1                                            |
| 1.088           | 0.988        | 0.963        | 1.007        | 1.036        | 0.968        | 1.031        | 0.965        | 0.992        | 0.970         | 1.016         | 0.915         | A0A087WT12   | GPX4      | Glutathione peroxidase                                              |
| 0.989           | 0.999        | 0.965        | 1.024        | 0.974        | 0.996        | 0.995        | 0.930        | 0.999        | 1.037         | 0.976         | 1.020         | P00390       | GSR       | Glutathione reductase, mitochondrial                                |
| 0.991           | 1.004        | 1.042        | 0.951        | 1.005        | 0.986        | 1.011        | 0.979        | 1.027        | 1.086         | 0.939         | 1.075         | Q8NEC7       | GSTCD     | Glutathione S-transferase C-terminal domain-containing protein      |
| 0.931           | 1.014        | 0.956        | 1.007        | 1.020        | 1.024        | 1.024        | 1.039        | 1.012        | 1.037         | 0.997         | 1.021         | Q9Y2Q3       | GSTK1     | Glutathione S-transferase kappa 1                                   |
| 1.046           | 0.961        | 0.933        | 1.180        | 0.984        | 1.194        | 0.957        | 1.074        | 0.973        | 0.943         | 0.930         | 1.080         | P21266       | GSTM3     | Glutathione S-transferase Mu 3                                      |
| 0.982           | 1.006        | 0.983        | 1.012        | 1.014        | 1.034        | 0.995        | 1.073        | 1.012        | 0.959         | 0.999         | 0.981         | P78417       | GSTO1     | Glutathione S-transferase omega-1                                   |
| 1.077           | 1.017        | 0.969        | 1.026        | 1.005        | 0.971        | 1.012        | 1.064        | 0.984        | 0.972         | 1.006         | 0.914         | P09211       | GSTP1     | Glutathione S-transferase P                                         |
| 1.053           | 0.985        | 1.040        | 0.982        | 0.887        | 0.967        | 1.031        | 1.074        | 1.003        | 1.001         | 0.982         | 0.998         | P0CG30       | GSTT2B    | Glutathione S-transferase theta-2B                                  |
| 1.001           | 0.989        | 0.998        | 0.994        | 1.034        | 1.003        | 0.967        | 0.983        | 0.996        | 0.994         | 1.004         | 0.981         | P48637       | GSS       | Glutathione synthetase                                              |
| 0.965           | 1.007        | 0.950        | 0.994        | 1.053        | 0.990        | 0.950        | 0.983        | 0.999        | 0.935         | 1.004         | 0.938         | P04406       | GAPDH     | Glyceraldehyde-3-phosphate dehydrogenase                            |
| 1.021           | 0.956        | 1.050        | 1.030        | 0.947        | 1.008        | 1.029        | 1.058        | 0.999        | 1.009         | 1.014         | 1.014         | P32189       | GK        | Glycerol kinase                                                     |
| 0.986           | 0.976        | 1.079        | 1.078        | 0.968        | 1.083        | 0.914        | 1.076        | 1.021        | 1.016         | 0.927         | 1.074         | Q9HCL2       | GPAM      | Glycerol-3-phosphate acyltransferase 1, mitochondrial               |
| 0.959           | 0.906        | 1.018        | 1.046        | 0.888        | 1.144        | 0.868        | 1.049        | 1.055        | 0.882         | 0.969         | 0.943         | Q53EU6       | GPAT3     | Glycerol-3-phosphate acyltransferase 3                              |
| 0.978           | 0.920        | 1.026        | 0.928        | 0.923        | 0.950        | 1.070        | 1.083        | 1.025        | 1.054         | 0.988         | 1.064         | Q86UL3       | GPAT4     | Glycerol-3-phosphate acyltransferase 4                              |
| 1.004           | 0.998        | 0.990        | 1.008        | 1.048        | 1.018        | 1.054        | 0.975        | 1.044        | 1.004         | 0.954         | 1.050         | Q8N335       | GPD1L     | Glycerol-3-phosphate dehydrogenase 1-like protein                   |
| 0.988           | 1.001        | 1.004        | 1.007        | 1.003        | 1.013        | 0.987        | 1.038        | 0.997        | 1.012         | 0.997         | 0.981         | P43304       | GPD2      | Glycerol-3-phosphate dehydrogenase, mitochondrial                   |
| 0.977           | 0.997        | 0.996        | 0.978        | 0.998        | 0.991        | 1.015        | 1.013        | 1.007        | 1.043         | 1.005         | 1.054         | A6NDG6       | PGP       | Glycerol-3-phosphate phosphatase                                    |
| 1.092           | 1.021        | 1.029        | 1.128        | 0.952        | 0.994        | 1.047        | 1.249        | 0.992        | 1.047         | 1.025         | 1.074         | Q9NPB8       | GPCPD1    | Glycerophosphocholine phosphodiesterase GPCPD1                      |
|                 |              |              | 0.997        | 1.013        | 0.960        | 1.140        | 1.038        | 1.016        |               |               |               | Q9NZC3       | GDE1      | Glycerophosphodiester phosphodiesterase 1                           |
|                 |              |              | 1.011        | 0.891        | 0.996        | 0.996        | 1.071        | 0.968        | 0.933         | 1.033         | 0.914         | Q8N9F7       | GDPD1     | Glycerophosphodiester phosphodiesterase domain-containing protein 1 |
| 1.120           | 0.949        | 1.010        | 1.042        | 1.687        | 0.956        | 1.073        | 0.858        | 1.166        | 1.010         | 1.015         | 0.966         | P23434       | GCSH      | Glycine cleavage system H protein, mitochondrial                    |
| 0.986           | 1.009        | 0.995        | 0.990        | 0.994        | 0.994        | 0.974        | 1.011        | 0.989        | 0.990         | 0.993         | 0.998         | P41250       | GARS      | Glycine--tRNA ligase                                                |
| 0.992           | 1.004        | 0.985        | 0.977        | 0.964        | 1.021        | 0.948        | 1.006        | 0.993        | 0.991         | 0.972         | 0.986         | P13807       | GYS1      | Glycogen [starch] synthase, muscle                                  |
| 1.023           | 0.982        | 1.021        | 1.008        | 0.973        | 1.045        | 1.018        | 1.033        | 1.018        | 1.017         | 1.011         | 1.014         | P35573       | AGL       | Glycogen debranching enzyme                                         |
| 0.986           | 0.995        | 0.986        | 1.000        | 1.002        | 0.996        | 0.981        | 0.983        | 1.005        | 0.970         | 0.962         | 0.971         | P11216       | PYGB      | Glycogen phosphorylase, brain form                                  |
| 0.978           | 1.002        | 0.981        | 1.006        | 1.006        | 1.000        | 0.996        | 1.034        | 0.995        | 0.997         | 1.022         | 0.988         | P06737       | PYGL      | Glycogen phosphorylase, liver form                                  |
| 0.863           | 1.017        | 0.902        | 0.844        | 0.881        | 0.844        | 0.820        | 1.106        | 0.987        | 0.984         | 0.990         | 0.896         | P11217       | PYGM      | Glycogen phosphorylase, muscle form                                 |
| 1.072           | 1.026        | 1.000        | 1.012        | 0.974        | 0.924        | 0.992        | 1.096        | 1.001        | 0.997         | 0.993         | 0.966         | P49840       | GSK3A     | Glycogen synthase kinase-3 alpha                                    |
| 1.042           | 1.013        | 1.014        | 0.982        | 0.944        | 0.972        | 0.971        | 1.107        | 0.981        | 0.976         | 1.030         | 0.921         | P46976       | GYG1      | Glycogenin-1                                                        |

| Abundance Ratio |              |              |              |              |              |              |              |              |               |               |               | Accession ID | Gene name | Protein Description                                               |
|-----------------|--------------|--------------|--------------|--------------|--------------|--------------|--------------|--------------|---------------|---------------|---------------|--------------|-----------|-------------------------------------------------------------------|
| 1 d<br>M1/C1    | 1 d<br>M2/C2 | 1 d<br>M3/C3 | 4 d<br>M1/C1 | 4 d<br>M2/C2 | 4 d<br>M3/C3 | 7 d<br>M1/C1 | 7 d<br>M2/C2 | 7 d<br>M3/C3 | 10 d<br>M1/C1 | 10 d<br>M2/C2 | 10 d<br>M3/C3 |              |           |                                                                   |
| 1.091           | 0.995        | 1.017        | 1.067        | 0.942        | 1.020        | 1.155        | 1.105        | 1.014        | 1.015         | 0.944         | 1.077         | Q9NZD2       | GLTP      | Glycolipid transfer protein                                       |
| 1.057           | 1.065        | 1.022        | 0.994        | 1.023        | 0.984        | 0.987        | 1.214        | 1.032        | 0.784         | 0.852         | 0.959         | Q5SRI9       | MANEA     | Glycoprotein endo-alpha-1,2-mannosidase                           |
|                 |              |              | 0.911        | 1.002        | 1.051        |              |              |              |               |               |               | Q5VSG8       | MANEAL    | Glycoprotein endo-alpha-1,2-mannosidase-like protein              |
| 0.954           | 1.029        | 1.044        | 0.989        | 0.956        | 1.039        | 1.053        | 1.069        | 0.972        | 1.050         | 1.054         | 1.018         | Q9NS00       | C1GALT1   | Glycoprotein-N-acetylgalactosamine 3-beta-galactosyltransferase 1 |
| 1.059           | 0.996        | 0.983        | 0.965        | 0.925        | 1.009        | 0.982        | 1.002        | 1.031        | 0.997         | 0.992         | 1.015         | O75063       | FAM20B    | Glycosaminoglycan xylosylkinase                                   |
| 0.993           | 1.037        | 1.001        | 1.037        | 0.910        | 1.015        | 1.041        | 1.087        | 1.000        | 1.090         | 1.040         | 0.966         | O43292       | GPAA1     | Glycosylphosphatidylinositol anchor attachment 1 protein          |
| 1.114           | 1.166        | 1.147        | 1.261        | 1.179        | 1.259        | 1.207        | 1.289        | 1.150        | 1.158         | 1.084         | 1.188         | Q68CQ7       | GLT8D1    | Glycosyltransferase 8 domain-containing protein 1                 |
| 1.615           | 1.201        | 1.076        | 0.815        | 0.770        | 0.938        |              |              |              |               |               |               | Q4AE62       | GTDC1     | Glycosyltransferase-like domain-containing protein 1              |
| 0.990           | 1.016        | 0.968        | 1.005        | 1.005        | 0.991        | 0.978        | 0.998        | 0.984        | 0.993         | 1.026         | 0.979         | P30419       | NMT1      | Glycylpeptide N-tetradecanoyltransferase 1                        |
| 0.993           | 0.990        | 0.944        | 0.983        | 0.950        | 0.988        | 0.976        | 1.014        | 0.943        | 1.024         | 1.048         | 0.956         | O60551       | NMT2      | Glycylpeptide N-tetradecanoyltransferase 2                        |
| 0.985           | 1.011        | 0.982        | 0.955        | 0.974        | 1.001        | 0.987        | 1.035        | 1.009        | 1.027         | 0.968         | 1.008         | Q9UBQ7       | GRHPR     | Glyoxylate reductase/hydroxypyruvate reductase                    |
|                 |              |              | 1.055        | 0.942        | 1.070        | 1.076        | 1.031        | 1.060        | 1.519         | 1.424         | 0.843         | P35052       | GPC1      | Glypican-1                                                        |
| 0.980           | 0.959        | 1.005        | 0.917        | 0.950        | 1.044        | 0.984        | 1.036        | 1.097        | 1.011         | 0.983         | 1.048         | O75487       | GPC4      | Glypican-4                                                        |
| 1.033           | 1.010        | 1.014        | 1.018        | 1.123        | 0.994        | 1.058        | 0.980        | 1.028        | 1.067         | 1.018         | 1.013         | H0YNJ6       | GMPR2     | GMP reductase                                                     |
| 0.994           | 0.985        | 0.992        | 1.004        | 1.001        | 1.003        | 1.027        | 1.004        | 1.015        | 0.983         | 0.964         | 1.015         | P49915       | GMPS      | GMP synthase [glutamine-hydrolyzing]                              |
| 0.859           | 0.932        | 1.630        | 0.982        | 0.912        | 1.248        | 1.057        | 1.077        | 1.321        | 1.143         | 0.988         | 1.068         | Q96ET8       | TVP23C    | Golgi apparatus membrane protein TVP23 homolog C                  |
| 0.969           | 0.986        | 1.012        | 0.960        | 0.904        | 1.006        | 1.013        | 0.907        | 0.963        | 1.016         | 0.961         | 1.103         | O00461       | GOLIM4    | Golgi integral membrane protein 4                                 |
| 0.938           | 0.953        | 1.013        | 0.928        | 0.904        | 0.962        | 1.005        | 0.904        | 0.965        | 1.054         | 0.934         | 1.122         | Q8NBJ4       | GOLM1     | Golgi membrane protein 1                                          |
| 0.893           | 0.973        | 1.008        | 0.941        | 0.860        | 1.061        | 0.889        | 1.132        | 1.162        | 1.073         | 0.987         | 1.055         | P0CG08       | GPR89B    | Golgi pH regulator B                                              |
| 0.966           | 1.007        | 1.027        | 0.973        | 1.030        | 1.028        | 0.968        | 0.975        | 1.031        | 0.979         | 0.981         | 1.013         | Q9H4A6       | GOLPH3    | Golgi phosphoprotein 3                                            |
| 0.988           | 0.907        | 1.115        | 0.967        | 0.936        | 0.875        | 0.947        | 1.173        | 1.101        | 0.886         | 0.720         | 0.975         | Q9H4A5       | GOLPH3L   | Golgi phosphoprotein 3-like                                       |
| 0.899           | 1.103        | 0.951        | 0.945        | 0.953        | 1.009        | 1.094        | 1.146        | 1.025        | 1.035         | 1.024         | 1.044         | Q9BQQ3       | GORASP1   | Golgi reassembly-stacking protein 1                               |
| 1.015           | 1.013        | 0.994        | 1.054        | 0.998        | 1.000        | 1.094        | 0.993        | 0.988        | 1.074         | 0.948         | 1.021         | Q9H8Y8       | GORASP2   | Golgi reassembly-stacking protein 2                               |
| 0.989           | 1.018        | 0.993        | 1.014        | 0.990        | 1.006        | 0.976        | 1.069        | 0.987        | 0.977         | 0.998         | 0.951         | Q9H3P7       | ACBD3     | Golgi resident protein GCP60                                      |
| 0.955           | 0.952        | 1.014        | 0.958        | 0.949        | 0.997        | 0.980        | 0.964        | 0.966        | 1.033         | 1.016         | 1.026         | G5E9T8       | GOSR1     | Golgi SNAP receptor complex member 1 (Fragment)                   |
| 1.029           | 1.033        | 0.885        | 1.161        | 0.829        | 1.026        | 1.157        | 0.987        | 1.127        | 1.054         | 0.959         | 1.057         | E7EQ34       | GOSR2     | Golgi SNAP receptor complex member 2                              |
| 0.994           | 0.954        | 1.030        | 0.913        | 0.914        | 1.054        | 0.903        | 0.826        | 1.032        | 0.995         | 0.979         | 1.099         | Q7L5D6       | GET4      | Golgi to ER traffic protein 4 homolog                             |
| 0.968           | 1.004        | 0.997        | 0.975        | 0.970        | 0.982        | 0.959        | 0.927        | 1.002        | 1.109         | 0.943         | 1.017         | Q9HD26       | GOPC      | Golgi-associated PDZ and coiled-coil motif-containing protein     |

| Abundance Ratio |              |              |              |              |              |              |              |              |               |               |               | Accession ID | Gene name | Protein Description                                                        |
|-----------------|--------------|--------------|--------------|--------------|--------------|--------------|--------------|--------------|---------------|---------------|---------------|--------------|-----------|----------------------------------------------------------------------------|
| 1 d<br>M1/C1    | 1 d<br>M2/C2 | 1 d<br>M3/C3 | 4 d<br>M1/C1 | 4 d<br>M2/C2 | 4 d<br>M3/C3 | 7 d<br>M1/C1 | 7 d<br>M2/C2 | 7 d<br>M3/C3 | 10 d<br>M1/C1 | 10 d<br>M2/C2 | 10 d<br>M3/C3 |              |           |                                                                            |
| 0.969           | 0.940        | 1.095        | 1.085        | 0.997        | 1.027        | 0.983        | 0.943        | 0.973        | 1.041         | 1.230         | 1.130         | Q9H4G4       | GLIPR2    | Golgi-associated plant pathogenesis-related protein 1                      |
| 0.996           | 0.974        | 1.082        | 0.985        | 0.992        | 1.030        | 0.955        | 1.083        | 1.086        | 1.052         | 0.924         | 1.172         | Q92805       | GOLGA1    | Golgin subfamily A member 1                                                |
| 0.972           | 0.972        | 1.042        | 0.981        | 0.967        | 1.019        | 0.989        | 0.923        | 0.988        | 1.054         | 1.012         | 1.081         | Q08379       | GOLGA2    | Golgin subfamily A member 2                                                |
| 0.998           | 0.984        | 1.016        | 0.979        | 0.951        | 1.014        | 0.990        | 1.008        | 1.011        | 0.985         | 0.972         | 1.051         | Q08378       | GOLGA3    | Golgin subfamily A member 3                                                |
| 1.040           | 0.893        | 1.035        | 1.009        | 0.960        | 1.055        | 1.027        | 1.000        | 1.022        | 1.031         | 1.004         | 1.093         | Q13439       | GOLGA4    | Golgin subfamily A member 4                                                |
| 0.994           | 0.981        | 1.076        | 1.031        | 0.932        | 0.996        | 0.993        | 1.014        | 1.007        | 1.044         | 0.999         | 1.032         | Q8TBA6       | GOLGA5    | Golgin subfamily A member 5                                                |
| 0.941           | 1.006        | 0.994        | 0.992        | 0.948        | 1.003        | 1.038        | 1.020        | 1.018        | 1.072         | 1.019         | 1.106         | Q7Z5G4       | GOLGA7    | Golgin subfamily A member 7                                                |
|                 |              |              |              |              |              | 0.920        | 0.767        | 0.923        | 0.886         | 1.011         | 1.119         | Q9H2G9       | BLZF1     | Golgin-45                                                                  |
| 0.961           | 1.025        | 1.016        | 0.996        | 0.936        | 1.039        | 1.014        | 0.983        | 1.027        | 1.012         | 1.014         | 1.071         | Q92538       | GBF1      | Golgi-specific brefeldin A-resistance guanine nucleotide exchange factor 1 |
| 0.999           | 1.024        | 0.938        | 1.100        | 0.991        | 1.015        | 0.975        | 1.019        | 1.022        | 0.977         | 1.122         | 1.080         | Q8IXQ4       | GPALPP1   | GPALPP motifs-containing protein 1                                         |
| 0.960           | 0.932        | 1.060        | 0.924        | 0.902        | 0.996        | 1.015        | 1.054        | 1.027        | 1.148         | 0.948         | 0.989         | O95427       | PIGN      | GPI ethanolamine phosphate transferase 1                                   |
| 1.027           | 1.105        | 1.009        | 1.006        | 0.907        | 1.028        | 1.034        | 1.104        | 0.966        | 0.954         | 1.020         | 1.004         | Q5H8A4       | PIGG      | GPI ethanolamine phosphate transferase 2                                   |
| 0.965           | 0.941        | 0.961        | 1.056        | 0.898        | 1.011        | 0.926        | 1.064        | 1.009        | 1.017         | 1.010         | 0.992         | Q8TEQ8       | PIGO      | GPI ethanolamine phosphate transferase 3                                   |
|                 |              |              |              |              |              | 1.121        | 0.878        | 1.187        |               |               |               | Q9H3S5       | PIGM      | GPI mannosyltransferase 1                                                  |
| 1.012           | 1.022        | 1.020        | 1.020        | 0.907        | 1.042        | 0.958        | 1.086        | 0.997        | 1.000         | 0.983         | 0.971         | Q96S52       | PIGS      | GPI transamidase component PIG-S                                           |
| 0.997           | 1.012        | 0.980        | 1.005        | 0.949        | 1.007        | 0.973        | 1.052        | 1.004        | 0.948         | 0.990         | 0.961         | Q969N2       | PIGT      | GPI transamidase component PIG-T                                           |
| 0.996           | 0.992        | 1.017        | 0.968        | 0.959        | 1.005        | 0.952        | 1.014        | 1.021        | 0.971         | 1.041         | 1.024         | Q92643       | PIGK      | GPI-anchor transamidase                                                    |
| 1.033           | 1.046        | 0.834        | 1.036        | 0.881        | 1.094        | 1.074        | 1.044        | 0.954        | 0.951         | 0.961         | 0.988         | Q9H9Y4       | GPN2      | GPN-loop GTPase 2                                                          |
| 1.114           | 0.969        | 1.103        |              |              |              | 1.117        | 1.118        | 0.995        | 1.039         | 1.058         | 1.044         | O43194       | GPR39     | G-protein coupled receptor 39                                              |
| 1.029           | 1.034        | 0.962        | 0.890        | 0.927        | 0.901        | 0.902        | 0.849        | 0.902        | 1.170         | 1.103         | 1.187         | Q96D09       | GPRASP2   | G-protein coupled receptor-associated sorting protein 2                    |
|                 |              |              | 1.050        | 0.978        | 1.089        | 1.078        | 1.030        | 1.007        | 1.030         | 1.024         | 1.079         | A0A0C4DFY5   | GPRC5C    | G-protein-coupled receptor family C group 5 member C                       |
| 1.040           | 1.027        | 1.035        | 0.962        | 0.953        | 1.002        | 0.972        | 1.052        | 0.973        | 1.003         | 0.995         | 1.079         | A0A0A0MSK4   | GPSM1     | G-protein-signaling modulator 1                                            |
| 1.062           | 1.011        | 0.956        | 1.013        | 1.069        | 0.912        | 1.046        | 1.046        | 1.197        | 1.044         | 1.094         | 1.091         | M0QZ12       | GRAMD1A   | GRAM domain-containing protein 1A                                          |
| 1.386           | 0.998        | 0.969        | 0.983        | 0.894        | 0.933        | 0.987        | 0.839        | 1.190        | 1.138         | 0.829         | 1.168         | Q6IC98       | GRAMD4    | GRAM domain-containing protein 4                                           |
| 0.997           | 0.996        | 0.961        | 1.021        | 0.939        | 0.996        | 1.006        | 1.064        | 0.989        | 0.976         | 0.963         | 0.943         | P28676       | GCA       | Grancalcin                                                                 |
| 1.032           | 1.042        | 1.019        | 0.963        | 0.958        | 1.031        | 1.041        | 1.055        | 0.993        | 1.232         | 1.118         | 1.240         | P28799       | GRN       | Granulins                                                                  |
| 0.982           | 0.943        | 0.977        | 1.020        | 0.928        | 1.077        | 1.062        | 1.150        | 1.022        | 1.034         | 1.039         | 0.996         | P16260       | SLC25A16  | Graves disease carrier protein                                             |
| 1.003           | 0.943        | 1.050        | 1.011        | 0.973        | 1.074        | 1.000        | 1.049        | 1.040        | 0.900         | 0.954         | 1.090         | O75420       | GIGYF1    | GRB10-interacting GYF protein 1                                            |
| 0.945           | 0.999        | 1.047        | 0.986        | 1.005        | 1.044        | 0.990        | 0.918        | 1.009        | 1.058         | 1.042         | 1.119         | Q6Y7W6       | GIGYF2    | GRB10-interacting GYF protein 2                                            |
| 0.976           | 1.008        | 0.998        | 1.022        | 1.102        | 1.001        | 1.055        | 0.966        | 0.993        | 1.077         | 1.002         | 1.067         | Q12849       | GRSF1     | G-rich sequence factor 1                                                   |
| 1.046           | 0.974        | 1.013        | 0.976        | 0.923        | 1.035        | 0.983        | 1.029        | 0.984        | 1.010         | 0.998         | 1.052         | Q96CN9       | GCC1      | GRIP and coiled-coil domain-containing protein 1                           |



| Abundance Ratio |              |              |              |              |              |              |              |              |               |               |               | Accession ID | Gene name  | Protein Description                                                   |
|-----------------|--------------|--------------|--------------|--------------|--------------|--------------|--------------|--------------|---------------|---------------|---------------|--------------|------------|-----------------------------------------------------------------------|
| 1 d<br>M1/C1    | 1 d<br>M2/C2 | 1 d<br>M3/C3 | 4 d<br>M1/C1 | 4 d<br>M2/C2 | 4 d<br>M3/C3 | 7 d<br>M1/C1 | 7 d<br>M2/C2 | 7 d<br>M3/C3 | 10 d<br>M1/C1 | 10 d<br>M2/C2 | 10 d<br>M3/C3 |              |            |                                                                       |
| 1.002           | 0.999        | 1.020        | 1.000        | 0.961        | 1.030        | 1.035        | 1.057        | 1.018        | 0.988         | 0.981         | 1.048         | Q81WJ2       | GCC2       | GRIP and coiled-coil domain-containing protein 2                      |
| 1.010           | 1.002        | 1.025        | 1.009        | 0.983        | 1.017        | 1.007        | 0.991        | 0.993        | 1.053         | 0.992         | 1.086         | Q4V328       | GRIPAP1    | GRIP1-associated protein 1                                            |
| 1.013           | 1.023        | 0.991        | 0.967        | 0.990        | 0.974        | 0.995        | 1.078        | 1.059        | 1.028         | 0.976         | 1.073         | Q8NCC3       | PLA2G15    | Group XV phospholipase A2                                             |
| 1.008           | 0.975        | 1.017        | 0.958        | 0.942        | 1.013        | 0.984        | 1.027        | 1.023        | 1.014         | 0.969         | 1.054         | Q8TAE8       | GADD45GIP1 | Growth arrest and DNA damage-inducible proteins-interacting protein 1 |
| 1.127           | 1.027        | 1.032        | 1.038        | 1.033        | 0.994        | 1.102        | 1.173        | 1.000        | 1.003         | 1.057         | 1.054         | Q13322       | GRB10      | Growth factor receptor-bound protein 10                               |
| 1.037           | 0.933        | 0.901        | 0.912        | 0.893        | 1.030        | 0.971        | 0.832        | 1.039        |               |               |               | Q14449       | GRB14      | Growth factor receptor-bound protein 14                               |
| 0.979           | 1.004        | 1.001        | 0.979        | 1.001        | 1.030        | 0.973        | 1.028        | 0.980        | 1.007         | 1.001         | 0.981         | P62993       | GRB2       | Growth factor receptor-bound protein 2                                |
| 0.946           | 0.988        | 1.013        | 0.978        | 0.874        | 1.024        | 1.016        | 1.037        | 0.942        | 1.042         | 0.996         | 0.951         | Q9H3K2       | GHITM      | Growth hormone-inducible transmembrane protein                        |
| 0.918           | 0.912        | 0.927        | 0.918        | 0.914        | 1.033        | 0.938        | 0.983        | 0.912        | 0.923         | 1.003         | 0.853         | Q99988       | GDF15      | Growth/differentiation factor 15                                      |
| 1.150           | 1.135        | 1.148        | 1.008        | 0.950        | 1.145        | 1.074        | 1.046        | 0.828        | 0.985         | 0.877         | 0.956         | P09341       | CXCL1      | Growth-regulated alpha protein                                        |
| 0.999           | 0.987        | 0.979        | 0.969        | 0.997        | 0.953        | 0.978        | 0.949        | 0.956        | 0.983         | 0.976         | 1.022         | Q9HAV7       | GRPEL1     | GrpE protein homolog 1, mitochondrial                                 |
| 0.977           | 1.148        | 1.163        |              |              |              |              |              |              | 0.813         | 0.815         | 0.933         | Q8TAA5       | GRPEL2     | GrpE protein homolog 2, mitochondrial                                 |
| 1.029           | 0.916        | 0.927        | 0.952        | 0.933        | 0.837        | 1.129        | 1.042        | 0.975        | 1.095         | 0.963         | 1.096         | Q9P0R6       | GSKIP      | GSK3-beta interaction protein                                         |
| 0.951           | 1.017        | 0.958        | 1.060        | 1.003        | 0.954        | 1.010        | 0.966        | 1.043        | 1.066         | 0.987         | 1.081         | P30047       | GCHFR      | GTP cyclohydrolase 1 feedback regulatory protein                      |
|                 |              |              |              |              |              | 1.044        | 1.291        | 0.903        |               |               |               | P30793       | GCH1       | GTP cyclohydrolase 1                                                  |
| 1.021           | 0.997        | 0.993        | 0.996        | 0.945        | 1.009        | 0.997        | 1.027        | 0.994        | 1.032         | 0.990         | 1.013         | Q9UIJ7       | AK3        | GTP:AMP phosphotransferase AK3, mitochondrial                         |
| 1.006           | 1.009        | 0.986        | 0.981        | 0.945        | 0.961        | 0.997        | 1.008        | 0.981        | 1.012         | 0.959         | 1.003         | O75616       | ERAL1      | GTPase Era, mitochondrial                                             |
| 1.032           | 0.993        | 1.015        | 1.014        | 1.035        | 0.970        | 1.046        | 1.002        | 0.913        | 1.081         | 1.094         | 0.997         | P01112       | HRAS       | GTPase HRas                                                           |
| 0.957           | 0.970        | 0.998        | 1.063        | 0.901        | 1.029        | 1.055        | 0.933        | 1.022        | 1.077         | 0.976         | 1.039         | P01111       | NRAS       | GTPase NRas                                                           |
| 1.067           | 1.003        | 0.994        | 1.025        | 1.042        | 0.975        | 1.007        | 1.019        | 0.996        | 0.999         | 0.986         | 0.952         | J3KQE5       | RAN        | GTP-binding nuclear protein Ran (Fragment)                            |
| 0.974           | 1.017        | 1.021        | 0.984        | 0.955        | 1.033        | 0.998        | 1.065        | 1.017        | 0.982         | 0.974         | 1.023         | O00178       | GTPBP1     | GTP-binding protein 1                                                 |
| 1.036           | 1.003        | 0.978        | 0.989        | 0.952        | 0.963        | 1.005        | 1.056        | 0.977        | 1.059         | 0.965         | 1.035         | A4D1E9       | GTPBP10    | GTP-binding protein 10                                                |
| 0.898           | 0.929        | 0.787        | 0.849        | 1.034        | 1.023        | 0.983        | 1.146        | 1.065        | 0.884         | 1.050         | 0.959         | Q9BX10       | GTPBP2     | GTP-binding protein 2                                                 |
|                 |              |              | 1.009        | 0.868        | 1.072        |              |              |              |               |               |               | A0A087WUP3   | GTPBP8     | GTP-binding protein 8                                                 |
|                 |              |              |              |              |              | 0.857        | 0.888        | 0.922        | 0.952         | 0.712         | 0.912         | P55042       | RRAD       | GTP-binding protein RAD                                               |
| 0.995           | 0.972        | 0.998        | 1.016        | 0.995        | 1.035        | 1.015        | 1.048        | 1.014        | 0.944         | 0.980         | 1.020         | Q15382       | RHEB       | GTP-binding protein Rheb                                              |
| 1.020           | 0.995        | 0.986        | 1.013        | 0.864        | 1.051        | 1.046        | 1.130        | 0.930        | 1.045         | 1.001         | 0.970         | Q9NR31       | SAR1A      | GTP-binding protein SAR1a                                             |
| 1.123           | 1.033        | 1.054        | 1.100        | 0.924        | 0.997        | 1.056        | 1.014        | 0.954        | 0.941         | 1.034         | 1.011         | Q9Y6B6       | SAR1B      | GTP-binding protein SAR1b                                             |
| 1.031           | 1.083        | 1.005        | 0.965        | 1.031        | 0.930        | 1.001        | 1.107        | 0.973        | 0.948         | 1.082         | 0.978         | Q14353       | GAMT       | Guanidinoacetate N-methyltransferase                                  |
|                 |              |              | 0.888        | 0.930        | 1.176        | 0.820        | 0.745        | 0.900        | 1.152         | 1.139         | 1.113         | Q96LT7       | C9orf72    | Guanine nucleotide exchange C9orf72                                   |
| 0.986           | 0.915        | 0.996        | 1.044        | 0.999        | 1.017        | 1.055        | 1.020        | 1.060        | 1.050         | 1.049         | 1.023         | Q8TBN0       | RAB3IL1    | Guanine nucleotide exchange factor for Rab-3A                         |
| 0.973           | 1.031        | 0.957        | 0.807        | 0.760        | 0.717        | 0.885        | 1.100        | 0.923        | 1.020         | 0.974         | 1.015         | P47224       | RABIF      | Guanine nucleotide exchange factor MSS4                               |
| 0.940           | 1.101        | 1.063        | 1.008        | 1.040        | 1.048        | 0.935        | 0.961        | 1.012        | 1.025         | 1.005         | 0.991         | Q8TEV9       | SMCR8      | Guanine nucleotide exchange protein SMCR8                             |

| Abundance Ratio |              |              |              |              |              |              |              |              |               |               |               | Accession ID | Gene name | Protein Description                                                |
|-----------------|--------------|--------------|--------------|--------------|--------------|--------------|--------------|--------------|---------------|---------------|---------------|--------------|-----------|--------------------------------------------------------------------|
| 1 d<br>M1/C1    | 1 d<br>M2/C2 | 1 d<br>M3/C3 | 4 d<br>M1/C1 | 4 d<br>M2/C2 | 4 d<br>M3/C3 | 7 d<br>M1/C1 | 7 d<br>M2/C2 | 7 d<br>M3/C3 | 10 d<br>M1/C1 | 10 d<br>M2/C2 | 10 d<br>M3/C3 |              |           |                                                                    |
| 0.962           | 1.017        | 0.983        | 1.046        | 0.895        | 0.922        | 1.016        | 1.093        | 1.055        | 1.091         | 1.171         | 1.059         | P63096       | GNAI1     | Guanine nucleotide-binding protein G(i) subunit alpha-1            |
| 0.947           | 0.999        | 1.018        | 0.979        | 0.946        | 0.990        | 0.999        | 1.036        | 1.006        | 1.002         | 0.975         | 1.003         | P04899       | GNAI2     | Guanine nucleotide-binding protein G(i) subunit alpha-2            |
| 0.946           | 0.974        | 0.993        | 0.942        | 0.952        | 1.068        | 0.918        | 0.831        | 0.894        | 0.988         | 1.024         | 1.008         | Q9UBI6       | GNG12     | Guanine nucleotide-binding protein G(l)/G(S)/G(O) subunit gamma-12 |
| 0.990           | 1.018        | 0.991        | 0.958        | 0.835        | 1.007        | 0.968        | 0.934        | 0.800        | 1.035         | 1.003         | 1.010         | P63218       | GNG5      | Guanine nucleotide-binding protein G(l)/G(S)/G(O) subunit gamma-5  |
| 1.006           | 0.996        | 0.973        | 0.991        | 1.028        | 0.950        | 1.016        | 0.912        | 1.005        | 0.994         | 0.982         | 0.979         | P62873       | GNB1      | Guanine nucleotide-binding protein G(l)/G(S)/G(T) subunit beta-1   |
| 1.180           | 1.024        | 1.093        | 1.029        | 1.510        | 1.017        | 1.090        | 0.890        | 1.100        | 0.955         | 0.971         | 1.003         | P62879       | GNB2      | Guanine nucleotide-binding protein G(l)/G(S)/G(T) subunit beta-2   |
| 0.989           | 1.051        | 0.956        | 1.058        | 1.047        | 0.950        | 0.953        | 0.991        | 0.970        | 1.133         | 1.012         | 1.046         | P08754       | GNAI3     | Guanine nucleotide-binding protein G(k) subunit alpha              |
| 0.969           | 0.979        | 0.984        | 0.969        | 0.923        | 1.036        | 1.078        | 1.037        | 1.026        | 1.055         | 1.048         | 1.050         | P50148       | GNAQ      | Guanine nucleotide-binding protein G(q) subunit alpha              |
| 0.903           | 0.882        | 1.022        |              |              |              |              |              |              | 0.940         | 1.003         | 1.036         | P63211       | GNGT1     | Guanine nucleotide-binding protein G(T) subunit gamma-T1           |
| 1.090           | 1.183        | 0.944        | 0.937        | 0.975        | 0.879        |              |              |              |               |               |               | P19086       | GNAZ      | Guanine nucleotide-binding protein G(z) subunit alpha              |
| 0.979           | 1.000        | 0.996        | 0.994        | 0.912        | 1.022        | 1.003        | 1.089        | 1.020        | 1.005         | 1.035         | 1.000         | P29992       | GNA11     | Guanine nucleotide-binding protein subunit alpha-11                |
| 1.092           | 1.011        | 0.946        | 1.012        | 0.952        | 1.012        | 1.151        | 1.098        | 1.103        | 0.966         | 1.035         | 1.045         | Q03113       | GNA12     | Guanine nucleotide-binding protein subunit alpha-12                |
| 0.971           | 0.992        | 1.028        | 1.006        | 0.902        | 1.035        | 1.000        | 1.044        | 1.009        | 1.034         | 1.030         | 1.029         | Q14344       | GNA13     | Guanine nucleotide-binding protein subunit alpha-13                |
| 0.905           | 1.001        | 1.050        | 0.984        | 1.082        | 1.010        | 1.001        | 0.796        | 1.033        | 1.009         | 0.996         | 1.028         | Q9HAV0       | GNB4      | Guanine nucleotide-binding protein subunit beta-4                  |
| 0.915           | 0.864        | 1.071        | 1.120        | 0.863        | 0.892        | 1.035        | 1.262        | 0.914        | 1.008         | 1.010         | 1.083         | O14775       | GNB5      | Guanine nucleotide-binding protein subunit beta-5                  |
| 1.048           | 1.077        | 1.052        | 0.972        | 0.941        | 1.084        | 1.029        | 1.086        | 0.981        | 1.094         | 0.967         | 1.060         | Q9BYB4       | GNB1L     | Guanine nucleotide-binding protein subunit beta-like protein 1     |
| 1.009           | 0.997        | 1.030        | 1.090        | 0.979        | 1.033        | 1.049        | 1.003        | 1.036        | 1.039         | 0.967         | 1.058         | P36915       | GNL1      | Guanine nucleotide-binding protein-like 1                          |
| 0.972           | 0.984        | 1.009        | 0.977        | 0.960        | 1.023        | 0.952        | 1.045        | 1.000        | 0.968         | 1.031         | 1.020         | Q9BVP2       | GNL3      | Guanine nucleotide-binding protein-like 3                          |
| 1.000           | 1.019        | 0.977        | 1.017        | 1.007        | 1.016        | 1.035        | 1.104        | 1.024        | 1.027         | 1.009         | 1.079         | Q9NVN8       | GNL3L     | Guanine nucleotide-binding protein-like 3-like protein             |
| 1.009           | 1.049        | 1.042        | 1.054        | 1.030        | 1.036        | 1.060        | 1.039        | 0.965        | 0.997         | 0.901         | 1.031         | P32455       | GBP1      | Guanylate-binding protein 1                                        |
| 0.993           | 1.043        | 1.078        | 1.053        | 0.973        | 1.027        | 1.105        | 1.036        | 0.980        | 1.049         | 0.896         | 1.093         | P32456       | GBP2      | Guanylate-binding protein 2                                        |
|                 |              |              | 0.818        | 0.958        | 1.144        | 1.038        | 0.988        | 1.065        |               |               |               | Q9HOR5       | GBP3      | Guanylate-binding protein 3                                        |

| Abundance Ratio |              |              |              |              |              |              |              |              |               |               |               | Accession ID | Gene name      | Protein Description                                              |
|-----------------|--------------|--------------|--------------|--------------|--------------|--------------|--------------|--------------|---------------|---------------|---------------|--------------|----------------|------------------------------------------------------------------|
| 1 d<br>M1/C1    | 1 d<br>M2/C2 | 1 d<br>M3/C3 | 4 d<br>M1/C1 | 4 d<br>M2/C2 | 4 d<br>M3/C3 | 7 d<br>M1/C1 | 7 d<br>M2/C2 | 7 d<br>M3/C3 | 10 d<br>M1/C1 | 10 d<br>M2/C2 | 10 d<br>M3/C3 |              |                |                                                                  |
| 0.956           | 1.012        | 1.040        | 0.847        | 1.223        | 0.985        | 1.182        | 1.052        | 1.130        | 0.896         | 0.894         | 1.098         | Q96PP9       | GBP4           | Guanylate-binding protein 4                                      |
| 1.069           | 1.047        | 1.059        | 0.984        | 0.811        | 1.049        | 0.973        | 0.995        | 1.012        |               |               |               | Q8N8V2       | GBP7           | Guanylate-binding protein 7                                      |
| 0.994           | 0.925        | 0.973        | 1.012        | 0.901        | 0.983        | 1.109        | 1.009        | 1.016        | 1.156         | 1.102         | 1.192         | P51790       | CLCN3          | H(+)/Cl(-) exchange transporter 3                                |
| 1.048           | 1.058        | 1.028        | 1.031        | 0.912        | 1.089        | 1.025        | 1.060        | 1.049        | 1.076         | 1.060         | 0.984         | P51798       | CLCN7          | H(+)/Cl(-) exchange transporter 7                                |
| 1.029           | 0.750        | 1.104        | 1.142        | 0.661        | 0.905        | 0.598        | 1.257        | 1.248        | 0.917         | 0.946         | 1.088         | Q96HR8       | NAF1           | H/ACA ribonucleoprotein complex non-core subunit NAF1            |
| 1.047           | 1.021        | 1.001        | 0.984        | 1.074        | 0.996        | 1.015        | 0.984        | 1.049        | 1.011         | 0.992         | 0.966         | Q9NY12       | GAR1           | H/ACA ribonucleoprotein complex subunit 1                        |
| 1.007           | 1.029        | 0.961        | 1.004        | 1.049        | 0.999        | 1.033        | 0.977        | 1.010        | 1.014         | 1.002         | 0.982         | Q9NX24       | NHP2           | H/ACA ribonucleoprotein complex subunit 2                        |
| 1.033           | 1.016        | 0.999        | 1.044        | 0.992        | 0.939        | 0.994        | 1.052        | 0.964        | 0.938         | 1.061         | 0.912         | Q9NPE3       | NOP10          | H/ACA ribonucleoprotein complex subunit 3                        |
| 1.007           | 0.996        | 1.002        | 0.983        | 0.998        | 1.000        | 0.990        | 0.990        | 0.998        | 0.972         | 1.021         | 0.963         | O60832       | DKC1           | H/ACA ribonucleoprotein complex subunit 4                        |
| 0.986           | 0.989        | 1.009        | 0.965        | 0.970        | 1.010        | 1.005        | 1.020        | 1.002        | 1.008         | 0.981         | 0.988         | Q9BXW7       | HDHD5          | Haloacid dehalogenase-like hydrolase domain-containing 5         |
| 0.989           | 1.007        | 0.986        | 0.997        | 0.949        | 1.037        | 1.004        | 1.015        | 1.003        | 1.033         | 0.999         | 1.029         | Q9H0R4       | HDHD2          | Haloacid dehalogenase-like hydrolase domain-containing protein 2 |
| 1.083           | 1.033        | 1.033        | 0.941        | 0.980        | 1.019        | 0.956        | 1.068        | 0.996        | 1.035         | 0.982         | 1.028         | Q9BSH5       | HDHD3          | Haloacid dehalogenase-like hydrolase domain-containing protein 3 |
| 1.005           | 1.008        | 1.049        | 1.003        | 1.114        | 1.045        | 1.026        | 1.112        | 0.950        | 1.029         | 1.018         | 1.028         | Q92574       | TSC1           | Hamartin                                                         |
| 1.085           | 0.996        | 1.019        | 0.952        | 0.896        | 1.167        | 0.973        | 1.021        | 1.040        | 0.950         | 0.994         | 0.968         | Q96CS2       | HAUS1          | HAUS augmin-like complex subunit 1                               |
| 0.987           | 0.928        | 1.017        | 1.084        | 1.079        | 0.835        | 1.280        | 1.028        | 0.846        | 0.948         | 0.934         | 0.967         | Q9NVX0       | HAUS2          | HAUS augmin-like complex subunit 2                               |
| 0.933           | 1.008        | 1.070        | 0.989        | 0.877        | 1.040        | 0.992        | 1.092        | 1.089        | 0.967         | 0.962         | 1.041         | Q68CZ6       | HAUS3          | HAUS augmin-like complex subunit 3                               |
| 1.080           | 0.990        | 1.024        | 0.996        | 1.060        | 1.043        | 1.028        | 1.107        | 1.056        | 1.051         | 1.052         | 1.049         | Q9H6D7       | HAUS4          | HAUS augmin-like complex subunit 4                               |
| 1.020           | 0.983        | 1.029        | 0.943        | 0.995        | 0.990        | 1.029        | 1.046        | 1.038        | 0.989         | 0.951         | 1.048         | O94927       | HAUS5          | HAUS augmin-like complex subunit 5                               |
| 1.054           | 0.966        | 1.023        | 1.066        | 0.970        | 1.016        | 0.967        | 1.102        | 0.993        | 0.913         | 0.942         | 1.083         | Q7Z4H7       | HAUS6          | HAUS augmin-like complex subunit 6                               |
| 0.778           | 0.996        | 1.028        | 0.818        | 0.986        | 0.971        | 0.749        | 0.582        | 1.061        | 0.935         | 0.928         | 1.016         | Q9BT25       | HAUS8          | HAUS augmin-like complex subunit 8                               |
| 0.994           | 1.024        | 1.024        | 1.018        | 0.983        | 1.002        | 1.029        | 1.021        | 1.032        | 1.025         | 1.035         | 1.051         | Q9Y450       | HBS1L          | HBS1-like protein                                                |
| 1.140           | 1.115        | 1.040        | 0.994        | 0.992        | 1.102        | 0.991        | 0.976        | 1.028        | 1.009         | 1.095         | 0.992         | A0A0C4DFM2   | ZNF574         | HCG1643764, isoform CRA_b                                        |
| 0.650           | 1.269        | 1.495        |              |              |              | 1.441        | 0.693        | 1.135        |               |               |               | J3KR51       | ZNF525         | HCG1787564                                                       |
| 1.084           | 1.009        | 0.987        | 1.004        | 0.951        | 1.045        | 0.972        | 1.086        | 0.987        | 0.988         | 1.081         | 0.917         | I3L4Q0       | MCRIP1         | HCG1818442, isoform CRA_a                                        |
| 1.310           | 1.170        | 1.301        | 0.931        | 1.011        | 1.013        |              |              |              | 0.915         | 1.322         | 0.993         | A4D104       | LOC401307      | HCG19535                                                         |
| 1.072           | 0.993        | 1.007        | 0.993        | 0.962        | 0.997        | 1.015        | 1.032        | 1.047        | 0.946         | 0.981         | 0.957         | I3L0E3       | hCG_1984214    | HCG1984214, isoform CRA_a                                        |
| 1.057           | 1.020        | 0.982        | 1.060        | 1.067        | 0.985        | 1.019        | 1.129        | 0.977        | 1.028         | 1.023         | 1.065         | G3XAH0       |                | 5-Sep HCG2002594, isoform CRA_c                                  |
| 0.934           | 0.989        | 0.990        | 0.982        | 1.007        | 0.943        | 1.021        | 1.008        | 0.949        |               |               |               | J3KQ70       | INO80B-WBP1    | HCG2039827, isoform CRA_e                                        |
| 1.003           | 1.006        | 1.000        | 0.984        | 0.965        | 1.017        | 1.010        | 1.009        | 1.002        | 0.999         | 1.042         | 1.021         | A0A0B4J1V8   | PPAN-P2RY11    | HCG2039996                                                       |
| 1.025           | 0.994        | 0.984        | 1.012        | 0.935        | 1.007        | 0.969        | 1.061        | 0.981        | 0.981         | 0.994         | 0.967         | I3L0A0       | TMEM189-UBE2V1 | HCG2044781                                                       |
| 0.957           | 0.986        | 1.095        | 0.951        | 1.013        | 0.989        |              |              |              |               |               |               | D6W601       | ADAT3          | HCG22695, isoform CRA_a                                          |

| Abundance Ratio |              |              |              |              |              |              |              |              |               |               |               | Accession ID | Gene name | Protein Description                                |
|-----------------|--------------|--------------|--------------|--------------|--------------|--------------|--------------|--------------|---------------|---------------|---------------|--------------|-----------|----------------------------------------------------|
| 1 d<br>M1/C1    | 1 d<br>M2/C2 | 1 d<br>M3/C3 | 4 d<br>M1/C1 | 4 d<br>M2/C2 | 4 d<br>M3/C3 | 7 d<br>M1/C1 | 7 d<br>M2/C2 | 7 d<br>M3/C3 | 10 d<br>M1/C1 | 10 d<br>M2/C2 | 10 d<br>M3/C3 |              |           |                                                    |
| 1.003           | 0.996        | 1.045        | 0.986        | 0.965        | 1.008        | 0.984        | 1.069        | 1.037        | 0.977         | 1.002         | 1.021         | Q53T59       | HS1BP3    | HCLS1-binding protein 3                            |
| 1.087           | 1.026        | 0.998        | 1.032        | 0.952        | 1.030        | 0.983        | 0.994        | 0.993        | 1.014         | 1.053         | 0.997         | Q724H3       | HDDC2     | HD domain-containing protein 2                     |
|                 |              |              | 1.039        | 0.883        | 0.957        | 0.888        | 1.233        | 1.196        | 0.983         | 1.029         | 0.910         | Q9UBI9       | HECA      | Headcase protein homolog                           |
| 0.994           | 1.004        | 1.022        | 0.992        | 0.950        | 1.047        | 0.988        | 1.119        | 1.036        | 0.991         | 1.035         | 0.995         | Q9H583       | HEATR1    | HEAT repeat-containing protein 1                   |
| 0.996           | 0.988        | 1.028        | 0.990        | 0.940        | 1.017        | 1.011        | 1.106        | 1.008        | 0.931         | 0.967         | 1.007         | Q724Q2       | HEATR3    | HEAT repeat-containing protein 3                   |
| 1.070           | 1.041        | 1.050        | 1.014        | 0.938        | 1.028        | 1.040        | 1.205        | 1.063        | 1.008         | 1.010         | 1.032         | F5H619       | HEATR5A   | HEAT repeat-containing protein 5A                  |
| 1.076           | 1.036        | 1.073        | 1.308        | 0.802        | 1.037        | 0.944        | 1.042        | 1.039        | 0.952         | 1.074         | 1.066         | Q9P2D3       | HEATR5B   | HEAT repeat-containing protein 5B                  |
| 1.014           | 0.984        | 1.052        | 0.962        | 0.979        | 1.027        | 0.956        | 1.013        | 1.087        | 0.930         | 0.965         | 1.022         | Q6AI08       | HEATR6    | HEAT repeat-containing protein 6                   |
| 0.959           | 1.003        | 1.111        | 1.061        | 0.887        | 0.977        | 0.998        | 1.065        | 1.025        | 0.973         | 0.943         | 1.038         | A0A1B0GTF3   | HSPA12A   | Heat shock 70 kDa protein 12A                      |
| 1.055           | 1.068        | 1.027        | 1.044        | 0.958        | 1.004        | 0.995        | 1.075        | 0.984        | 0.983         | 1.007         | 0.977         | P48723       | HSPA13    | Heat shock 70 kDa protein 13                       |
| 0.994           | 1.006        | 1.010        | 0.986        | 0.957        | 1.049        | 0.980        | 1.022        | 1.011        | 1.002         | 1.020         | 1.072         | Q0VDF9       | HSPA14    | Heat shock 70 kDa protein 14                       |
| 0.994           | 0.993        | 0.976        | 0.986        | 1.008        | 0.985        | 0.985        | 1.009        | 1.005        | 0.965         | 0.984         | 0.970         | A0A0G2JIW1   | HSPA1B    | Heat shock 70 kDa protein 1B                       |
|                 |              |              |              |              |              | 0.684        | 1.004        | 1.057        | 0.870         | 0.996         | 1.128         | P34931       | HSPA1L    | Heat shock 70 kDa protein 1-like                   |
| 0.957           | 0.994        | 0.987        | 0.988        | 1.030        | 1.002        | 1.003        | 0.965        | 1.008        | 0.996         | 1.024         | 0.987         | P34932       | HSPA4     | Heat shock 70 kDa protein 4                        |
| 0.986           | 1.013        | 0.990        | 1.005        | 0.963        | 1.026        | 1.007        | 0.998        | 0.999        | 0.997         | 0.992         | 1.011         | O95757       | HSPA4L    | Heat shock 70 kDa protein 4L                       |
| 0.859           | 1.031        | 0.894        | 0.971        | 1.002        | 1.085        | 1.157        | 1.081        | 1.056        | 1.230         | 1.089         | 1.376         | E9PN89       | HSPA8     | Heat shock cognate 71 kDa protein (Fragment)       |
| 0.987           | 0.923        | 1.042        | 0.936        | 0.830        | 1.045        | 1.019        | 1.189        | 1.401        | 1.287         | 0.984         | 1.299         | E9PK54       | HSPA8     | Heat shock cognate 71 kDa protein (Fragment)       |
| 0.999           | 1.017        | 0.990        | 1.013        | 1.064        | 0.997        | 1.016        | 1.001        | 1.027        | 0.976         | 1.013         | 0.972         | P11142       | HSPA8     | Heat shock cognate 71 kDa protein                  |
| 0.988           | 1.022        | 1.020        | 1.013        | 0.927        | 1.046        | 1.075        | 0.978        | 1.011        | 1.025         | 0.983         | 1.085         | Q00613       | HSF1      | Heat shock factor protein 1                        |
| 0.971           | 1.036        | 1.059        | 0.970        | 1.060        | 1.041        | 0.967        | 0.884        | 0.955        | 0.925         | 0.948         | 1.034         | O75506       | HSBP1     | Heat shock factor-binding protein 1                |
| 0.949           | 0.997        | 0.996        | 0.969        | 0.970        | 0.974        | 0.975        | 0.984        | 1.013        | 0.948         | 0.930         | 1.014         | Q92598       | HSPH1     | Heat shock protein 105 kDa                         |
| 1.013           | 0.979        | 0.997        | 1.011        | 0.950        | 0.989        | 0.992        | 0.999        | 0.975        | 0.961         | 0.994         | 0.947         | Q12931       | TRAP1     | Heat shock protein 75 kDa, mitochondrial           |
| 1.022           | 0.990        | 0.988        | 0.970        | 0.954        | 0.952        | 0.958        | 1.013        | 0.981        | 0.951         | 0.946         | 0.980         | P04792       | HSPB1     | Heat shock protein beta-1                          |
| 0.979           | 1.015        | 0.966        | 1.009        | 1.020        | 0.984        | 0.994        | 1.013        | 0.990        | 0.977         | 0.990         | 0.970         | P08238       | HSP90AB1  | Heat shock protein HSP 90-beta                     |
| 0.961           | 0.954        | 0.978        | 0.968        | 0.931        | 1.024        | 0.861        | 1.006        | 0.889        | 0.964         | 1.067         | 1.068         | P54652       | HSPA2     | Heat shock-related 70 kDa protein 2                |
| 0.882           | 0.942        | 1.110        | 0.915        | 0.897        | 0.920        | 0.941        | 0.960        | 1.009        | 1.010         | 1.016         | 1.031         | Q9Y4B4       | RAD54L2   | Helicase ARIP4                                     |
| 0.971           | 0.990        | 1.013        | 0.953        | 0.984        | 1.012        | 1.018        | 1.032        | 1.036        | 1.019         | 0.965         | 1.021         | Q15477       | SKIV2L    | Helicase SKI2W                                     |
| 1.090           | 1.029        | 1.002        | 0.990        | 1.035        | 0.989        | 1.031        | 0.925        | 0.962        | 1.036         | 1.038         | 1.097         | Q6ZRS2       | SRCAP     | Helicase SRCAP                                     |
| 0.997           | 0.996        | 1.053        | 0.972        | 0.916        | 1.013        | 0.989        | 0.985        | 0.993        | 1.011         | 0.958         | 1.052         | Q9BYK8       | HELZ2     | Helicase with zinc finger domain 2                 |
| 0.958           | 1.025        | 1.003        | 1.020        | 0.961        | 0.977        | 1.094        | 1.070        | 1.026        | 1.029         | 0.921         | 1.004         | A0A0B4J1V9   | HELLS     | Helicase, lymphoid-specific, isoform CRA_b         |
| 0.984           | 1.029        | 1.009        | 0.996        | 0.978        | 0.995        | 1.012        | 1.093        | 1.012        | 1.003         | 0.951         | 0.995         | Q14527       | HLTF      | Helicase-like transcription factor                 |
| 0.945           | 0.955        | 0.998        | 0.936        | 0.959        | 0.904        | 0.964        | 0.895        | 1.002        | 0.943         | 1.000         | 1.022         | Q9UK76       | HN1       | Hematological and neurological expressed 1 protein |
| 1.008           | 1.007        | 1.021        | 0.985        | 0.992        | 1.006        | 1.067        | 1.070        | 0.990        | 1.081         | 1.141         | 1.057         | P09601       | HMOX1     | Heme oxygenase 1                                   |

| Abundance Ratio |              |              |              |              |              |              |              |              |               |               |               | Accession ID | Gene name | Protein Description                                              |
|-----------------|--------------|--------------|--------------|--------------|--------------|--------------|--------------|--------------|---------------|---------------|---------------|--------------|-----------|------------------------------------------------------------------|
| 1 d<br>M1/C1    | 1 d<br>M2/C2 | 1 d<br>M3/C3 | 4 d<br>M1/C1 | 4 d<br>M2/C2 | 4 d<br>M3/C3 | 7 d<br>M1/C1 | 7 d<br>M2/C2 | 7 d<br>M3/C3 | 10 d<br>M1/C1 | 10 d<br>M2/C2 | 10 d<br>M3/C3 |              |           |                                                                  |
| 0.904           | 0.990        | 0.988        | 0.985        | 0.959        | 1.022        | 1.034        | 1.024        | 0.997        | 1.016         | 1.020         | 1.035         | A0A087WT44   | HMOX2     | Heme oxygenase 2                                                 |
| 0.984           | 0.936        | 0.912        | 0.891        | 0.923        | 1.323        | 1.325        | 1.038        | 1.179        | 1.187         | 0.834         | 1.318         | Q6P1K1       | SLC48A1   | Heme transporter HRG1                                            |
| 1.007           | 1.006        | 0.992        | 1.047        | 1.047        | 1.052        | 1.019        | 1.043        | 1.037        | 1.028         | 1.017         | 1.096         | Q9NRV9       | HEBP1     | Heme-binding protein 1                                           |
| 1.071           | 1.006        | 1.005        | 1.035        | 0.975        | 0.973        | 0.991        | 1.047        | 0.999        | 1.038         | 1.072         | 1.004         | Q9Y5Z4       | HEBP2     | Heme-binding protein 2                                           |
| 0.983           | 1.025        | 1.067        | 0.968        | 0.982        | 1.046        | 1.008        | 1.009        | 0.979        | 0.972         | 0.978         | 1.195         | B2RA97       | HEMK2     | HemK methyltransferase family member 2                           |
| 1.020           | 1.046        | 0.978        | 1.062        | 0.952        | 1.001        | 1.024        | 1.096        | 1.000        | 1.020         | 1.012         | 0.944         | Q7LGA3       | HS2ST1    | Heparan sulfate 2-O-sulfotransferase 1                           |
|                 |              |              | 0.854        | 0.764        | 1.065        | 1.159        | 1.054        | 0.966        |               |               |               | Q68CP4       | HGSNAT    | Heparan-alpha-glucosaminide N-acetyltransferase                  |
| 1.044           | 1.055        | 1.050        | 1.030        | 1.103        | 1.201        | 1.043        | 1.244        | 1.164        | 1.185         | 1.290         | 1.378         | Q9Y251       | HPSE      | Heparanase                                                       |
| 0.963           | 1.033        | 1.130        | 0.977        | 0.946        | 1.052        | 1.169        | 0.970        | 1.019        | 1.183         | 0.969         | 1.044         | Q96D42       | HAVCR1    | Hepatitis A virus cellular receptor 1                            |
| 0.946           | 1.017        | 1.037        | 1.016        | 0.895        | 1.049        | 1.036        | 1.003        | 1.019        | 0.956         | 0.972         | 1.022         | P08581       | MET       | Hepatocyte growth factor receptor                                |
| 1.001           | 1.011        | 0.994        | 1.027        | 1.001        | 0.999        | 1.032        | 1.039        | 0.996        | 1.030         | 1.021         | 1.001         | O14964       | HGS       | Hepatocyte growth factor-regulated tyrosine kinase substrate     |
| 1.168           | 1.055        | 1.134        | 0.996        | 1.003        | 0.941        | 0.947        | 1.101        | 1.034        | 0.948         | 0.929         | 0.940         | P35680       | HNF1B     | Hepatocyte nuclear factor 1-beta                                 |
| 0.972           | 0.985        | 0.985        | 0.966        | 1.039        | 0.999        | 0.995        | 0.871        | 1.003        | 1.031         | 0.995         | 1.037         | P51858       | HDGF      | Hepatoma-derived growth factor                                   |
| 1.013           | 0.989        | 0.996        | 0.938        | 0.932        | 1.011        | 0.969        | 0.901        | 0.966        | 1.003         | 0.985         | 1.043         | A0A024R216   | HDGFRP3   | Hepatoma-derived growth factor, related protein 3, isoform CRA_a |
| 1.017           | 1.001        | 1.013        | 0.978        | 0.998        | 0.988        | 1.006        | 0.941        | 0.974        | 1.087         | 1.028         | 1.097         | Q7Z4V5       | HDGFRP2   | Hepatoma-derived growth factor-related protein 2                 |
| 1.243           | 0.937        | 1.062        |              |              |              | 0.886        | 1.146        | 1.048        | 0.835         | 0.993         | 0.945         | Q30201       | HFE       | Hereditary hemochromatosis protein                               |
| 0.859           | 1.195        | 1.194        |              |              |              | 1.003        | 1.218        | 1.102        | 0.960         | 1.079         | 1.001         | Q92902       | HPS1      | Hermansky-Pudlak syndrome 1 protein                              |
| 1.155           | 0.892        | 1.044        | 0.979        | 0.948        | 1.067        | 0.998        | 1.083        | 1.029        | 0.984         | 0.969         | 1.053         | Q969F9       | HPS3      | Hermansky-Pudlak syndrome 3 protein                              |
| 1.025           | 1.016        | 1.025        | 1.034        | 0.988        | 1.082        | 1.068        | 1.089        | 1.036        | 1.005         | 0.990         | 1.063         | Q9UPZ3       | HPS5      | Hermansky-Pudlak syndrome 5 protein                              |
| 0.991           | 0.971        | 1.037        | 1.024        | 1.001        | 0.999        | 0.982        | 1.013        | 1.066        | 0.995         | 0.989         | 1.096         | Q86YV9       | HPS6      | Hermansky-Pudlak syndrome 6 protein                              |
| 1.031           | 1.006        | 0.983        | 0.990        | 1.051        | 0.988        | 0.986        | 0.945        | 0.966        | 1.004         | 1.003         | 0.952         | Q5SSJ5       | HP1BP3    | Heterochromatin protein 1-binding protein 3                      |
| 0.987           | 0.999        | 0.982        | 1.000        | 0.970        | 0.996        | 1.012        | 0.978        | 0.969        | 1.071         | 1.046         | 1.039         | Q13151       | HNRNPA0   | Heterogeneous nuclear ribonucleoprotein A0                       |
| 1.019           | 1.000        | 1.013        | 1.003        | 1.017        | 0.966        | 0.961        | 0.991        | 0.997        | 0.939         | 1.048         | 0.974         | P09651       | HNRNPA1   | Heterogeneous nuclear ribonucleoprotein A1                       |
|                 |              |              |              |              |              | 0.959        | 0.349        | 1.443        |               |               |               | Q32P51       | HNRNPA1L2 | Heterogeneous nuclear ribonucleoprotein A1-like 2                |
| 1.027           | 1.003        | 0.997        | 1.014        | 1.045        | 0.926        | 0.957        | 0.905        | 0.949        | 0.987         | 1.036         | 0.946         | P51991       | HNRNPA3   | Heterogeneous nuclear ribonucleoprotein A3                       |
| 0.931           | 0.984        | 0.955        | 0.964        | 1.044        | 0.988        | 0.983        | 0.954        | 1.005        | 0.999         | 1.002         | 0.974         | O14979       | HNRNPDL   | Heterogeneous nuclear ribonucleoprotein D-like                   |
| 1.029           | 0.996        | 0.993        | 1.021        | 1.093        | 1.007        | 1.014        | 0.987        | 1.035        | 1.024         | 1.050         | 0.995         | P52597       | HNRNPF    | Heterogeneous nuclear ribonucleoprotein F                        |
| 0.996           | 0.993        | 0.980        | 0.989        | 1.007        | 1.003        | 0.999        | 0.971        | 1.019        | 0.982         | 1.003         | 1.000         | G8JLB6       | HNRNPH1   | Heterogeneous nuclear ribonucleoprotein H                        |
| 0.972           | 1.000        | 0.980        | 0.994        | 0.990        | 1.015        | 1.012        | 1.015        | 1.016        | 0.996         | 1.020         | 1.015         | P55795       | HNRNPH2   | Heterogeneous nuclear ribonucleoprotein H2                       |
| 1.018           | 0.970        | 1.000        | 0.972        | 0.955        | 1.011        | 0.986        | 1.017        | 1.003        | 0.967         | 0.986         | 0.975         | P31942       | HNRNPH3   | Heterogeneous nuclear ribonucleoprotein H3                       |
| 0.997           | 0.995        | 0.982        | 1.001        | 1.086        | 0.938        | 1.004        | 0.938        | 0.977        | 0.957         | 1.023         | 0.931         | P14866       | HNRNPL    | Heterogeneous nuclear ribonucleoprotein L                        |

| Abundance Ratio |              |              |              |              |              |              |              |              |               |               |               | Accession ID | Gene name | Protein Description                                                           |
|-----------------|--------------|--------------|--------------|--------------|--------------|--------------|--------------|--------------|---------------|---------------|---------------|--------------|-----------|-------------------------------------------------------------------------------|
| 1 d<br>M1/C1    | 1 d<br>M2/C2 | 1 d<br>M3/C3 | 4 d<br>M1/C1 | 4 d<br>M2/C2 | 4 d<br>M3/C3 | 7 d<br>M1/C1 | 7 d<br>M2/C2 | 7 d<br>M3/C3 | 10 d<br>M1/C1 | 10 d<br>M2/C2 | 10 d<br>M3/C3 |              |           |                                                                               |
| 1.001           | 0.999        | 0.981        | 1.005        | 1.024        | 0.973        | 1.030        | 0.931        | 0.990        | 1.032         | 1.023         | 1.053         | D6W592       | HNRPLL    | Heterogeneous nuclear ribonucleoprotein L-like                                |
| 0.884           | 0.925        | 0.927        | 1.018        | 0.988        | 0.987        | 1.096        | 0.959        | 0.993        | 1.120         | 1.122         | 0.984         | M0QZM1       | HNRNPM    | Heterogeneous nuclear ribonucleoprotein M (Fragment)                          |
| 0.944           | 1.005        | 0.954        | 0.989        | 1.007        | 1.002        | 0.990        | 0.987        | 1.005        | 0.999         | 1.007         | 0.996         | P52272       | HNRNPM    | Heterogeneous nuclear ribonucleoprotein M                                     |
| 1.016           | 1.008        | 0.999        | 1.000        | 1.030        | 0.994        | 0.982        | 1.064        | 1.031        | 0.994         | 1.025         | 0.981         | O60506       | SYNCRIP   | Heterogeneous nuclear ribonucleoprotein Q                                     |
| 1.014           | 0.991        | 0.993        | 0.992        | 1.024        | 0.981        | 0.975        | 0.996        | 1.009        | 0.972         | 1.011         | 0.965         | O43390       | HNRNPR    | Heterogeneous nuclear ribonucleoprotein R                                     |
| 1.036           | 0.996        | 0.995        | 0.986        | 1.147        | 0.958        | 0.994        | 0.859        | 0.987        | 0.971         | 1.009         | 0.977         | Q00839       | HNRNPU    | Heterogeneous nuclear ribonucleoprotein U                                     |
| 1.021           | 1.011        | 0.990        | 1.005        | 1.040        | 0.964        | 1.020        | 0.959        | 1.000        | 1.021         | 0.999         | 0.980         | Q9BUJ2       | HNRNPUL1  | Heterogeneous nuclear ribonucleoprotein U-like protein 1                      |
| 1.022           | 1.051        | 1.021        | 0.994        | 1.056        | 0.996        | 0.994        | 0.932        | 0.989        | 1.009         | 1.002         | 1.016         | Q1KMD3       | HNRNPUL2  | Heterogeneous nuclear ribonucleoprotein U-like protein 2                      |
| 1.016           | 0.996        | 0.998        | 0.993        | 1.001        | 0.955        | 0.966        | 0.981        | 0.979        | 0.979         | 1.011         | 0.973         | P22626       | HNRNPA2B1 | Heterogeneous nuclear ribonucleoproteins A2/B1                                |
|                 |              |              | 0.945        | 0.718        | 1.093        | 1.006        | 0.940        | 0.999        |               |               |               | G3V5V7       | HNRNPC    | Heterogeneous nuclear ribonucleoproteins C1/C2 (Fragment)                     |
| 1.049           | 0.987        | 1.075        | 1.079        | 0.918        | 1.082        | 1.015        | 0.980        | 0.980        | 0.920         | 0.962         | 1.036         | P52789       | HK2       | Hexokinase-2                                                                  |
| 0.947           | 1.226        | 1.145        | 1.042        | 0.890        | 1.128        | 0.695        | 1.126        | 0.710        | 0.969         | 1.019         | 0.739         | Q9BW72       | HIGD2A    | HIG1 domain family member 2A, mitochondrial                                   |
| 0.969           | 1.002        | 0.955        | 1.004        | 0.887        | 1.146        | 1.046        | 1.141        | 1.136        | 1.086         | 1.041         | 1.087         | P30825       | SLC7A1    | High affinity cationic amino acid transporter 1                               |
| 0.986           | 0.990        | 1.001        | 1.005        | 0.974        | 1.021        | 1.011        | 1.022        | 1.016        | 1.023         | 1.002         | 1.059         | A0A024R4E5   | HDLBP     | High density lipoprotein binding protein (Vigilin), isoform CRA_a             |
| 0.933           | 0.899        | 1.028        | 0.827        | 0.951        | 1.109        | 0.855        | 0.609        | 0.901        | 1.091         | 0.895         | 0.810         | A0A087WZE9   | HMGN3     | High mobility group nucleosome-binding domain-containing protein 3            |
| 1.019           | 0.779        | 0.925        | 0.525        | 0.696        | 1.010        | 0.791        | 0.385        | 0.583        | 1.537         | 0.653         | 0.491         | O00479       | HMGN4     | High mobility group nucleosome-binding domain-containing protein 4            |
|                 |              |              | 1.021        | 0.838        | 0.919        |              |              |              |               |               |               | Q5JSK9       | HMGN5     | High mobility group nucleosome-binding domain-containing protein 5 (Fragment) |
| 0.988           | 0.986        | 0.967        | 0.913        | 0.929        | 1.010        | 0.957        | 0.800        | 0.917        | 1.089         | 0.960         | 1.065         | P82970       | HMGN5     | High mobility group nucleosome-binding domain-containing protein 5            |
| 1.054           | 1.037        | 1.015        | 1.009        | 0.889        | 0.990        | 1.142        | 1.034        | 1.004        | 1.092         | 1.060         | 1.070         | Q9NP66       | HMG20A    | High mobility group protein 20A                                               |
| 0.991           | 1.023        | 0.973        | 0.983        | 0.932        | 0.943        | 0.904        | 1.008        | 0.939        | 0.863         | 0.999         | 0.818         | P09429       | HMGB1     | High mobility group protein B1                                                |
| 1.036           | 1.004        | 1.002        | 0.972        | 1.034        | 0.994        | 0.899        | 0.813        | 0.936        | 0.917         | 1.038         | 0.896         | P26583       | HMGB2     | High mobility group protein B2                                                |
| 1.025           | 1.025        | 0.974        | 1.003        | 0.997        | 0.969        | 0.967        | 1.027        | 0.972        | 0.939         | 1.017         | 0.899         | O15347       | HMGB3     | High mobility group protein B3                                                |
| 1.017           | 0.981        | 0.968        | 0.898        | 0.920        | 0.917        | 0.999        | 0.894        | 0.820        | 1.161         | 0.911         | 0.893         | P17096       | HMGA1     | High mobility group protein HMG-I/HMG-Y                                       |
| 1.043           | 0.887        | 0.900        | 0.745        | 0.924        | 0.891        | 1.046        | 0.777        | 0.802        | 1.260         | 0.711         | 0.779         | F5H2A4       | HMGA2     | High mobility group protein HMGI-C                                            |
| 0.949           | 0.978        | 0.995        | 0.971        | 0.935        | 0.985        | 1.015        | 0.977        | 0.963        | 1.005         | 0.918         | 1.040         | P37235       | HPCAL1    | Hippocalcin-like protein 1                                                    |
| 0.975           | 1.029        | 1.026        | 0.932        | 0.934        | 0.970        | 1.042        | 0.974        | 1.015        |               |               |               | Q9BW71       | HIRIP3    | HIRA-interacting protein 3                                                    |
|                 |              |              |              |              |              |              |              |              | 0.996         | 1.239         | 0.932         | O95568       | METTL18   | Histidine protein methyltransferase 1 homolog                                 |
| 1.088           | 0.991        | 1.009        | 1.026        | 1.290        | 0.945        | 1.045        | 0.935        | 1.055        | 0.949         | 0.976         | 0.945         | P49773       | HINT1     | Histidine triad nucleotide-binding protein 1                                  |

| Abundance Ratio |              |              |              |              |              |              |              |              |               |               |               | Accession ID | Gene name  | Protein Description                                         |
|-----------------|--------------|--------------|--------------|--------------|--------------|--------------|--------------|--------------|---------------|---------------|---------------|--------------|------------|-------------------------------------------------------------|
| 1 d<br>M1/C1    | 1 d<br>M2/C2 | 1 d<br>M3/C3 | 4 d<br>M1/C1 | 4 d<br>M2/C2 | 4 d<br>M3/C3 | 7 d<br>M1/C1 | 7 d<br>M2/C2 | 7 d<br>M3/C3 | 10 d<br>M1/C1 | 10 d<br>M2/C2 | 10 d<br>M3/C3 |              |            |                                                             |
| 1.074           | 1.029        | 1.023        | 0.999        | 0.977        | 0.987        | 0.989        | 1.017        | 1.041        | 1.030         | 1.019         | 0.979         | Q9BX68       | HINT2      | Histidine triad nucleotide-binding protein 2, mitochondrial |
| 0.954           | 0.996        | 1.120        | 0.982        | 0.999        | 0.993        | 1.033        | 1.097        | 1.073        | 0.986         | 1.018         | 1.016         | Q9NQE9       | HINT3      | Histidine triad nucleotide-binding protein 3                |
| 1.259           | 1.092        | 0.844        | 0.979        | 1.054        | 1.053        |              |              |              |               |               |               | P04196       | HRG        | Histidine-rich glycoprotein                                 |
| 0.983           | 0.977        | 1.016        | 1.004        | 0.981        | 1.019        | 0.991        | 1.013        | 1.031        | 1.010         | 1.005         | 1.014         | P12081       | HARS       | Histidine--tRNA ligase, cytoplasmic                         |
| 1.005           | 1.018        | 1.017        | 0.925        | 0.971        | 1.017        | 0.994        | 1.136        | 1.033        | 0.960         | 1.021         | 1.053         | Q92830       | KAT2A      | Histone acetyltransferase KAT2A                             |
|                 |              |              | 0.981        | 1.283        | 1.239        | 0.683        | 1.086        | 0.758        | 1.061         | 0.774         | 0.769         | Q92794       | KAT6A      | Histone acetyltransferase KAT6A                             |
| 1.152           | 1.144        | 1.233        |              |              |              |              |              |              |               |               |               | Q8WYB5       | KAT6B      | Histone acetyltransferase KAT6B                             |
| 0.970           | 0.975        | 1.014        | 0.991        | 0.979        | 1.005        | 0.978        | 0.983        | 0.975        | 0.971         | 1.045         | 1.001         | O95251       | KAT7       | Histone acetyltransferase KAT7                              |
| 1.048           | 0.995        | 0.954        | 0.957        | 0.996        | 1.042        | 1.036        | 0.945        | 1.020        | 1.013         | 0.965         | 1.081         | Q09472       | EP300      | Histone acetyltransferase p300                              |
| 0.970           | 0.974        | 0.987        | 0.958        | 0.920        | 0.984        | 0.947        | 1.090        | 1.091        | 0.917         | 0.909         | 1.000         | O14929       | HAT1       | Histone acetyltransferase type B catalytic subunit          |
| 1.008           | 0.972        | 1.021        | 1.053        | 0.970        | 1.066        | 1.129        | 1.173        | 0.971        | 0.957         | 1.073         | 0.947         | Q9Y294       | ASF1A      | Histone chaperone ASF1A                                     |
| 0.986           | 1.039        | 0.987        | 1.020        | 1.099        | 0.975        | 1.029        | 0.957        | 0.985        | 1.053         | 0.984         | 1.046         | Q13547       | HDAC1      | Histone deacetylase 1                                       |
|                 |              |              | 0.952        | 0.930        | 1.247        |              |              |              |               |               |               | Q969S8       | HDAC10     | Histone deacetylase 10                                      |
| 1.001           | 1.079        | 0.955        | 1.012        | 1.107        | 0.977        | 1.031        | 1.011        | 1.011        | 0.984         | 1.013         | 1.019         | Q92769       | HDAC2      | Histone deacetylase 2                                       |
| 0.961           | 0.981        | 1.014        | 0.959        | 0.938        | 0.990        | 1.017        | 0.998        | 0.988        | 1.015         | 0.891         | 1.000         | Q9UBN7       | HDAC6      | Histone deacetylase 6                                       |
| 1.043           | 1.062        | 1.017        | 0.970        | 0.936        | 0.974        | 0.977        | 1.096        | 0.957        | 0.957         | 0.960         | 0.987         | Q9BY41       | HDAC8      | Histone deacetylase 8                                       |
| 1.026           | 0.991        | 1.000        | 0.989        | 0.966        | 1.014        | 0.978        | 0.933        | 0.955        | 0.993         | 1.024         | 1.025         | X6RAL5       | SAP18      | Histone deacetylase complex subunit SAP18                   |
| 1.068           | 1.053        | 0.977        | 1.063        | 0.931        | 1.003        | 1.061        | 1.093        | 0.998        | 1.038         | 0.968         | 1.000         | O75446       | SAP30      | Histone deacetylase complex subunit SAP30                   |
| 1.091           | 1.015        | 1.067        | 1.019        | 0.881        | 1.036        | 1.031        | 0.941        | 1.005        | 1.013         | 1.027         | 1.077         | Q9HAJ7       | SAP30L     | Histone deacetylase complex subunit SAP30L                  |
| 0.974           | 0.952        | 1.048        | 1.017        | 0.993        | 1.016        | 1.013        | 0.997        | 0.983        | 1.026         | 0.971         | 1.083         | J3KPH8       | HDAC7      | Histone deacetylase                                         |
| 0.965           | 0.988        | 0.956        | 0.941        | 0.929        | 0.989        | 0.913        | 0.879        | 0.929        | 0.938         | 0.937         | 0.912         | P07305       | H1FO       | Histone H1.0                                                |
| 1.033           | 0.875        | 0.969        | 0.671        | 0.994        | 0.963        | 0.864        | 0.456        | 0.795        | 1.072         | 1.003         | 0.801         | P16403       | HIST1H1C   | Histone H1.2                                                |
| 1.145           | 0.959        | 0.986        | 1.015        | 0.913        | 1.007        | 0.973        | 0.831        | 0.943        | 1.050         | 0.987         | 0.851         | P16402       | HIST1H1D   | Histone H1.3                                                |
| 1.092           | 0.809        | 1.050        | 0.524        | 1.032        | 0.994        | 0.743        | 0.272        | 0.769        | 0.859         | 0.897         | 0.519         | P10412       | HIST1H1E   | Histone H1.4                                                |
| 1.044           | 0.953        | 0.986        | 0.860        | 0.951        | 0.961        | 0.888        | 0.736        | 0.883        | 0.988         | 0.984         | 0.845         | P16401       | HIST1H1B   | Histone H1.5                                                |
| 0.486           | 0.789        | 1.568        | 0.439        | 0.959        | 1.910        | 0.420        | 1.000        | 1.459        | 0.765         | 0.603         | 1.291         | Q8IZA3       | H1FOO      | Histone H1oo                                                |
| 1.056           | 0.983        | 1.013        | 0.966        | 1.003        | 1.057        | 0.896        | 0.865        | 0.919        | 0.948         | 1.042         | 0.926         | Q92522       | H1FX       | Histone H1x                                                 |
| 0.831           | 0.900        | 0.896        |              |              |              | 0.909        | 1.159        | 1.048        | 1.048         | 1.009         | 1.148         | Q5VVJ2       | MYSM1      | Histone H2A deubiquitinase MYSM1                            |
| 1.271           | 0.994        | 1.100        | 1.078        | 1.000        | 0.977        | 0.943        | 0.900        | 1.005        | 0.966         | 0.957         | 0.845         | P04908       | HIST1H2AB  | Histone H2A type 1-B/E                                      |
| 1.011           | 1.051        | 0.871        | 0.976        | 0.998        | 1.168        | 0.935        | 0.958        | 1.316        | 0.856         | 0.893         | 1.168         | Q6FI13       | HIST2H2AA3 | Histone H2A type 2-A                                        |
| 0.978           | 0.957        | 1.053        | 0.858        | 0.986        | 1.065        | 0.775        | 0.542        | 0.857        | 0.928         | 0.998         | 0.924         | Q8IUE6       | HIST2H2AB  | Histone H2A type 2-B                                        |
| 1.050           | 0.998        | 1.003        | 0.999        | 0.946        | 0.988        | 1.000        | 1.046        | 0.998        | 0.934         | 0.958         | 0.948         | P0C0S5       | H2AFZ      | Histone H2A.Z                                               |
| 1.139           | 1.062        | 1.081        | 1.016        | 1.005        | 1.073        | 0.961        | 1.025        | 1.000        | 1.032         | 0.989         | 0.969         | P0C5Z0       | H2AFB2     | Histone H2A-Bbd type 2/3                                    |



| Abundance Ratio |              |              |              |              |              |              |              |              |               |               |               | Accession ID | Gene name  | Protein Description                                 |
|-----------------|--------------|--------------|--------------|--------------|--------------|--------------|--------------|--------------|---------------|---------------|---------------|--------------|------------|-----------------------------------------------------|
| 1 d<br>M1/C1    | 1 d<br>M2/C2 | 1 d<br>M3/C3 | 4 d<br>M1/C1 | 4 d<br>M2/C2 | 4 d<br>M3/C3 | 7 d<br>M1/C1 | 7 d<br>M2/C2 | 7 d<br>M3/C3 | 10 d<br>M1/C1 | 10 d<br>M2/C2 | 10 d<br>M3/C3 |              |            |                                                     |
| 1.149           | 0.928        | 1.031        | 1.095        | 0.850        | 0.919        | 0.876        | 0.771        | 0.920        | 0.976         | 0.922         | 0.891         | P16104       | H2AFX      | Histone H2AX                                        |
| 0.974           | 0.981        | 1.137        | 0.920        | 0.908        | 1.097        | 0.923        | 1.116        | 0.940        | 1.008         | 1.090         | 1.033         | Q96A08       | HIST1H2BA  | Histone H2B type 1-A                                |
| 1.151           | 1.024        | 0.901        | 1.070        | 0.961        | 0.913        | 0.992        | 0.955        | 0.869        | 1.049         | 1.020         | 0.840         | P06899       | HIST1H2BJ  | Histone H2B type 1-J                                |
| 1.031           | 0.966        | 0.976        | 1.041        | 0.987        | 1.034        | 1.021        | 0.912        | 0.968        | 1.004         | 1.021         | 0.948         | Q99880       | HIST1H2BL  | Histone H2B type 1-L                                |
| 1.202           | 0.931        | 1.001        | 0.932        | 0.848        | 0.997        | 0.973        | 0.935        | 0.972        | 0.985         | 0.949         | 0.907         | Q8N257       | HIST3H2BB  | Histone H2B type 3-B                                |
| 1.050           | 1.023        | 0.984        | 0.985        | 1.092        | 0.984        | 0.985        | 0.977        | 1.003        | 0.956         | 0.990         | 0.951         | Q5TEC6       | HIST2H3PS2 | Histone H3                                          |
| 1.129           | 0.933        | 1.007        | 1.145        | 1.043        | 0.990        | 1.105        | 0.808        | 0.994        | 1.026         | 0.956         | 0.885         | P68431       | HIST1H3A   | Histone H3.1                                        |
|                 |              |              |              |              |              |              |              |              | 0.795         | 0.956         | 1.002         | Q16695       | HIST3H3    | Histone H3.1t                                       |
| 1.493           | 1.088        | 1.199        | 1.164        | 2.038        | 1.135        | 1.024        | 0.745        | 1.347        | 0.839         | 1.056         | 0.795         | Q71DI3       | HIST2H3A   | Histone H3.2                                        |
| 1.123           | 1.012        | 1.057        | 1.157        | 2.191        | 0.980        | 0.971        | 0.750        | 1.164        | 0.926         | 0.984         | 0.966         | P84243       | H3F3A      | Histone H3.3                                        |
| 1.258           | 0.719        | 1.230        | 0.957        | 0.727        | 0.928        | 1.099        | 0.550        | 0.948        | 0.988         | 0.345         | 1.195         | P49450       | CENPA      | Histone H3-like centromeric protein A               |
| 1.043           | 0.998        | 0.976        | 1.054        | 0.940        | 0.984        | 1.011        | 1.019        | 0.952        | 0.931         | 0.988         | 0.870         | P62805       | HIST1H4A   | Histone H4                                          |
| 1.020           | 1.007        | 1.070        | 1.058        | 0.929        | 1.036        | 1.035        | 1.027        | 0.943        | 1.059         | 1.029         | 1.039         | Q9UPP1       | PHF8       | Histone lysine demethylase PHF8                     |
| 1.028           | 1.024        | 1.048        | 0.997        | 1.023        | 1.021        | 1.035        | 1.109        | 1.022        | 1.024         | 0.984         | 1.061         | Q9NWW4       | HPF1       | Histone PARylation factor 1                         |
|                 |              |              | 1.091        | 0.914        | 1.040        | 1.202        | 1.062        | 0.980        | 0.985         | 1.042         | 1.143         | F8W8D3       | SLBP       | Histone RNA hairpin-binding protein                 |
| 1.014           | 0.984        | 1.020        | 0.981        | 0.963        | 0.992        | 1.003        | 0.997        | 1.028        | 0.963         | 0.995         | 1.006         | Q86X55       | CARM1      | Histone-arginine methyltransferase CARM1            |
| 0.993           | 0.992        | 0.993        | 0.976        | 0.967        | 0.976        | 1.024        | 1.050        | 1.006        | 0.997         | 0.989         | 1.013         | Q09028       | RBBP4      | Histone-binding protein RBBP4                       |
| 0.935           | 1.014        | 0.970        | 1.033        | 0.947        | 0.983        | 1.111        | 1.104        | 0.961        | 1.068         | 0.932         | 1.126         | Q16576       | RBBP7      | Histone-binding protein RBBP7                       |
| 1.002           | 1.107        | 1.082        | 0.994        | 0.948        | 0.918        | 0.828        | 1.191        | 0.935        | 0.967         | 1.025         | 1.065         | Q9UMN6       | KMT2B      | Histone-lysine N-methyltransferase 2B               |
| 1.001           | 0.965        | 1.007        | 0.860        | 0.910        | 1.255        | 1.086        | 0.840        | 0.896        | 1.090         | 1.106         | 1.370         | A0A1B0GU48   | EHMT1      | Histone-lysine N-methyltransferase EHMT1 (Fragment) |
| 1.036           | 1.094        | 1.041        | 1.042        | 1.025        | 1.059        | 1.024        | 0.964        | 1.011        | 1.080         | 0.970         | 1.098         | Q9H9B1       | EHMT1      | Histone-lysine N-methyltransferase EHMT1            |
| 0.994           | 0.970        | 0.971        | 1.050        | 1.089        | 1.060        | 1.068        | 0.893        | 1.024        | 1.097         | 0.993         | 1.113         | A0A0G2JK64   | EHMT2      | Histone-lysine N-methyltransferase EHMT2            |
| 0.931           | 0.947        | 1.099        | 0.950        | 0.928        | 1.063        | 0.936        | 1.119        | 1.064        | 0.892         | 1.013         | 0.941         | Q86Y97       | KMT5C      | Histone-lysine N-methyltransferase KMT5C            |
| 1.021           | 1.035        | 1.005        | 0.907        | 1.001        | 0.959        | 0.997        | 1.064        | 1.005        | 1.047         | 0.979         | 1.164         | O96028       | NSD2       | Histone-lysine N-methyltransferase NSD2             |
| 1.085           | 1.000        | 1.233        | 1.024        | 0.978        | 1.100        |              |              |              | 0.866         | 0.830         | 1.294         | Q9BZ95       | NSD3       | Histone-lysine N-methyltransferase NSD3             |
| 0.996           | 0.945        | 1.010        | 1.029        | 0.893        | 1.031        | 1.029        | 1.044        | 0.951        | 1.050         | 1.037         | 1.175         | O15047       | SETD1A     | Histone-lysine N-methyltransferase SETD1A           |
|                 |              |              |              |              |              |              |              |              | 1.078         | 0.980         | 0.862         | Q9UPS6       | SETD1B     | Histone-lysine N-methyltransferase SETD1B           |
| 1.011           | 0.994        | 1.023        | 1.003        | 1.028        | 1.030        | 1.092        | 0.955        | 0.979        | 1.049         | 1.108         | 1.273         | Q9BYW2       | SETD2      | Histone-lysine N-methyltransferase SETD2            |
| 0.924           | 0.969        | 0.994        | 0.989        | 0.974        | 1.041        | 1.019        | 1.024        | 1.016        | 1.058         | 0.978         | 1.208         | Q86TU7       | SETD3      | Histone-lysine N-methyltransferase setd3            |
| 1.069           | 1.076        | 1.057        | 1.032        | 0.906        | 1.050        | 1.046        | 1.013        | 1.052        | 1.008         | 0.976         | 1.056         | Q8WTS6       | SETD7      | Histone-lysine N-methyltransferase SETD7            |
| 1.043           | 1.022        | 1.014        | 0.986        | 1.007        | 1.064        | 1.023        | 1.023        | 1.001        | 0.956         | 1.011         | 1.084         | Q15047       | SETDB1     | Histone-lysine N-methyltransferase SETDB1           |
| 1.209           | 0.968        | 1.090        | 0.949        | 1.074        | 1.071        | 1.159        | 1.204        | 1.016        | 1.074         | 1.031         | 1.155         | Q53H47       | SETMAR     | Histone-lysine N-methyltransferase SETMAR           |
| 0.964           | 0.982        | 1.040        | 0.955        | 0.962        | 1.098        | 0.977        | 1.060        | 1.019        | 1.071         | 1.003         | 1.191         | Q9H7B4       | SMYD3      | Histone-lysine N-methyltransferase SMYD3            |

| Abundance Ratio |              |              |              |              |              |              |              |              |               |               |               | Accession ID | Gene name | Protein Description                                                                           |
|-----------------|--------------|--------------|--------------|--------------|--------------|--------------|--------------|--------------|---------------|---------------|---------------|--------------|-----------|-----------------------------------------------------------------------------------------------|
| 1 d<br>M1/C1    | 1 d<br>M2/C2 | 1 d<br>M3/C3 | 4 d<br>M1/C1 | 4 d<br>M2/C2 | 4 d<br>M3/C3 | 7 d<br>M1/C1 | 7 d<br>M2/C2 | 7 d<br>M3/C3 | 10 d<br>M1/C1 | 10 d<br>M2/C2 | 10 d<br>M3/C3 |              |           |                                                                                               |
|                 |              |              |              |              |              |              |              |              | 1.011         | 1.028         | 1.194         | Q9H5I1       | SUV39H2   | Histone-lysine N-methyltransferase SUV39H2                                                    |
| 1.401           | 1.063        | 1.340        |              |              |              |              |              |              |               |               |               | Q96L73       | NSD1      | Histone-lysine N-methyltransferase, H3 lysine-36 and H4 lysine-20 specific                    |
| 0.972           | 0.968        | 1.006        | 0.959        | 0.991        | 1.005        | 0.940        | 0.760        | 1.002        | 1.020         | 0.989         | 1.069         | O43719       | HTATSF1   | HIV Tat-specific factor 1                                                                     |
| 0.921           | 1.006        | 1.004        | 1.009        | 0.941        | 1.005        | 0.994        | 1.010        | 0.994        | 1.012         | 1.018         | 1.037         | A0A0G2JIF2   | HLA-A     | HLA class I histocompatibility antigen, A-3 alpha chain                                       |
| 0.999           | 0.960        | 1.002        | 1.000        | 0.931        | 1.006        | 1.076        | 1.045        | 1.024        | 1.063         | 0.978         | 1.074         | P13747       | HLA-E     | HLA class I histocompatibility antigen, alpha chain E                                         |
| 1.007           | 1.024        | 1.003        | 1.017        | 0.950        | 1.001        | 1.058        | 0.938        | 0.999        | 1.082         | 1.016         | 1.067         | P30466       | HLA-B     | HLA class I histocompatibility antigen, B-18 alpha chain                                      |
| 0.999           | 1.033        | 1.017        | 1.034        | 1.045        | 1.081        | 1.034        | 0.958        | 0.969        | 1.030         | 1.039         | 1.049         | A0A0G2JH50   | HLA-C     | HLA class I histocompatibility antigen, Cw-6 alpha chain                                      |
| 1.063           | 1.082        | 0.982        | 0.987        | 0.952        | 0.995        | 1.007        | 1.055        | 1.019        | 0.982         | 1.055         | 0.983         | A0A0G2JJD3   | ABHD16A   | HLA-B associated transcript 5, isoform CRA_b                                                  |
| 0.960           | 1.054        | 1.046        | 0.929        | 1.032        | 1.006        | 0.961        | 0.930        | 1.088        |               |               |               | Q8WY36       | BBX       | HMG box transcription factor BBX                                                              |
| 1.078           | 1.010        | 1.050        | 0.962        | 0.946        | 1.006        | 0.931        | 1.059        | 1.027        | 0.912         | 0.984         | 1.029         | Q9UGU5       | HMGXB4    | HMG domain-containing protein 4                                                               |
|                 |              |              | 1.044        | 0.908        | 1.033        |              |              |              |               |               |               | Q8NCD3       | HJURP     | Holliday junction recognition protein                                                         |
| 1.050           | 0.875        | 1.034        | 1.109        | 1.167        | 1.147        | 1.014        | 0.887        | 1.099        | 1.427         | 1.120         | 1.356         | Q00056       | HOXA4     | Homeobox protein Hox-A4                                                                       |
|                 |              |              | 1.006        | 0.799        | 0.963        | 0.941        | 0.918        | 0.974        | 0.918         | 0.896         | 1.130         | P17483       | HOXB4     | Homeobox protein Hox-B4                                                                       |
| 0.756           | 0.943        | 0.829        | 0.812        | 0.980        | 0.845        |              |              |              |               |               |               | F5GYS8       | MEIS1     | Homeobox protein Meis1                                                                        |
|                 |              |              |              |              |              | 0.833        | 1.112        | 0.851        | 1.010         | 0.986         | 1.002         | P32242       | OTX1      | Homeobox protein OTX1                                                                         |
| 0.982           | 0.981        | 0.955        | 0.975        | 0.935        | 1.117        | 1.072        | 0.781        | 1.021        | 1.040         | 1.042         | 1.186         | P55347       | PKNOX1    | Homeobox protein PKNOX1                                                                       |
| 1.071           | 1.261        | 1.325        | 1.048        | 0.891        | 1.057        | 1.011        | 1.409        | 1.078        | 0.803         | 1.001         | 0.978         | Q9UIU6       | SIX4      | Homeobox protein SIX4                                                                         |
| 1.047           | 1.068        | 1.238        | 0.953        | 0.899        | 0.899        |              |              |              |               |               |               | Q8N196       | SIX5      | Homeobox protein SIX5                                                                         |
| 0.967           | 0.891        | 1.062        | 0.973        | 0.900        | 1.016        | 0.997        | 0.999        | 0.980        | 1.006         | 1.072         | 0.944         | Q15583       | TGIF1     | Homeobox protein TGIF1                                                                        |
|                 |              |              | 0.937        | 0.720        | 1.443        |              |              |              |               |               |               | Q86YM7       | HOMER1    | Homer protein homolog 1                                                                       |
| 1.075           | 1.040        | 1.029        | 1.005        | 0.959        | 0.974        | 0.945        | 1.068        | 0.955        | 0.977         | 1.115         | 0.962         | Q9NSB8       | HOMER2    | Homer protein homolog 2                                                                       |
| 1.000           | 0.957        | 1.004        | 1.026        | 0.988        | 1.026        | 1.032        | 1.019        | 1.035        | 1.042         | 0.969         | 1.092         | Q9NSC5       | HOMER3    | Homer protein homolog 3                                                                       |
|                 |              |              | 0.800        | 0.966        | 1.301        | 0.917        | 0.805        | 1.259        | 0.808         | 0.943         | 1.325         | Q15011       | HERPUD1   | Homocysteine-responsive endoplasmic reticulum-resident ubiquitin-like domain member 1 protein |
| 0.811           | 0.932        | 0.991        | 1.057        | 1.026        | 1.103        | 1.051        | 1.081        | 0.959        |               |               |               | Q9BSE4       | HERPUD2   | Homocysteine-responsive endoplasmic reticulum-resident ubiquitin-like domain member 2 protein |
| 1.036           | 1.022        | 0.974        | 1.002        | 0.900        | 1.144        |              |              |              | 0.783         | 0.977         | 1.020         | Q9P2W1       | PSMC3IP   | Homologous-pairing protein 2 homolog                                                          |
|                 |              |              |              |              |              |              |              |              | 1.317         | 1.067         | 1.149         | Q05469       | LIPE      | Hormone-sensitive lipase                                                                      |
| 1.004           | 0.756        | 1.025        | 1.131        | 0.947        | 0.513        | 0.970        | 0.666        | 0.592        | 1.017         | 2.231         | 0.765         | Q86YZ3       | HRNR      | Hornerin                                                                                      |
| 1.016           | 1.013        | 1.001        | 1.007        | 1.040        | 0.982        | 1.008        | 1.010        | 1.011        | 1.005         | 0.992         | 1.000         | A6NEM2       | HCFC1     | Host cell factor 1                                                                            |
| 0.922           | 0.927        | 1.033        | 1.037        | 1.124        | 1.058        | 1.002        | 1.218        | 1.011        | 1.073         | 1.083         | 1.140         | P51610       | HCFC1     | Host cell factor 1                                                                            |

| Abundance Ratio |              |              |              |              |              |              |              |              |               |               |               | Accession ID | Gene name | Protein Description                                 |
|-----------------|--------------|--------------|--------------|--------------|--------------|--------------|--------------|--------------|---------------|---------------|---------------|--------------|-----------|-----------------------------------------------------|
| 1 d<br>M1/C1    | 1 d<br>M2/C2 | 1 d<br>M3/C3 | 4 d<br>M1/C1 | 4 d<br>M2/C2 | 4 d<br>M3/C3 | 7 d<br>M1/C1 | 7 d<br>M2/C2 | 7 d<br>M3/C3 | 10 d<br>M1/C1 | 10 d<br>M2/C2 | 10 d<br>M3/C3 |              |           |                                                     |
|                 |              |              | 0.726        | 1.195        | 0.905        |              |              |              |               |               |               | Q9Y5Z7       | HCFC2     | Host cell factor 2                                  |
| 0.978           | 0.985        | 0.973        | 1.001        | 1.013        | 0.994        | 0.978        | 0.994        | 0.967        | 0.969         | 1.006         | 0.945         | P50502       | ST13      | Hsc70-interacting protein                           |
| 0.959           | 1.006        | 0.983        | 0.998        | 1.002        | 0.988        | 1.003        | 0.973        | 0.985        | 1.011         | 0.989         | 1.045         | Q16543       | CDC37     | Hsp90 co-chaperone Cdc37                            |
| 0.951           | 1.099        | 1.026        | 1.078        | 0.933        | 1.022        | 1.021        | 1.196        | 1.033        | 1.025         | 1.071         | 1.075         | Q96EW2       | HSPBAP1   | HSPB1-associated protein 1                          |
| 1.011           | 1.004        | 1.012        | 1.000        | 0.984        | 1.016        | 1.017        | 1.068        | 1.017        | 0.980         | 0.993         | 1.041         | P42858       | HTT       | Huntingtin                                          |
| 0.949           | 0.981        | 1.023        | 0.940        | 0.947        | 0.986        | 0.972        | 0.953        | 0.968        | 1.010         | 0.948         | 1.042         | O00291       | HIP1      | Huntingtin-interacting protein 1                    |
| 1.014           | 0.953        | 1.038        | 0.993        | 0.963        | 1.033        | 0.973        | 0.998        | 0.982        | 1.017         | 0.971         | 1.059         | O75146       | HIP1R     | Huntingtin-interacting protein 1-related protein    |
| 0.989           | 0.992        | 0.967        | 1.027        | 0.956        | 1.023        | 0.999        | 0.993        | 0.963        | 0.954         | 1.030         | 0.959         | Q9NX55       | HYPK      | Huntingtin-interacting protein K                    |
| 1.126           | 1.040        | 1.141        | 1.157        | 1.101        | 1.043        |              |              |              | 1.154         | 0.759         | 1.300         | O00219       | HAS3      | Hyaluronan synthase 3                               |
| 1.025           | 0.996        | 1.037        | 0.973        | 0.958        | 1.006        | 1.043        | 1.015        | 0.981        | 1.020         | 0.989         | 1.050         | Q14520       | HABP2     | Hyaluronan-binding protein 2                        |
|                 |              |              | 0.897        | 0.991        | 1.259        | 1.032        | 0.988        | 0.885        | 1.297         | 1.046         | 1.354         | Q9UJM8       | HAO1      | Hydroxyacid oxidase 1                               |
| 0.965           | 0.987        | 0.950        | 0.978        | 0.955        | 0.988        | 0.979        | 1.007        | 0.977        | 1.005         | 0.997         | 0.962         | A0A0A0MSE2   | HADH      | Hydroxyacyl-coenzyme A dehydrogenase, mitochondrial |
| 0.980           | 0.957        | 1.000        | 1.026        | 0.966        | 1.041        | 1.028        | 0.976        | 1.037        | 1.063         | 0.964         | 1.043         | Q16775       | HAGH      | Hydroxyacylglutathione hydrolase, mitochondrial     |
| 1.027           | 0.984        | 1.021        | 0.986        | 1.030        | 0.985        | 0.972        | 0.913        | 1.008        | 0.963         | 0.991         | 0.955         | P35914       | HMGCL     | Hydroxymethylglutaryl-CoA lyase, mitochondrial      |
| 1.004           | 1.045        | 1.026        | 1.090        | 1.035        | 1.037        | 1.133        | 1.143        | 1.062        | 1.158         | 1.233         | 1.015         | Q01581       | HMGCS1    | Hydroxymethylglutaryl-CoA synthase, cytoplasmic     |
| 1.022           | 0.995        | 1.004        | 1.012        | 1.047        | 0.994        | 0.993        | 0.950        | 0.997        | 0.986         | 0.997         | 0.975         | Q6YN16       | HSDL2     | Hydroxysteroid dehydrogenase-like protein 2         |
| 1.041           | 1.012        | 0.998        | 0.997        | 1.039        | 0.995        | 0.998        | 1.065        | 1.010        | 0.974         | 0.992         | 0.978         | P00492       | HPRT1     | Hypoxanthine-guanine phosphoribosyltransferase      |
| 0.987           | 1.008        | 0.997        | 1.007        | 1.004        | 0.994        | 1.005        | 0.988        | 0.996        | 0.982         | 0.980         | 1.006         | Q9Y4L1       | HYOU1     | Hypoxia up-regulated protein 1                      |
| 1.039           | 0.981        | 1.030        | 0.994        | 0.945        | 0.957        | 1.011        | 1.045        | 0.995        | 0.993         | 0.949         | 0.894         | Q9NWT6       | HIF1AN    | Hypoxia-inducible factor 1-alpha inhibitor          |
| 0.991           | 1.004        | 1.306        | 0.918        | 0.841        | 1.074        |              |              |              | 0.991         | 1.047         | 1.345         | K4DIA0       | ICOSLG    | ICOS ligand                                         |
| 1.059           | 0.974        | 1.066        | 0.993        | 0.913        | 1.033        | 1.011        | 1.078        | 1.089        | 1.094         | 1.087         | 1.087         | P22304       | IDS       | Iduronate 2-sulfatase                               |
| 0.931           | 0.968        | 0.955        | 1.013        | 1.029        | 1.112        | 0.940        | 1.049        | 1.075        | 1.088         | 0.951         | 1.020         | P55899       | FCGRT     | IgG receptor FcRn large subunit p51                 |
| 0.942           | 1.000        | 0.948        | 0.873        | 0.855        | 0.913        | 0.891        | 1.056        | 0.974        | 0.950         | 0.946         | 0.917         | Q9Y5U9       | IER3IP1   | Immediate early response 3-interacting protein 1    |
| 0.867           | 0.906        | 0.982        | 0.890        | 0.978        | 0.964        | 0.829        | 0.712        | 0.972        | 1.016         | 0.926         | 1.082         | Q9GZP8       | IMUP      | Immortalization up-regulated protein                |
| 1.018           | 1.024        | 1.022        | 1.023        | 0.976        | 1.054        | 1.048        | 1.008        | 0.996        | 1.052         | 1.007         | 1.084         | Q8WZA9       | IRGQ      | Immunity-related GTPase family Q protein            |
| 0.928           | 1.006        | 0.972        | 0.940        | 0.924        | 1.051        | 1.048        | 1.222        | 1.028        | 0.906         | 0.943         | 1.000         | O75054       | IGSF3     | Immunoglobulin superfamily member 3                 |
|                 |              |              |              |              |              | 1.199        | 1.013        | 1.104        |               |               |               | Q969P0       | IGSF8     | Immunoglobulin superfamily member 8                 |
| 1.001           | 0.976        | 0.998        | 0.970        | 0.977        | 1.021        | 1.004        | 1.015        | 1.013        | 1.047         | 1.022         | 1.083         | P78318       | IGBP1     | Immunoglobulin-binding protein 1                    |
| 0.933           | 1.038        | 1.017        | 1.023        | 0.944        | 1.007        | 1.029        | 1.140        | 1.042        | 0.928         | 0.934         | 1.036         | P52292       | KPNA2     | Importin subunit alpha-1                            |
| 1.003           | 1.008        | 1.057        | 0.997        | 1.009        | 0.986        | 1.014        | 0.998        | 1.016        | 0.965         | 1.002         | 1.029         | O00629       | KPNA4     | Importin subunit alpha-3                            |
| 0.956           | 0.996        | 0.947        | 0.961        | 0.987        | 1.008        | 0.975        | 1.114        | 1.036        | 0.959         | 0.973         | 1.008         | O00505       | KPNA3     | Importin subunit alpha-4                            |

| Abundance Ratio |              |              |              |              |              |              |              |              |               |               |               | Accession ID | Gene name | Protein Description                                          |
|-----------------|--------------|--------------|--------------|--------------|--------------|--------------|--------------|--------------|---------------|---------------|---------------|--------------|-----------|--------------------------------------------------------------|
| 1 d<br>M1/C1    | 1 d<br>M2/C2 | 1 d<br>M3/C3 | 4 d<br>M1/C1 | 4 d<br>M2/C2 | 4 d<br>M3/C3 | 7 d<br>M1/C1 | 7 d<br>M2/C2 | 7 d<br>M3/C3 | 10 d<br>M1/C1 | 10 d<br>M2/C2 | 10 d<br>M3/C3 |              |           |                                                              |
| 0.933           | 1.011        | 0.993        | 1.064        | 1.040        | 1.010        | 1.012        | 0.988        | 1.014        | 0.984         | 1.032         | 1.056         | P52294       | KPNA1     | Importin subunit alpha-5                                     |
|                 |              |              | 0.981        | 0.887        | 1.023        | 0.907        | 1.035        | 1.063        |               |               |               | O15131       | KPNA5     | Importin subunit alpha-6                                     |
| 1.006           | 0.986        | 1.053        | 1.023        | 1.077        | 0.995        | 0.991        | 1.041        | 1.064        | 0.979         | 0.984         | 1.019         | O60684       | KPNA6     | Importin subunit alpha-7                                     |
|                 |              |              | 1.105        | 1.156        | 0.868        | 0.817        | 1.126        | 1.054        | 0.975         | 1.052         | 1.143         | J3QKQ5       | KPNB1     | Importin subunit beta-1 (Fragment)                           |
| 1.005           | 1.020        | 1.027        | 0.998        | 1.018        | 1.002        | 1.009        | 1.040        | 1.032        | 0.982         | 1.006         | 0.982         | Q14974       | KPNB1     | Importin subunit beta-1                                      |
|                 |              |              | 1.004        | 0.869        | 1.006        |              |              |              | 0.968         | 1.099         | 0.840         | O94829       | IPO13     | Importin-13                                                  |
| 1.000           | 1.005        | 0.994        | 0.997        | 0.968        | 1.022        | 1.000        | 1.099        | 1.046        | 0.947         | 1.011         | 0.969         | O95373       | IPO7      | Importin-7                                                   |
| 1.023           | 1.017        | 1.014        | 1.072        | 1.001        | 1.008        | 0.991        | 1.063        | 0.975        | 0.918         | 0.984         | 1.117         | O15397       | IPO8      | Importin-8                                                   |
| 0.980           | 0.993        | 0.973        | 0.968        | 0.944        | 1.032        | 1.012        | 1.067        | 1.029        | 1.022         | 1.021         | 1.015         | Q96P70       | IPO9      | Importin-9                                                   |
| 0.969           | 0.937        | 0.956        | 0.985        | 0.897        | 0.957        | 1.052        | 1.018        | 0.976        | 1.012         | 1.014         | 1.010         | Q3SXM5       | HSDL1     | Inactive hydroxysteroid dehydrogenase-like protein 1         |
|                 |              |              | 1.039        | 0.940        | 1.090        | 0.920        | 0.964        | 1.013        | 0.999         | 1.131         | 1.051         | Q6PJF5       | RHBDF2    | Inactive rhomboid protein 2                                  |
| 0.962           | 1.014        | 1.205        | 0.893        | 0.863        | 0.990        |              |              |              | 0.897         | 0.943         | 1.007         | Q8IV63       | VRK3      | Inactive serine/threonine-protein kinase VRK3                |
| 0.998           | 0.984        | 1.095        | 0.999        | 0.961        | 1.030        | 1.076        | 1.015        | 1.048        | 1.017         | 0.946         | 1.206         | Q01973       | ROR1      | Inactive tyrosine-protein kinase transmembrane receptor ROR1 |
| 1.145           | 1.144        | 0.955        | 0.965        | 0.849        | 1.027        | 1.049        | 1.018        | 1.085        | 1.688         | 1.035         | 0.962         | Q70EK8       | USP53     | Inactive ubiquitin carboxyl-terminal hydrolase 53            |
|                 |              |              | 1.053        | 0.909        | 1.102        |              |              |              |               |               |               | Q70EL1       | USP54     | Inactive ubiquitin carboxyl-terminal hydrolase 54            |
| 1.052           | 1.000        | 0.942        | 0.990        | 0.920        | 0.905        | 1.002        | 1.028        | 0.911        | 0.916         | 0.977         | 0.937         | Q9NUU6       | FAM105A   | Inactive ubiquitin thioesterase FAM105A                      |
| 1.004           | 0.971        | 1.071        | 0.972        | 0.997        | 1.054        | 0.988        | 1.071        | 0.993        | 0.978         | 1.000         | 1.054         | Q8NI35       | PATJ      | InaD-like protein                                            |
|                 |              |              |              |              |              | 1.103        | 1.139        | 1.065        |               |               |               | P14902       | IDO1      | Indoleamine 2,3-dioxygenase 1                                |
| 1.024           | 0.977        | 1.003        | 1.068        | 1.059        | 1.114        | 1.072        | 1.104        | 1.112        | 1.091         | 1.005         | 1.065         | Q07820       | MCL1      | Induced myeloid leukemia cell differentiation protein Mcl-1  |
| 1.082           | 1.039        | 0.918        | 1.046        | 0.968        | 1.008        | 0.981        | 1.054        | 0.992        | 0.977         | 0.935         | 1.026         | Q9Y6Y0       | IVNS1ABP  | Influenza virus NS1A-binding protein                         |
| 1.053           | 0.994        | 1.065        | 0.987        | 0.980        | 1.028        | 0.998        | 1.042        | 1.000        | 1.062         | 1.001         | 1.045         | Q9P2D0       | IBTK      | Inhibitor of Bruton tyrosine kinase                          |
|                 |              |              | 1.058        | 1.209        | 1.535        | 0.793        | 1.026        | 0.930        |               |               |               | Q9H160       | ING2      | Inhibitor of growth protein 2                                |
| 0.979           | 0.910        | 1.053        | 0.961        | 0.959        | 0.972        | 0.996        | 1.119        | 0.978        | 1.086         | 1.127         | 1.045         | Q9NXR8       | ING3      | Inhibitor of growth protein 3                                |
| 0.984           | 0.914        | 1.028        | 1.101        | 1.072        | 1.063        | 1.128        | 1.020        | 0.855        |               |               |               | Q9UNL4       | ING4      | Inhibitor of growth protein 4                                |
| 1.043           | 1.005        | 1.014        | 0.989        | 0.944        | 0.966        | 1.023        | 1.024        | 1.012        | 0.932         | 0.981         | 1.015         | A0A1B0GW41   | ING5      | Inhibitor of growth protein 5                                |
| 0.953           | 1.049        | 1.025        | 1.004        | 0.986        | 1.123        | 1.255        | 0.819        | 1.063        | 0.804         | 0.986         | 1.017         | A0A0C4DFW2   | ING1      | Inhibitor of growth protein                                  |
| 1.007           | 0.983        | 1.020        | 1.016        | 0.998        | 0.985        | 1.014        | 1.064        | 1.014        | 1.005         | 1.042         | 1.007         | O15111       | CHUK      | Inhibitor of nuclear factor kappa-B kinase subunit alpha     |
| 1.122           | 1.000        | 0.990        | 1.059        | 0.979        | 0.999        | 1.403        | 1.072        | 1.017        | 2.473         | 0.991         | 0.982         | O14920       | IKBKB     | Inhibitor of nuclear factor kappa-B kinase subunit beta      |
| 0.922           | 1.041        | 0.923        |              |              |              |              |              |              |               |               |               | Q14164       | IKBKE     | Inhibitor of nuclear factor kappa-B kinase subunit epsilon   |

| Abundance Ratio |              |              |              |              |              |              |              |              |               |               |               | Accession ID | Gene name | Protein Description                                                                   |
|-----------------|--------------|--------------|--------------|--------------|--------------|--------------|--------------|--------------|---------------|---------------|---------------|--------------|-----------|---------------------------------------------------------------------------------------|
| 1 d<br>M1/C1    | 1 d<br>M2/C2 | 1 d<br>M3/C3 | 4 d<br>M1/C1 | 4 d<br>M2/C2 | 4 d<br>M3/C3 | 7 d<br>M1/C1 | 7 d<br>M2/C2 | 7 d<br>M3/C3 | 10 d<br>M1/C1 | 10 d<br>M2/C2 | 10 d<br>M3/C3 |              |           |                                                                                       |
| 0.973           | 0.982        | 1.003        | 0.974        | 0.913        | 1.020        | 0.985        | 1.020        | 0.991        | 0.965         | 0.949         | 0.964         | Q70UQ0       | IKBIP     | Inhibitor of nuclear factor kappa-B kinase-interacting protein                        |
| 0.993           | 0.999        | 1.072        | 0.909        | 0.978        | 1.122        | 1.050        | 0.957        | 1.054        | 0.824         | 0.823         | 1.085         | Q9NQS7       | INCENP    | Inner centromere protein                                                              |
| 1.029           | 0.995        | 1.001        | 1.030        | 0.951        | 0.998        | 1.010        | 1.047        | 1.009        | 1.092         | 1.055         | 1.061         | Q9Y2U8       | LEMD3     | Inner nuclear membrane protein Man1                                                   |
| 1.094           | 1.037        | 1.050        | 0.993        | 0.924        | 0.908        | 0.978        | 1.201        | 0.988        |               |               |               | Q8NBZ0       | INO80E    | INO80 complex subunit E                                                               |
|                 |              |              |              |              |              |              |              |              | 1.105         | 1.009         | 1.298         | A0A0C4DGB9   | PPA2      | Inorganic pyrophosphatase 2, mitochondrial                                            |
| 1.092           | 1.006        | 1.004        | 1.010        | 1.029        | 0.967        | 0.994        | 1.019        | 1.003        | 0.997         | 0.997         | 0.957         | Q9H2U2       | PPA2      | Inorganic pyrophosphatase 2, mitochondrial                                            |
| 1.000           | 1.001        | 0.997        | 1.006        | 1.026        | 1.010        | 1.028        | 1.035        | 1.026        | 0.986         | 1.017         | 1.016         | Q15181       | PPA1      | Inorganic pyrophosphatase                                                             |
| 1.070           | 0.990        | 0.973        | 1.021        | 1.108        | 0.991        | 1.005        | 1.047        | 1.041        | 0.991         | 1.057         | 0.987         | Q9BY32       | ITPA      | Inosine triphosphate pyrophosphatase                                                  |
| 1.035           | 1.011        | 0.999        | 1.044        | 1.058        | 0.987        | 1.015        | 1.034        | 1.040        | 0.965         | 1.037         | 0.946         | P12268       | IMPDH2    | Inosine-5'-monophosphate dehydrogenase 2                                              |
| 1.053           | 0.978        | 0.984        | 0.992        | 0.926        | 1.011        | 0.991        | 1.017        | 1.098        | 1.054         | 0.996         | 1.083         | Q14643       | ITPR1     | Inositol 1,4,5-trisphosphate receptor type 1                                          |
| 1.012           | 1.003        | 1.031        | 0.993        | 0.958        | 1.065        | 1.033        | 1.040        | 1.004        | 1.061         | 1.002         | 1.121         | Q14571       | ITPR2     | Inositol 1,4,5-trisphosphate receptor type 2                                          |
| 0.962           | 0.969        | 0.982        | 0.994        | 0.940        | 1.014        | 1.021        | 0.986        | 0.994        | 1.098         | 1.004         | 1.070         | Q14573       | ITPR3     | Inositol 1,4,5-trisphosphate receptor type 3                                          |
| 1.087           | 1.024        | 1.100        | 0.984        | 0.919        | 1.081        | 0.997        | 0.936        | 0.995        | 1.042         | 0.964         | 1.046         | Q8IWB1       | ITPRIP    | Inositol 1,4,5-trisphosphate receptor-interacting protein                             |
| 1.124           | 0.940        | 1.103        | 1.044        | 0.807        | 1.110        | 0.475        | 1.043        | 0.159        | 1.174         | 1.089         | 1.255         | Q3MIP1       | ITPRIPL2  | Inositol 1,4,5-trisphosphate receptor-interacting protein-like 2                      |
| 1.208           | 0.993        | 1.221        | 1.106        | 1.099        | 1.280        | 0.950        | 1.049        | 1.051        | 1.331         | 1.026         | 1.449         | Q6PFW1       | PPIP5K1   | Inositol hexakisphosphate and diphosphoinositol-pentakisphosphate kinase 1            |
| 1.040           | 0.998        | 1.079        | 1.063        | 0.995        | 0.952        | 0.916        | 1.013        | 1.131        | 0.995         | 1.035         | 0.966         | H0Y9S9       | PPIP5K2   | Inositol hexakisphosphate and diphosphoinositol-pentakisphosphate kinase 2 (Fragment) |
| 1.003           | 1.017        | 0.987        | 1.019        | 0.996        | 0.996        | 0.983        | 1.045        | 0.982        | 0.987         | 1.002         | 1.017         | A0A087WZV0   | PPIP5K2   | Inositol hexakisphosphate and diphosphoinositol-pentakisphosphate kinase 2            |
| 1.064           | 0.968        | 0.996        | 0.913        | 0.929        | 0.995        | 1.028        | 0.997        | 1.107        | 1.029         | 1.066         | 1.032         | Q92551       | IP6K1     | Inositol hexakisphosphate kinase 1                                                    |
| 1.053           | 0.989        | 1.026        | 0.855        | 0.947        | 1.359        | 0.923        | 0.948        | 1.079        | 1.150         | 1.009         | 1.197         | O14732       | IMPA2     | Inositol monophosphatase 2                                                            |
| 0.934           | 0.963        | 1.004        | 0.956        | 0.975        | 1.048        | 0.963        | 0.922        | 0.982        | 0.985         | 1.051         | 0.955         | Q9NX62       | IMPAD1    | Inositol monophosphatase 3                                                            |
| 0.974           | 0.978        | 0.935        | 0.955        | 0.990        | 1.074        | 0.997        | 0.975        | 1.037        | 1.027         | 0.925         | 1.016         | P49441       | INPP1     | Inositol polyphosphate 1-phosphatase                                                  |
| 1.040           | 1.009        | 1.013        | 0.977        | 0.963        | 1.078        | 1.062        | 1.069        | 1.062        | 1.034         | 1.022         | 1.068         | Q9BT40       | INPP5K    | Inositol polyphosphate 5-phosphatase K                                                |
| 1.047           | 0.992        | 1.009        | 0.998        | 1.003        | 1.024        | 1.009        | 1.042        | 1.062        | 1.007         | 1.017         | 1.032         | Q01968       | OCRL      | Inositol polyphosphate 5-phosphatase OCRL-1                                           |
| 0.594           | 0.715        | 1.480        | 0.448        | 0.830        | 1.534        |              |              |              | 0.425         | 0.835         | 1.296         | Q8NFU5       | IPMK      | Inositol polyphosphate multikinase                                                    |
| 0.962           | 0.992        | 0.980        | 0.912        | 0.947        | 0.935        | 0.921        | 0.931        | 0.926        | 0.960         | 0.982         | 0.959         | Q9NPH2       | ISYNA1    | Inositol-3-phosphate synthase 1                                                       |
| 1.041           | 0.999        | 0.989        | 0.993        | 0.910        | 1.069        | 0.970        | 1.207        | 0.946        | 0.942         | 1.066         | 0.846         | Q13572       | ITPK1     | Inositol-tetrakisphosphate 1-kinase                                                   |
| 0.951           | 0.987        | 1.022        | 0.938        | 0.996        | 1.037        | 0.993        | 0.921        | 0.987        | 1.050         | 0.985         | 1.136         | P27987       | ITPKB     | Inositol-trisphosphate 3-kinase B                                                     |
| 1.042           | 1.008        | 1.038        | 0.887        | 0.972        | 1.055        | 1.037        | 0.805        | 1.148        | 0.966         | 0.875         | 0.919         | Q96DU7       | ITPKC     | Inositol-trisphosphate 3-kinase C                                                     |
| 0.928           | 0.921        | 0.974        | 0.957        | 0.899        | 1.072        | 0.902        | 1.161        | 1.078        |               |               |               | P06213       | INSR      | Insulin receptor                                                                      |

| Abundance Ratio |              |              |              |              |              |              |              |              |               |               |               | Accession ID | Gene name | Protein Description                                   |
|-----------------|--------------|--------------|--------------|--------------|--------------|--------------|--------------|--------------|---------------|---------------|---------------|--------------|-----------|-------------------------------------------------------|
| 1 d<br>M1/C1    | 1 d<br>M2/C2 | 1 d<br>M3/C3 | 4 d<br>M1/C1 | 4 d<br>M2/C2 | 4 d<br>M3/C3 | 7 d<br>M1/C1 | 7 d<br>M2/C2 | 7 d<br>M3/C3 | 10 d<br>M1/C1 | 10 d<br>M2/C2 | 10 d<br>M3/C3 |              |           |                                                       |
| 0.934           | 0.981        | 0.996        | 0.991        | 1.004        | 0.948        | 0.896        | 0.799        | 0.977        | 0.960         | 0.999         | 1.062         | P35568       | IRS1      | Insulin receptor substrate 1                          |
| 1.045           | 0.987        | 1.014        | 0.991        | 0.925        | 1.054        | 1.032        | 1.059        | 1.008        | 1.032         | 1.014         | 1.042         | Q9Y4H2       | IRS2      | Insulin receptor substrate 2                          |
| 1.006           | 1.014        | 1.005        | 1.011        | 1.005        | 0.984        | 1.012        | 1.063        | 1.019        | 1.001         | 0.998         | 1.057         | P14735       | IDE       | Insulin-degrading enzyme                              |
| 2.431           | 0.745        | 1.113        | 1.511        | 0.957        | 1.069        | 1.799        | 0.703        | 1.511        | 1.023         | 0.972         | 0.986         | P08069       | IGF1R     | Insulin-like growth factor 1 receptor                 |
| 0.998           | 1.006        | 0.993        | 0.996        | 0.981        | 1.020        | 0.975        | 1.005        | 1.007        | 0.994         | 1.021         | 1.002         | Q9NZI8       | IGF2BP1   | Insulin-like growth factor 2 mRNA-binding protein 1   |
| 1.011           | 0.994        | 1.012        | 0.991        | 0.978        | 0.995        | 0.970        | 1.008        | 0.994        | 1.001         | 1.000         | 1.012         | F8W930       | IGF2BP2   | Insulin-like growth factor 2 mRNA-binding protein 2   |
| 1.017           | 1.003        | 0.998        | 1.001        | 0.999        | 1.007        | 1.003        | 0.981        | 1.009        | 0.997         | 0.991         | 1.004         | O00425       | IGF2BP3   | Insulin-like growth factor 2 mRNA-binding protein 3   |
|                 |              |              |              |              |              |              |              |              | 0.967         | 0.991         | 1.010         | P08833       | IGFBP1    | Insulin-like growth factor-binding protein 1          |
|                 |              |              |              |              |              |              |              |              | 1.060         | 0.984         | 1.312         | Q86XT9       | TMEM219   | Insulin-like growth factor-binding protein 3 receptor |
| 0.892           | 0.966        | 1.051        | 1.027        | 1.024        | 1.193        | 0.862        | 0.744        | 1.021        | 0.996         | 1.011         | 1.150         | P22692       | IGFBP4    | Insulin-like growth factor-binding protein 4          |
| 0.986           | 0.984        | 0.958        | 0.976        | 0.922        | 0.903        | 1.072        | 0.946        | 0.978        | 1.076         | 1.010         | 1.072         | Q16270       | IGFBP7    | Insulin-like growth factor-binding protein 7          |
| 1.013           | 1.058        | 1.071        | 1.126        | 1.073        | 1.062        | 1.157        | 1.100        | 1.044        | 1.202         | 1.082         | 1.083         | Q9Y287       | ITM2B     | Integral membrane protein 2B                          |
| 1.037           | 1.110        | 1.054        | 0.998        | 0.987        | 1.079        | 1.034        | 1.362        | 1.009        | 0.991         | 1.060         | 1.031         | Q9NQX7       | ITM2C     | Integral membrane protein 2C                          |
|                 |              |              |              |              |              |              |              |              | 1.017         | 1.042         | 1.164         | F6SYP7       | DGCR2     | Integral membrane protein DGCR2/IDD                   |
| 1.122           | 1.024        | 1.018        | 1.075        | 0.937        | 0.992        | 0.987        | 1.238        | 1.011        | 0.818         | 1.629         | 0.933         | Q7Z3F1       | GPR155    | Integral membrane protein GPR155                      |
| 0.996           | 0.953        | 0.947        | 0.956        | 0.842        | 0.994        | 0.996        | 1.199        | 1.011        | 0.983         | 1.025         | 0.999         | Q86V85       | GPR180    | Integral membrane protein GPR180                      |
| 1.012           | 1.022        | 1.066        | 0.983        | 0.961        | 1.014        | 0.996        | 1.077        | 1.033        | 1.009         | 1.002         | 1.036         | Q8N201       | INTS1     | Integrator complex subunit 1                          |
| 0.976           | 1.037        | 1.004        | 1.036        | 0.989        | 1.027        | 0.992        | 1.091        | 1.028        | 1.006         | 0.987         | 1.037         | Q9NVR2       | INTS10    | Integrator complex subunit 10                         |
| 1.013           | 0.988        | 1.039        | 0.986        | 0.945        | 1.018        | 1.011        | 1.090        | 0.949        | 0.927         | 0.952         | 1.034         | Q5TA45       | INTS11    | Integrator complex subunit 11                         |
| 1.000           | 0.951        | 1.001        | 0.961        | 0.928        | 1.019        | 0.994        | 0.843        | 0.988        | 1.003         | 0.980         | 1.103         | Q96CB8       | INTS12    | Integrator complex subunit 12                         |
| 1.033           | 1.022        | 0.980        | 0.986        | 0.969        | 1.024        | 0.958        | 1.032        | 1.007        | 1.031         | 1.001         | 1.026         | B4DJL6       | INTS14    | Integrator complex subunit 14                         |
| 0.979           | 1.073        | 1.005        | 0.983        | 0.945        | 1.013        | 1.038        | 1.137        | 0.990        | 1.014         | 1.012         | 1.056         | Q9H0H0       | INTS2     | Integrator complex subunit 2                          |
| 1.040           | 1.001        | 1.049        | 0.999        | 0.961        | 1.008        | 1.002        | 1.060        | 1.038        | 1.020         | 1.034         | 1.002         | Q96HW7       | INTS4     | Integrator complex subunit 4                          |
| 0.998           | 0.997        | 1.029        | 0.991        | 0.927        | 1.077        | 1.050        | 1.092        | 1.064        | 1.050         | 1.010         | 1.070         | Q6P9B9       | INTS5     | Integrator complex subunit 5                          |
| 1.059           | 1.013        | 1.017        | 1.006        | 0.950        | 0.994        | 1.013        | 0.995        | 1.013        | 1.031         | 0.964         | 0.976         | Q9UL03       | INTS6     | Integrator complex subunit 6                          |
| 1.067           | 1.085        | 0.976        |              |              |              |              |              |              |               |               |               | Q5JSJ4       | INTS6L    | Integrator complex subunit 6-like                     |
| 1.064           | 1.032        | 1.047        | 0.988        | 0.955        | 1.021        | 1.050        | 1.040        | 1.026        | 0.970         | 0.983         | 0.998         | Q9NVH2       | INTS7     | Integrator complex subunit 7                          |
| 1.063           | 1.029        | 1.041        | 0.979        | 0.965        | 1.034        | 0.960        | 0.936        | 1.001        | 0.937         | 0.994         | 1.026         | Q75QN2       | INTS8     | Integrator complex subunit 8                          |
| 1.043           | 1.035        | 1.018        | 1.007        | 0.972        | 0.961        | 0.989        | 1.108        | 1.007        | 1.009         | 1.027         | 1.007         | Q9NV88       | INTS9     | Integrator complex subunit 9                          |
| 1.095           | 0.979        | 1.044        | 0.947        | 1.029        | 1.162        | 1.081        | 1.003        | 1.206        |               |               |               | P56199       | ITGA1     | Integrin alpha-1                                      |
|                 |              |              | 0.773        | 0.823        | 1.057        | 0.928        | 1.099        | 1.364        | 0.995         | 1.117         | 1.146         | E7ESP4       | ITGA2     | Integrin alpha-2                                      |

| Abundance Ratio |              |              |              |              |              |              |              |              |               |               |               | Accession ID | Gene name | Protein Description                                               |
|-----------------|--------------|--------------|--------------|--------------|--------------|--------------|--------------|--------------|---------------|---------------|---------------|--------------|-----------|-------------------------------------------------------------------|
| 1 d<br>M1/C1    | 1 d<br>M2/C2 | 1 d<br>M3/C3 | 4 d<br>M1/C1 | 4 d<br>M2/C2 | 4 d<br>M3/C3 | 7 d<br>M1/C1 | 7 d<br>M2/C2 | 7 d<br>M3/C3 | 10 d<br>M1/C1 | 10 d<br>M2/C2 | 10 d<br>M3/C3 |              |           |                                                                   |
| 0.996           | 0.991        | 1.001        | 1.017        | 0.938        | 1.034        | 1.033        | 1.132        | 0.999        | 0.980         | 1.016         | 1.064         | P17301       | ITGA2     | Integrin alpha-2                                                  |
| 0.946           | 1.002        | 0.990        | 1.022        | 1.010        | 1.012        | 1.088        | 1.016        | 1.040        | 1.077         | 1.031         | 1.094         | P26006       | ITGA3     | Integrin alpha-3                                                  |
| 0.990           | 1.015        | 0.995        | 1.055        | 0.973        | 1.036        | 1.052        | 1.073        | 0.991        | 0.981         | 0.991         | 1.010         | P08648       | ITGA5     | Integrin alpha-5                                                  |
| 0.967           | 0.994        | 1.012        | 1.067        | 1.011        | 1.035        | 1.052        | 1.086        | 1.014        | 0.955         | 0.966         | 1.025         | P23229       | ITGA6     | Integrin alpha-6                                                  |
|                 |              |              | 1.046        | 0.843        | 1.157        | 0.968        | 0.787        | 1.057        |               |               |               | P38570       | ITGAE     | Integrin alpha-E                                                  |
| 0.984           | 0.995        | 0.994        | 1.007        | 0.985        | 1.022        | 1.033        | 1.041        | 1.020        | 1.024         | 0.982         | 1.033         | P06756       | ITGAV     | Integrin alpha-V                                                  |
| 0.931           | 0.981        | 0.951        | 1.031        | 0.966        | 1.001        | 1.087        | 1.056        | 1.015        | 1.078         | 1.052         | 1.061         | P05556       | ITGB1     | Integrin beta-1                                                   |
| 1.012           | 0.938        | 1.217        | 0.900        | 0.814        | 1.140        | 0.883        | 1.112        | 0.993        |               |               |               | O14713       | ITGB1BP1  | Integrin beta-1-binding protein 1                                 |
| 0.998           | 0.986        | 0.981        | 0.980        | 0.917        | 0.975        | 1.033        | 0.980        | 0.974        | 1.063         | 1.001         | 1.048         | P05106       | ITGB3     | Integrin beta-3                                                   |
| 0.966           | 1.001        | 0.977        | 0.990        | 0.927        | 1.057        | 1.086        | 1.095        | 1.074        | 1.078         | 1.004         | 1.114         | P18084       | ITGB5     | Integrin beta-5                                                   |
|                 |              |              |              |              |              |              |              |              | 1.359         | 1.188         | 1.215         | P26012       | ITGB8     | Integrin beta-8                                                   |
| 1.090           | 1.062        | 0.991        | 0.946        | 0.941        | 0.979        | 1.124        | 1.148        | 1.094        | 1.020         | 1.002         | 1.175         | Q969R8       | ITFG2     | Integrin-alpha FG-GAP repeat-containing protein 2                 |
| 1.012           | 1.012        | 1.017        | 0.987        | 1.061        | 1.015        | 0.999        | 0.920        | 1.030        | 1.018         | 1.028         | 1.051         | Q9H0C8       | ILKAP     | Integrin-linked kinase-associated serine/threonine phosphatase 2C |
| 0.941           | 0.995        | 0.992        | 0.968        | 0.997        | 0.989        | 0.989        | 0.958        | 0.986        | 0.992         | 0.977         | 1.055         | A0A0A0MTH3   | ILK       | Integrin-linked protein kinase                                    |
| 0.983           | 1.008        | 1.023        | 0.971        | 0.945        | 0.939        | 1.007        | 0.971        | 0.952        | 0.991         | 0.974         | 0.979         | P05362       | ICAM1     | Intercellular adhesion molecule 1                                 |
|                 |              |              |              |              |              | 0.913        | 0.903        | 0.929        |               |               |               | P17181       | IFNAR1    | Interferon alpha/beta receptor 1                                  |
| 0.968           | 1.005        | 1.138        | 1.161        | 1.063        | 1.057        | 1.294        | 1.102        | 1.015        |               |               |               | P15260       | IFNGR1    | Interferon gamma receptor 1                                       |
|                 |              |              | 0.875        | 0.815        | 1.254        |              |              |              |               |               |               | E7EUY1       | IFNGR2    | Interferon gamma receptor 2                                       |
| 1.082           | 1.002        | 1.019        | 0.960        | 0.947        | 1.100        | 1.024        | 0.998        | 0.978        | 1.026         | 1.126         | 1.103         | P14316       | IRF2      | Interferon regulatory factor 2                                    |
| 1.027           | 0.981        | 1.027        | 1.017        | 0.975        | 1.016        | 1.003        | 1.001        | 1.015        | 1.076         | 1.028         | 1.105         | Q8IU81       | IRF2BP1   | Interferon regulatory factor 2-binding protein 1                  |
| 0.996           | 1.018        | 1.013        | 1.017        | 0.981        | 0.997        | 1.044        | 0.980        | 0.955        | 1.050         | 0.975         | 1.094         | Q7Z5L9       | IRF2BP2   | Interferon regulatory factor 2-binding protein 2                  |
| 0.988           | 0.993        | 0.993        | 0.950        | 0.985        | 0.983        | 0.975        | 0.972        | 1.008        | 1.009         | 1.014         | 1.091         | Q9H1B7       | IRF2BPL   | Interferon regulatory factor 2-binding protein-like               |
| 1.027           | 1.016        | 0.971        | 1.003        | 0.961        | 1.002        | 0.924        | 0.860        | 1.030        | 1.024         | 0.981         | 0.998         | Q14653       | IRF3      | Interferon regulatory factor 3                                    |
| 1.052           | 1.054        | 1.040        | 0.994        | 0.950        | 0.950        | 1.000        | 1.094        | 0.988        | 1.001         | 0.951         | 1.039         | Q00978       | IRF9      | Interferon regulatory factor 9                                    |
| 1.013           | 1.062        | 1.045        | 0.936        | 0.848        | 1.084        | 1.059        | 1.080        | 1.032        | 0.962         | 0.961         | 1.083         | Q9BYX4       | IFIH1     | Interferon-induced helicase C domain-containing protein 1         |
|                 |              |              | 0.895        | 0.894        | 1.019        | 0.877        | 0.842        | 1.096        |               |               |               | P09914       | IFIT1     | Interferon-induced protein with tetratricopeptide repeats 1       |
| 1.087           | 0.982        | 1.003        | 0.960        | 0.836        | 0.870        | 0.862        | 1.133        | 0.858        | 1.009         | 0.833         | 0.883         | A0A087X279   | IFIT2     | Interferon-induced protein with tetratricopeptide repeats 2       |
| 1.049           | 1.018        | 1.123        | 0.968        | 0.967        | 0.937        | 1.104        | 1.056        | 0.923        | 0.951         | 0.931         | 1.157         | O14879       | IFIT3     | Interferon-induced protein with tetratricopeptide repeats 3       |
| 0.998           | 1.031        | 1.033        | 1.045        | 1.029        | 0.958        | 1.046        | 1.021        | 0.938        | 1.071         | 1.002         | 1.106         | Q13325       | IFIT5     | Interferon-induced protein with tetratricopeptide repeats 5       |



| Abundance Ratio |              |              |              |              |              |              |              |              |               |               |               | Accession ID | Gene name | Protein Description                                                           |
|-----------------|--------------|--------------|--------------|--------------|--------------|--------------|--------------|--------------|---------------|---------------|---------------|--------------|-----------|-------------------------------------------------------------------------------|
| 1 d<br>M1/C1    | 1 d<br>M2/C2 | 1 d<br>M3/C3 | 4 d<br>M1/C1 | 4 d<br>M2/C2 | 4 d<br>M3/C3 | 7 d<br>M1/C1 | 7 d<br>M2/C2 | 7 d<br>M3/C3 | 10 d<br>M1/C1 | 10 d<br>M2/C2 | 10 d<br>M3/C3 |              |           |                                                                               |
| 0.998           | 1.004        | 0.933        | 1.067        | 0.936        | 1.040        | 1.104        | 1.112        | 1.043        | 1.225         | 1.079         | 1.033         | Q01628       | IFITM3    | Interferon-induced transmembrane protein 3                                    |
| 0.992           | 1.002        | 0.996        | 0.981        | 0.960        | 1.012        | 1.004        | 1.054        | 1.020        | 0.950         | 0.975         | 0.988         | P19525       | EIF2AK2   | Interferon-induced, double-stranded RNA-activated protein kinase              |
| 0.969           | 1.001        | 0.986        | 1.038        | 1.023        | 1.023        | 1.010        | 1.045        | 0.993        | 1.012         | 1.018         | 1.012         | O75569       | PRKRA     | Interferon-inducible double-stranded RNA-dependent protein kinase activator A |
| 0.860           | 0.896        | 0.990        | 0.971        | 0.964        | 1.055        | 0.906        | 1.110        | 1.065        | 0.981         | 0.958         | 1.072         | Q12894       | IFRD2     | Interferon-related developmental regulator 2                                  |
| 1.004           | 1.027        | 0.992        | 0.903        | 1.005        | 1.032        | 1.008        | 1.115        | 1.036        | 0.998         | 0.989         | 1.000         | Q9H9L3       | ISG20L2   | Interferon-stimulated 20 kDa exonuclease-like 2                               |
| 1.093           | 1.090        | 1.086        | 0.955        | 0.949        | 1.034        | 1.010        | 1.194        | 1.047        | 0.832         | 0.935         | 1.039         | Q96AZ6       | ISG20     | Interferon-stimulated gene 20 kDa protein                                     |
| 1.043           | 0.994        | 1.009        | 0.980        | 0.938        | 0.994        | 0.970        | 1.029        | 0.980        | 0.925         | 0.987         | 0.913         | Q12905       | ILF2      | Interleukin enhancer-binding factor 2                                         |
| 1.316           | 1.070        | 1.215        | 0.996        | 0.874        | 1.002        | 1.011        | 1.178        | 1.036        | 1.172         | 0.998         | 1.124         | Q9NPH3       | IL1RAP    | Interleukin-1 receptor accessory protein                                      |
| 1.008           | 1.078        | 0.815        | 1.033        | 1.079        | 1.092        | 0.917        | 1.160        | 1.042        | 0.967         | 1.030         | 0.907         | P51617       | IRAK1     | Interleukin-1 receptor-associated kinase 1                                    |
| 1.074           | 1.042        | 0.977        |              |              |              |              |              |              |               |               |               | Q9Y616       | IRAK3     | Interleukin-1 receptor-associated kinase 3                                    |
| 1.015           | 0.971        | 0.965        | 1.010        | 0.994        | 1.042        | 0.962        | 1.015        | 0.990        | 1.026         | 1.061         | 1.025         | Q9NWX3       | IRAK4     | Interleukin-1 receptor-associated kinase 4                                    |
| 0.999           | 1.112        | 1.108        | 1.003        | 0.975        | 1.033        | 1.065        | 1.076        | 1.047        | 1.123         | 0.984         | 1.132         | O43187       | IRAK2     | Interleukin-1 receptor-associated kinase-like 2                               |
|                 |              |              |              |              |              | 0.982        | 0.997        | 0.792        |               |               |               | P78552       | IL13RA1   | Interleukin-13 receptor subunit alpha-1                                       |
|                 |              |              | 0.797        | 0.901        | 1.258        |              |              |              |               |               |               | Q8NAC3       | IL17RC    | Interleukin-17 receptor C                                                     |
| 0.975           | 1.016        | 1.018        | 1.006        | 1.001        | 1.068        | 0.995        | 0.946        | 1.009        | 1.093         | 1.048         | 1.047         | Q14116       | IL18      | Interleukin-18                                                                |
| 1.429           | 0.881        | 0.848        |              |              |              |              |              |              |               |               |               | Q13478       | IL18R1    | Interleukin-18 receptor 1                                                     |
| 0.986           | 0.990        | 1.057        | 0.899        | 0.982        | 0.978        | 1.009        | 1.144        | 0.990        | 0.900         | 0.885         | 1.050         | Q14213       | EBI3      | Interleukin-27 subunit beta                                                   |
| 1.067           | 1.014        | 1.062        | 1.028        | 0.978        | 1.056        | 1.038        | 1.132        | 1.011        | 1.003         | 0.974         | 1.061         | P40189       | IL6ST     | Interleukin-6 receptor subunit beta                                           |
| 1.045           | 1.019        | 1.152        | 1.162        | 0.926        | 1.128        | 1.111        | 1.116        | 1.195        | 1.034         | 0.998         | 1.123         | O15554       | KCNN4     | Intermediate conductance calcium-activated potassium channel protein 4        |
| 1.025           | 1.008        | 0.967        | 1.012        | 0.948        | 0.991        | 0.997        | 1.036        | 0.989        | 1.031         | 1.005         | 1.043         | Q15811       | ITSN1     | Intersectin-1                                                                 |
| 1.028           | 1.008        | 1.053        | 1.023        | 0.968        | 1.024        | 1.001        | 1.014        | 1.025        | 0.996         | 0.979         | 1.006         | Q9NZM3       | ITSN2     | Intersectin-2                                                                 |
| 1.055           | 1.036        | 1.014        | 1.008        | 0.831        | 0.970        | 0.939        | 1.018        | 1.019        | 0.996         | 1.004         | 1.124         | B4DUA7       | IXL       | Intersex-like (Drosophila)                                                    |
| 0.999           | 0.970        | 1.049        | 1.000        | 0.997        | 1.006        | 1.028        | 0.942        | 0.960        | 1.099         | 1.089         | 1.081         | Q5JVS0       | HABP4     | Intracellular hyaluronan-binding protein 4                                    |
| 0.986           | 1.008        | 1.025        | 1.033        | 0.950        | 1.025        | 1.036        | 1.029        | 0.990        | 0.999         | 0.982         | 1.064         | Q96RY7       | IFT140    | Intraflagellar transport protein 140 homolog                                  |
| 1.048           | 1.052        | 1.017        | 1.074        | 0.970        | 0.988        | 1.005        | 1.078        | 1.080        | 0.799         | 0.968         | 0.883         | Q9UG01       | IFT172    | Intraflagellar transport protein 172 homolog                                  |
| 0.967           | 0.928        | 1.175        |              |              |              |              |              |              | 0.955         | 0.979         | 1.020         | Q9H7X7       | IFT22     | Intraflagellar transport protein 22 homolog                                   |
| 1.059           | 0.986        | 0.999        | 0.967        | 0.920        | 0.930        | 0.914        | 1.055        | 0.996        | 0.863         | 0.890         | 1.007         | Q9Y547       | HSPB11    | Intraflagellar transport protein 25 homolog                                   |
| 1.021           | 0.990        | 0.990        | 0.997        | 0.993        | 0.962        | 0.968        | 1.030        | 1.010        | 1.018         | 0.922         | 1.030         | Q9BW83       | IFT27     | Intraflagellar transport protein 27 homolog                                   |
| 1.091           | 1.034        | 0.990        | 0.959        | 0.904        | 0.942        | 0.982        | 1.174        | 1.003        | 0.895         | 1.025         | 1.058         | Q9Y366       | IFT52     | Intraflagellar transport protein 52 homolog                                   |
| 0.985           | 1.014        | 1.010        | 1.015        | 0.999        | 1.098        | 1.059        | 1.055        | 1.051        | 0.997         | 1.017         | 1.079         | A0AVF1       | TTC26     | Intraflagellar transport protein 56                                           |
| 1.182           | 1.049        | 1.106        | 1.038        | 0.836        | 0.964        |              |              |              |               |               |               | Q9NWB7       | IFT57     | Intraflagellar transport protein 57 homolog                                   |
| 1.058           | 1.008        | 1.052        | 1.089        | 0.932        | 0.984        | 1.050        | 1.159        | 1.001        | 1.066         | 1.076         | 1.087         | Q96LB3       | IFT74     | Intraflagellar transport protein 74 homolog                                   |

| Abundance Ratio |              |              |              |              |              |              |              |              |               |               |               | Accession ID | Gene name | Protein Description                                                                 |
|-----------------|--------------|--------------|--------------|--------------|--------------|--------------|--------------|--------------|---------------|---------------|---------------|--------------|-----------|-------------------------------------------------------------------------------------|
| 1 d<br>M1/C1    | 1 d<br>M2/C2 | 1 d<br>M3/C3 | 4 d<br>M1/C1 | 4 d<br>M2/C2 | 4 d<br>M3/C3 | 7 d<br>M1/C1 | 7 d<br>M2/C2 | 7 d<br>M3/C3 | 10 d<br>M1/C1 | 10 d<br>M2/C2 | 10 d<br>M3/C3 |              |           |                                                                                     |
| 0.908           | 0.932        | 0.945        | 0.980        | 0.902        | 1.080        | 1.077        | 0.853        | 0.989        | 1.036         | 0.876         | 1.168         | Q8WYA0       | IFT81     | Intraflagellar transport protein 81 homolog                                         |
| 1.100           | 1.087        | 1.014        | 1.081        | 1.016        | 0.887        | 1.145        | 1.052        | 0.933        | 1.052         | 0.957         | 0.994         | Q13099       | IFT88     | Intraflagellar transport protein 88 homolog                                         |
| 1.013           | 1.026        | 1.009        | 0.990        | 0.968        | 1.014        | 0.980        | 1.067        | 1.012        | 0.957         | 0.986         | 1.006         | O60306       | AQR       | Intron-binding protein aquarius                                                     |
| 1.116           | 0.826        | 0.929        | 1.105        | 0.968        | 1.054        | 0.956        | 1.123        | 0.932        | 1.057         | 1.142         | 0.976         | Q8N2Y8       | RUSC2     | Iporin                                                                              |
|                 |              |              |              |              |              | 0.947        | 1.044        | 1.041        |               |               |               | Q15051       | IQCB1     | IQ calmodulin-binding motif-containing protein 1                                    |
| 1.075           | 1.031        | 1.060        | 1.054        | 0.831        | 0.990        | 0.996        | 0.986        | 0.948        | 0.948         | 0.880         | 1.066         | Q96DY2       | IQCD      | IQ domain-containing protein D                                                      |
| 1.015           | 1.028        | 1.017        | 0.998        | 0.927        | 1.028        | 1.031        | 1.022        | 0.912        | 0.959         | 0.998         | 1.070         | A0A087WWK8   | IQSEC1    | IQ motif and SEC7 domain-containing protein 1                                       |
| 0.706           | 0.818        | 0.833        | 0.974        | 0.646        | 0.890        | 1.053        | 1.099        | 1.340        | 0.888         | 1.084         | 0.898         | A0A0A6YY96   | IREB2     | Iron-responsive element-binding protein 2                                           |
| 0.979           | 0.964        | 1.034        | 1.045        | 1.020        | 1.093        | 1.062        | 1.144        | 1.111        | 1.051         | 1.030         | 1.122         | Q86U28       | ISCA2     | Iron-sulfur cluster assembly 2 homolog, mitochondrial                               |
| 0.966           | 0.943        | 1.018        | 0.995        | 0.956        | 1.031        | 1.050        | 0.972        | 1.029        | 1.073         | 1.044         | 1.033         | Q9H1K1       | ISCU      | Iron-sulfur cluster assembly enzyme ISCU, mitochondrial                             |
| 1.057           | 1.001        | 1.058        | 1.017        | 0.893        | 1.058        | 1.017        | 1.043        | 1.020        | 1.026         | 0.994         | 1.048         | Q8IWL3       | HSCB      | Iron-sulfur cluster co-chaperone protein HscB, mitochondrial                        |
| 1.008           | 0.989        | 1.026        | 0.995        | 1.007        | 1.002        | 0.965        | 1.068        | 0.998        | 0.976         | 0.966         | 1.004         | Q8TB37       | NUBPL     | Iron-sulfur protein NUBPL                                                           |
| 1.047           | 1.021        | 0.996        | 1.051        | 1.006        | 1.002        | 1.037        | 1.084        | 0.949        | 1.021         | 1.010         | 0.987         | Q2TAA2       | IAH1      | Isoamyl acetate-hydrolyzing esterase 1 homolog                                      |
| 0.993           | 1.002        | 0.997        | 1.051        | 1.080        | 0.928        | 1.013        | 1.063        | 1.008        | 1.002         | 0.947         | 0.994         | Q7L266       | ASRGL1    | Isoaspartyl peptidase/L-asparaginase                                                |
| 0.949           | 0.994        | 0.953        | 0.989        | 0.993        | 1.007        | 1.036        | 0.994        | 0.968        | 1.041         | 0.945         | 1.037         | Q9UKU7       | ACAD8     | Isobutyryl-CoA dehydrogenase, mitochondrial                                         |
| 0.992           | 1.024        | 0.996        | 1.011        | 0.992        | 1.008        | 1.004        | 1.064        | 1.026        | 0.951         | 1.000         | 0.963         | Q96CN7       | ISOC1     | Isochorismatase domain-containing protein 1                                         |
| 1.030           | 1.049        | 1.008        | 1.003        | 1.049        | 1.005        | 0.985        | 1.124        | 1.059        | 0.929         | 1.038         | 0.955         | Q96AB3       | ISOC2     | Isochorismatase domain-containing protein 2                                         |
| 0.970           | 0.987        | 0.981        | 0.991        | 0.989        | 1.032        | 0.990        | 0.980        | 0.993        | 1.022         | 1.002         | 0.993         | P50213       | IDH3A     | Isocitrate dehydrogenase [NAD] subunit alpha, mitochondrial                         |
| 1.025           | 1.003        | 1.074        | 0.965        | 1.061        | 1.049        | 0.928        | 0.970        | 0.996        | 0.929         | 1.043         | 1.003         | P51553       | IDH3G     | Isocitrate dehydrogenase [NAD] subunit gamma, mitochondrial                         |
| 0.971           | 0.985        | 0.984        | 1.017        | 1.041        | 0.994        | 0.992        | 1.015        | 0.993        | 1.003         | 0.971         | 0.991         | A0A087WZN1   | IDH3B     | Isocitrate dehydrogenase [NAD] subunit, mitochondrial                               |
| 0.975           | 0.976        | 1.011        | 0.979        | 1.045        | 0.998        | 0.966        | 0.907        | 0.984        | 1.028         | 1.008         | 1.026         | O75874       | IDH1      | Isocitrate dehydrogenase [NADP] cytoplasmic                                         |
| 1.034           | 0.979        | 1.008        | 1.003        | 1.167        | 1.020        | 1.023        | 0.979        | 1.035        | 0.947         | 0.977         | 0.977         | P48735       | IDH2      | Isocitrate dehydrogenase [NADP], mitochondrial                                      |
| 0.968           | 1.063        | 1.044        | 0.951        | 1.022        | 1.103        | 1.061        | 1.118        | 1.110        | 1.073         | 0.939         | 1.082         | P55196-2     | AFDN      | Isoform 1 of Afadin                                                                 |
| 1.033           | 1.001        | 0.992        | 0.983        | 0.958        | 1.046        | 0.982        | 1.078        | 1.082        | 1.000         | 1.040         | 1.032         | Q9ULH1-2     | ASAP1     | Isoform 1 of Arf-GAP with SH3 domain, ANK repeat and PH domain-containing protein 1 |
| 0.847           | 0.777        | 0.986        | 0.908        | 0.878        | 1.194        | 0.846        | 0.832        | 1.041        | 1.303         | 0.995         | 1.278         | Q9UI08-2     | EVL       | Isoform 1 of Ena/VASP-like protein                                                  |
| 1.028           | 1.007        | 1.076        | 0.809        | 1.024        | 0.914        | 1.140        | 1.003        | 1.021        | 1.109         | 0.774         | 1.205         | Q9BXW9-1     | FANCD2    | Isoform 1 of Fanconi anemia group D2 protein                                        |
|                 |              |              | 0.966        | 1.167        | 1.067        | 0.946        | 0.898        | 0.929        | 1.140         | 0.954         | 1.290         | O43189-2     | PHF1      | Isoform 1 of PHD finger protein 1                                                   |
| 0.978           | 1.023        | 1.018        | 0.987        | 0.979        | 1.026        | 0.995        | 0.988        | 1.017        | 1.042         | 1.011         | 1.017         | Q99959-2     | PKP2      | Isoform 1 of Plakophilin-2                                                          |
| 0.909           | 0.922        | 1.098        | 0.902        | 0.903        | 1.023        | 0.899        | 1.034        | 1.304        | 0.985         | 0.926         | 1.090         | Q9P2E9-2     | RRBP1     | Isoform 1 of Ribosome-binding protein 1                                             |

| Abundance Ratio |              |              |              |              |              |              |              |              |               |               |               | Accession ID | Gene name | Protein Description                                                                         |
|-----------------|--------------|--------------|--------------|--------------|--------------|--------------|--------------|--------------|---------------|---------------|---------------|--------------|-----------|---------------------------------------------------------------------------------------------|
| 1 d<br>M1/C1    | 1 d<br>M2/C2 | 1 d<br>M3/C3 | 4 d<br>M1/C1 | 4 d<br>M2/C2 | 4 d<br>M3/C3 | 7 d<br>M1/C1 | 7 d<br>M2/C2 | 7 d<br>M3/C3 | 10 d<br>M1/C1 | 10 d<br>M2/C2 | 10 d<br>M3/C3 |              |           |                                                                                             |
| 1.051           | 0.973        | 1.095        | 0.969        | 0.940        | 1.018        | 0.960        | 0.961        | 0.981        | 0.987         | 0.976         | 1.024         | Q6P6C2-1     | ALKBH5    | Isoform 1 of RNA demethylase ALKBH5                                                         |
| 0.931           | 0.994        | 0.990        | 0.920        | 0.925        | 0.988        | 0.948        | 1.007        | 0.900        | 0.932         | 0.962         | 0.956         | Q96A57-2     | TMEM230   | Isoform 1 of Transmembrane protein 230                                                      |
| 1.016           | 0.991        | 0.986        | 0.999        | 0.987        | 0.939        | 0.988        | 0.962        | 0.994        | 1.022         | 1.033         | 0.992         | P45880-1     | VDAC2     | Isoform 1 of Voltage-dependent anion-selective channel protein 2                            |
| 0.988           | 1.001        | 1.016        | 0.956        | 0.968        | 0.997        | 1.037        | 1.009        | 0.964        | 0.955         | 0.934         | 0.984         | P09493-10    | TPM1      | Isoform 10 of Tropomyosin alpha-1 chain                                                     |
| 1.057           | 1.108        | 1.191        |              |              |              | 0.822        | 1.150        | 1.003        | 1.006         | 0.713         | 0.801         | Q9BX66-12    | SORBS1    | Isoform 12 of Sorbin and SH3 domain-containing protein 1                                    |
| 1.005           | 1.041        | 1.091        | 1.017        | 0.940        | 0.997        | 1.050        | 1.113        | 1.065        | 1.022         | 1.010         | 1.095         | O75923-13    | DYSF      | Isoform 13 of Dysferlin                                                                     |
| 1.085           | 1.071        | 1.024        | 0.946        | 0.976        | 0.789        | 1.058        | 0.993        | 1.098        | 0.786         | 0.917         | 0.778         | Q9ULU4-13    | ZMYND8    | Isoform 13 of Protein kinase C-binding protein 1                                            |
| 0.817           | 0.983        | 1.067        | 0.941        | 0.993        | 1.088        | 0.967        | 0.953        | 0.997        |               |               |               | Q96AX9-14    | MIB2      | Isoform 14 of E3 ubiquitin-protein ligase MIB2                                              |
| 1.037           | 1.013        | 1.022        | 0.992        | 0.967        | 0.963        | 1.025        | 1.107        | 0.982        | 0.953         | 1.003         | 0.961         | Q9ULU4-19    | ZMYND8    | Isoform 19 of Protein kinase C-binding protein 1                                            |
| 1.072           | 1.037        | 1.092        | 1.025        | 0.953        | 1.016        | 1.008        | 1.043        | 1.092        | 1.046         | 1.005         | 0.971         | O43318-2     | MAP3K7    | Isoform 1A of Mitogen-activated protein kinase kinase kinase 7                              |
| 0.985           | 1.016        | 1.004        | 0.999        | 1.002        | 1.011        | 1.016        | 0.960        | 1.009        | 1.021         | 0.974         | 1.033         | O60716-3     | CTNND1    | Isoform 1AC of Catenin delta-1                                                              |
| 1.054           | 1.080        | 1.010        | 0.997        | 0.968        | 1.006        | 0.937        | 0.928        | 0.982        | 1.004         | 0.960         | 0.965         | Q15120-2     | PDK3      | Isoform 2 of [Pyruvate dehydrogenase (acetyl-transferring)] kinase isozyme 3, mitochondrial |
| 1.029           | 1.014        | 1.017        | 1.004        | 0.995        | 0.997        | 0.970        | 1.025        | 1.012        | 0.989         | 0.949         | 0.978         | Q9P0J1-2     | PDP1      | Isoform 2 of [Pyruvate dehydrogenase [acetyl-transferring]]-phosphatase 1, mitochondrial    |
| 0.970           | 0.902        | 0.980        | 0.980        | 0.951        | 0.965        | 0.949        | 1.006        | 0.944        | 0.999         | 0.977         | 0.993         | P51178-2     | PLCD1     | Isoform 2 of 1-phosphatidylinositol 4,5-bisphosphate phosphodiesterase delta-1              |
| 0.967           | 0.983        | 1.006        | 1.017        | 0.967        | 1.018        | 0.984        | 1.010        | 1.038        | 0.996         | 0.985         | 1.026         | P19174-2     | PLCG1     | Isoform 2 of 1-phosphatidylinositol 4,5-bisphosphate phosphodiesterase gamma-1              |
| 1.009           | 0.991        | 0.991        | 0.986        | 0.971        | 0.987        | 0.986        | 0.972        | 0.974        | 1.031         | 0.973         | 0.999         | Q92552-2     | MRPS27    | Isoform 2 of 28S ribosomal protein S27, mitochondrial                                       |
| 0.993           | 0.998        | 0.993        | 1.015        | 0.936        | 0.996        | 0.983        | 0.985        | 1.000        | 1.025         | 1.025         | 1.016         | O75600-2     | GCAT      | Isoform 2 of 2-amino-3-ketobutyrate coenzyme A ligase, mitochondrial                        |
| 1.050           | 0.966        | 1.053        | 1.018        | 0.949        | 1.045        | 1.039        | 0.976        | 0.992        | 1.217         | 1.054         | 1.002         | Q6PK18-2     | OGFOD3    | Isoform 2 of 2-oxoglutarate and iron-dependent oxygenase domain-containing protein 3        |
| 0.996           | 1.020        | 0.934        | 0.989        | 0.952        | 0.985        | 0.964        | 1.005        | 0.985        | 0.968         | 0.990         | 0.915         | Q7Z7H8-2     | MRPL10    | Isoform 2 of 39S ribosomal protein L10, mitochondrial                                       |
| 0.998           | 1.009        | 0.989        | 0.941        | 0.977        | 1.001        | 0.962        | 0.935        | 0.940        | 1.038         | 1.020         | 1.045         | Q8TCC3-2     | MRPL30    | Isoform 2 of 39S ribosomal protein L30, mitochondrial                                       |
| 1.061           | 1.017        | 1.078        | 1.090        | 1.104        | 1.131        | 1.045        | 0.913        | 1.060        | 1.089         | 1.030         | 1.040         | Q7Z7F7-2     | MRPL55    | Isoform 2 of 39S ribosomal protein L55, mitochondrial                                       |
| 0.989           | 0.976        | 0.990        | 0.982        | 0.972        | 1.004        | 0.983        | 1.008        | 1.011        | 1.029         | 0.944         | 1.025         | P25325-2     | MPST      | Isoform 2 of 3-mercaptopyruvate sulfurtransferase                                           |
| 1.409           | 1.015        | 1.086        | 1.164        | 1.862        | 0.951        | 1.029        | 0.771        | 1.006        | 0.870         | 0.988         | 0.805         | P62273-2     | RPS29     | Isoform 2 of 40S ribosomal protein S29                                                      |
| 0.968           | 1.009        | 0.976        | 1.019        | 1.007        | 1.015        | 1.024        | 1.016        | 0.994        | 1.034         | 0.996         | 1.020         | Q13131-2     | PRKAA1    | Isoform 2 of 5'-AMP-activated protein kinase catalytic subunit alpha-1                      |

| Abundance Ratio |              |              |              |              |              |              |              |              |               |               |               | Accession ID | Gene name | Protein Description                                                                |
|-----------------|--------------|--------------|--------------|--------------|--------------|--------------|--------------|--------------|---------------|---------------|---------------|--------------|-----------|------------------------------------------------------------------------------------|
| 1 d<br>M1/C1    | 1 d<br>M2/C2 | 1 d<br>M3/C3 | 4 d<br>M1/C1 | 4 d<br>M2/C2 | 4 d<br>M3/C3 | 7 d<br>M1/C1 | 7 d<br>M2/C2 | 7 d<br>M3/C3 | 10 d<br>M1/C1 | 10 d<br>M2/C2 | 10 d<br>M3/C3 |              |           |                                                                                    |
| 1.049           | 1.027        | 1.024        | 0.975        | 0.950        | 1.005        | 0.986        | 1.118        | 0.961        | 1.046         | 1.042         | 0.913         | Q9H857-2     | NT5DC2    | Isoform 2 of 5'-nucleotidase domain-containing protein 2                           |
| 0.977           | 1.010        | 0.990        | 0.993        | 0.977        | 1.000        | 1.046        | 1.083        | 1.034        | 1.109         | 1.076         | 1.060         | Q9NR19-2     | ACSS2     | Isoform 2 of Acetyl-coenzyme A synthetase, cytoplasmic                             |
| 0.994           | 0.964        | 0.986        | 0.981        | 0.949        | 1.005        | 1.027        | 0.997        | 0.968        | 1.027         | 0.969         | 0.951         | Q13510-2     | ASAH1     | Isoform 2 of Acid ceramidase                                                       |
| 1.027           | 1.015        | 1.018        | 0.978        | 1.010        | 1.001        | 0.958        | 0.956        | 0.930        | 0.928         | 0.951         | 0.957         | Q8N556-2     | AFAP1     | Isoform 2 of Actin filament-associated protein 1                                   |
| 1.001           | 0.997        | 1.005        | 0.960        | 0.963        | 0.947        | 0.977        | 1.077        | 1.011        | 0.938         | 0.967         | 0.960         | Q8N9N2-2     | ASCC1     | Isoform 2 of Activating signal cointegrator 1 complex subunit 1                    |
| 1.036           | 0.998        | 0.997        | 0.977        | 0.962        | 0.945        | 0.964        | 1.006        | 0.933        | 1.024         | 0.970         | 0.983         | Q96CM8-2     | ACSF2     | Isoform 2 of Acyl-CoA synthetase family member 2, mitochondrial                    |
| 0.996           | 0.970        | 0.996        | 1.023        | 1.001        | 1.057        | 1.027        | 1.063        | 1.078        | 1.039         | 1.005         | 1.044         | Q96HN2-2     | AHCYL2    | Isoform 2 of Adenosylhomocysteinase 3                                              |
| 1.021           | 1.011        | 1.016        | 1.002        | 1.094        | 0.988        | 0.985        | 0.962        | 1.021        | 0.993         | 0.995         | 0.978         | Q01518-2     | CAP1      | Isoform 2 of Adenylyl cyclase-associated protein 1                                 |
| 1.078           | 0.986        | 0.919        | 0.928        | 0.887        | 1.034        | 1.038        | 1.069        | 1.012        | 1.103         | 0.981         | 1.083         | P56559-2     | ARL4C     | Isoform 2 of ADP-ribosylation factor-like protein 4C                               |
| 1.033           | 0.960        | 1.031        | 0.971        | 0.920        | 1.049        | 0.993        | 0.910        | 1.010        | 1.133         | 1.009         | 1.102         | Q66PJ3-2     | ARL6IP4   | Isoform 2 of ADP-ribosylation factor-like protein 6-interacting protein 4          |
| 1.017           | 0.888        | 1.001        |              |              |              |              |              |              |               |               |               | P51825-2     | AFF1      | Isoform 2 of AF4/FMR2 family member 1                                              |
| 0.995           | 0.920        | 0.994        | 0.965        | 0.872        | 1.045        | 1.055        | 0.926        | 1.031        | 0.979         | 0.936         | 1.092         | Q12802-2     | AKAP13    | Isoform 2 of A-kinase anchor protein 13                                            |
| 1.045           | 1.003        | 0.991        | 0.995        | 0.904        | 1.007        | 1.022        | 1.230        | 1.004        | 0.841         | 0.830         | 0.986         | Q9H8T0-2     | AKTIP     | Isoform 2 of AKT-interacting protein                                               |
| 0.793           | 1.007        | 0.915        | 0.987        | 1.078        | 1.037        | 0.974        | 0.912        | 0.940        | 1.177         | 0.738         | 0.981         | C9JRZ8-2     | AKR1B15   | Isoform 2 of Aldo-keto reductase family 1 member B15                               |
|                 |              |              |              |              |              |              |              |              | 1.111         | 0.802         | 1.011         | Q9BQI0-2     | AIF1L     | Isoform 2 of Allograft inflammatory factor 1-like                                  |
| 1.098           | 1.052        | 1.006        | 1.166        | 0.835        | 0.999        | 1.040        | 1.111        | 1.117        | 1.064         | 0.904         | 1.070         | P35609-2     | ACTN2     | Isoform 2 of Alpha-actinin-2                                                       |
| 1.014           | 0.997        | 0.976        | 0.997        | 1.015        | 0.966        | 0.995        | 0.993        | 0.985        | 0.985         | 0.980         | 0.962         | P49419-2     | ALDH7A1   | Isoform 2 of Alpha-aminoadipic semialdehyde dehydrogenase                          |
| 1.058           | 0.957        | 0.878        |              |              |              |              |              |              |               |               |               | Q3KRA9-2     | ALKBH6    | Isoform 2 of Alpha-ketoglutarate-dependent dioxygenase alkB homolog 6              |
| 1.008           | 0.998        | 0.994        | 0.982        | 1.033        | 0.985        | 0.985        | 0.982        | 0.990        | 1.001         | 1.013         | 1.017         | Q12904-2     | AIMP1     | Isoform 2 of Aminoacyl tRNA synthase complex-interacting multifunctional protein 1 |
| 1.050           | 0.868        | 1.033        | 0.952        | 0.916        | 1.001        | 1.058        | 0.987        | 1.038        | 1.012         | 0.993         | 1.101         | Q96FJ0-2     | STAMBPL1  | Isoform 2 of AMSH-like protease                                                    |
| 1.027           | 1.006        | 0.991        | 1.008        | 0.975        | 0.954        | 0.985        | 1.012        | 0.969        | 0.980         | 1.003         | 0.941         | P07355-2     | ANXA2     | Isoform 2 of Annexin A2                                                            |
|                 |              |              |              |              |              |              | 0.992        | 1.216        | 0.953         |               |               | P09525-2     | ANXA4     | Isoform 2 of Annexin A4                                                            |
| 0.983           | 0.993        | 0.994        | 0.971        | 0.918        | 0.981        | 0.990        | 1.020        | 0.995        | 1.031         | 1.016         | 1.005         | Q4KMQ2-2     | ANO6      | Isoform 2 of Anoctamin-6                                                           |
| 1.050           | 1.008        | 1.022        | 1.031        | 1.125        | 1.004        | 1.016        | 0.981        | 1.033        | 0.994         | 0.982         | 0.995         | O43747-2     | AP1G1     | Isoform 2 of AP-1 complex subunit gamma-1                                          |
| 1.034           | 0.956        | 0.971        | 0.933        | 0.803        | 1.085        | 1.000        | 1.113        | 0.991        | 0.909         | 1.041         | 0.930         | Q96PC3-2     | AP1S3     | Isoform 2 of AP-1 complex subunit sigma-3                                          |
| 0.979           | 1.007        | 0.986        | 0.991        | 0.988        | 0.978        | 0.972        | 1.012        | 1.008        | 0.986         | 0.982         | 0.982         | P63010-2     | AP2B1     | Isoform 2 of AP-2 complex subunit beta                                             |
| 1.035           | 0.958        | 0.950        | 0.919        | 0.931        | 0.891        |              |              |              | 1.050         | 0.798         | 0.924         | O14791-2     | APOL1     | Isoform 2 of Apolipoprotein L1                                                     |

| Abundance Ratio |              |              |              |              |              |              |              |              |               |               |               | Accession ID | Gene name | Protein Description                                                                      |
|-----------------|--------------|--------------|--------------|--------------|--------------|--------------|--------------|--------------|---------------|---------------|---------------|--------------|-----------|------------------------------------------------------------------------------------------|
| 1 d<br>M1/C1    | 1 d<br>M2/C2 | 1 d<br>M3/C3 | 4 d<br>M1/C1 | 4 d<br>M2/C2 | 4 d<br>M3/C3 | 7 d<br>M1/C1 | 7 d<br>M2/C2 | 7 d<br>M3/C3 | 10 d<br>M1/C1 | 10 d<br>M2/C2 | 10 d<br>M3/C3 |              |           |                                                                                          |
| 1.060           | 1.028        | 0.935        | 1.039        | 1.014        | 0.910        | 1.042        | 1.111        | 0.938        | 1.088         | 1.074         | 0.933         | Q9BZZ5-2     | API5      | Isoform 2 of Apoptosis inhibitor 5                                                       |
|                 |              |              | 0.821        | 0.813        | 1.387        | 1.040        | 1.045        | 0.938        |               |               |               | Q8N2F6-2     | ARMC10    | Isoform 2 of Armadillo repeat-containing protein 10                                      |
| 0.983           | 0.988        | 1.009        | 1.011        | 0.981        | 1.013        | 1.007        | 1.065        | 1.023        | 1.000         | 1.008         | 1.018         | Q15121-2     | PEA15     | Isoform 2 of Astrocytic phosphoprotein PEA-15                                            |
| 0.975           | 0.883        | 0.951        | 1.073        | 1.116        | 0.921        |              |              |              | 0.918         | 0.979         | 0.882         | Q14CW9-2     | ATXN7L3   | Isoform 2 of Ataxin-7-like protein 3                                                     |
| 0.896           | 0.985        | 1.082        | 0.797        | 0.817        | 0.934        | 0.744        | 0.603        | 0.910        | 1.093         | 1.099         | 1.056         | Q06055-2     | ATP5G2    | Isoform 2 of ATP synthase F(0) complex subunit C2, mitochondrial                         |
| 0.978           | 1.015        | 1.004        | 1.041        | 0.951        | 0.919        | 0.979        | 0.985        | 0.961        | 0.977         | 1.003         | 0.930         | P18859-2     | ATP5J     | Isoform 2 of ATP synthase-coupling factor 6, mitochondrial                               |
| 0.971           | 0.994        | 1.010        | 0.979        | 0.976        | 1.004        | 0.982        | 0.942        | 0.942        | 1.012         | 1.019         | 1.033         | Q9NVI7-2     | ATAD3A    | Isoform 2 of ATPase family AAA domain-containing protein 3A                              |
| 1.010           | 0.992        | 1.040        | 1.009        | 0.876        | 1.020        | 1.006        | 1.023        | 1.014        | 1.087         | 0.928         | 0.996         | O75027-2     | ABCB7     | Isoform 2 of ATP-binding cassette sub-family B member 7, mitochondrial                   |
| 0.974           | 1.013        | 0.988        | 1.019        | 1.039        | 1.014        | 1.012        | 0.999        | 1.005        | 1.015         | 1.057         | 1.013         | Q9UG63-2     | ABCF2     | Isoform 2 of ATP-binding cassette sub-family F member 2                                  |
|                 |              |              | 1.073        | 0.878        | 1.041        |              |              |              | 0.922         | 1.005         | 0.880         | P53396-2     | ACLY      | Isoform 2 of ATP-citrate synthase                                                        |
| 0.984           | 0.904        | 0.926        | 1.066        | 1.138        | 1.060        | 1.110        | 0.948        | 1.074        | 0.661         | 1.028         | 1.201         | Q2TAZ0-3     | ATG2A     | Isoform 2 of Autophagy-related protein 2 homolog A                                       |
| 1.014           | 0.958        | 1.055        | 0.982        | 0.907        | 1.095        | 0.952        | 0.960        | 0.953        | 1.013         | 0.958         | 1.130         | Q9UL15-2     | BAG5      | Isoform 2 of BAG family molecular chaperone regulator 5                                  |
| 1.058           | 1.040        | 1.000        | 0.949        | 0.966        | 0.957        | 1.037        | 1.046        | 0.964        | 1.024         | 1.008         | 1.057         | Q9H4G0-2     | EPB41L1   | Isoform 2 of Band 4.1-like protein 1                                                     |
| 0.773           | 0.688        | 1.706        | 1.094        | 0.889        | 0.885        |              |              |              | 0.949         | 1.083         | 0.847         | Q96RK4-2     | BBS4      | Isoform 2 of Bardet-Biedl syndrome 4 protein                                             |
| 1.047           | 1.044        | 1.082        | 1.030        | 0.941        | 1.014        | 1.053        | 1.070        | 1.051        | 1.047         | 1.085         | 1.076         | P55061-2     | TMBIM6    | Isoform 2 of Bax inhibitor 1                                                             |
| 0.993           | 1.005        | 0.912        | 0.891        | 0.990        | 1.023        | 1.013        | 1.112        | 1.021        | 1.029         | 1.025         | 1.088         | Q4VC05-2     | BCL7A     | Isoform 2 of B-cell CLL/lymphoma 7 protein family member A                               |
| 0.916           | 0.976        | 1.039        | 0.960        | 0.943        | 0.989        | 0.956        | 0.885        | 0.954        | 1.030         | 1.054         | 1.006         | P51572-2     | BCAP31    | Isoform 2 of B-cell receptor-associated protein 31                                       |
| 1.046           | 1.017        | 1.055        | 0.977        | 0.987        | 1.050        | 0.982        | 1.074        | 0.984        | 1.013         | 0.939         | 1.056         | P55957-2     | BID       | Isoform 2 of BH3-interacting domain death agonist                                        |
| 0.962           | 1.007        | 0.986        | 0.980        | 0.986        | 1.071        | 1.030        | 1.106        | 1.032        | 1.066         | 1.029         | 1.034         | Q13057-2     | COASY     | Isoform 2 of Bifunctional coenzyme A synthase                                            |
| 1.028           | 1.042        | 1.017        | 0.994        | 0.958        | 0.992        | 1.009        | 1.058        | 0.999        | 1.015         | 0.988         | 1.000         | Q9Y223-2     | GNE       | Isoform 2 of Bifunctional UDP-N-acetylglucosamine 2-epimerase/N-acetylmannosamine kinase |
| 1.035           | 1.020        | 1.021        | 0.995        | 0.987        | 0.950        | 1.033        | 1.090        | 1.012        | 1.104         | 0.946         | 1.045         | P43251-2     | BTB       | Isoform 2 of Biotinidase                                                                 |
| 0.946           | 1.080        | 0.945        | 0.873        | 0.855        | 0.996        | 1.025        | 1.085        | 1.199        | 0.960         | 0.998         | 1.094         | Q6UWU4-2     | C6orf89   | Isoform 2 of Bombesin receptor-activated protein C6orf89                                 |
|                 |              |              | 1.000        | 0.900        | 1.046        | 0.937        | 1.183        | 0.976        | 0.925         | 0.923         | 1.038         | Q9P287-2     | BCCIP     | Isoform 2 of BRCA2 and CDKN1A-interacting protein                                        |
| 1.093           | 0.994        | 0.995        | 1.010        | 0.931        | 0.981        | 1.073        | 1.063        | 1.034        | 0.985         | 0.979         | 0.971         | O95696-2     | BRD1      | Isoform 2 of Bromodomain-containing protein 1                                            |

| Abundance Ratio |              |              |              |              |              |              |              |              |               |               |               | Accession ID | Gene name | Protein Description                                                |
|-----------------|--------------|--------------|--------------|--------------|--------------|--------------|--------------|--------------|---------------|---------------|---------------|--------------|-----------|--------------------------------------------------------------------|
| 1 d<br>M1/C1    | 1 d<br>M2/C2 | 1 d<br>M3/C3 | 4 d<br>M1/C1 | 4 d<br>M2/C2 | 4 d<br>M3/C3 | 7 d<br>M1/C1 | 7 d<br>M2/C2 | 7 d<br>M3/C3 | 10 d<br>M1/C1 | 10 d<br>M2/C2 | 10 d<br>M3/C3 |              |           |                                                                    |
| 1.031           | 0.974        | 0.991        | 0.948        | 0.942        | 1.007        | 1.013        | 0.952        | 0.985        | 0.963         | 1.106         | 1.063         | Q9NPI1-2     | BRD7      | Isoform 2 of Bromodomain-containing protein 7                      |
| 0.976           | 1.008        | 1.026        | 1.009        | 0.905        | 0.983        | 1.031        | 1.007        | 1.084        | 1.068         | 0.988         | 1.108         | Q9H0E9-2     | BRD8      | Isoform 2 of Bromodomain-containing protein 8                      |
| 0.815           | 0.808        | 1.365        |              |              |              |              |              |              |               |               |               | Q9BSF8-2     | BTBD10    | Isoform 2 of BTB/POZ domain-containing protein 10                  |
| 1.018           | 1.047        | 0.987        | 0.986        | 0.962        | 1.019        | 0.972        | 0.909        | 0.917        | 1.002         | 0.993         | 1.076         | Q7KYR7-1     | BTN2A1    | Isoform 2 of Butyrophilin subfamily 2 member A1                    |
| 1.101           | 0.968        | 1.011        | 0.995        | 1.044        | 1.036        | 0.994        | 1.123        | 1.134        | 1.021         | 1.091         | 1.018         | Q8WUQ7-2     | CACTIN    | Isoform 2 of Cactin                                                |
|                 |              |              | 1.397        | 1.196        | 0.879        | 0.965        | 0.944        | 1.059        |               |               |               | Q99828-2     | CIB1      | Isoform 2 of Calcium and integrin-binding protein 1                |
| 0.992           | 1.009        | 1.005        | 1.005        | 0.955        | 0.980        | 0.995        | 1.063        | 0.993        | 0.982         | 0.981         | 0.959         | Q9UJS0-2     | SLC25A13  | Isoform 2 of Calcium-binding mitochondrial carrier protein Aralar2 |
| 1.073           | 0.972        | 1.054        | 0.995        | 0.969        | 1.066        | 0.971        | 0.954        | 0.977        | 0.976         | 0.900         | 1.140         | Q9P1Y5-2     | CAMSAP3   | Isoform 2 of Calmodulin-regulated spectrin-associated protein 3    |
| 0.922           | 1.007        | 0.973        | 0.989        | 0.936        | 0.973        | 1.006        | 1.010        | 0.962        | 1.052         | 1.051         | 1.054         | P27824-2     | CANX      | Isoform 2 of Calnexin                                              |
| 0.994           | 1.017        | 1.079        | 0.961        | 0.918        | 1.008        | 0.951        | 1.041        | 0.943        | 1.000         | 1.003         | 1.005         | Q9UDT6-2     | CLIP2     | Isoform 2 of CAP-Gly domain-containing linker protein 2            |
| 1.016           | 1.050        | 1.037        | 1.093        | 0.953        | 1.105        | 1.054        | 1.164        | 1.230        | 1.107         | 1.100         | 1.128         | Q9Y6M4-2     | CSNK1G3   | Isoform 2 of Casein kinase I isoform gamma-3                       |
| 0.980           | 0.972        | 1.017        | 0.980        | 0.930        | 1.033        | 0.982        | 0.978        | 1.000        | 1.004         | 0.994         | 1.048         | Q9H078-2     | CLPB      | Isoform 2 of Caseinolytic peptidase B protein homolog              |
| 1.000           | 1.020        | 1.035        | 0.998        | 0.971        | 1.048        | 1.023        | 1.005        | 1.052        | 1.024         | 0.958         | 1.049         | Q96LW7-2     | CARD19    | Isoform 2 of Caspase recruitment domain-containing protein 19      |
| 0.985           | 1.019        | 0.989        | 0.993        | 1.000        | 1.056        | 0.993        | 1.047        | 1.017        | 1.000         | 1.019         | 1.033         | O43310-2     | CTIF      | Isoform 2 of CBP80/20-dependent translation initiation factor      |
| 0.967           | 0.998        | 0.991        | 0.980        | 0.972        | 1.001        | 0.972        | 0.986        | 1.006        | 1.029         | 1.000         | 1.037         | Q15642-2     | TRIP10    | Isoform 2 of Cdc42-interacting protein 4                           |
| 0.998           | 1.009        | 0.987        | 0.986        | 0.943        | 1.006        | 1.024        | 1.025        | 1.017        | 1.028         | 1.007         | 1.119         | P30260-2     | CDC27     | Isoform 2 of Cell division cycle protein 27 homolog                |
|                 |              |              |              |              |              | 0.933        | 0.835        | 0.947        |               |               |               | Q5SW79-2     | CEP170    | Isoform 2 of Centrosomal protein of 170 kDa                        |
| 1.016           | 0.825        | 0.688        | 1.086        | 1.311        | 1.130        | 1.114        | 1.323        | 1.280        |               |               |               | Q5JTW2-2     | CEP78     | Isoform 2 of Centrosomal protein of 78 kDa                         |
| 1.039           | 1.005        | 1.035        | 1.047        | 0.885        | 0.975        | 0.968        | 1.099        | 1.035        | 1.025         | 0.933         | 1.134         | Q8IW35-2     | CEP97     | Isoform 2 of Centrosomal protein of 97 kDa                         |
| 0.959           | 1.022        | 1.053        | 1.004        | 0.898        | 1.006        | 1.053        | 1.077        | 1.013        | 1.034         | 1.077         | 0.988         | Q6ZMG9-2     | CERS6     | Isoform 2 of Ceramide synthase 6                                   |
| 1.031           | 0.977        | 0.977        | 0.965        | 1.101        | 1.084        | 1.038        | 1.107        | 1.075        | 1.055         | 1.044         | 1.064         | Q9BY43-2     | CHMP4A    | Isoform 2 of Charged multivesicular body protein 4a                |
| 0.944           | 0.977        | 1.017        | 1.154        | 0.752        | 0.934        | 1.126        | 0.896        | 1.029        | 1.031         | 1.103         | 1.031         | Q8WWI5-2     | SLC44A1   | Isoform 2 of Choline transporter-like protein 1                    |
| 1.000           | 0.973        | 1.054        | 1.093        | 0.982        | 0.981        | 0.979        | 1.036        | 1.132        | 0.999         | 1.063         | 0.963         | Q8IWA5-2     | SLC44A2   | Isoform 2 of Choline transporter-like protein 2                    |
| 0.901           | 1.042        | 0.957        | 0.980        | 0.967        | 0.952        | 0.894        | 0.976        | 0.960        | 0.951         | 1.152         | 0.911         | Q9Y3Y2-3     | CHTOP     | Isoform 2 of Chromatin target of PRMT1 protein                     |
| 0.992           | 1.006        | 1.004        | 1.000        | 0.979        | 1.013        | 1.039        | 0.997        | 1.023        | 0.994         | 0.995         | 1.029         | Q14839-2     | CHD4      | Isoform 2 of Chromodomain-helicase-DNA-binding protein 4           |
| 1.015           | 1.058        | 1.040        | 0.998        | 0.940        | 1.070        | 1.021        | 1.041        | 1.022        | 0.944         | 0.989         | 1.023         | Q8WVB6-2     | CHTF18    | Isoform 2 of Chromosome transmission fidelity protein 18 homolog   |

| Abundance Ratio |              |              |              |              |              |              |              |              |               |               |               | Accession ID | Gene name | Protein Description                                                          |
|-----------------|--------------|--------------|--------------|--------------|--------------|--------------|--------------|--------------|---------------|---------------|---------------|--------------|-----------|------------------------------------------------------------------------------|
| 1 d<br>M1/C1    | 1 d<br>M2/C2 | 1 d<br>M3/C3 | 4 d<br>M1/C1 | 4 d<br>M2/C2 | 4 d<br>M3/C3 | 7 d<br>M1/C1 | 7 d<br>M2/C2 | 7 d<br>M3/C3 | 10 d<br>M1/C1 | 10 d<br>M2/C2 | 10 d<br>M3/C3 |              |           |                                                                              |
| 1.093           | 1.004        | 1.035        | 1.039        | 0.971        | 1.003        | 0.971        | 0.970        | 1.019        | 1.017         | 1.053         | 1.010         | Q9ULV3-2     | CIZ1      | Isoform 2 of Cip1-interacting zinc finger protein                            |
| 0.963           | 0.992        | 0.978        | 0.974        | 1.051        | 0.996        | 0.985        | 0.887        | 0.976        | 1.018         | 1.010         | 1.033         | Q16630-2     | CPSF6     | Isoform 2 of Cleavage and polyadenylation specificity factor subunit 6       |
| 1.027           | 1.057        | 1.107        | 0.984        | 0.917        | 1.109        | 1.063        | 1.047        | 1.021        | 1.177         | 1.046         | 1.114         | P10909-2     | CLU       | Isoform 2 of Clusterin                                                       |
| 0.997           | 0.998        | 0.997        | 0.986        | 0.918        | 1.013        | 0.991        | 1.004        | 1.014        | 0.947         | 0.963         | 0.981         | Q8N3U4-2     | STAG2     | Isoform 2 of Cohesin subunit SA-2                                            |
|                 |              |              |              |              |              | 1.455        | 0.708        | 1.005        |               |               |               | Q8TD31-2     | CCHCR1    | Isoform 2 of Coiled-coil alpha-helical rod protein 1                         |
| 1.009           | 0.975        | 1.035        | 0.993        | 0.961        | 1.010        | 0.987        | 0.994        | 1.013        | 1.037         | 1.037         | 1.058         | Q5T0F9-2     | CC2D1B    | Isoform 2 of Coiled-coil and C2 domain-containing protein 1B                 |
| 1.092           | 0.803        | 1.519        |              |              |              |              |              |              |               |               |               | Q6ZP82-2     | CCDC141   | Isoform 2 of Coiled-coil domain-containing protein 141                       |
| 1.001           | 0.963        | 1.057        | 0.984        | 0.985        | 1.021        | 0.960        | 0.837        | 0.975        | 1.023         | 0.990         | 1.089         | Q8IVM0-2     | CCDC50    | Isoform 2 of Coiled-coil domain-containing protein 50                        |
|                 |              |              |              |              |              |              |              |              | 1.159         | 0.943         | 1.214         | Q9BSY4-2     | CHCHD5    | Isoform 2 of Coiled-coil-helix-coiled-coil-helix domain-containing protein 5 |
| 1.002           | 0.959        | 1.029        | 0.994        | 0.900        | 0.985        | 1.121        | 1.025        | 0.963        | 0.818         | 0.846         | 1.093         | Q86XI2-2     | NCAPG2    | Isoform 2 of Condensin-2 complex subunit G2                                  |
| 1.002           | 1.021        | 1.041        | 0.983        | 0.955        | 1.025        | 0.959        | 1.029        | 0.998        | 0.969         | 0.999         | 1.057         | Q9UP83-2     | COG5      | Isoform 2 of Conserved oligomeric Golgi complex subunit 5                    |
| 0.929           | 0.995        | 1.023        | 0.923        | 0.981        | 1.095        | 0.965        | 0.904        | 1.021        | 1.014         | 1.005         | 1.063         | Q13098-7     | GPS1      | Isoform 2 of COP9 signalosome complex subunit 1                              |
| 1.010           | 1.067        | 1.043        |              |              |              |              |              |              |               |               |               | Q04656-3     | ATP7A     | Isoform 2 of Copper-transporting ATPase 1                                    |
| 0.992           | 0.967        | 0.935        | 0.957        | 1.007        | 0.976        | 1.011        | 0.891        | 0.922        | 1.043         | 0.991         | 1.121         | Q13951-2     | CBFB      | Isoform 2 of Core-binding factor subunit beta                                |
| 0.987           | 0.899        | 1.137        | 1.025        | 0.976        | 0.988        | 1.082        | 0.865        | 0.978        | 0.901         | 0.925         | 0.883         | P12532-2     | CKMT1A    | Isoform 2 of Creatine kinase U-type, mitochondrial                           |
| 1.036           | 1.028        | 0.974        | 0.932        | 0.949        | 0.997        | 1.024        | 1.029        | 1.018        | 1.032         | 1.061         | 0.994         | Q6UUUV9-2    | CRTC1     | Isoform 2 of CREB-regulated transcription coactivator 1                      |
| 0.968           | 1.066        | 1.067        |              |              |              |              |              |              |               |               |               | Q96AY2-2     | EME1      | Isoform 2 of Crossover junction endonuclease EME1                            |
| 0.983           | 1.001        | 1.001        | 0.988        | 0.996        | 1.028        | 0.962        | 0.997        | 1.009        | 0.989         | 1.026         | 1.059         | P56545-2     | CTBP2     | Isoform 2 of C-terminal-binding protein 2                                    |
| 0.983           | 1.014        | 0.996        | 1.010        | 1.074        | 0.985        | 1.013        | 0.994        | 0.987        | 0.994         | 1.016         | 0.997         | Q13617-2     | CUL2      | Isoform 2 of Cullin-2                                                        |
| 0.987           | 0.977        | 1.111        | 1.002        | 0.951        | 0.986        | 1.052        | 1.147        | 1.030        | 0.925         | 1.075         | 1.045         | Q14999-2     | CUL7      | Isoform 2 of Cullin-7                                                        |
| 1.101           | 1.066        | 0.944        | 1.006        | 0.936        | 0.913        | 1.099        | 1.063        | 0.975        | 1.143         | 1.053         | 1.098         | Q9P0U4-2     | CXXC1     | Isoform 2 of CXXC-type zinc finger protein 1                                 |
| 0.998           | 1.013        | 0.942        | 1.022        | 0.964        | 1.058        | 0.990        | 1.071        | 1.039        | 1.030         | 1.031         | 1.072         | Q00536-2     | CDK16     | Isoform 2 of Cyclin-dependent kinase 16                                      |
| 1.003           | 1.000        | 1.013        | 0.972        | 0.961        | 1.033        | 1.039        | 1.053        | 1.019        | 1.013         | 1.005         | 1.073         | P50750-2     | CDK9      | Isoform 2 of Cyclin-dependent kinase 9                                       |
| 1.063           | 0.979        | 1.032        | 0.943        | 0.949        | 0.994        | 0.891        | 0.974        | 1.070        | 1.005         | 0.974         | 0.958         | O60583-2     | CCNT2     | Isoform 2 of Cyclin-T2                                                       |
| 0.941           | 0.980        | 1.003        | 1.026        | 0.965        | 1.036        | 1.067        | 0.962        | 1.013        | 1.080         | 0.995         | 1.142         | P35520-2     | CBS       | Isoform 2 of Cystathionine beta-synthase                                     |
| 1.055           | 1.022        | 0.962        | 0.985        | 0.952        | 1.009        | 0.995        | 1.062        | 1.031        | 0.977         | 1.011         | 0.983         | Q9Y4P1-2     | ATG4B     | Isoform 2 of Cysteine protease ATG4B                                         |



| Abundance Ratio |              |              |              |              |              |              |              |              |               |               |               | Accession ID | Gene name | Protein Description                                                                   |
|-----------------|--------------|--------------|--------------|--------------|--------------|--------------|--------------|--------------|---------------|---------------|---------------|--------------|-----------|---------------------------------------------------------------------------------------|
| 1 d<br>M1/C1    | 1 d<br>M2/C2 | 1 d<br>M3/C3 | 4 d<br>M1/C1 | 4 d<br>M2/C2 | 4 d<br>M3/C3 | 7 d<br>M1/C1 | 7 d<br>M2/C2 | 7 d<br>M3/C3 | 10 d<br>M1/C1 | 10 d<br>M2/C2 | 10 d<br>M3/C3 |              |           |                                                                                       |
| 0.992           | 0.980        | 0.987        | 0.976        | 0.854        | 1.129        | 0.938        | 0.889        | 1.018        | 1.083         | 1.084         | 1.009         | Q9NYJ1-2     | COA4      | Isoform 2 of Cytochrome c oxidase assembly factor 4 homolog, mitochondrial            |
| 1.006           | 0.969        | 1.010        | 1.011        | 0.949        | 0.946        | 1.008        | 0.969        | 0.985        | 1.048         | 1.043         | 1.023         | Q5JTJ3-2     | COA6      | Isoform 2 of Cytochrome c oxidase assembly factor 6 homolog                           |
| 1.014           | 1.026        | 1.024        | 1.058        | 1.071        | 0.963        | 1.058        | 1.020        | 1.002        | 1.070         | 1.035         | 1.037         | Q5RI15-2     | COX20     | Isoform 2 of Cytochrome c oxidase protein 20 homolog                                  |
| 1.018           | 0.994        | 1.041        | 0.991        | 0.931        | 1.010        | 1.002        | 1.060        | 1.028        | 0.978         | 0.958         | 1.022         | Q8NCM8-2     | DYNC2H1   | Isoform 2 of Cytoplasmic dynein 2 heavy chain 1                                       |
| 1.165           | 0.843        | 1.047        | 0.735        | 0.934        | 1.058        | 0.860        | 1.253        | 1.166        | 0.930         | 0.984         | 1.128         | Q96F07-2     | CYFIP2    | Isoform 2 of Cytoplasmic FMR1-interacting protein 2                                   |
| 0.900           | 0.987        | 1.164        |              |              |              |              |              |              |               |               |               | Q15038-2     | DAZAP2    | Isoform 2 of DAZ-associated protein 2                                                 |
| 1.010           | 0.805        | 0.741        | 1.019        | 0.862        | 3.006        |              |              |              | 0.898         | 1.021         | 1.054         | Q86SQ9-2     | DHDDS     | Isoform 2 of Dehydrodolichyl diphosphate synthase complex subunit DHDDS               |
| 1.004           | 1.030        | 0.972        | 1.002        | 0.981        | 0.961        | 0.962        | 1.006        | 1.004        | 1.019         | 1.051         | 0.978         | P32321-2     | DCTD      | Isoform 2 of Deoxycytidylate deaminase                                                |
| 1.000           | 1.020        | 1.020        | 0.990        | 0.982        | 1.022        | 0.990        | 1.093        | 1.022        | 0.959         | 0.999         | 1.018         | Q86TI2-2     | DPP9      | Isoform 2 of Dipeptidyl peptidase 9                                                   |
|                 |              |              | 1.034        | 0.934        | 1.124        |              |              |              |               |               |               | Q9NZJ9-2     | NUDT4     | Isoform 2 of Diphosphoinositol polyphosphate phosphohydrolase 2                       |
| 1.034           | 1.034        | 1.026        | 1.079        | 1.041        | 1.070        | 1.211        | 1.184        | 1.109        | 1.123         | 1.073         | 1.180         | Q96PD2-2     | DCBLD2    | Isoform 2 of Discoidin, CUB and LCCL domain-containing protein 2                      |
| 0.985           | 1.000        | 1.026        | 0.978        | 0.954        | 0.947        | 0.935        | 0.828        | 0.989        | 0.977         | 1.027         | 1.058         | Q12959-2     | DLG1      | Isoform 2 of Disks large homolog 1                                                    |
| 1.005           | 0.915        | 0.905        | 0.808        | 0.920        | 1.024        | 1.148        | 1.054        | 1.280        |               |               |               | Q16531-2     | DDB1      | Isoform 2 of DNA damage-binding protein 1                                             |
| 0.988           | 0.972        | 1.019        | 0.983        | 0.987        | 1.007        | 0.985        | 0.866        | 1.000        | 1.013         | 1.001         | 1.037         | Q92878-2     | RAD50     | Isoform 2 of DNA repair protein RAD50                                                 |
| 0.986           | 0.996        | 0.996        | 0.986        | 1.028        | 1.001        | 1.043        | 1.020        | 1.037        | 0.986         | 0.985         | 1.044         | P25205-2     | MCM3      | Isoform 2 of DNA replication licensing factor MCM3                                    |
| 1.100           | 0.992        | 1.026        | 0.999        | 1.036        | 0.968        | 1.015        | 1.062        | 1.097        | 0.989         | 1.024         | 1.043         | O15446-2     | CD3EAP    | Isoform 2 of DNA-directed RNA polymerase I subunit RPA34                              |
| 1.001           | 1.008        | 1.007        | 0.977        | 0.963        | 1.041        | 1.015        | 1.013        | 0.993        | 0.988         | 1.037         | 1.008         | Q9GZ51-2     | POLR1E    | Isoform 2 of DNA-directed RNA polymerase I subunit RPA49                              |
| 1.158           | 1.085        | 1.012        | 1.039        | 0.917        | 1.167        |              |              |              |               |               |               | Q9Y2S0-2     | POLR1D    | Isoform 2 of DNA-directed RNA polymerases I and III subunit RPAC2                     |
| 0.903           | 0.984        | 0.911        | 0.928        | 0.850        | 1.329        | 1.049        | 0.881        | 0.992        | 1.201         | 1.103         | 1.096         | Q9P2X0-2     | DPM3      | Isoform 2 of Dolichol-phosphate mannosyltransferase subunit 3                         |
| 0.933           | 0.977        | 0.994        | 0.977        | 0.946        | 0.999        | 0.951        | 1.057        | 1.013        | 0.986         | 1.030         | 0.966         | P04844-2     | RPN2      | Isoform 2 of Dolichyl-diphosphooligosaccharide--protein glycosyltransferase subunit 2 |
| 1.003           | 1.065        | 1.033        | 1.048        | 1.011        | 0.988        | 1.101        | 0.777        | 1.150        | 1.087         | 1.040         | 1.272         | Q9UJU6-2     | DBNL      | Isoform 2 of Drebrin-like protein                                                     |
| 0.984           | 1.040        | 1.016        | 0.989        | 0.959        | 1.016        | 1.006        | 1.080        | 0.995        | 0.979         | 0.976         | 1.020         | P46734-3     | MAP2K3    | Isoform 2 of Dual specificity mitogen-activated protein kinase kinase 3               |
| 1.018           | 1.024        | 1.022        | 0.977        | 0.976        | 1.037        | 0.994        | 1.092        | 1.048        | 1.018         | 1.015         | 1.044         | P45985-2     | MAP2K4    | Isoform 2 of Dual specificity mitogen-activated protein kinase kinase 4               |

| Abundance Ratio |              |              |              |              |              |              |              |              |               |               |               | Accession ID | Gene name | Protein Description                                               |
|-----------------|--------------|--------------|--------------|--------------|--------------|--------------|--------------|--------------|---------------|---------------|---------------|--------------|-----------|-------------------------------------------------------------------|
| 1 d<br>M1/C1    | 1 d<br>M2/C2 | 1 d<br>M3/C3 | 4 d<br>M1/C1 | 4 d<br>M2/C2 | 4 d<br>M3/C3 | 7 d<br>M1/C1 | 7 d<br>M2/C2 | 7 d<br>M3/C3 | 10 d<br>M1/C1 | 10 d<br>M2/C2 | 10 d<br>M3/C3 |              |           |                                                                   |
| 1.056           | 0.944        | 1.053        | 0.798        | 1.091        | 1.146        | 1.038        | 1.330        | 0.903        | 1.285         | 0.898         | 1.010         | Q9NRW4-2     | DUSP22    | Isoform 2 of Dual specificity protein phosphatase 22              |
| 0.989           | 1.006        | 0.997        | 0.984        | 0.960        | 0.995        | 1.013        | 1.053        | 0.998        | 1.003         | 0.973         | 1.014         | Q13561-2     | DCTN2     | Isoform 2 of Dynactin subunit 2                                   |
| 0.994           | 0.980        | 1.030        | 1.009        | 0.984        | 1.007        | 1.004        | 1.015        | 1.039        | 1.012         | 0.999         | 1.040         | O60313-2     | OPA1      | Isoform 2 of Dynamin-like 120 kDa protein, mitochondrial          |
|                 |              |              |              |              |              |              |              |              | 0.882         | 1.060         | 0.891         | O75925-2     | PIAS1     | Isoform 2 of E3 SUMO-protein ligase PIAS1                         |
|                 |              |              | 1.001        | 0.946        | 1.182        | 1.096        | 0.912        | 1.140        | 0.996         | 0.874         | 1.133         | Q9NWF9-1     | RNF216    | Isoform 2 of E3 ubiquitin-protein ligase RNF216                   |
|                 |              |              | 0.999        | 1.014        | 1.065        | 1.073        | 0.876        | 0.915        | 0.979         | 1.100         | 1.065         | Q8IUQ4-2     | SIAH1     | Isoform 2 of E3 ubiquitin-protein ligase SIAH1                    |
| 1.102           | 1.156        | 1.110        |              |              |              |              |              |              | 0.965         | 0.863         | 1.328         | Q14669-2     | TRIP12    | Isoform 2 of E3 ubiquitin-protein ligase TRIP12                   |
| 1.117           | 1.044        | 1.051        | 0.969        | 0.936        | 1.036        | 0.994        | 0.967        | 1.082        | 0.975         | 1.043         | 1.042         | O60447-2     | EVI5      | Isoform 2 of Ecotropic viral integration site 5 protein homolog   |
| 1.133           | 1.055        | 0.811        | 0.962        | 1.004        | 0.940        | 1.087        | 1.249        | 1.071        | 0.960         | 0.922         | 1.210         | Q9BSW2-2     | CRACR2A   | Isoform 2 of EF-hand calcium-binding domain-containing protein 4B |
| 1.024           | 0.961        | 1.013        | 1.035        | 0.963        | 1.039        | 1.033        | 1.068        | 1.031        | 1.071         | 0.965         | 1.027         | Q8NDI1-2     | EHBP1     | Isoform 2 of EH domain-binding protein 1                          |
| 1.049           | 1.007        | 0.997        | 1.007        | 0.920        | 0.916        | 0.942        | 1.009        | 0.968        | 0.933         | 1.032         | 0.911         | Q15717-2     | ELAVL1    | Isoform 2 of ELAV-like protein 1                                  |
| 1.244           | 0.990        | 1.117        |              |              |              | 1.078        | 1.001        | 0.934        |               |               |               | P68104-2     | EEF1A1    | Isoform 2 of Elongation factor 1-alpha 1                          |
| 1.025           | 1.012        | 1.016        | 1.012        | 1.005        | 1.025        | 0.992        | 1.073        | 1.010        | 0.964         | 1.024         | 0.957         | P26641-2     | EEF1G     | Isoform 2 of Elongation factor 1-gamma                            |
| 0.831           | 0.934        | 1.001        | 0.788        | 0.973        | 1.014        | 1.069        | 0.683        | 1.034        | 1.132         | 1.130         | 1.080         | Q9NYP7-2     | ELOVL5    | Isoform 2 of Elongation of very long chain fatty acids protein 5  |
| 0.988           | 1.018        | 1.001        | 0.995        | 1.018        | 0.999        | 0.994        | 1.034        | 0.996        | 0.990         | 0.949         | 0.990         | Q9NZ08-2     | ERAP1     | Isoform 2 of Endoplasmic reticulum aminopeptidase 1               |
| 0.991           | 0.970        | 1.030        | 0.998        | 0.960        | 1.024        | 1.021        | 1.017        | 0.987        | 1.000         | 0.981         | 1.011         | Q9UBC2-2     | EPS15L1   | Isoform 2 of Epidermal growth factor receptor substrate 15-like 1 |
| 1.005           | 1.002        | 1.042        | 1.072        | 0.885        | 0.991        | 1.012        | 0.971        | 0.997        | 0.999         | 0.959         | 0.937         | Q9NRG7-2     | SDR39U1   | Isoform 2 of Epimerase family protein SDR39U1                     |
| 1.015           | 1.029        | 1.024        | 1.008        | 0.979        | 1.038        | 0.976        | 1.020        | 1.053        | 0.964         | 1.069         | 0.998         | Q9Y6I3-1     | EPN1      | Isoform 2 of Epsin-1                                              |
| 0.868           | 0.965        | 0.895        | 1.028        | 0.789        | 1.147        | 1.185        | 0.956        | 1.057        | 1.223         | 0.990         | 1.218         | Q99808-2     | SLC29A1   | Isoform 2 of Equilibrative nucleoside transporter 1               |
| 0.983           | 1.001        | 1.002        | 0.996        | 0.980        | 0.970        | 0.971        | 1.021        | 1.019        | 1.023         | 1.032         | 1.020         | Q14240-2     | EIF4A2    | Isoform 2 of Eukaryotic initiation factor 4A-II                   |
| 0.983           | 1.004        | 1.001        | 1.005        | 1.033        | 1.009        | 1.007        | 0.991        | 1.015        | 0.984         | 0.990         | 1.006         | P55884-2     | EIF3B     | Isoform 2 of Eukaryotic translation initiation factor 3 subunit B |
| 0.990           | 0.990        | 0.966        | 1.015        | 0.991        | 1.021        | 1.020        | 1.088        | 1.021        | 0.979         | 0.991         | 1.022         | P63241-2     | EIF5A     | Isoform 2 of Eukaryotic translation initiation factor 5A-1        |
| 1.086           | 1.071        | 1.018        |              |              |              |              |              |              |               |               |               | Q96CN4-2     | EVI5L     | Isoform 2 of EVI5-like protein                                    |
| 1.015           | 0.962        | 1.031        | 0.960        | 0.955        | 1.010        | 0.936        | 1.066        | 1.045        | 0.921         | 0.983         | 0.968         | Q06265-2     | EXOSC9    | Isoform 2 of Exosome complex component RRP45                      |
|                 |              |              | 1.312        | 0.864        | 1.347        |              |              |              | 0.995         | 0.950         | 1.014         | Q9BSJ8-2     | ESYT1     | Isoform 2 of Extended synaptotagmin-1                             |
| 0.977           | 1.010        | 0.989        | 0.985        | 0.962        | 1.019        | 1.009        | 1.037        | 0.992        | 1.027         | 0.999         | 0.989         | A0FGR8-2     | ESYT2     | Isoform 2 of Extended synaptotagmin-2                             |
|                 |              |              |              |              |              |              |              |              | 0.922         | 1.143         | 0.863         | Q86XX4-2     | FRAS1     | Isoform 2 of Extracellular matrix protein FRAS1                   |

| Abundance Ratio |              |              |              |              |              |              |              |              |               |               |               | Accession ID | Gene name | Protein Description                                      |
|-----------------|--------------|--------------|--------------|--------------|--------------|--------------|--------------|--------------|---------------|---------------|---------------|--------------|-----------|----------------------------------------------------------|
| 1 d<br>M1/C1    | 1 d<br>M2/C2 | 1 d<br>M3/C3 | 4 d<br>M1/C1 | 4 d<br>M2/C2 | 4 d<br>M3/C3 | 7 d<br>M1/C1 | 7 d<br>M2/C2 | 7 d<br>M3/C3 | 10 d<br>M1/C1 | 10 d<br>M2/C2 | 10 d<br>M3/C3 |              |           |                                                          |
| 1.060           | 1.023        | 0.989        | 1.123        | 1.126        | 1.069        | 1.000        | 1.172        | 0.910        | 1.074         | 0.991         | 1.184         | Q96AE4-2     | FUBP1     | Isoform 2 of Far upstream element-binding protein 1      |
| 1.099           | 0.979        | 0.929        | 1.221        | 0.778        | 1.137        | 1.515        | 0.805        | 0.993        | 1.055         | 0.900         | 1.050         | Q9NVQ4-2     | FAIM      | Isoform 2 of Fas apoptotic inhibitory molecule 1         |
| 0.891           | 0.883        | 0.944        | 0.908        | 0.817        | 0.935        | 0.830        | 0.779        | 1.013        | 0.889         | 0.846         | 1.040         | Q9UHY8-2     | FEZ2      | Isoform 2 of Fasciculation and elongation protein zeta-2 |
| 0.990           | 0.994        | 1.001        | 1.051        | 1.081        | 1.035        | 1.111        | 0.990        | 1.057        | 1.094         | 1.030         | 1.032         | P51648-2     | ALDH3A2   | Isoform 2 of Fatty aldehyde dehydrogenase                |
| 0.945           | 0.951        | 1.216        |              |              |              |              |              |              |               |               |               | Q8NFX0-2     | FBXO18    | Isoform 2 of F-box DNA helicase 1                        |
| 1.005           | 1.036        | 1.035        | 1.017        | 0.964        | 1.039        | 0.995        | 1.057        | 0.987        | 0.972         | 0.992         | 1.089         | Q96NE9-2     | FRMD6     | Isoform 2 of FERM domain-containing protein 6            |
|                 |              |              | 1.050        | 0.804        | 1.048        | 1.320        | 1.142        | 0.973        |               |               |               | Q6ZNA5-2     | FRRS1     | Isoform 2 of Ferric-chelate reductase 1                  |
| 0.974           | 0.986        | 0.991        | 0.998        | 0.972        | 1.012        | 1.035        | 1.047        | 1.037        | 1.059         | 1.011         | 1.038         | P22830-2     | FECH      | Isoform 2 of Ferrochelatase, mitochondrial               |
| 1.026           | 1.052        | 1.079        | 1.123        | 1.039        | 0.913        |              |              |              |               |               |               | Q9UM11-2     | FZR1      | Isoform 2 of Fizzy-related protein homolog               |
| 0.761           | 1.095        | 0.871        | 0.934        | 1.026        | 1.089        | 1.014        | 0.958        | 0.886        |               |               |               | Q5T1M5-2     | FKBP15    | Isoform 2 of FK506-binding protein 15                    |
| 0.985           | 1.009        | 1.003        | 0.989        | 0.959        | 1.033        | 1.006        | 1.027        | 0.991        | 1.031         | 1.002         | 1.075         | Q8N3X1-2     | FNBP4     | Isoform 2 of Formin-binding protein 4                    |
| 0.992           | 1.018        | 1.043        | 0.991        | 0.937        | 1.002        | 0.976        | 0.967        | 0.954        | 0.977         | 0.889         | 1.036         | Q96PY5-3     | FMNL2     | Isoform 2 of Formin-like protein 2                       |
| 1.069           | 1.007        | 0.995        | 0.980        | 1.060        | 0.980        | 0.961        | 0.968        | 0.987        | 0.934         | 0.932         | 0.950         | P04075-2     | ALDOA     | Isoform 2 of Fructose-bisphosphate aldolase A            |
| 1.039           | 1.000        | 1.085        | 0.943        | 0.831        | 1.091        | 0.941        | 1.093        | 0.947        | 0.960         | 1.058         | 1.064         | Q8N612-2     | FAM160A2  | Isoform 2 of FTS and Hook-interacting protein            |
| 1.031           | 0.972        | 1.025        | 0.997        | 0.971        | 0.996        | 0.969        | 1.017        | 0.989        | 1.031         | 0.980         | 1.074         | P51570-2     | GALK1     | Isoform 2 of Galactokinase                               |
| 0.979           | 1.006        | 1.011        | 1.083        | 0.959        | 1.014        | 1.015        | 0.935        | 0.998        | 0.991         | 1.005         | 1.014         | O00214-2     | LGALS8    | Isoform 2 of Galectin-8                                  |
| 0.954           | 0.917        | 0.997        |              |              |              |              |              |              |               |               |               | P06396-2     | GSN       | Isoform 2 of Gelsolin                                    |
| 0.987           | 0.893        | 0.929        | 1.010        | 0.867        | 1.113        | 1.049        | 1.056        | 1.005        | 1.059         | 0.898         | 1.121         | O43826-2     | SLC37A4   | Isoform 2 of Glucose-6-phosphate exchanger SLC37A4       |
| 0.892           | 0.881        | 0.883        | 0.949        | 0.805        | 0.881        | 1.006        | 1.185        | 1.136        | 0.928         | 0.951         | 1.031         | Q9NS18-2     | GLRX2     | Isoform 2 of Glutaredoxin-2, mitochondrial               |
| 1.016           | 1.037        | 0.971        | 1.015        | 1.024        | 0.944        | 1.030        | 1.055        | 1.013        | 1.019         | 1.013         | 1.040         | P49841-2     | GSK3B     | Isoform 2 of Glycogen synthase kinase-3 beta             |
| 1.013           | 0.997        | 1.001        | 1.007        | 1.133        | 0.981        | 1.012        | 0.926        | 1.019        | 0.971         | 0.977         | 0.957         | Q9HC38-2     | GLOD4     | Isoform 2 of Glyoxalase domain-containing protein 4      |
| 0.960           | 0.971        | 0.984        | 0.983        | 0.940        | 0.983        | 1.006        | 0.894        | 0.933        | 1.032         | 1.007         | 1.027         | Q92896-2     | GLG1      | Isoform 2 of Golgi apparatus protein 1                   |
| 0.970           | 0.975        | 1.035        | 0.975        | 0.919        | 1.010        | 0.998        | 0.981        | 1.000        | 1.040         | 0.994         | 1.081         | Q14789-2     | GOLGB1    | Isoform 2 of Golgin subfamily B member 1                 |
| 0.905           | 0.741        | 0.928        | 1.106        | 1.055        | 0.857        | 0.891        | 1.142        | 0.794        | 0.964         | 0.784         | 1.112         | Q9UHW5-2     | GPN3      | Isoform 2 of GPN-loop GTPase 3                           |
| 0.985           | 0.930        | 0.943        | 1.074        | 0.932        | 0.969        | 1.185        | 1.186        | 0.970        | 1.078         | 1.115         | 1.175         | Q13480-2     | GAB1      | Isoform 2 of GRB2-associated-binding protein 1           |
| 1.005           | 0.956        | 1.005        | 1.007        | 0.991        | 1.019        | 1.030        | 1.017        | 0.997        | 0.999         | 0.968         | 1.031         | P52735-2     | VAV2      | Isoform 2 of Guanine nucleotide exchange factor VAV2     |
| 1.033           | 1.045        | 1.020        | 1.008        | 0.951        | 1.032        | 1.016        | 1.018        | 1.019        | 1.008         | 0.977         | 1.051         | Q16774-2     | GUK1      | Isoform 2 of Guanylate kinase                            |
| 1.007           | 0.996        | 0.969        | 1.036        | 1.001        | 1.038        | 1.063        | 1.149        | 1.159        | 1.273         | 1.200         | 1.155         | P51795-2     | CLCN5     | Isoform 2 of H(+)/Cl(-) exchange transporter 5           |
| 1.016           | 1.023        | 1.017        | 0.875        | 0.920        | 1.142        | 0.989        | 1.038        | 1.055        | 1.041         | 1.001         | 1.271         | Q99871-2     | HAUS7     | Isoform 2 of HAUS augmin-like complex subunit 7          |
|                 |              |              |              |              |              |              |              |              | 1.032         | 1.028         | 0.912         | Q9Y450-2     | HBS1L     | Isoform 2 of HBS1-like protein                           |
| 1.037           | 0.966        | 1.019        | 1.087        | 1.236        | 1.115        | 1.117        | 1.040        | 1.112        | 1.062         | 0.980         | 1.175         | O00165-2     | HAX1      | Isoform 2 of HCLS1-associated protein X-1                |

| Abundance Ratio |              |              |              |              |              |              |              |              |               |               |               | Accession ID | Gene name | Protein Description                                                  |
|-----------------|--------------|--------------|--------------|--------------|--------------|--------------|--------------|--------------|---------------|---------------|---------------|--------------|-----------|----------------------------------------------------------------------|
| 1 d<br>M1/C1    | 1 d<br>M2/C2 | 1 d<br>M3/C3 | 4 d<br>M1/C1 | 4 d<br>M2/C2 | 4 d<br>M3/C3 | 7 d<br>M1/C1 | 7 d<br>M2/C2 | 7 d<br>M3/C3 | 10 d<br>M1/C1 | 10 d<br>M2/C2 | 10 d<br>M3/C3 |              |           |                                                                      |
| 0.983           | 1.017        | 0.963        | 1.012        | 1.038        | 0.980        | 1.002        | 1.018        | 0.998        | 0.967         | 0.980         | 0.956         | P07900-2     | HSP90AA1  | Isoform 2 of Heat shock protein HSP 90-alpha                         |
| 1.027           | 1.036        | 0.941        | 1.020        | 1.091        | 0.942        | 1.133        | 1.159        | 0.980        |               |               |               | Q9H910-2     | HN1L      | Isoform 2 of Hematological and neurological expressed 1-like protein |
| 1.042           | 1.021        | 1.032        | 1.002        | 0.999        | 1.042        | 1.012        | 1.025        | 1.036        | 0.997         | 1.023         | 1.006         | P61978-2     | HNRNPK    | Isoform 2 of Heterogeneous nuclear ribonucleoprotein K               |
| 1.014           | 0.994        | 0.993        | 0.989        | 0.987        | 1.031        | 0.946        | 1.189        | 1.042        | 0.974         | 0.971         | 0.974         | O43390-2     | HNRNPR    | Isoform 2 of Heterogeneous nuclear ribonucleoprotein R               |
| 1.049           | 0.963        | 0.961        | 0.977        | 0.937        | 0.939        | 0.911        | 0.898        | 0.760        | 1.094         | 1.038         | 0.943         | Q8WVB3-2     | HEXDC     | Isoform 2 of Hexosaminidase D                                        |
| 1.413           | 1.252        | 1.379        | 1.125        | 1.088        | 0.837        | 0.559        | 1.071        | 0.943        | 0.818         | 1.028         | 0.577         | Q9Y241-2     | HIGD1A    | Isoform 2 of HIG1 domain family member 1A, mitochondrial             |
| 0.986           | 0.944        | 0.972        | 0.975        | 0.949        | 1.008        | 1.012        | 0.954        | 1.004        | 1.000         | 0.989         | 1.051         | Q9H7Z6-2     | KAT8      | Isoform 2 of Histone acetyltransferase KAT8                          |
| 1.079           | 1.008        | 1.013        | 1.089        | 0.957        | 1.128        | 1.134        | 1.157        | 0.810        | 1.025         | 1.007         | 0.865         | O15379-2     | HDAC3     | Isoform 2 of Histone deacetylase 3                                   |
| 1.060           | 0.969        | 1.008        | 0.848        | 0.821        | 0.914        | 0.893        | 1.106        | 1.122        | 0.961         | 0.920         | 1.241         | Q92800-2     | EZH1      | Isoform 2 of Histone-lysine N-methyltransferase EZH1                 |
| 1.020           | 0.978        | 1.033        | 0.945        | 0.981        | 0.981        | 0.977        | 1.169        | 0.943        | 0.953         | 0.893         | 1.155         | Q15910-2     | EZH2      | Isoform 2 of Histone-lysine N-methyltransferase EZH2                 |
| 0.986           | 1.118        | 1.003        |              |              |              |              |              |              |               |               |               | O43463-2     | SUV39H1   | Isoform 2 of Histone-lysine N-methyltransferase SUV39H1              |
|                 |              |              | 1.083        | 1.021        | 1.199        | 1.067        | 1.036        | 1.087        | 1.097         | 1.120         | 1.037         | Q6PII5-2     | HAGHL     | Isoform 2 of Hydroxyacylglutathione hydrolase-like protein           |
| 1.016           | 0.971        | 1.024        | 1.013        | 0.919        | 1.074        | 1.002        | 1.124        | 1.028        | 0.979         | 1.017         | 0.996         | Q9UI26-2     | IPO11     | Isoform 2 of Importin-11                                             |
| 0.978           | 1.016        | 1.030        | 0.998        | 0.963        | 1.025        | 1.017        | 1.105        | 1.063        | 1.012         | 1.017         | 1.022         | Q8TEX9-2     | IPO4      | Isoform 2 of Importin-4                                              |
| 1.002           | 1.005        | 1.003        | 0.980        | 0.993        | 1.038        | 1.076        | 1.049        | 1.021        | 1.033         | 1.019         | 1.095         | Q68E01-2     | INTS3     | Isoform 2 of Integrator complex subunit 3                            |
| 1.181           | 1.089        | 1.034        |              |              |              | 1.005        | 1.072        | 1.041        | 1.076         | 0.966         | 1.058         | Q7Z5L9-2     | IRF2BP2   | Isoform 2 of Interferon regulatory factor 2-binding protein 2        |
| 1.024           | 0.972        | 1.023        | 0.979        | 0.931        | 0.998        | 0.998        | 1.045        | 1.027        | 0.904         | 0.918         | 0.984         | P80217-2     | IFI35     | Isoform 2 of Interferon-induced 35 kDa protein                       |
| 1.025           | 0.943        | 0.950        | 0.958        | 1.095        | 1.038        | 1.070        | 1.057        | 1.060        | 1.058         | 1.039         | 1.040         | Q8IY31-2     | IFT20     | Isoform 2 of Intraflagellar transport protein 20 homolog             |
| 1.094           | 0.852        | 1.080        | 1.152        | 0.978        | 1.192        | 1.008        | 0.997        | 1.086        |               |               |               | Q96FT9-2     | IFT43     | Isoform 2 of Intraflagellar transport protein 43 homolog             |
| 0.961           | 0.834        | 1.348        | 0.905        | 0.932        | 1.553        | 0.930        | 1.044        | 0.963        | 0.952         | 0.975         | 1.153         | Q9NQC8-2     | IFT46     | Isoform 2 of Intraflagellar transport protein 46 homolog             |
| 0.993           | 1.010        | 1.035        | 0.989        | 0.990        | 1.066        | 1.004        | 1.010        | 1.056        | 1.075         | 1.020         | 1.056         | Q27J81-2     | INF2      | Isoform 2 of Inverted formin-2                                       |
| 1.003           | 1.007        | 1.051        | 0.956        | 0.980        | 1.022        | 0.984        | 0.986        | 1.041        | 1.000         | 1.007         | 1.033         | Q5JU85-2     | IQSEC2    | Isoform 2 of IQ motif and SEC7 domain-containing protein 2           |
| 0.988           | 1.003        | 0.999        | 0.979        | 0.957        | 0.943        | 1.015        | 1.010        | 0.911        | 1.026         | 0.983         | 1.037         | Q9BUE6-2     | ISCA1     | Isoform 2 of Iron-sulfur cluster assembly 1 homolog, mitochondrial   |
| 1.001           | 0.830        | 1.021        | 0.851        | 1.281        | 0.893        | 0.926        | 1.001        | 0.951        | 0.957         | 0.851         | 1.243         | Q05084-2     | ICA1      | Isoform 2 of Islet cell autoantigen 1                                |

| Abundance Ratio |              |              |              |              |              |              |              |              |               |               |               | Accession ID | Gene name | Protein Description                                                                |
|-----------------|--------------|--------------|--------------|--------------|--------------|--------------|--------------|--------------|---------------|---------------|---------------|--------------|-----------|------------------------------------------------------------------------------------|
| 1 d<br>M1/C1    | 1 d<br>M2/C2 | 1 d<br>M3/C3 | 4 d<br>M1/C1 | 4 d<br>M2/C2 | 4 d<br>M3/C3 | 7 d<br>M1/C1 | 7 d<br>M2/C2 | 7 d<br>M3/C3 | 10 d<br>M1/C1 | 10 d<br>M2/C2 | 10 d<br>M3/C3 |              |           |                                                                                    |
| 0.991           | 1.035        | 1.034        | 1.082        | 1.386        | 1.000        | 1.063        | 1.094        | 1.124        | 1.077         | 1.074         | 1.075         | Q13907-2     | IDI1      | Isoform 2 of Isopentenyl-diphosphate Delta-isomerase 1                             |
| 1.074           | 0.965        | 0.988        | 1.047        | 0.973        | 1.009        | 1.090        | 0.982        | 0.996        | 1.084         | 1.010         | 1.044         | P53990-2     | IST1      | Isoform 2 of IST1 homolog                                                          |
|                 |              |              | 0.931        | 0.872        | 0.941        | 0.862        | 1.075        | 0.996        |               |               |               | Q96N16-2     | JAKMIP1   | Isoform 2 of Janus kinase and microtubule-interacting protein 1                    |
| 0.946           | 1.009        | 0.992        | 0.997        | 0.980        | 1.002        | 0.983        | 1.033        | 1.015        | 0.981         | 1.066         | 0.962         | P05787-2     | KRT8      | Isoform 2 of Keratin, type II cytoskeletal 8                                       |
| 1.005           | 0.969        | 0.937        | 0.996        | 0.933        | 0.971        | 1.050        | 1.211        | 1.112        | 0.987         | 1.214         | 0.935         | Q8N6L1-2     | KRTCAP2   | Isoform 2 of Keratinocyte-associated protein 2                                     |
| 0.991           | 1.012        | 1.028        | 1.032        | 0.929        | 1.003        | 1.044        | 1.075        | 1.044        | 1.065         | 1.029         | 1.100         | Q96J84-2     | KIRREL    | Isoform 2 of Kin of IRRE-like protein 1                                            |
| 1.002           | 1.005        | 1.018        | 0.990        | 0.978        | 1.051        | 1.034        | 0.985        | 1.009        | 1.030         | 0.973         | 1.044         | O60333-2     | KIF1B     | Isoform 2 of Kinesin-like protein KIF1B                                            |
| 0.871           | 1.121        | 1.171        |              |              |              |              |              |              |               |               |               | Q96Q89-2     | KIF20B    | Isoform 2 of Kinesin-like protein KIF20B                                           |
| 1.027           | 1.068        | 1.082        | 1.121        | 1.034        | 1.083        | 1.030        | 1.041        | 1.053        | 1.007         | 1.021         | 1.114         | Q02241-2     | KIF23     | Isoform 2 of Kinesin-like protein KIF23                                            |
| 1.004           | 1.025        | 1.032        | 1.038        | 1.006        | 1.015        | 1.046        | 1.038        | 0.999        | 1.060         | 1.001         | 1.033         | O00139-2     | KIF2A     | Isoform 2 of Kinesin-like protein KIF2A                                            |
| 1.037           | 0.999        | 1.017        | 0.918        | 1.017        | 0.868        | 0.986        | 1.054        | 1.176        |               |               |               | Q8N5Z0-2     | AADAT     | Isoform 2 of Kynurenine/alpha-aminoadipate aminotransferase, mitochondrial         |
|                 |              |              | 1.258        | 0.846        | 0.904        | 1.012        | 1.338        | 0.948        | 1.141         | 0.907         | 1.331         | Q96RQ9-2     | IL4I1     | Isoform 2 of L-amino-acid oxidase                                                  |
| 1.014           | 0.971        | 1.011        | 0.989        | 0.925        | 1.021        | 1.032        | 1.038        | 1.042        | 1.032         | 1.008         | 1.069         | Q9UIC8-2     | LCMT1     | Isoform 2 of Leucine carboxyl methyltransferase 1                                  |
| 1.004           | 0.933        | 1.063        | 0.958        | 1.003        | 1.062        | 1.009        | 0.973        | 1.025        | 0.961         | 0.959         | 0.976         | Q9Y2L9-2     | LRCH1     | Isoform 2 of Leucine-rich repeat and calponin homology domain-containing protein 1 |
| 1.061           | 1.016        | 1.043        | 0.995        | 0.976        | 1.059        | 0.908        | 0.974        | 1.017        | 0.950         | 1.037         | 1.010         | Q96PV6-2     | LENG8     | Isoform 2 of Leukocyte receptor cluster member 8                                   |
| 1.042           | 1.050        | 1.082        | 1.024        | 0.933        | 1.066        | 0.925        | 1.126        | 1.077        | 1.080         | 0.970         | 1.076         | Q8N0W3-2     | FUK       | Isoform 2 of L-fucose kinase                                                       |
| 1.012           | 1.016        | 1.028        | 1.001        | 0.931        | 0.982        | 1.023        | 1.008        | 1.005        | 1.015         | 1.006         | 1.000         | P50851-2     | LRBA      | Isoform 2 of Lipopolysaccharide-responsive and beige-like anchor protein           |
|                 |              |              | 0.954        | 0.900        | 0.868        |              |              |              |               |               |               | Q86W92-2     | PPFIBP1   | Isoform 2 of Liprin-beta-1                                                         |
| 1.011           | 0.978        | 1.028        | 1.014        | 0.971        | 1.017        | 0.981        | 1.049        | 0.975        | 1.023         | 0.974         | 1.034         | Q9P260-2     | KIAA1468  | Isoform 2 of LisH domain and HEAT repeat-containing protein KIAA1468               |
| 0.988           | 1.009        | 1.034        | 1.025        | 0.970        | 1.001        | 0.892        | 0.858        | 0.947        | 1.165         | 1.128         | 1.020         | P24666-2     | ACP1      | Isoform 2 of Low molecular weight phosphotyrosine protein phosphatase              |
| 0.991           | 0.966        | 0.999        | 1.049        | 1.092        | 0.992        | 1.031        | 1.098        | 1.095        | 0.822         | 0.901         | 1.149         | Q96KB5-2     | PBK       | Isoform 2 of Lymphokine-activated killer T-cell-originated protein kinase          |
| 1.000           | 1.051        | 1.653        | 1.064        | 0.997        | 1.184        | 1.064        | 0.907        | 1.169        | 1.118         | 1.145         | 1.081         | Q92633-2     | LPAR1     | Isoform 2 of Lysophosphatidic acid receptor 1                                      |
| 0.971           | 1.056        | 1.129        | 1.038        | 0.935        | 1.073        | 0.903        | 1.138        | 1.028        | 0.935         | 1.020         | 1.001         | Q15013-3     | MAD2L1BP  | Isoform 2 of MAD2L1-binding protein                                                |
| 1.013           | 1.005        | 1.014        | 0.989        | 1.003        | 0.980        | 1.022        | 0.998        | 1.016        | 1.007         | 0.980         | 1.018         | Q96IJ6-2     | GMPPA     | Isoform 2 of Mannose-1-phosphate guanylttransferase alpha                          |
| 1.101           | 1.032        | 1.062        | 1.012        | 1.039        | 0.983        | 1.000        | 1.017        | 1.019        | 0.991         | 0.957         | 1.017         | Q9Y5P6-2     | GMPPB     | Isoform 2 of Mannose-1-phosphate guanylttransferase beta                           |
| 1.144           | 0.972        | 1.046        | 1.019        | 0.975        | 1.002        | 1.018        | 0.986        | 1.002        | 0.980         | 1.002         | 1.074         | Q8WXG6-2     | MADD      | Isoform 2 of MAP kinase-activating death domain protein                            |

| Abundance Ratio |              |              |              |              |              |              |              |              |               |               |               | Accession ID | Gene name | Protein Description                                                           |
|-----------------|--------------|--------------|--------------|--------------|--------------|--------------|--------------|--------------|---------------|---------------|---------------|--------------|-----------|-------------------------------------------------------------------------------|
| 1 d<br>M1/C1    | 1 d<br>M2/C2 | 1 d<br>M3/C3 | 4 d<br>M1/C1 | 4 d<br>M2/C2 | 4 d<br>M3/C3 | 7 d<br>M1/C1 | 7 d<br>M2/C2 | 7 d<br>M3/C3 | 10 d<br>M1/C1 | 10 d<br>M2/C2 | 10 d<br>M3/C3 |              |           |                                                                               |
|                 |              |              | 1.020        | 0.787        | 0.983        |              |              |              |               |               |               | Q13495-3     | MAMLD1    | Isoform 2 of Mastermind-like domain-containing protein 1                      |
| 0.941           | 0.944        | 1.026        | 0.934        | 0.898        | 1.036        | 1.030        | 0.946        | 0.978        | 1.130         | 1.049         | 1.156         | P84157-2     | MXRA7     | Isoform 2 of Matrix-remodeling-associated protein 7                           |
| 1.002           | 0.985        | 1.028        | 0.983        | 0.946        | 1.031        | 0.993        | 1.131        | 1.053        | 0.990         | 0.980         | 1.026         | Q93074-2     | MED12     | Isoform 2 of Mediator of RNA polymerase II transcription subunit 12           |
| 1.057           | 0.993        | 1.009        | 1.039        | 0.939        | 1.072        | 1.014        | 1.074        | 0.972        | 1.030         | 0.970         | 1.028         | Q96G25-2     | MED8      | Isoform 2 of Mediator of RNA polymerase II transcription subunit 8            |
| 1.040           | 0.989        | 1.027        | 0.994        | 0.974        | 0.978        | 1.039        | 0.977        | 0.941        | 1.006         | 0.965         | 1.080         | Q9Y5V3-2     | MAGED1    | Isoform 2 of Melanoma-associated antigen D1                                   |
| 1.035           | 1.009        | 0.928        | 1.012        | 0.611        | 1.324        | 1.033        | 1.135        | 1.013        | 1.103         | 0.948         | 1.096         | Q8N565-2     | MREG      | Isoform 2 of Melanoregulin                                                    |
| 1.056           | 0.971        | 1.002        | 1.029        | 1.043        | 0.990        | 1.078        | 1.011        | 1.041        | 1.093         | 0.985         | 0.955         | O15173-2     | PGRMC2    | Isoform 2 of Membrane-associated progesterone receptor component 2            |
| 1.008           | 0.950        | 1.051        | 0.949        | 0.903        | 1.037        | 1.029        | 1.049        | 1.032        | 1.003         | 0.968         | 1.044         | Q8N108-12    | MIER1     | Isoform 2 of Mesoderm induction early response protein 1                      |
|                 |              |              | 0.888        | 0.868        | 1.067        | 0.953        | 1.267        | 1.124        |               |               |               | Q7Z3K6-2     | MIER3     | Isoform 2 of Mesoderm induction early response protein 3                      |
| 0.996           | 0.970        | 0.940        | 1.004        | 0.934        | 1.087        | 1.078        | 1.112        | 1.026        | 1.004         | 1.041         | 1.097         | Q658P3-2     | STEAP3    | Isoform 2 of Metalloreductase STEAP3                                          |
| 1.020           | 1.044        | 0.989        | 1.046        | 0.888        | 0.950        | 1.028        | 0.990        | 0.967        | 1.024         | 1.102         | 0.970         | Q8IXL7-2     | MSRB3     | Isoform 2 of Methionine-R-sulfoxide reductase B3                              |
| 1.055           | 1.025        | 1.102        | 1.080        | 0.854        | 0.974        | 1.014        | 0.951        | 1.077        | 0.991         | 1.179         | 1.061         | P42898-2     | MTHFR     | Isoform 2 of Methylene tetrahydrofolate reductase                             |
| 0.980           | 0.991        | 0.994        | 0.972        | 0.961        | 0.988        | 0.974        | 0.944        | 0.969        | 1.021         | 1.007         | 1.013         | Q16891-2     | IMMT      | Isoform 2 of MICOS complex subunit MIC60                                      |
| 1.018           | 1.035        | 1.025        | 1.022        | 1.039        | 1.037        | 1.215        | 1.026        | 0.973        | 1.077         | 1.072         | 1.070         | Q96EZ8-2     | MCRS1     | Isoform 2 of Microspherule protein 1                                          |
| 0.862           | 0.969        | 0.997        | 1.005        | 1.057        | 1.121        | 1.103        | 1.130        | 1.067        | 1.037         | 1.142         | 0.938         | Q9H492-2     | MAP1LC3A  | Isoform 2 of Microtubule-associated proteins 1A/1B light chain 3A             |
|                 |              |              | 0.998        | 0.800        | 1.066        | 0.979        | 0.901        | 0.894        |               |               |               | Q5VT66-2     |           | 1-Mar<br>Isoform 2 of Mitochondrial amidoxime-reducing component 1            |
| 0.938           | 1.006        | 0.985        | 0.990        | 0.931        | 0.998        | 1.007        | 1.020        | 0.989        | 0.992         | 0.995         | 0.989         | Q9UBX3-2     | SLC25A10  | Isoform 2 of Mitochondrial dicarboxylate carrier                              |
| 1.052           | 0.977        | 0.992        | 1.028        | 0.948        | 0.982        | 0.997        | 1.040        | 1.033        | 1.005         | 1.039         | 0.986         | Q9GZY8-2     | MFF       | Isoform 2 of Mitochondrial fission factor                                     |
| 0.983           | 1.006        | 1.013        | 0.999        | 1.046        | 1.039        | 1.084        | 1.054        | 1.080        | 1.099         | 1.009         | 1.156         | Q3ZCQ8-2     | TIMM50    | Isoform 2 of Mitochondrial import inner membrane translocase subunit TIM50    |
| 1.105           | 0.973        | 0.973        | 1.042        | 0.927        | 0.881        | 1.036        | 0.990        | 0.922        | 1.043         | 1.003         | 1.024         | Q8N4Q1-2     | CHCHD4    | Isoform 2 of Mitochondrial intermembrane space import and assembly protein 40 |
| 0.960           | 0.973        | 0.986        | 0.936        | 0.956        | 0.984        | 1.074        | 1.189        | 0.971        | 0.935         | 0.981         | 1.042         | Q9NYL2-2     | MAP3K20   | Isoform 2 of Mitogen-activated protein kinase kinase kinase 20                |
| 0.978           | 0.989        | 0.967        | 0.983        | 0.950        | 0.974        | 0.993        | 1.010        | 1.002        | 0.959         | 0.986         | 0.960         | Q7L9L4-2     | MOB1B     | Isoform 2 of MOB kinase activator 1B                                          |
| 0.887           | 0.867        | 1.170        | 0.964        | 1.022        | 1.197        | 0.839        | 0.992        | 1.073        | 1.032         | 1.070         | 0.822         | Q6N075-2     | MFSD5     | Isoform 2 of Molybdate-anion transporter                                      |
| 0.957           | 1.037        | 0.988        | 0.951        | 0.937        | 1.029        | 0.997        | 1.042        | 1.014        | 1.021         | 0.997         | 1.051         | Q8N2K0-2     | ABHD12    | Isoform 2 of Monoacylglycerol lipase ABHD12                                   |

| Abundance Ratio |              |              |              |              |              |              |              |              |               |               |               | Accession ID | Gene name | Protein Description                                                                      |
|-----------------|--------------|--------------|--------------|--------------|--------------|--------------|--------------|--------------|---------------|---------------|---------------|--------------|-----------|------------------------------------------------------------------------------------------|
| 1 d<br>M1/C1    | 1 d<br>M2/C2 | 1 d<br>M3/C3 | 4 d<br>M1/C1 | 4 d<br>M2/C2 | 4 d<br>M3/C3 | 7 d<br>M1/C1 | 7 d<br>M2/C2 | 7 d<br>M3/C3 | 10 d<br>M1/C1 | 10 d<br>M2/C2 | 10 d<br>M3/C3 |              |           |                                                                                          |
| 1.013           | 0.996        | 0.988        | 0.979        | 0.972        | 0.997        | 1.009        | 1.053        | 0.995        | 0.987         | 0.974         | 1.006         | O43148-2     | RNMT      | Isoform 2 of mRNA cap guanine-N7 methyltransferase                                       |
| 1.078           | 1.167        | 0.971        | 1.091        | 0.987        | 0.971        |              |              |              |               |               |               | P15941-2     | MUC1      | Isoform 2 of Mucin-1                                                                     |
| 0.987           | 1.006        | 1.023        | 0.983        | 0.969        | 1.052        | 0.997        | 1.060        | 1.002        | 0.968         | 1.033         | 0.957         | Q9BQG0-2     | MYBBP1A   | Isoform 2 of Myb-binding protein 1A                                                      |
| 1.086           | 0.947        | 1.045        | 1.015        | 1.166        | 1.235        | 1.152        | 0.834        | 1.046        | 1.045         | 0.999         | 1.015         | P56270-2     | MAZ       | Isoform 2 of Myc-associated zinc finger protein                                          |
| 0.987           | 0.987        | 0.990        | 1.002        | 0.969        | 1.000        | 0.990        | 1.000        | 0.996        | 1.013         | 1.009         | 1.042         | Q6WCQ1-2     | MPRIP     | Isoform 2 of Myosin phosphatase Rho-interacting protein                                  |
| 1.585           | 1.040        | 1.196        |              |              |              | 0.542        | 0.882        | 0.936        | 0.836         | 0.947         | 0.915         | P35749-2     | MYH11     | Isoform 2 of Myosin-11                                                                   |
| 1.083           | 0.960        | 0.996        | 0.960        | 0.868        | 1.025        | 1.064        | 0.985        | 1.038        | 1.202         | 1.130         | 1.431         | Q7Z406-2     | MYH14     | Isoform 2 of Myosin-14                                                                   |
|                 |              |              |              |              |              | 0.896        | 0.966        | 1.067        |               |               |               | P35579-2     | MYH9      | Isoform 2 of Myosin-9                                                                    |
| 0.961           | 0.974        | 0.991        | 1.000        | 0.973        | 1.011        | 1.004        | 1.031        | 1.031        | 1.003         | 0.958         | 0.996         | Q9UJ70-2     | NAGK      | Isoform 2 of N-acetyl-D-glucosamine kinase                                               |
| 1.028           | 0.931        | 0.942        | 1.128        | 0.851        | 1.092        |              |              |              | 1.048         | 0.968         | 1.053         | Q93015-2     | NAT6      | Isoform 2 of N-acetyltransferase 6                                                       |
| 1.003           | 0.798        | 1.028        | 0.962        | 0.873        | 0.979        | 1.071        | 1.075        | 1.019        | 1.011         | 0.971         | 1.116         | O95544-2     | NADK      | Isoform 2 of NAD kinase                                                                  |
| 1.006           | 1.019        | 1.008        | 0.947        | 0.932        | 0.960        | 1.021        | 1.079        | 1.034        | 1.023         | 1.005         | 0.987         | Q86Y39-2     | NDUFA11   | Isoform 2 of NADH dehydrogenase [ubiquinone] 1 alpha subcomplex subunit 11               |
| 1.005           | 0.985        | 0.987        | 1.028        | 0.956        | 1.046        | 0.989        | 1.048        | 1.036        | 1.038         | 0.986         | 1.031         | Q9P0J0-2     | NDUFA13   | Isoform 2 of NADH dehydrogenase [ubiquinone] 1 alpha subcomplex subunit 13               |
| 0.948           | 0.970        | 0.977        | 0.953        | 0.882        | 0.948        | 1.024        | 1.009        | 0.946        | 1.154         | 0.982         | 1.128         | Q9NX14-2     | NDUFB11   | Isoform 2 of NADH dehydrogenase [ubiquinone] 1 beta subcomplex subunit 11, mitochondrial |
| 1.029           | 1.010        | 1.004        | 0.987        | 0.971        | 1.023        | 1.021        | 0.994        | 0.990        | 1.061         | 1.001         | 1.050         | P56181-2     | NDUFV3    | Isoform 2 of NADH dehydrogenase [ubiquinone] flavoprotein 3, mitochondrial               |
| 0.997           | 1.011        | 1.011        | 1.006        | 1.008        | 0.988        | 1.001        | 1.021        | 1.013        | 1.018         | 1.003         | 1.011         | P28331-2     | NDUFS1    | Isoform 2 of NADH-ubiquinone oxidoreductase 75 kDa subunit, mitochondrial                |
| 1.425           | 1.514        | 0.936        | 0.603        | 0.979        | 1.278        | 1.218        | 1.691        | 0.904        | 0.978         | 1.125         | 1.082         | Q9UHB4-2     | NDOR1     | Isoform 2 of NADPH-dependent diflavin oxidoreductase 1                                   |
| 1.105           | 1.007        | 1.110        | 1.044        | 0.936        | 0.993        | 1.015        | 1.053        | 1.041        | 0.945         | 0.986         | 0.918         | Q9BRA0-2     | NAA38     | Isoform 2 of N-alpha-acetyltransferase 38, NatC auxiliary subunit                        |
| 1.016           | 1.007        | 1.001        | 1.001        | 0.976        | 1.019        | 0.978        | 1.004        | 0.996        | 0.958         | 1.004         | 0.948         | Q9Y2A7-2     | NCKAP1    | Isoform 2 of Nck-associated protein 1                                                    |
|                 |              |              | 0.847        | 0.912        | 0.919        | 0.995        | 1.027        | 0.902        | 1.137         | 1.038         | 1.162         | O76041-2     | NEBL      | Isoform 2 of Nebulette                                                                   |
| 0.968           | 1.102        | 1.069        | 1.057        | 0.683        | 1.006        | 0.914        | 0.648        | 0.970        | 1.237         | 0.946         | 1.268         | Q969M7-2     | UBE2F     | Isoform 2 of NEDD8-conjugating enzyme UBE2F                                              |
| 0.961           | 0.964        | 0.997        | 0.968        | 0.934        | 0.992        | 1.011        | 1.001        | 0.994        | 1.066         | 1.003         | 1.065         | Q8WXH0-2     | SYNE2     | Isoform 2 of Nesprin-2                                                                   |
| 0.982           | 1.010        | 1.007        | 1.192        | 1.138        | 1.154        | 1.146        | 1.152        | 1.063        | 1.100         | 1.113         | 1.137         | P32004-2     | L1CAM     | Isoform 2 of Neural cell adhesion molecule L1                                            |
|                 |              |              |              |              |              |              |              |              | 0.679         | 1.057         | 0.830         | P08949-2     | NMB       | Isoform 2 of Neuromedin-B                                                                |
| 0.989           | 1.025        | 1.025        | 1.034        | 1.020        | 0.990        | 1.037        | 1.048        | 1.032        | 1.024         | 0.933         | 1.066         | Q14697-2     | GANAB     | Isoform 2 of Neutral alpha-glucosidase AB                                                |
| 1.011           | 0.964        | 1.022        | 0.984        | 0.947        | 1.054        | 0.990        | 0.927        | 1.001        | 1.039         | 1.039         | 1.115         | Q9Y6K9-2     | IKBKG     | Isoform 2 of NF-kappa-B essential modulator                                              |
| 0.960           | 0.992        | 0.985        | 1.004        | 0.995        | 1.015        | 1.015        | 0.998        | 0.989        | 1.087         | 1.011         | 1.061         | O15226-2     | NKRF      | Isoform 2 of NF-kappa-B-repressing factor                                                |
|                 |              |              |              |              |              | 0.891        | 1.099        | 1.190        | 0.889         | 1.025         | 0.933         | Q8NBF2-2     | NHLRC2    | Isoform 2 of NHL repeat-containing protein 2                                             |



| Abundance Ratio |              |              |              |              |              |              |              |              |               |               |               | Accession ID | Gene name | Protein Description                                                |
|-----------------|--------------|--------------|--------------|--------------|--------------|--------------|--------------|--------------|---------------|---------------|---------------|--------------|-----------|--------------------------------------------------------------------|
| 1 d<br>M1/C1    | 1 d<br>M2/C2 | 1 d<br>M3/C3 | 4 d<br>M1/C1 | 4 d<br>M2/C2 | 4 d<br>M3/C3 | 7 d<br>M1/C1 | 7 d<br>M2/C2 | 7 d<br>M3/C3 | 10 d<br>M1/C1 | 10 d<br>M2/C2 | 10 d<br>M3/C3 |              |           |                                                                    |
| 1.482           | 1.024        | 1.232        |              |              |              |              |              |              |               |               |               | Q9UNZ2-4     | NSFL1C    | Isoform 2 of NSFL1 cofactor p47                                    |
|                 |              |              | 0.928        | 0.919        | 1.098        | 1.005        | 0.902        | 0.951        | 1.128         | 0.904         | 0.940         | Q9GZM8-2     | NDEL1     | Isoform 2 of Nuclear distribution protein nudE-like 1              |
| 1.072           | 0.951        | 1.033        | 1.029        | 0.942        | 1.055        | 0.946        | 1.031        | 1.004        | 1.045         | 1.003         | 1.051         | P19838-2     | NFKB1     | Isoform 2 of Nuclear factor NF-kappa-B p105 subunit                |
| 0.977           | 1.045        | 0.947        | 0.979        | 0.981        | 1.012        | 1.095        | 1.080        | 1.064        | 1.102         | 1.180         | 1.145         | Q6P4R8-2     | NFRKB     | Isoform 2 of Nuclear factor related to kappa-B-binding protein     |
| 0.976           | 0.991        | 1.008        | 1.016        | 0.918        | 1.029        | 1.040        | 1.085        | 0.945        | 1.043         | 0.905         | 1.081         | Q14980-2     | NUMA1     | Isoform 2 of Nuclear mitotic apparatus protein 1                   |
|                 |              |              | 0.814        | 0.867        | 0.860        | 0.957        | 0.610        | 0.672        |               |               |               | O60356-2     | NUPR1     | Isoform 2 of Nuclear protein 1                                     |
| 0.974           | 0.998        | 1.002        | 1.007        | 1.029        | 1.001        | 1.017        | 1.007        | 1.026        | 1.041         | 1.041         | 1.044         | Q8TAT6-2     | NPLOC4    | Isoform 2 of Nuclear protein localization protein 4 homolog        |
| 1.046           | 0.977        | 1.070        | 0.993        | 0.985        | 1.047        | 1.081        | 1.056        | 1.034        | 0.984         | 0.938         | 1.045         | Q86WQ0-2     | NR2C2AP   | Isoform 2 of Nuclear receptor 2C2-associated protein               |
| 1.022           | 1.043        | 1.006        | 1.009        | 0.969        | 1.047        | 1.022        | 1.016        | 1.052        | 1.063         | 0.968         | 1.051         | Q8NI08-2     | NCOA7     | Isoform 2 of Nuclear receptor coactivator 7                        |
| 1.049           | 1.004        | 1.084        | 1.016        | 0.998        | 1.017        | 1.001        | 1.078        | 0.987        | 0.920         | 0.899         | 1.045         | P49116-2     | NR2C2     | Isoform 2 of Nuclear receptor subfamily 2 group C member 2         |
| 1.018           | 1.020        | 0.982        | 0.996        | 1.016        | 0.952        | 0.999        | 1.105        | 1.060        | 0.987         | 1.004         | 0.970         | Q01085-2     | TIAL1     | Isoform 2 of Nucleolysin TIAR                                      |
| 0.879           | 0.940        | 0.979        | 0.951        | 0.965        | 1.091        | 0.727        | 0.613        | 0.950        | 0.975         | 0.974         | 0.857         | P06748-2     | NPM1      | Isoform 2 of Nucleophosmin                                         |
| 1.033           | 1.003        | 1.118        | 0.972        | 0.992        | 1.019        | 0.964        | 0.972        | 0.869        | 0.945         | 0.971         | 1.006         | P15531-2     | NME1      | Isoform 2 of Nucleoside diphosphate kinase A                       |
| 1.022           | 0.992        | 1.008        | 0.999        | 0.973        | 0.968        | 0.966        | 0.961        | 0.997        | 0.975         | 0.965         | 0.987         | Q99733-2     | NAP1L4    | Isoform 2 of Nucleosome assembly protein 1-like 4                  |
| 0.843           | 1.019        | 0.981        | 1.117        | 1.148        | 1.141        | 1.165        | 1.003        | 1.133        | 1.070         | 1.053         | 1.104         | Q9NRP0-2     | OSTC      | Isoform 2 of Oligosaccharyltransferase complex subunit OSTC        |
|                 |              |              | 0.811        | 1.439        | 0.988        |              |              |              | 0.979         | 1.095         | 1.091         | Q96CV9-2     | OPTN      | Isoform 2 of Optineurin                                            |
| 1.016           | 0.918        | 1.049        | 0.913        | 0.850        | 1.008        |              |              |              |               |               |               | Q9UBD5-2     | ORC3      | Isoform 2 of Origin recognition complex subunit 3                  |
| 0.994           | 0.988        | 1.009        |              |              |              | 1.126        | 1.074        | 1.076        |               |               |               | Q8N573-2     | OXR1      | Isoform 2 of Oxidation resistance protein 1                        |
| 1.106           | 1.014        | 0.896        | 1.032        | 0.955        | 0.968        | 1.052        | 0.946        | 1.004        | 1.100         | 0.989         | 1.062         | Q99571-2     | P2RX4     | Isoform 2 of P2X purinoceptor 4                                    |
| 0.995           | 1.003        | 1.045        | 0.991        | 0.964        | 0.991        | 1.030        | 1.061        | 1.054        | 1.011         | 1.089         | 1.078         | O75182-2     | SIN3B     | Isoform 2 of Paired amphipathic helix protein Sin3b                |
| 0.924           | 0.937        | 0.965        | 0.958        | 0.889        | 1.013        | 0.938        | 0.910        | 0.981        | 1.018         | 0.928         | 0.997         | Q02962-2     | PAX2      | Isoform 2 of Paired box protein Pax-2                              |
|                 |              |              |              |              |              | 1.701        | 1.234        | 0.665        | 1.032         | 0.966         | 1.043         | Q9NXF8-2     | ZDHHC7    | Isoform 2 of Palmitoyltransferase ZDHHC7                           |
| 1.059           | 0.927        | 1.007        | 0.978        | 0.946        | 1.037        | 0.961        | 0.988        | 1.013        | 1.048         | 0.988         | 1.040         | Q8NB37-2     | PDDC1     | Isoform 2 of Parkinson disease 7 domain-containing protein 1       |
| 0.986           | 1.020        | 1.013        | 1.125        | 0.932        | 1.080        | 0.890        | 1.112        | 1.028        | 0.962         | 0.990         | 0.947         | Q96RG2-2     | PASK      | Isoform 2 of PAS domain-containing serine/threonine-protein kinase |
| 1.014           | 1.000        | 1.012        | 0.964        | 0.991        | 0.970        | 0.968        | 1.047        | 0.955        | 1.029         | 1.065         | 1.033         | Q5EBL8-2     | PDZD11    | Isoform 2 of PDZ domain-containing protein 11                      |

| Abundance Ratio |              |              |              |              |              |              |              |              |               |               |               | Accession ID | Gene name | Protein Description                                                         |
|-----------------|--------------|--------------|--------------|--------------|--------------|--------------|--------------|--------------|---------------|---------------|---------------|--------------|-----------|-----------------------------------------------------------------------------|
| 1 d<br>M1/C1    | 1 d<br>M2/C2 | 1 d<br>M3/C3 | 4 d<br>M1/C1 | 4 d<br>M2/C2 | 4 d<br>M3/C3 | 7 d<br>M1/C1 | 7 d<br>M2/C2 | 7 d<br>M3/C3 | 10 d<br>M1/C1 | 10 d<br>M2/C2 | 10 d<br>M3/C3 |              |           |                                                                             |
| 0.996           | 1.030        | 1.012        | 0.941        | 0.923        | 0.930        | 0.952        | 0.874        | 0.957        | 1.005         | 0.956         | 1.067         | Q9Y680-2     | FKBP7     | Isoform 2 of Peptidyl-prolyl cis-trans isomerase FKBP7                      |
| 0.969           | 0.993        | 1.034        | 1.022        | 1.107        | 1.035        | 1.073        | 1.020        | 1.084        | 1.039         | 1.092         | 1.072         | Q14318-2     | FKBP8     | Isoform 2 of Peptidyl-prolyl cis-trans isomerase FKBP8                      |
| 1.038           | 1.065        | 0.967        | 1.038        | 1.108        | 1.028        | 1.020        | 0.961        | 1.024        | 1.090         | 1.085         | 1.009         | Q9Y237-2     | PIN4      | Isoform 2 of Peptidyl-prolyl cis-trans isomerase NIMA-interacting 4         |
| 1.031           | 0.997        | 0.998        | 0.975        | 0.955        | 0.987        | 1.019        | 1.080        | 0.992        | 1.039         | 1.070         | 1.066         | Q9Y5Y5-2     | PEX16     | Isoform 2 of Peroxisomal membrane protein PEX16                             |
| 0.986           | 1.015        | 1.025        | 0.975        | 0.916        | 1.012        | 0.970        | 1.020        | 0.965        | 0.978         | 1.000         | 1.068         | Q8IZ21-2     | PHACTR4   | Isoform 2 of Phosphatase and actin regulator 4                              |
| 0.950           | 0.953        | 1.082        | 0.977        | 0.894        | 0.981        | 1.060        | 1.075        | 1.044        | 0.991         | 0.987         | 0.995         | Q9BQK8-2     | LPIN3     | Isoform 2 of Phosphatidate phosphatase LPIN3                                |
| 0.984           | 1.035        | 1.044        | 0.898        | 0.803        | 0.956        | 1.106        | 1.124        | 1.061        | 1.111         | 1.094         | 1.176         | Q9BRB3-2     | PIGQ      | Isoform 2 of Phosphatidylinositol N-acetylglucosaminyltransferase subunit Q |
| 1.181           | 1.077        | 1.101        | 1.014        | 1.017        | 1.030        | 0.965        | 1.097        | 1.040        | 0.889         | 1.076         | 1.060         | Q86VP3-2     | PACS2     | Isoform 2 of Phosphofurin acidic cluster sorting protein 2                  |
| 1.151           | 1.515        | 1.486        | 1.224        | 0.890        | 1.501        |              |              |              | 0.979         | 1.047         | 1.111         | O43688-2     | PLPP2     | Isoform 2 of Phospholipid phosphatase 2                                     |
| 0.933           | 0.985        | 1.414        | 0.969        | 0.957        | 1.282        | 0.644        | 1.279        | 1.012        | 0.893         | 1.072         | 1.025         | O14523-2     | C2CD2L    | Isoform 2 of Phospholipid transfer protein C2CD2L                           |
| 1.015           | 1.012        | 0.998        | 0.993        | 0.939        | 0.996        | 0.997        | 1.077        | 0.982        | 0.970         | 0.992         | 0.970         | Q14558-2     | PRPSAP1   | Isoform 2 of Phosphoribosyl pyrophosphate synthase-associated protein 1     |
| 1.000           | 0.983        | 1.023        | 0.956        | 0.962        | 0.983        | 1.010        | 0.912        | 0.975        | 1.054         | 1.025         | 1.078         | Q86UU1-2     | PHLDB1    | Isoform 2 of Pleckstrin homology-like domain family B member 1              |
| 0.984           | 0.997        | 0.965        | 0.988        | 0.989        | 0.998        | 1.007        | 1.029        | 1.011        | 0.970         | 1.037         | 1.014         | Q9UHX1-2     | PUF60     | Isoform 2 of Poly(U)-binding-splicing factor PUF60                          |
| 1.008           | 0.999        | 0.984        | 1.005        | 0.977        | 1.027        | 1.038        | 1.095        | 1.003        | 0.951         | 0.952         | 1.010         | O75530-2     | EED       | Isoform 2 of Polycomb protein EED                                           |
| 0.987           | 0.956        | 1.032        | 0.977        | 0.918        | 1.045        | 1.000        | 1.087        | 0.965        | 0.992         | 0.959         | 1.038         | Q9ULR0-1     | ISY1      | Isoform 2 of Pre-mRNA-splicing factor ISY1 homolog                          |
| 0.936           | 0.977        | 1.004        | 0.932        | 0.922        | 0.962        | 0.915        | 0.856        | 0.937        | 0.986         | 0.929         | 0.996         | Q5JRX3-2     | PITRM1    | Isoform 2 of Presequence protease, mitochondrial                            |
| 0.831           | 0.755        | 1.117        | 0.776        | 1.184        | 1.089        | 0.762        | 0.445        | 0.977        | 0.928         | 1.127         | 1.107         | P46087-2     | NOP2      | Isoform 2 of Probable 28S rRNA (cytosine(4447)-C(5))-methyltransferase      |
| 1.027           | 1.009        | 1.044        | 1.026        | 0.981        | 1.030        | 1.032        | 1.093        | 1.044        | 1.012         | 1.038         | 1.014         | Q96P11-2     | NSUN5     | Isoform 2 of Probable 28S rRNA (cytosine-C(5))-methyltransferase            |
|                 |              |              | 0.922        | 1.970        | 1.148        |              |              |              |               |               |               | Q5T6J7-2     | IDNK      | Isoform 2 of Probable gluconokinase                                         |
| 0.989           | 1.001        | 1.043        | 0.959        | 0.979        | 0.975        | 0.977        | 0.891        | 0.990        | 1.039         | 0.990         | 1.031         | Q5JPH6-2     | EARS2     | Isoform 2 of Probable glutamate--tRNA ligase, mitochondrial                 |
| 1.067           | 1.020        | 0.999        | 1.040        | 1.382        | 1.054        | 1.125        | 0.848        | 1.131        | 1.133         | 1.018         | 1.251         | Q8N490-2     | PNKD      | Isoform 2 of Probable hydrolase PNKD                                        |
|                 |              |              |              |              |              | 1.149        | 1.220        | 0.940        |               |               |               | Q9C0D7-2     | ZC3H12C   | Isoform 2 of Probable ribonuclease ZC3H12C                                  |
| 1.006           | 1.017        | 1.006        | 0.992        | 0.956        | 1.005        | 0.993        | 1.023        | 0.994        | 0.987         | 0.987         | 1.009         | Q02809-2     | PLOD1     | Isoform 2 of Procollagen-lysine,2-oxoglutarate 5-dioxygenase 1              |

| Abundance Ratio |              |              |              |              |              |              |              |              |               |               |               | Accession ID | Gene name | Protein Description                                            |
|-----------------|--------------|--------------|--------------|--------------|--------------|--------------|--------------|--------------|---------------|---------------|---------------|--------------|-----------|----------------------------------------------------------------|
| 1 d<br>M1/C1    | 1 d<br>M2/C2 | 1 d<br>M3/C3 | 4 d<br>M1/C1 | 4 d<br>M2/C2 | 4 d<br>M3/C3 | 7 d<br>M1/C1 | 7 d<br>M2/C2 | 7 d<br>M3/C3 | 10 d<br>M1/C1 | 10 d<br>M2/C2 | 10 d<br>M3/C3 |              |           |                                                                |
| 1.010           | 1.031        | 1.069        | 0.997        | 0.974        | 1.030        | 0.969        | 1.072        | 1.004        | 0.956         | 0.960         | 0.962         | O00469-2     | PLOD2     | Isoform 2 of Procollagen-lysine,2-oxoglutarate 5-dioxygenase 2 |
|                 |              |              | 1.154        | 0.990        | 1.194        | 0.925        | 1.180        | 1.181        | 1.018         | 1.003         | 0.920         | Q8WUM4-2     | PDCD6IP   | Isoform 2 of Programmed cell death 6-interacting protein       |
| 0.940           | 1.013        | 0.960        | 1.003        | 0.972        | 1.013        | 0.972        | 1.059        | 1.023        | 0.987         | 0.989         | 0.986         | O75340-2     | PDCD6     | Isoform 2 of Programmed cell death protein 6                   |
| 1.061           | 1.002        | 1.017        | 0.953        | 1.013        | 0.994        | 0.935        | 0.964        | 0.941        | 0.910         | 0.965         | 0.939         | P13674-2     | P4HA1     | Isoform 2 of Prolyl 4-hydroxylase subunit alpha-1              |
| 0.927           | 0.997        | 1.091        | 0.972        | 0.854        | 1.009        | 1.013        | 0.927        | 0.926        | 1.009         | 0.859         | 1.113         | Q96B96-2     | TMEM159   | Isoform 2 of Promethin                                         |
| 1.013           | 0.995        | 1.017        | 0.976        | 0.985        | 1.043        | 1.023        | 1.078        | 1.038        | 0.980         | 0.955         | 1.069         | P61289-2     | PSME3     | Isoform 2 of Proteasome activator complex subunit 3            |
| 0.876           | 1.004        | 0.965        | 0.950        | 0.964        | 1.039        | 0.972        | 0.989        | 1.093        | 0.989         | 1.023         | 0.988         | Q5JS54-2     | PSMG4     | Isoform 2 of Proteasome assembly chaperone 4                   |
| 0.904           | 0.954        | 1.167        | 0.987        | 1.009        | 1.182        | 1.029        | 1.039        | 1.116        | 0.991         | 0.979         | 1.041         | Q5VST6-2     | ABHD17B   | Isoform 2 of Protein ABHD17B                                   |
| 0.977           | 0.969        | 1.010        | 1.000        | 0.956        | 1.053        | 1.028        | 0.976        | 1.020        | 1.044         | 0.986         | 1.075         | Q8TD16-2     | BICD2     | Isoform 2 of Protein bicaudal D homolog 2                      |
| 0.942           | 0.978        | 0.960        | 0.987        | 1.088        | 1.049        | 1.022        | 0.805        | 0.944        | 1.042         | 0.998         | 1.073         | Q8WUW1-2     | BRK1      | Isoform 2 of Protein BRICK1                                    |
| 1.256           | 0.897        | 1.029        | 0.937        | 0.954        | 1.089        | 1.056        | 1.094        | 1.007        | 1.072         | 1.050         | 1.111         | Q14201-2     | BTG3      | Isoform 2 of Protein BTG3                                      |
| 0.993           | 1.019        | 0.994        | 0.984        | 0.982        | 1.014        | 0.984        | 1.045        | 1.004        | 1.002         | 0.996         | 1.012         | Q15084-2     | PDIA6     | Isoform 2 of Protein disulfide-isomerase A6                    |
| 1.020           | 0.993        | 1.030        | 0.989        | 0.966        | 1.018        | 1.005        | 1.010        | 1.005        | 0.985         | 0.985         | 1.022         | Q8WYP5-2     | AHCTF1    | Isoform 2 of Protein ELYS                                      |
| 1.151           | 0.900        | 0.888        | 0.927        | 0.988        | 1.039        | 1.187        | 0.950        | 1.093        | 0.971         | 0.900         | 1.110         | Q9H098-2     | FAM107B   | Isoform 2 of Protein FAM107B                                   |
| 1.001           | 1.024        | 0.981        | 0.981        | 0.975        | 1.003        | 0.978        | 1.106        | 1.083        | 0.972         | 1.026         | 1.033         | Q8N128-2     | FAM177A1  | Isoform 2 of Protein FAM177A1                                  |
| 1.002           | 0.992        | 0.991        | 0.992        | 0.994        | 1.015        | 0.998        | 0.993        | 1.025        | 0.974         | 1.022         | 0.998         | Q52LJ0-2     | FAM98B    | Isoform 2 of Protein FAM98B                                    |
| 1.010           | 1.021        | 1.038        | 0.982        | 0.966        | 0.982        | 0.975        | 1.054        | 1.036        | 1.058         | 0.924         | 1.024         | Q5VW38-2     | GPR107    | Isoform 2 of Protein GPR107                                    |
| 0.961           | 0.876        | 1.004        | 0.964        | 1.029        | 1.060        | 0.981        | 1.060        | 1.005        | 1.025         | 0.928         | 0.971         | Q8IX03-2     | WWC1      | Isoform 2 of Protein KIBRA                                     |
| 0.951           | 0.917        | 1.004        | 0.904        | 1.042        | 1.042        | 0.913        | 0.832        | 0.991        | 0.987         | 0.998         | 1.000         | Q3MHD2-2     | LSM12     | Isoform 2 of Protein LSM12 homolog                             |
| 1.006           | 0.970        | 0.977        | 0.971        | 0.970        | 0.988        | 0.992        | 0.976        | 1.004        | 0.962         | 0.946         | 1.007         | Q8WZA0-2     | LZIC      | Isoform 2 of Protein LZIC                                      |
| 1.017           | 0.986        | 1.008        | 1.006        | 0.968        | 1.010        | 1.010        | 1.048        | 1.049        | 1.027         | 1.040         | 1.049         | Q96PU8-3     | QKI       | Isoform 2 of Protein quaking                                   |
| 1.192           | 0.889        | 1.201        | 0.976        | 0.971        | 1.092        | 0.888        | 1.104        | 0.957        | 1.083         | 1.103         | 1.087         | Q8N9R8-2     | SCAI      | Isoform 2 of Protein SCAI                                      |
| 0.996           | 1.017        | 1.048        | 0.933        | 1.009        | 1.052        | 1.081        | 0.811        | 1.002        | 1.109         | 0.961         | 1.210         | Q01105-2     | SET       | Isoform 2 of Protein SET                                       |
| 0.984           | 1.062        | 1.043        | 1.782        | 1.387        | 1.757        | 0.916        | 1.054        | 1.126        | 0.943         | 0.879         | 0.938         | Q9Y2Z0-2     | SUGT1     | Isoform 2 of Protein SGT1 homolog                              |
| 0.996           | 0.990        | 1.030        | 0.956        | 0.985        | 1.039        | 1.027        | 0.953        | 1.036        | 1.026         | 0.980         | 1.098         | Q8ND04-2     | SMG8      | Isoform 2 of Protein SMG8                                      |
| 1.052           | 0.958        | 1.023        | 1.119        | 1.009        | 1.188        | 0.969        | 0.994        | 1.009        | 1.293         | 1.268         | 1.445         | O94964-2     | SOGA1     | Isoform 2 of Protein SOGA1                                     |
| 1.008           | 0.952        | 1.050        | 1.232        | 1.122        | 1.121        | 1.072        | 1.010        | 0.878        | 1.051         | 1.035         | 1.084         | Q08AE8-2     | SPIRE1    | Isoform 2 of Protein spire homolog 1                           |
| 1.068           | 0.915        | 0.950        | 1.050        | 0.929        | 0.983        | 1.030        | 1.267        | 1.034        | 0.948         | 0.898         | 1.133         | Q9HCD6-2     | TANC2     | Isoform 2 of Protein TANC2                                     |
| 1.045           | 0.992        | 1.018        | 1.002        | 0.952        | 0.973        | 0.936        | 0.973        | 0.999        | 0.999         | 0.959         | 0.968         | O94855-2     | SEC24D    | Isoform 2 of Protein transport protein Sec24D                  |
| 0.850           | 1.049        | 1.117        | 0.968        | 0.952        | 1.818        | 0.931        | 1.227        | 1.312        | 1.210         | 0.840         | 1.599         | Q9Y2J8-2     | PADI2     | Isoform 2 of Protein-arginine deiminase type-2                 |
| 1.028           | 1.001        | 1.018        | 1.011        | 1.044        | 1.000        | 1.021        | 1.086        | 1.034        | 0.957         | 1.013         | 0.990         | P12931-2     | SRC       | Isoform 2 of Proto-oncogene tyrosine-protein kinase Src        |

| Abundance Ratio |              |              |              |              |              |              |              |              |               |               |               | Accession ID | Gene name | Protein Description                                                  |
|-----------------|--------------|--------------|--------------|--------------|--------------|--------------|--------------|--------------|---------------|---------------|---------------|--------------|-----------|----------------------------------------------------------------------|
| 1 d<br>M1/C1    | 1 d<br>M2/C2 | 1 d<br>M3/C3 | 4 d<br>M1/C1 | 4 d<br>M2/C2 | 4 d<br>M3/C3 | 7 d<br>M1/C1 | 7 d<br>M2/C2 | 7 d<br>M3/C3 | 10 d<br>M1/C1 | 10 d<br>M2/C2 | 10 d<br>M3/C3 |              |           |                                                                      |
| 0.982           | 1.020        | 1.008        | 0.990        | 0.983        | 0.999        | 0.997        | 1.038        | 1.010        | 0.990         | 0.977         | 1.000         | Q7L2E3-2     | DHX30     | Isoform 2 of Putative ATP-dependent RNA helicase DHX30               |
| 0.987           | 0.975        | 1.005        | 1.004        | 1.010        | 1.002        | 0.970        | 0.984        | 1.012        | 1.013         | 1.013         | 0.983         | Q49A26-2     | GLYR1     | Isoform 2 of Putative oxidoreductase GLYR1                           |
| 1.215           | 0.934        | 1.106        | 1.049        | 0.980        | 0.995        | 0.996        | 1.126        | 1.094        | 0.884         | 0.976         | 0.908         | O75061-2     | DNAJC6    | Isoform 2 of Putative tyrosine-protein phosphatase auxilin           |
| 1.233           | 1.136        | 1.126        | 1.120        | 0.877        | 1.073        | 0.988        | 1.116        | 1.039        |               |               |               | Q7L804-2     | RAB11FIP2 | Isoform 2 of Rab11 family-interacting protein 2                      |
| 1.038           | 1.025        | 1.002        | 0.934        | 0.946        | 1.037        | 0.967        | 1.024        | 1.023        | 1.023         | 0.959         | 1.048         | Q9UNT1-2     | RABL2B    | Isoform 2 of Rab-like protein 2B                                     |
| 1.012           | 1.037        | 0.932        | 0.993        | 0.942        | 1.000        | 1.000        | 1.056        | 1.026        | 1.014         | 1.024         | 1.033         | P04049-2     | RAF1      | Isoform 2 of RAF proto-oncogene serine/threonine-protein kinase      |
| 1.134           | 1.172        | 1.142        | 0.864        | 0.949        | 1.184        | 0.959        | 1.048        | 1.158        | 1.335         | 0.966         | 1.228         | Q3MIN7-2     | RGL3      | Isoform 2 of Ral guanine nucleotide dissociation stimulator-like 3   |
| 1.016           | 0.993        | 1.014        | 1.001        | 0.964        | 0.976        | 0.992        | 0.979        | 0.974        | 1.017         | 1.002         | 1.018         | Q9H6Z4-2     | RANBP3    | Isoform 2 of Ran-binding protein 3                                   |
| 0.750           | 1.269        | 1.599        | 0.830        | 1.028        | 1.257        |              |              |              |               |               |               | Q8WYP3-2     | RIN2      | Isoform 2 of Ras and Rab interactor 2                                |
|                 |              |              |              |              |              | 0.996        | 0.700        | 1.033        |               |               |               | Q9H2L5-2     | RASSF4    | Isoform 2 of Ras association domain-containing protein 4             |
| 0.990           | 1.006        | 0.997        | 0.992        | 0.994        | 1.027        | 0.976        | 1.052        | 1.028        | 0.957         | 1.012         | 1.018         | Q9UJF2-2     | RASAL2    | Isoform 2 of Ras GTPase-activating protein nGAP                      |
| 1.070           | 0.998        | 1.006        | 1.022        | 1.093        | 0.970        | 0.969        | 0.954        | 1.019        | 0.963         | 0.972         | 0.924         | Q5VZM2-2     | RRAGB     | Isoform 2 of Ras-related GTP-binding protein B                       |
| 1.020           | 1.033        | 1.119        | 0.984        | 0.865        | 0.987        | 1.013        | 1.122        | 1.003        | 0.933         | 0.910         | 1.059         | A4D1S5-2     | RAB19     | Isoform 2 of Ras-related protein Rab-19                              |
|                 |              |              | 1.085        | 0.910        | 0.964        | 0.980        | 1.195        | 1.004        | 0.951         | 1.044         | 0.994         | P61018-2     | RAB4B     | Isoform 2 of Ras-related protein Rab-4B                              |
| 0.947           | 0.994        | 0.964        | 0.997        | 0.909        | 1.031        | 0.999        | 1.071        | 1.027        | 1.031         | 1.065         | 1.071         | P51148-2     | RAB5C     | Isoform 2 of Ras-related protein Rab-5C                              |
| 0.988           | 0.980        | 0.972        | 0.990        | 0.958        | 1.001        | 0.993        | 1.015        | 0.981        | 1.015         | 1.014         | 1.034         | P11234-2     | RALB      | Isoform 2 of Ras-related protein Rab-B                               |
| 1.050           | 0.976        | 1.083        | 0.899        | 0.942        | 1.075        | 1.026        | 0.986        | 1.007        | 0.961         | 0.970         | 1.004         | Q92766-2     | RREB1     | Isoform 2 of Ras-responsive element-binding protein 1                |
| 1.029           | 1.137        | 0.997        | 0.994        | 0.895        | 0.898        | 0.939        | 1.137        | 1.088        | 1.040         | 1.079         | 0.993         | O00559-2     | EBAG9     | Isoform 2 of Receptor-binding cancer antigen expressed on SiSo cells |
| 0.992           | 1.020        | 1.011        | 1.046        | 0.969        | 1.025        | 1.126        | 1.039        | 1.016        | 1.038         | 0.995         | 1.073         | P28827-2     | PTPRM     | Isoform 2 of Receptor-type tyrosine-protein phosphatase mu           |
| 0.948           | 1.015        | 0.961        | 0.998        | 1.049        | 1.007        | 1.027        | 1.061        | 1.013        | 1.021         | 1.046         | 1.035         | P18754-2     | RCC1      | Isoform 2 of Regulator of chromosome condensation                    |
| 1.038           | 0.981        | 1.026        | 0.998        | 0.975        | 1.110        | 1.100        | 1.025        | 1.065        | 1.087         | 1.134         | 1.140         | Q9BWE0-4     | REPIN1    | Isoform 2 of Replication initiator 1                                 |
| 1.003           | 0.999        | 0.992        | 1.001        | 0.974        | 0.999        | 0.962        | 1.010        | 1.017        | 1.029         | 1.037         | 1.027         | Q14257-2     | RCN2      | Isoform 2 of Reticulocalbin-2                                        |
| 0.928           | 1.005        | 0.957        | 0.931        | 0.917        | 0.983        | 1.010        | 1.085        | 1.035        | 1.073         | 0.984         | 1.103         | Q9NQC3-2     | RTN4      | Isoform 2 of Reticulon-4                                             |
| 0.758           | 1.004        | 1.078        | 0.828        | 0.811        | 1.116        | 0.839        | 0.565        | 0.892        | 0.833         | 0.796         | 0.736         | Q15291-2     | RBBP5     | Isoform 2 of Retinoblastoma-binding protein 5                        |
| 0.956           | 0.969        | 1.041        | 0.965        | 0.927        | 1.020        | 0.977        | 1.005        | 1.038        | 0.897         | 1.001         | 0.997         | P28702-3     | RXRB      | Isoform 2 of Retinoic acid receptor RXR-beta                         |
| 1.103           | 1.048        | 0.977        |              |              |              |              |              |              |               |               |               | Q14CB8-2     | ARHGAP19  | Isoform 2 of Rho GTPase-activating protein 19                        |
|                 |              |              | 0.855        | 0.952        | 0.813        | 1.210        | 1.042        | 1.104        |               |               |               | Q9C0H5-2     | ARHGAP39  | Isoform 2 of Rho GTPase-activating protein 39                        |

| Abundance Ratio |              |              |              |              |              |              |              |              |               |               |               | Accession ID | Gene name | Protein Description                                                                            |
|-----------------|--------------|--------------|--------------|--------------|--------------|--------------|--------------|--------------|---------------|---------------|---------------|--------------|-----------|------------------------------------------------------------------------------------------------|
| 1 d<br>M1/C1    | 1 d<br>M2/C2 | 1 d<br>M3/C3 | 4 d<br>M1/C1 | 4 d<br>M2/C2 | 4 d<br>M3/C3 | 7 d<br>M1/C1 | 7 d<br>M2/C2 | 7 d<br>M3/C3 | 10 d<br>M1/C1 | 10 d<br>M2/C2 | 10 d<br>M3/C3 |              |           |                                                                                                |
| 1.074           | 1.027        | 1.005        | 1.036        | 1.022        | 1.038        | 1.045        | 1.054        | 0.997        | 0.956         | 0.977         | 0.993         | O15085-2     | ARHGEF11  | Isoform 2 of Rho guanine nucleotide exchange factor 11                                         |
| 0.886           | 0.985        | 1.370        |              |              |              | 0.936        | 0.935        | 1.006        |               |               |               | Q9NR81-2     | ARHGEF3   | Isoform 2 of Rho guanine nucleotide exchange factor 3                                          |
| 0.957           | 1.060        | 1.066        | 1.116        | 0.980        | 1.077        | 1.025        | 0.987        | 1.022        | 1.145         | 1.187         | 1.073         | Q6NTF9-2     | RHBDD2    | Isoform 2 of Rhomboid domain-containing protein 2                                              |
|                 |              |              | 0.970        | 1.010        | 1.082        | 1.059        | 1.044        | 0.971        | 1.268         | 1.128         | 1.127         | Q9BST9-2     | RTKN      | Isoform 2 of Rhotekin                                                                          |
| 1.042           | 1.005        | 1.012        | 1.030        | 1.026        | 0.981        | 1.026        | 1.072        | 1.008        | 0.990         | 1.005         | 1.035         | P78346-2     | RPP30     | Isoform 2 of Ribonuclease P protein subunit p30                                                |
| 0.924           | 0.997        | 0.991        | 0.959        | 0.965        | 1.020        | 1.073        | 1.160        | 1.029        | 0.902         | 0.919         | 1.051         | P31350-2     | RRM2      | Isoform 2 of Ribonucleoside-diphosphate reductase subunit M2                                   |
| 0.974           | 1.009        | 1.010        | 1.007        | 1.002        | 1.012        | 0.991        | 1.016        | 0.995        | 1.025         | 0.998         | 0.989         | Q15418-2     | RPS6KA1   | Isoform 2 of Ribosomal protein S6 kinase alpha-1                                               |
| 0.975           | 0.953        | 1.022        | 0.992        | 0.982        | 0.955        | 1.034        | 1.066        | 0.940        | 1.104         | 0.987         | 1.149         | Q9UK32-2     | RPS6KA6   | Isoform 2 of Ribosomal protein S6 kinase alpha-6                                               |
|                 |              |              | 1.049        | 0.983        | 1.027        | 0.919        | 1.069        | 1.079        | 0.971         | 0.964         | 1.149         | Q8N5U6-2     | RNF10     | Isoform 2 of RING finger protein 10                                                            |
| 0.946           | 0.933        | 0.986        | 0.972        | 1.056        | 0.994        | 0.979        | 0.825        | 1.013        | 0.993         | 1.006         | 1.041         | O00442-2     | RTCA      | Isoform 2 of RNA 3'-terminal phosphate cyclase                                                 |
| 1.338           | 1.416        | 1.161        | 0.948        | 1.030        | 1.046        | 1.359        | 1.154        | 1.350        |               |               |               | Q5T8P6-2     | RBM26     | Isoform 2 of RNA-binding protein 26                                                            |
| 1.002           | 0.995        | 0.959        | 1.001        | 1.048        | 0.994        | 1.006        | 1.001        | 1.011        | 1.022         | 1.025         | 1.009         | Q14498-2     | RBM39     | Isoform 2 of RNA-binding protein 39                                                            |
| 1.029           | 1.021        | 1.008        | 0.883        | 0.907        | 1.103        | 1.014        | 1.018        | 1.008        | 1.113         | 0.955         | 1.111         | Q9Y5S9-2     | RBM8A     | Isoform 2 of RNA-binding protein 8A                                                            |
| 1.041           | 0.964        | 1.019        | 1.076        | 0.921        | 1.015        | 1.159        | 1.118        | 1.074        | 1.114         | 1.038         | 1.080         | Q9Y6N7-2     | ROBO1     | Isoform 2 of Roundabout homolog 1                                                              |
| 1.305           | 1.097        | 0.956        | 1.111        | 0.964        | 0.908        | 1.144        | 1.081        | 1.091        | 1.169         | 1.120         | 0.956         | Q92736-2     | RYR2      | Isoform 2 of Ryanodine receptor 2                                                              |
| 1.078           | 0.981        | 1.052        | 1.037        | 0.936        | 1.036        | 1.076        | 1.074        | 1.104        | 0.894         | 1.013         | 1.008         | Q92503-2     | SEC14L1   | Isoform 2 of SEC14-like protein 1                                                              |
| 1.007           | 0.973        | 0.981        | 1.013        | 1.055        | 0.998        | 1.034        | 0.927        | 1.029        | 1.016         | 1.004         | 1.006         | Q12765-2     | SCRN1     | Isoform 2 of Secernin-1                                                                        |
| 0.979           | 0.992        | 0.990        | 0.978        | 0.993        | 0.979        | 0.988        | 0.991        | 0.980        | 0.986         | 0.998         | 0.975         | Q9NVA2-2     |           | 11-Sep Isoform 2 of Septin-11                                                                  |
| 1.013           | 1.001        | 0.994        | 0.984        | 0.970        | 0.982        | 0.978        | 1.007        | 0.999        | 1.005         | 1.010         | 0.988         | Q15019-2     |           | 2-Sep Isoform 2 of Septin-2                                                                    |
| 1.008           | 1.012        | 0.984        | 0.982        | 0.998        | 0.965        | 0.990        | 0.939        | 0.982        | 1.000         | 1.016         | 1.008         | Q16181-2     |           | 7-Sep Isoform 2 of Septin-7                                                                    |
|                 |              |              | 1.053        | 0.906        | 0.848        |              |              |              |               |               |               | O95084-2     | PRSS23    | Isoform 2 of Serine protease 23                                                                |
| 0.986           | 0.979        | 1.014        | 0.977        | 0.958        | 1.040        | 0.946        | 1.035        | 1.042        | 0.946         | 0.970         | 0.986         | Q13188-2     | STK3      | Isoform 2 of Serine/threonine-protein kinase 3                                                 |
| 1.013           | 1.040        | 1.000        | 1.008        | 0.968        | 1.034        | 1.008        | 1.069        | 1.069        | 0.877         | 0.887         | 1.107         | Q16512-2     | PKN1      | Isoform 2 of Serine/threonine-protein kinase N1                                                |
| 0.915           | 1.150        | 0.947        | 1.069        | 0.961        | 0.991        | 1.036        | 0.972        | 1.024        | 0.834         | 1.017         | 1.035         | Q9HC98-2     | NEK6      | Isoform 2 of Serine/threonine-protein kinase Nek6                                              |
| 1.000           | 0.953        | 1.011        | 0.993        | 0.974        | 1.070        | 1.014        | 1.018        | 1.025        | 1.036         | 0.971         | 1.139         | Q9UKI8-2     | TLK1      | Isoform 2 of Serine/threonine-protein kinase tousled-like 1                                    |
| 1.024           | 1.019        | 1.050        | 1.027        | 0.972        | 0.993        | 1.080        | 1.172        | 0.965        | 1.067         | 0.983         | 1.027         | Q86UE8-2     | TLK2      | Isoform 2 of Serine/threonine-protein kinase tousled-like 2                                    |
| 0.996           | 0.985        | 1.018        | 0.986        | 1.010        | 0.990        | 0.988        | 0.927        | 0.971        | 1.010         | 0.952         | 1.050         | P63151-2     | PPP2R2A   | Isoform 2 of Serine/threonine-protein phosphatase 2A 55 kDa regulatory subunit B alpha isoform |

| Abundance Ratio |              |              |              |              |              |              |              |              |               |               |               | Accession ID | Gene name | Protein Description                                                                           |
|-----------------|--------------|--------------|--------------|--------------|--------------|--------------|--------------|--------------|---------------|---------------|---------------|--------------|-----------|-----------------------------------------------------------------------------------------------|
| 1 d<br>M1/C1    | 1 d<br>M2/C2 | 1 d<br>M3/C3 | 4 d<br>M1/C1 | 4 d<br>M2/C2 | 4 d<br>M3/C3 | 7 d<br>M1/C1 | 7 d<br>M2/C2 | 7 d<br>M3/C3 | 10 d<br>M1/C1 | 10 d<br>M2/C2 | 10 d<br>M3/C3 |              |           |                                                                                               |
| 1.004           | 1.131        | 1.119        | 0.987        | 1.135        | 0.988        | 1.016        | 1.151        | 1.083        |               |               |               | P30154-2     | PPP2R1B   | Isoform 2 of Serine/threonine-protein phosphatase 2A 65 kDa regulatory subunit A beta isoform |
| 0.956           | 1.042        | 1.032        | 0.985        | 0.989        | 1.027        | 1.018        | 1.046        | 1.007        | 1.051         | 0.994         | 1.056         | Q08209-2     | PPP3CA    | Isoform 2 of Serine/threonine-protein phosphatase 2B catalytic subunit alpha isoform          |
| 1.012           | 1.009        | 1.017        | 0.986        | 0.939        | 0.996        | 1.008        | 1.091        | 0.987        | 0.935         | 0.984         | 0.989         | Q5MIZ7-2     | PPP4R3B   | Isoform 2 of Serine/threonine-protein phosphatase 4 regulatory subunit 3B                     |
| 0.989           | 0.954        | 1.035        | 1.001        | 1.012        | 1.087        | 1.021        | 0.978        | 1.033        | 1.023         | 1.005         | 1.181         | Q8N8A2-2     | ANKRD44   | Isoform 2 of Serine/threonine-protein phosphatase 6 regulatory ankyrin repeat subunit B       |
| 1.038           | 1.008        | 0.985        | 1.027        | 1.051        | 0.976        | 1.031        | 1.046        | 0.995        | 1.014         | 1.000         | 0.995         | Q9Y3F4-2     | STRAP     | Isoform 2 of Serine-threonine kinase receptor-associated protein                              |
|                 |              |              | 0.837        | 0.808        | 1.088        | 0.876        | 1.179        | 1.067        |               |               |               | Q96P63-2     | SERPINB12 | Isoform 2 of Serpin B12                                                                       |
| 0.985           | 1.380        | 1.022        | 1.025        | 0.936        | 1.087        | 0.765        | 1.206        | 1.141        |               |               |               | Q9UQ49-2     | NEU3      | Isoform 2 of Sialidase-3                                                                      |
| 1.019           | 0.984        | 1.070        | 1.035        | 0.955        | 0.988        | 1.039        | 1.074        | 0.998        | 0.986         | 0.957         | 1.060         | Q9UGK3-2     | STAP2     | Isoform 2 of Signal-transducing adaptor protein 2                                             |
| 1.005           | 1.002        | 0.924        | 0.958        | 0.890        | 1.090        | 1.279        | 1.001        | 0.943        | 1.124         | 1.108         | 1.051         | Q96HU1-2     | SGSM3     | Isoform 2 of Small G protein signaling modulator 3                                            |
| 0.882           | 1.019        | 1.157        |              |              |              | 0.916        | 0.885        | 0.968        | 0.980         | 0.956         | 0.991         | Q8N5G0-2     | SMIM20    | Isoform 2 of Small integral membrane protein 20                                               |
|                 |              |              |              |              |              | 1.324        | 1.026        | 1.097        | 1.144         | 1.063         | 1.084         | Q92581-2     | SLC9A6    | Isoform 2 of Sodium/hydrogen exchanger 6                                                      |
|                 |              |              | 0.945        | 0.710        | 1.018        | 0.982        | 1.224        | 1.134        |               |               |               | P78383-2     | SLC35B1   | Isoform 2 of Solute carrier family 35 member B1                                               |
| 1.070           | 1.020        | 1.011        | 0.980        | 1.002        | 1.036        | 0.991        | 1.066        | 1.035        | 1.049         | 0.959         | 1.115         | Q96RF0-2     | SNX18     | Isoform 2 of Sorting nexin-18                                                                 |
| 0.982           | 0.991        | 0.994        | 1.008        | 0.961        | 1.033        | 1.019        | 0.966        | 1.005        | 0.997         | 0.958         | 1.025         | Q9NUQ6-2     | SPATS2L   | Isoform 2 of SPATS2-like protein                                                              |
| 1.079           | 0.981        | 1.067        | 1.192        | 1.066        | 1.030        | 0.943        | 0.782        | 0.982        | 0.828         | 0.906         | 0.996         | Q01082-3     | SPTBN1    | Isoform 2 of Spectrin beta chain, non-erythrocytic 1                                          |
| 0.985           | 1.009        | 0.964        | 0.942        | 0.917        | 0.946        | 0.963        | 0.940        | 0.984        | 1.007         | 0.934         | 1.020         | Q8TB22-2     | SPATA20   | Isoform 2 of Spermatogenesis-associated protein 20                                            |
|                 |              |              |              |              |              | 0.919        | 1.312        | 0.995        | 0.959         | 0.945         | 0.892         | Q9NYA1-2     | SPHK1     | Isoform 2 of Sphingosine kinase 1                                                             |
| 1.032           | 1.002        | 1.000        | 0.998        | 0.938        | 0.982        | 1.008        | 1.077        | 0.996        | 0.999         | 0.980         | 1.000         | Q12872-2     | SFSWAP    | Isoform 2 of Splicing factor, suppressor of white-apricot homolog                             |
| 0.988           | 0.977        | 1.009        | 0.973        | 1.017        | 1.034        | 0.976        | 0.970        | 0.998        | 1.041         | 0.996         | 1.032         | Q8WXA9-2     | SREK1     | Isoform 2 of Splicing regulatory glutamine/lysine-rich protein 1                              |
| 1.059           | 1.039        | 1.109        | 0.940        | 1.054        | 1.009        | 0.947        | 1.019        | 0.980        | 0.960         | 1.057         | 1.094         | P78362-2     | SRPK2     | Isoform 2 of SRSF protein kinase 2                                                            |
| 0.984           | 1.000        | 1.016        | 0.991        | 1.015        | 1.043        | 0.985        | 0.914        | 1.005        | 1.048         | 1.033         | 1.048         | Q9H2G2-2     | SLK       | Isoform 2 of STE20-like serine/threonine-protein kinase                                       |
| 0.987           | 1.007        | 0.960        | 1.004        | 1.056        | 0.973        | 0.983        | 0.929        | 0.986        | 0.975         | 1.017         | 0.972         | P31948-2     | STIP1     | Isoform 2 of Stress-induced-phosphoprotein 1                                                  |
|                 |              |              | 1.277        | 1.029        | 0.842        |              |              |              |               |               |               | Q9P246-2     | STIM2     | Isoform 2 of Stromal interaction molecule 2                                                   |

| Abundance Ratio |              |              |              |              |              |              |              |              |               |               |               | Accession ID | Gene name | Protein Description                                                                                                       |
|-----------------|--------------|--------------|--------------|--------------|--------------|--------------|--------------|--------------|---------------|---------------|---------------|--------------|-----------|---------------------------------------------------------------------------------------------------------------------------|
| 1 d<br>M1/C1    | 1 d<br>M2/C2 | 1 d<br>M3/C3 | 4 d<br>M1/C1 | 4 d<br>M2/C2 | 4 d<br>M3/C3 | 7 d<br>M1/C1 | 7 d<br>M2/C2 | 7 d<br>M3/C3 | 10 d<br>M1/C1 | 10 d<br>M2/C2 | 10 d<br>M3/C3 |              |           |                                                                                                                           |
| 1.008           | 0.997        | 1.027        | 0.959        | 0.985        | 1.013        | 1.017        | 0.856        | 1.037        | 1.060         | 1.012         | 1.075         | Q8IYB5-2     | SMAP1     | Isoform 2 of Stromal membrane-associated protein 1                                                                        |
| 1.052           | 1.021        | 1.035        | 1.007        | 1.004        | 1.024        | 1.024        | 0.978        | 0.999        | 1.034         | 1.010         | 1.067         | Q96SB8-2     | SMC6      | Isoform 2 of Structural maintenance of chromosomes protein 6                                                              |
| 1.051           | 0.999        | 1.050        | 0.989        | 0.965        | 1.009        | 0.984        | 0.970        | 0.970        | 1.062         | 0.996         | 1.012         | P51649-2     | ALDH5A1   | Isoform 2 of Succinate-semialdehyde dehydrogenase, mitochondrial                                                          |
| 0.810           | 0.890        | 0.897        | 1.015        | 0.949        | 0.963        | 0.918        | 0.855        | 0.993        | 1.092         | 1.004         | 1.100         | Q9BRV8-2     | SIKE1     | Isoform 2 of Suppressor of IKBKE 1                                                                                        |
| 1.056           | 1.009        | 1.018        | 1.019        | 0.925        | 0.998        | 1.003        | 1.063        | 1.020        | 0.926         | 0.954         | 0.941         | Q9H4L7-2     | SMARCAD1  | Isoform 2 of SWI/SNF-related matrix-associated actin-dependent regulator of chromatin subfamily A containing DEAD/H box 1 |
| 0.915           | 1.004        | 0.943        | 1.013        | 0.919        | 1.024        | 1.148        | 0.929        | 1.060        | 1.257         | 1.048         | 1.140         | O43760-2     | SYNGR2    | Isoform 2 of Synaptogyrin-2                                                                                               |
| 1.027           | 1.006        | 1.074        | 0.973        | 0.984        | 1.003        | 0.923        | 0.882        | 0.963        | 0.900         | 0.989         | 0.998         | Q8N3V7-2     | SYNPO     | Isoform 2 of Synaptopodin                                                                                                 |
| 0.975           | 1.020        | 1.000        | 1.008        | 1.000        | 1.026        | 1.017        | 1.020        | 1.025        | 1.048         | 1.026         | 1.075         | P61764-2     | STXBP1    | Isoform 2 of Syntaxin-binding protein 1                                                                                   |
| 1.049           | 0.987        | 1.016        | 1.018        | 0.950        | 0.986        | 0.980        | 0.927        | 0.982        | 1.026         | 0.981         | 1.044         | P82094-2     | TMF1      | Isoform 2 of TATA element modulatory factor                                                                               |
| 1.037           | 0.997        | 1.007        | 0.997        | 0.977        | 1.008        | 1.047        | 1.025        | 1.047        | 1.029         | 0.979         | 1.040         | Q92609-2     | TBC1D5    | Isoform 2 of TBC1 domain family member 5                                                                                  |
| 1.128           | 1.069        | 1.036        | 0.989        | 1.003        | 1.080        | 1.049        | 1.117        | 0.972        | 1.066         | 1.099         | 1.056         | Q7Z6L1-2     | TECPR1    | Isoform 2 of Tectonin beta-propeller repeat-containing protein 1                                                          |
| 0.949           | 0.883        | 0.864        | 0.970        | 0.992        | 1.106        | 1.103        | 1.041        | 1.181        | 0.950         | 1.008         | 1.149         | Q86YL5-2     | TDRP      | Isoform 2 of Testis development-related protein                                                                           |
| 1.143           | 1.076        | 0.799        | 1.035        | 0.993        | 1.050        | 0.999        | 1.097        | 1.027        | 1.008         | 0.972         | 1.036         | Q8IWB9-2     | TEX2      | Isoform 2 of Testis-expressed protein 2                                                                                   |
| 1.060           | 1.012        | 1.030        | 0.966        | 0.946        | 0.993        | 1.000        | 1.069        | 0.987        | 0.957         | 0.980         | 1.052         | Q9BZE9-2     | ASPSCR1   | Isoform 2 of Tether containing UBX domain for GLUT4                                                                       |
| 0.983           | 1.002        | 1.071        | 0.986        | 0.884        | 1.004        | 0.986        | 0.962        | 0.997        |               |               |               | Q9H892-2     | TTC12     | Isoform 2 of Tetratricopeptide repeat protein 12                                                                          |
| 1.019           | 1.026        | 1.188        | 1.083        | 0.909        | 1.051        | 1.080        | 1.092        | 1.079        | 1.052         | 0.943         | 1.070         | Q86TV6-2     | TTC7B     | Isoform 2 of Tetratricopeptide repeat protein 7B                                                                          |
| 1.044           | 1.022        | 1.034        |              |              |              |              |              |              |               |               |               | P36897-2     | TGFBR1    | Isoform 2 of TGF-beta receptor type-1                                                                                     |
| 1.332           | 1.000        | 1.337        | 1.258        | 1.026        | 1.389        |              |              |              |               |               |               | P37173-2     | TGFBR2    | Isoform 2 of TGF-beta receptor type-2                                                                                     |
| 1.035           | 1.012        | 1.058        | 1.039        | 1.069        | 1.015        | 1.004        | 0.950        | 1.024        | 0.980         | 1.018         | 0.973         | Q86XR7-2     | TICAM2    | Isoform 2 of TIR domain-containing adapter molecule 2                                                                     |
| 1.215           | 0.901        | 1.093        | 1.247        | 0.880        | 1.064        | 1.088        | 0.837        | 1.008        | 1.094         | 1.000         | 1.046         | Q12933-2     | TRAF2     | Isoform 2 of TNF receptor-associated factor 2                                                                             |
| 1.019           | 1.168        | 0.998        | 0.987        | 0.779        | 1.485        | 0.869        | 0.755        | 1.633        |               |               |               | O00463-2     | TRAF5     | Isoform 2 of TNF receptor-associated factor 5                                                                             |
| 0.981           | 0.975        | 1.008        | 0.983        | 0.959        | 0.990        | 1.022        | 0.965        | 0.969        | 1.062         | 0.981         | 1.077         | Q12888-2     | TP53BP1   | Isoform 2 of TP53-binding protein 1                                                                                       |
|                 |              |              | 1.080        | 0.878        | 1.023        |              |              |              | 0.914         | 1.209         | 1.087         | O75865-2     | TRAPPC6A  | Isoform 2 of Trafficking protein particle complex subunit 6A                                                              |
| 1.036           | 1.053        | 1.066        | 1.024        | 0.949        | 1.019        | 1.024        | 1.069        | 1.049        | 1.012         | 0.998         | 1.052         | Q96Q05-2     | TRAPPC9   | Isoform 2 of Trafficking protein particle complex subunit 9                                                               |
| 0.882           | 0.969        | 0.953        | 1.105        | 1.110        | 1.054        | 1.016        | 0.931        | 1.016        | 1.032         | 1.012         | 1.211         | Q15170-2     | TCEAL1    | Isoform 2 of Transcription elongation factor A protein-like 1                                                             |
| 0.946           | 1.004        | 1.027        | 1.018        | 1.007        | 1.105        | 1.033        | 0.836        | 0.996        | 1.054         | 1.004         | 1.076         | Q96EI5-2     | TCEAL4    | Isoform 2 of Transcription elongation factor A protein-like 4                                                             |



| Abundance Ratio |              |              |              |              |              |              |              |              |               |               |               | Accession ID | Gene name | Protein Description                                                     |
|-----------------|--------------|--------------|--------------|--------------|--------------|--------------|--------------|--------------|---------------|---------------|---------------|--------------|-----------|-------------------------------------------------------------------------|
| 1 d<br>M1/C1    | 1 d<br>M2/C2 | 1 d<br>M3/C3 | 4 d<br>M1/C1 | 4 d<br>M2/C2 | 4 d<br>M3/C3 | 7 d<br>M1/C1 | 7 d<br>M2/C2 | 7 d<br>M3/C3 | 10 d<br>M1/C1 | 10 d<br>M2/C2 | 10 d<br>M3/C3 |              |           |                                                                         |
| 0.993           | 1.101        | 0.983        | 1.008        | 0.875        | 0.984        | 1.057        | 0.928        | 1.046        | 0.886         | 1.178         | 1.223         | Q7Z7C8-2     | TAF8      | Isoform 2 of Transcription initiation factor TFIID subunit 8            |
| 0.983           | 1.016        | 0.970        | 0.992        | 1.036        | 0.996        | 0.973        | 1.046        | 0.989        | 0.927         | 1.002         | 0.919         | P37802-2     | TAGLN2    | Isoform 2 of Transgelin-2                                               |
| 1.012           | 1.011        | 0.988        | 1.006        | 1.010        | 0.987        | 0.962        | 1.030        | 0.991        | 0.961         | 1.018         | 0.944         | P29401-2     | TKT       | Isoform 2 of Transketolase                                              |
| 0.897           | 0.955        | 1.028        | 0.900        | 0.908        | 0.965        | 0.846        | 0.649        | 1.029        | 1.026         | 1.046         | 1.066         | Q9UNL2-2     | SSR3      | Isoform 2 of Translocon-associated protein subunit gamma                |
| 1.255           | 1.140        | 1.357        | 0.925        | 0.990        | 0.826        | 0.882        | 1.230        | 0.892        | 1.118         | 1.253         | 0.974         | Q96DC7-2     | TMCO6     | Isoform 2 of Transmembrane and coiled-coil domain-containing protein 6  |
| 1.113           | 1.031        | 0.926        | 0.974        | 0.789        | 0.955        | 0.942        | 0.980        | 1.076        |               |               |               | Q9Y3A6-2     | TMED5     | Isoform 2 of Transmembrane emp24 domain-containing protein 5            |
| 1.331           | 1.008        | 1.331        | 0.696        | 0.675        | 0.863        | 1.027        | 1.290        | 0.946        |               |               |               | Q24JP5-2     | TMEM132A  | Isoform 2 of Transmembrane protein 132A                                 |
|                 |              |              | 0.969        | 0.897        | 1.159        | 0.888        | 1.165        | 1.365        |               |               |               | Q9H813-2     | TMEM206   | Isoform 2 of Transmembrane protein 206                                  |
| 1.049           | 0.994        | 0.968        | 0.981        | 0.883        | 0.986        | 1.003        | 1.026        | 1.002        | 1.146         | 0.968         | 0.998         | Q9H330-2     | TMEM245   | Isoform 2 of Transmembrane protein 245                                  |
|                 |              |              | 0.884        | 0.777        | 1.134        |              |              |              |               |               |               | Q12767-2     | TMEM94    | Isoform 2 of Transmembrane protein 94                                   |
| 0.965           | 1.009        | 0.998        | 1.042        | 1.009        | 1.045        | 1.004        | 1.105        | 1.015        | 1.020         | 0.973         | 1.034         | O14787-2     | TNPO2     | Isoform 2 of Transportin-2                                              |
| 0.981           | 0.971        | 1.039        | 1.021        | 0.929        | 1.013        | 1.019        | 1.012        | 0.948        | 1.069         | 1.002         | 1.072         | Q9C040-2     | TRIM2     | Isoform 2 of Tripartite motif-containing protein 2                      |
| 1.108           | 0.955        | 1.081        | 0.952        | 0.979        | 1.080        | 0.937        | 1.092        | 1.034        | 1.005         | 0.996         | 0.956         | Q969Y2-2     | GTPBP3    | Isoform 2 of tRNA modification GTPase GTPBP3, mitochondrial             |
| 1.358           | 1.513        | 1.476        | 0.988        | 1.059        | 1.043        | 1.052        | 1.194        | 1.048        | 1.230         | 1.257         | 1.318         | P17752-2     | TPH1      | Isoform 2 of Tryptophan 5-hydroxylase 1                                 |
| 1.033           | 0.928        | 1.020        | 1.012        | 0.997        | 0.997        | 0.932        | 1.103        | 0.981        | 1.055         | 1.050         | 1.332         | O75386-2     | TULP3     | Isoform 2 of Tubby-related protein 3                                    |
| 0.969           | 1.086        | 0.986        | 1.050        | 1.139        | 1.032        | 1.129        | 0.794        | 1.039        | 1.048         | 1.059         | 0.961         | Q86T03-2     | TMEM55B   | Isoform 2 of Type 1 phosphatidylinositol 4,5-bisphosphate 4-phosphatase |
| 0.971           | 0.930        | 1.067        | 0.997        | 0.948        | 1.003        | 0.994        | 0.921        | 1.009        | 0.895         | 0.993         | 0.980         | Q6RW13-2     | AGTRAP    | Isoform 2 of Type-1 angiotensin II receptor-associated protein          |
|                 |              |              | 1.188        | 1.237        | 0.983        |              |              |              |               |               |               | P07948-2     | LYN       | Isoform 2 of Tyrosine-protein kinase Lyn                                |
| 0.962           | 1.020        | 0.995        | 0.994        | 0.987        | 1.014        | 0.987        | 0.997        | 0.997        | 1.008         | 1.016         | 1.035         | Q06124-2     | PTPN11    | Isoform 2 of Tyrosine-protein phosphatase non-receptor type 11          |
| 1.102           | 0.961        | 1.143        | 1.035        | 0.952        | 1.068        | 1.013        | 0.966        | 1.070        | 1.012         | 1.008         | 1.065         | O95551-2     | TDP2      | Isoform 2 of Tyrosyl-DNA phosphodiesterase 2                            |
| 0.967           | 0.999        | 0.982        | 0.970        | 0.980        | 0.990        | 1.004        | 0.961        | 0.943        | 1.065         | 1.022         | 1.037         | P08621-2     | SNRNP70   | Isoform 2 of U1 small nuclear ribonucleoprotein 70 kDa                  |
| 1.132           | 1.040        | 1.160        | 0.973        | 0.980        | 1.168        | 0.943        | 1.120        | 1.015        |               |               |               | Q16560-2     | SNRNP35   | Isoform 2 of U11/U12 small nuclear ribonucleoprotein 35 kDa protein     |
| 1.073           | 1.026        | 1.006        | 1.048        | 1.007        | 0.975        | 1.024        | 1.062        | 1.003        | 1.025         | 1.013         | 1.015         | Q14694-2     | USP10     | Isoform 2 of Ubiquitin carboxyl-terminal hydrolase 10                   |
| 0.986           | 1.023        | 1.112        | 1.001        | 0.888        | 0.947        | 0.993        | 1.102        | 1.040        | 1.034         | 1.028         | 1.068         | Q9P275-2     | USP36     | Isoform 2 of Ubiquitin carboxyl-terminal hydrolase 36                   |
| 1.000           | 1.008        | 1.038        | 1.018        | 0.991        | 1.030        | 1.022        | 1.059        | 0.995        | 1.011         | 1.037         | 1.002         | Q14139-2     | UBE4A     | Isoform 2 of Ubiquitin conjugation factor E4 A                          |
| 0.980           | 1.177        | 1.008        |              |              |              |              |              |              |               |               |               | Q14157-1     | UBAP2L    | Isoform 2 of Ubiquitin-associated protein 2-like                        |

| Abundance Ratio |              |              |              |              |              |              |              |              |               |               |               | Accession ID | Gene name | Protein Description                                                       |
|-----------------|--------------|--------------|--------------|--------------|--------------|--------------|--------------|--------------|---------------|---------------|---------------|--------------|-----------|---------------------------------------------------------------------------|
| 1 d<br>M1/C1    | 1 d<br>M2/C2 | 1 d<br>M3/C3 | 4 d<br>M1/C1 | 4 d<br>M2/C2 | 4 d<br>M3/C3 | 7 d<br>M1/C1 | 7 d<br>M2/C2 | 7 d<br>M3/C3 | 10 d<br>M1/C1 | 10 d<br>M2/C2 | 10 d<br>M3/C3 |              |           |                                                                           |
| 1.070           | 0.950        | 1.049        | 0.967        | 0.943        | 0.978        | 1.057        | 0.965        | 1.068        | 1.122         | 0.964         | 1.100         | Q9BTM9-2     | URM1      | Isoform 2 of Ubiquitin-related modifier 1                                 |
| 0.979           | 1.006        | 1.033        | 0.951        | 0.948        | 1.051        | 0.986        | 1.074        | 1.005        | 0.991         | 0.947         | 1.034         | Q8NBZ7-2     | UXS1      | Isoform 2 of UDP-glucuronic acid decarboxylase 1                          |
| 1.200           | 1.108        | 0.838        | 0.994        | 0.820        | 1.068        |              |              |              |               |               |               | Q9Y2D2-2     | SLC35A3   | Isoform 2 of UDP-N-acetylglucosamine transporter                          |
| 0.862           | 0.924        | 1.071        | 1.018        | 0.901        | 1.104        | 1.000        | 0.850        | 0.982        | 1.094         | 1.069         | 1.125         | Q96D05-2     | C10orf35  | Isoform 2 of Uncharacterized protein C10orf35                             |
| 1.052           | 0.898        | 0.975        | 0.878        | 0.919        | 1.189        | 1.014        | 0.982        | 1.080        | 0.866         | 0.905         | 1.029         | Q6ZUT1-2     | C11orf57  | Isoform 2 of Uncharacterized protein C11orf57                             |
| 0.943           | 1.115        | 1.062        | 0.999        | 0.917        | 1.032        | 1.047        | 1.017        | 1.114        | 1.062         | 1.054         | 1.066         | Q9BV29-2     | C15orf57  | Isoform 2 of Uncharacterized protein C15orf57                             |
| 0.897           | 0.957        | 0.961        | 1.004        | 0.979        | 1.079        | 1.094        | 1.011        | 0.854        | 1.562         | 1.035         | 1.199         | Q5SNV9-2     | C1orf167  | Isoform 2 of Uncharacterized protein C1orf167                             |
| 2.798           | 3.001        | 2.739        | 5.166        | 4.952        | 4.623        | 6.679        | 4.357        | 4.313        | 5.310         | 3.574         | 5.205         | Q17RF5-2     | C4orf26   | Isoform 2 of Uncharacterized protein C4orf26                              |
| 1.069           | 1.120        | 0.919        | 0.838        | 0.844        | 0.900        | 1.043        | 0.888        | 0.915        | 1.000         | 1.198         | 1.043         | Q8WVX3-2     | C4orf3    | Isoform 2 of Uncharacterized protein C4orf3                               |
| 1.072           | 0.957        | 1.029        | 0.962        | 0.942        | 0.987        | 1.014        | 0.966        | 0.980        | 1.032         | 0.997         | 1.065         | Q9P206-2     | KIAA1522  | Isoform 2 of Uncharacterized protein KIAA1522                             |
| 0.962           | 1.027        | 1.016        | 1.022        | 0.981        | 1.147        | 1.002        | 1.108        | 1.072        | 1.033         | 1.039         | 1.087         | Q8IYS2-2     | KIAA2013  | Isoform 2 of Uncharacterized protein KIAA2013                             |
| 1.148           | 1.104        | 0.879        |              |              |              |              |              |              |               |               |               | O43795-2     | MYO1B     | Isoform 2 of Unconventional myosin-Ib                                     |
| 0.998           | 0.998        | 1.025        | 1.012        | 0.991        | 1.032        | 1.062        | 0.951        | 0.935        | 0.990         | 0.986         | 0.992         | Q7Z3D6-2     | C14orf159 | Isoform 2 of UPF0317 protein C14orf159, mitochondrial                     |
| 0.965           | 1.030        | 1.015        | 0.989        | 0.938        | 0.973        | 1.001        | 1.143        | 0.992        | 0.901         | 1.038         | 0.973         | Q9BPX7-2     | C7orf25   | Isoform 2 of UPF0415 protein C7orf25                                      |
|                 |              |              |              |              |              | 1.146        | 1.133        | 1.023        |               |               |               | Q7Z6I8-2     | C5orf24   | Isoform 2 of UPF0461 protein C5orf24                                      |
| 1.013           | 1.039        | 0.987        | 1.019        | 0.914        | 1.022        | 0.999        | 1.134        | 0.967        | 1.019         | 1.029         | 0.967         | Q9GZN8-2     | C20orf27  | Isoform 2 of UPF0687 protein C20orf27                                     |
| 1.015           | 0.907        | 0.987        | 0.952        | 0.926        | 0.965        | 0.909        | 0.871        | 1.002        | 1.042         | 0.958         | 1.029         | Q15906-2     | VPS72     | Isoform 2 of Vacuolar protein sorting-associated protein 72 homolog       |
| 0.970           | 0.989        | 0.998        | 0.992        | 0.944        | 0.992        | 1.047        | 1.137        | 1.029        | 1.050         | 1.081         | 1.005         | Q9H0V9-2     | LMAN2L    | Isoform 2 of VIP36-like protein                                           |
|                 |              |              |              |              |              |              |              |              | 1.140         | 0.576         | 1.146         | P11473-2     | VDR       | Isoform 2 of Vitamin D3 receptor                                          |
| 1.078           | 1.008        | 1.043        | 0.999        | 0.983        | 1.020        | 1.012        | 1.027        | 1.039        | 1.011         | 1.054         | 1.015         | Q13303-2     | KCNAB2    | Isoform 2 of Voltage-gated potassium channel subunit beta-2               |
| 0.941           | 0.984        | 1.020        | 1.034        | 1.007        | 1.050        | 0.984        | 1.057        | 1.024        | 0.987         | 0.975         | 1.038         | Q16864-2     | ATP6V1F   | Isoform 2 of V-type proton ATPase subunit F                               |
| 1.093           | 1.011        | 1.105        | 1.008        | 1.028        | 1.001        | 1.009        | 1.008        | 1.008        | 1.028         | 1.039         | 1.021         | Q9Y2I8-2     | WDR37     | Isoform 2 of WD repeat-containing protein 37                              |
|                 |              |              |              |              |              | 1.308        | 0.939        | 1.128        |               |               |               | P16989-2     | YBX3      | Isoform 2 of Y-box-binding protein 3                                      |
| 1.377           | 1.269        | 0.940        | 1.018        | 1.127        | 0.749        | 1.070        | 1.370        | 0.892        | 0.753         | 1.088         | 0.853         | Q8IY57-5     | YAF2      | Isoform 2 of YY1-associated factor 2                                      |
| 1.213           | 1.026        | 1.041        |              |              |              |              |              |              |               |               |               | O15156-2     | ZBTB7B    | Isoform 2 of Zinc finger and BTB domain-containing protein 7B             |
|                 |              |              | 1.000        | 1.062        | 0.937        | 1.007        | 0.937        | 1.329        |               |               |               | Q5T200-2     | ZC3H13    | Isoform 2 of Zinc finger CCCH domain-containing protein 13                |
| 0.946           | 0.985        | 1.042        | 0.982        | 0.923        | 1.043        | 1.010        | 1.050        | 1.020        | 1.000         | 1.004         | 1.020         | Q8N5A5-2     | ZGPAT     | Isoform 2 of Zinc finger CCCH-type with G patch domain-containing protein |
| 0.920           | 0.933        | 1.094        | 1.051        | 0.889        | 1.070        | 0.882        | 1.126        | 1.112        |               |               |               | P37275-2     | ZEB1      | Isoform 2 of Zinc finger E-box-binding homeobox 1                         |

| Abundance Ratio |              |              |              |              |              |              |              |              |               |               |               | Accession ID | Gene name | Protein Description                                                           |
|-----------------|--------------|--------------|--------------|--------------|--------------|--------------|--------------|--------------|---------------|---------------|---------------|--------------|-----------|-------------------------------------------------------------------------------|
| 1 d<br>M1/C1    | 1 d<br>M2/C2 | 1 d<br>M3/C3 | 4 d<br>M1/C1 | 4 d<br>M2/C2 | 4 d<br>M3/C3 | 7 d<br>M1/C1 | 7 d<br>M2/C2 | 7 d<br>M3/C3 | 10 d<br>M1/C1 | 10 d<br>M2/C2 | 10 d<br>M3/C3 |              |           |                                                                               |
| 0.987           | 0.834        | 1.043        | 0.974        | 0.893        | 0.984        | 1.038        | 1.045        | 0.979        | 1.043         | 1.015         | 1.031         | Q9BQ24-2     | ZFYVE21   | Isoform 2 of Zinc finger FYVE domain-containing protein 21                    |
| 0.949           | 0.903        | 1.054        | 0.904        | 0.995        | 1.095        | 0.994        | 0.861        | 0.955        | 1.073         | 0.957         | 1.226         | Q9Y6Q3-2     | ZFP37     | Isoform 2 of Zinc finger protein 37 homolog                                   |
| 1.019           | 1.006        | 0.987        | 1.044        | 0.982        | 0.966        | 1.050        | 0.895        | 0.990        | 0.995         | 0.996         | 0.986         | Q8TF68-2     | ZNF384    | Isoform 2 of Zinc finger protein 384                                          |
| 1.191           | 0.920        | 0.813        | 1.057        | 0.861        | 1.119        | 1.650        | 0.628        | 1.092        | 2.414         | 0.710         | 0.932         | Q96IQ9-2     | ZNF414    | Isoform 2 of Zinc finger protein 414                                          |
|                 |              |              | 0.946        | 1.008        | 1.101        | 0.889        | 1.486        | 0.820        |               |               |               | Q8TAQ5-2     | ZNF420    | Isoform 2 of Zinc finger protein 420                                          |
|                 |              |              | 1.008        | 1.025        | 0.948        |              |              |              |               |               |               | Q96K58-2     | ZNF668    | Isoform 2 of Zinc finger protein 668                                          |
| 1.025           | 1.086        | 1.006        | 1.099        | 1.065        | 1.056        | 0.930        | 0.712        | 0.988        |               |               |               | P17097-2     | ZNF7      | Isoform 2 of Zinc finger protein 7                                            |
| 0.960           | 1.043        | 0.881        |              |              |              |              |              |              |               |               |               | Q9UHF7-2     | TRPS1     | Isoform 2 of Zinc finger transcription factor Trps1                           |
| 1.071           | 1.111        | 1.018        | 0.944        | 0.841        | 0.972        | 0.775        | 1.025        | 0.901        | 1.084         | 0.937         | 1.003         | Q6NXT4-2     | SLC30A6   | Isoform 2 of Zinc transporter 6                                               |
|                 |              |              |              |              |              | 0.983        | 1.206        | 1.291        | 0.904         | 1.011         | 1.008         | O15527-4     | OGG1      | Isoform 2A of N-glycosylase/DNA lyase                                         |
| 0.962           | 0.992        | 0.998        | 0.985        | 0.959        | 1.006        | 1.009        | 0.986        | 0.947        | 1.023         | 0.993         | 1.027         | Q13409-2     | DYNC1I2   | Isoform 2B of Cytoplasmic dynein 1 intermediate chain 2                       |
| 0.992           | 0.970        | 0.954        | 1.004        | 0.988        | 0.952        | 1.001        | 1.046        | 0.980        | 1.003         | 1.001         | 0.981         | P01116-2     | KRAS      | Isoform 2B of GTPase KRas                                                     |
| 1.118           | 0.970        | 1.009        | 1.070        | 0.923        | 1.006        | 1.123        | 1.077        | 1.028        | 1.128         | 0.998         | 1.045         | Q9NRZ7-3     | AGPAT3    | Isoform 3 of 1-acyl-sn-glycerol-3-phosphate acyltransferase gamma             |
| 0.996           | 1.014        | 1.007        | 0.996        | 0.949        | 0.967        | 1.048        | 1.070        | 1.050        | 0.967         | 1.013         | 1.033         | Q15147-4     | PLCB4     | Isoform 3 of 1-phosphatidylinositol 4,5-bisphosphate phosphodiesterase beta-4 |
| 0.919           | 0.890        | 1.309        |              |              |              |              |              |              |               |               |               | P04035-3     | HMGCR     | Isoform 3 of 3-hydroxy-3-methylglutaryl-coenzyme A reductase                  |
| 0.996           | 1.019        | 0.988        | 0.998        | 0.987        | 1.006        | 0.969        | 1.008        | 0.970        | 0.982         | 1.028         | 0.949         | P18621-3     | RPL17     | Isoform 3 of 60S ribosomal protein L17                                        |
|                 |              |              | 0.902        | 0.898        | 1.008        | 0.987        | 1.037        | 0.790        |               |               |               | Q9BTT0-3     | ANP32E    | Isoform 3 of Acidic leucine-rich nuclear phosphoprotein 32 family member E    |
| 0.976           | 0.999        | 1.008        | 0.977        | 0.964        | 0.990        | 0.990        | 1.034        | 1.004        | 0.973         | 0.998         | 1.023         | P59998-3     | ARPC4     | Isoform 3 of Actin-related protein 2/3 complex subunit 4                      |
| 0.996           | 0.977        | 1.010        | 1.001        | 0.927        | 0.974        | 0.921        | 1.064        | 1.156        | 0.829         | 1.026         | 1.018         | Q6VMQ6-4     | ATF7IP    | Isoform 3 of Activating transcription factor 7-interacting protein 1          |
| 1.017           | 1.006        | 1.035        | 0.988        | 0.921        | 0.995        | 0.967        | 0.966        | 0.977        | 0.946         | 0.995         | 1.053         | Q5T8D3-3     | ACBD5     | Isoform 3 of Acyl-CoA-binding domain-containing protein 5                     |
| 1.094           | 1.005        | 1.064        | 1.104        | 0.820        | 1.013        | 1.000        | 1.126        | 1.172        | 1.211         | 1.146         | 1.081         | Q6UY14-3     | ADAMTSL4  | Isoform 3 of ADAMTS-like protein 4                                            |
| 0.993           | 1.000        | 0.981        | 1.046        | 1.020        | 1.023        | 1.062        | 1.100        | 1.053        | 1.027         | 0.963         | 1.125         | Q86SQ4-3     | ADGRG6    | Isoform 3 of Adhesion G-protein coupled receptor G6                           |
|                 |              |              |              |              |              |              |              |              | 1.071         | 0.953         | 1.010         | Q66PJ3-3     | ARL6IP4   | Isoform 3 of ADP-ribosylation factor-like protein 6-interacting protein 4     |
| 1.006           | 1.006        | 0.982        | 1.012        | 0.982        | 1.043        | 1.039        | 1.175        | 1.079        | 1.027         | 1.020         | 1.052         | Q9BTE6-3     | AARSD1    | Isoform 3 of Alanyl-tRNA editing protein Aarsd1                               |
| 1.037           | 0.970        | 0.948        | 1.254        | 1.212        | 1.225        | 1.063        | 0.817        | 0.682        | 0.991         | 1.147         | 1.026         | Q6UW56-3     | ATRAID    | Isoform 3 of All-trans retinoic acid-induced differentiation factor           |

| Abundance Ratio |              |              |              |              |              |              |              |              |               |               |               | Accession ID | Gene name | Protein Description                                                                     |
|-----------------|--------------|--------------|--------------|--------------|--------------|--------------|--------------|--------------|---------------|---------------|---------------|--------------|-----------|-----------------------------------------------------------------------------------------|
| 1 d<br>M1/C1    | 1 d<br>M2/C2 | 1 d<br>M3/C3 | 4 d<br>M1/C1 | 4 d<br>M2/C2 | 4 d<br>M3/C3 | 7 d<br>M1/C1 | 7 d<br>M2/C2 | 7 d<br>M3/C3 | 10 d<br>M1/C1 | 10 d<br>M2/C2 | 10 d<br>M3/C3 |              |           |                                                                                         |
| 0.990           | 1.007        | 1.016        | 0.890        | 0.754        | 0.901        | 0.945        | 0.954        | 0.898        | 1.095         | 0.912         | 1.036         | Q9UQ53-3     | MGAT4B    | Isoform 3 of Alpha-1,3-mannosyl-glycoprotein 4-beta-N-acetylglucosaminyltransferase B   |
| 1.034           | 1.025        | 1.029        | 1.007        | 0.999        | 1.012        | 1.005        | 0.937        | 1.056        | 1.083         | 0.980         | 1.070         | P35611-3     | ADD1      | Isoform 3 of Alpha-adducin                                                              |
| 1.004           | 1.063        | 1.046        | 0.965        | 0.918        | 1.011        | 1.058        | 1.157        | 0.997        | 0.934         | 0.986         | 1.038         | Q9UJX5-3     | ANAPC4    | Isoform 3 of Anaphase-promoting complex subunit 4                                       |
| 1.017           | 0.895        | 1.010        |              |              |              |              |              |              |               |               |               | Q68DC2-4     | ANKS6     | Isoform 3 of Ankyrin repeat and SAM domain-containing protein 6                         |
| 1.042           | 1.141        | 0.846        | 1.009        | 0.872        | 1.215        | 0.923        | 1.147        | 1.058        | 1.006         | 0.916         | 0.943         | Q9Y575-3     | ASB3      | Isoform 3 of Ankyrin repeat and SOCS box protein 3                                      |
| 0.942           | 1.233        | 1.197        | 0.811        | 1.055        | 1.097        | 1.015        | 1.196        | 1.153        |               |               |               | Q6ZTN6-3     | ANKRD13D  | Isoform 3 of Ankyrin repeat domain-containing protein 13D                               |
| 1.051           | 1.114        | 0.987        | 0.998        | 0.963        | 1.002        | 1.000        | 1.122        | 0.999        | 0.983         | 0.989         | 1.018         | Q13625-3     | TP53BP2   | Isoform 3 of Apoptosis-stimulating of p53 protein 2                                     |
| 1.007           | 1.012        | 1.024        | 1.004        | 1.006        | 1.024        | 0.992        | 1.036        | 0.981        | 1.007         | 1.031         | 1.056         | Q9Y2X7-3     | GIT1      | Isoform 3 of ARF GTPase-activating protein GIT1                                         |
| 1.022           | 1.004        | 1.030        | 1.014        | 0.952        | 1.025        | 1.025        | 1.009        | 1.019        | 1.014         | 0.939         | 1.038         | Q96P48-3     | ARAP1     | Isoform 3 of Arf-GAP with Rho-GAP domain, ANK repeat and PH domain-containing protein 1 |
| 0.989           | 1.004        | 0.987        | 0.994        | 0.975        | 1.004        | 0.995        | 1.075        | 1.005        | 1.004         | 0.989         | 1.008         | P08237-3     | PFKM      | Isoform 3 of ATP-dependent 6-phosphofructokinase, muscle type                           |
| 1.073           | 0.989        | 1.024        | 1.020        | 0.898        | 0.999        | 1.042        | 0.992        | 1.006        | 1.077         | 1.027         | 1.044         | Q8NFD5-3     | ARID1B    | Isoform 3 of AT-rich interactive domain-containing protein 1B                           |
| 1.016           | 1.076        | 1.014        | 1.062        | 0.969        | 0.981        | 1.005        | 1.126        | 1.026        | 1.042         | 1.112         | 0.973         | Q8NFI9-2     | BBS1      | Isoform 3 of Bardet-Biedl syndrome 1 protein                                            |
| 1.000           | 0.983        | 1.004        | 0.952        | 0.943        | 1.000        | 0.953        | 0.965        | 0.951        | 0.947         | 0.973         | 0.948         | Q7L1Q6-3     | BZW1      | Isoform 3 of Basic leucine zipper and W2 domain-containing protein 1                    |
| 0.986           | 0.975        | 0.976        | 0.972        | 0.933        | 1.001        | 1.015        | 0.979        | 0.990        | 1.023         | 1.018         | 1.013         | Q92843-2     | BCL2L2    | Isoform 3 of Bcl-2-like protein 2                                                       |
|                 |              |              |              |              |              | 1.174        | 1.151        | 0.899        | 1.200         | 1.015         | 1.035         | Q5H9F3-3     | BCORL1    | Isoform 3 of BCL-6 corepressor-like protein 1                                           |
| 1.000           | 0.987        | 0.980        | 1.031        | 0.934        | 0.924        | 0.992        | 1.113        | 1.032        | 0.988         | 0.972         | 0.993         | Q6NYC1-3     | JMJD6     | Isoform 3 of Bifunctional arginine demethylase and lysyl-hydroxylase JMJD6              |
| 1.058           | 0.956        | 1.061        | 0.952        | 0.918        | 0.970        | 0.934        | 1.227        | 1.112        | 0.915         | 0.822         | 0.925         | Q8TDM0-3     | BCAS4     | Isoform 3 of Breast carcinoma-amplified sequence 4                                      |
| 1.020           | 0.985        | 1.008        | 0.962        | 0.964        | 1.010        | 1.008        | 1.038        | 1.045        | 1.043         | 0.993         | 1.032         | Q86YS7-3     | C2CD5     | Isoform 3 of C2 domain-containing protein 5                                             |
| 1.002           | 0.933        | 1.043        |              |              |              |              |              |              | 1.079         | 1.004         | 1.109         | Q6KCM7-3     | SLC25A25  | Isoform 3 of Calcium-binding mitochondrial carrier protein SCA25-2                      |
| 0.985           | 1.001        | 1.060        | 1.032        | 0.912        | 1.008        | 1.047        | 1.083        | 1.044        | 1.081         | 1.061         | 1.080         | P98194-3     | ATP2C1    | Isoform 3 of Calcium-transporting ATPase type 2C member 1                               |
|                 |              |              | 1.153        | 1.030        | 1.185        | 0.877        | 0.795        | 0.987        | 1.097         | 1.008         | 1.340         | Q05682-3     | CALD1     | Isoform 3 of Caldesmon                                                                  |
| 0.990           | 0.975        | 1.012        | 0.982        | 0.990        | 1.046        | 1.023        | 1.031        | 0.984        | 1.039         | 1.057         | 1.067         | Q5T5Y3-3     | CAMSAP1   | Isoform 3 of Calmodulin-regulated spectrin-associated protein 1                         |
| 0.985           | 1.016        | 0.978        | 0.990        | 0.976        | 0.991        | 0.955        | 1.013        | 0.983        | 0.962         | 0.992         | 0.972         | O43852-3     | CALU      | Isoform 3 of Calumenin                                                                  |

| Abundance Ratio |              |              |              |              |              |              |              |              |               |               |               | Accession ID | Gene name | Protein Description                                                    |
|-----------------|--------------|--------------|--------------|--------------|--------------|--------------|--------------|--------------|---------------|---------------|---------------|--------------|-----------|------------------------------------------------------------------------|
| 1 d<br>M1/C1    | 1 d<br>M2/C2 | 1 d<br>M3/C3 | 4 d<br>M1/C1 | 4 d<br>M2/C2 | 4 d<br>M3/C3 | 7 d<br>M1/C1 | 7 d<br>M2/C2 | 7 d<br>M3/C3 | 10 d<br>M1/C1 | 10 d<br>M2/C2 | 10 d<br>M3/C3 |              |           |                                                                        |
| 0.969           | 0.996        | 1.010        | 0.995        | 0.960        | 1.029        | 1.007        | 1.016        | 1.023        | 1.036         | 1.000         | 1.066         | P30622-2     | CLIP1     | Isoform 3 of CAP-Gly domain-containing linker protein 1                |
| 0.896           | 0.886        | 1.070        | 0.936        | 0.827        | 1.035        | 1.015        | 1.022        | 0.955        | 0.983         | 0.946         | 1.107         | P31327-3     | CPS1      | Isoform 3 of Carbamoyl-phosphate synthase [ammonia], mitochondrial     |
|                 |              |              | 1.057        | 0.875        | 1.224        |              |              |              |               |               |               | P48729-3     | CSNK1A1   | Isoform 3 of Casein kinase I isoform alpha                             |
| 1.016           | 0.993        | 1.022        | 0.973        | 0.938        | 1.059        | 1.031        | 1.045        | 1.007        | 1.017         | 1.008         | 1.058         | Q96S26-3     | CDK5RAP1  | Isoform 3 of CDK5 regulatory subunit-associated protein 1              |
| 0.863           | 1.055        | 1.068        |              |              |              | 1.112        | 1.016        | 1.006        |               |               |               | O75419-3     | CDC45     | Isoform 3 of Cell division control protein 45 homolog                  |
| 0.990           | 1.062        | 0.973        |              |              |              | 1.004        | 1.136        | 1.023        |               |               |               | Q96H22-3     | CENPN     | Isoform 3 of Centromere protein N                                      |
| 1.087           | 1.018        | 1.134        | 0.910        | 0.923        | 1.022        | 0.844        | 1.056        | 0.689        | 0.981         | 0.901         | 0.955         | Q8TEP8-3     | CEP192    | Isoform 3 of Centrosomal protein of 192 kDa                            |
| 1.018           | 0.966        | 0.992        | 0.986        | 0.970        | 1.054        | 1.022        | 1.094        | 1.048        | 0.980         | 1.079         | 0.986         | Q8IXM2-3     | BAP18     | Isoform 3 of Chromatin complexes subunit BAP18                         |
| 1.069           | 0.948        | 1.019        | 1.015        | 0.965        | 0.940        | 0.953        | 0.891        | 0.966        | 1.424         | 0.711         | 0.968         | Q9HAF1-3     | MEAF6     | Isoform 3 of Chromatin modification-related protein MEAF6              |
| 0.996           | 0.984        | 0.980        | 1.004        | 0.984        | 1.019        | 1.036        | 1.071        | 1.045        | 1.015         | 0.983         | 1.042         | Q12873-3     | CHD3      | Isoform 3 of Chromodomain-helicase-DNA-binding protein 3               |
| 1.045           | 1.006        | 1.015        | 1.020        | 0.999        | 0.988        | 1.014        | 1.009        | 0.983        | 1.004         | 0.996         | 1.001         | Q8N684-3     | CPSF7     | Isoform 3 of Cleavage and polyadenylation specificity factor subunit 7 |
| 0.995           | 0.978        | 1.019        | 0.985        | 0.963        | 0.987        | 1.008        | 1.002        | 1.008        | 0.992         | 1.042         | 1.041         | O75122-3     | CLASP2    | Isoform 3 of CLIP-associating protein 2                                |
| 1.041           | 1.021        | 1.004        | 1.021        | 1.013        | 1.022        | 1.047        | 0.997        | 1.027        | 1.075         | 1.003         | 1.086         | Q9Y5P4-3     | COL4A3BP  | Isoform 3 of Collagen type IV alpha-3-binding protein                  |
| 0.968           | 0.992        | 0.968        | 0.984        | 1.065        | 0.974        | 0.998        | 0.965        | 0.998        | 0.987         | 1.003         | 0.992         | Q9ULV4-3     | CORO1C    | Isoform 3 of Coronin-1C                                                |
| 1.048           | 1.005        | 1.002        | 1.001        | 0.963        | 0.992        | 1.028        | 0.971        | 0.963        | 1.031         | 0.993         | 1.034         | P57737-3     | CORO7     | Isoform 3 of Coronin-7                                                 |
| 1.131           | 1.094        | 0.982        | 0.987        | 0.986        | 0.949        | 1.032        | 1.147        | 0.998        | 0.974         | 1.007         | 0.988         | Q9BW66-3     | CINP      | Isoform 3 of Cyclin-dependent kinase 2-interacting protein             |
| 1.094           | 1.029        | 1.008        | 1.006        | 0.975        | 1.086        | 0.998        | 1.007        | 1.014        | 0.925         | 0.913         | 0.989         | Q9Y600-3     | CSAD      | Isoform 3 of Cysteine sulfinic acid decarboxylase                      |
| 0.999           | 1.011        | 1.028        | 1.001        | 0.985        | 1.007        | 0.973        | 1.070        | 1.027        | 0.963         | 0.996         | 0.990         | P49589-3     | CARS      | Isoform 3 of Cysteine--tRNA ligase, cytoplasmic                        |
| 1.027           | 1.007        | 1.004        | 0.984        | 0.984        | 1.039        | 0.993        | 1.068        | 1.043        | 1.060         | 1.024         | 1.059         | Q8NEU8-3     | APPL2     | Isoform 3 of DCC-interacting protein 13-beta                           |
| 1.232           | 0.960        | 1.107        | 1.092        | 0.910        | 1.182        | 1.129        | 0.988        | 1.159        | 0.822         | 1.021         | 1.052         | Q92564-3     | DCUN1D4   | Isoform 3 of DCN1-like protein 4                                       |
| 1.012           | 1.004        | 1.055        | 1.011        | 0.898        | 1.005        | 0.898        | 1.032        | 0.989        | 1.028         | 0.998         | 1.002         | Q58WW2-3     | DCAF6     | Isoform 3 of DDB1- and CUL4-associated factor 6                        |
|                 |              |              | 0.628        | 0.553        | 1.082        |              |              |              |               |               |               | P53355-3     | DAPK1     | Isoform 3 of Death-associated protein kinase 1                         |
| 0.963           | 0.990        | 1.010        | 1.018        | 1.084        | 0.985        | 0.987        | 1.071        | 1.042        | 1.018         | 0.953         | 1.037         | Q8TDJ6-3     | DMXL2     | Isoform 3 of DmX-like protein 2                                        |
| 0.904           | 0.943        | 1.196        |              |              |              | 1.081        | 0.873        | 1.193        |               |               |               | P18858-3     | LIG1      | Isoform 3 of DNA ligase 1                                              |
| 1.008           | 0.979        | 1.061        | 0.992        | 1.015        | 1.036        | 0.990        | 1.025        | 1.008        | 0.969         | 0.998         | 1.019         | Q9H9Y6-3     | POLR1B    | Isoform 3 of DNA-directed RNA polymerase I subunit RPA2                |
| 0.986           | 0.974        | 1.038        | 1.005        | 0.985        | 1.070        | 0.996        | 1.019        | 1.011        | 1.037         | 1.024         | 1.128         | Q5F1R6-3     | DNAJC21   | Isoform 3 of DnaJ homolog subfamily C member 21                        |

| Abundance Ratio |              |              |              |              |              |              |              |              |               |               |               | Accession ID | Gene name | Protein Description                                                                  |
|-----------------|--------------|--------------|--------------|--------------|--------------|--------------|--------------|--------------|---------------|---------------|---------------|--------------|-----------|--------------------------------------------------------------------------------------|
| 1 d<br>M1/C1    | 1 d<br>M2/C2 | 1 d<br>M3/C3 | 4 d<br>M1/C1 | 4 d<br>M2/C2 | 4 d<br>M3/C3 | 7 d<br>M1/C1 | 7 d<br>M2/C2 | 7 d<br>M3/C3 | 10 d<br>M1/C1 | 10 d<br>M2/C2 | 10 d<br>M3/C3 |              |           |                                                                                      |
| 0.996           | 0.987        | 1.004        | 0.988        | 1.005        | 1.022        | 0.995        | 0.961        | 1.000        | 1.013         | 1.008         | 1.028         | P49959-3     | MRE11     | Isoform 3 of Double-strand break repair protein MRE11                                |
|                 |              |              |              |              |              |              |              |              | 0.999         | 1.105         | 1.064         | O95793-3     | STAU1     | Isoform 3 of Double-stranded RNA-binding protein<br>Staufen homolog 1                |
| 0.959           | 0.969        | 1.006        | 0.986        | 1.014        | 0.974        | 0.990        | 0.938        | 0.977        | 1.018         | 0.983         | 1.034         | Q16643-3     | DBN1      | Isoform 3 of Drebrin                                                                 |
| 1.104           | 1.049        | 1.009        | 1.000        | 0.934        | 0.996        | 1.073        | 0.996        | 1.021        | 1.115         | 1.040         | 1.051         | O14733-3     | MAP2K7    | Isoform 3 of Dual specificity mitogen-activated protein<br>kinase kinase 7           |
| 0.874           | 0.920        | 0.939        | 1.088        | 0.947        | 1.130        | 1.030        | 1.099        | 0.986        | 0.962         | 0.976         | 0.985         | P49759-3     | CLK1      | Isoform 3 of Dual specificity protein kinase CLK1                                    |
| 1.089           | 0.865        | 1.095        | 0.755        | 0.974        | 0.929        | 0.931        | 0.945        | 1.002        | 1.050         | 0.917         | 1.287         | Q9H9R9-3     | DBNDD1    | Isoform 3 of Dysbindin domain-containing protein 1                                   |
| 1.039           | 0.992        | 1.015        | 1.017        | 0.973        | 1.057        | 0.992        | 1.018        | 1.028        | 0.948         | 0.990         | 1.016         | O94822-3     | LTN1      | Isoform 3 of E3 ubiquitin-protein ligase listerin                                    |
|                 |              |              | 0.998        | 0.986        | 0.944        |              |              |              |               |               |               | O60858-3     | TRIM13    | Isoform 3 of E3 ubiquitin-protein ligase TRIM13                                      |
| 1.001           | 1.010        | 1.027        | 0.988        | 0.989        | 0.994        | 0.985        | 1.040        | 1.019        | 0.941         | 0.925         | 1.056         | Q14669-3     | TRIP12    | Isoform 3 of E3 ubiquitin-protein ligase TRIP12                                      |
| 0.974           | 0.939        | 1.097        | 1.038        | 0.993        | 1.148        | 0.962        | 1.129        | 1.120        | 1.011         | 1.001         | 1.007         | O94874-3     | UFL1      | Isoform 3 of E3 UFM1-protein ligase 1                                                |
| 1.034           | 1.035        | 1.012        | 1.030        | 1.008        | 1.018        | 1.041        | 0.954        | 0.998        | 1.000         | 0.971         | 0.998         | O95834-3     | EML2      | Isoform 3 of Echinoderm microtubule-associated<br>protein-like 2                     |
| 1.042           | 0.964        | 1.023        | 1.001        | 0.996        | 1.020        | 1.039        | 0.998        | 1.095        | 1.106         | 1.058         | 1.124         | Q99447-3     | PCYT2     | Isoform 3 of Ethanolamine-phosphate<br>cytidyltransferase                            |
| 1.006           | 0.999        | 1.015        | 0.996        | 1.006        | 0.969        | 0.987        | 0.964        | 0.976        | 0.971         | 0.918         | 0.986         | P15170-3     | GSPT1     | Isoform 3 of Eukaryotic peptide chain release factor<br>GTP-binding subunit ERF3A    |
| 1.147           | 0.796        | 1.221        | 0.943        | 0.872        | 1.001        | 0.999        | 0.986        | 1.058        | 1.076         | 0.984         | 1.055         | Q9NRA8-3     | EIF4ENIF1 | Isoform 3 of Eukaryotic translation initiation factor 4E<br>transporter              |
| 1.002           | 1.053        | 0.979        | 1.061        | 0.977        | 0.961        | 1.069        | 1.156        | 0.896        | 0.914         | 0.922         | 0.988         | Q93063-3     | EXT2      | Isoform 3 of Exostosin-2                                                             |
| 1.006           | 1.014        | 1.024        | 1.022        | 1.055        | 0.989        | 1.035        | 1.014        | 1.005        | 0.982         | 0.972         | 0.992         | Q96AC1-3     | FERMT2    | Isoform 3 of Fermitin family homolog 2                                               |
| 1.109           | 1.075        | 1.017        | 0.990        | 0.872        | 1.118        | 0.961        | 1.107        | 0.975        | 1.020         | 0.952         | 0.971         | O95466-3     | FMNL1     | Isoform 3 of Formin-like protein 1                                                   |
| 0.979           | 1.013        | 1.071        | 1.016        | 1.040        | 1.059        | 1.023        | 1.020        | 1.056        | 1.071         | 1.036         | 1.129         | Q5T3I0-3     | GPATCH4   | Isoform 3 of G patch domain-containing protein 4                                     |
| 1.023           | 1.032        | 1.013        | 1.053        | 0.955        | 1.014        | 1.041        | 1.083        | 1.007        | 1.001         | 1.008         | 1.030         | Q9BSJ2-4     | TUBGCP2   | Isoform 3 of Gamma-tubulin complex component 2                                       |
| 1.061           | 1.033        | 0.996        | 1.033        | 0.988        | 1.010        | 1.098        | 1.044        | 1.030        | 1.051         | 1.024         | 1.091         | Q9Y5Q8-3     | GTF3C5    | Isoform 3 of General transcription factor 3C<br>polypeptide 5                        |
| 1.084           | 1.043        | 1.121        | 1.159        | 1.122        | 1.161        | 1.144        | 1.213        | 1.102        | 1.074         | 1.074         | 1.171         | P07093-3     | SERPINE2  | Isoform 3 of Glia-derived nexin                                                      |
| 0.938           | 1.005        | 0.976        | 0.959        | 0.897        | 0.930        | 0.977        | 0.881        | 0.920        | 0.975         | 0.790         | 0.953         | O94925-3     | GLS       | Isoform 3 of Glutaminase kidney isoform,<br>mitochondrial                            |
| 0.973           | 0.995        | 0.987        | 0.973        | 0.944        | 1.001        | 0.974        | 0.986        | 1.017        | 1.010         | 0.974         | 1.003         | Q14451-3     | GRB7      | Isoform 3 of Growth factor receptor-bound protein 7                                  |
| 0.978           | 0.963        | 1.031        | 1.094        | 1.019        | 1.125        | 1.038        | 1.302        | 1.038        | 0.937         | 0.963         | 1.045         | Q92963-3     | RIT1      | Isoform 3 of GTP-binding protein Rit1                                                |
|                 |              |              | 0.895        | 0.978        | 1.034        |              |              |              |               |               |               | P63092-3     | GNAS      | Isoform 3 of Guanine nucleotide-binding protein G(s)<br>subunit alpha isoforms short |

| Abundance Ratio |              |              |              |              |              |              |              |              |               |               |               | Accession ID | Gene name | Protein Description                                                          |
|-----------------|--------------|--------------|--------------|--------------|--------------|--------------|--------------|--------------|---------------|---------------|---------------|--------------|-----------|------------------------------------------------------------------------------|
| 1 d<br>M1/C1    | 1 d<br>M2/C2 | 1 d<br>M3/C3 | 4 d<br>M1/C1 | 4 d<br>M2/C2 | 4 d<br>M3/C3 | 7 d<br>M1/C1 | 7 d<br>M2/C2 | 7 d<br>M3/C3 | 10 d<br>M1/C1 | 10 d<br>M2/C2 | 10 d<br>M3/C3 |              |           |                                                                              |
| 0.990           | 0.996        | 1.005        | 0.968        | 0.962        | 0.961        | 1.002        | 0.931        | 0.939        | 1.026         | 0.953         | 1.061         | Q9H910-3     | HN1L      | Isoform 3 of Hematological and neurological expressed 1-like protein         |
| 1.020           | 1.010        | 0.986        | 0.973        | 0.978        | 1.006        | 0.916        | 0.909        | 0.949        | 0.961         | 0.984         | 0.921         | Q99729-3     | HNRNPAB   | Isoform 3 of Heterogeneous nuclear ribonucleoprotein A/B                     |
| 1.050           | 0.996        | 1.019        | 0.988        | 1.190        | 0.984        | 0.969        | 0.860        | 1.059        | 0.943         | 0.930         | 0.943         | Q14103-3     | HNRNPD    | Isoform 3 of Heterogeneous nuclear ribonucleoprotein D0                      |
| 1.000           | 1.064        | 1.008        | 1.026        | 1.032        | 0.938        | 1.020        | 1.050        | 1.023        | 0.980         | 0.938         | 0.955         | P61978-3     | HNRNPK    | Isoform 3 of Heterogeneous nuclear ribonucleoprotein K                       |
| 0.927           | 1.015        | 1.223        | 0.984        | 0.842        | 1.123        | 0.916        | 1.021        | 1.159        | 1.070         | 1.004         | 1.026         | O60506-3     | SYNCRIP   | Isoform 3 of Heterogeneous nuclear ribonucleoprotein Q                       |
| 0.948           | 0.991        | 1.011        | 0.964        | 0.982        | 1.006        | 0.961        | 0.899        | 0.968        | 1.005         | 0.952         | 1.034         | P19367-3     | HK1       | Isoform 3 of Hexokinase-1                                                    |
| 0.963           | 0.904        | 1.218        | 1.018        | 0.930        | 1.067        | 0.923        | 1.049        | 1.340        | 1.013         | 0.884         | 1.371         | Q92993-3     | KAT5      | Isoform 3 of Histone acetyltransferase KAT5                                  |
| 1.208           | 1.058        | 0.873        | 0.945        | 1.014        | 1.101        | 0.956        | 1.125        | 1.055        | 1.026         | 0.828         | 0.823         | Q9UQL6-3     | HDAC5     | Isoform 3 of Histone deacetylase 5                                           |
| 1.023           | 1.013        | 0.972        | 1.030        | 0.966        | 1.003        | 0.994        | 0.959        | 1.009        | 1.078         | 1.007         | 1.080         | Q9H0E3-3     | SAP130    | Isoform 3 of Histone deacetylase complex subunit SAP130                      |
| 1.015           | 0.987        | 1.035        | 0.972        | 0.960        | 1.013        | 1.032        | 0.977        | 0.987        | 1.017         | 1.043         | 1.036         | Q03164-3     | KMT2A     | Isoform 3 of Histone-lysine N-methyltransferase 2A                           |
| 1.062           | 0.792        | 0.847        | 1.067        | 0.958        | 0.979        | 1.008        | 1.134        | 1.063        | 1.123         | 0.946         | 1.056         | O14686-3     | KMT2D     | Isoform 3 of Histone-lysine N-methyltransferase 2D                           |
| 1.135           | 1.075        | 1.077        | 0.988        | 1.472        | 0.823        | 0.975        | 1.006        | 1.035        | 0.858         | 1.123         | 0.868         | P39880-3     | CUX1      | Isoform 3 of Homeobox protein cut-like 1                                     |
| 0.980           | 1.018        | 1.001        | 0.994        | 1.041        | 1.028        | 1.010        | 1.000        | 1.038        | 0.972         | 0.999         | 1.018         | Q9NZL4-3     | HSPBP1    | Isoform 3 of Hsp70-binding protein 1                                         |
| 0.922           | 0.947        | 1.038        |              |              |              | 0.947        | 1.080        | 0.937        | 0.974         | 0.872         | 1.031         | O75330-3     | HMMR      | Isoform 3 of Hyaluronan mediated motility receptor                           |
| 1.043           | 1.015        | 1.013        | 1.038        | 0.977        | 1.026        | 0.966        | 1.124        | 1.005        | 0.981         | 0.972         | 0.997         | Q9BYI3-3     | FAM126A   | Isoform 3 of Hyccin                                                          |
| 0.988           | 1.006        | 1.009        | 1.000        | 1.028        | 1.022        | 1.009        | 1.038        | 1.040        | 0.965         | 0.999         | 0.993         | O00410-3     | IPO5      | Isoform 3 of Importin-5                                                      |
|                 |              |              | 0.895        | 0.967        | 0.889        | 1.055        | 1.195        | 0.857        | 1.175         | 1.181         | 1.048         | Q6PI98-4     | INO80C    | Isoform 3 of INO80 complex subunit C                                         |
| 1.019           | 0.986        | 1.025        | 0.966        | 1.033        | 0.963        | 0.964        | 1.004        | 1.000        | 0.970         | 1.009         | 1.001         | P29218-3     | IMPA1     | Isoform 3 of Inositol monophosphatase 1                                      |
| 1.055           | 1.023        | 1.024        | 0.991        | 1.064        | 1.031        | 0.884        | 0.978        | 0.997        | 1.030         | 1.033         | 0.974         | P01344-3     | IGF2      | Isoform 3 of Insulin-like growth factor II                                   |
| 1.033           | 1.009        | 1.032        | 1.006        | 0.977        | 1.028        | 1.022        | 1.095        | 0.974        | 1.018         | 1.000         | 1.042         | Q6P597-3     | KLC3      | Isoform 3 of Kinesin light chain 3                                           |
| 1.076           | 0.978        | 1.047        | 1.009        | 0.843        | 1.029        | 1.008        | 0.927        | 0.982        | 1.045         | 1.023         | 1.001         | Q9NSK0-3     | KLC4      | Isoform 3 of Kinesin light chain 4                                           |
| 1.020           | 0.972        | 1.055        | 0.937        | 0.936        | 1.102        | 1.014        | 1.024        | 1.008        | 0.972         | 1.061         | 1.086         | Q9H1H9-3     | KIF13A    | Isoform 3 of Kinesin-like protein KIF13A                                     |
| 0.953           | 0.992        | 1.069        | 0.981        | 0.947        | 1.022        | 1.002        | 1.028        | 1.012        | 1.002         | 0.913         | 1.027         | O60333-3     | KIF1B     | Isoform 3 of Kinesin-like protein KIF1B                                      |
| 1.032           | 1.009        | 1.004        | 1.025        | 0.988        | 1.017        | 1.054        | 1.026        | 1.010        | 1.066         | 1.029         | 1.062         | Q4G0J3-3     | LARP7     | Isoform 3 of La-related protein 7                                            |
| 0.998           | 1.024        | 1.021        | 0.984        | 0.940        | 1.012        | 1.027        | 1.052        | 1.004        | 0.982         | 0.965         | 1.053         | P46379-3     | BAG6      | Isoform 3 of Large proline-rich protein BAG6                                 |
| 0.955           | 0.998        | 0.988        | 0.991        | 0.983        | 1.008        | 1.008        | 0.935        | 0.986        | 1.045         | 0.983         | 1.068         | Q32MZ4-3     | LRRFIP1   | Isoform 3 of Leucine-rich repeat flightless-interacting protein 1            |
| 1.061           | 0.973        | 1.040        | 1.008        | 1.027        | 1.017        | 1.072        | 0.880        | 1.003        | 0.995         | 0.955         | 1.030         | P48059-3     | LIMS1     | Isoform 3 of LIM and senescent cell antigen-like-containing domain protein 1 |



| Abundance Ratio |              |              |              |              |              |              |              |              |               |               |               | Accession ID | Gene name | Protein Description                                                       |
|-----------------|--------------|--------------|--------------|--------------|--------------|--------------|--------------|--------------|---------------|---------------|---------------|--------------|-----------|---------------------------------------------------------------------------|
| 1 d<br>M1/C1    | 1 d<br>M2/C2 | 1 d<br>M3/C3 | 4 d<br>M1/C1 | 4 d<br>M2/C2 | 4 d<br>M3/C3 | 7 d<br>M1/C1 | 7 d<br>M2/C2 | 7 d<br>M3/C3 | 10 d<br>M1/C1 | 10 d<br>M2/C2 | 10 d<br>M3/C3 |              |           |                                                                           |
| 1.160           | 0.894        | 0.764        | 0.975        | 0.912        | 0.895        | 0.998        | 1.356        | 1.054        | 0.980         | 0.907         | 0.966         | P53671-3     | LIMK2     | Isoform 3 of LIM domain kinase 2                                          |
| 0.987           | 1.121        | 0.984        |              |              |              |              |              |              |               |               |               | Q8WWI1-3     | LMO7      | Isoform 3 of LIM domain only protein 7                                    |
| 1.051           | 1.011        | 1.024        | 1.022        | 1.074        | 1.017        | 0.998        | 0.990        | 1.007        | 0.998         | 0.978         | 0.981         | P00338-3     | LDHA      | Isoform 3 of L-lactate dehydrogenase A chain                              |
|                 |              |              | 0.880        | 0.817        | 0.901        | 0.894        | 1.171        | 1.005        | 0.927         | 0.831         | 1.031         | Q6NUT3-3     | MFSD12    | Isoform 3 of Major facilitator superfamily domain-containing protein 12   |
| 1.009           | 0.988        | 1.007        | 1.006        | 1.082        | 0.975        | 0.998        | 0.934        | 0.990        | 1.013         | 0.974         | 0.984         | P40925-3     | MDH1      | Isoform 3 of Malate dehydrogenase, cytoplasmic                            |
| 0.953           | 1.012        | 0.987        | 1.091        | 1.103        | 1.103        | 1.019        | 1.070        | 1.013        | 1.032         | 1.069         | 1.052         | Q9ULC4-3     | MCTS1     | Isoform 3 of Malignant T-cell-amplified sequence 1                        |
| 1.001           | 1.033        | 1.022        | 0.986        | 0.969        | 1.003        | 0.998        | 1.023        | 1.075        | 1.009         | 0.995         | 1.049         | Q9Y2X0-3     | MED16     | Isoform 3 of Mediator of RNA polymerase II transcription subunit 16       |
| 0.989           | 1.082        | 1.071        | 1.078        | 1.035        | 0.977        | 0.990        | 1.060        | 1.108        | 1.096         | 1.046         | 1.083         | Q71SY5-3     | MED25     | Isoform 3 of Mediator of RNA polymerase II transcription subunit 25       |
| 1.076           | 1.016        | 0.981        | 0.986        | 0.984        | 1.047        | 1.006        | 0.931        | 1.079        | 1.032         | 1.006         | 1.067         | Q2M296-3     | MTHFSD    | Isoform 3 of Methenyltetrahydrofolate synthase domain-containing protein  |
| 1.049           | 1.017        | 1.038        | 1.045        | 0.993        | 1.067        | 1.085        | 1.007        | 0.933        | 1.071         | 1.037         | 1.076         | Q9H7H0-3     | METTL17   | Isoform 3 of Methyltransferase-like protein 17, mitochondrial             |
| 0.993           | 0.967        | 1.001        | 0.966        | 0.939        | 0.986        | 1.017        | 0.946        | 1.018        | 1.017         | 0.996         | 1.064         | Q9UPN3-3     | MACF1     | Isoform 3 of Microtubule-actin cross-linking factor 1, isoforms 1/2/3/5   |
| 1.021           | 0.976        | 1.006        | 0.955        | 1.028        | 1.018        | 1.012        | 0.961        | 1.051        | 1.023         | 1.001         | 1.065         | A9UHW6-3     | MIF4GD    | Isoform 3 of MIF4G domain-containing protein                              |
| 1.233           | 0.897        | 1.488        |              |              |              |              |              |              |               |               |               | Q96C03-3     | MIEF2     | Isoform 3 of Mitochondrial dynamics protein MID49                         |
| 1.003           | 1.006        | 1.018        | 0.997        | 0.959        | 1.028        | 1.041        | 1.118        | 1.085        | 1.015         | 0.975         | 1.052         | Q8IXI2-3     | RHOT1     | Isoform 3 of Mitochondrial Rho GTPase 1                                   |
| 1.009           | 1.005        | 1.012        | 0.995        | 0.917        | 0.920        | 1.065        | 1.095        | 1.030        | 0.732         | 0.772         | 0.948         | O60566-3     | BUB1B     | Isoform 3 of Mitotic checkpoint serine/threonine-protein kinase BUB1 beta |
| 1.023           | 1.101        | 1.120        | 1.001        | 0.961        | 0.934        | 0.981        | 1.077        | 0.981        |               |               |               | Q9ULH7-3     | MKL2      | Isoform 3 of MKL/myocardin-like protein 2                                 |
| 0.936           | 1.034        | 0.984        | 0.978        | 0.971        | 1.065        | 1.069        | 1.001        | 0.999        | 1.079         | 0.995         | 1.084         | Q70IA6-3     | MOB2      | Isoform 3 of MOB kinase activator 2                                       |
| 1.170           | 1.023        | 1.119        | 1.112        | 0.891        | 0.934        | 1.031        | 0.905        | 0.986        | 0.949         | 1.012         | 1.066         | Q8N5Y8-3     | PARP16    | Isoform 3 of Mono [ADP-ribose] polymerase PARP16                          |
|                 |              |              |              |              |              |              |              |              | 0.784         | 0.998         | 1.001         | Q9UJG1-3     | MOSPD1    | Isoform 3 of Motile sperm domain-containing protein 1                     |
| 1.101           | 0.903        | 0.913        | 0.988        | 1.032        | 0.941        | 0.937        | 1.050        | 0.997        | 1.026         | 1.061         | 1.077         | P58340-3     | MLF1      | Isoform 3 of Myeloid leukemia factor 1                                    |
|                 |              |              |              |              |              | 1.004        | 1.507        | 1.050        | 1.016         | 1.045         | 0.941         | Q9NZM1-3     | MYOF      | Isoform 3 of Myoferlin                                                    |
| 1.047           | 0.975        | 1.130        | 1.065        | 0.959        | 0.979        | 1.042        | 0.996        | 1.001        | 1.032         | 1.066         | 1.181         | P35580-3     | MYH10     | Isoform 3 of Myosin-10                                                    |
| 0.966           | 0.996        | 1.059        | 0.990        | 1.018        | 1.012        | 0.971        | 0.996        | 1.014        | 1.023         | 1.028         | 1.026         | Q9Y303-3     | AMDHD2    | Isoform 3 of N-acetylglucosamine-6-phosphate deacetylase                  |
|                 |              |              | 0.944        | 0.930        | 0.997        | 0.951        | 0.964        | 0.991        |               |               |               | P15559-3     | NQO1      | Isoform 3 of NAD(P)H dehydrogenase [quinone] 1                            |
| 0.938           | 1.000        | 0.913        | 0.974        | 0.954        | 0.954        | 1.056        | 1.043        | 0.988        | 1.100         | 1.048         | 1.068         | P00387-3     | CYB5R3    | Isoform 3 of NADH-cytochrome b5 reductase 3                               |
| 0.804           | 1.055        | 1.048        | 1.270        | 1.097        | 1.080        | 1.120        | 1.017        | 1.145        | 0.995         | 0.903         | 1.084         | Q9NQS3-3     | NECTIN3   | Isoform 3 of Nectin-3                                                     |

| Abundance Ratio |              |              |              |              |              |              |              |              |               |               |               | Accession ID | Gene name | Protein Description                                                |
|-----------------|--------------|--------------|--------------|--------------|--------------|--------------|--------------|--------------|---------------|---------------|---------------|--------------|-----------|--------------------------------------------------------------------|
| 1 d<br>M1/C1    | 1 d<br>M2/C2 | 1 d<br>M3/C3 | 4 d<br>M1/C1 | 4 d<br>M2/C2 | 4 d<br>M3/C3 | 7 d<br>M1/C1 | 7 d<br>M2/C2 | 7 d<br>M3/C3 | 10 d<br>M1/C1 | 10 d<br>M2/C2 | 10 d<br>M3/C3 |              |           |                                                                    |
| 1.037           | 1.045        | 1.040        | 0.980        | 0.962        | 0.945        | 0.924        | 0.803        | 1.043        | 1.048         | 0.934         | 1.187         | Q9ULJ8-3     | PPP1R9A   | Isoform 3 of Neurabin-1                                            |
| 1.053           | 1.020        | 1.049        | 1.009        | 0.981        | 1.007        | 0.922        | 1.167        | 1.065        | 0.999         | 0.999         | 1.111         | Q9UBB6-3     | NCDN      | Isoform 3 of Neurochondrin                                         |
| 1.001           | 0.893        | 0.988        | 1.059        | 0.977        | 1.022        | 1.008        | 1.105        | 1.066        | 1.004         | 0.974         | 1.012         | Q9GZT8-3     | NIF3L1    | Isoform 3 of NIF3-like protein 1                                   |
| 1.163           | 1.004        | 1.013        | 1.064        | 1.005        | 0.950        | 0.827        | 1.130        | 1.123        | 1.076         | 0.976         | 1.138         | Q9NPJ8-3     | NXT2      | Isoform 3 of NTF2-related export protein 2                         |
| 0.973           | 1.014        | 1.009        | 1.005        | 0.983        | 0.982        | 1.000        | 1.036        | 0.983        | 1.001         | 1.019         | 1.003         | P49790-3     | NUP153    | Isoform 3 of Nuclear pore complex protein Nup153                   |
| 1.000           | 1.072        | 1.020        | 1.001        | 1.012        | 1.020        | 1.055        | 1.003        | 0.945        |               |               |               | P35658-3     | NUP214    | Isoform 3 of Nuclear pore complex protein Nup214                   |
|                 |              |              |              |              |              |              |              |              | 1.269         | 1.124         | 1.008         | Q92570-3     | NR4A3     | Isoform 3 of Nuclear receptor subfamily 4 group A member 3         |
| 0.937           | 0.946        | 1.050        | 0.959        | 0.815        | 1.016        | 0.897        | 1.150        | 0.926        | 0.946         | 0.976         | 1.016         | Q14978-3     | NOLC1     | Isoform 3 of Nucleolar and coiled-body phosphoprotein 1            |
| 1.078           | 0.949        | 1.003        | 1.002        | 0.951        | 0.998        | 0.986        | 1.058        | 1.016        | 0.969         | 0.994         | 1.035         | O60936-3     | NOL3      | Isoform 3 of Nucleolar protein 3                                   |
| 1.023           | 0.992        | 1.013        | 1.029        | 0.971        | 1.011        | 1.059        | 0.992        | 0.981        | 1.032         | 0.981         | 1.025         | Q9BUP3-3     | HTATIP2   | Isoform 3 of Oxidoreductase HTATIP2                                |
| 0.940           | 0.973        | 1.007        | 0.960        | 0.903        | 0.963        | 0.988        | 0.994        | 0.982        | 1.017         | 0.957         | 1.045         | Q06710-3     | PAX8      | Isoform 3 of Paired box protein Pax-8                              |
| 0.955           | 1.015        | 0.985        | 0.982        | 1.006        | 1.001        | 0.947        | 0.980        | 0.999        | 0.975         | 1.030         | 0.988         | O60664-3     | PLIN3     | Isoform 3 of Perilipin-3                                           |
| 1.051           | 0.916        | 1.068        | 1.032        | 0.949        | 1.152        |              |              |              |               |               |               | Q9UKG9-3     | CROT      | Isoform 3 of Peroxisomal carnitine O-octanoyltransferase           |
| 1.090           | 0.995        | 1.137        | 0.956        | 0.871        | 0.985        | 0.762        | 0.966        | 1.222        | 0.936         | 0.967         | 1.047         | Q96BD5-3     | PHF21A    | Isoform 3 of PHD finger protein 21A                                |
| 1.026           | 1.023        | 1.033        | 0.965        | 0.936        | 0.988        | 1.012        | 1.084        | 0.994        | 0.956         | 1.005         | 0.956         | Q96BW9-3     | TAMM41    | Isoform 3 of Phosphatidate cytidylyltransferase, mitochondrial     |
| 0.978           | 0.985        | 0.984        | 1.010        | 0.981        | 0.993        | 1.014        | 1.064        | 1.043        | 1.056         | 1.042         | 1.033         | P48739-3     | PITPNB    | Isoform 3 of Phosphatidylinositol transfer protein beta isoform    |
| 0.985           | 0.989        | 1.031        | 0.989        | 1.038        | 0.997        | 0.998        | 0.956        | 0.998        | 0.991         | 0.966         | 1.038         | O95394-4     | PGM3      | Isoform 3 of Phosphoacetylglucosamine mutase                       |
| 1.028           | 0.935        | 1.041        | 0.898        | 0.916        | 1.049        | 0.993        | 0.854        | 1.001        | 1.060         | 1.003         | 1.117         | Q9Y2Q0-3     | ATP8A1    | Isoform 3 of Phospholipid-transporting ATPase IA                   |
| 0.884           | 0.997        | 1.022        | 1.006        | 0.872        | 0.943        | 0.919        | 1.127        | 0.869        |               |               |               | P98198-3     | ATP8B2    | Isoform 3 of Phospholipid-transporting ATPase ID                   |
| 1.046           | 1.005        | 1.031        | 1.031        | 0.944        | 1.002        | 1.002        | 1.160        | 1.011        | 1.000         | 1.084         | 0.994         | Q93100-3     | PHKB      | Isoform 3 of Phosphorylase b kinase regulatory subunit beta        |
| 1.072           | 1.020        | 0.994        | 0.971        | 0.989        | 0.799        | 1.011        | 1.297        | 0.940        | 1.052         | 1.064         | 1.310         | Q8NC51-3     | SERBP1    | Isoform 3 of Plasminogen activator inhibitor 1 RNA-binding protein |
| 0.970           | 0.957        | 1.039        | 1.006        | 0.894        | 0.989        | 0.996        | 0.994        | 1.002        | 1.100         | 0.965         | 1.080         | Q15149-3     | PLEC      | Isoform 3 of Plectin                                               |
|                 |              |              | 0.995        | 1.210        | 1.019        | 1.486        | 1.542        | 1.056        | 1.019         | 0.922         | 1.057         | Q7Z5L7-3     | PODN      | Isoform 3 of Podocan                                               |
| 1.099           | 0.936        | 1.013        | 1.145        | 1.335        | 1.070        | 1.027        | 1.049        | 1.150        | 0.913         | 0.992         | 1.036         | Q15366-3     | PCBP2     | Isoform 3 of Poly(rC)-binding protein 2                            |
| 1.024           | 1.006        | 0.999        | 0.989        | 0.979        | 0.992        | 0.978        | 1.029        | 0.994        | 0.992         | 1.017         | 0.977         | Q13310-3     | PABPC4    | Isoform 3 of Polyadenylate-binding protein 4                       |
| 0.809           | 0.851        | 1.095        | 0.818        | 1.107        | 1.029        | 0.635        | 0.415        | 0.918        | 0.856         | 0.991         | 0.966         | P26599-3     | PTBP1     | Isoform 3 of Polypyrimidine tract-binding protein 1                |

| Abundance Ratio |              |              |              |              |              |              |              |              |               |               |               | Accession ID | Gene name | Protein Description                                                     |
|-----------------|--------------|--------------|--------------|--------------|--------------|--------------|--------------|--------------|---------------|---------------|---------------|--------------|-----------|-------------------------------------------------------------------------|
| 1 d<br>M1/C1    | 1 d<br>M2/C2 | 1 d<br>M3/C3 | 4 d<br>M1/C1 | 4 d<br>M2/C2 | 4 d<br>M3/C3 | 7 d<br>M1/C1 | 7 d<br>M2/C2 | 7 d<br>M3/C3 | 10 d<br>M1/C1 | 10 d<br>M2/C2 | 10 d<br>M3/C3 |              |           |                                                                         |
| 1.005           | 1.015        | 1.068        | 0.927        | 1.018        | 1.070        | 0.919        | 0.899        | 0.991        | 0.990         | 0.927         | 1.030         | Q6UN15-3     | FIP1L1    | Isoform 3 of Pre-mRNA 3'-end-processing factor FIP1                     |
| 1.009           | 1.000        | 0.990        | 0.978        | 0.962        | 1.027        | 0.993        | 1.003        | 0.964        | 1.022         | 1.008         | 1.001         | O75400-3     | PRPF40A   | Isoform 3 of Pre-mRNA-processing factor 40 homolog A                    |
| 1.007           | 0.979        | 0.954        | 0.934        | 0.930        | 0.936        | 0.953        | 1.103        | 0.960        | 0.982         | 0.971         | 0.940         | Q96B36-3     | AKT1S1    | Isoform 3 of Proline-rich AKT1 substrate 1                              |
| 0.917           | 0.909        | 0.983        | 1.017        | 0.971        | 1.044        | 0.905        | 0.776        | 1.107        | 1.183         | 0.816         | 1.034         | Q9ULL5-3     | PRR12     | Isoform 3 of Proline-rich protein 12                                    |
| 1.036           | 1.092        | 1.080        | 1.154        | 0.888        | 1.092        | 0.850        | 1.037        | 0.993        | 1.039         | 1.191         | 1.039         | O95905-3     | ECD       | Isoform 3 of Protein ecdysoneless homolog                               |
| 1.360           | 0.965        | 1.009        | 1.256        | 1.044        | 1.463        |              |              |              |               |               |               | Q3B820-3     | FAM161A   | Isoform 3 of Protein FAM161A                                            |
| 1.033           | 0.938        | 0.999        | 1.063        | 1.005        | 1.037        | 0.995        | 0.944        | 1.111        | 0.952         | 0.996         | 0.950         | Q8TAV0-3     | FAM76A    | Isoform 3 of Protein FAM76A                                             |
| 1.012           | 0.960        | 0.977        | 1.008        | 1.063        | 1.040        | 1.033        | 1.069        | 1.039        | 1.022         | 1.001         | 1.082         | Q9Y316-3     | MEMO1     | Isoform 3 of Protein MEMO1                                              |
| 1.007           | 0.989        | 0.989        | 0.975        | 0.968        | 0.999        | 1.013        | 0.903        | 0.987        | 1.035         | 0.990         | 1.065         | Q8NHV4-3     | NEDD1     | Isoform 3 of Protein NEDD1                                              |
| 1.037           | 0.960        | 1.016        | 1.032        | 0.942        | 1.056        | 0.990        | 1.022        | 0.980        | 1.053         | 1.036         | 1.043         | P35813-3     | PPM1A     | Isoform 3 of Protein phosphatase 1A                                     |
|                 |              |              | 0.993        | 1.006        | 0.953        |              |              |              |               |               |               | Q7L099-3     | RUFY3     | Isoform 3 of Protein RUFY3                                              |
| 1.055           | 0.996        | 1.006        | 1.016        | 1.058        | 0.987        | 1.036        | 0.917        | 1.039        | 1.036         | 1.003         | 1.072         | P55735-3     | SEC13     | Isoform 3 of Protein SEC13 homolog                                      |
| 1.072           | 1.150        | 1.291        |              |              |              |              |              |              |               |               |               | Q9BVV6-3     | KIAA0586  | Isoform 3 of Protein TALPID3                                            |
| 0.989           | 1.010        | 1.001        | 0.978        | 0.967        | 0.998        | 0.966        | 1.076        | 0.994        | 0.971         | 0.982         | 0.991         | O95487-3     | SEC24B    | Isoform 3 of Protein transport protein Sec24B                           |
|                 |              |              |              |              |              |              |              |              | 0.735         | 1.269         | 0.984         | Q70J99-3     | UNC13D    | Isoform 3 of Protein unc-13 homolog D                                   |
| 1.025           | 1.009        | 1.031        | 0.976        | 0.958        | 0.963        | 1.010        | 1.021        | 1.011        | 1.044         | 1.095         | 0.970         | Q969M3-3     | YIPF5     | Isoform 3 of Protein YIPF5                                              |
|                 |              |              |              |              |              | 0.925        | 1.509        | 1.567        |               |               |               | Q5T4F4-3     | ZFYVE27   | Isoform 3 of Protrudin                                                  |
| 1.013           | 1.016        | 1.137        | 1.019        | 0.979        | 1.080        | 1.024        | 0.971        | 1.078        | 1.084         | 1.012         | 1.033         | Q8TB72-3     | PUM2      | Isoform 3 of Pumilio homolog 2                                          |
| 1.051           | 0.968        | 0.976        | 1.018        | 0.977        | 1.037        | 0.960        | 1.033        | 1.086        | 1.043         | 1.040         | 1.030         | Q17R31-3     | TATDN3    | Isoform 3 of Putative deoxyribonuclease TATDN3                          |
| 1.001           | 1.007        | 0.986        | 0.996        | 1.032        | 0.959        | 0.971        | 0.964        | 0.997        | 0.949         | 0.978         | 0.952         | P32322-3     | PYCR1     | Isoform 3 of Pyrroline-5-carboxylate reductase 1, mitochondrial         |
| 0.990           | 0.980        | 0.970        | 0.975        | 0.875        | 0.896        | 1.276        | 0.893        | 0.971        | 1.084         | 0.892         | 1.183         | Q15032-3     | R3HDM1    | Isoform 3 of R3H domain-containing protein 1                            |
|                 |              |              | 0.938        | 0.927        | 0.912        | 1.172        | 1.037        | 1.043        |               |               |               | O75154-3     | RAB11FIP3 | Isoform 3 of Rab11 family-interacting protein 3                         |
| 0.946           | 1.037        | 1.082        | 0.998        | 0.973        | 1.046        | 1.029        | 1.020        | 1.079        | 1.118         | 1.114         | 1.244         | Q13905-3     | RAPGEF1   | Isoform 3 of Rap guanine nucleotide exchange factor 1                   |
| 1.021           | 0.987        | 1.025        | 1.014        | 0.982        | 1.036        | 0.977        | 1.000        | 0.992        | 0.998         | 0.981         | 1.024         | Q6R327-3     | RICTOR    | Isoform 3 of Rapamycin-insensitive companion of mTOR                    |
|                 |              |              |              |              |              |              |              |              | 1.075         | 0.974         | 1.267         | Q5VT52-3     | RPRD2     | Isoform 3 of Regulation of nuclear pre-mRNA domain-containing protein 2 |
| 0.990           | 1.010        | 1.026        | 0.982        | 1.006        | 1.035        | 0.943        | 1.084        | 1.061        | 0.937         | 0.989         | 1.038         | O43665-3     | RGS10     | Isoform 3 of Regulator of G-protein signaling 10                        |
| 1.053           | 1.008        | 1.043        | 1.007        | 1.150        | 0.949        | 1.005        | 0.957        | 1.068        | 0.995         | 1.000         | 0.985         | P15927-3     | RPA2      | Isoform 3 of Replication protein A 32 kDa subunit                       |
| 0.942           | 0.968        | 1.036        | 0.910        | 0.999        | 1.068        | 0.955        | 0.784        | 1.057        | 1.003         | 0.942         | 1.034         | Q9P2K3-3     | RCOR3     | Isoform 3 of REST corepressor 3                                         |
| 1.054           | 0.976        | 1.013        | 1.065        | 0.959        | 1.002        | 1.076        | 1.210        | 1.025        | 0.896         | 0.879         | 0.981         | Q86XN8-3     | MEX3D     | Isoform 3 of RNA-binding protein MEX3D                                  |
| 1.028           | 0.988        | 1.015        | 0.963        | 1.014        | 0.991        | 1.011        | 0.871        | 1.010        | 1.053         | 1.038         | 1.048         | Q15424-3     | SAFB      | Isoform 3 of Scaffold attachment factor B1                              |

| Abundance Ratio |              |              |              |              |              |              |              |              |               |               |               | Accession ID | Gene name | Protein Description                                                                     |
|-----------------|--------------|--------------|--------------|--------------|--------------|--------------|--------------|--------------|---------------|---------------|---------------|--------------|-----------|-----------------------------------------------------------------------------------------|
| 1 d<br>M1/C1    | 1 d<br>M2/C2 | 1 d<br>M3/C3 | 4 d<br>M1/C1 | 4 d<br>M2/C2 | 4 d<br>M3/C3 | 7 d<br>M1/C1 | 7 d<br>M2/C2 | 7 d<br>M3/C3 | 10 d<br>M1/C1 | 10 d<br>M2/C2 | 10 d<br>M3/C3 |              |           |                                                                                         |
| 1.057           | 0.968        | 0.948        | 0.951        | 0.895        | 1.035        | 1.017        | 1.036        | 0.950        | 1.007         | 1.060         | 0.982         | Q96PY6-3     | NEK1      | Isoform 3 of Serine/threonine-protein kinase Nek1                                       |
| 0.935           | 1.019        | 1.151        | 0.962        | 0.898        | 0.952        | 0.948        | 1.103        | 1.050        | 1.052         | 1.053         | 1.047         | P48454-3     | PPP3CC    | Isoform 3 of Serine/threonine-protein phosphatase 2B catalytic subunit gamma isoform    |
| 1.003           | 0.998        | 1.023        | 1.021        | 1.014        | 0.997        | 0.987        | 0.993        | 0.988        | 1.008         | 0.971         | 0.995         | O00743-3     | PPP6C     | Isoform 3 of Serine/threonine-protein phosphatase 6 catalytic subunit                   |
| 1.036           | 0.991        | 1.013        | 0.984        | 0.955        | 0.992        | 0.998        | 1.042        | 1.007        | 0.957         | 0.973         | 1.047         | O15084-1     | ANKRD28   | Isoform 3 of Serine/threonine-protein phosphatase 6 regulatory ankyrin repeat subunit A |
| 1.012           | 0.945        | 1.018        | 0.994        | 0.988        | 1.043        | 1.011        | 0.940        | 1.028        | 1.009         | 1.030         | 1.057         | Q9UPX8-3     | SHANK2    | Isoform 3 of SH3 and multiple ankyrin repeat domains protein 2                          |
|                 |              |              |              |              |              |              |              |              | 0.973         | 0.866         | 1.159         | Q9NQQ7-3     | SLC35C2   | Isoform 3 of Solute carrier family 35 member C2                                         |
| 1.008           | 1.006        | 1.048        | 0.986        | 0.975        | 1.070        | 1.039        | 1.076        | 1.011        | 1.060         | 0.974         | 1.009         | Q9UNH6-3     | SNX7      | Isoform 3 of Sorting nexin-7                                                            |
| 0.979           | 1.034        | 0.966        | 1.051        | 1.035        | 0.901        | 1.026        | 1.055        | 1.021        | 1.054         | 1.007         | 1.109         | Q13813-3     | SPTAN1    | Isoform 3 of Spectrin alpha chain, non-erythrocytic 1                                   |
|                 |              |              |              |              |              |              |              |              | 1.189         | 1.098         | 0.994         | O75602-3     | SPAG6     | Isoform 3 of Sperm-associated antigen 6                                                 |
| 1.004           | 0.968        | 1.028        | 1.012        | 0.931        | 1.095        | 1.048        | 1.034        | 1.126        | 1.013         | 1.045         | 1.119         | Q9NRL3-3     | STRN4     | Isoform 3 of Striatin-4                                                                 |
| 0.812           | 0.792        | 1.069        | 0.919        | 0.908        | 1.072        | 1.001        | 0.885        | 1.082        | 0.980         | 0.918         | 1.027         | Q9HAC7-3     | SUGCT     | Isoform 3 of Succinate--hydroxymethylglutarate CoA-transferase                          |
| 1.159           | 1.029        | 1.091        | 1.117        | 1.007        | 1.231        | 1.166        | 1.308        | 1.038        | 1.084         | 0.935         | 1.008         | P04179-3     | SOD2      | Isoform 3 of Superoxide dismutase [Mn], mitochondrial                                   |
| 0.995           | 1.005        | 1.028        | 1.031        | 0.996        | 1.062        | 0.995        | 1.034        | 1.012        | 0.982         | 1.012         | 1.010         | Q8TC07-3     | TBC1D15   | Isoform 3 of TBC1 domain family member 15                                               |
| 0.764           | 0.960        | 0.985        | 0.934        | 0.952        | 1.036        | 1.068        | 0.945        | 0.997        | 1.157         | 1.074         | 1.068         | Q96BZ9-3     | TBC1D20   | Isoform 3 of TBC1 domain family member 20                                               |
| 0.988           | 0.948        | 1.102        | 0.915        | 0.930        | 1.072        | 1.007        | 0.972        | 0.946        | 0.970         | 0.948         | 1.094         | Q5JTV8-3     | TOR1AIP1  | Isoform 3 of Torsin-1A-interacting protein 1                                            |
| 1.020           | 1.033        | 0.977        | 1.066        | 1.066        | 1.027        | 1.048        | 1.156        | 0.997        | 1.033         | 1.050         | 1.000         | P0DI81-3     | TRAPPC2   | Isoform 3 of Trafficking protein particle complex subunit 2                             |
| 1.044           | 0.798        | 1.131        |              |              |              |              |              |              |               |               |               | Q99081-3     | TCF12     | Isoform 3 of Transcription factor 12                                                    |
| 0.933           | 0.981        | 0.951        | 0.974        | 1.046        | 1.001        | 0.831        | 1.010        | 1.171        | 0.850         | 0.953         | 0.997         | Q8NEM7-3     | SUPT20H   | Isoform 3 of Transcription factor SPT20 homolog                                         |
| 1.031           | 0.973        | 1.059        | 1.037        | 0.958        | 0.965        | 0.990        | 1.065        | 0.956        | 0.939         | 1.018         | 1.005         | Q86YP4-3     | GATAD2A   | Isoform 3 of Transcriptional repressor p66-alpha                                        |
| 1.140           | 0.920        | 1.063        | 1.019        | 0.879        | 0.945        | 1.180        | 1.012        | 1.102        |               |               |               | Q9NXG6-3     | P4HTM     | Isoform 3 of Transmembrane prolyl 4-hydroxylase                                         |
| 0.920           | 0.967        | 1.258        |              |              |              |              |              |              |               |               |               | Q96Q45-3     | TMEM237   | Isoform 3 of Transmembrane protein 237                                                  |
| 0.970           | 0.953        | 0.981        | 0.946        | 0.966        | 0.992        | 0.960        | 0.857        | 0.929        | 1.002         | 0.970         | 1.004         | Q13428-3     | TCOF1     | Isoform 3 of Treacle protein                                                            |
| 0.902           | 1.001        | 0.961        | 0.935        | 0.960        | 0.936        | 0.978        | 0.866        | 0.948        | 0.960         | 0.992         | 0.913         | P07951-3     | TPM2      | Isoform 3 of Tropomyosin beta chain                                                     |
| 0.967           | 0.936        | 1.010        | 1.001        | 0.942        | 1.038        | 0.940        | 0.983        | 1.027        | 1.032         | 1.007         | 1.094         | Q9H7E2-3     | TDRD3     | Isoform 3 of Tudor domain-containing protein 3                                          |
| 1.044           | 0.993        | 1.051        | 0.982        | 0.983        | 1.048        | 0.974        | 0.982        | 1.044        | 1.029         | 1.055         | 1.038         | Q9ULQ1-3     | TPCN1     | Isoform 3 of Two pore calcium channel protein 1                                         |
| 0.991           | 0.989        | 0.973        |              |              |              | 1.021        | 0.875        | 0.923        |               |               |               | Q9Y4E8-3     | USP15     | Isoform 3 of Ubiquitin carboxyl-terminal hydrolase 15                                   |

| Abundance Ratio |              |              |              |              |              |              |              |              |               |               |               | Accession ID | Gene name | Protein Description                                                         |
|-----------------|--------------|--------------|--------------|--------------|--------------|--------------|--------------|--------------|---------------|---------------|---------------|--------------|-----------|-----------------------------------------------------------------------------|
| 1 d<br>M1/C1    | 1 d<br>M2/C2 | 1 d<br>M3/C3 | 4 d<br>M1/C1 | 4 d<br>M2/C2 | 4 d<br>M3/C3 | 7 d<br>M1/C1 | 7 d<br>M2/C2 | 7 d<br>M3/C3 | 10 d<br>M1/C1 | 10 d<br>M2/C2 | 10 d<br>M3/C3 |              |           |                                                                             |
| 1.040           | 1.081        | 0.994        | 0.980        | 0.989        | 1.052        | 0.941        | 1.032        | 0.961        | 1.034         | 0.966         | 0.983         | Q9NVE5-3     | USP40     | Isoform 3 of Ubiquitin carboxyl-terminal hydrolase 40                       |
| 0.870           | 0.968        | 1.047        | 0.938        | 0.788        | 0.908        | 0.777        | 0.701        | 0.952        | 1.298         | 1.053         | 1.280         | Q8N5J2-3     | MINDY1    | Isoform 3 of Ubiquitin carboxyl-terminal hydrolase MINDY-1                  |
| 0.944           | 0.941        | 1.017        | 0.970        | 1.038        | 1.027        | 0.941        | 0.765        | 0.967        |               |               |               | O00159-3     | MYO1C     | Isoform 3 of Unconventional myosin-Ic                                       |
| 1.058           | 0.989        | 1.025        | 1.036        | 0.951        | 1.025        | 1.003        | 1.036        | 1.033        | 0.992         | 0.964         | 0.976         | Q9H3H3-3     | C11orf68  | Isoform 3 of UPF0696 protein C11orf68                                       |
| 1.002           | 0.986        | 1.004        | 1.003        | 0.976        | 1.001        | 1.015        | 1.076        | 1.052        | 0.953         | 0.954         | 1.045         | Q8N3P4-3     | VPS8      | Isoform 3 of Vacuolar protein sorting-associated protein 8 homolog          |
| 0.979           | 0.995        | 0.998        | 0.973        | 0.987        | 0.987        | 0.965        | 0.984        | 0.963        | 0.959         | 0.907         | 0.977         | P49748-3     | ACADVL    | Isoform 3 of Very long-chain specific acyl-CoA dehydrogenase, mitochondrial |
| 0.986           | 1.006        | 0.991        | 1.020        | 0.867        | 1.058        | 1.055        | 1.058        | 1.025        | 1.104         | 1.077         | 1.023         | Q93050-3     | ATP6V0A1  | Isoform 3 of V-type proton ATPase 116 kDa subunit a isoform 1               |
| 1.069           | 1.033        | 1.049        | 1.112        | 0.922        | 1.046        | 1.118        | 1.043        | 1.048        | 1.202         | 0.998         | 1.097         | Q9Y484-3     | WDR45     | Isoform 3 of WD repeat domain phosphoinositide-interacting protein 4        |
| 0.999           | 0.998        | 1.038        | 0.980        | 0.987        | 1.037        | 1.002        | 0.991        | 0.989        | 1.010         | 1.042         | 1.059         | Q7Z5K2-3     | WAPL      | Isoform 3 of Wings apart-like protein homolog                               |
| 0.976           | 1.001        | 0.993        | 0.998        | 0.986        | 1.012        | 0.982        | 1.032        | 1.019        | 0.967         | 0.979         | 1.057         | Q9NQW7-3     | XPNPEP1   | Isoform 3 of Xaa-Pro aminopeptidase 1                                       |
| 1.088           | 0.919        | 1.068        | 1.010        | 1.083        | 1.018        | 0.926        | 1.585        | 1.139        |               |               |               | Q8TBC5-3     | ZSCAN18   | Isoform 3 of Zinc finger and SCAN domain-containing protein 18              |
| 1.002           | 1.066        | 0.977        |              |              |              | 0.947        | 0.916        | 0.983        |               |               |               | O15231-3     | ZNF185    | Isoform 3 of Zinc finger protein 185                                        |
| 0.969           | 1.038        | 0.940        | 1.091        | 0.959        | 0.998        | 1.097        | 0.983        | 0.998        |               |               |               | Q96JM2-3     | ZNF462    | Isoform 3 of Zinc finger protein 462                                        |
| 0.979           | 0.926        | 0.928        | 0.908        | 0.913        | 1.169        | 0.951        | 0.949        | 0.927        |               |               |               | Q5VV52-3     | ZNF691    | Isoform 3 of Zinc finger protein 691                                        |
|                 |              |              |              |              |              | 0.966        | 0.878        | 0.816        |               |               |               | P17010-3     | ZFX       | Isoform 3 of Zinc finger X-chromosomal protein                              |
|                 |              |              |              |              |              |              |              |              | 1.209         | 1.152         | 1.308         | Q9ULB1-3     | NRXN1     | Isoform 3a of Neurexin-1                                                    |
| 1.022           | 1.004        | 1.024        | 1.015        | 0.997        | 0.990        | 0.996        | 1.034        | 1.020        | 1.013         | 1.015         | 0.990         | Q8TDZ2-4     | MICAL1    | Isoform 4 of [F-actin]-methionine sulfoxide oxidase MICAL1                  |
| 0.986           | 0.970        | 0.976        | 0.978        | 0.960        | 1.017        | 0.989        | 0.998        | 0.994        | 1.060         | 0.999         | 1.045         | Q8N983-4     | MRPL43    | Isoform 4 of 39S ribosomal protein L43, mitochondrial                       |
| 0.951           | 1.013        | 0.950        | 0.981        | 1.021        | 1.011        | 0.992        | 0.951        | 0.999        | 1.010         | 1.057         | 0.963         | P62847-4     | RPS24     | Isoform 4 of 40S ribosomal protein S24                                      |
| 0.972           | 1.002        | 0.996        | 1.052        | 0.999        | 1.031        | 1.022        | 1.136        | 1.055        | 0.968         | 1.047         | 0.992         | P08195-4     | SLC3A2    | Isoform 4 of 4F2 cell-surface antigen heavy chain                           |
| 0.975           | 0.995        | 1.004        | 1.013        | 0.944        | 0.996        | 1.012        | 1.098        | 1.040        | 1.027         | 1.024         | 1.069         | Q13085-4     | ACACA     | Isoform 4 of Acetyl-CoA carboxylase 1                                       |
|                 |              |              | 1.015        | 0.976        | 0.961        | 0.967        | 1.059        | 0.989        | 0.913         | 0.904         | 0.927         | Q8N4X5-4     | AFAP1L2   | Isoform 4 of Actin filament-associated protein 1-like 2                     |
| 1.138           | 0.972        | 0.998        |              |              |              | 1.071        | 1.296        | 0.956        | 0.989         | 1.237         | 0.947         | P36896-4     | ACVR1B    | Isoform 4 of Activin receptor type-1B                                       |
| 0.991           | 1.017        | 1.011        | 0.986        | 0.973        | 1.032        | 1.037        | 0.974        | 1.003        | 1.025         | 0.944         | 1.063         | Q9Y2D5-6     | AKAP2     | Isoform 4 of A-kinase anchor protein 2                                      |
| 0.966           | 1.000        | 1.091        | 1.043        | 0.903        | 0.958        | 0.946        | 1.111        | 1.165        | 1.053         | 0.994         | 1.151         | Q96BT7-4     | ALKBH8    | Isoform 4 of Alkylated DNA repair protein alkB homolog 8                    |
|                 |              |              | 1.064        | 1.131        | 0.975        | 1.031        | 1.170        | 0.963        | 0.910         | 1.023         | 0.966         | Q9NTJ4-4     | MAN2C1    | Isoform 4 of Alpha-mannosidase 2C1                                          |
| 1.035           | 0.832        | 1.191        | 0.948        | 0.979        | 1.076        | 0.983        | 0.897        | 1.011        | 1.012         | 0.971         | 1.008         | Q9UHK6-5     | AMACR     | Isoform 4 of Alpha-methylcrotonyl-CoA racemase                              |

| Abundance Ratio |              |              |              |              |              |              |              |              |               |               |               | Accession ID | Gene name | Protein Description                                                             |
|-----------------|--------------|--------------|--------------|--------------|--------------|--------------|--------------|--------------|---------------|---------------|---------------|--------------|-----------|---------------------------------------------------------------------------------|
| 1 d<br>M1/C1    | 1 d<br>M2/C2 | 1 d<br>M3/C3 | 4 d<br>M1/C1 | 4 d<br>M2/C2 | 4 d<br>M3/C3 | 7 d<br>M1/C1 | 7 d<br>M2/C2 | 7 d<br>M3/C3 | 10 d<br>M1/C1 | 10 d<br>M2/C2 | 10 d<br>M3/C3 |              |           |                                                                                 |
|                 |              |              | 0.884        | 0.899        | 0.988        | 0.997        | 1.034        | 1.174        | 1.177         | 1.052         | 1.128         | Q92870-4     | APBB2     | Isoform 4 of Amyloid beta A4 precursor protein-binding family B member 2        |
| 0.925           | 0.963        | 1.046        | 0.868        | 0.929        | 0.938        | 1.036        | 1.030        | 1.008        | 1.023         | 0.999         | 0.838         | Q9Y2J4-4     | AMOTL2    | Isoform 4 of Angiomotin-like protein 2                                          |
| 0.959           | 0.978        | 0.994        | 0.961        | 0.995        | 0.999        | 0.975        | 0.919        | 1.000        | 0.998         | 0.993         | 1.014         | Q9P0K7-4     | RAI14     | Isoform 4 of Ankycorbin                                                         |
| 1.117           | 0.978        | 1.104        |              |              |              |              |              |              |               |               |               | Q9UKV3-5     | ACIN1     | Isoform 4 of Apoptotic chromatin condensation inducer in the nucleus            |
| 1.011           | 0.993        | 1.021        | 0.999        | 1.035        | 1.033        | 1.000        | 0.926        | 1.005        | 1.025         | 1.028         | 1.072         | P52594-4     | AGFG1     | Isoform 4 of Arf-GAP domain and FG repeat-containing protein 1                  |
| 0.960           | 1.023        | 1.007        | 0.996        | 1.007        | 1.014        | 0.991        | 1.078        | 0.975        | 0.995         | 1.001         | 1.036         | Q96P47-4     | AGAP3     | Isoform 4 of Arf-GAP with GTPase, ANK repeat and PH domain-containing protein 3 |
| 0.957           | 1.013        | 0.953        | 1.049        | 0.980        | 1.040        | 1.073        | 0.974        | 1.020        | 1.168         | 1.007         | 1.150         | Q9NW81-4     | ATP5SL    | Isoform 4 of ATP synthase subunit s-like protein                                |
| 0.970           | 0.999        | 1.020        | 1.005        | 0.971        | 1.031        | 0.986        | 1.047        | 1.060        | 1.022         | 1.014         | 0.999         | Q9HCM4-4     | EPB41L5   | Isoform 4 of Band 4.1-like protein 5                                            |
| 1.007           | 1.028        | 1.006        | 1.025        | 0.999        | 0.992        | 0.997        | 1.110        | 0.983        | 1.023         | 0.994         | 1.062         | P32121-4     | ARRB2     | Isoform 4 of Beta-arrestin-2                                                    |
| 0.990           | 0.978        | 1.025        | 1.018        | 1.003        | 0.955        | 1.083        | 0.955        | 1.074        | 0.959         | 0.938         | 1.073         | P55290-4     | CDH13     | Isoform 4 of Cadherin-13                                                        |
| 1.691           | 0.880        | 0.992        | 2.278        | 0.859        | 0.973        | 2.177        | 0.814        | 1.005        | 1.017         | 1.031         | 1.110         | Q13137-4     | CALCOCO2  | Isoform 4 of Calcium-binding and coiled-coil domain-containing protein 2        |
| 0.956           | 0.997        | 0.953        | 1.027        | 0.997        | 1.036        | 1.002        | 1.086        | 1.021        | 1.021         | 0.936         | 1.046         | O43852-4     | CALU      | Isoform 4 of Calumenin                                                          |
| 1.054           | 0.977        | 1.017        | 1.064        | 0.946        | 1.099        | 1.100        | 1.108        | 1.036        | 1.091         | 1.015         | 1.071         | O15438-4     | ABCC3     | Isoform 4 of Canalicular multispecific organic anion transporter 2              |
| 1.020           | 0.992        | 1.002        | 1.006        | 1.006        | 1.042        | 1.015        | 1.019        | 1.025        | 1.036         | 1.022         | 1.020         | Q96JB5-4     | CDK5RAP3  | Isoform 4 of CDK5 regulatory subunit-associated protein 3                       |
|                 |              |              |              |              |              |              |              |              | 1.090         | 1.113         | 1.063         | P62633-4     | CNBP      | Isoform 4 of Cellular nucleic acid-binding protein                              |
| 0.953           | 1.046        | 1.035        | 0.976        | 0.929        | 1.097        | 1.070        | 1.131        | 0.987        | 0.962         | 0.951         | 1.117         | O14578-4     | CIT       | Isoform 4 of Citron Rho-interacting kinase                                      |
| 0.994           | 1.020        | 0.988        | 0.897        | 1.101        | 0.995        | 1.113        | 1.197        | 1.024        | 1.012         | 1.015         | 1.133         | O60271-4     | SPAG9     | Isoform 4 of C-Jun-amino-terminal kinase-interacting protein 4                  |
| 1.037           | 1.034        | 1.118        | 1.189        | 1.136        | 0.989        | 1.155        | 0.769        | 0.818        | 0.998         | 0.888         | 1.113         | Q7Z460-4     | CLASP1    | Isoform 4 of CLIP-associating protein 1                                         |
| 1.006           | 0.994        | 1.000        | 1.049        | 1.017        | 1.064        | 1.056        | 1.037        | 1.034        | 1.036         | 1.045         | 1.050         | O75534-4     | CSDE1     | Isoform 4 of Cold shock domain-containing protein E1                            |
| 1.003           | 0.970        | 1.062        | 1.109        | 0.882        | 0.980        | 1.059        | 1.190        | 1.089        | 0.870         | 0.896         | 0.936         | Q6IBW4-4     | NCAPH2    | Isoform 4 of Condensin-2 complex subunit H2                                     |
| 1.034           | 1.028        | 1.020        | 0.968        | 0.957        | 0.979        | 0.995        | 1.084        | 1.029        | 0.923         | 0.994         | 0.993         | O75909-4     | CCNK      | Isoform 4 of Cyclin-K                                                           |
| 0.934           | 1.013        | 1.026        | 1.002        | 1.020        | 0.989        | 1.051        | 1.141        | 1.022        | 0.843         | 0.844         | 1.029         | P11388-4     | TOP2A     | Isoform 4 of DNA topoisomerase 2-alpha                                          |
| 0.982           | 0.998        | 1.001        | 0.998        | 0.986        | 1.008        | 1.003        | 0.971        | 0.991        | 0.991         | 1.003         | 0.998         | P55265-4     | ADAR      | Isoform 4 of Double-stranded RNA-specific adenosine deaminase                   |
| 0.965           | 0.993        | 1.002        | 0.988        | 0.891        | 0.892        | 1.044        | 1.016        | 1.046        | 1.123         | 1.212         | 1.317         | O00429-2     | DNM1L     | Isoform 4 of Dynamin-1-like protein                                             |
|                 |              |              | 0.919        | 1.011        | 1.012        | 0.883        | 1.005        | 1.103        | 0.873         | 0.916         | 1.100         | P50570-4     | DNM2      | Isoform 4 of Dynamin-2                                                          |
| 1.030           | 1.028        | 1.018        | 1.030        | 0.989        | 1.031        | 1.061        | 0.998        | 1.062        | 0.987         | 0.961         | 1.071         | P46934-4     | NEDD4     | Isoform 4 of E3 ubiquitin-protein ligase NEDD4                                  |
| 1.048           | 1.105        | 1.053        | 1.090        | 1.010        | 1.015        | 1.156        | 1.171        | 0.998        |               |               |               | Q6ZT12-4     | UBR3      | Isoform 4 of E3 ubiquitin-protein ligase UBR3                                   |

| Abundance Ratio |              |              |              |              |              |              |              |              |               |               |               | Accession ID | Gene name | Protein Description                                                               |
|-----------------|--------------|--------------|--------------|--------------|--------------|--------------|--------------|--------------|---------------|---------------|---------------|--------------|-----------|-----------------------------------------------------------------------------------|
| 1 d<br>M1/C1    | 1 d<br>M2/C2 | 1 d<br>M3/C3 | 4 d<br>M1/C1 | 4 d<br>M2/C2 | 4 d<br>M3/C3 | 7 d<br>M1/C1 | 7 d<br>M2/C2 | 7 d<br>M3/C3 | 10 d<br>M1/C1 | 10 d<br>M2/C2 | 10 d<br>M3/C3 |              |           |                                                                                   |
| 0.987           | 0.978        | 1.015        | 0.992        | 0.937        | 0.953        | 1.003        | 1.155        | 1.076        | 1.004         | 1.014         | 0.949         | Q8TE02-4     | ELP5      | Isoform 4 of Elongator complex protein 5                                          |
| 1.063           | 1.008        | 1.101        | 1.003        | 0.908        | 0.967        | 1.037        | 1.214        | 0.993        | 1.064         | 0.997         | 1.071         | Q08345-5     | DDR1      | Isoform 4 of Epithelial discoidin domain-containing receptor 1                    |
| 0.995           | 0.962        | 1.030        | 0.975        | 0.978        | 1.003        | 0.973        | 1.046        | 1.081        | 0.990         | 1.003         | 1.104         | Q96ME1-4     | FBXL18    | Isoform 4 of F-box/LRR-repeat protein 18                                          |
| 0.998           | 0.905        | 1.009        | 1.088        | 0.974        | 1.057        | 0.966        | 1.045        | 1.094        | 0.937         | 0.919         | 0.969         | Q96C11-3     | FGGY      | Isoform 4 of FGGY carbohydrate kinase domain-containing protein                   |
| 0.945           | 1.028        | 1.225        | 1.043        | 0.852        | 1.060        | 0.939        | 1.100        | 0.906        |               |               |               | Q2V2M9-4     | FHOD3     | Isoform 4 of FH1/FH2 domain-containing protein 3                                  |
| 0.999           | 0.956        | 0.970        | 0.996        | 0.965        | 1.004        | 0.993        | 1.001        | 1.007        | 0.986         | 0.963         | 1.011         | Q5T0N5-4     | FNBP1L    | Isoform 4 of Formin-binding protein 1-like                                        |
| 0.988           | 0.988        | 0.979        | 0.987        | 0.986        | 0.948        | 0.982        | 0.912        | 0.965        | 0.959         | 0.933         | 0.981         | Q13642-4     | FHL1      | Isoform 4 of Four and a half LIM domains protein 1                                |
| 0.954           | 0.986        | 1.032        | 1.022        | 0.943        | 1.034        | 1.040        | 0.990        | 1.000        | 1.026         | 0.986         | 1.052         | Q9BQS8-4     | FYCO1     | Isoform 4 of FYVE and coiled-coil domain-containing protein 1                     |
| 0.962           | 0.989        | 1.007        | 1.035        | 0.916        | 1.077        | 0.969        | 0.949        | 0.998        | 1.008         | 1.022         | 0.982         | P63092-4     | GNAS      | Isoform 4 of Guanine nucleotide-binding protein G(s) subunit alpha isoforms short |
|                 |              |              | 0.927        | 1.069        | 0.993        |              |              |              |               |               |               | Q9NQG7-4     | HPS4      | Isoform 4 of Hermansky-Pudlak syndrome 4 protein                                  |
| 1.014           | 1.145        | 1.308        |              |              |              | 1.006        | 0.690        | 1.206        | 1.031         | 1.118         | 1.402         | Q14103-4     | HNRNPD    | Isoform 4 of Heterogeneous nuclear ribonucleoprotein D0                           |
| 0.972           | 1.005        | 0.996        | 0.982        | 0.939        | 0.984        | 0.981        | 0.989        | 0.968        | 0.994         | 0.969         | 0.973         | Q70UQ0-4     | IKBIP     | Isoform 4 of Inhibitor of nuclear factor kappa-B kinase-interacting protein       |
| 1.007           | 1.046        | 1.067        | 0.798        | 1.070        | 1.156        | 1.237        | 1.266        | 0.959        |               |               |               | Q86Y91-4     | KIF18B    | Isoform 4 of Kinesin-like protein KIF18B                                          |
| 0.963           | 0.965        | 1.020        | 0.969        | 0.987        | 1.021        | 0.934        | 0.868        | 0.976        | 1.022         | 1.016         | 1.048         | Q7Z4S6-4     | KIF21A    | Isoform 4 of Kinesin-like protein KIF21A                                          |
| 0.927           | 0.987        | 1.051        | 0.962        | 0.967        | 1.017        | 0.995        | 1.034        | 1.018        | 1.009         | 0.983         | 1.042         | Q71RC2-4     | LARP4     | Isoform 4 of La-related protein 4                                                 |
| 0.835           | 0.904        | 0.990        | 1.077        | 0.990        | 1.073        | 1.035        | 1.019        | 1.056        | 0.999         | 0.913         | 1.157         | Q32MZ4-4     | LRRFIP1   | Isoform 4 of Leucine-rich repeat flightless-interacting protein 1                 |
| 1.021           | 0.990        | 1.022        | 1.044        | 0.985        | 0.990        | 0.991        | 0.935        | 0.987        | 1.075         | 1.045         | 1.071         | Q9Y608-4     | LRRFIP2   | Isoform 4 of Leucine-rich repeat flightless-interacting protein 2                 |
| 0.968           | 1.015        | 0.987        | 0.974        | 0.941        | 1.069        | 0.963        | 1.032        | 1.056        | 1.552         | 1.061         | 1.358         | Q8IW19-4     | MGA       | Isoform 4 of MAX gene-associated protein                                          |
| 0.990           | 1.000        | 1.037        | 1.024        | 1.031        | 0.929        | 0.984        | 1.087        | 1.074        | 0.955         | 0.938         | 1.016         | Q16891-4     | IMMT      | Isoform 4 of MICOS complex subunit MIC60                                          |
| 1.047           | 1.089        | 1.042        | 0.957        | 0.870        | 0.920        | 0.934        | 0.974        | 1.082        | 1.051         | 0.942         | 1.136         | P30305-4     | CDC25B    | Isoform 4 of M-phase inducer phosphatase 2                                        |
| 0.987           | 0.983        | 1.026        | 0.975        | 0.969        | 1.001        | 0.970        | 0.975        | 0.990        | 0.992         | 0.974         | 1.019         | P35580-4     | MYH10     | Isoform 4 of Myosin-10                                                            |
| 1.032           | 0.997        | 1.072        | 1.002        | 0.949        | 1.026        | 1.028        | 1.060        | 1.040        | 0.967         | 0.980         | 1.127         | O95248-4     | SBF1      | Isoform 4 of Myotubularin-related protein 5                                       |
| 0.848           | 0.993        | 1.071        | 0.874        | 0.718        | 0.711        | 1.133        | 0.850        | 0.961        | 0.948         | 0.914         | 0.945         | P49281-4     | SLC11A2   | Isoform 4 of Natural resistance-associated macrophage protein 2                   |
|                 |              |              | 1.085        | 0.880        | 1.017        | 1.032        | 1.161        | 0.993        |               |               |               | O15259-4     | NPHP1     | Isoform 4 of Nephrocystin-1                                                       |
| 0.960           | 0.977        | 0.997        | 0.943        | 0.921        | 0.984        | 0.967        | 0.963        | 0.987        | 1.006         | 0.957         | 1.028         | Q8IY17-4     | PNPLA6    | Isoform 4 of Neuropathy target esterase                                           |
|                 |              |              |              |              |              |              |              |              | 0.820         | 0.899         | 1.074         | Q13772-4     | NCOA4     | Isoform 4 of Nuclear receptor coactivator 4                                       |



| Abundance Ratio |              |              |              |              |              |              |              |              |               |               |               | Accession ID | Gene name | Protein Description                                                                          |
|-----------------|--------------|--------------|--------------|--------------|--------------|--------------|--------------|--------------|---------------|---------------|---------------|--------------|-----------|----------------------------------------------------------------------------------------------|
| 1 d<br>M1/C1    | 1 d<br>M2/C2 | 1 d<br>M3/C3 | 4 d<br>M1/C1 | 4 d<br>M2/C2 | 4 d<br>M3/C3 | 7 d<br>M1/C1 | 7 d<br>M2/C2 | 7 d<br>M3/C3 | 10 d<br>M1/C1 | 10 d<br>M2/C2 | 10 d<br>M3/C3 |              |           |                                                                                              |
| 1.073           | 1.022        | 1.019        | 1.059        | 0.986        | 0.990        | 1.066        | 1.197        | 1.062        | 1.056         | 1.057         | 1.090         | Q16656-4     | NRF1      | Isoform 4 of Nuclear respiratory factor 1                                                    |
| 1.078           | 1.116        | 0.995        | 1.160        | 1.033        | 0.968        | 0.961        | 0.750        | 1.028        | 1.041         | 1.072         | 1.139         | O75167-4     | PHACTR2   | Isoform 4 of Phosphatase and actin regulator 2                                               |
|                 |              |              | 0.950        | 1.012        | 1.046        | 1.010        | 0.988        | 1.034        |               |               |               | Q8IZ21-4     | PHACTR4   | Isoform 4 of Phosphatase and actin regulator 4                                               |
| 0.907           | 0.956        | 1.075        | 0.972        | 0.975        | 1.032        | 0.987        | 0.944        | 0.980        | 1.032         | 0.984         | 1.080         | P27986-4     | PIK3R1    | Isoform 4 of Phosphatidylinositol 3-kinase regulatory subunit alpha                          |
| 0.991           | 1.008        | 1.012        | 1.006        | 0.955        | 1.024        | 0.994        | 0.925        | 0.965        | 1.047         | 1.061         | 1.068         | Q9HAU0-4     | PLEKHA5   | Isoform 4 of Pleckstrin homology domain-containing family A member 5                         |
| 0.978           | 1.086        | 1.063        | 1.028        | 0.761        | 0.974        | 1.041        | 1.132        | 1.062        | 1.152         | 0.956         | 1.061         | Q15149-4     | PLEC      | Isoform 4 of Plectin                                                                         |
| 1.037           | 1.033        | 1.038        | 0.997        | 1.122        | 0.971        | 0.976        | 0.975        | 1.014        | 1.010         | 0.954         | 0.998         | O95758-4     | PTBP3     | Isoform 4 of Polypyrimidine tract-binding protein 3                                          |
| 0.999           | 0.985        | 0.992        | 0.973        | 0.990        | 1.011        | 0.991        | 0.979        | 1.012        | 1.000         | 1.017         | 1.010         | P46087-4     | NOP2      | Isoform 4 of Probable 28S rRNA (cytosine(4447)-C(5))-methyltransferase                       |
| 1.035           | 1.080        | 1.011        | 1.001        | 0.923        | 1.100        | 1.100        | 1.015        | 1.050        | 1.042         | 0.938         | 1.114         | Q7Z333-4     | SETX      | Isoform 4 of Probable helicase senataxin                                                     |
| 1.013           | 1.016        | 1.102        | 1.038        | 0.972        | 1.016        |              |              |              |               |               |               | O43822-4     | C21orf2   | Isoform 4 of Protein C21orf2                                                                 |
| 0.941           | 0.968        | 0.996        | 0.917        | 0.890        | 0.977        | 0.978        | 0.991        | 0.977        | 1.072         | 1.038         | 1.067         | Q6P4E1-4     | CASC4     | Isoform 4 of Protein CASC4                                                                   |
| 1.021           | 1.039        | 1.054        | 1.023        | 0.996        | 1.011        | 1.012        | 1.031        | 0.994        | 1.002         | 0.986         | 1.035         | Q6ZS17-4     | FAM65A    | Isoform 4 of Protein FAM65A                                                                  |
| 0.947           | 0.971        | 0.990        | 0.990        | 0.918        | 0.991        | 1.013        | 1.007        | 1.015        | 0.996         | 1.027         | 1.027         | Q9C0E8-4     | LNP       | Isoform 4 of Protein lunapark                                                                |
| 0.971           | 1.008        | 1.021        | 0.943        | 0.992        | 1.071        | 1.010        | 0.935        | 1.029        | 1.096         | 1.000         | 1.106         | Q9BZL4-4     | PPP1R12C  | Isoform 4 of Protein phosphatase 1 regulatory subunit 12C                                    |
| 1.265           | 1.111        | 1.067        | 1.004        | 0.981        | 0.971        | 0.971        | 1.038        | 0.973        | 1.019         | 1.097         | 1.033         | Q92540-4     | SMG7      | Isoform 4 of Protein SMG7                                                                    |
| 0.897           | 0.919        | 1.031        | 1.110        | 0.896        | 1.214        | 1.311        | 0.952        | 1.133        | 1.037         | 1.029         | 1.418         | Q9C0H2-4     | TTYH3     | Isoform 4 of Protein tweety homolog 3                                                        |
| 1.029           | 1.003        | 1.033        | 1.021        | 1.071        | 1.104        | 0.921        | 0.906        | 1.077        | 0.933         | 1.007         | 1.095         | Q08623-4     | PUDP      | Isoform 4 of Pseudouridine-5'-phosphatase                                                    |
| 0.959           | 0.983        | 0.969        | 0.979        | 0.995        | 0.999        | 1.004        | 0.948        | 0.964        | 0.993         | 0.981         | 0.982         | P08559-4     | PDHA1     | Isoform 4 of Pyruvate dehydrogenase E1 component subunit alpha, somatic form, mitochondrial  |
| 1.016           | 1.018        | 1.042        | 0.959        | 1.008        | 1.021        | 0.994        | 1.080        | 1.014        | 1.028         | 1.027         | 1.043         | Q9H974-4     | QTRT2     | Isoform 4 of Queuine tRNA-ribosyltransferase accessory subunit 2                             |
| 1.007           | 1.010        | 1.039        | 0.996        | 1.000        | 0.995        | 1.006        | 1.042        | 1.012        | 0.935         | 0.932         | 1.018         | Q9P2R3-4     | ANKFY1    | Isoform 4 of Rabankyrin-5                                                                    |
|                 |              |              | 0.918        | 1.013        | 1.014        | 1.014        | 0.866        | 0.968        | 1.080         | 1.039         | 0.946         | P47736-4     | RAP1GAP   | Isoform 4 of Rap1 GTPase-activating protein 1                                                |
|                 |              |              | 0.932        | 0.664        | 0.934        |              |              |              |               |               |               | Q96PV0-4     | SYNGAP1   | Isoform 4 of Ras/Rap GTPase-activating protein SynGAP                                        |
| 0.868           | 0.987        | 1.019        | 0.960        | 0.889        | 1.004        | 0.964        | 0.919        | 0.982        | 1.032         | 0.998         | 1.104         | P62070-4     | RRAS2     | Isoform 4 of Ras-related protein R-Ras2                                                      |
|                 |              |              |              |              |              | 0.954        | 1.115        | 1.032        | 0.845         | 1.079         | 0.942         | O43236-4     |           | 4-Sep Isoform 4 of Septin-4                                                                  |
| 1.032           | 1.129        | 1.063        | 0.956        | 0.922        | 0.992        | 0.976        | 1.093        | 0.867        |               |               |               | Q13362-4     | PPP2R5C   | Isoform 4 of Serine/threonine-protein phosphatase 2A 56 kDa regulatory subunit gamma isoform |
| 0.987           | 0.947        | 1.096        | 1.061        | 0.889        | 1.023        | 0.999        | 1.169        | 1.134        | 0.905         | 1.013         | 1.006         | P16298-4     | PPP3CB    | Isoform 4 of Serine/threonine-protein phosphatase 2B catalytic subunit beta isoform          |

| Abundance Ratio |              |              |              |              |              |              |              |              |               |               |               | Accession ID | Gene name | Protein Description                                                                   |
|-----------------|--------------|--------------|--------------|--------------|--------------|--------------|--------------|--------------|---------------|---------------|---------------|--------------|-----------|---------------------------------------------------------------------------------------|
| 1 d<br>M1/C1    | 1 d<br>M2/C2 | 1 d<br>M3/C3 | 4 d<br>M1/C1 | 4 d<br>M2/C2 | 4 d<br>M3/C3 | 7 d<br>M1/C1 | 7 d<br>M2/C2 | 7 d<br>M3/C3 | 10 d<br>M1/C1 | 10 d<br>M2/C2 | 10 d<br>M3/C3 |              |           |                                                                                       |
| 1.004           | 0.970        | 1.017        | 1.033        | 0.974        | 0.971        | 1.021        | 1.139        | 0.980        | 0.982         | 1.029         | 1.067         | Q96C92-4     | SDCCAG3   | Isoform 4 of Serologically defined colon cancer antigen 3                             |
|                 |              |              | 1.140        | 0.909        | 1.070        | 1.823        | 0.984        | 1.096        | 1.223         | 0.975         | 1.073         | P78314-4     | SH3BP2    | Isoform 4 of SH3 domain-binding protein 2                                             |
| 1.100           | 0.799        | 1.001        | 1.275        | 1.317        | 1.168        |              |              |              |               |               |               | P24821-4     | TNC       | Isoform 4 of Tenascin                                                                 |
| 1.239           | 1.155        | 1.147        | 1.211        | 0.848        | 1.012        | 1.156        | 1.253        | 1.047        |               |               |               | Q63HR2-4     | TNS2      | Isoform 4 of Tensin-2                                                                 |
| 1.082           | 1.042        | 1.040        | 1.044        | 1.050        | 1.052        | 1.066        | 0.996        | 1.011        | 1.029         | 1.034         | 1.045         | Q8NFU3-4     | TSTD1     | Isoform 4 of Thiosulfate sulfurtransferase/rhodanese-like domain-containing protein 1 |
| 1.131           | 0.952        | 1.102        | 0.976        | 1.012        | 1.055        | 1.108        | 0.881        | 0.966        | 1.093         | 1.010         | 1.126         | A5PLN9-5     | TRAPPC13  | Isoform 4 of Trafficking protein particle complex subunit 13                          |
| 1.046           | 0.990        | 1.113        | 0.959        | 0.982        | 0.993        | 0.961        | 1.066        | 1.003        | 1.015         | 0.967         | 1.071         | P21675-4     | TAF1      | Isoform 4 of Transcription initiation factor TFIID subunit 1                          |
| 1.077           | 1.102        | 1.068        | 0.966        | 0.936        | 0.993        | 1.005        | 1.172        | 1.050        | 1.031         | 1.022         | 0.896         | Q6ICL3-4     | TANGO2    | Isoform 4 of Transport and Golgi organization protein 2 homolog                       |
| 1.112           | 1.067        | 1.068        | 1.064        | 1.395        | 1.119        | 1.089        | 1.012        | 0.996        | 1.171         | 0.833         | 0.944         | O95379-4     | TNFAIP8   | Isoform 4 of Tumor necrosis factor alpha-induced protein 8                            |
|                 |              |              | 0.912        | 0.809        | 1.005        |              |              |              |               |               |               | Q12923-4     | PTPN13    | Isoform 4 of Tyrosine-protein phosphatase non-receptor type 13                        |
| 1.029           | 1.022        | 1.006        | 1.015        | 0.978        | 0.988        | 0.991        | 1.028        | 1.013        | 1.017         | 0.999         | 1.031         | Q96K76-4     | USP47     | Isoform 4 of Ubiquitin carboxyl-terminal hydrolase 47                                 |
| 0.998           | 0.992        | 1.033        | 0.997        | 0.938        | 1.028        | 1.041        | 1.023        | 1.034        | 1.032         | 0.999         | 1.098         | O95155-4     | UBE4B     | Isoform 4 of Ubiquitin conjugation factor E4 B                                        |
| 0.989           | 0.961        | 1.128        | 0.988        | 0.968        | 1.018        | 0.957        | 1.109        | 1.006        | 0.946         | 0.993         | 0.990         | Q9NZ09-4     | UBAP1     | Isoform 4 of Ubiquitin-associated protein 1                                           |
| 0.946           | 0.968        | 0.840        | 0.941        | 0.915        | 1.159        | 0.991        | 1.028        | 1.045        | 0.992         | 0.928         | 1.175         | P78381-4     | SLC35A2   | Isoform 4 of UDP-galactose translocator                                               |
| 1.155           | 1.353        | 1.111        | 1.091        | 1.626        | 1.070        | 1.174        | 1.438        | 1.115        | 1.027         | 1.496         | 0.955         | Q5SQH8-4     | C6orf136  | Isoform 4 of Uncharacterized protein C6orf136                                         |
| 1.191           | 1.054        | 1.112        | 0.957        | 0.929        | 0.980        | 1.062        | 0.960        | 0.882        | 0.909         | 0.794         | 1.132         | B2RTY4-4     | MYO9A     | Isoform 4 of Unconventional myosin-IXa                                                |
|                 |              |              | 1.036        | 1.010        | 0.893        |              |              |              |               |               |               | Q9HA47-4     | UCK1      | Isoform 4 of Uridine-cytidine kinase 1                                                |
| 0.996           | 1.010        | 1.012        | 0.985        | 1.014        | 1.003        | 1.005        | 1.068        | 1.030        | 0.995         | 0.995         | 1.047         | Q5VIR6-4     | VPS53     | Isoform 4 of Vacuolar protein sorting-associated protein 53 homolog                   |
| 0.954           | 1.049        | 0.990        | 0.964        | 1.026        | 1.028        | 1.007        | 1.110        | 1.036        | 0.932         | 0.958         | 1.022         | O94967-4     | WDR47     | Isoform 4 of WD repeat-containing protein 47                                          |
| 0.952           | 1.070        | 1.051        | 1.016        | 0.949        | 0.964        | 0.992        | 1.103        | 1.096        | 0.941         | 0.935         | 0.985         | O43379-4     | WDR62     | Isoform 4 of WD repeat-containing protein 62                                          |
| 1.013           | 0.994        | 1.003        | 0.999        | 0.980        | 1.002        | 1.023        | 0.964        | 0.976        | 1.042         | 0.993         | 1.042         | P49750-4     | YLPM1     | Isoform 4 of YLP motif-containing protein 1                                           |
| 1.151           | 0.958        | 1.011        | 0.914        | 0.935        | 1.047        | 1.000        | 1.046        | 1.049        | 0.990         | 0.949         | 1.062         | A7E2V4-4     | ZSWIM8    | Isoform 4 of Zinc finger SWIM domain-containing protein 8                             |
| 0.893           | 0.939        | 1.253        | 1.002        | 0.984        | 0.939        |              |              |              |               |               |               | Q9C0C7-5     | AMBRA1    | Isoform 5 of Activating molecule in BECN1-regulated autophagy protein 1               |
| 0.989           | 1.013        | 0.952        | 0.973        | 0.956        | 0.899        | 0.974        | 1.023        | 0.940        | 0.966         | 1.011         | 0.887         | P07108-5     | DBI       | Isoform 5 of Acyl-CoA-binding protein                                                 |
| 0.995           | 1.013        | 1.013        | 1.015        | 0.961        | 1.022        | 1.004        | 1.028        | 1.013        | 1.022         | 1.009         | 1.030         | P55196-5     | AFDN      | Isoform 5 of Afadin                                                                   |
| 1.019           | 1.016        | 1.023        | 1.004        | 0.990        | 1.004        | 1.003        | 1.016        | 1.045        | 0.987         | 1.006         | 0.995         | O14617-5     | AP3D1     | Isoform 5 of AP-3 complex subunit delta-1                                             |

| Abundance Ratio |              |              |              |              |              |              |              |              |               |               |               | Accession ID | Gene name | Protein Description                                                |
|-----------------|--------------|--------------|--------------|--------------|--------------|--------------|--------------|--------------|---------------|---------------|---------------|--------------|-----------|--------------------------------------------------------------------|
| 1 d<br>M1/C1    | 1 d<br>M2/C2 | 1 d<br>M3/C3 | 4 d<br>M1/C1 | 4 d<br>M2/C2 | 4 d<br>M3/C3 | 7 d<br>M1/C1 | 7 d<br>M2/C2 | 7 d<br>M3/C3 | 10 d<br>M1/C1 | 10 d<br>M2/C2 | 10 d<br>M3/C3 |              |           |                                                                    |
| 0.993           | 0.984        | 0.996        | 1.089        | 0.970        | 0.972        | 1.110        | 1.102        | 1.177        | 0.975         | 0.962         | 0.945         | Q96GD4-5     | AURKB     | Isoform 5 of Aurora kinase B                                       |
| 1.078           | 0.864        | 1.072        | 1.014        | 0.892        | 0.947        | 1.067        | 1.083        | 1.074        | 0.937         | 1.012         | 1.070         | O75143-5     | ATG13     | Isoform 5 of Autophagy-related protein 13                          |
| 0.921           | 1.045        | 0.855        |              |              |              |              |              |              |               |               |               | P54687-5     | BCAT1     | Isoform 5 of Branched-chain-amino-acid aminotransferase, cytosolic |
| 0.982           | 0.997        | 1.001        | 0.964        | 0.949        | 0.967        | 0.990        | 0.955        | 0.957        | 0.990         | 0.953         | 1.016         | Q05682-5     | CALD1     | Isoform 5 of Caldesmon                                             |
|                 |              |              | 0.958        | 0.871        | 1.031        |              |              |              |               |               |               | Q9Y2G2-5     | CARD8     | Isoform 5 of Caspase recruitment domain-containing protein 8       |
| 1.013           | 1.061        | 0.976        | 0.979        | 0.912        | 0.985        | 1.076        | 1.019        | 0.944        | 1.144         | 1.121         | 1.046         | Q8TCZ2-5     | CD99L2    | Isoform 5 of CD99 antigen-like protein 2                           |
|                 |              |              | 1.174        | 1.177        | 0.939        | 1.116        | 0.980        | 1.107        |               |               |               | P42771-4     | CDKN2A    | Isoform 5 of Cyclin-dependent kinase inhibitor 2A                  |
| 0.922           | 1.032        | 0.971        | 1.024        | 1.089        | 1.000        | 1.102        | 0.734        | 0.967        | 1.084         | 1.043         | 1.079         | Q6UXH1-5     | CRELD2    | Isoform 5 of Cysteine-rich with EGF-like domain protein 2          |
| 1.000           | 1.081        | 1.004        | 1.004        | 0.985        | 0.993        | 0.964        | 1.080        | 0.995        | 1.015         | 0.983         | 0.970         | Q7Z5Q1-6     | CPEB2     | Isoform 5 of Cytoplasmic polyadenylation element-binding protein 2 |
| 1.056           | 1.048        | 1.031        | 0.970        | 0.991        | 1.011        | 0.901        | 1.041        | 1.031        | 0.946         | 1.019         | 0.984         | Q9H2P9-5     | DPH5      | Isoform 5 of Diphthine methyl ester synthase                       |
| 1.057           | 1.049        | 1.057        | 0.981        | 0.938        | 1.034        | 0.986        | 1.077        | 1.011        | 0.993         | 1.013         | 1.008         | P78563-5     | ADARB1    | Isoform 5 of Double-stranded RNA-specific editase 1                |
| 1.125           | 0.998        | 1.028        | 0.901        | 0.907        | 1.044        |              |              |              | 1.025         | 0.910         | 1.109         | Q86XK2-5     | FBXO11    | Isoform 5 of F-box only protein 11                                 |
| 0.990           | 0.996        | 1.004        | 1.018        | 0.936        | 1.070        | 0.993        | 0.861        | 0.976        | 0.983         | 0.980         | 1.092         | Q9HCN4-5     | GPN1      | Isoform 5 of GPN-loop GTPase 1                                     |
| 1.014           | 1.061        | 0.958        |              |              |              |              |              |              |               |               |               | Q6NT76-5     | HMBOX1    | Isoform 5 of Homeobox-containing protein 1                         |
| 1.097           | 0.968        | 1.021        | 1.046        | 1.004        | 1.026        | 0.952        | 1.134        | 1.027        | 0.789         | 0.843         | 1.010         | Q9P2N7-5     | KLHL13    | Isoform 5 of Kelch-like protein 13                                 |
|                 |              |              |              |              |              | 1.125        | 1.620        | 0.919        |               |               |               | Q9BVG8-6     | KIFC3     | Isoform 5 of Kinesin-like protein KIFC3                            |
| 0.947           | 0.984        | 0.952        | 0.935        | 0.914        | 1.123        | 1.031        | 0.873        | 0.927        | 1.133         | 1.065         | 1.146         | P27816-5     | MAP4      | Isoform 5 of Microtubule-associated protein 4                      |
| 0.978           | 1.022        | 0.996        | 0.976        | 0.969        | 0.998        | 0.997        | 1.013        | 0.974        | 1.099         | 1.017         | 1.090         | Q9ULH7-5     | MKL2      | Isoform 5 of MKL/myocardin-like protein 2                          |
| 0.989           | 1.002        | 1.019        | 0.979        | 0.954        | 1.012        | 0.951        | 1.049        | 1.005        | 1.019         | 0.995         | 1.030         | Q96T76-8     | MMS19     | Isoform 5 of MMS19 nucleotide excision repair protein homolog      |
| 1.321           | 1.497        | 1.285        | 0.787        | 0.969        | 0.486        | 0.790        | 1.206        | 0.918        |               |               |               | Q9NR56-5     | MBNL1     | Isoform 5 of Muscleblind-like protein 1                            |
| 1.009           | 1.017        | 1.007        | 1.010        | 0.945        | 1.022        | 1.034        | 1.010        | 0.963        | 1.002         | 1.007         | 1.014         | Q8NDF8-5     | PAPD5     | Isoform 5 of Non-canonical poly(A) RNA polymerase PAPD5            |
| 1.027           | 1.083        | 1.106        | 1.003        | 0.938        | 1.066        | 0.979        | 1.002        | 1.119        | 0.986         | 0.929         | 1.026         | Q9BZF3-5     | OSBPL6    | Isoform 5 of Oxysterol-binding protein-related protein 6           |
| 1.037           | 1.023        | 0.999        | 1.044        | 1.122        | 0.982        | 1.049        | 0.945        | 1.010        | 1.020         | 1.009         | 1.028         | Q96JY6-5     | PDLIM2    | Isoform 5 of PDZ and LIM domain protein 2                          |
| 1.078           | 1.028        | 1.127        |              |              |              |              |              |              |               |               |               | P19021-5     | PAM       | Isoform 5 of Peptidyl-glycine alpha-amidating monooxygenase        |
| 1.033           | 1.020        | 1.029        | 0.998        | 0.963        | 1.004        | 1.014        | 1.040        | 1.026        | 1.031         | 0.994         | 1.066         | Q8IXK0-5     | PHC2      | Isoform 5 of Polyhomeotic-like protein 2                           |
|                 |              |              |              |              |              |              |              |              | 1.031         | 0.805         | 1.082         | Q9Y6V0-5     | PCLO      | Isoform 5 of Protein piccolo                                       |
| 1.085           | 1.022        | 1.149        | 1.003        | 0.969        | 1.059        | 0.984        | 0.970        | 1.075        | 1.042         | 1.043         | 1.050         | Q5R372-5     | RABGAP1L  | Isoform 5 of Rab GTPase-activating protein 1-like                  |
| 0.995           | 0.989        | 1.010        | 0.986        | 0.987        | 1.002        | 0.952        | 0.912        | 0.982        | 1.005         | 1.013         | 1.036         | P35241-5     | RDX       | Isoform 5 of Radixin                                               |

| Abundance Ratio |              |              |              |              |              |              |              |              |               |               |               | Accession ID | Gene name | Protein Description                                                             |
|-----------------|--------------|--------------|--------------|--------------|--------------|--------------|--------------|--------------|---------------|---------------|---------------|--------------|-----------|---------------------------------------------------------------------------------|
| 1 d<br>M1/C1    | 1 d<br>M2/C2 | 1 d<br>M3/C3 | 4 d<br>M1/C1 | 4 d<br>M2/C2 | 4 d<br>M3/C3 | 7 d<br>M1/C1 | 7 d<br>M2/C2 | 7 d<br>M3/C3 | 10 d<br>M1/C1 | 10 d<br>M2/C2 | 10 d<br>M3/C3 |              |           |                                                                                 |
| 1.003           | 1.003        | 1.022        | 0.995        | 0.981        | 1.005        | 1.026        | 1.045        | 1.034        | 1.022         | 0.966         | 1.055         | P52306-5     | RAP1GDS1  | Isoform 5 of Rap1 GTPase-GDP dissociation stimulator 1                          |
| 0.943           | 0.923        | 1.006        | 1.011        | 0.929        | 0.986        | 1.086        | 1.026        | 0.903        | 1.038         | 0.983         | 1.106         | O76081-6     | RGS20     | Isoform 5 of Regulator of G-protein signaling 20                                |
|                 |              |              |              |              |              |              |              |              | 1.026         | 0.920         | 1.104         | Q9NQC3-5     | RTN4      | Isoform 5 of Reticulon-4                                                        |
| 1.000           | 1.020        | 0.998        | 0.994        | 1.007        | 1.000        | 0.980        | 1.014        | 1.011        | 1.037         | 1.025         | 1.010         | Q14155-5     | ARHGEF7   | Isoform 5 of Rho guanine nucleotide exchange factor 7                           |
| 1.003           | 1.037        | 1.001        | 1.018        | 1.076        | 1.004        | 1.015        | 0.998        | 1.010        | 1.008         | 1.037         | 1.066         | Q01844-5     | EWSR1     | Isoform 5 of RNA-binding protein EWS                                            |
| 0.769           | 1.026        | 1.018        | 1.066        | 1.037        | 1.032        |              |              |              |               |               |               | Q8IWQ3-5     | BRSK2     | Isoform 5 of Serine/threonine-protein kinase BRSK2                              |
| 1.009           | 1.046        | 1.068        | 1.020        | 0.938        | 1.048        | 1.026        | 1.085        | 1.048        | 1.042         | 0.970         | 1.049         | O75170-5     | PPP6R2    | Isoform 5 of Serine/threonine-protein phosphatase 6 regulatory subunit 2        |
| 0.962           | 0.986        | 0.988        | 0.970        | 0.944        | 1.025        | 1.008        | 1.060        | 1.027        | 0.972         | 0.960         | 1.063         | Q5H9R7-5     | PPP6R3    | Isoform 5 of Serine/threonine-protein phosphatase 6 regulatory subunit 3        |
|                 |              |              | 0.891        | 0.750        | 1.118        | 0.981        | 0.910        | 0.921        | 1.034         | 0.963         | 1.019         | Q8TDB8-5     | SLC2A14   | Isoform 5 of Solute carrier family 2, facilitated glucose transporter member 14 |
|                 |              |              |              |              |              | 0.915        | 0.943        | 1.248        | 1.035         | 1.143         | 0.878         | Q9NRA0-5     | SPHK2     | Isoform 5 of Sphingosine kinase 2                                               |
| 1.012           | 1.021        | 0.979        | 1.007        | 1.122        | 0.964        | 1.007        | 0.952        | 1.009        | 1.004         | 1.040         | 1.007         | Q15637-5     | SF1       | Isoform 5 of Splicing factor 1                                                  |
| 1.060           | 1.044        | 0.984        | 0.990        | 0.960        | 0.985        | 1.048        | 1.060        | 1.058        | 1.179         | 1.120         | 1.290         | Q06787-6     | FMR1      | Isoform 5 of Synaptic functional regulator FMR1                                 |
| 1.017           | 0.983        | 0.986        | 0.901        | 0.952        | 0.974        | 0.962        | 1.037        | 0.980        | 0.962         | 0.989         | 1.018         | P06753-5     | TPM3      | Isoform 5 of Tropomyosin alpha-3 chain                                          |
| 1.046           | 1.031        | 1.046        | 0.967        | 0.996        | 1.040        | 0.986        | 1.055        | 1.061        | 1.059         | 0.993         | 1.040         | O94966-5     | USP19     | Isoform 5 of Ubiquitin carboxyl-terminal hydrolase 19                           |
| 0.999           | 1.003        | 0.993        | 0.988        | 0.987        | 0.984        | 0.967        | 0.948        | 0.993        | 0.992         | 1.070         | 1.007         | Q14157-5     | UBAP2L    | Isoform 5 of Ubiquitin-associated protein 2-like                                |
| 0.953           | 1.084        | 0.888        | 1.032        | 0.919        | 0.948        | 1.031        | 1.102        | 0.990        |               |               |               | Q9BUV8-5     | C20orf24  | Isoform 5 of Uncharacterized protein C20orf24                                   |
|                 |              |              | 0.855        | 1.112        | 1.019        |              |              |              |               |               |               | Q86VK4-5     | ZNF410    | Isoform 5 of Zinc finger protein 410                                            |
|                 |              |              | 0.817        | 0.772        | 0.803        |              |              |              |               |               |               | Q96HQ0-5     | ZNF419    | Isoform 5 of Zinc finger protein 419                                            |
| 0.834           | 0.919        | 1.228        | 0.878        | 0.637        | 1.057        |              |              |              | 1.267         | 0.981         | 1.283         | P26367-2     | PAX6      | Isoform 5a of Paired box protein Pax-6                                          |
|                 |              |              |              |              |              | 1.209        | 0.768        | 0.972        |               |               |               | P07108-6     | DBI       | Isoform 6 of Acyl-CoA-binding protein                                           |
| 0.993           | 1.014        | 1.040        | 1.037        | 0.981        | 1.005        | 1.146        | 1.031        | 1.123        | 1.076         | 1.108         | 1.038         | O95490-6     | ADGRL2    | Isoform 6 of Adhesion G protein-coupled receptor L2                             |
| 1.049           | 1.039        | 1.060        | 1.081        | 1.021        | 1.101        | 1.088        | 1.107        | 1.054        | 1.128         | 1.004         | 1.127         | O00468-6     | AGRN      | Isoform 6 of Agrin                                                              |
| 1.002           | 0.988        | 1.029        | 1.004        | 0.963        | 1.053        | 1.028        | 0.937        | 1.000        | 1.027         | 0.966         | 1.053         | Q99996-6     | AKAP9     | Isoform 6 of A-kinase anchor protein 9                                          |
| 1.018           | 0.997        | 1.034        | 1.013        | 0.996        | 1.003        | 1.023        | 1.023        | 1.026        | 0.980         | 0.946         | 1.038         | Q8IWZ3-6     | ANKHD1    | Isoform 6 of Ankyrin repeat and KH domain-containing protein 1                  |
| 0.991           | 1.004        | 0.982        | 0.996        | 0.953        | 1.008        | 1.003        | 1.053        | 0.962        | 0.972         | 0.973         | 1.005         | P56945-6     | BCAR1     | Isoform 6 of Breast cancer anti-estrogen resistance protein 1                   |
| 1.000           | 1.006        | 1.006        | 0.963        | 0.983        | 0.987        | 0.933        | 0.990        | 0.955        | 0.996         | 0.955         | 1.014         | Q13555-6     | CAMK2G    | Isoform 6 of Calcium/calmodulin-dependent protein kinase type II subunit gamma  |
| 0.956           | 0.982        | 0.992        | 0.951        | 1.003        | 0.975        | 0.918        | 0.791        | 0.943        | 1.005         | 1.013         | 1.021         | P20810-6     | CAST      | Isoform 6 of Calbastatin                                                        |

| Abundance Ratio |              |              |              |              |              |              |              |              |               |               |               | Accession ID | Gene name | Protein Description                                                         |
|-----------------|--------------|--------------|--------------|--------------|--------------|--------------|--------------|--------------|---------------|---------------|---------------|--------------|-----------|-----------------------------------------------------------------------------|
| 1 d<br>M1/C1    | 1 d<br>M2/C2 | 1 d<br>M3/C3 | 4 d<br>M1/C1 | 4 d<br>M2/C2 | 4 d<br>M3/C3 | 7 d<br>M1/C1 | 7 d<br>M2/C2 | 7 d<br>M3/C3 | 10 d<br>M1/C1 | 10 d<br>M2/C2 | 10 d<br>M3/C3 |              |           |                                                                             |
| 1.001           | 1.007        | 1.021        | 0.996        | 0.945        | 0.991        | 0.978        | 1.079        | 1.010        | 0.995         | 1.005         | 1.004         | Q9H9A5-6     | CNOT10    | Isoform 6 of CCR4-NOT transcription complex subunit 10                      |
| 1.058           | 0.963        | 1.038        | 0.998        | 1.000        | 1.001        | 0.974        | 1.104        | 1.046        | 1.005         | 1.006         | 1.077         | O95628-6     | CNOT4     | Isoform 6 of CCR4-NOT transcription complex subunit 4                       |
| 1.029           | 1.010        | 1.017        | 1.023        | 1.057        | 0.991        | 1.019        | 1.044        | 1.035        | 0.979         | 0.985         | 1.022         | Q6IA86-6     | ELP2      | Isoform 6 of Elongator complex protein 2                                    |
| 0.980           | 1.029        | 1.030        | 0.991        | 0.966        | 1.002        | 0.969        | 1.063        | 1.008        | 0.979         | 1.008         | 1.016         | Q14C86-6     | GAPVD1    | Isoform 6 of GTPase-activating protein and VPS9 domain-containing protein 1 |
| 0.983           | 0.953        | 1.006        | 1.006        | 0.928        | 1.023        | 1.036        | 1.006        | 1.024        | 1.104         | 1.047         | 1.052         | Q13308-6     | PTK7      | Isoform 6 of Inactive tyrosine-protein kinase 7                             |
| 0.996           | 0.951        | 1.032        | 1.013        | 0.957        | 0.976        | 1.014        | 1.144        | 1.008        | 1.026         | 1.018         | 1.055         | P20839-6     | IMPDH1    | Isoform 6 of Inosine-5'-monophosphate dehydrogenase 1                       |
| 1.081           | 1.099        | 1.065        | 0.984        | 0.960        | 1.007        | 1.087        | 1.170        | 1.062        | 0.991         | 0.980         | 1.099         | Q9HBG6-6     | IFT122    | Isoform 6 of Intraflagellar transport protein 122 homolog                   |
| 1.032           | 1.003        | 1.085        | 0.985        | 0.991        | 1.004        | 0.988        | 0.975        | 0.973        | 1.086         | 1.036         | 1.079         | O95819-6     | MAP4K4    | Isoform 6 of Mitogen-activated protein kinase kinase kinase 4               |
| 1.255           | 0.921        | 0.770        |              |              |              |              |              |              |               |               |               | Q8NEY8-6     | PPHLN1    | Isoform 6 of Periphilin-1                                                   |
| 1.003           | 0.933        | 0.912        | 1.072        | 1.041        | 1.009        | 0.990        | 1.019        | 0.957        | 1.074         | 0.991         | 1.045         | O94827-6     | PLEKHG5   | Isoform 6 of Pleckstrin homology domain-containing family G member 5        |
| 1.102           | 1.022        | 1.007        | 1.034        | 1.204        | 0.955        | 1.068        | 0.960        | 1.031        | 0.978         | 1.017         | 0.975         | Q15366-6     | PCBP2     | Isoform 6 of Poly(rC)-binding protein 2                                     |
| 1.013           | 1.027        | 1.031        | 1.017        | 0.948        | 1.037        | 0.996        | 1.133        | 0.974        | 0.965         | 1.081         | 1.000         | P14859-6     | POU2F1    | Isoform 6 of POU domain, class 2, transcription factor 1                    |
| 1.012           | 1.037        | 0.959        | 1.032        | 0.962        | 1.012        | 1.018        | 1.072        | 0.969        | 1.108         | 1.095         | 1.063         | Q9NQV6-6     | PRDM10    | Isoform 6 of PR domain zinc finger protein 10                               |
| 1.064           | 0.993        | 1.029        | 0.834        | 0.950        | 0.997        | 0.850        | 0.704        | 1.010        | 0.980         | 0.978         | 1.076         | Q6AWC2-6     | WWC2      | Isoform 6 of Protein WWC2                                                   |
| 1.044           | 1.017        | 1.054        | 0.982        | 0.947        | 1.072        | 1.007        | 0.980        | 1.014        | 1.008         | 0.967         | 1.055         | Q8N1W1-6     | ARHGEF28  | Isoform 6 of Rho guanine nucleotide exchange factor 28                      |
| 1.038           | 1.047        | 0.998        | 1.005        | 0.917        | 1.024        | 0.990        | 1.044        | 1.008        | 1.053         | 1.013         | 1.032         | Q7LG56-6     | RRM2B     | Isoform 6 of Ribonucleoside-diphosphate reductase subunit M2 B              |
| 0.999           | 0.931        | 1.019        | 0.973        | 0.928        | 0.982        | 1.003        | 1.006        | 1.017        | 1.044         | 0.907         | 1.054         | Q5VT25-6     | CDC42BPA  | Isoform 6 of Serine/threonine-protein kinase MRCK alpha                     |
| 0.994           | 1.006        | 1.019        | 0.997        | 0.981        | 1.013        | 1.026        | 1.009        | 0.992        | 1.035         | 1.010         | 1.046         | Q9H4A3-7     | WNK1      | Isoform 6 of Serine/threonine-protein kinase WNK1                           |
| 1.056           | 1.008        | 1.016        | 1.038        | 0.981        | 1.005        | 1.016        | 1.051        | 0.985        | 0.967         | 1.048         | 0.967         | P29353-6     | SHC1      | Isoform 6 of SHC-transforming protein 1                                     |
| 1.012           | 1.029        | 1.200        | 0.967        | 0.962        | 1.034        |              |              |              |               |               |               | Q9HB58-6     | SP110     | Isoform 6 of Sp110 nuclear body protein                                     |
|                 |              |              | 1.101        | 0.956        | 0.918        | 0.964        | 1.196        | 0.918        | 0.983         | 1.170         | 0.938         | Q9NWM0-6     | SMOX      | Isoform 6 of Spermine oxidase                                               |
| 1.004           | 1.160        | 0.997        | 1.142        | 1.516        | 0.896        | 1.054        | 1.071        | 1.167        | 1.023         | 1.053         | 0.964         | Q15637-6     | SF1       | Isoform 6 of Splicing factor 1                                              |
|                 |              |              | 1.028        | 1.021        | 1.181        |              |              |              |               |               |               | P24821-6     | TNC       | Isoform 6 of Tenascin                                                       |
| 0.984           | 0.933        | 1.031        | 0.931        | 0.952        | 1.022        | 0.932        | 1.021        | 1.011        | 1.000         | 0.958         | 1.008         | O00142-6     | TK2       | Isoform 6 of Thymidine kinase 2, mitochondrial                              |
| 1.035           | 0.983        | 1.044        | 0.977        | 0.955        | 0.992        | 0.956        | 0.896        | 0.980        | 0.989         | 0.997         | 1.003         | P06753-6     | TPM3      | Isoform 6 of Tropomyosin alpha-3 chain                                      |

| Abundance Ratio |              |              |              |              |              |              |              |              |               |               |               | Accession ID | Gene name | Protein Description                                             |
|-----------------|--------------|--------------|--------------|--------------|--------------|--------------|--------------|--------------|---------------|---------------|---------------|--------------|-----------|-----------------------------------------------------------------|
| 1 d<br>M1/C1    | 1 d<br>M2/C2 | 1 d<br>M3/C3 | 4 d<br>M1/C1 | 4 d<br>M2/C2 | 4 d<br>M3/C3 | 7 d<br>M1/C1 | 7 d<br>M2/C2 | 7 d<br>M3/C3 | 10 d<br>M1/C1 | 10 d<br>M2/C2 | 10 d<br>M3/C3 |              |           |                                                                 |
| 0.999           | 1.036        | 0.999        | 1.072        | 1.052        | 1.032        | 1.010        | 1.029        | 0.943        | 0.822         | 0.837         | 1.041         | Q7Z589-7     | EMSY      | Isoform 7 of BRCA2-interacting transcriptional repressor EMSY   |
| 0.935           | 1.013        | 1.096        |              |              |              | 1.074        | 1.197        | 1.261        |               |               |               | P38398-7     | BRCA1     | Isoform 7 of Breast cancer type 1 susceptibility protein        |
| 0.986           | 0.990        | 0.998        | 0.978        | 1.004        | 0.997        | 0.981        | 0.975        | 0.998        | 0.972         | 1.016         | 0.963         | Q12906-7     | ILF3      | Isoform 7 of Interleukin enhancer-binding factor 3              |
| 0.973           | 0.930        | 0.990        | 0.960        | 0.890        | 1.011        | 1.082        | 1.076        | 0.997        | 1.026         | 0.996         | 1.040         | Q6P1Q0-7     | LETMD1    | Isoform 7 of LETM1 domain-containing protein 1                  |
| 1.028           | 0.999        | 0.990        | 1.009        | 0.999        | 0.984        | 0.966        | 1.021        | 0.983        | 0.990         | 0.988         | 1.006         | P22570-7     | FDXR      | Isoform 7 of NADPH:adrenodoxin oxidoreductase, mitochondrial    |
| 1.106           | 1.086        | 1.291        | 1.044        | 1.158        | 1.054        | 1.088        | 0.974        | 1.004        | 1.001         | 1.073         | 1.059         | Q14693-7     | LPIN1     | Isoform 7 of Phosphatidate phosphatase LPIN1                    |
| 1.056           | 0.984        | 1.013        | 0.961        | 1.099        | 1.049        |              |              |              |               |               |               | Q8NDX5-7     | PHC3      | Isoform 7 of Polyhomeotic-like protein 3                        |
| 1.061           | 1.114        | 1.116        | 0.945        | 1.130        | 1.016        | 1.062        | 1.174        | 1.123        | 1.015         | 0.949         | 1.183         | Q9Y2Z2-6     | MTO1      | Isoform 7 of Protein MTO1 homolog, mitochondrial                |
| 1.074           | 1.023        | 0.980        | 0.976        | 1.052        | 0.964        | 1.057        | 0.991        | 0.962        | 1.087         | 1.104         | 1.194         | Q13438-7     | OS9       | Isoform 7 of Protein OS-9                                       |
| 0.991           | 1.014        | 1.003        | 0.985        | 0.990        | 0.995        | 0.983        | 0.912        | 0.969        | 1.020         | 1.014         | 1.048         | Q9Y520-7     | PRRC2C    | Isoform 7 of Protein PRRC2C                                     |
| 0.953           | 1.027        | 1.056        | 1.038        | 0.932        | 1.080        | 1.089        | 1.086        | 1.018        | 1.082         | 1.048         | 1.132         | Q9Y6M7-7     | SLC4A7    | Isoform 7 of Sodium bicarbonate cotransporter 3                 |
| 0.984           | 0.994        | 0.965        | 0.996        | 1.004        | 0.977        | 0.978        | 1.001        | 1.009        | 0.950         | 0.972         | 0.985         | O43399-7     | TPD52L2   | Isoform 7 of Tumor protein D54                                  |
| 1.087           | 0.954        | 0.811        |              |              |              |              |              |              |               |               |               | O75771-8     | RAD51D    | Isoform 8 of DNA repair protein RAD51 homolog 4                 |
| 0.981           | 1.015        | 1.035        | 0.996        | 0.940        | 1.043        | 1.004        | 0.958        | 1.056        | 1.056         | 0.997         | 1.139         | Q96RT1-8     | ERBIN     | Isoform 8 of Erbin                                              |
| 0.900           | 0.972        | 0.979        | 0.957        | 1.091        | 1.079        | 1.009        | 1.026        | 1.075        | 1.122         | 1.014         | 1.095         | Q04637-8     | EIF4G1    | Isoform 8 of Eukaryotic translation initiation factor 4 gamma 1 |
| 0.988           | 0.995        | 0.989        | 0.988        | 1.020        | 0.960        | 0.964        | 0.990        | 0.975        | 0.937         | 0.963         | 0.932         | O75369-8     | FLNB      | Isoform 8 of Filamin-B                                          |
| 1.102           | 0.965        | 1.054        |              |              |              |              |              |              | 1.045         | 0.993         | 0.987         | Q15149-8     | PLEC      | Isoform 8 of Plectin                                            |
| 0.943           | 0.984        | 0.977        | 0.963        | 0.982        | 1.052        | 0.975        | 1.011        | 1.026        | 1.012         | 1.039         | 1.093         | O43251-8     | RBFOX2    | Isoform 8 of RNA binding protein fox-1 homolog 2                |
| 1.036           | 1.028        | 1.023        | 1.010        | 0.961        | 1.006        | 0.952        | 0.989        | 0.981        | 0.991         | 1.042         | 0.994         | Q06787-8     | FMR1      | Isoform 8 of Synaptic functional regulator FMR1                 |
| 1.054           | 1.014        | 1.013        | 0.978        | 1.000        | 1.028        | 0.978        | 1.055        | 1.006        | 0.956         | 0.933         | 0.995         | Q9NVH6-8     | TMLHE     | Isoform 8 of Trimethyllysine dioxygenase, mitochondrial         |
| 1.012           | 1.004        | 1.013        | 1.008        | 0.918        | 0.981        | 1.035        | 1.039        | 1.017        | 1.010         | 0.963         | 1.058         | Q86UV5-8     | USP48     | Isoform 8 of Ubiquitin carboxyl-terminal hydrolase 48           |
| 1.011           | 0.991        | 1.014        | 1.026        | 1.061        | 0.997        | 1.039        | 0.997        | 1.052        | 1.000         | 0.964         | 1.019         | Q14790-9     | CASP8     | Isoform 9 of Caspase-8                                          |
| 0.971           | 1.005        | 1.025        | 0.996        | 0.979        | 1.017        | 0.994        | 0.993        | 1.008        | 0.952         | 1.010         | 1.000         | Q04637-9     | EIF4G1    | Isoform 9 of Eukaryotic translation initiation factor 4 gamma 1 |
| 1.047           | 1.008        | 1.051        | 0.981        | 1.019        | 1.020        | 1.014        | 0.921        | 1.007        | 1.008         | 1.070         | 1.102         | Q9UIS9-9     | MBD1      | Isoform 9 of Methyl-CpG-binding domain protein 1                |
| 0.995           | 0.980        | 1.013        | 1.015        | 0.901        | 1.014        | 0.982        | 1.067        | 1.027        | 0.994         | 1.024         | 1.078         | P33527-9     | ABCC1     | Isoform 9 of Multidrug resistance-associated protein 1          |
| 0.936           | 0.962        | 0.982        | 0.950        | 0.962        | 1.041        | 0.938        | 0.899        | 0.953        | 1.006         | 0.944         | 1.064         | O96017-9     | CHEK2     | Isoform 9 of Serine/threonine-protein kinase Chk2               |

| Abundance Ratio |              |              |              |              |              |              |              |              |               |               |               | Accession ID | Gene name | Protein Description                                                        |
|-----------------|--------------|--------------|--------------|--------------|--------------|--------------|--------------|--------------|---------------|---------------|---------------|--------------|-----------|----------------------------------------------------------------------------|
| 1 d<br>M1/C1    | 1 d<br>M2/C2 | 1 d<br>M3/C3 | 4 d<br>M1/C1 | 4 d<br>M2/C2 | 4 d<br>M3/C3 | 7 d<br>M1/C1 | 7 d<br>M2/C2 | 7 d<br>M3/C3 | 10 d<br>M1/C1 | 10 d<br>M2/C2 | 10 d<br>M3/C3 |              |           |                                                                            |
| 1.000           | 0.985        | 1.040        | 0.976        | 0.904        | 1.043        | 0.982        | 1.047        | 0.981        | 1.053         | 1.041         | 1.017         | O94901-9     | SUN1      | Isoform 9 of SUN domain-containing protein 1                               |
| 0.997           | 1.016        | 0.988        | 0.992        | 0.990        | 1.012        | 1.000        | 1.041        | 1.002        | 1.017         | 1.007         | 1.000         | P46937-9     | YAP1      | Isoform 9 of Transcriptional coactivator YAP1                              |
| 1.083           | 1.027        | 1.212        |              |              |              | 1.073        | 1.081        | 1.123        |               |               |               | P53367-2     | ARFIP1    | Isoform A of Arfaptin-1                                                    |
| 1.029           | 0.987        | 1.047        | 1.002        | 0.978        | 1.017        | 0.979        | 1.078        | 1.042        | 0.953         | 0.995         | 1.005         | O60888-2     | CUTA      | Isoform A of Protein CutA                                                  |
| 1.020           | 0.985        | 1.071        | 0.990        | 0.905        | 1.045        | 0.925        | 0.999        | 1.015        | 0.939         | 0.928         | 1.086         | O14662-2     | STX16     | Isoform A of Syntaxin-16                                                   |
|                 |              |              | 1.238        | 0.982        | 0.487        | 1.877        | 1.508        | 0.695        |               |               |               | P09651-2     | HNRNPA1   | Isoform A1-A of Heterogeneous nuclear ribonucleoprotein A1                 |
| 1.016           | 1.051        | 0.995        | 1.076        | 1.036        | 1.026        | 0.985        | 1.059        | 1.054        | 0.932         | 0.953         | 1.009         | P55210-3     | CASP7     | Isoform Alpha' of Caspase-7                                                |
|                 |              |              |              |              |              | 1.055        | 1.650        | 0.933        |               |               |               | Q92692-2     | NECTIN2   | Isoform Alpha of Nectin-2                                                  |
| 1.058           | 1.054        | 0.959        | 1.122        | 1.189        | 1.069        | 1.268        | 1.151        | 1.291        | 1.095         | 0.692         | 0.971         | Q13033-2     | STRN3     | Isoform Alpha of Striatin-3                                                |
| 1.010           | 1.017        | 1.063        | 0.936        | 1.022        | 0.968        | 0.959        | 1.076        | 1.005        | 0.941         | 0.949         | 1.033         | P04150-3     | NR3C1     | Isoform Alpha-2 of Glucocorticoid receptor                                 |
|                 |              |              | 1.121        | 0.981        | 1.104        |              |              |              |               |               |               | P09471-2     | GNAO1     | Isoform Alpha-2 of Guanine nucleotide-binding protein G(o) subunit alpha   |
|                 |              |              |              |              |              |              |              |              | 0.948         | 0.856         | 1.041         | Q01196-8     | RUNX1     | Isoform AML-1G of Runt-related transcription factor 1                      |
| 0.995           | 0.977        | 0.790        | 0.913        | 0.990        | 1.142        | 1.271        | 0.911        | 0.967        | 1.066         | 1.093         | 1.177         | O15265-2     | ATXN7     | Isoform b of Ataxin-7                                                      |
| 1.036           | 0.995        | 1.027        | 1.069        | 1.061        | 1.040        | 1.084        | 1.010        | 1.048        | 1.087         | 1.009         | 1.065         | O95340-2     | PAPSS2    | Isoform B of Bifunctional 3'-phosphoadenosine 5'-phosphosulfate synthase 2 |
| 1.067           | 1.045        | 0.958        | 1.078        | 1.016        | 1.003        | 1.048        | 0.997        | 0.938        | 1.017         | 0.889         | 0.995         | O75190-2     | DNAJB6    | Isoform B of DnaJ homolog subfamily B member 6                             |
| 0.912           | 0.968        | 0.941        | 0.972        | 0.979        | 1.013        | 1.096        | 0.944        | 1.033        | 1.095         | 1.073         | 1.104         | P15529-2     | CD46      | Isoform B of Membrane cofactor protein                                     |
| 0.995           | 1.008        | 1.023        | 0.978        | 0.986        | 1.036        | 0.996        | 0.979        | 0.984        | 1.040         | 1.026         | 1.016         | P51608-2     | MECP2     | Isoform B of Methyl-CpG-binding protein 2                                  |
| 1.032           | 0.996        | 1.028        | 1.012        | 1.074        | 1.019        | 0.984        | 0.962        | 1.033        | 1.021         | 1.004         | 1.014         | Q96EE3-1     | SEH1L     | Isoform B of Nucleoporin SEH1                                              |
| 0.953           | 0.987        | 0.933        | 0.982        | 0.882        | 0.992        | 0.977        | 1.084        | 1.001        | 0.998         | 1.062         | 0.917         | Q00325-2     | SLC25A3   | Isoform B of Phosphate carrier protein, mitochondrial                      |
|                 |              |              |              |              |              |              |              |              | 0.834         | 0.953         | 1.021         | Q9UN86-2     | G3BP2     | Isoform B of Ras GTPase-activating protein-binding protein 2               |
| 1.130           | 1.256        | 1.236        | 1.091        | 0.981        | 0.897        |              |              |              |               |               |               | P61812-2     | TGFB2     | Isoform B of Transforming growth factor beta-2                             |
| 0.947           | 0.957        | 1.085        | 1.039        | 0.946        | 0.982        | 1.007        | 0.960        | 0.963        | 0.925         | 0.888         | 1.114         | P53814-5     | SMTN      | Isoform B2 of Smoothelin                                                   |
| 0.902           | 1.025        | 0.968        | 0.972        | 1.061        | 1.021        | 0.953        | 1.159        | 1.003        | 1.013         | 1.202         | 1.053         | Q07812-2     | BAX       | Isoform Beta of Apoptosis regulator BAX                                    |
|                 |              |              | 0.909        | 0.898        | 0.847        |              |              |              |               |               |               | Q9UPN9-2     | TRIM33    | Isoform Beta of E3 ubiquitin-protein ligase TRIM33                         |
| 1.012           | 0.970        | 1.010        | 0.953        | 0.985        | 1.028        | 0.977        | 0.866        | 0.940        | 0.941         | 1.021         | 0.977         | Q14978-2     | NOLC1     | Isoform Beta of Nucleolar and coiled-body phosphoprotein 1                 |
| 1.022           | 1.003        | 0.995        | 0.997        | 1.047        | 1.010        | 1.028        | 1.008        | 1.011        | 1.004         | 0.973         | 1.008         | Q02880-2     | TOP2B     | Isoform Beta-1 of DNA topoisomerase 2-beta                                 |
|                 |              |              | 1.176        | 0.844        | 1.015        |              |              |              |               |               |               | O75688-2     | PPM1B     | Isoform Beta-2 of Protein phosphatase 1B                                   |
| 2.173           | 1.016        | 1.110        | 1.146        | 2.090        | 0.801        | 0.990        | 0.829        | 1.046        | 0.924         | 1.043         | 0.829         | Q10567-3     | AP1B1     | Isoform C of AP-1 complex subunit beta-1                                   |
| 0.881           | 0.799        | 1.192        | 1.012        | 0.972        | 0.998        | 0.950        | 0.945        | 0.893        |               |               |               | P02545-2     | LMNA      | Isoform C of Prelamin-A/C                                                  |



| Abundance Ratio |              |              |              |              |              |              |              |              |               |               |               | Accession ID | Gene name | Protein Description                                                                                |
|-----------------|--------------|--------------|--------------|--------------|--------------|--------------|--------------|--------------|---------------|---------------|---------------|--------------|-----------|----------------------------------------------------------------------------------------------------|
| 1 d<br>M1/C1    | 1 d<br>M2/C2 | 1 d<br>M3/C3 | 4 d<br>M1/C1 | 4 d<br>M2/C2 | 4 d<br>M3/C3 | 7 d<br>M1/C1 | 7 d<br>M2/C2 | 7 d<br>M3/C3 | 10 d<br>M1/C1 | 10 d<br>M2/C2 | 10 d<br>M3/C3 |              |           |                                                                                                    |
| 1.153           | 1.149        | 0.991        | 0.971        | 0.934        | 1.023        | 1.044        | 1.179        | 1.059        | 1.032         | 1.023         | 0.997         | Q9NS23-4     | RASSF1    | Isoform C of Ras association domain-containing protein 1                                           |
| 1.064           | 1.032        | 0.967        | 1.004        | 0.997        | 0.969        | 1.011        | 1.143        | 1.000        | 1.021         | 1.030         | 0.960         | Q93062-3     | RBPMS     | Isoform C of RNA-binding protein with multiple splicing                                            |
| 1.047           | 0.991        | 1.016        | 0.974        | 0.953        | 1.010        | 0.951        | 0.955        | 0.979        | 0.976         | 1.007         | 0.957         | P07910-2     | HNRNPC    | Isoform C1 of Heterogeneous nuclear ribonucleoproteins C1/C2                                       |
| 1.052           | 1.012        | 1.053        | 1.044        | 1.037        | 1.002        | 1.025        | 1.014        | 1.000        | 1.000         | 0.937         | 1.034         | Q7Z6K5-2     | ARPIN     | Isoform C15orf38-AP3S2 of Arpin                                                                    |
| 1.484           | 1.086        | 0.966        | 1.112        | 0.915        | 0.899        | 0.941        | 1.010        | 0.955        | 0.838         | 1.006         | 0.741         | P46108-2     | CRK       | Isoform Crk-I of Adapter molecule crk                                                              |
| 1.070           | 1.019        | 0.991        | 0.978        | 0.936        | 0.912        | 1.093        | 1.152        | 0.998        | 1.002         | 0.967         | 1.019         | Q16539-2     | MAPK14    | Isoform CSBP1 of Mitogen-activated protein kinase 14                                               |
| 0.954           | 0.975        | 0.984        | 0.935        | 0.966        | 0.976        | 0.928        | 0.902        | 0.966        | 1.002         | 0.979         | 1.030         | O94916-4     | NFAT5     | Isoform D of Nuclear factor of activated T-cells 5                                                 |
| 0.993           | 0.985        | 1.013        | 1.001        | 0.979        | 1.039        | 1.005        | 0.999        | 1.012        | 1.030         | 0.989         | 1.049         | P18583-5     | SON       | Isoform D of Protein SON                                                                           |
| 1.318           | 1.017        | 1.019        | 0.780        | 1.279        | 0.962        | 0.949        | 0.913        | 1.084        |               |               |               | O00273-2     | DFFA      | Isoform DFF35 of DNA fragmentation factor subunit alpha                                            |
| 0.938           | 0.930        | 0.968        | 0.993        | 1.033        | 0.941        |              |              |              |               |               |               | O94916-5     | NFAT5     | Isoform E of Nuclear factor of activated T-cells 5                                                 |
| 0.985           | 1.135        | 0.832        | 0.860        | 0.877        | 1.049        | 0.806        | 0.995        | 1.102        |               |               |               | P18583-6     | SON       | Isoform E of Protein SON                                                                           |
| 1.025           | 1.022        | 1.000        | 1.019        | 0.974        | 0.973        | 1.010        | 1.039        | 1.006        | 1.042         | 1.029         | 1.017         | Q9NZB2-6     | FAM120A   | Isoform F of Constitutive coactivator of PPAR-gamma-like protein 1                                 |
| 1.090           | 0.976        | 1.202        | 0.917        | 1.063        | 1.061        | 0.780        | 0.757        | 1.052        | 1.045         | 0.908         | 1.124         | Q07866-3     | KLC1      | Isoform G of Kinesin light chain 1                                                                 |
| 0.945           | 0.896        | 1.041        | 0.914        | 0.902        | 1.024        | 1.004        | 0.832        | 0.941        | 1.134         | 1.035         | 1.138         | P42167-2     | TMPO      | Isoform Gamma of Lamina-associated polypeptide 2, isoforms beta/gamma                              |
| 0.919           | 0.948        | 0.919        |              |              |              | 0.905        | 1.031        | 1.068        | 1.093         | 0.973         | 1.056         | Q13362-2     | PPP2R5C   | Isoform Gamma-1 of Serine/threonine-protein phosphatase 2A 56 kDa regulatory subunit gamma isoform |
| 0.975           | 1.002        | 1.024        | 1.032        | 0.932        | 1.086        | 1.028        | 1.031        | 1.065        | 1.022         | 1.006         | 1.023         | P36873-2     | PPP1CC    | Isoform Gamma-2 of Serine/threonine-protein phosphatase PP1-gamma catalytic subunit                |
| 1.088           | 0.787        | 0.879        | 0.919        | 0.870        | 0.984        |              |              |              |               |               |               | P63092-2     | GNAS      | Isoform Gnas-2 of Guanine nucleotide-binding protein G(s) subunit alpha isoforms short             |
|                 |              |              | 0.906        | 1.000        | 1.417        | 0.872        | 0.794        | 0.894        | 1.033         | 1.049         | 1.124         | P43250-2     | GRK6      | Isoform GRK6B of G protein-coupled receptor kinase 6                                               |
| 0.973           | 1.009        | 0.972        | 0.986        | 1.013        | 0.998        | 0.997        | 0.983        | 0.996        | 1.000         | 0.986         | 0.979         | P36542-2     | ATP5C1    | Isoform Heart of ATP synthase subunit gamma, mitochondrial                                         |
| 1.019           | 0.922        | 0.987        | 0.746        | 0.853        | 0.975        | 0.808        | 0.626        | 0.785        | 1.120         | 0.798         | 0.751         | P17096-2     | HMGA1     | Isoform HMG-Y of High mobility group protein HMG-I/HMG-Y                                           |
| 1.018           | 0.972        | 0.970        | 0.990        | 0.932        | 1.044        | 0.899        | 0.953        | 1.015        | 0.802         | 1.251         | 0.867         | P00519-2     | ABL1      | Isoform IB of Tyrosine-protein kinase ABL1                                                         |
| 1.090           | 0.976        | 1.019        | 0.991        | 0.929        | 1.024        | 0.965        | 1.167        | 1.026        | 1.064         | 1.060         | 1.007         | Q9P2H3-3     | IFT80     | Isoform IFT80-L of Intraflagellar transport protein 80 homolog                                     |
| 0.998           | 0.988        | 0.994        | 0.992        | 1.005        | 0.998        | 0.988        | 1.000        | 1.001        | 1.014         | 0.968         | 1.045         | O00499-2     | BIN1      | Isoform IIB of Myc box-dependent-interacting protein 1                                             |

| Abundance Ratio |              |              |              |              |              |              |              |              |               |               |               | Accession ID | Gene name | Protein Description                                                                 |
|-----------------|--------------|--------------|--------------|--------------|--------------|--------------|--------------|--------------|---------------|---------------|---------------|--------------|-----------|-------------------------------------------------------------------------------------|
| 1 d<br>M1/C1    | 1 d<br>M2/C2 | 1 d<br>M3/C3 | 4 d<br>M1/C1 | 4 d<br>M2/C2 | 4 d<br>M3/C3 | 7 d<br>M1/C1 | 7 d<br>M2/C2 | 7 d<br>M3/C3 | 10 d<br>M1/C1 | 10 d<br>M2/C2 | 10 d<br>M3/C3 |              |           |                                                                                     |
| 0.977           | 1.002        | 0.983        | 0.986        | 1.041        | 0.974        | 1.051        | 1.024        | 1.016        | 1.025         | 1.024         | 1.027         | Q14195-2     | DPYSL3    | Isoform LCRMP-4 of Dihydropyrimidinase-related protein 3                            |
| 1.016           | 1.009        | 0.975        | 1.014        | 1.032        | 0.998        | 1.010        | 1.019        | 0.997        | 1.056         | 1.011         | 0.993         | P11413-2     | G6PD      | Isoform Long of Glucose-6-phosphate 1-dehydrogenase                                 |
| 0.995           | 1.002        | 0.986        | 1.000        | 0.992        | 0.976        | 0.982        | 1.004        | 0.985        | 1.003         | 0.992         | 0.996         | P25786-2     | PSMA1     | Isoform Long of Proteasome subunit alpha type-1                                     |
| 0.988           | 0.986        | 1.009        | 0.961        | 0.965        | 0.960        | 0.965        | 0.988        | 0.960        | 1.006         | 0.998         | 1.044         | Q92890-1     | UFD1      | Isoform Long of Ubiquitin recognition factor in ER-associated degradation protein 1 |
| 1.028           | 0.876        | 1.018        | 0.949        | 0.880        | 1.085        | 1.171        | 1.168        | 1.356        | 1.025         | 0.847         | 1.011         | P14618-2     | PKM       | Isoform M1 of Pyruvate kinase PKM                                                   |
| 0.670           | 0.939        | 0.915        | 1.002        | 0.930        | 1.111        | 0.991        | 0.880        | 0.989        | 0.979         | 1.028         | 0.937         | P06733-2     | ENO1      | Isoform MBP-1 of Alpha-enolase                                                      |
| 1.067           | 0.972        | 1.007        | 0.944        | 0.954        | 1.099        | 0.974        | 1.029        | 1.060        | 1.087         | 1.146         | 1.085         | Q14814-4     | MEF2D     | Isoform MEF2DA0 of Myocyte-specific enhancer factor 2D                              |
| 0.983           | 0.911        | 1.002        | 0.969        | 0.956        | 1.028        | 1.076        | 1.059        | 1.025        | 0.989         | 1.012         | 0.976         | P54136-2     | RARS      | Isoform Monomeric of Arginine--tRNA ligase, cytoplasmic                             |
| 0.995           | 0.996        | 0.988        | 1.026        | 1.053        | 1.011        | 1.017        | 1.021        | 1.021        | 1.021         | 1.021         | 1.001         | Q07866-6     | KLC1      | Isoform N of Kinesin light chain 1                                                  |
| 1.038           | 0.991        | 0.997        | 0.994        | 1.079        | 0.991        | 0.993        | 0.882        | 1.014        | 1.017         | 0.993         | 0.987         | P09496-2     | CLTA      | Isoform Non-brain of Clathrin light chain A                                         |
| 0.986           | 0.977        | 1.022        | 0.989        | 0.967        | 1.029        | 0.989        | 0.902        | 1.008        | 0.980         | 1.027         | 1.008         | P09497-2     | CLTB      | Isoform Non-brain of Clathrin light chain B                                         |
| 0.999           | 1.017        | 1.067        | 1.027        | 0.984        | 1.027        | 1.013        | 1.022        | 0.994        | 1.005         | 0.968         | 1.026         | Q9Y446-2     | PKP3      | Isoform PKP3b of Plakophilin-3                                                      |
|                 |              |              |              |              |              |              |              |              | 1.094         | 0.994         | 1.216         | P29590-3     | PML       | Isoform PML-8 of Protein PML                                                        |
| 1.011           | 1.003        | 1.012        | 1.001        | 0.999        | 0.989        | 1.009        | 1.018        | 1.026        | 1.039         | 0.971         | 1.056         | Q12979-2     | ABR       | Isoform Short of Active breakpoint cluster region-related protein                   |
| 1.059           | 1.001        | 1.017        | 1.058        | 1.133        | 0.989        | 1.051        | 0.970        | 1.098        | 1.022         | 1.004         | 1.041         | Q15056-2     | EIF4H     | Isoform Short of Eukaryotic translation initiation factor 4H                        |
| 0.693           | 0.847        | 1.105        | 0.588        | 1.344        | 1.045        | 0.928        | 0.395        | 1.063        | 1.182         | 0.849         | 1.430         | Q00839-2     | HNRNPU    | Isoform Short of Heterogeneous nuclear ribonucleoprotein U                          |
| 1.270           | 1.102        | 0.698        |              |              |              |              |              |              |               |               |               | P23246-2     | SFPQ      | Isoform Short of Splicing factor, proline- and glutamine-rich                       |
| 1.004           | 0.988        | 0.995        | 1.003        | 1.059        | 1.010        | 1.024        | 0.990        | 1.017        | 0.980         | 1.010         | 0.966         | P14678-3     | SNRPB     | Isoform SM-B1 of Small nuclear ribonucleoprotein-associated proteins B and B'       |
| 0.969           | 1.002        | 1.011        | 0.989        | 0.983        | 0.977        | 1.005        | 0.992        | 0.975        | 0.995         | 0.959         | 1.017         | O95425-3     | SVIL      | Isoform SV3 of Supervillin                                                          |
| 1.024           | 0.976        | 0.955        | 1.012        | 1.026        | 0.971        | 1.023        | 1.000        | 1.243        |               |               |               | P10636-5     | MAPT      | Isoform Tau-C of Microtubule-associated protein tau                                 |
|                 |              |              |              |              |              | 0.938        | 1.560        | 1.357        | 1.126         | 0.883         | 0.822         | Q9BX59-7     | TAPBPL    | Isoform zeta of Tapasin-related protein                                             |
| 0.992           | 0.997        | 1.016        | 0.994        | 0.968        | 0.982        | 0.980        | 1.025        | 0.996        | 0.957         | 0.977         | 0.954         | P41252       | IARS      | Isoleucine--tRNA ligase, cytoplasmic                                                |
| 0.988           | 0.998        | 0.978        | 0.988        | 1.007        | 0.970        | 0.984        | 1.017        | 0.984        | 0.991         | 0.987         | 0.962         | Q9NSE4       | IARS2     | Isoleucine--tRNA ligase, mitochondrial                                              |
| 0.955           | 1.004        | 0.988        | 1.015        | 0.963        | 1.010        | 1.016        | 1.032        | 0.978        | 1.082         | 0.987         | 1.013         | A0A0A0MT83   | IVD       | Isovaleryl-CoA dehydrogenase, mitochondrial                                         |
| 1.067           | 0.740        | 0.923        | 1.043        | 1.028        | 0.959        | 0.857        | 1.171        | 1.139        | 0.993         | 1.043         | 0.980         | P0C870       | JMJ7D     | JmjC domain-containing protein 7                                                    |
|                 |              |              | 0.920        | 0.916        | 0.987        | 0.970        | 0.964        | 1.087        | 1.178         | 0.984         | 0.957         | Q8N157       | AHI1      | Joubertin                                                                           |
| 1.053           | 0.952        | 1.087        | 1.053        | 0.958        | 1.010        | 0.957        | 1.081        | 1.011        | 1.197         | 0.900         | 1.146         | Q86XJ5       | JRK       | JRK protein                                                                         |

| Abundance Ratio |              |              |              |              |              |              |              |              |               |               |               | Accession ID | Gene name | Protein Description                              |
|-----------------|--------------|--------------|--------------|--------------|--------------|--------------|--------------|--------------|---------------|---------------|---------------|--------------|-----------|--------------------------------------------------|
| 1 d<br>M1/C1    | 1 d<br>M2/C2 | 1 d<br>M3/C3 | 4 d<br>M1/C1 | 4 d<br>M2/C2 | 4 d<br>M3/C3 | 7 d<br>M1/C1 | 7 d<br>M2/C2 | 7 d<br>M3/C3 | 10 d<br>M1/C1 | 10 d<br>M2/C2 | 10 d<br>M3/C3 |              |           |                                                  |
| 0.939           | 1.004        | 1.011        | 0.983        | 0.996        | 0.964        | 0.999        | 1.045        | 0.996        | 0.975         | 0.973         | 1.000         | P14923       | JUP       | Junction plakoglobin                             |
| 0.947           | 0.978        | 0.980        | 0.964        | 0.894        | 0.991        | 0.989        | 1.116        | 1.016        | 1.067         | 1.001         | 1.070         | Q9Y624       | F11R      | Junctional adhesion molecule A                   |
| 0.873           | 0.914        | 1.144        | 0.996        | 0.930        | 0.948        | 0.945        | 0.861        | 0.980        | 1.000         | 0.960         | 1.089         | Q8N9B5       | JMY       | Junction-mediating and -regulatory protein       |
| 1.061           | 0.999        | 1.037        | 0.965        | 1.010        | 1.003        | 0.974        | 1.057        | 1.021        | 0.972         | 0.995         | 1.003         | Q9BWU0       | SLC4A1AP  | Kanadaplin                                       |
| 1.179           | 1.022        | 1.063        | 0.934        | 1.101        | 1.033        | 0.860        | 1.163        | 1.020        | 0.814         | 0.990         | 1.052         | Q9Y664       | KPTN      | Kaplin                                           |
| 1.048           | 0.956        | 1.106        |              |              |              |              |              |              | 1.024         | 0.891         | 1.025         | A0A0G2JNT7   | KANSL1    | KAT8 regulatory NSL complex subunit 1            |
| 1.016           | 1.115        | 0.880        | 1.462        | 0.834        | 1.027        | 1.192        | 0.841        | 1.306        | 1.056         | 1.070         | 1.113         | F8VX10       | KANSL2    | KAT8 regulatory NSL complex subunit 2            |
| 0.922           | 1.053        | 1.041        | 0.996        | 0.853        | 0.879        | 1.075        | 1.038        | 1.016        |               |               |               | Q9P2N6       | KANSL3    | KAT8 regulatory NSL complex subunit 3            |
| 1.015           | 1.028        | 1.003        | 1.045        | 1.061        | 0.974        | 1.155        | 0.901        | 0.930        | 0.944         | 0.978         | 0.869         | O75449       | KATNA1    | Katanin p60 ATPase-containing subunit A1         |
| 1.039           | 0.993        | 0.952        | 1.051        | 0.846        | 0.912        | 0.883        | 1.123        | 1.145        | 0.971         | 0.971         | 1.079         | Q9BW62       | KATNAL1   | Katanin p60 ATPase-containing subunit A-like 1   |
| 0.951           | 0.961        | 1.027        | 1.025        | 1.010        | 1.040        | 1.011        | 1.082        | 1.080        | 0.977         | 0.998         | 1.048         | Q9BVA0       | KATNB1    | Katanin p80 WD40 repeat-containing subunit B1    |
| 0.988           | 0.907        | 0.975        | 0.952        | 0.886        | 1.015        | 0.932        | 0.906        | 1.066        |               |               |               | Q6UW63       | KDEL1     | KDEL motif-containing protein 1                  |
| 1.005           | 1.010        | 1.037        | 1.047        | 0.992        | 1.007        | 0.991        | 1.086        | 1.017        | 0.961         | 0.982         | 0.976         | Q7Z4H8       | KDEL2     | KDEL motif-containing protein 2                  |
|                 |              |              |              |              |              |              |              |              | 0.984         | 0.893         | 1.177         | G3V5V5       | KLHDC1    | Kelch domain-containing protein 1 (Fragment)     |
| 1.172           | 0.987        | 1.044        | 0.989        | 0.929        | 0.976        | 0.926        | 1.156        | 0.892        |               |               |               | Q6PID8       | KLHDC10   | Kelch domain-containing protein 10               |
|                 |              |              |              |              |              | 0.720        | 0.755        | 1.189        | 0.900         | 0.891         | 1.684         | Q9Y2U9       | KLHDC2    | Kelch domain-containing protein 2                |
| 1.126           | 1.035        | 0.993        |              |              |              | 0.914        | 1.008        | 1.068        | 0.869         | 1.093         | 0.953         | E7ERR0       | KLHDC3    | Kelch domain-containing protein 3                |
| 0.972           | 1.008        | 0.979        | 0.987        | 0.925        | 1.015        | 1.043        | 1.027        | 0.985        | 1.120         | 1.044         | 1.061         | Q8TBB5       | KLHDC4    | Kelch domain-containing protein 4                |
| 0.988           | 0.995        | 0.992        | 1.060        | 0.941        | 1.081        | 1.010        | 1.131        | 0.997        | 0.970         | 1.010         | 0.982         | Q8IY47       | KBTBD2    | Kelch repeat and BTB domain-containing protein 2 |
| 1.065           | 1.015        | 1.004        | 0.996        | 0.892        | 1.003        | 0.985        | 1.027        | 0.973        | 0.941         | 0.970         | 0.967         | A0A075B6T4   | KBTBD4    | Kelch repeat and BTB domain-containing protein 4 |
| 1.032           | 1.000        | 0.968        | 0.999        | 0.939        | 0.990        | 1.009        | 1.121        | 1.056        | 1.035         | 1.022         | 0.934         | Q14145       | KEAP1     | Kelch-like ECH-associated protein 1              |
| 0.970           | 1.015        | 0.915        | 1.088        | 0.972        | 1.035        | 1.020        | 1.120        | 1.340        | 0.900         | 0.957         | 0.930         | Q9NVR0       | KLHL11    | Kelch-like protein 11                            |
| 1.094           | 1.032        | 1.190        | 0.962        | 0.897        | 0.888        | 0.886        | 0.933        | 0.800        |               |               |               | Q9P2G3       | KLHL14    | Kelch-like protein 14                            |
|                 |              |              |              |              |              |              |              |              | 0.950         | 0.986         | 0.960         | O94889       | KLHL18    | Kelch-like protein 18                            |
|                 |              |              |              |              |              |              |              |              | 0.925         | 1.171         | 1.039         | Q9Y2M5       | KLHL20    | Kelch-like protein 20                            |
|                 |              |              | 0.844        | 0.971        | 0.963        | 0.720        | 0.593        | 1.377        | 1.413         | 1.352         | 1.206         | Q96CT2       | KLHL29    | Kelch-like protein 29                            |
| 1.221           | 1.407        | 1.202        | 0.935        | 0.964        | 1.018        | 0.971        | 1.087        | 0.924        | 1.057         | 0.991         | 1.127         | Q8N4N3       | KLHL36    | Kelch-like protein 36                            |
|                 |              |              | 0.973        | 1.039        | 1.020        |              |              |              |               |               |               | Q9P2K6       | KLHL42    | Kelch-like protein 42                            |
| 1.095           | 1.019        | 1.254        | 1.292        | 1.449        | 1.117        | 0.826        | 1.030        | 1.195        | 0.990         | 0.996         | 1.160         | Q8IXQ5       | KLHL7     | Kelch-like protein 7                             |
|                 |              |              | 1.305        | 0.830        | 1.231        | 1.031        | 1.140        | 1.040        | 1.034         | 1.139         | 1.044         | A0A1B0GVI3   | KRT10     | Keratin, type I cytoskeletal 10 (Fragment)       |
| 1.249           | 0.706        | 1.061        | 1.099        | 1.023        | 0.481        | 0.690        | 0.647        | 0.492        | 0.656         | 1.335         | 0.812         | P02533       | KRT14     | Keratin, type I cytoskeletal 14                  |
|                 |              |              | 0.935        | 0.898        | 0.949        | 1.057        | 0.943        | 0.982        | 1.129         | 1.052         | 1.122         | P19012       | KRT15     | Keratin, type I cytoskeletal 15                  |
| 0.989           | 0.994        | 1.052        | 0.981        | 1.099        | 1.007        | 1.066        | 1.011        | 1.066        | 1.015         | 1.146         | 1.027         | Q04695       | KRT17     | Keratin, type I cytoskeletal 17                  |

| Abundance Ratio |              |              |              |              |              |              |              |              |               |               |               | Accession ID | Gene name | Protein Description                                                         |
|-----------------|--------------|--------------|--------------|--------------|--------------|--------------|--------------|--------------|---------------|---------------|---------------|--------------|-----------|-----------------------------------------------------------------------------|
| 1 d<br>M1/C1    | 1 d<br>M2/C2 | 1 d<br>M3/C3 | 4 d<br>M1/C1 | 4 d<br>M2/C2 | 4 d<br>M3/C3 | 7 d<br>M1/C1 | 7 d<br>M2/C2 | 7 d<br>M3/C3 | 10 d<br>M1/C1 | 10 d<br>M2/C2 | 10 d<br>M3/C3 |              |           |                                                                             |
| 0.973           | 0.997        | 1.000        | 0.987        | 0.962        | 0.982        | 0.967        | 0.980        | 0.993        | 0.969         | 1.005         | 0.979         | P05783       | KRT18     | Keratin, type I cytoskeletal 18                                             |
| 0.942           | 0.987        | 0.976        | 1.130        | 1.444        | 0.676        | 0.694        | 0.777        | 0.583        | 0.925         | 1.349         | 0.542         | P35527       | KRT9      | Keratin, type I cytoskeletal 9                                              |
| 0.962           | 1.013        | 0.983        | 1.088        | 1.216        | 0.711        | 0.730        | 0.803        | 0.580        | 0.868         | 1.310         | 0.603         | P04264       | KRT1      | Keratin, type II cytoskeletal 1                                             |
| 1.055           | 1.072        | 0.987        | 1.237        | 1.134        | 0.961        | 0.864        | 0.835        | 0.481        | 0.870         | 1.186         | 0.618         | P35908       | KRT2      | Keratin, type II cytoskeletal 2 epidermal                                   |
| 0.949           | 0.871        | 1.082        | 1.037        | 1.306        | 0.695        | 0.825        | 0.746        | 0.553        | 0.811         | 1.377         | 0.764         | P13647       | KRT5      | Keratin, type II cytoskeletal 5                                             |
| 1.626           | 0.766        | 1.172        | 0.874        | 1.244        | 0.509        | 0.852        | 0.499        | 0.440        | 0.620         | 1.296         | 0.873         | P04259       | KRT6B     | Keratin, type II cytoskeletal 6B                                            |
| 0.968           | 0.967        | 1.030        | 0.959        | 0.999        | 1.016        | 1.031        | 1.058        | 1.052        | 0.955         | 0.966         | 1.033         | Q6KB66       | KRT80     | Keratin, type II cytoskeletal 80                                            |
| 0.883           | 0.775        | 1.054        | 0.974        | 0.946        | 1.051        | 0.979        | 0.978        | 1.017        | 1.014         | 0.877         | 1.078         | Q8NC54       | KCT2      | Keratinocyte-associated transmembrane protein 2                             |
| 1.007           | 1.020        | 1.058        | 0.998        | 1.019        | 1.014        | 0.958        | 0.917        | 1.030        | 1.015         | 1.018         | 1.051         | Q9HA64       | FN3KRP    | Ketosamine-3-kinase                                                         |
| 1.009           | 0.989        | 1.000        | 0.985        | 0.962        | 0.979        | 0.957        | 0.943        | 0.970        | 1.019         | 1.045         | 0.976         | Q07666       | KHDRBS1   | KH domain-containing, RNA-binding, signal transduction-associated protein 1 |
| 1.079           | 1.056        | 1.060        | 0.987        | 0.936        | 1.033        | 1.028        | 1.017        | 0.974        | 0.976         | 1.009         | 1.092         | O75525       | KHDRBS3   | KH domain-containing, RNA-binding, signal transduction-associated protein 3 |
| 0.974           | 1.006        | 1.016        | 0.986        | 0.976        | 1.000        | 1.004        | 1.059        | 1.034        | 0.996         | 1.014         | 1.049         | J3KN16       | KIAA0368  | KIAA0368                                                                    |
|                 |              |              | 0.941        | 1.023        | 0.983        | 0.999        | 1.136        | 0.960        | 1.060         | 1.030         | 1.047         | Q5SVS4       | SLC25A30  | Kidney mitochondrial carrier protein 1                                      |
| 0.981           | 1.009        | 0.978        | 0.985        | 0.953        | 0.989        | 1.026        | 1.022        | 1.047        | 1.003         | 0.957         | 1.067         | A0A1B0GUA3   | KIF1BP    | KIF1-binding protein                                                        |
| 1.009           | 1.012        | 1.042        | 1.061        | 0.828        | 1.054        | 1.015        | 1.126        | 1.068        | 0.996         | 1.108         | 1.048         | Q9ULH0       | KIDINS220 | Kinase D-interacting substrate of 220 kDa                                   |
| 1.124           | 1.018        | 0.961        | 1.068        | 0.905        | 0.976        | 1.029        | 1.105        | 0.944        | 1.086         | 1.051         | 1.033         | Q8IVT5       | KSR1      | Kinase suppressor of Ras 1                                                  |
| 0.958           | 1.001        | 1.008        | 0.986        | 0.973        | 0.996        | 1.005        | 0.978        | 0.985        | 1.049         | 1.040         | 1.020         | Q86UP2       | KTN1      | Kinectin                                                                    |
| 1.068           | 1.054        | 0.986        | 1.008        | 0.870        | 1.018        | 1.003        | 1.219        | 1.405        |               |               |               | O60282       | KIF5C     | Kinesin heavy chain isoform 5C                                              |
| 1.028           | 0.971        | 1.022        | 1.003        | 0.986        | 1.021        | 1.018        | 1.022        | 0.989        | 1.103         | 0.993         | 1.043         | Q9H0B6       | KLC2      | Kinesin light chain 2                                                       |
| 0.989           | 0.988        | 1.010        | 0.996        | 1.010        | 1.021        | 0.990        | 0.992        | 1.026        | 1.000         | 1.018         | 1.037         | P33176       | KIF5B     | Kinesin-1 heavy chain                                                       |
| 0.996           | 1.010        | 1.030        | 1.005        | 0.973        | 1.007        | 1.018        | 1.060        | 0.964        | 1.006         | 1.000         | 0.986         | Q92845       | KIFAP3    | Kinesin-associated protein 3                                                |
| 0.947           | 0.978        | 1.015        | 1.018        | 1.022        | 1.010        | 1.105        | 1.209        | 1.127        | 0.949         | 0.901         | 1.080         | P52732       | KIF11     | Kinesin-like protein KIF11                                                  |
| 1.059           | 0.846        | 1.304        | 0.949        | 1.005        | 0.991        |              |              |              |               |               |               | Q96FN5       | KIF12     | Kinesin-like protein KIF12                                                  |
| 1.028           | 0.998        | 1.027        | 0.992        | 0.952        | 0.980        | 1.025        | 1.058        | 0.981        | 1.027         | 0.951         | 1.025         | Q9NQ78       | KIF13B    | Kinesin-like protein KIF13B                                                 |
| 1.003           | 1.045        | 1.124        | 1.036        | 0.921        | 1.099        | 0.992        | 1.117        | 1.007        | 0.931         | 0.948         | 1.098         | Q15058       | KIF14     | Kinesin-like protein KIF14                                                  |
| 0.947           | 1.001        | 1.028        | 0.917        | 0.974        | 1.028        | 0.572        | 0.633        | 0.740        | 0.942         | 0.978         | 0.939         | Q9NS87       | KIF15     | Kinesin-like protein KIF15                                                  |
| 0.955           | 0.987        | 1.121        | 0.989        | 0.949        | 1.034        | 1.017        | 1.004        | 1.005        | 1.010         | 0.980         | 1.044         | Q96L93       | KIF16B    | Kinesin-like protein KIF16B                                                 |
| 1.371           | 1.211        | 1.157        |              |              |              | 0.936        | 1.096        | 1.138        |               |               |               | Q8NI77       | KIF18A    | Kinesin-like protein KIF18A                                                 |
| 0.996           | 0.978        | 0.996        | 1.031        | 0.948        | 1.053        | 1.065        | 1.066        | 1.042        | 1.010         | 1.015         | 1.032         | O43896       | KIF1C     | Kinesin-like protein KIF1C                                                  |
| 1.007           | 1.035        | 1.020        |              |              |              |              |              |              | 1.070         | 0.753         | 1.223         | O95235       | KIF20A    | Kinesin-like protein KIF20A                                                 |
| 0.990           | 0.952        | 0.980        | 0.943        | 0.873        | 0.977        | 1.103        | 1.061        | 0.945        | 0.981         | 0.994         | 1.012         | HOYI78       | KIF21A    | Kinesin-like protein KIF21A (Fragment)                                      |
| 0.898           | 1.020        | 1.081        |              |              |              |              |              |              | 0.876         | 1.003         | 0.998         | Q14807       | KIF22     | Kinesin-like protein KIF22                                                  |

| Abundance Ratio |              |              |              |              |              |              |              |              |               |               |               | Accession ID | Gene name | Protein Description                                     |
|-----------------|--------------|--------------|--------------|--------------|--------------|--------------|--------------|--------------|---------------|---------------|---------------|--------------|-----------|---------------------------------------------------------|
| 1 d<br>M1/C1    | 1 d<br>M2/C2 | 1 d<br>M3/C3 | 4 d<br>M1/C1 | 4 d<br>M2/C2 | 4 d<br>M3/C3 | 7 d<br>M1/C1 | 7 d<br>M2/C2 | 7 d<br>M3/C3 | 10 d<br>M1/C1 | 10 d<br>M2/C2 | 10 d<br>M3/C3 |              |           |                                                         |
| 0.935           | 1.013        | 1.014        | 1.026        | 0.964        | 0.924        | 1.078        | 1.225        | 1.044        | 0.817         | 0.840         | 1.024         | Q99661       | KIF2C     | Kinesin-like protein KIF2C                              |
| 1.020           | 1.007        | 1.003        | 1.050        | 0.969        | 1.008        | 0.982        | 0.956        | 0.987        | 1.045         | 0.987         | 1.038         | O15066       | KIF3B     | Kinesin-like protein KIF3B                              |
| 0.901           | 0.972        | 1.043        | 0.969        | 0.944        | 1.043        | 0.971        | 0.880        | 0.976        | 1.107         | 1.143         | 1.256         | Q2M1P5       | KIF7      | Kinesin-like protein KIF7                               |
| 0.966           | 0.976        | 1.031        | 1.024        | 0.992        | 0.991        | 1.017        | 1.004        | 0.927        | 0.861         | 0.951         | 0.963         | Q9BW19       | KIFC1     | Kinesin-like protein KIFC1                              |
| 1.004           | 0.988        | 0.998        | 1.007        | 0.968        | 1.023        | 0.978        | 1.062        | 1.017        | 0.997         | 0.996         | 1.047         | E9PES4       | KIF3A     | Kinesin-like protein                                    |
| 0.973           | 1.023        | 0.982        | 1.032        | 0.994        | 1.077        | 1.020        | 0.966        | 0.961        | 1.009         | 0.984         | 0.993         | O14777       | NDC80     | Kinetochore protein NDC80 homolog                       |
| 0.951           | 0.991        | 1.034        | 1.036        | 0.900        | 0.940        |              |              |              | 0.950         | 0.912         | 1.207         | Q9BZD4       | NUF2      | Kinetochore protein Nuf2                                |
| 0.996           | 0.961        | 0.970        | 0.991        | 1.165        | 1.116        | 0.925        | 1.185        | 1.090        | 0.928         | 0.953         | 0.995         | K7EMX1       | SPC24     | Kinetochore protein Spc24 (Fragment)                    |
| 1.001           | 1.017        | 0.985        | 1.147        | 4.181        | 1.082        | 0.939        | 1.432        | 1.025        | 0.987         | 1.250         | 1.118         | Q9HBM1       | SPC25     | Kinetochore protein Spc25                               |
| 1.018           | 1.030        | 1.054        |              |              |              |              |              |              |               |               |               | Q8NG31       | KNL1      | Kinetochore scaffold 1                                  |
| 1.025           | 0.970        | 1.015        | 1.011        | 0.919        | 1.018        | 1.053        | 1.107        | 0.994        | 1.013         | 0.965         | 1.035         | P50748       | KNTC1     | Kinetochore-associated protein 1                        |
| 1.020           | 0.995        | 0.978        | 0.973        | 0.932        | 1.056        | 1.017        | 1.035        | 1.011        | 1.056         | 0.955         | 1.028         | Q9H410       | DSN1      | Kinetochore-associated protein DSN1 homolog             |
| 1.029           | 0.985        | 0.957        | 1.046        | 0.911        | 1.029        | 0.994        | 1.097        | 1.099        | 1.022         | 0.994         | 0.993         | Q96IY1       | NSL1      | Kinetochore-associated protein NSL1 homolog             |
| 0.895           | 0.970        | 1.074        | 0.972        | 0.865        | 1.065        | 0.989        | 1.039        | 0.966        | 1.098         | 0.995         | 1.219         | Q14678       | KANK1     | KN motif and ankyrin repeat domain-containing protein 1 |
| 0.821           | 0.902        | 0.959        | 0.896        | 0.740        | 0.936        |              |              |              |               |               |               | O00522       | KRIT1     | Krev interaction trapped protein 1                      |
| 0.989           | 1.001        | 0.970        | 0.984        | 0.952        | 1.026        | 1.006        | 0.998        | 1.042        | 0.972         | 1.018         | 0.972         | Q13601       | KRR1      | KRR1 small subunit processome component homolog         |
| 1.501           | 0.986        | 0.953        | 1.008        | 1.012        | 1.067        | 1.024        | 0.921        | 0.954        | 1.138         | 1.013         | 1.055         | Q9BXX1       | KLF16     | Krueppel-like factor 16                                 |
|                 |              |              | 0.956        | 0.865        | 0.924        | 0.729        | 0.491        | 0.880        | 0.997         | 1.119         | 1.010         | O43474       | KLF4      | Krueppel-like factor 4                                  |
|                 |              |              | 0.896        | 0.925        | 1.027        |              |              |              | 1.010         | 0.968         | 1.014         | Q99612       | KLF6      | Krueppel-like factor 6                                  |
| 0.928           | 0.974        | 1.019        | 1.125        | 0.995        | 1.223        | 1.101        | 1.019        | 1.049        | 1.095         | 1.037         | 1.073         | O43291       | SPINT2    | Kunitz-type protease inhibitor 2                        |
| 1.018           | 0.918        | 0.994        | 0.919        | 0.896        | 1.051        | 1.012        | 1.172        | 1.035        |               |               |               | Q6PIL6       | KCNIP4    | Kv channel-interacting protein 4                        |
| 0.871           | 1.196        | 1.046        | 1.004        | 0.936        | 1.025        | 1.145        | 1.033        | 1.047        |               |               |               | M0QY77       | KXD1      | KxDL motif-containing protein 1                         |
| 1.075           | 1.093        | 1.325        | 1.088        | 1.123        | 1.181        | 1.090        | 1.238        | 1.245        | 0.990         | 1.015         | 1.355         | Q16719       | KYNU      | Kynureninase                                            |
| 1.021           | 0.996        | 1.009        | 1.008        | 0.978        | 0.997        | 1.009        | 1.057        | 0.987        | 1.030         | 1.015         | 1.006         | Q6YP21       | KYAT3     | Kynurenine--oxoglutarate transaminase 3                 |
| 1.028           | 1.002        | 1.024        | 0.989        | 0.962        | 0.987        | 0.975        | 1.039        | 0.974        | 0.939         | 0.994         | 0.973         | Q9H9P8       | L2HGDH    | L-2-hydroxyglutarate dehydrogenase, mitochondrial       |
| 1.031           | 1.050        | 1.080        | 1.116        | 1.159        | 1.068        | 1.023        | 1.109        | 1.135        | 1.115         | 1.033         | 1.148         | Q08431       | MFGE8     | Lactadherin                                             |
| 1.052           | 0.887        | 1.025        | 0.942        | 1.029        | 1.079        | 1.057        | 1.152        | 1.019        | 1.004         | 0.949         | 1.092         | Q8WV93       | LACE1     | Lactation elevated protein 1                            |
| 1.125           | 0.864        | 1.117        | 0.892        | 0.714        | 1.063        |              |              |              |               |               |               | Q9NPC4       | A4GALT    | Lactosylceramide 4-alpha-galactosyltransferase          |
|                 |              |              |              |              |              | 0.874        | 0.543        | 0.544        |               |               |               | P02788       | LTF       | Lactotransferrin                                        |
| 1.027           | 1.010        | 0.960        | 1.009        | 1.072        | 0.997        | 1.013        | 1.055        | 1.017        | 0.984         | 1.013         | 0.974         | Q04760       | GLO1      | Lactoylglutathione lyase                                |
| 1.031           | 0.945        | 0.983        | 0.964        | 0.926        | 1.005        | 0.992        | 1.077        | 1.028        | 0.998         | 0.991         | 1.038         | Q9Y2S2       | CRYL1     | Lambda-crystallin homolog                               |
| 0.991           | 0.999        | 0.996        | 0.984        | 0.934        | 0.949        | 0.997        | 1.023        | 0.968        | 0.999         | 1.040         | 0.985         | P42166       | TMPO      | Lamina-associated polypeptide 2, isoform alpha          |

| Abundance Ratio |              |              |              |              |              |              |              |              |               |               |               | Accession ID | Gene name | Protein Description                                                       |
|-----------------|--------------|--------------|--------------|--------------|--------------|--------------|--------------|--------------|---------------|---------------|---------------|--------------|-----------|---------------------------------------------------------------------------|
| 1 d<br>M1/C1    | 1 d<br>M2/C2 | 1 d<br>M3/C3 | 4 d<br>M1/C1 | 4 d<br>M2/C2 | 4 d<br>M3/C3 | 7 d<br>M1/C1 | 7 d<br>M2/C2 | 7 d<br>M3/C3 | 10 d<br>M1/C1 | 10 d<br>M2/C2 | 10 d<br>M3/C3 |              |           |                                                                           |
| 0.841           | 1.111        | 1.110        | 0.916        | 0.996        | 1.037        | 0.894        | 0.920        | 0.946        | 1.068         | 1.371         | 1.286         | H0YJH7       | TMPO      | Lamina-associated polypeptide 2, isoforms beta/gamma (Fragment)           |
| 0.961           | 0.996        | 1.000        | 0.971        | 0.946        | 0.992        | 1.008        | 1.034        | 0.995        | 1.017         | 1.037         | 0.986         | P42167       | TMPO      | Lamina-associated polypeptide 2, isoforms beta/gamma                      |
| 0.946           | 0.989        | 0.994        | 0.992        | 0.955        | 0.999        | 0.995        | 1.022        | 0.969        | 1.097         | 1.072         | 1.024         | Q14739       | LBR       | Lamin-B receptor                                                          |
| 0.992           | 0.991        | 0.995        | 0.980        | 0.979        | 1.001        | 0.972        | 0.978        | 0.971        | 0.977         | 0.991         | 0.975         | P20700       | LMNB1     | Lamin-B1                                                                  |
| 1.002           | 0.995        | 1.001        | 0.995        | 0.970        | 0.993        | 0.988        | 0.962        | 0.987        | 0.991         | 0.998         | 0.989         | Q03252       | LMNB2     | Lamin-B2                                                                  |
| 1.072           | 1.045        | 1.030        |              |              |              | 1.058        | 1.169        | 1.083        | 0.900         | 1.004         | 1.060         | P25391       | LAMA1     | Laminin subunit alpha-1                                                   |
| 1.032           | 1.041        | 1.037        | 1.046        | 1.070        | 1.079        | 1.079        | 1.043        | 1.049        | 1.044         | 1.051         | 1.035         | O15230       | LAMA5     | Laminin subunit alpha-5                                                   |
|                 |              |              |              |              |              |              |              |              | 1.207         | 1.096         | 1.125         | E7EPA6       | LAMB1     | Laminin subunit beta-1                                                    |
| 1.009           | 1.010        | 1.040        | 1.046        | 1.045        | 1.057        | 1.078        | 1.051        | 1.056        | 1.070         | 1.059         | 1.065         | G3XAI2       | LAMB1     | Laminin subunit beta-1                                                    |
| 1.004           | 1.002        | 1.038        | 1.023        | 0.985        | 1.042        | 0.953        | 1.071        | 0.992        | 1.102         | 0.999         | 1.091         | P55268       | LAMB2     | Laminin subunit beta-2                                                    |
|                 |              |              | 1.128        | 0.833        | 1.033        | 1.032        | 0.981        | 0.992        | 0.986         | 0.886         | 1.122         | Q13751       | LAMB3     | Laminin subunit beta-3                                                    |
| 0.995           | 1.013        | 1.062        | 1.037        | 1.052        | 1.075        | 1.091        | 1.027        | 1.064        | 1.123         | 1.058         | 1.153         | P11047       | LAMC1     | Laminin subunit gamma-1                                                   |
| 1.272           | 1.118        | 1.101        | 1.037        | 0.924        | 0.938        | 1.090        | 0.860        | 0.920        | 0.943         | 0.785         | 1.087         | Q13753       | LAMC2     | Laminin subunit gamma-2                                                   |
| 1.015           | 0.989        | 1.007        | 1.007        | 1.019        | 1.018        | 0.995        | 1.041        | 1.031        | 0.985         | 0.971         | 0.990         | Q9NRN7       | AASDHPPT  | L-aminoadipate-semialdehyde dehydrogenase-phosphopantetheinyl transferase |
| 1.029           | 0.978        | 0.974        | 1.028        | 1.094        | 0.989        | 1.015        | 0.986        | 1.012        | 1.012         | 0.997         | 0.942         | O43813       | LANCL1    | LanC-like protein 1                                                       |
| 0.967           | 0.985        | 0.985        | 0.991        | 0.951        | 1.082        | 1.042        | 1.062        | 1.004        | 1.043         | 1.007         | 1.077         | Q9NS86       | LANCL2    | LanC-like protein 2                                                       |
| 1.004           | 1.041        | 1.071        | 1.093        | 1.020        | 1.090        | 1.101        | 1.123        | 1.056        | 1.073         | 1.019         | 1.069         | A0A0C4DFL7   | CYP51A1   | Lanosterol 14-alpha demethylase                                           |
| 0.981           | 1.011        | 1.021        | 1.019        | 0.984        | 1.002        | 1.045        | 1.062        | 0.988        | 1.092         | 1.025         | 1.033         | P48449       | LSS       | Lanosterol synthase                                                       |
| 1.025           | 1.015        | 1.013        | 1.026        | 0.997        | 1.019        | 1.008        | 1.053        | 1.005        | 1.015         | 1.039         | 0.999         | Q6PKG0       | LARP1     | La-related protein 1                                                      |
| 0.977           | 0.969        | 1.066        | 1.076        | 0.850        | 1.066        | 1.038        | 0.961        | 1.018        | 1.102         | 0.989         | 1.084         | Q659C4       | LARP1B    | La-related protein 1B                                                     |
| 1.035           | 0.963        | 1.020        | 0.957        | 1.002        | 1.054        | 1.005        | 1.073        | 1.034        | 1.019         | 1.018         | 1.058         | Q92615       | LARP4B    | La-related protein 4B                                                     |
| 1.035           | 1.065        | 1.034        | 1.058        | 0.945        | 1.014        | 0.957        | 1.101        | 1.034        | 0.844         | 0.855         | 0.964         | Q9BRS8       | LARP6     | La-related protein 6                                                      |
| 0.929           | 0.964        | 0.950        | 1.017        | 0.901        | 1.087        | 1.112        | 1.065        | 1.038        | 1.127         | 1.119         | 1.092         | Q01650       | SLC7A5    | Large neutral amino acids transporter small subunit 1                     |
| 0.967           | 0.981        | 0.996        | 0.964        | 0.989        | 1.049        | 1.006        | 0.994        | 1.018        | 0.973         | 1.016         | 1.042         | Q9H089       | LSG1      | Large subunit GTPase 1 homolog                                            |
| 1.021           | 1.019        | 0.974        | 1.038        | 0.995        | 1.049        | 1.031        | 1.089        | 0.999        | 1.020         | 0.992         | 1.015         | Q9UK59       | DBR1      | Lariat debranching enzyme                                                 |
| 1.073           | 1.024        | 1.050        | 1.001        | 0.974        | 1.017        | 0.960        | 1.079        | 1.032        | 1.038         | 0.975         | 0.997         | Q8NBF6       | AVL9      | Late secretory pathway protein AVL9 homolog                               |
| 1.032           | 1.044        | 1.010        | 0.973        | 0.929        | 0.961        | 0.980        | 1.017        | 0.986        | 1.114         | 0.986         | 1.047         | Q8N2S1       | LTBP4     | Latent-transforming growth factor beta-binding protein 4                  |
| 0.963           | 1.038        | 1.036        | 1.017        | 0.950        | 1.001        | 1.027        | 1.113        | 0.953        | 1.024         | 1.081         | 1.083         | O75845       | SC5D      | Lathosterol oxidase                                                       |
| 0.994           | 0.985        | 0.980        | 1.019        | 0.991        | 1.018        | 1.018        | 0.985        | 0.987        | 1.046         | 1.020         | 1.005         | Q14696       | MESDC2    | LDLR chaperone MESD                                                       |
| 0.929           | 0.973        | 0.959        | 1.114        | 1.077        | 1.114        | 1.301        | 1.282        | 1.319        | 1.521         | 1.505         | 1.472         | Q99538       | LGMN      | Legumain                                                                  |
| 0.982           | 0.995        | 1.041        | 0.963        | 0.939        | 1.042        | 0.954        | 0.885        | 0.975        | 1.026         | 1.009         | 1.043         | Q8NC56       | LEMD2     | LEM domain-containing protein 2                                           |

| Abundance Ratio |              |              |              |              |              |              |              |              |               |               |               | Accession ID | Gene name | Protein Description                                                   |
|-----------------|--------------|--------------|--------------|--------------|--------------|--------------|--------------|--------------|---------------|---------------|---------------|--------------|-----------|-----------------------------------------------------------------------|
| 1 d<br>M1/C1    | 1 d<br>M2/C2 | 1 d<br>M3/C3 | 4 d<br>M1/C1 | 4 d<br>M2/C2 | 4 d<br>M3/C3 | 7 d<br>M1/C1 | 7 d<br>M2/C2 | 7 d<br>M3/C3 | 10 d<br>M1/C1 | 10 d<br>M2/C2 | 10 d<br>M3/C3 |              |           |                                                                       |
| 1.011           | 0.987        | 1.015        | 1.031        | 1.032        | 0.989        | 1.004        | 1.037        | 1.012        | 1.026         | 1.026         | 1.019         | Q15334       | LLGL1     | Lethal(2) giant larvae protein homolog 1                              |
| 0.985           | 1.014        | 1.042        | 1.005        | 1.000        | 0.974        | 1.024        | 1.057        | 1.011        | 1.080         | 1.020         | 1.089         | Q6P1M3       | LLGL2     | Lethal(2) giant larvae protein homolog 2                              |
| 0.943           | 0.975        | 0.982        | 1.091        | 0.989        | 1.098        | 1.000        | 1.057        | 0.984        | 0.934         | 0.958         | 1.074         | Q969R5       | L3MBTL2   | Lethal(3)malignant brain tumor-like protein 2                         |
| 1.041           | 0.979        | 1.061        | 1.077        | 0.924        | 1.016        | 1.002        | 1.057        | 1.076        | 1.024         | 1.160         | 1.047         | Q96JM7       | L3MBTL3   | Lethal(3)malignant brain tumor-like protein 3                         |
| 0.983           | 0.981        | 1.016        | 0.977        | 0.901        | 0.987        | 1.018        | 1.000        | 1.008        | 0.997         | 1.003         | 0.991         | O95202       | LETM1     | LETM1 and EF-hand domain-containing protein 1, mitochondrial          |
| 1.014           | 1.012        | 1.036        | 0.970        | 1.001        | 1.033        | 1.007        | 0.976        | 1.000        | 1.065         | 0.976         | 1.081         | Q86V48       | LUZP1     | Leucine zipper protein 1                                              |
| 0.898           | 0.979        | 1.334        | 0.900        | 0.663        | 1.390        | 0.818        | 0.769        | 0.973        |               |               |               | Q9BRK4       | LZTS2     | Leucine zipper putative tumor suppressor 2                            |
| 1.113           | 0.903        | 1.071        | 1.100        | 0.952        | 1.176        | 1.056        | 1.166        | 1.012        |               |               |               | O60299       | LZTS3     | Leucine zipper putative tumor suppressor 3                            |
| 1.034           | 0.979        | 1.016        | 0.995        | 1.000        | 0.999        | 0.999        | 0.975        | 1.020        | 0.994         | 1.015         | 0.996         | Q9NQ48       | LZTFL1    | Leucine zipper transcription factor-like protein 1                    |
| 0.981           | 1.001        | 1.004        | 1.014        | 1.022        | 1.001        | 1.016        | 0.992        | 1.029        | 1.017         | 0.995         | 0.985         | P42704       | LRPPRC    | Leucine-rich PPR motif-containing protein, mitochondrial              |
| 0.982           | 0.973        | 1.003        | 0.999        | 0.938        | 1.013        | 0.986        | 0.962        | 1.020        | 0.980         | 0.970         | 1.039         | Q96I18       | LRCH3     | Leucine-rich repeat and calponin homology domain-containing protein 3 |
|                 |              |              |              |              |              |              |              |              | 0.989         | 0.999         | 0.885         | O75427       | LRCH4     | Leucine-rich repeat and calponin homology domain-containing protein 4 |
| 1.034           | 1.013        | 1.032        | 0.970        | 0.927        | 1.015        | 0.951        | 1.065        | 0.981        | 0.914         | 0.962         | 0.967         | Q9UFC0       | LRWD1     | Leucine-rich repeat and WD repeat-containing protein 1                |
| 0.972           | 0.962        | 1.046        | 1.033        | 0.972        | 1.056        | 1.038        | 1.061        | 1.120        | 1.028         | 1.075         | 1.073         | Q8WUT4       | LRRN4     | Leucine-rich repeat neuronal protein 4                                |
| 1.018           | 1.019        | 1.024        | 0.998        | 0.951        | 1.031        | 1.004        | 1.078        | 1.004        | 1.010         | 0.994         | 1.058         | Q9UQ13       | SHOC2     | Leucine-rich repeat protein SHOC-2                                    |
| 0.955           | 1.016        | 1.071        | 1.068        | 1.119        | 1.079        | 1.145        | 1.176        | 0.928        | 0.941         | 1.046         | 1.242         | Q9BXB1       | LGR4      | Leucine-rich repeat-containing G-protein coupled receptor 4           |
|                 |              |              | 0.935        | 0.758        | 1.141        | 1.028        | 2.030        | 1.008        | 1.196         | 0.949         | 1.346         | O75473       | LGR5      | Leucine-rich repeat-containing G-protein coupled receptor 5           |
| 1.025           | 0.981        | 1.195        | 0.948        | 1.015        | 1.052        | 0.999        | 1.039        | 0.994        | 0.964         | 0.967         | 1.084         | Q9BTT6       | LRRC1     | Leucine-rich repeat-containing protein 1                              |
| 0.979           | 1.069        | 1.013        | 0.971        | 0.931        | 1.028        | 1.065        | 1.043        | 1.010        | 1.006         | 1.031         | 0.969         | Q15048       | LRRC14    | Leucine-rich repeat-containing protein 14                             |
| 1.108           | 1.038        | 0.962        | 0.997        | 0.916        | 0.896        | 1.021        | 1.182        | 1.027        | 0.985         | 0.974         | 0.996         | Q8TCA0       | LRRC20    | Leucine-rich repeat-containing protein 20                             |
| 1.056           | 1.078        | 0.995        | 0.917        | 0.951        | 1.015        | 0.967        | 1.125        | 1.067        | 1.025         | 0.961         | 1.005         | Q6UY01       | LRRC31    | Leucine-rich repeat-containing protein 31                             |
| 1.048           | 0.985        | 1.019        | 1.004        | 0.926        | 1.001        | 1.006        | 1.063        | 1.023        | 1.010         | 0.946         | 1.019         | Q9H9A6       | LRRC40    | Leucine-rich repeat-containing protein 40                             |
| 1.009           | 1.061        | 1.053        | 0.961        | 0.978        | 1.130        | 1.032        | 1.055        | 1.081        | 1.304         | 1.104         | 1.107         | Q15345       | LRRC41    | Leucine-rich repeat-containing protein 41                             |
| 0.947           | 1.059        | 0.986        | 0.942        | 0.915        | 1.047        | 0.821        | 1.137        | 1.104        | 0.843         | 0.879         | 0.962         | Q9Y546       | LRRC42    | Leucine-rich repeat-containing protein 42                             |
| 1.005           | 0.998        | 1.007        | 1.012        | 1.004        | 1.012        | 1.042        | 0.994        | 1.003        | 1.015         | 0.986         | 1.030         | Q8N1G4       | LRRC47    | Leucine-rich repeat-containing protein 47                             |
| 1.000           | 0.961        | 0.981        | 0.991        | 0.936        | 1.058        | 0.998        | 1.020        | 0.969        | 0.987         | 1.020         | 0.995         | Q8N9N7       | LRRC57    | Leucine-rich repeat-containing protein 57                             |
|                 |              |              | 1.142        | 0.917        | 0.936        | 1.117        | 0.963        | 0.985        | 1.020         | 0.968         | 0.935         | Q96CX6       | LRRC58    | Leucine-rich repeat-containing protein 58                             |
| 1.002           | 0.995        | 1.020        | 0.998        | 1.047        | 0.999        | 1.007        | 0.985        | 1.034        | 0.978         | 1.034         | 1.010         | Q96AG4       | LRRC59    | Leucine-rich repeat-containing protein 59                             |
| 1.260           | 0.795        | 0.903        |              |              |              |              |              |              |               |               |               | Q96NW7       | LRRC7     | Leucine-rich repeat-containing protein 7                              |



| Abundance Ratio |              |              |              |              |              |              |              |              |               |               |               | Accession ID | Gene name | Protein Description                                                                                        |
|-----------------|--------------|--------------|--------------|--------------|--------------|--------------|--------------|--------------|---------------|---------------|---------------|--------------|-----------|------------------------------------------------------------------------------------------------------------|
| 1 d<br>M1/C1    | 1 d<br>M2/C2 | 1 d<br>M3/C3 | 4 d<br>M1/C1 | 4 d<br>M2/C2 | 4 d<br>M3/C3 | 7 d<br>M1/C1 | 7 d<br>M2/C2 | 7 d<br>M3/C3 | 10 d<br>M1/C1 | 10 d<br>M2/C2 | 10 d<br>M3/C3 |              |           |                                                                                                            |
|                 |              |              | 0.912        | 0.911        | 0.934        |              |              |              |               |               |               | Q8N4P6       | LRRC71    | Leucine-rich repeat-containing protein 71                                                                  |
| 0.961           | 0.991        | 0.990        | 0.986        | 1.012        | 0.994        | 0.979        | 0.972        | 0.992        | 0.968         | 0.981         | 0.997         | Q9P2J5       | LARS      | Leucine--tRNA ligase, cytoplasmic                                                                          |
| 1.078           | 1.060        | 1.077        | 0.924        | 0.952        | 1.020        | 1.044        | 1.070        | 1.118        | 1.017         | 1.027         | 1.045         | Q8N653       | LZTR1     | Leucine-zipper-like transcriptional regulator 1                                                            |
| 1.028           | 1.024        | 1.017        | 1.049        | 1.000        | 1.057        | 1.079        | 1.126        | 1.078        | 1.077         | 1.048         | 1.054         | Q9UIQ6       | LNPEP     | Leucyl-cystinyl aminopeptidase                                                                             |
|                 |              |              |              |              |              | 1.262        | 0.859        | 1.169        | 0.938         | 0.882         | 1.187         | P15018       | LIF       | Leukemia inhibitory factor                                                                                 |
| 0.999           | 1.001        | 0.976        | 0.989        | 0.989        | 0.990        | 0.999        | 1.037        | 0.978        | 1.009         | 0.970         | 0.998         | P30740       | SERPINB1  | Leukocyte elastase inhibitor                                                                               |
| 1.088           | 1.019        | 1.097        |              |              |              | 1.032        | 1.004        | 0.891        | 1.036         | 1.049         | 1.049         | Q96BZ8       | LENG1     | Leukocyte receptor cluster member 1                                                                        |
| 1.011           | 0.996        | 1.074        | 1.131        | 0.947        | 0.978        | 1.168        | 1.090        | 1.126        | 1.171         | 1.032         | 1.071         | Q08722       | CD47      | Leukocyte surface antigen CD47                                                                             |
| 1.011           | 0.996        | 0.999        | 0.993        | 1.019        | 0.974        | 0.973        | 0.986        | 0.994        | 1.004         | 1.004         | 0.973         | P09960       | LTA4H     | Leukotriene A-4 hydrolase                                                                                  |
| 0.845           | 0.894        | 0.945        | 1.036        | 0.992        | 0.978        | 0.953        | 0.909        | 0.907        | 1.006         | 1.020         | 0.947         | Q9UNZ5       | C19orf53  | Leydig cell tumor 10 kDa protein homolog                                                                   |
| 1.078           | 1.066        | 1.071        | 1.022        | 1.149        | 1.061        | 0.996        | 0.917        | 0.993        | 1.110         | 1.101         | 1.179         | Q5T3J3       | LRIF1     | Ligand-dependent nuclear receptor-interacting factor 1                                                     |
| 1.040           | 0.942        | 1.026        | 0.971        | 0.967        | 0.960        | 1.039        | 0.917        | 1.011        | 0.917         | 1.000         | 1.003         | Q9NZU5       | LMCD1     | LIM and cysteine-rich domains protein 1                                                                    |
| 1.048           | 1.002        | 1.009        | 0.987        | 1.073        | 0.974        | 0.992        | 0.869        | 0.985        | 0.998         | 0.988         | 0.995         | Q14847       | LASP1     | LIM and SH3 domain protein 1                                                                               |
| 1.011           | 0.980        | 1.002        | 0.988        | 1.027        | 1.017        | 1.001        | 0.952        | 0.998        | 1.012         | 1.002         | 1.012         | Q9UHB6       | LIMA1     | LIM domain and actin-binding protein 1                                                                     |
| 1.006           | 1.130        | 0.765        | 1.057        | 0.990        | 1.069        | 1.063        | 1.220        | 1.165        | 0.948         | 0.838         | 1.026         | E9PC47       | LIMK1     | LIM domain kinase 1                                                                                        |
| 0.997           | 0.991        | 1.008        | 0.964        | 0.964        | 1.026        | 1.056        | 0.942        | 0.999        | 1.003         | 0.945         | 1.065         | F8WD26       | LMO7      | LIM domain only protein 7                                                                                  |
| 1.050           | 1.004        | 1.043        | 1.003        | 1.001        | 1.001        | 1.029        | 1.009        | 1.006        | 0.949         | 1.011         | 1.039         | Q9UGP4       | LIMD1     | LIM domain-containing protein 1                                                                            |
| 1.239           | 1.254        | 0.702        | 1.009        | 1.053        | 1.058        | 1.060        | 0.969        | 1.062        | 0.967         | 0.841         | 1.099         | Q9BT23       | LIMD2     | LIM domain-containing protein 2                                                                            |
|                 |              |              | 0.912        | 0.927        | 1.152        | 0.987        | 0.887        | 0.987        | 1.009         | 0.994         | 1.088         | Q96IF1       | AJUBA     | LIM domain-containing protein ajuba                                                                        |
| 1.031           | 0.973        | 0.989        | 1.046        | 1.098        | 0.946        | 1.111        | 1.120        | 0.983        |               |               |               | Q9UN81       | L1RE1     | LINE-1 retrotransposable element ORF1 protein                                                              |
| 0.978           | 1.007        | 1.035        | 0.903        | 0.857        | 1.213        | 1.061        | 1.190        | 0.941        | 0.996         | 1.020         | 1.367         | Q9GZY6       | LAT2      | Linker for activation of T-cells family member 2                                                           |
| 0.716           | 0.881        | 1.125        | 1.076        | 0.931        | 1.071        | 0.958        | 0.828        | 0.916        | 0.681         | 1.189         | 1.022         | Q96S06       | LMF1      | Lipase maturation factor 1                                                                                 |
| 0.963           | 0.990        | 0.973        | 0.966        | 0.911        | 1.036        | 1.099        | 1.085        | 1.074        | 1.091         | 1.008         | 1.088         | Q9BU23       | LMF2      | Lipase maturation factor 2                                                                                 |
| 1.003           | 1.018        | 1.027        | 1.009        | 0.974        | 1.030        | 1.029        | 1.068        | 0.991        | 1.012         | 0.998         | 1.092         | B5MDU6       | LDAH      | Lipid droplet-associated hydrolase                                                                         |
| 1.026           | 1.005        | 0.998        | 1.019        | 0.986        | 1.009        | 1.005        | 1.035        | 1.006        | 1.014         | 0.998         | 0.978         | P11182       | DBT       | Lipoamide acyltransferase component of branched-chain alpha-keto acid dehydrogenase complex, mitochondrial |
| 1.021           | 1.056        | 1.014        | 1.087        | 0.972        | 1.107        | 1.141        | 1.000        | 1.055        | 1.172         | 1.052         | 1.120         | Q86X29       | LSR       | Lipolysis-stimulated lipoprotein receptor                                                                  |
| 1.061           | 0.984        | 0.991        | 0.968        | 0.970        | 0.991        | 0.967        | 1.059        | 0.930        | 0.944         | 0.942         | 0.913         | C9J2R5       | LPP       | Lipoma-preferred partner (Fragment)                                                                        |
| 1.023           | 1.032        | 1.014        | 0.993        | 1.179        | 0.976        | 1.047        | 0.862        | 1.001        | 1.019         | 1.042         | 1.034         | Q93052       | LPP       | Lipoma-preferred partner                                                                                   |
| 1.093           | 0.903        | 1.117        | 0.967        | 0.827        | 0.696        | 0.654        | 0.889        | 0.814        | 0.466         | 1.105         | 0.564         | P18428       | LBP       | Lipopolysaccharide-binding protein                                                                         |
| 0.903           | 1.056        | 1.010        | 0.994        | 0.912        | 1.093        | 1.136        | 1.033        | 1.058        | 1.046         | 0.954         | 0.995         | Q99732       | LITAF     | Lipopolysaccharide-induced tumor necrosis factor-alpha factor                                              |
| 0.998           | 1.103        | 0.962        |              |              |              | 1.003        | 1.091        | 0.991        |               |               |               | F5GZB4       | LOXHD1    | Lipoxygenase homology domain-containing protein 1                                                          |

| Abundance Ratio |              |              |              |              |              |              |              |              |               |               |               | Accession ID | Gene name | Protein Description                                                |
|-----------------|--------------|--------------|--------------|--------------|--------------|--------------|--------------|--------------|---------------|---------------|---------------|--------------|-----------|--------------------------------------------------------------------|
| 1 d<br>M1/C1    | 1 d<br>M2/C2 | 1 d<br>M3/C3 | 4 d<br>M1/C1 | 4 d<br>M2/C2 | 4 d<br>M3/C3 | 7 d<br>M1/C1 | 7 d<br>M2/C2 | 7 d<br>M3/C3 | 10 d<br>M1/C1 | 10 d<br>M2/C2 | 10 d<br>M3/C3 |              |           |                                                                    |
| 1.251           | 0.889        | 1.122        | 1.021        | 0.893        | 1.081        | 0.974        | 1.115        | 1.186        | 1.051         | 1.008         | 1.011         | O43766       | LIAS      | Lipoyl synthase, mitochondrial                                     |
| 1.095           | 0.956        | 0.960        | 0.923        | 0.808        | 0.995        |              |              |              | 1.281         | 0.956         | 0.744         | Q9Y234       | LIPT1     | Lipoyltransferase 1, mitochondrial                                 |
| 0.986           | 0.969        | 1.016        | 0.968        | 0.989        | 1.034        | 1.013        | 0.955        | 1.002        | 1.022         | 1.006         | 1.058         | Q13136       | PPFIA1    | Liprin-alpha-1                                                     |
| 1.099           | 1.187        | 1.123        | 1.135        | 0.752        | 1.161        |              |              |              |               |               |               | O75145       | PPFIA3    | Liprin-alpha-3                                                     |
|                 |              |              |              |              |              |              |              |              | 0.915         | 1.066         | 0.968         | B1APN9       | PPFIA4    | Liprin-alpha-4                                                     |
| 0.972           | 0.967        | 1.037        | 0.963        | 0.919        | 0.966        | 0.981        | 0.931        | 0.984        | 1.005         | 0.977         | 1.051         | Q86W92       | PPFIBP1   | Liprin-beta-1                                                      |
|                 |              |              |              |              |              | 0.866        | 0.958        | 0.831        | 0.832         | 0.904         | 1.116         | Q8ND30       | PPFIBP2   | Liprin-beta-2                                                      |
|                 |              |              |              |              |              |              |              |              | 0.976         | 0.977         | 1.002         | A0A075B768   | KIAA1468  | LisH domain and HEAT repeat-containing protein KIAA1468 (Fragment) |
| 0.991           | 0.949        | 0.992        | 0.947        | 1.099        | 1.030        | 1.112        | 1.030        | 1.037        | 1.012         | 0.988         | 1.107         | A0A087X1I8   | ARMC9     | LisH domain-containing protein ARMC9                               |
| 1.002           | 0.981        | 0.954        | 1.010        | 0.933        | 0.946        | 0.889        | 0.833        | 1.004        | 0.974         | 1.007         | 1.049         | Q9Y2F5       | ICE1      | Little elongation complex subunit 1                                |
| 1.060           | 1.033        | 0.989        | 1.034        | 1.036        | 0.911        | 0.858        | 1.329        | 1.157        | 0.891         | 0.945         | 1.089         | Q659A1       | ICE2      | Little elongation complex subunit 2                                |
| 1.016           | 1.052        | 1.208        | 0.876        | 0.956        | 1.037        | 0.945        | 0.910        | 1.020        | 0.936         | 0.911         | 1.216         | Q8IVB5       | LIX1L     | LIX1-like protein                                                  |
| 0.982           | 0.993        | 0.981        | 1.011        | 0.989        | 1.007        | 1.011        | 1.049        | 0.996        | 1.007         | 1.009         | 0.982         | P07195       | LDHB      | L-lactate dehydrogenase B chain                                    |
|                 |              |              | 0.887        | 1.257        | 0.730        |              |              |              |               |               |               | P07864       | LDHC      | L-lactate dehydrogenase C chain                                    |
| 1.155           | 1.076        | 0.993        | 1.101        | 1.053        | 1.020        | 1.070        | 0.951        | 1.078        | 1.141         | 1.060         | 1.017         | Q68DH5       | LMBRD2    | LMBR1 domain-containing protein 2                                  |
| 1.075           | 1.063        | 0.988        | 1.008        | 0.962        | 1.019        | 0.987        | 1.044        | 1.057        | 0.941         | 0.984         | 1.072         | Q86WA8       | LONP2     | Lon protease homolog 2, peroxisomal                                |
| 0.985           | 1.013        | 1.003        | 0.998        | 0.993        | 1.020        | 1.008        | 1.042        | 0.997        | 0.987         | 0.980         | 1.021         | P36776       | LONP1     | Lon protease homolog, mitochondrial                                |
| 1.019           | 0.986        | 0.978        | 0.999        | 1.015        | 0.995        | 1.019        | 1.074        | 1.018        | 1.033         | 1.005         | 0.971         | Q6PCB7       | SLC27A1   | Long-chain fatty acid transport protein 1                          |
| 0.975           | 0.991        | 1.019        | 0.996        | 0.927        | 1.002        | 1.019        | 1.041        | 1.012        | 1.035         | 1.056         | 1.020         | Q6P1M0       | SLC27A4   | Long-chain fatty acid transport protein 4                          |
| 1.029           | 1.012        | 1.008        | 1.038        | 1.036        | 1.029        | 1.021        | 1.041        | 1.056        | 1.041         | 1.017         | 1.065         | P33121       | ACSL1     | Long-chain-fatty-acid--CoA ligase 1                                |
| 0.974           | 1.025        | 0.979        | 0.988        | 0.958        | 1.006        | 1.004        | 1.015        | 1.007        | 0.977         | 1.041         | 1.029         | O95573       | ACSL3     | Long-chain-fatty-acid--CoA ligase 3                                |
| 1.054           | 1.044        | 1.022        | 1.069        | 1.087        | 1.008        | 1.056        | 1.040        | 1.022        | 1.014         | 1.036         | 1.028         | O60488       | ACSL4     | Long-chain-fatty-acid--CoA ligase 4                                |
| 0.988           | 0.992        | 1.025        | 0.981        | 0.996        | 1.072        | 0.944        | 0.890        | 0.959        | 1.008         | 0.944         | 1.067         | Q5SW96       | LDLRAP1   | Low density lipoprotein receptor adapter protein 1                 |
| 1.045           | 0.992        | 1.000        | 1.018        | 0.938        | 0.994        | 0.968        | 1.055        | 0.984        | 0.956         | 1.001         | 0.977         | P24666       | ACP1      | Low molecular weight phosphotyrosine protein phosphatase           |
| 0.958           | 1.077        | 1.000        | 1.068        | 0.967        | 1.084        | 1.041        | 1.211        | 1.102        | 1.063         | 1.110         | 1.129         | J3KMZ9       | LDLR      | Low-density lipoprotein receptor (Fragment)                        |
| 1.009           | 1.134        | 1.124        | 1.034        | 0.882        | 1.294        | 1.147        | 1.197        | 1.510        | 1.177         | 0.967         | 1.134         | Q7Z4F1       | LRP10     | Low-density lipoprotein receptor-related protein 10                |
|                 |              |              |              |              |              | 1.236        | 1.333        | 1.141        | 1.338         | 1.134         | 1.254         | Q14114       | LRP8      | Low-density lipoprotein receptor-related protein 8                 |
| 1.015           | 0.997        | 1.001        | 0.980        | 0.975        | 1.028        | 0.974        | 1.026        | 1.022        | 0.993         | 1.024         | 0.981         | P05455       | SSB       | Lupus La protein                                                   |
| 1.007           | 1.044        | 1.016        | 0.994        | 1.008        | 1.026        | 1.030        | 1.068        | 1.009        | 1.004         | 0.976         | 1.051         | Q7Z4W1       | DCXR      | L-xylulose reductase                                               |
| 0.886           | 0.924        | 1.222        |              |              |              | 1.253        | 1.064        | 1.116        | 1.057         | 1.147         | 1.114         | Q17RY6       | LY6K      | Lymphocyte antigen 6K                                              |
| 0.981           | 0.870        | 1.088        | 0.980        | 0.908        | 0.929        | 1.065        | 1.139        | 0.948        | 1.167         | 1.158         | 1.107         | P19256       | CD58      | Lymphocyte function-associated antigen 3                           |

| Abundance Ratio |              |              |              |              |              |              |              |              |               |               |               | Accession ID | Gene name | Protein Description                                                 |
|-----------------|--------------|--------------|--------------|--------------|--------------|--------------|--------------|--------------|---------------|---------------|---------------|--------------|-----------|---------------------------------------------------------------------|
| 1 d<br>M1/C1    | 1 d<br>M2/C2 | 1 d<br>M3/C3 | 4 d<br>M1/C1 | 4 d<br>M2/C2 | 4 d<br>M3/C3 | 7 d<br>M1/C1 | 7 d<br>M2/C2 | 7 d<br>M3/C3 | 10 d<br>M1/C1 | 10 d<br>M2/C2 | 10 d<br>M3/C3 |              |           |                                                                     |
| 0.804           | 0.993        | 1.075        | 0.992        | 0.928        | 1.020        | 1.138        | 0.990        | 1.019        | 1.139         | 0.957         | 1.153         | Q43325       | LYRM1     | LYR motif-containing protein 1                                      |
| 0.931           | 1.010        | 0.960        | 1.027        | 1.034        | 0.965        | 1.013        | 0.961        | 0.876        | 1.026         | 1.011         | 1.026         | Q9NU23       | LYRM2     | LYR motif-containing protein 2                                      |
| 0.976           | 0.971        | 1.004        | 0.977        | 0.941        | 0.993        | 1.017        | 1.030        | 0.977        | 1.055         | 1.010         | 0.992         | Q9HD34       | LYRM4     | LYR motif-containing protein 4                                      |
| 0.921           | 0.963        | 0.958        | 1.006        | 1.002        | 1.017        | 0.969        | 0.968        | 0.993        | 1.018         | 0.947         | 1.036         | P46736       | BRCC3     | Lys-63-specific deubiquitinase BRCC36                               |
| 0.972           | 0.981        | 1.038        | 1.027        | 0.986        | 1.066        | 1.002        | 0.995        | 0.907        | 1.050         | 1.043         | 1.038         | Q1ED39       | KNOP1     | Lysine-rich nucleolar protein 1                                     |
| 1.010           | 1.025        | 1.023        | 0.991        | 0.895        | 0.914        | 1.026        | 1.081        | 0.987        | 0.969         | 0.964         | 1.052         | Q9Y2K7       | KDM2A     | Lysine-specific demethylase 2A                                      |
|                 |              |              |              |              |              |              |              |              | 0.809         | 0.673         | 0.987         | Q8NHM5       | KDM2B     | Lysine-specific demethylase 2B                                      |
| 0.957           | 0.916        | 1.036        | 0.957        | 0.918        | 1.000        | 0.995        | 1.021        | 1.015        | 0.981         | 0.960         | 0.994         | F5H070       | KDM3A     | Lysine-specific demethylase 3A                                      |
| 0.992           | 0.982        | 0.983        | 0.965        | 0.916        | 0.991        | 1.027        | 1.080        | 1.007        | 0.987         | 0.995         | 1.030         | Q7LBC6       | KDM3B     | Lysine-specific demethylase 3B                                      |
| 0.954           | 1.038        | 1.050        |              |              |              |              |              |              | 1.008         | 0.923         | 1.066         | O75164       | KDM4A     | Lysine-specific demethylase 4A                                      |
|                 |              |              | 0.976        | 0.779        | 1.125        |              |              |              |               |               |               | F5GX28       | KDM4B     | Lysine-specific demethylase 4B                                      |
| 0.970           | 1.003        | 1.019        | 0.972        | 0.937        | 1.049        | 0.846        | 0.774        | 1.078        | 0.949         | 1.175         | 1.140         | P29375       | KDM5A     | Lysine-specific demethylase 5A                                      |
| 0.945           | 0.935        | 1.014        | 1.019        | 0.897        | 1.021        | 0.962        | 1.081        | 1.023        | 0.954         | 0.890         | 1.093         | P41229       | KDM5C     | Lysine-specific demethylase 5C                                      |
| 0.983           | 0.990        | 1.012        | 0.955        | 0.939        | 1.043        | 1.036        | 0.951        | 1.040        | 0.992         | 1.019         | 1.095         | O75151       | PHF2      | Lysine-specific demethylase PHF2                                    |
| 1.005           | 1.013        | 0.985        | 1.015        | 0.973        | 0.991        | 1.032        | 1.084        | 0.983        | 0.987         | 0.988         | 1.013         | O60341       | KDM1A     | Lysine-specific histone demethylase 1A                              |
| 1.114           | 1.017        | 1.037        | 1.069        | 1.011        | 0.928        | 0.947        | 1.256        | 0.922        | 0.945         | 1.087         | 1.000         | Q8NB78       | KDM1B     | Lysine-specific histone demethylase 1B                              |
| 0.959           | 1.009        | 0.993        | 0.999        | 1.002        | 1.013        | 0.998        | 1.003        | 0.994        | 0.983         | 1.026         | 0.986         | Q15046       | KARS      | Lysine--tRNA ligase                                                 |
| 1.073           | 0.940        | 1.188        | 1.082        | 1.139        | 1.040        | 0.994        | 0.767        | 1.069        | 1.116         | 0.972         | 1.057         | Q8IV50       | LYSMD2    | LysM and putative peptidoglycan-binding domain-containing protein 2 |
| 0.880           | 0.924        | 0.893        | 1.080        | 1.063        | 0.858        | 1.078        | 1.237        | 1.033        | 1.021         | 1.047         | 0.934         | Q7Z3D4       | LYSMD3    | LysM and putative peptidoglycan-binding domain-containing protein 3 |
| 0.978           | 0.980        | 1.041        | 1.003        | 0.961        | 1.034        | 1.024        | 0.994        | 1.000        | 1.062         | 1.009         | 1.054         | Q6UWP7       | LCLAT1    | Lysocardiolipin acyltransferase 1                                   |
| 1.106           | 1.016        | 1.022        | 1.135        | 1.111        | 1.177        | 1.045        | 1.198        | 1.024        | 1.026         | 1.095         | 1.090         | Q9NPH0       | ACP6      | Lysophosphatidic acid phosphatase type 6                            |
| 1.032           | 0.991        | 1.034        | 0.955        | 0.900        | 1.012        | 0.960        | 0.984        | 0.980        | 0.997         | 1.011         | 1.059         | Q8NF37       | LPCAT1    | Lysophosphatidylcholine acyltransferase 1                           |
| 0.960           | 0.961        | 1.029        | 0.940        | 0.911        | 1.025        | 1.000        | 1.003        | 1.005        | 1.031         | 0.977         | 1.036         | Q7L5N7       | LPCAT2    | Lysophosphatidylcholine acyltransferase 2                           |
| 1.062           | 1.013        | 0.999        | 1.003        | 0.976        | 0.999        | 0.997        | 1.105        | 0.985        | 1.022         | 0.966         | 0.997         | Q5VWZ2       | LYPLAL1   | Lysophospholipase-like protein 1                                    |
| 1.046           | 1.044        | 1.017        | 1.120        | 0.961        | 0.926        |              |              |              | 1.111         | 0.998         | 1.126         | Q6ZNC8       | MBOAT1    | Lysophospholipid acyltransferase 1                                  |
|                 |              |              | 1.131        | 0.885        | 1.140        | 1.018        | 0.819        | 1.119        |               |               |               | Q6ZWT7       | MBOAT2    | Lysophospholipid acyltransferase 2                                  |
| 0.941           | 0.979        | 0.994        | 0.949        | 0.835        | 1.050        | 1.035        | 1.189        | 1.033        | 1.129         | 1.025         | 1.110         | Q6P1A2       | LPCAT3    | Lysophospholipid acyltransferase 5                                  |
| 0.912           | 0.986        | 0.984        | 0.953        | 0.861        | 1.002        | 1.023        | 1.012        | 0.982        | 1.142         | 1.072         | 1.058         | Q96N66       | MBOAT7    | Lysophospholipid acyltransferase 7                                  |
| 0.972           | 0.961        | 1.003        | 0.955        | 0.894        | 1.036        | 0.976        | 1.060        | 1.027        | 0.964         | 0.996         | 1.001         | Q643R3       | LPCAT4    | Lysophospholipid acyltransferase LPCAT4                             |
| 1.118           | 0.925        | 1.041        | 1.343        | 1.058        | 1.112        | 1.566        | 1.365        | 1.452        | 1.657         | 1.301         | 1.477         | P38571       | LIPA      | Lysosomal acid lipase/cholesteryl ester hydrolase                   |
| 1.047           | 1.020        | 1.039        | 1.003        | 0.952        | 1.025        | 1.035        | 0.996        | 1.031        | 1.060         | 1.021         | 1.018         | P11117       | ACP2      | Lysosomal acid phosphatase                                          |
| 1.068           | 1.013        | 1.035        | 1.008        | 0.952        | 0.951        | 0.987        | 1.073        | 0.987        | 0.961         | 0.962         | 0.991         | P10253       | GAA       | Lysosomal alpha-glucosidase                                         |

| Abundance Ratio |              |              |              |              |              |              |              |              |               |               |               | Accession ID | Gene name | Protein Description                                         |
|-----------------|--------------|--------------|--------------|--------------|--------------|--------------|--------------|--------------|---------------|---------------|---------------|--------------|-----------|-------------------------------------------------------------|
| 1 d<br>M1/C1    | 1 d<br>M2/C2 | 1 d<br>M3/C3 | 4 d<br>M1/C1 | 4 d<br>M2/C2 | 4 d<br>M3/C3 | 7 d<br>M1/C1 | 7 d<br>M2/C2 | 7 d<br>M3/C3 | 10 d<br>M1/C1 | 10 d<br>M2/C2 | 10 d<br>M3/C3 |              |           |                                                             |
| 1.108           | 0.977        | 1.031        | 1.068        | 0.955        | 1.028        | 1.059        | 0.949        | 1.020        | 1.103         | 1.055         | 1.044         | Q00754       | MAN2B1    | Lysosomal alpha-mannosidase                                 |
| 1.001           | 0.988        | 1.011        | 1.053        | 1.066        | 1.053        | 1.096        | 1.067        | 1.085        | 1.145         | 1.105         | 1.098         | P42785       | PRCP      | Lysosomal Pro-X carboxypeptidase                            |
| 0.927           | 1.020        | 0.938        | 1.062        | 1.029        | 1.054        | 1.073        | 1.231        | 1.064        | 1.085         | 1.077         | 1.002         | A0A140T8X7   | PPT2      | Lysosomal thioesterase PPT2                                 |
|                 |              |              |              |              |              |              |              |              | 1.497         | 1.490         | 1.527         | Q15012       | LAPTM4A   | Lysosomal-associated transmembrane protein 4A               |
| 1.071           | 1.060        | 0.921        | 0.976        | 0.979        | 1.043        | 1.029        | 1.125        | 0.988        | 1.022         | 1.102         | 1.023         | Q99698       | LYST      | Lysosomal-trafficking regulator                             |
| 0.948           | 0.978        | 0.990        | 0.975        | 0.887        | 1.017        | 1.018        | 1.001        | 1.017        | 1.077         | 1.054         | 0.998         | Q14108       | SCARB2    | Lysosome membrane protein 2                                 |
| 1.024           | 1.022        | 0.990        | 1.043        | 0.975        | 0.979        | 0.947        | 1.051        | 1.092        | 0.980         | 1.048         | 0.886         | P11279       | LAMP1     | Lysosome-associated membrane glycoprotein 1                 |
| 1.034           | 1.009        | 1.048        | 1.008        | 0.995        | 1.106        | 1.071        | 1.086        | 1.103        | 1.134         | 1.073         | 1.061         | P13473       | LAMP2     | Lysosome-associated membrane glycoprotein 2                 |
| 0.844           | 0.834        | 0.679        | 1.097        | 1.262        | 0.917        | 0.691        | 0.760        | 1.196        | 4.121         | 1.119         | 0.718         | P61626       | LYZ       | Lysozyme C                                                  |
| 0.944           | 1.075        | 1.020        | 1.020        | 0.951        | 1.010        | 1.220        | 0.938        | 1.105        | 0.908         | 1.005         | 1.119         | Q9Y4K0       | LOXL2     | Lysyl oxidase homolog 2                                     |
| 0.911           | 0.971        | 1.048        | 0.945        | 1.024        | 1.010        | 0.998        | 1.061        | 1.053        | 1.033         | 1.061         | 0.897         | Q8IU60       | DCP2      | m7GpppN-mRNA hydrolase                                      |
| 1.009           | 0.996        | 0.973        | 0.989        | 0.992        | 1.025        | 0.988        | 1.028        | 0.994        | 0.984         | 1.043         | 1.001         | Q96C86       | DCPS      | m7GpppX diphosphatase                                       |
| 1.017           | 1.007        | 1.029        | 1.022        | 1.091        | 1.098        | 1.045        | 1.072        | 1.081        | 1.057         | 0.994         | 1.091         | Q8WWC4       | MAIP1     | m-AAA protease-interacting protein 1, mitochondrial         |
| 0.852           | 1.147        | 1.009        | 1.029        | 0.817        | 0.791        | 1.003        | 0.918        | 1.093        |               |               |               | Q8N5G2       | TMEM57    | Macoilin                                                    |
| 1.021           | 0.953        | 1.198        |              |              |              |              |              |              |               |               |               | P09603       | CSF1      | Macrophage colony-stimulating factor 1                      |
| 1.003           | 0.939        | 1.060        | 1.015        | 0.881        | 0.983        | 1.061        | 1.062        | 1.055        | 1.072         | 1.015         | 1.023         | E7ESC7       | MAEA      | Macrophage erythroblast attacher                            |
| 1.094           | 0.998        | 1.079        | 1.009        | 1.263        | 0.976        | 0.926        | 0.777        | 1.081        | 0.925         | 0.994         | 0.993         | P14174       | MIF       | Macrophage migration inhibitory factor                      |
| 1.003           | 0.988        | 0.960        | 0.988        | 0.959        | 0.956        | 0.981        | 0.980        | 0.916        | 0.966         | 0.924         | 0.940         | P40121       | CAPG      | Macrophage-capping protein                                  |
| 0.839           | 1.045        | 1.013        | 0.947        | 0.971        | 1.080        | 1.123        | 0.841        | 1.065        | 0.979         | 0.981         | 1.132         | Q04912       | MST1R     | Macrophage-stimulating protein receptor                     |
| 1.039           | 1.050        | 1.039        | 0.991        | 0.978        | 1.036        | 0.992        | 1.029        | 0.987        | 0.984         | 0.897         | 1.011         | Q8NDA8       | MROH1     | Maestro heat-like repeat-containing protein family member 1 |
| 0.973           | 0.969        | 1.014        | 0.986        | 0.842        | 1.045        | 1.125        | 1.099        | 1.048        | 1.164         | 1.087         | 1.098         | Q9HD23       | MRS2      | Magnesium transporter MRS2 homolog, mitochondrial           |
|                 |              |              |              |              |              | 0.945        | 1.113        | 0.812        |               |               |               | Q7RTP0       | NIPA1     | Magnesium transporter NIPA1                                 |
| 1.012           | 0.983        | 1.018        | 0.952        | 0.938        | 1.015        | 1.025        | 0.880        | 1.025        | 1.053         | 0.990         | 0.988         | A0A087WU53   | MAGT1     | Magnesium transporter protein 1                             |
| 1.018           | 0.982        | 1.059        | 0.994        | 0.925        | 1.016        | 1.043        | 1.065        | 0.994        | 1.010         | 1.018         | 1.021         | Q86V88       | MDP1      | Magnesium-dependent phosphatase 1                           |
| 1.000           | 1.022        | 0.996        | 0.979        | 0.969        | 1.029        | 0.991        | 1.041        | 1.028        | 0.958         | 0.942         | 0.972         | Q8N3R9       | MPP5      | MAGUK p55 subfamily member 5                                |
| 1.016           | 0.944        | 1.032        | 1.055        | 1.020        | 1.050        | 1.068        | 1.082        | 0.984        | 0.995         | 1.027         | 1.049         | Q9NZW5       | MPP6      | MAGUK p55 subfamily member 6                                |
| 1.020           | 0.938        | 0.998        | 1.021        | 0.981        | 1.053        | 0.992        | 0.970        | 0.938        | 0.951         | 0.892         | 1.030         | P07199       | CENPB     | Major centromere autoantigen B                              |
| 0.875           | 0.991        | 0.973        | 0.933        | 0.859        | 1.036        | 1.048        | 1.040        | 0.961        | 1.184         | 1.037         | 1.129         | Q14728       | MFSD10    | Major facilitator superfamily domain-containing protein 10  |
|                 |              |              | 0.850        | 0.629        | 0.887        | 1.061        | 1.054        | 1.022        | 1.156         | 0.903         | 0.986         | Q96ES6       | MFSD3     | Major facilitator superfamily domain-containing protein 3   |
|                 |              |              | 1.055        | 0.791        | 1.066        |              |              |              |               |               |               | Q6ZSS7       | MFSD6     | Major facilitator superfamily domain-containing protein 6   |

| Abundance Ratio |              |              |              |              |              |              |              |              |               |               |               | Accession ID | Gene name | Protein Description                                          |
|-----------------|--------------|--------------|--------------|--------------|--------------|--------------|--------------|--------------|---------------|---------------|---------------|--------------|-----------|--------------------------------------------------------------|
| 1 d<br>M1/C1    | 1 d<br>M2/C2 | 1 d<br>M3/C3 | 4 d<br>M1/C1 | 4 d<br>M2/C2 | 4 d<br>M3/C3 | 7 d<br>M1/C1 | 7 d<br>M2/C2 | 7 d<br>M3/C3 | 10 d<br>M1/C1 | 10 d<br>M2/C2 | 10 d<br>M3/C3 |              |           |                                                              |
| 1.204           | 0.946        | 0.874        | 1.043        | 0.915        | 1.001        | 1.141        | 1.041        | 1.054        | 1.075         | 1.037         | 1.043         | Q8NHS3       | MFSD8     | Major facilitator superfamily domain-containing protein 8    |
| 0.893           | 0.985        | 0.959        | 1.140        | 0.981        | 1.146        | 1.214        | 0.964        | 1.088        | 1.189         | 0.996         | 1.309         | P04156       | PRNP      | Major prion protein                                          |
| 1.009           | 0.998        | 1.013        | 1.006        | 1.003        | 1.011        | 1.014        | 1.023        | 1.009        | 1.032         | 1.000         | 1.022         | Q14764       | MVP       | Major vault protein                                          |
| 1.030           | 1.008        | 0.988        | 1.011        | 1.107        | 0.998        | 1.007        | 0.975        | 1.018        | 1.004         | 1.005         | 0.964         | P40926       | MDH2      | Malate dehydrogenase, mitochondrial                          |
| 0.962           | 0.973        | 0.996        | 0.996        | 0.924        | 0.990        | 0.988        | 1.043        | 0.977        | 1.051         | 1.015         | 1.021         | Q14165       | MLEC      | Malectin                                                     |
| 0.986           | 1.001        | 0.951        | 1.022        | 1.057        | 0.969        | 0.948        | 1.166        | 1.027        | 1.189         | 0.998         | 1.148         | Q16626       | MEA1      | Male-enhanced antigen 1                                      |
| 0.946           | 1.041        | 0.926        | 0.976        | 0.867        | 0.940        | 0.981        | 0.991        | 1.030        | 1.026         | 1.079         | 1.132         | Q68DK7       | MSL1      | Male-specific lethal 1 homolog                               |
| 1.138           | 0.960        | 1.031        | 0.901        | 1.019        | 1.026        | 0.959        | 1.021        | 1.021        | 1.066         | 0.780         | 1.274         | Q8N5Y2       | MSL3      | Male-specific lethal 3 homolog                               |
| 1.011           | 0.946        | 0.980        | 0.984        | 0.957        | 1.002        | 1.017        | 1.072        | 1.029        | 1.021         | 0.996         | 0.993         | G3V4T6       | GSTZ1     | Maleylacetoacetate isomerase                                 |
| 1.070           | 1.150        | 0.972        | 1.012        | 0.912        | 1.060        | 0.968        | 1.061        | 1.050        | 1.024         | 0.943         | 1.036         | O95822       | MLYCD     | Malonyl-CoA decarboxylase, mitochondrial                     |
| 1.013           | 1.034        | 1.012        | 1.015        | 0.998        | 1.010        | 1.003        | 1.070        | 1.043        | 0.985         | 0.958         | 1.050         | Q8IVS2       | MCAT      | Malonyl-CoA-acyl carrier protein transacylase, mitochondrial |
| 0.986           | 0.986        | 1.006        | 0.992        | 0.909        | 1.003        | 1.028        | 1.070        | 1.036        | 1.070         | 1.011         | 1.066         | Q9HD20       | ATP13A1   | Manganese-transporting ATPase 13A1                           |
| 1.054           | 1.008        | 0.987        | 0.996        | 0.980        | 1.013        | 0.978        | 1.031        | 1.028        | 0.987         | 1.007         | 0.963         | P34949       | MPI       | Mannose-6-phosphate isomerase                                |
| 1.004           | 1.002        | 0.958        | 0.946        | 0.869        | 1.016        | 1.037        | 1.124        | 1.053        | 1.041         | 1.001         | 1.063         | O75352       | MPDU1     | Mannose-P-dolichol utilization defect 1 protein              |
| 0.985           | 1.117        | 1.053        |              |              |              | 1.125        | 0.820        | 1.132        |               |               |               | P33908       | MAN1A1    | Mannosyl-oligosaccharide 1,2-alpha-mannosidase IA            |
| 1.014           | 0.971        | 1.088        | 1.008        | 0.883        | 0.966        | 0.931        | 0.996        | 0.990        | 0.903         | 0.883         | 0.919         | O60476       | MAN1A2    | Mannosyl-oligosaccharide 1,2-alpha-mannosidase IB            |
| 0.979           | 1.010        | 1.042        | 0.984        | 0.992        | 1.021        | 1.003        | 1.072        | 1.003        | 1.017         | 0.986         | 0.998         | Q13724       | MOGS      | Mannosyl-oligosaccharide glucosidase                         |
| 1.014           | 1.050        | 0.960        | 0.980        | 0.980        | 1.057        | 0.987        | 0.848        | 0.993        | 1.046         | 1.064         | 1.107         | A0A087WZ62   | 3 SV      | Mannosyltransferase                                          |
| 1.001           | 1.008        | 0.981        | 1.025        | 1.021        | 0.996        | 1.044        | 1.050        | 1.026        | 1.089         | 1.031         | 1.091         | P49137       | MAPKAPK2  | MAP kinase-activated protein kinase 2                        |
| 0.976           | 1.002        | 0.973        | 0.992        | 0.980        | 1.003        | 1.039        | 1.007        | 0.954        | 1.091         | 0.982         | 1.061         | Q16644       | MAPKAPK3  | MAP kinase-activated protein kinase 3                        |
| 1.069           | 0.989        | 1.014        | 0.948        | 0.944        | 0.923        | 0.921        | 1.016        | 1.073        | 1.030         | 0.947         | 1.131         | Q9BUB5       | MKNK1     | MAP kinase-interacting serine/threonine-protein kinase 1     |
| 1.352           | 0.782        | 1.268        |              |              |              |              |              |              |               |               |               | Q9HBH9       | MKNK2     | MAP kinase-interacting serine/threonine-protein kinase 2     |
| 1.146           | 0.922        | 1.147        | 0.832        | 0.877        | 1.222        | 0.898        | 0.928        | 0.965        | 1.020         | 0.966         | 1.114         | Q9NS73       | MBIP      | MAP3K12-binding inhibitory protein 1                         |
| 1.001           | 0.991        | 1.067        | 0.985        | 0.958        | 1.010        | 0.972        | 0.928        | 1.032        | 1.032         | 0.963         | 1.045         | Q3KQU3       | MAP7D1    | MAP7 domain-containing protein 1                             |
| 0.861           | 0.968        | 1.065        | 0.969        | 1.002        | 0.984        | 1.024        | 0.833        | 0.933        | 0.999         | 0.980         | 1.071         | Q8IWC1       | MAP7D3    | MAP7 domain-containing protein 3                             |
| 1.004           | 0.945        | 0.904        | 1.021        | 0.951        | 1.090        | 0.896        | 1.058        | 1.040        | 1.012         | 1.032         | 1.177         | Q9BUT9       | MCRIP2    | MAPK regulated corepressor interacting protein 2             |
| 0.964           | 0.947        | 0.994        | 0.887        | 0.976        | 1.024        | 0.950        | 0.817        | 0.925        | 1.023         | 1.027         | 0.954         | P49006       | MARCKSL1  | MARCKS-related protein                                       |
| 1.024           | 0.999        | 1.030        | 1.049        | 0.951        | 1.004        | 1.036        | 1.051        | 1.068        | 1.119         | 1.052         | 1.007         | Q9NZD8       | SPG21     | Maspardin                                                    |
| 0.964           | 1.056        | 1.154        |              |              |              |              |              |              |               |               |               | Q14680       | MELK      | Maternal embryonic leucine zipper kinase                     |
| 1.134           | 1.082        | 1.031        | 0.929        | 0.971        | 0.890        |              |              |              | 0.879         | 0.860         | 0.923         | A0A0R4J2E8   | MATR3     | Matrin-3                                                     |

| Abundance Ratio |              |              |              |              |              |              |              |              |               |               |               | Accession ID | Gene name | Protein Description                                         |
|-----------------|--------------|--------------|--------------|--------------|--------------|--------------|--------------|--------------|---------------|---------------|---------------|--------------|-----------|-------------------------------------------------------------|
| 1 d<br>M1/C1    | 1 d<br>M2/C2 | 1 d<br>M3/C3 | 4 d<br>M1/C1 | 4 d<br>M2/C2 | 4 d<br>M3/C3 | 7 d<br>M1/C1 | 7 d<br>M2/C2 | 7 d<br>M3/C3 | 10 d<br>M1/C1 | 10 d<br>M2/C2 | 10 d<br>M3/C3 |              |           |                                                             |
| 0.975           | 0.989        | 0.981        | 0.984        | 1.005        | 0.967        | 0.984        | 0.905        | 0.969        | 1.037         | 1.027         | 1.041         | A8MXP9       | MATR3     | Matrin-3                                                    |
| 1.019           | 0.990        | 1.025        | 1.011        | 0.955        | 1.035        | 1.033        | 1.069        | 0.992        | 1.069         | 0.962         | 1.028         | P50281       | MMP14     | Matrix metalloproteinase-14                                 |
|                 |              |              |              |              |              | 0.992        | 0.746        | 1.011        | 1.095         | 1.334         | 1.292         | Q9Y5R2       | MMP24     | Matrix metalloproteinase-24                                 |
|                 |              |              | 1.098        | 0.977        | 1.055        |              |              |              |               |               |               | Q8N3F0       | MTURN     | Maturin                                                     |
| 1.032           | 0.994        | 1.021        | 0.964        | 1.004        | 0.986        | 0.949        | 1.038        | 1.107        | 0.979         | 0.947         | 0.968         | Q9Y6X3       | MAU2      | MAU2 chromatid cohesion factor homolog                      |
| 0.934           | 1.156        | 0.901        | 0.964        | 0.988        | 1.015        |              |              |              |               |               |               | H3BU53       | MGA       | MAX gene-associated protein (Fragment)                      |
| 1.175           | 1.004        | 1.064        | 0.954        | 1.065        | 0.973        |              |              |              | 0.991         | 0.985         | 1.074         | Q99583       | MNT       | Max-binding protein MNT                                     |
|                 |              |              |              |              |              | 1.104        | 1.025        | 0.962        |               |               |               | Q9UH92       | MLX       | Max-like protein X                                          |
| 1.036           | 1.135        | 1.163        | 1.002        | 0.957        | 1.074        | 0.844        | 1.400        | 1.081        | 1.034         | 1.023         | 1.079         | Q05BQ5       | MBTD1     | MBT domain-containing protein 1                             |
| 0.996           | 0.813        | 1.097        | 0.893        | 0.921        | 0.997        |              |              |              |               |               |               | Q96DY7       | MTBP      | Mdm2-binding protein                                        |
| 0.978           | 0.967        | 1.030        | 0.996        | 0.974        | 1.030        | 1.001        | 1.016        | 1.008        | 1.000         | 1.026         | 1.038         | Q14676       | MDC1      | Mediator of DNA damage checkpoint protein 1                 |
| 1.006           | 1.026        | 1.031        | 0.961        | 0.977        | 0.998        | 0.976        | 0.979        | 0.988        | 0.985         | 0.985         | 1.011         | Q15648       | MED1      | Mediator of RNA polymerase II transcription subunit 1       |
| 1.058           | 0.942        | 1.006        | 0.993        | 0.871        | 0.999        | 1.033        | 1.073        | 1.054        | 1.039         | 0.982         | 1.061         | Q9BTT4       | MED10     | Mediator of RNA polymerase II transcription subunit 10      |
| 0.763           | 0.947        | 1.020        | 0.920        | 1.073        | 1.136        | 0.911        | 0.923        | 1.086        | 1.145         | 0.941         | 1.167         | Q9P086       | MED11     | Mediator of RNA polymerase II transcription subunit 11      |
| 1.127           | 1.107        | 1.017        | 0.998        | 0.913        | 0.970        | 0.946        | 1.118        | 1.077        | 1.042         | 1.082         | 1.069         | Q9UHV7       | MED13     | Mediator of RNA polymerase II transcription subunit 13      |
| 0.803           | 0.976        | 0.986        | 1.025        | 0.961        | 1.056        | 0.989        | 1.371        | 1.007        | 0.911         | 1.244         | 0.881         | Q71F56       | MED13L    | Mediator of RNA polymerase II transcription subunit 13-like |
| 0.995           | 0.996        | 1.055        | 1.053        | 0.894        | 0.997        | 1.054        | 1.041        | 1.051        | 0.976         | 0.986         | 1.015         | O60244       | MED14     | Mediator of RNA polymerase II transcription subunit 14      |
| 1.038           | 0.951        | 1.041        | 0.998        | 0.954        | 1.024        | 0.980        | 1.022        | 0.992        | 0.946         | 0.980         | 1.022         | Q96RN5       | MED15     | Mediator of RNA polymerase II transcription subunit 15      |
| 0.988           | 1.027        | 1.018        | 0.977        | 0.975        | 1.032        | 0.945        | 1.000        | 0.983        | 0.984         | 1.017         | 1.008         | Q9NVC6       | MED17     | Mediator of RNA polymerase II transcription subunit 17      |
| 1.049           | 0.937        | 0.980        | 0.970        | 1.011        | 0.997        | 0.967        | 1.026        | 0.983        | 0.996         | 1.048         | 1.058         | Q9BUE0       | MED18     | Mediator of RNA polymerase II transcription subunit 18      |
| 0.703           | 1.114        | 1.243        | 1.114        | 1.177        | 1.004        | 0.933        | 1.128        | 1.026        | 0.737         | 1.061         | 0.964         | A0JLT2       | MED19     | Mediator of RNA polymerase II transcription subunit 19      |
| 0.998           | 1.010        | 1.002        | 1.010        | 1.001        | 1.016        | 0.994        | 1.097        | 1.020        | 1.011         | 1.039         | 0.989         | Q9H944       | MED20     | Mediator of RNA polymerase II transcription subunit 20      |
| 1.082           | 1.041        | 0.965        | 0.992        | 1.069        | 1.011        | 0.929        | 1.043        | 1.241        | 0.916         | 0.809         | 1.037         | F5H872       | MED21     | Mediator of RNA polymerase II transcription subunit 21      |
| 0.968           | 0.908        | 0.983        | 0.924        | 0.995        | 0.981        | 1.115        | 1.056        | 1.162        | 1.159         | 1.014         | 1.089         | Q15528       | MED22     | Mediator of RNA polymerase II transcription subunit 22      |

| Abundance Ratio |              |              |              |              |              |              |              |              |               |               |               | Accession ID | Gene name | Protein Description                                                          |
|-----------------|--------------|--------------|--------------|--------------|--------------|--------------|--------------|--------------|---------------|---------------|---------------|--------------|-----------|------------------------------------------------------------------------------|
| 1 d<br>M1/C1    | 1 d<br>M2/C2 | 1 d<br>M3/C3 | 4 d<br>M1/C1 | 4 d<br>M2/C2 | 4 d<br>M3/C3 | 7 d<br>M1/C1 | 7 d<br>M2/C2 | 7 d<br>M3/C3 | 10 d<br>M1/C1 | 10 d<br>M2/C2 | 10 d<br>M3/C3 |              |           |                                                                              |
| 0.978           | 0.987        | 1.034        | 0.963        | 0.897        | 1.090        | 0.968        | 1.028        | 1.065        | 0.987         | 0.995         | 1.039         | Q5JWT2       | MED23     | Mediator of RNA polymerase II transcription subunit 23                       |
| 1.002           | 0.996        | 1.024        | 1.006        | 0.945        | 1.028        | 0.959        | 1.131        | 1.050        | 0.982         | 0.989         | 1.003         | A0A0B4J1W0   | MED24     | Mediator of RNA polymerase II transcription subunit 24                       |
| 1.034           | 1.059        | 1.028        | 1.028        | 0.951        | 1.003        | 1.051        | 1.042        | 0.970        | 0.960         | 1.052         | 1.034         | Q6P2C8       | MED27     | Mediator of RNA polymerase II transcription subunit 27                       |
| 1.105           | 1.038        | 1.001        | 1.043        | 0.971        | 0.923        | 1.005        | 1.158        | 0.926        | 1.006         | 1.002         | 1.126         | Q9H204       | MED28     | Mediator of RNA polymerase II transcription subunit 28                       |
| 1.021           | 1.033        | 1.063        | 0.985        | 0.985        | 1.084        | 1.026        | 0.943        | 1.079        | 0.991         | 1.037         | 1.003         | Q96HR3       | MED30     | Mediator of RNA polymerase II transcription subunit 30                       |
| 0.905           | 0.937        | 1.013        | 0.966        | 0.879        | 1.058        | 0.957        | 1.090        | 1.073        | 1.035         | 0.973         | 0.980         | Q9Y3C7       | MED31     | Mediator of RNA polymerase II transcription subunit 31                       |
| 1.018           | 0.999        | 0.991        | 0.921        | 0.986        | 1.037        | 1.015        | 1.032        | 0.996        | 0.990         | 0.999         | 1.022         | Q9NPJ6       | MED4      | Mediator of RNA polymerase II transcription subunit 4                        |
| 1.016           | 0.997        | 0.981        | 0.971        | 1.046        | 1.074        | 1.070        | 0.986        | 0.999        | 1.058         | 1.031         | 1.034         | A0A087WYL7   | MED6      | Mediator of RNA polymerase II transcription subunit 6                        |
|                 |              |              | 1.087        | 1.014        | 0.733        |              |              |              |               |               |               | O43513       | MED7      | Mediator of RNA polymerase II transcription subunit 7                        |
| 0.729           | 0.881        | 0.958        |              |              |              | 0.833        | 0.971        | 1.377        |               |               |               | Q9NWA0       | MED9      | Mediator of RNA polymerase II transcription subunit 9                        |
| 1.088           | 0.952        | 1.071        | 0.945        | 0.900        | 1.024        | 0.971        | 0.828        | 1.011        | 1.167         | 1.019         | 2.024         | Q9Y4F3       | KIAA0430  | Meiosis arrest female protein 1                                              |
|                 |              |              |              |              |              |              |              |              | 0.874         | 0.446         | 0.752         | A0A087WXM9   | MEIKIN    | Meiosis-specific kinetochore protein                                         |
| 1.012           | 1.041        | 1.043        | 1.112        | 1.043        | 1.020        |              |              |              |               |               |               | Q9BWT6       | MND1      | Meiotic nuclear division protein 1 homolog                                   |
| 1.067           | 0.990        | 1.061        | 1.023        | 0.931        | 1.092        | 0.989        | 1.048        | 0.987        | 1.027         | 0.988         | 0.953         | Q96PC5       | MIA2      | Melanoma inhibitory activity protein 2                                       |
| 0.985           | 0.975        | 1.023        | 1.000        | 0.959        | 1.027        | 1.012        | 0.966        | 1.002        | 1.052         | 1.019         | 1.063         | Q5JRA6       | MIA3      | Melanoma inhibitory activity protein 3                                       |
| 0.955           | 0.989        | 0.995        | 0.943        | 0.954        | 0.984        | 0.942        | 0.940        | 0.974        | 0.982         | 0.929         | 1.019         | Q9UNF1       | MAGED2    | Melanoma-associated antigen D2                                               |
| 0.989           | 0.956        | 0.997        | 1.080        | 0.945        | 0.982        | 1.272        | 0.988        | 0.956        | 1.058         | 0.948         | 1.055         | P08582       | MELTF     | Melanotransferrin                                                            |
| 0.947           | 0.973        | 0.993        | 0.956        | 0.939        | 1.030        | 1.097        | 1.064        | 0.993        | 1.084         | 0.961         | 1.159         | Q4ZIN3       | TMEM259   | Membralin                                                                    |
| 0.963           | 0.982        | 0.989        | 1.030        | 1.058        | 0.847        | 0.963        | 1.088        | 0.958        | 1.019         | 1.139         | 1.028         | Q8N4V1       | MMGT1     | Membrane magnesium transporter 1                                             |
|                 |              |              | 1.017        | 0.996        | 1.041        |              |              |              |               |               |               | Q96QZ7       | MAGI1     | Membrane-associated guanylate kinase, WW and PDZ domain-containing protein 1 |
| 1.153           | 1.026        | 1.027        | 0.992        | 0.986        | 1.061        | 0.958        | 1.107        | 0.974        |               |               |               | Q5TCQ9       | MAGI3     | Membrane-associated guanylate kinase, WW and PDZ domain-containing protein 3 |
| 1.054           | 1.053        | 1.017        | 0.999        | 0.984        | 0.967        | 1.033        | 1.106        | 0.964        | 0.967         | 1.008         | 1.053         | O00562       | PITPNM1   | Membrane-associated phosphatidylinositol transfer protein 1                  |
| 0.956           | 1.010        | 0.985        | 0.995        | 0.959        | 0.994        | 0.985        | 1.000        | 0.979        | 1.017         | 1.025         | 1.027         | O00264       | PGRMC1    | Membrane-associated progesterone receptor component 1                        |
| 0.928           | 1.017        | 1.098        |              |              |              |              |              |              |               |               |               | B4DZM6       | PKMYT1    | Membrane-associated tyrosine- and threonine-specific cdc2-inhibitory kinase  |



| Abundance Ratio |              |              |              |              |              |              |              |              |               |               |               | Accession ID | Gene name | Protein Description                                         |
|-----------------|--------------|--------------|--------------|--------------|--------------|--------------|--------------|--------------|---------------|---------------|---------------|--------------|-----------|-------------------------------------------------------------|
| 1 d<br>M1/C1    | 1 d<br>M2/C2 | 1 d<br>M3/C3 | 4 d<br>M1/C1 | 4 d<br>M2/C2 | 4 d<br>M3/C3 | 7 d<br>M1/C1 | 7 d<br>M2/C2 | 7 d<br>M3/C3 | 10 d<br>M1/C1 | 10 d<br>M2/C2 | 10 d<br>M3/C3 |              |           |                                                             |
| 1.089           | 1.550        | 1.002        | 0.772        | 0.658        | 1.105        |              |              |              |               |               |               | Q14703       | MBTPS1    | Membrane-bound transcription factor site-1 protease         |
|                 |              |              |              |              |              |              |              |              | 1.076         | 0.935         | 1.120         | O43462       | MBTPS2    | Membrane-bound transcription factor site-2 protease         |
| 1.041           | 1.006        | 1.000        | 0.987        | 0.980        | 1.009        | 1.039        | 0.992        | 0.824        | 1.072         | 1.025         | 1.101         | O00255       | MEN1      | Menin                                                       |
| 0.961           | 0.983        | 0.994        | 0.976        | 0.955        | 1.006        | 1.003        | 0.989        | 1.014        | 1.036         | 0.994         | 1.054         | P35240       | NF2       | Merlin                                                      |
| 1.001           | 1.025        | 0.980        | 1.008        | 1.020        | 1.021        | 1.005        | 0.953        | 1.028        | 0.979         | 0.987         | 0.932         | A8K878       | MANF      | Mesencephalic astrocyte-derived neurotrophic factor         |
| 0.911           | 0.992        | 1.092        | 0.950        | 1.152        | 0.991        | 1.093        | 0.807        | 0.940        |               |               |               | Q14872       | MTF1      | Metal regulatory transcription factor 1                     |
| 0.872           | 1.148        | 1.127        |              |              |              |              |              |              |               |               |               | Q9H8M5       | CNNM2     | Metal transporter CNNM2                                     |
| 1.011           | 1.015        | 1.149        | 1.051        | 0.980        | 1.064        | 1.062        | 1.011        | 0.959        | 0.980         | 1.065         | 1.070         | Q8NE01       | CNNM3     | Metal transporter CNNM3                                     |
| 0.949           | 1.046        | 0.967        | 1.048        | 0.923        | 1.000        | 1.039        | 1.180        | 1.021        | 1.032         | 0.985         | 1.013         | Q6P4Q7       | CNNM4     | Metal transporter CNNM4                                     |
| 1.014           | 0.976        | 1.115        | 0.990        | 0.939        | 1.084        | 1.012        | 0.963        | 1.020        | 1.078         | 0.976         | 1.031         | Q68D91       | MBLAC2    | Metallo-beta-lactamase domain-containing protein 2          |
| 1.023           | 0.965        | 1.031        | 0.985        | 0.887        | 1.046        | 0.980        | 1.039        | 1.021        | 0.965         | 0.969         | 0.981         | Q96E52       | OMA1      | Metalloendopeptidase OMA1, mitochondrial                    |
| 1.181           | 0.959        | 0.984        | 0.928        | 0.947        | 1.143        | 1.097        | 0.877        | 1.409        | 0.946         | 0.966         | 1.258         | Q53F39       | MPPE1     | Metallophosphoesterase 1                                    |
| 0.977           | 0.779        | 1.179        | 0.826        | 0.763        | 1.033        | 0.968        | 1.033        | 0.964        | 1.035         | 0.954         | 1.070         | P01033       | TIMP1     | Metalloproteinase inhibitor 1                               |
|                 |              |              |              |              |              |              |              |              | 1.066         | 0.837         | 1.103         | P04731       | MT1A      | Metallothionein-1A                                          |
| 4.002           | 0.750        | 1.797        | 1.433        | 7.537        | 0.796        | 1.755        | 0.117        | 1.322        | 1.246         | 0.918         | 1.024         | P04732       | MT1E      | Metallothionein-1E                                          |
|                 |              |              |              |              |              | 2.200        | 0.187        | 1.644        | 1.218         | 1.056         | 1.273         | P04733       | MT1F      | Metallothionein-1F                                          |
|                 |              |              |              |              |              | 2.236        | 0.341        | 0.607        | 1.407         | 2.097         | 1.284         | P80294       | MT1H      | Metallothionein-1H                                          |
|                 |              |              |              |              |              |              |              |              | 1.087         | 1.129         | 1.372         | Q93083       | MT1L      | Metallothionein-1L                                          |
|                 |              |              |              |              |              |              |              |              | 1.070         | 0.914         | 1.215         | Q8N339       | MT1M      | Metallothionein-1M                                          |
|                 |              |              |              |              |              |              |              |              | 1.059         | 1.129         | 1.127         | P80297       | MT1X      | Metallothionein-1X                                          |
| 3.778           | 0.737        | 1.635        | 1.307        | 6.530        | 0.781        | 1.983        | 0.163        | 1.353        | 1.441         | 0.889         | 1.085         | P02795       | MT2A      | Metallothionein-2                                           |
| 0.978           | 0.964        | 0.978        |              |              |              |              |              |              | 1.134         | 1.197         | 0.974         | Q9Y483       | MTF2      | Metal-response element-binding transcription factor 2       |
| 1.009           | 1.009        | 1.025        | 1.031        | 0.990        | 1.020        | 0.994        | 1.024        | 1.018        | 1.040         | 1.064         | 1.006         | Q13330       | MTA1      | Metastasis-associated protein MTA1                          |
| 1.009           | 0.982        | 1.010        | 0.989        | 0.957        | 0.997        | 0.982        | 0.996        | 1.003        | 0.948         | 0.970         | 1.002         | O94776       | MTA2      | Metastasis-associated protein MTA2                          |
| 0.930           | 0.985        | 1.038        | 0.953        | 0.991        | 1.062        | 1.067        | 0.981        | 1.023        | 1.022         | 1.020         | 1.041         | Q9BTC8       | MTA3      | Metastasis-associated protein MTA3                          |
| 1.040           | 1.009        | 1.051        | 1.033        | 0.923        | 1.005        | 1.073        | 1.030        | 0.993        | 1.024         | 1.044         | 1.041         | A0A0A0MRK6   | MTX1      | Metaxin 1, isoform CRA_b                                    |
| 1.039           | 1.033        | 0.986        | 1.027        | 1.099        | 0.959        | 1.037        | 0.973        | 1.044        | 1.005         | 0.998         | 1.013         | O75431       | MTX2      | Metaxin-2                                                   |
| 0.976           | 1.024        | 0.957        | 1.071        | 0.987        | 1.062        | 1.038        | 0.977        | 1.020        | 0.997         | 1.024         | 0.991         | Q5HYI7       | MTX3      | Metaxin-3                                                   |
|                 |              |              |              |              |              |              |              |              | 1.130         | 1.128         | 1.084         | Q2M296       | MTHFSD    | Methenyltetrahydrofolate synthase domain-containing protein |
| 1.006           | 0.984        | 1.011        | 1.015        | 1.022        | 0.998        | 1.007        | 1.012        | 1.037        | 1.003         | 1.008         | 1.032         | Q9NZL9       | MAT2B     | Methionine adenosyltransferase 2 subunit beta               |

| Abundance Ratio |              |              |              |              |              |              |              |              |               |               |               | Accession ID | Gene name | Protein Description                                                  |
|-----------------|--------------|--------------|--------------|--------------|--------------|--------------|--------------|--------------|---------------|---------------|---------------|--------------|-----------|----------------------------------------------------------------------|
| 1 d<br>M1/C1    | 1 d<br>M2/C2 | 1 d<br>M3/C3 | 4 d<br>M1/C1 | 4 d<br>M2/C2 | 4 d<br>M3/C3 | 7 d<br>M1/C1 | 7 d<br>M2/C2 | 7 d<br>M3/C3 | 10 d<br>M1/C1 | 10 d<br>M2/C2 | 10 d<br>M3/C3 |              |           |                                                                      |
| 1.043           | 0.996        | 0.988        | 1.026        | 1.277        | 0.956        | 1.098        | 0.894        | 1.079        | 1.019         | 1.006         | 0.979         | P53582       | METAP1    | Methionine aminopeptidase 1                                          |
| 1.180           | 0.992        | 0.977        | 0.969        | 0.931        | 1.085        | 1.028        | 1.057        | 0.985        | 1.056         | 0.968         | 1.121         | Q6UB28       | METAP1D   | Methionine aminopeptidase 1D, mitochondrial                          |
| 0.947           | 0.944        | 0.981        | 0.967        | 0.983        | 0.995        | 0.971        | 0.908        | 0.992        | 1.016         | 1.029         | 1.067         | F8VQZ7       | METAP2    | Methionine aminopeptidase 2                                          |
| 0.903           | 0.930        | 0.981        | 0.921        | 0.949        | 0.947        | 0.980        | 0.826        | 0.964        | 1.059         | 1.067         | 1.134         | P50579       | METAP2    | Methionine aminopeptidase 2                                          |
| 1.000           | 0.998        | 1.021        | 1.004        | 1.038        | 1.015        | 0.991        | 1.061        | 1.057        | 1.035         | 0.911         | 1.058         | Q99707       | MTR       | Methionine synthase                                                  |
| 0.853           | 0.990        | 1.026        | 0.961        | 0.918        | 1.069        | 1.016        | 1.060        | 0.992        | 1.195         | 0.953         | 1.174         | Q9UBK8       | MTRR      | Methionine synthase reductase                                        |
| 1.064           | 1.000        | 1.011        | 0.965        | 0.981        | 1.072        | 1.020        | 0.924        | 1.098        | 1.041         | 0.912         | 0.996         | Q9Y3D2       | MSRB2     | Methionine-R-sulfoxide reductase B2, mitochondrial                   |
| 0.992           | 0.998        | 0.997        | 0.992        | 0.993        | 0.993        | 0.973        | 0.982        | 1.002        | 0.975         | 0.993         | 0.977         | P56192       | MARS      | Methionine--tRNA ligase, cytoplasmic                                 |
| 1.114           | 1.060        | 1.042        | 0.986        | 0.949        | 1.014        | 0.997        | 1.074        | 1.021        | 0.947         | 0.995         | 1.040         | Q96GW9       | MARS2     | Methionine--tRNA ligase, mitochondrial                               |
| 1.024           | 0.947        | 1.039        | 1.019        | 0.870        | 0.967        | 1.071        | 1.131        | 1.002        | 1.095         | 1.008         | 1.148         | Q96DP5       | MTFMT     | Methionyl-tRNA formyltransferase, mitochondrial                      |
| 1.002           | 0.970        | 0.969        | 1.001        | 1.011        | 1.008        | 1.010        | 0.944        | 1.064        | 1.043         | 1.029         | 1.018         | P16455       | MGMT      | Methylated-DNA--protein-cysteine methyltransferase                   |
| 1.040           | 0.994        | 0.979        | 1.021        | 0.931        | 1.032        | 1.034        | 1.076        | 1.044        | 0.988         | 1.024         | 0.976         | Q9UBB5       | MBD2      | Methyl-CpG-binding domain protein 2                                  |
| 0.936           | 0.991        | 1.005        | 0.957        | 1.094        | 0.992        | 0.976        | 1.198        | 1.249        | 0.964         | 0.914         | 1.039         | O95983       | MBD3      | Methyl-CpG-binding domain protein 3                                  |
| 0.991           | 0.995        | 0.985        | 0.997        | 0.971        | 0.965        | 1.016        | 1.038        | 0.971        | 1.025         | 1.003         | 0.995         | Q9HCC0       | MCCC2     | Methylcrotonoyl-CoA carboxylase beta chain, mitochondrial            |
| 0.967           | 0.977        | 1.057        | 1.005        | 0.978        | 1.004        | 0.985        | 1.011        | 1.014        | 1.004         | 0.970         | 1.031         | Q96RQ3       | MCCC1     | Methylcrotonoyl-CoA carboxylase subunit alpha, mitochondrial         |
| 1.046           | 0.996        | 1.018        | 1.025        | 0.994        | 1.015        | 1.073        | 1.035        | 1.023        | 1.070         | 0.989         | 1.042         | Q13825       | AUH       | Methylglutaconyl-CoA hydratase, mitochondrial                        |
| 0.949           | 1.020        | 0.966        | 1.004        | 1.005        | 0.998        | 1.002        | 1.046        | 0.993        | 1.031         | 0.983         | 1.016         | Q02252       | ALDH6A1   | Methylmalonate-semialdehyde dehydrogenase [acylating], mitochondrial |
| 1.014           | 1.054        | 1.367        | 0.864        | 1.064        | 1.200        | 0.904        | 0.864        | 1.151        | 0.909         | 0.905         | 1.008         | Q9Y4U1       | MMACHC    | Methylmalonic aciduria and homocystinuria type C protein             |
| 1.205           | 0.966        | 1.039        | 1.096        | 0.935        | 1.020        | 1.015        | 0.979        | 1.028        | 0.966         | 1.032         | 0.995         | Q96PE7       | MCEE      | Methylmalonyl-CoA epimerase, mitochondrial                           |
| 0.993           | 1.011        | 1.036        | 0.971        | 0.989        | 1.014        | 0.998        | 1.009        | 1.013        | 1.033         | 0.988         | 1.050         | P22033       | MUT       | Methylmalonyl-CoA mutase, mitochondrial                              |
| 1.032           | 0.999        | 0.997        | 0.998        | 0.953        | 0.987        | 0.949        | 1.061        | 1.039        | 0.952         | 0.978         | 0.953         | Q9BQA1       | WDR77     | Methylosome protein 50                                               |
| 1.047           | 1.020        | 1.027        | 1.021        | 0.929        | 0.957        | 1.002        | 1.096        | 0.974        | 0.975         | 1.015         | 1.022         | P54105       | CLNS1A    | Methylosome subunit pICln                                            |
| 0.891           | 1.047        | 0.885        | 0.803        | 0.773        | 0.611        | 1.226        | 1.241        | 0.889        | 1.256         | 1.119         | 1.220         | Q15800       | MSMO1     | Methylsterol monooxygenase 1                                         |
| 0.998           | 1.025        | 0.961        | 0.998        | 0.959        | 0.999        | 1.017        | 1.088        | 1.005        | 1.002         | 0.979         | 1.030         | Q9BV20       | MRI1      | Methylthioribose-1-phosphate isomerase                               |
| 0.971           | 0.984        | 1.043        | 1.018        | 1.005        | 0.998        | 0.992        | 1.039        | 0.996        | 1.017         | 1.023         | 0.987         | Q96GX9       | APIP      | Methylthioribulose-1-phosphate dehydratase                           |
| 0.998           | 1.002        | 1.010        | 1.048        | 1.016        | 1.086        | 1.041        | 1.064        | 1.045        | 1.068         | 1.076         | 1.073         | Q96S19       | METTL26   | Methyltransferase-like 26                                            |
| 0.954           | 0.999        | 1.084        | 0.958        | 0.964        | 1.028        | 1.064        | 1.031        | 1.031        | 1.027         | 0.968         | 1.080         | Q8N6R0       | METTL13   | Methyltransferase-like protein 13                                    |
| 1.059           | 0.966        | 1.050        | 1.052        | 1.002        | 0.977        | 1.016        | 1.039        | 1.001        | 1.050         | 1.002         | 1.030         | Q86W50       | METTL16   | Methyltransferase-like protein 16                                    |
| 1.007           | 0.997        | 0.958        | 0.976        | 0.984        | 0.962        | 1.042        | 0.968        | 1.009        | 1.009         | 0.995         | 1.102         | Q6P1Q9       | METTL2B   | Methyltransferase-like protein 2B                                    |
| 1.026           | 1.004        | 1.001        | 1.052        | 0.961        | 1.061        | 1.046        | 1.064        | 1.020        | 0.948         | 0.912         | 1.189         | B8ZZC8       | METTL5    | Methyltransferase-like protein 5                                     |

| Abundance Ratio |              |              |              |              |              |              |              |              |               |               |               | Accession ID | Gene name | Protein Description                                                   |
|-----------------|--------------|--------------|--------------|--------------|--------------|--------------|--------------|--------------|---------------|---------------|---------------|--------------|-----------|-----------------------------------------------------------------------|
| 1 d<br>M1/C1    | 1 d<br>M2/C2 | 1 d<br>M3/C3 | 4 d<br>M1/C1 | 4 d<br>M2/C2 | 4 d<br>M3/C3 | 7 d<br>M1/C1 | 7 d<br>M2/C2 | 7 d<br>M3/C3 | 10 d<br>M1/C1 | 10 d<br>M2/C2 | 10 d<br>M3/C3 |              |           |                                                                       |
| 0.996           | 0.945        | 0.955        | 0.955        | 0.891        | 0.951        | 0.984        | 0.933        | 1.071        | 1.006         | 0.955         | 1.053         | B3KW44       | METTL8    | Methyltransferase-like protein 8                                      |
| 0.953           | 1.157        | 1.057        | 1.021        | 0.955        | 1.048        |              |              |              |               |               |               | Q9H1A3       | METTL9    | Methyltransferase-like protein 9                                      |
| 1.023           | 1.029        | 1.000        | 0.982        | 0.954        | 1.022        | 1.032        | 1.079        | 1.016        | 1.087         | 1.042         | 1.037         | Q03426       | MVK       | Mevalonate kinase                                                     |
| 0.865           | 1.106        | 1.120        |              |              |              | 1.016        | 0.923        | 1.035        |               |               |               | Q6NT16       | SLC18B1   | MFS-type transporter SLC18B1                                          |
| 1.201           | 0.986        | 1.039        | 0.981        | 0.896        | 1.070        | 1.075        | 1.067        | 1.046        | 0.962         | 1.087         | 1.102         | Q29983       | MICA      | MHC class I polypeptide-related sequence A                            |
|                 |              |              | 1.107        | 0.927        | 1.076        |              |              |              | 1.074         | 1.130         | 1.279         | A0A0G2JH58   | MICB      | MHC class I polypeptide-related sequence B                            |
| 1.117           | 1.040        | 1.038        | 0.997        | 0.986        | 1.063        | 0.997        | 1.058        | 1.033        | 0.960         | 1.026         | 1.078         | P22670       | RFX1      | MHC class II regulatory factor RFX1                                   |
| 0.961           | 0.979        | 0.983        | 1.022        | 1.011        | 1.000        | 1.020        | 0.977        | 1.000        | 0.999         | 1.003         | 1.083         | Q8N3F8       | MICALL1   | MICAL-like protein 1                                                  |
| 1.220           | 1.360        | 1.073        | 0.914        | 1.034        | 0.971        | 0.940        | 1.051        | 0.895        | 0.938         | 0.962         | 1.005         | Q8IY33       | MICALL2   | MICAL-like protein 2                                                  |
| 1.810           | 0.840        | 1.277        | 1.206        | 2.098        | 0.970        | 1.238        | 0.687        | 1.293        | 1.079         | 1.025         | 0.987         | Q5TGZ0       | MINOS1    | MICOS complex subunit MIC10                                           |
| 0.984           | 0.946        | 0.963        | 0.979        | 0.950        | 0.993        | 0.998        | 0.845        | 0.978        | 1.074         | 1.018         | 1.045         | A0A140TA86   | C19orf70  | MICOS complex subunit MIC13                                           |
| 1.017           | 0.936        | 1.041        | 1.015        | 0.958        | 1.018        | 1.024        | 1.091        | 1.036        | 1.056         | 1.036         | 1.014         | Q9BUR5       | APOO      | MICOS complex subunit MIC26                                           |
| 1.024           | 1.021        | 1.009        | 0.985        | 0.949        | 0.961        | 0.998        | 1.096        | 0.998        | 1.023         | 1.021         | 0.992         | A0A087WYF7   | APOOL     | MICOS complex subunit                                                 |
| 1.009           | 0.991        | 0.975        | 0.973        | 0.943        | 0.977        | 1.004        | 0.913        | 0.956        | 1.083         | 1.022         | 1.010         | C9JRZ6       | CHCHD3    | MICOS complex subunit                                                 |
| 0.937           | 0.991        | 0.997        | 1.047        | 0.985        | 1.082        | 1.060        | 0.869        | 1.032        | 1.184         | 1.085         | 1.118         | J3QTA6       | CHCHD6    | MICOS complex subunit                                                 |
| 1.017           | 1.043        | 1.040        | 0.999        | 0.956        | 1.023        | 1.016        | 0.955        | 0.980        | 1.087         | 1.052         | 1.063         | P55081       | MFAP1     | Microfibrillar-associated protein 1                                   |
|                 |              |              |              |              |              | 1.176        | 1.019        | 0.933        |               |               |               | O75030       | MITF      | Microphthalmia-associated transcription factor                        |
| 0.972           | 1.033        | 1.035        | 0.936        | 0.950        | 1.057        | 1.024        | 1.013        | 1.113        | 0.989         | 0.936         | 0.835         | Q8WYQ5       | DGCR8     | Microprocessor complex subunit DGCR8                                  |
| 1.112           | 0.983        | 1.035        | 1.077        | 1.309        | 0.976        | 1.037        | 0.937        | 1.184        | 1.044         | 1.040         | 1.016         | P10620       | MGST1     | Microsomal glutathione S-transferase 1                                |
| 1.084           | 0.949        | 1.027        | 1.086        | 0.873        | 1.071        |              |              |              |               |               |               | Q99735       | MGST2     | Microsomal glutathione S-transferase 2                                |
| 0.836           | 0.932        | 0.924        | 0.894        | 0.847        | 0.965        | 0.951        | 0.862        | 0.974        | 1.140         | 1.032         | 1.029         | Q5VV89       | MGST3     | Microsomal glutathione S-transferase 3                                |
| 0.940           | 0.960        | 1.106        | 0.994        | 0.907        | 1.046        | 0.939        | 0.829        | 1.029        | 0.964         | 0.999         | 1.015         | Q9Y4B5       | MTCL1     | Microtubule cross-linking factor 1                                    |
| 0.988           | 0.922        | 0.976        | 0.967        | 0.806        | 1.064        | 1.020        | 1.014        | 1.043        | 0.998         | 0.888         | 1.207         | E9PLY5       | MACF1     | Microtubule-actin cross-linking factor 1, isoforms 1/2/3/5 (Fragment) |
|                 |              |              |              |              |              |              |              |              | 1.009         | 1.135         | 1.085         | H0YD69       | MACF1     | Microtubule-actin cross-linking factor 1, isoforms 1/2/3/5 (Fragment) |
| 0.927           | 1.006        | 1.031        | 0.960        | 0.907        | 1.020        | 1.025        | 1.022        | 1.031        | 1.045         | 0.970         | 1.104         | A0A0A6YYJ5   | MACF1     | Microtubule-actin cross-linking factor 1, isoforms 1/2/3/5            |
| 0.962           | 0.989        | 1.015        | 0.985        | 0.968        | 1.004        | 0.996        | 0.989        | 1.006        | 1.021         | 0.986         | 1.040         | Q9UPN3       | MACF1     | Microtubule-actin cross-linking factor 1, isoforms 1/2/3/5            |
|                 |              |              |              |              |              | 0.964        | 1.059        | 0.955        |               |               |               | E9PGC8       | MAP1A     | Microtubule-associated protein 1A                                     |
| 0.984           | 1.019        | 1.013        | 0.984        | 0.973        | 0.998        | 0.982        | 0.963        | 0.976        | 1.003         | 1.007         | 1.018         | P46821       | MAP1B     | Microtubule-associated protein 1B                                     |
| 0.993           | 1.011        | 1.037        | 0.985        | 0.955        | 1.002        | 0.998        | 1.041        | 1.021        | 1.014         | 0.981         | 1.042         | Q66K74       | MAP1S     | Microtubule-associated protein 1S                                     |
|                 |              |              |              |              |              | 1.085        | 0.896        | 1.157        | 1.023         | 1.250         | 1.688         | P27816       | MAP4      | Microtubule-associated protein 4                                      |
| 0.952           | 0.981        | 0.984        | 0.969        | 0.989        | 0.987        | 0.961        | 0.931        | 0.976        | 0.997         | 1.013         | 1.001         | E7EVA0       | MAP4      | Microtubule-associated protein                                        |

| Abundance Ratio |              |              |              |              |              |              |              |              |               |               |               | Accession ID | Gene name | Protein Description                                         |
|-----------------|--------------|--------------|--------------|--------------|--------------|--------------|--------------|--------------|---------------|---------------|---------------|--------------|-----------|-------------------------------------------------------------|
| 1 d<br>M1/C1    | 1 d<br>M2/C2 | 1 d<br>M3/C3 | 4 d<br>M1/C1 | 4 d<br>M2/C2 | 4 d<br>M3/C3 | 7 d<br>M1/C1 | 7 d<br>M2/C2 | 7 d<br>M3/C3 | 10 d<br>M1/C1 | 10 d<br>M2/C2 | 10 d<br>M3/C3 |              |           |                                                             |
|                 |              |              | 1.085        | 0.672        | 1.104        |              |              |              |               |               |               | A0A0G2JMX7   | MAPT      | Microtubule-associated protein                              |
| 1.018           | 0.992        | 0.991        | 0.978        | 0.986        | 0.991        | 0.992        | 1.050        | 1.014        | 0.993         | 0.979         | 0.996         | Q15691       | MAPRE1    | Microtubule-associated protein RP/EB family member 1        |
| 1.051           | 1.033        | 0.984        | 1.028        | 0.980        | 0.984        | 0.951        | 1.032        | 0.909        | 0.909         | 0.937         | 0.984         | Q15555       | MAPRE2    | Microtubule-associated protein RP/EB family member 2        |
| 1.021           | 0.999        | 0.940        | 1.039        | 0.965        | 1.034        | 1.053        | 1.065        | 1.003        | 1.046         | 0.993         | 1.060         | Q9UPY8       | MAPRE3    | Microtubule-associated protein RP/EB family member 3        |
| 0.997           | 0.985        | 0.977        | 1.049        | 1.002        | 1.076        | 1.109        | 1.096        | 1.084        | 1.010         | 1.115         | 1.011         | A6NCE7       | MAP1LC3B2 | Microtubule-associated proteins 1A/1B light chain 3 beta 2  |
| 1.015           | 0.931        | 1.255        | 1.022        | 0.605        | 1.022        |              |              |              |               |               |               | Q6P0Q8       | MAST2     | Microtubule-associated serine/threonine-protein kinase 2    |
|                 |              |              |              |              |              | 0.993        | 1.009        | 0.996        |               |               |               | Q9NPA3       | MID1IP1   | Mid1-interacting protein 1                                  |
| 0.992           | 0.975        | 1.040        | 0.983        | 0.928        | 1.019        | 0.999        | 1.017        | 1.017        | 0.974         | 0.977         | 1.030         | Q9NU22       | MDN1      | Midasin                                                     |
|                 |              |              | 1.009        | 1.887        | 0.908        | 1.275        | 0.519        | 1.169        | 1.115         | 1.132         | 1.089         | E9PLM6       | MDK       | Midkine                                                     |
| 0.963           | 0.971        | 1.042        | 1.002        | 0.904        | 1.078        | 1.040        | 1.050        | 0.932        | 1.107         | 1.033         | 1.075         | Q9BRT3       | MIEN1     | Migration and invasion enhancer 1                           |
| 1.011           | 0.987        | 0.968        | 0.981        | 0.973        | 0.984        | 0.997        | 0.930        | 0.931        | 1.067         | 0.988         | 1.016         | Q8N183       | NDUFAF2   | Mimitin, mitochondrial                                      |
| 1.040           | 1.001        | 1.019        | 1.015        | 1.014        | 0.992        | 1.063        | 1.067        | 1.048        | 1.015         | 1.003         | 1.016         | Q9BTE3       | MCMBP     | Mini-chromosome maintenance complex-binding protein         |
| 0.869           | 0.999        | 0.988        | 0.910        | 0.842        | 1.034        | 1.030        | 1.003        | 1.005        | 1.125         | 1.011         | 1.061         | Q8TCT9       | HM13      | Minor histocompatibility antigen H13                        |
| 0.915           | 1.049        | 1.048        | 1.011        | 0.922        | 1.037        | 0.962        | 1.053        | 1.011        | 0.942         | 0.940         | 1.033         | Q9H5X1       | FAM96A    | MIP18 family protein FAM96A                                 |
|                 |              |              | 0.939        | 0.882        | 0.988        | 0.900        | 1.246        | 1.009        |               |               |               | Q8TD10       | MIPOL1    | Mirror-image polydactyly gene 1 protein                     |
| 1.024           | 1.006        | 0.922        |              |              |              |              |              |              |               |               |               | Q6P0N0       | MIS18BP1  | Mis18-binding protein 1                                     |
| 1.026           | 1.009        | 1.020        | 1.012        | 0.959        | 0.977        | 0.983        | 1.088        | 1.109        | 0.965         | 1.017         | 1.100         | P54278       | PMS2      | Mismatch repair endonuclease PMS2                           |
| 1.045           | 1.027        | 1.002        | 1.038        | 0.989        | 1.002        | 1.034        | 1.030        | 1.001        | 1.052         | 1.011         | 1.041         | Q8N4C8       | MINK1     | Misshapen-like kinase 1                                     |
| 1.094           | 1.025        | 1.006        | 0.989        | 0.947        | 1.012        | 0.976        | 1.099        | 0.986        | 0.906         | 1.029         | 1.123         | Q8WV92       | MITD1     | MIT domain-containing protein 1                             |
| 0.984           | 0.995        | 1.021        | 0.994        | 0.961        | 0.996        | 1.020        | 1.007        | 1.002        | 0.997         | 0.967         | 1.066         | Q3SY69       | ALDH1L2   | Mitochondrial 10-formyltetrahydrofolate dehydrogenase       |
| 1.011           | 0.989        | 1.043        | 0.974        | 0.900        | 0.987        | 1.027        | 1.075        | 0.943        | 1.050         | 1.008         | 1.022         | Q9BQT8       | SLC25A21  | Mitochondrial 2-oxodicarboxylate carrier                    |
| 1.025           | 1.004        | 1.005        | 0.993        | 0.942        | 0.977        | 0.963        | 1.032        | 0.991        | 0.939         | 0.980         | 0.931         | Q02978       | SLC25A11  | Mitochondrial 2-oxoglutarate/malate carrier protein         |
| 0.962           | 1.002        | 0.968        | 1.001        | 0.938        | 1.051        | 1.059        | 1.096        | 1.020        | 1.195         | 1.037         | 1.098         | Q969Z3       | 2-Mar     | Mitochondrial amidoxime reducing component 2                |
| 0.968           | 1.057        | 1.002        | 0.972        | 1.002        | 0.960        | 1.045        | 1.044        | 0.998        | 1.078         | 1.010         | 1.058         | Q7Z434       |           | Mitochondrial antiviral-signaling protein                   |
| 0.966           | 0.980        | 0.931        | 1.025        | 1.005        | 1.004        | 1.013        | 1.049        | 1.009        | 1.256         | 0.956         | 1.020         | Q96EH3       | MALSU1    | Mitochondrial assembly of ribosomal large subunit protein 1 |
| 0.998           | 0.985        | 1.020        | 1.004        | 0.938        | 1.065        | 1.035        | 0.925        | 0.955        | 1.068         | 0.953         | 0.963         | Q96AQ8       | MCUR1     | Mitochondrial calcium uniporter regulator 1                 |
| 0.997           | 0.998        | 0.990        | 1.001        | 0.975        | 1.031        | 1.069        | 1.053        | 0.975        | 1.038         | 0.977         | 0.998         | O43772       | SLC25A20  | Mitochondrial carnitine/acylcarnitine carrier protein       |

| Abundance Ratio |              |              |              |              |              |              |              |              |               |               |               | Accession ID | Gene name | Protein Description                                             |
|-----------------|--------------|--------------|--------------|--------------|--------------|--------------|--------------|--------------|---------------|---------------|---------------|--------------|-----------|-----------------------------------------------------------------|
| 1 d<br>M1/C1    | 1 d<br>M2/C2 | 1 d<br>M3/C3 | 4 d<br>M1/C1 | 4 d<br>M2/C2 | 4 d<br>M3/C3 | 7 d<br>M1/C1 | 7 d<br>M2/C2 | 7 d<br>M3/C3 | 10 d<br>M1/C1 | 10 d<br>M2/C2 | 10 d<br>M3/C3 |              |           |                                                                 |
| 1.003           | 1.000        | 0.998        | 0.996        | 0.901        | 1.005        | 1.017        | 1.084        | 1.003        | 1.100         | 1.092         | 1.021         | Q9NZJ7       | MTCH1     | Mitochondrial carrier homolog 1                                 |
| 1.020           | 0.943        | 1.022        | 0.960        | 0.960        | 1.115        | 0.963        | 1.049        | 0.923        | 1.010         | 1.025         | 0.947         | E9PIE4       | MTCH2     | Mitochondrial carrier homolog 2 (Fragment)                      |
| 1.049           | 0.992        | 1.002        | 0.983        | 0.892        | 0.961        | 1.074        | 1.052        | 0.987        | 1.051         | 1.035         | 1.073         | Q9Y6C9       | MTCH2     | Mitochondrial carrier homolog 2                                 |
| 1.010           | 1.003        | 1.005        | 1.015        | 0.956        | 1.027        | 1.014        | 1.062        | 0.988        | 0.990         | 0.979         | 0.984         | Q9Y276       | BCS1L     | Mitochondrial chaperone BCS1                                    |
|                 |              |              | 0.912        | 1.017        | 0.979        | 0.926        | 1.089        | 1.016        | 0.905         | 1.342         | 0.932         | Q86VD7       | SLC25A42  | Mitochondrial coenzyme A transporter SLC25A42                   |
| 0.968           | 0.965        | 1.082        | 0.960        | 0.953        | 1.091        | 1.011        | 0.936        | 0.945        | 1.043         | 1.037         | 1.090         | B0QY95       | MIEF1     | Mitochondrial dynamics protein MID51                            |
| 0.899           | 1.008        | 0.997        | 1.070        | 1.067        | 1.161        | 1.134        | 0.994        | 1.113        | 1.020         | 1.011         | 1.080         | Q7L5Y1       | ENOSF1    | Mitochondrial enolase superfamily member 1                      |
| 1.009           | 0.973        | 1.047        | 1.009        | 1.055        | 1.052        | 1.055        | 0.994        | 1.090        | 1.075         | 1.021         | 1.090         | Q9Y3D6       | FIS1      | Mitochondrial fission 1 protein                                 |
| 1.038           | 1.021        | 1.000        | 0.985        | 0.934        | 1.026        | 0.979        | 1.050        | 1.008        | 0.945         | 0.970         | 0.888         | Q9UDX5       | MTFP1     | Mitochondrial fission process protein 1                         |
| 0.898           | 0.933        | 1.041        | 0.960        | 0.966        | 1.023        | 0.881        | 0.820        | 1.040        | 0.948         | 1.023         | 1.009         | Q15390       | MTFR1     | Mitochondrial fission regulator 1                               |
| 0.973           | 1.012        | 1.062        | 0.995        | 0.989        | 1.113        | 0.959        | 0.953        | 1.002        | 1.007         | 0.973         | 1.009         | Q9H019       | MTFR1L    | Mitochondrial fission regulator 1-like                          |
| 0.986           | 1.000        | 0.992        | 1.017        | 0.937        | 1.010        | 0.964        | 1.055        | 0.983        | 0.953         | 0.994         | 1.025         | Q9H2D1       | SLC25A32  | Mitochondrial folate transporter/carrier                        |
| 0.972           | 1.042        | 1.007        | 0.976        | 0.949        | 0.999        | 1.020        | 1.008        | 0.982        | 1.005         | 0.977         | 1.058         | Q9BQP7       | MGME1     | Mitochondrial genome maintenance exonuclease 1                  |
| 0.988           | 0.993        | 1.009        | 0.990        | 0.951        | 1.039        | 1.004        | 1.044        | 0.980        | 0.999         | 1.002         | 1.028         | Q9H936       | SLC25A22  | Mitochondrial glutamate carrier 1                               |
| 1.020           | 0.988        | 0.999        | 0.896        | 0.942        | 1.067        | 0.997        | 0.914        | 0.995        | 1.118         | 1.049         | 1.094         | Q9Y5J6       | TIMM10B   | Mitochondrial import inner membrane translocase subunit Tim10 B |
| 0.997           | 0.905        | 1.053        | 0.964        | 1.012        | 0.967        | 0.974        | 0.802        | 0.998        | 1.033         | 1.026         | 1.051         | P62072       | TIMM10    | Mitochondrial import inner membrane translocase subunit Tim10   |
| 0.960           | 0.933        | 0.954        | 0.962        | 0.984        | 1.015        | 1.006        | 1.029        | 1.010        | 0.937         | 1.014         | 0.918         | Q9Y5L4       | TIMM13    | Mitochondrial import inner membrane translocase subunit Tim13   |
| 1.030           | 1.001        | 0.988        | 1.016        | 1.001        | 0.984        | 1.021        | 1.048        | 0.972        | 1.057         | 1.030         | 0.978         | Q96DA6       | DNAJC19   | Mitochondrial import inner membrane translocase subunit TIM14   |
| 0.980           | 1.104        | 1.070        | 0.980        | 1.130        | 0.986        | 1.018        | 0.947        | 1.071        |               |               |               | Q99595       | TIMM17A   | Mitochondrial import inner membrane translocase subunit Tim17-A |
| 1.036           | 1.009        | 1.027        | 0.979        | 1.029        | 1.027        | 1.020        | 0.871        | 0.991        | 1.099         | 1.013         | 1.062         | O60830       | TIMM17B   | Mitochondrial import inner membrane translocase subunit Tim17-B |
| 0.946           | 1.011        | 0.974        | 0.971        | 0.930        | 0.998        | 1.047        | 0.967        | 0.979        | 1.102         | 1.008         | 1.055         | Q9BVV7       | TIMM21    | Mitochondrial import inner membrane translocase subunit Tim21   |
| 0.919           | 0.984        | 1.017        | 1.074        | 1.017        | 0.912        | 1.050        | 1.026        | 1.070        | 1.086         | 1.028         | 1.083         | Q9Y584       | TIMM22    | Mitochondrial import inner membrane translocase subunit Tim22   |
| 0.935           | 1.003        | 1.030        | 1.078        | 1.029        | 1.051        | 0.904        | 1.154        | 1.085        | 0.973         | 0.920         | 1.022         | O14925       | TIMM23    | Mitochondrial import inner membrane translocase subunit Tim23   |
| 1.130           | 0.920        | 1.091        | 0.998        | 0.920        | 1.002        | 1.077        | 1.064        | 1.063        | 1.080         | 1.005         | 1.086         | Q9BSF4       | TIMM29    | Mitochondrial import inner membrane translocase subunit Tim29   |
| 0.981           | 0.969        | 1.007        | 0.973        | 0.965        | 1.002        | 0.956        | 0.907        | 0.977        | 0.975         | 0.972         | 0.996         | O43615       | TIMM44    | Mitochondrial import inner membrane translocase subunit TIM44   |

| Abundance Ratio |              |              |              |              |              |              |              |              |               |               |               | Accession ID | Gene name | Protein Description                                            |
|-----------------|--------------|--------------|--------------|--------------|--------------|--------------|--------------|--------------|---------------|---------------|---------------|--------------|-----------|----------------------------------------------------------------|
| 1 d<br>M1/C1    | 1 d<br>M2/C2 | 1 d<br>M3/C3 | 4 d<br>M1/C1 | 4 d<br>M2/C2 | 4 d<br>M3/C3 | 7 d<br>M1/C1 | 7 d<br>M2/C2 | 7 d<br>M3/C3 | 10 d<br>M1/C1 | 10 d<br>M2/C2 | 10 d<br>M3/C3 |              |           |                                                                |
| 1.009           | 0.982        | 0.994        | 1.013        | 0.964        | 0.980        | 0.970        | 1.097        | 1.000        | 0.978         | 0.994         | 0.978         | O60220       | TIMM8A    | Mitochondrial import inner membrane translocase subunit Tim8 A |
| 1.085           | 0.980        | 1.029        | 0.943        | 1.129        | 0.979        | 1.023        | 0.876        | 0.981        | 1.096         | 0.953         | 1.091         | G3XAN8       | TIMM8B    | Mitochondrial import inner membrane translocase subunit Tim8 B |
| 0.994           | 0.990        | 0.946        | 0.981        | 1.044        | 0.952        | 0.989        | 0.949        | 0.941        | 1.011         | 1.005         | 0.998         | Q9Y5J7       | TIMM9     | Mitochondrial import inner membrane translocase subunit Tim9   |
| 1.013           | 0.986        | 1.051        | 0.999        | 0.999        | 0.973        | 1.073        | 0.962        | 1.027        | 1.162         | 0.999         | 1.105         | Q15388       | TOMM20    | Mitochondrial import receptor subunit TOM20 homolog            |
| 0.924           | 1.035        | 1.011        | 0.986        | 0.966        | 0.983        | 0.992        | 1.045        | 1.014        | 0.975         | 1.013         | 1.008         | Q9NS69       | TOMM22    | Mitochondrial import receptor subunit TOM22 homolog            |
| 0.986           | 0.984        | 1.013        | 1.001        | 1.023        | 0.999        | 1.012        | 0.972        | 1.041        | 1.047         | 0.993         | 1.046         | Q15785       | TOMM34    | Mitochondrial import receptor subunit TOM34                    |
| 0.914           | 0.997        | 0.983        | 0.965        | 0.913        | 1.018        | 0.981        | 1.027        | 0.937        | 1.015         | 1.019         | 0.996         | O96008       | TOMM40    | Mitochondrial import receptor subunit TOM40 homolog            |
| 1.054           | 0.970        | 0.988        | 0.970        | 0.813        | 0.984        | 1.033        | 0.842        | 1.047        | 1.096         | 1.098         | 0.914         | Q969M1       | TOMM40L   | Mitochondrial import receptor subunit TOM40B                   |
|                 |              |              | 0.944        | 0.940        | 1.112        |              |              |              | 1.046         | 0.945         | 1.218         | Q8N4H5       | TOMM5     | Mitochondrial import receptor subunit TOM5 homolog             |
| 0.849           | 0.765        | 1.092        | 0.896        | 1.000        | 0.997        | 0.962        | 0.986        | 1.001        | 0.915         | 1.000         | 1.169         | Q96B49       | TOMM6     | Mitochondrial import receptor subunit TOM6 homolog             |
| 0.967           | 1.004        | 0.998        | 1.014        | 0.998        | 0.996        | 1.007        | 1.000        | 0.969        | 1.024         | 1.023         | 0.993         | O94826       | TOMM70    | Mitochondrial import receptor subunit TOM70                    |
| 1.108           | 1.005        | 0.980        | 0.974        | 0.971        | 0.987        | 1.028        | 1.027        | 0.989        | 0.952         | 1.011         | 0.944         | Q9Y6H3       | ATP23     | Mitochondrial inner membrane protease ATP23 homolog            |
| 1.027           | 1.042        | 1.133        | 0.900        | 0.880        | 1.038        | 0.914        | 1.079        | 0.981        | 1.010         | 0.997         | 1.077         | Q96LU5       | IMMP1L    | Mitochondrial inner membrane protease subunit 1                |
| 1.101           | 1.118        | 1.299        | 1.073        | 0.807        | 0.904        | 0.867        | 1.566        | 0.709        | 0.873         | 1.026         | 0.987         | Q96T52       | IMMP2L    | Mitochondrial inner membrane protease subunit 2                |
| 0.951           | 0.990        | 1.001        | 1.015        | 0.921        | 1.040        | 1.066        | 1.047        | 0.981        | 1.099         | 1.037         | 1.020         | J3KNA0       | OXA1L     | Mitochondrial inner membrane protein OXA1L                     |
| 0.959           | 0.897        | 0.957        | 0.893        | 0.841        | 0.891        | 0.910        | 0.879        | 0.912        | 0.934         | 0.938         | 0.979         | Q99797       | MIPEP     | Mitochondrial intermediate peptidase                           |
| 1.027           | 0.980        | 1.007        | 0.982        | 0.952        | 0.941        | 1.022        | 1.117        | 1.010        | 0.958         | 1.061         | 0.957         | Q9Y619       | SLC25A15  | Mitochondrial ornithine transporter 1                          |
| 1.086           | 1.027        | 0.990        | 1.039        | 1.025        | 1.001        | 1.018        | 1.014        | 0.920        | 1.103         | 0.966         | 1.033         | Q9UJ68       | MSRA      | Mitochondrial peptide methionine sulfoxide reductase           |
| 1.004           | 1.013        | 0.999        | 1.005        | 1.058        | 0.990        | 0.986        | 1.127        | 1.022        | 0.932         | 0.977         | 0.980         | O95563       | MPC2      | Mitochondrial pyruvate carrier 2                               |
|                 |              |              |              |              |              |              |              |              | 1.512         | 1.019         | 0.837         | A0A087WVZ0   | MPC1      | Mitochondrial pyruvate carrier                                 |
| 1.011           | 0.995        | 1.024        | 1.000        | 0.924        | 0.952        | 1.017        | 1.094        | 1.003        | 1.016         | 1.010         | 1.001         | Q8IXI1       | RHOT2     | Mitochondrial Rho GTPase 2                                     |
| 0.994           | 1.003        | 1.011        | 1.004        | 0.999        | 1.002        | 1.017        | 1.044        | 1.022        | 1.023         | 1.009         | 1.035         | Q7L0Y3       | TRMT10C   | Mitochondrial ribonuclease P protein 1                         |
| 1.018           | 1.000        | 1.040        | 0.924        | 0.968        | 0.969        | 0.971        | 1.000        | 0.997        | 0.927         | 0.938         | 1.021         | O15091       | KIAA0391  | Mitochondrial ribonuclease P protein 3                         |
| 0.950           | 0.995        | 1.038        | 0.986        | 0.941        | 1.074        | 1.046        | 0.978        | 0.979        | 1.066         | 0.988         | 0.950         | Q9BT17       | MTG1      | Mitochondrial ribosome-associated GTPase 1                     |
| 0.852           | 0.869        | 0.903        | 0.897        | 0.841        | 0.935        | 1.008        | 1.006        | 0.965        | 1.031         | 0.969         | 1.046         | Q9H4K7       | MTG2      | Mitochondrial ribosome-associated GTPase 2                     |
| 0.995           | 0.993        | 1.023        | 0.999        | 0.945        | 1.033        | 1.033        | 1.049        | 0.980        | 1.022         | 1.011         | 1.023         | Q9HC21       | SLC25A19  | Mitochondrial thiamine pyrophosphate carrier                   |

| Abundance Ratio |              |              |              |              |              |              |              |              |               |               |               | Accession ID | Gene name | Protein Description                                     |
|-----------------|--------------|--------------|--------------|--------------|--------------|--------------|--------------|--------------|---------------|---------------|---------------|--------------|-----------|---------------------------------------------------------|
| 1 d<br>M1/C1    | 1 d<br>M2/C2 | 1 d<br>M3/C3 | 4 d<br>M1/C1 | 4 d<br>M2/C2 | 4 d<br>M3/C3 | 7 d<br>M1/C1 | 7 d<br>M2/C2 | 7 d<br>M3/C3 | 10 d<br>M1/C1 | 10 d<br>M2/C2 | 10 d<br>M3/C3 |              |           |                                                         |
| 1.036           | 1.001        | 1.016        | 1.005        | 0.947        | 0.971        | 0.994        | 1.144        | 0.960        | 1.013         | 0.986         | 0.955         | O75648       | TRMU      | Mitochondrial tRNA-specific 2-thiouridylase 1           |
| 0.915           | 1.012        | 1.001        | 0.978        | 0.912        | 1.005        | 1.025        | 0.983        | 0.960        | 1.116         | 1.021         | 1.055         | Q969V5       | MUL1      | Mitochondrial ubiquitin ligase activator of NFKB 1      |
| 1.003           | 0.952        | 0.980        | 0.953        | 0.948        | 0.934        | 0.956        | 0.860        | 0.958        | 0.949         | 0.893         | 0.928         | Q10713       | PMPCA     | Mitochondrial-processing peptidase subunit alpha        |
| 0.970           | 0.968        | 0.972        | 0.948        | 0.914        | 0.927        | 0.950        | 0.963        | 0.911        | 0.982         | 0.930         | 0.955         | O75439       | PMPCB     | Mitochondrial-processing peptidase subunit beta         |
| 0.911           | 1.057        | 0.940        | 1.193        | 0.910        | 0.947        | 1.092        | 1.249        | 0.910        | 1.200         | 1.082         | 1.165         | Q9NYZ2       | SLC25A37  | Mitoferrin-1                                            |
|                 |              |              |              |              |              | 1.076        | 0.925        | 1.180        |               |               |               | Q96A46       | SLC25A28  | Mitoferrin-2                                            |
| 1.053           | 1.007        | 1.021        | 1.034        | 0.968        | 1.033        | 1.037        | 1.075        | 1.033        | 1.061         | 1.067         | 1.041         | A0A0C4DFN1   | MFN1      | Mitofusin-1                                             |
| 1.043           | 1.005        | 1.048        | 1.021        | 0.982        | 1.048        | 1.043        | 1.050        | 1.007        | 1.057         | 1.013         | 1.078         | O95140       | MFN2      | Mitofusin-2                                             |
| 0.986           | 0.996        | 0.995        | 1.017        | 1.002        | 1.012        | 1.031        | 1.067        | 1.029        | 1.021         | 0.991         | 1.027         | P28482       | MAPK1     | Mitogen-activated protein kinase 1                      |
| 1.030           | 1.039        | 1.058        | 1.063        | 0.988        | 1.065        | 1.097        | 1.009        | 0.977        | 1.203         | 1.020         | 0.719         | Q15759       | MAPK11    | Mitogen-activated protein kinase 11                     |
| 1.042           | 1.029        | 1.015        | 0.982        | 0.895        | 1.102        | 0.994        | 1.093        | 1.069        | 1.012         | 1.060         | 0.986         | P53778       | MAPK12    | Mitogen-activated protein kinase 12                     |
| 1.134           | 0.899        | 0.910        | 0.940        | 1.004        | 1.059        | 1.060        | 1.205        | 1.035        |               |               |               | O15264       | MAPK13    | Mitogen-activated protein kinase 13                     |
| 0.990           | 1.004        | 1.004        | 0.995        | 0.990        | 1.035        | 1.003        | 1.084        | 1.036        | 0.979         | 0.959         | 0.992         | Q16539       | MAPK14    | Mitogen-activated protein kinase 14                     |
| 0.965           | 0.992        | 0.999        | 1.011        | 0.984        | 1.051        | 1.022        | 1.034        | 1.010        | 1.049         | 1.025         | 1.026         | P27361       | MAPK3     | Mitogen-activated protein kinase 3                      |
| 1.039           | 0.969        | 1.006        | 1.014        | 0.926        | 1.016        | 1.062        | 0.897        | 1.059        | 0.967         | 0.974         | 1.035         | Q13164       | MAPK7     | Mitogen-activated protein kinase 7                      |
| 1.021           | 0.977        | 0.989        | 0.958        | 1.071        | 1.062        | 1.059        | 0.952        | 0.981        | 0.940         | 1.064         | 1.118         | P45983       | MAPK8     | Mitogen-activated protein kinase 8                      |
| 0.979           | 1.013        | 1.030        | 0.997        | 0.982        | 1.032        | 1.033        | 1.045        | 0.969        | 1.004         | 1.021         | 1.009         | P45984       | MAPK9     | Mitogen-activated protein kinase 9                      |
| 1.408           | 0.985        | 0.849        |              |              |              |              |              |              |               |               |               | Q13233       | MAP3K1    | Mitogen-activated protein kinase kinase kinase 1        |
|                 |              |              | 0.933        | 0.792        | 0.971        |              |              |              | 1.011         | 0.951         | 1.040         | Q16584       | MAP3K11   | Mitogen-activated protein kinase kinase kinase 11       |
| 1.091           | 1.017        | 1.024        | 1.009        | 0.955        | 0.994        | 1.033        | 1.005        | 1.007        | 1.005         | 0.960         | 0.989         | Q9Y2U5       | MAP3K2    | Mitogen-activated protein kinase kinase kinase 2        |
| 1.025           | 1.040        | 1.036        | 1.007        | 0.986        | 1.044        | 1.046        | 1.091        | 1.044        | 0.999         | 0.970         | 1.014         | Q9NYL2       | MAP3K20   | Mitogen-activated protein kinase kinase kinase 20       |
| 1.020           | 1.105        | 1.053        | 1.016        | 0.926        | 0.943        | 1.092        | 1.082        | 1.046        | 1.023         | 0.950         | 0.999         | Q9Y6R4       | MAP3K4    | Mitogen-activated protein kinase kinase kinase 4        |
| 0.916           | 1.096        | 0.901        | 0.953        | 0.934        | 1.023        | 1.072        | 1.044        | 0.977        | 0.996         | 0.903         | 1.118         | Q99683       | MAP3K5    | Mitogen-activated protein kinase kinase kinase 5        |
| 1.002           | 1.068        | 0.989        | 1.008        | 0.951        | 1.049        | 0.982        | 1.102        | 1.078        | 1.044         | 1.013         | 0.966         | O95382       | MAP3K6    | Mitogen-activated protein kinase kinase kinase 6        |
| 0.933           | 0.956        | 0.982        | 1.011        | 0.986        | 0.973        | 1.025        | 1.067        | 0.930        | 0.953         | 1.011         | 1.034         | Q12851       | MAP4K2    | Mitogen-activated protein kinase kinase kinase kinase 2 |
| 1.013           | 1.021        | 1.056        | 1.041        | 0.886        | 1.168        | 1.087        | 1.130        | 1.034        | 1.012         | 0.983         | 0.925         | Q8IVH8       | MAP4K3    | Mitogen-activated protein kinase kinase kinase kinase 3 |
| 0.921           | 1.044        | 1.084        | 0.902        | 1.013        | 1.104        | 1.005        | 0.695        | 1.378        |               |               |               | O95819       | MAP4K4    | Mitogen-activated protein kinase kinase kinase kinase 4 |
| 0.980           | 1.026        | 1.020        | 0.988        | 0.929        | 1.000        | 1.038        | 1.036        | 0.975        | 1.035         | 0.951         | 0.997         | A0A0A0MQR1   | MAP4K5    | Mitogen-activated protein kinase kinase kinase kinase   |
| 1.111           | 1.006        | 1.097        | 1.070        | 0.899        | 1.084        | 0.945        | 1.151        | 1.091        | 0.824         | 0.940         | 1.025         | F8W7S1       | MIGA1     | Mitoguardin 1                                           |



| Abundance Ratio |              |              |              |              |              |              |              |              |               |               |               | Accession ID | Gene name | Protein Description                                     |
|-----------------|--------------|--------------|--------------|--------------|--------------|--------------|--------------|--------------|---------------|---------------|---------------|--------------|-----------|---------------------------------------------------------|
| 1 d<br>M1/C1    | 1 d<br>M2/C2 | 1 d<br>M3/C3 | 4 d<br>M1/C1 | 4 d<br>M2/C2 | 4 d<br>M3/C3 | 7 d<br>M1/C1 | 7 d<br>M2/C2 | 7 d<br>M3/C3 | 10 d<br>M1/C1 | 10 d<br>M2/C2 | 10 d<br>M3/C3 |              |           |                                                         |
| 1.000           | 0.997        | 0.988        | 0.994        | 0.974        | 0.980        | 1.010        | 1.039        | 1.016        | 1.004         | 1.001         | 1.016         | O43684       | BUB3      | Mitotic checkpoint protein BUB3                         |
| 1.019           | 0.959        | 1.101        |              |              |              |              |              |              |               |               |               | O43683       | BUB1      | Mitotic checkpoint serine/threonine-protein kinase BUB1 |
|                 |              |              |              |              |              |              |              |              | 1.050         | 1.106         | 1.088         | Q8IVT2       | MISP      | Mitotic interactor and substrate of PLK1                |
| 1.005           | 0.958        | 1.048        | 0.968        | 0.989        | 1.070        | 0.958        | 0.955        | 0.966        | 0.996         | 0.990         | 1.045         | Q9Y6D9       | MAD1L1    | Mitotic spindle assembly checkpoint protein MAD1        |
| 1.014           | 1.026        | 0.986        | 1.040        | 0.975        | 1.031        | 1.053        | 1.046        | 0.979        | 0.906         | 0.945         | 0.952         | Q13257       | MAD2L1    | Mitotic spindle assembly checkpoint protein MAD2A       |
| 0.908           | 0.972        | 1.313        | 1.238        | 1.024        | 1.252        | 0.961        | 0.770        | 1.016        | 1.159         | 1.046         | 1.229         | B1AK44       | MAD2L2    | Mitotic spindle assembly checkpoint protein MAD2B       |
| 1.008           | 0.935        | 1.019        | 0.999        | 0.946        | 0.988        | 0.989        | 0.977        | 1.103        | 1.015         | 0.960         | 1.159         | Q9Y3D0       | FAM96B    | Mitotic spindle-associated MMXD complex subunit MIP18   |
|                 |              |              |              |              |              |              |              |              | 0.928         | 0.940         | 0.993         | Q08AG7       | MZT1      | Mitotic-spindle organizing protein 1                    |
|                 |              |              | 1.081        | 1.121        | 1.163        | 1.105        | 1.394        | 1.247        | 0.753         | 1.131         | 1.119         | Q6P582       | MZT2A     | Mitotic-spindle organizing protein 2A                   |
| 1.040           | 0.970        | 1.040        | 0.952        | 1.077        | 1.064        | 0.942        | 0.925        | 1.012        | 0.873         | 0.959         | 1.048         | B8ZZ87       | MZT2B     | Mitotic-spindle organizing protein 2B                   |
| 0.991           | 1.018        | 1.015        | 0.975        | 0.944        | 0.963        | 1.021        | 1.011        | 0.977        | 1.043         | 0.870         | 1.082         | Q8NB16       | MLKL      | Mixed lineage kinase domain-like protein                |
| 1.028           | 0.998        | 0.978        | 1.031        | 0.946        | 1.011        | 1.020        | 1.035        | 1.028        | 1.038         | 0.992         | 1.020         | Q9BYG3       | NIFK      | MKI67 FHA domain-interacting nucleolar phosphoprotein   |
| 1.030           | 0.992        | 1.030        | 0.996        | 0.950        | 1.008        | 0.995        | 1.081        | 0.998        | 0.947         | 0.955         | 1.068         | W0Z7M9       | mkl1      | MKL/myocardin-like protein 1                            |
|                 |              |              | 1.015        | 0.955        | 0.992        | 0.965        | 1.166        | 0.928        |               |               |               | O95772       | STARD3NL  | MLN64 N-terminal domain homolog                         |
| 0.975           | 0.977        | 0.903        | 1.089        | 1.063        | 0.954        |              |              |              | 1.030         | 1.067         | 0.994         | Q9HAP2       | MLXIP     | MLX-interacting protein                                 |
| 0.961           | 1.089        | 1.044        | 0.984        | 0.963        | 1.082        | 1.041        | 1.047        | 1.015        | 1.013         | 0.964         | 1.048         | Q495G5       | MMAA      | MMAA protein                                            |
|                 |              |              |              |              |              | 0.848        | 0.883        | 1.832        |               |               |               | A0A0U1RRL7   | MMP24-AS1 | MMP24 antisense RNA 1                                   |
| 1.096           | 1.035        | 0.992        | 1.090        | 0.807        | 0.976        | 1.053        | 0.853        | 0.953        | 1.212         | 0.759         | 1.016         | Q96BX8       | MOB3A     | MOB kinase activator 3A                                 |
| 0.875           | 0.823        | 1.334        | 1.148        | 0.969        | 0.984        | 1.120        | 1.149        | 1.013        |               |               |               | X6R3L3       | MOB3C     | MOB kinase activator 3C                                 |
| 1.032           | 0.953        | 1.038        | 1.035        | 1.080        | 1.045        | 1.031        | 0.826        | 1.101        | 1.004         | 1.000         | 1.057         | Q9Y3A3       | MOB4      | MOB-like protein phocein                                |
| 0.933           | 0.999        | 0.996        | 0.870        | 0.949        | 0.964        | 0.901        | 1.377        | 1.101        |               |               |               | Q9BWK5       | MRI       | Modulator of retrovirus infection homolog               |
| 0.999           | 1.004        | 0.993        | 0.994        | 0.973        | 1.003        | 0.958        | 0.992        | 0.976        | 0.951         | 0.987         | 0.949         | P26038       | MSN       | Moesin                                                  |
| 0.996           | 1.000        | 1.046        | 0.955        | 0.901        | 0.988        | 1.002        | 1.038        | 0.996        | 0.995         | 0.933         | 1.086         | Q9NZB8       | MOCS1     | Molybdenum cofactor biosynthesis protein 1              |
| 1.037           | 0.974        | 1.013        | 1.058        | 0.972        | 1.006        | 1.081        | 1.144        | 1.212        | 1.030         | 1.000         | 1.026         | Q96EN8       | MOCOS     | Molybdenum cofactor sulfurase                           |
| 1.025           | 1.012        | 1.069        | 1.019        | 0.917        | 1.002        | 1.007        | 1.108        | 1.040        | 1.021         | 0.975         | 1.037         | O96007       | MOCS2     | Molybdopterin synthase catalytic subunit                |
| 0.934           | 0.915        | 0.970        | 0.941        | 0.944        | 1.013        | 1.028        | 0.971        | 1.012        | 1.051         | 0.990         | 1.047         | O96033       | MOCS2     | Molybdopterin synthase sulfur carrier subunit           |
| 1.182           | 1.184        | 1.068        | 1.019        | 1.035        | 1.277        | 0.950        | 1.097        | 1.040        | 1.127         | 0.854         | 1.042         | X6R3V9       | MON1A     | MON1 homolog A (Yeast), isoform CRA_b                   |
| 1.028           | 1.075        | 0.952        | 0.973        | 0.899        | 1.091        | 1.006        | 1.104        | 0.964        | 0.983         | 0.960         | 0.951         | Q9BV23       | ABHD6     | Monoacylglycerol lipase ABHD6                           |
| 0.924           | 0.989        | 1.012        | 0.982        | 0.912        | 0.994        | 0.966        | 0.868        | 1.037        | 1.064         | 1.113         | 1.121         | P53985       | SLC16A1   | Monocarboxylate transporter 1                           |
| 0.906           | 0.961        | 1.029        | 0.962        | 0.932        | 1.199        | 0.976        | 0.912        | 1.015        | 1.110         | 1.036         | 1.068         | O60669       | SLC16A7   | Monocarboxylate transporter 2                           |

| Abundance Ratio |              |              |              |              |              |              |              |              |               |               |               | Accession ID | Gene name | Protein Description                                        |
|-----------------|--------------|--------------|--------------|--------------|--------------|--------------|--------------|--------------|---------------|---------------|---------------|--------------|-----------|------------------------------------------------------------|
| 1 d<br>M1/C1    | 1 d<br>M2/C2 | 1 d<br>M3/C3 | 4 d<br>M1/C1 | 4 d<br>M2/C2 | 4 d<br>M3/C3 | 7 d<br>M1/C1 | 7 d<br>M2/C2 | 7 d<br>M3/C3 | 10 d<br>M1/C1 | 10 d<br>M2/C2 | 10 d<br>M3/C3 |              |           |                                                            |
| 1.003           | 1.016        | 0.982        | 1.028        | 0.899        | 1.137        | 1.086        | 1.152        | 1.045        | 1.103         | 1.131         | 1.043         | O15427       | SLC16A3   | Monocarboxylate transporter 4                              |
|                 |              |              |              |              |              | 0.728        | 0.649        | 0.824        |               |               |               | P36021       | SLC16A2   | Monocarboxylate transporter 8                              |
| 1.004           | 0.871        | 1.034        |              |              |              |              |              |              |               |               |               | P08571       | CD14      | Monocyte differentiation antigen CD14                      |
| 0.889           | 1.045        | 0.992        | 1.005        | 1.127        | 1.009        | 1.069        | 1.005        | 1.140        | 1.179         | 1.018         | 1.079         | Q6UB35       | MTHFD1L   | Monofunctional C1-tetrahydrofolate synthase, mitochondrial |
| 1.057           | 1.056        | 1.051        | 1.008        | 0.979        | 0.969        | 1.011        | 1.049        | 0.939        | 0.931         | 0.902         | 0.942         | A0A0C4DFN3   | MGLL      | Monoglyceride lipase                                       |
| 1.046           | 1.025        | 1.009        | 0.970        | 0.992        | 1.042        | 0.935        | 0.897        | 0.932        | 1.055         | 0.998         | 1.039         | Q9Y6X9       | MORC2     | MORC family CW-type zinc finger protein 2                  |
| 1.028           | 0.975        | 1.041        | 0.974        | 0.960        | 1.037        | 0.982        | 1.015        | 1.006        | 0.983         | 0.989         | 1.080         | Q14149       | MORC3     | MORC family CW-type zinc finger protein 3                  |
|                 |              |              | 0.970        | 0.889        | 0.832        |              |              |              |               |               |               | Q8TE76       | MORC4     | MORC family CW-type zinc finger protein 4                  |
|                 |              |              |              |              |              |              |              |              | 0.801         | 0.750         | 1.184         | Q9Y605       | MRFAP1    | MORF4 family-associated protein 1                          |
| 1.042           | 1.001        | 0.991        | 1.023        | 0.998        | 0.971        | 1.048        | 1.092        | 0.981        | 1.054         | 1.006         | 1.013         | B3KTM8       | MORF4L1   | Mortality factor 4-like protein 1                          |
| 0.986           | 0.974        | 0.995        | 0.982        | 0.900        | 1.029        | 1.003        | 1.052        | 0.950        | 1.041         | 0.975         | 1.039         | Q15014       | MORF4L2   | Mortality factor 4-like protein 2                          |
| 0.897           | 1.009        | 0.976        | 1.029        | 1.030        | 1.074        | 1.072        | 0.859        | 0.997        | 1.086         | 1.031         | 1.074         | Q15796       | SMAD2     | Mothers against decapentaplegic homolog 2                  |
| 0.933           | 0.952        | 0.945        | 0.948        | 0.915        | 0.966        | 1.051        | 1.030        | 0.980        | 1.026         | 0.976         | 1.056         | P84022       | SMAD3     | Mothers against decapentaplegic homolog 3                  |
| 1.020           | 1.018        | 1.015        | 0.982        | 1.011        | 0.946        | 1.037        | 0.996        | 1.014        | 1.036         | 0.920         | 0.976         | Q13485       | SMAD4     | Mothers against decapentaplegic homolog 4                  |
| 1.063           | 1.007        | 1.062        | 1.003        | 1.039        | 1.031        | 1.025        | 0.917        | 1.035        | 1.199         | 1.048         | 1.091         | Q99717       | SMAD5     | Mothers against decapentaplegic homolog 5                  |
| 1.054           | 1.048        | 1.034        | 1.014        | 0.966        | 1.002        | 0.990        | 1.074        | 1.029        | 0.975         | 1.003         | 1.052         | Q8NHP6       | MOSPD2    | Motile sperm domain-containing protein 2                   |
| 1.144           | 0.983        | 1.261        |              |              |              | 0.847        | 0.975        | 0.932        | 0.881         | 0.817         | 1.210         | P50219       | MXN1      | Motor neuron and pancreas homeobox protein 1               |
| 1.078           | 1.005        | 1.084        |              |              |              |              |              |              |               |               |               | P30307       | CDC25C    | M-phase inducer phosphatase 3                              |
| 0.988           | 1.047        | 1.104        | 0.993        | 1.007        | 1.111        | 1.025        | 1.068        | 1.165        | 1.008         | 1.041         | 1.143         | Q99547       | MPHOSPH6  | M-phase phosphoprotein 6                                   |
| 1.029           | 0.989        | 1.017        | 0.985        | 0.929        | 1.016        | 1.005        | 1.004        | 1.024        | 0.963         | 0.979         | 1.011         | Q99549       | MPHOSPH8  | M-phase phosphoprotein 8                                   |
| 1.105           | 1.069        | 1.045        | 1.016        | 0.931        | 0.986        | 1.034        | 1.231        | 1.023        | 1.045         | 0.959         | 1.003         | Q567V2       | MPV17L2   | Mpv17-like protein 2                                       |
| 1.039           | 0.941        | 1.027        | 0.979        | 0.910        | 0.998        | 0.912        | 1.013        | 1.023        | 0.946         | 0.951         | 1.049         | Q9NV56       | MRGBP     | MRG/MORF4L-binding protein                                 |
| 0.982           | 0.918        | 1.041        | 0.965        | 0.852        | 1.008        | 0.858        | 1.148        | 1.069        | 0.906         | 1.099         | 0.940         | Q6NTE8       | MRNIP     | MRN complex-interacting protein                            |
|                 |              |              | 0.918        | 0.919        | 0.930        | 1.104        | 1.254        | 0.893        | 1.091         | 1.124         | 1.179         | M0R0H3       | ZFP36     | mRNA decay activator protein ZFP36 (Fragment)              |
| 0.980           | 1.014        | 1.049        | 0.964        | 1.006        | 0.960        | 0.981        | 0.947        | 0.972        | 1.051         | 1.039         | 1.076         | Q07352       | ZFP36L1   | mRNA decay activator protein ZFP36L1                       |
| 1.020           | 1.038        | 1.060        | 1.024        | 1.046        | 1.019        | 0.977        | 0.998        | 0.988        | 1.004         | 1.073         | 1.126         | P47974       | ZFP36L2   | mRNA decay activator protein ZFP36L2                       |
| 1.017           | 1.016        | 1.018        | 1.018        | 1.037        | 0.968        | 1.002        | 0.991        | 1.016        | 0.989         | 1.031         | 0.983         | P78406       | RAE1      | mRNA export factor                                         |
| 0.988           | 0.998        | 1.011        | 1.005        | 0.995        | 1.009        | 1.030        | 1.070        | 1.041        | 0.990         | 1.017         | 1.013         | Q9UKD2       | MRT04     | mRNA turnover protein 4 homolog                            |
| 1.017           | 1.008        | 1.011        | 1.017        | 0.993        | 1.031        | 1.010        | 0.969        | 1.002        | 0.969         | 0.890         | 1.053         | O60942       | RNGTT     | mRNA-capping enzyme                                        |
| 1.114           | 1.020        | 1.070        | 1.043        | 0.930        | 1.011        | 1.035        | 1.137        | 1.027        | 1.039         | 1.017         | 1.033         | Q9NPI6       | DCP1A     | mRNA-decapping enzyme 1A                                   |
|                 |              |              |              |              |              | 1.092        | 1.186        | 1.526        |               |               |               | Q8IZD4       | DCP1B     | mRNA-decapping enzyme 1B                                   |
| 0.997           | 1.001        | 1.006        | 0.955        | 0.925        | 1.009        | 0.976        | 1.014        | 0.998        | 1.005         | 0.980         | 1.039         | Q96T58       | SPEN      | Msx2-interacting protein                                   |
| 0.984           | 0.874        | 0.968        | 0.949        | 0.910        | 0.980        | 0.992        | 0.972        | 0.959        | 0.988         | 1.014         | 1.038         | E9PNP3       | AAMDC     | Mth938 domain-containing protein                           |

| Abundance Ratio |              |              |              |              |              |              |              |              |               |               |               | Accession ID | Gene name | Protein Description                                                |
|-----------------|--------------|--------------|--------------|--------------|--------------|--------------|--------------|--------------|---------------|---------------|---------------|--------------|-----------|--------------------------------------------------------------------|
| 1 d<br>M1/C1    | 1 d<br>M2/C2 | 1 d<br>M3/C3 | 4 d<br>M1/C1 | 4 d<br>M2/C2 | 4 d<br>M3/C3 | 7 d<br>M1/C1 | 7 d<br>M2/C2 | 7 d<br>M3/C3 | 10 d<br>M1/C1 | 10 d<br>M2/C2 | 10 d<br>M3/C3 |              |           |                                                                    |
| 0.986           | 0.998        | 1.002        | 0.995        | 0.977        | 1.005        | 1.019        | 1.019        | 1.002        | 1.026         | 1.017         | 1.032         | B7ZM99       | MTHFD1L   | MTHFD1L protein                                                    |
| 0.900           | 1.091        | 1.207        | 0.973        | 0.913        | 1.286        |              |              |              | 1.018         | 0.933         | 1.204         | Q9GZU1       | MCOLN1    | Mucolipin-1                                                        |
| 0.998           | 0.996        | 0.999        | 1.014        | 0.969        | 0.998        | 1.028        | 0.991        | 1.048        | 1.017         | 0.963         | 1.078         | Q9UDY8       | MALT1     | Mucosa-associated lymphoid tissue lymphoma translocation protein 1 |
| 0.955           | 0.987        | 1.025        | 0.966        | 0.889        | 1.026        | 1.083        | 0.956        | 1.051        | 1.025         | 0.992         | 1.081         | P08183       | ABCB1     | Multidrug resistance protein 1                                     |
| 0.962           | 0.995        | 1.017        | 0.998        | 0.918        | 1.043        | 1.017        | 0.992        | 1.031        | 1.060         | 1.041         | 1.042         | O15439       | ABCC4     | Multidrug resistance-associated protein 4                          |
| 0.804           | 0.821        | 1.000        |              |              |              |              |              |              | 1.065         | 0.858         | 0.837         | O15440       | ABCC5     | Multidrug resistance-associated protein 5                          |
| 1.020           | 0.989        | 0.993        | 0.989        | 1.114        | 0.999        | 1.001        | 1.041        | 1.093        | 1.030         | 1.037         | 1.068         | Q9UI30       | TRMT112   | Multifunctional methyltransferase subunit TRM112-like protein      |
| 0.978           | 0.971        | 0.996        | 0.998        | 1.034        | 0.985        | 0.998        | 1.011        | 0.976        | 0.962         | 0.980         | 0.982         | P22234       | PAICS     | Multifunctional protein ADE2                                       |
| 1.029           | 1.027        | 0.965        | 1.021        | 0.967        | 0.927        | 1.003        | 1.083        | 0.937        | 1.033         | 1.050         | 0.887         | Q8NI22       | MCFD2     | Multiple coagulation factor deficiency protein 2                   |
|                 |              |              | 1.128        | 0.995        | 1.092        | 1.073        | 1.231        | 1.102        | 1.156         | 1.174         | 1.142         | Q9H1U4       | MEGF9     | Multiple epidermal growth factor-like domains protein 9            |
| 0.968           | 1.006        | 1.017        | 1.049        | 0.951        | 1.012        | 1.008        | 1.038        | 1.006        | 1.034         | 0.973         | 1.043         | Q9UNW1       | MINPP1    | Multiple inositol polyphosphate phosphatase 1                      |
| 1.038           | 0.988        | 0.970        | 1.031        | 1.025        | 0.952        | 1.005        | 1.031        | 1.007        | 1.028         | 1.015         | 1.026         | Q9BU76       | MMTAG2    | Multiple myeloma tumor-associated protein 2                        |
| 1.018           | 0.996        | 1.039        | 0.985        | 0.911        | 0.939        | 1.020        | 0.999        | 1.021        | 1.005         | 1.030         | 1.086         | F5H1U9       | MPDZ      | Multiple PDZ domain protein                                        |
| 1.043           | 0.939        | 1.133        | 0.973        | 1.125        | 1.053        | 1.067        | 1.094        | 1.032        | 0.985         | 0.986         | 1.031         | Q96EY5       | MVB12A    | Multivesicular body subunit 12A                                    |
|                 |              |              | 0.917        | 0.966        | 1.059        | 1.020        | 0.978        | 1.045        |               |               |               | F6XAJ2       | MUSK      | Muscle, skeletal receptor tyrosine-protein kinase (Fragment)       |
| 1.083           | 1.028        | 1.009        | 1.039        | 1.207        | 0.993        | 1.040        | 0.916        | 1.029        | 0.995         | 0.999         | 1.033         | A0A0A0MQX8   | MBNL1     | Muscleblind-like protein 1                                         |
| 1.102           | 1.076        | 0.935        | 1.025        | 0.875        | 0.981        | 1.115        | 1.065        | 1.044        | 1.069         | 0.847         | 0.953         | Q5VZF2       | MBNL2     | Muscleblind-like protein 2                                         |
| 1.028           | 1.041        | 0.933        | 1.105        | 0.859        | 0.958        | 1.225        | 1.009        | 0.928        | 1.052         | 0.972         | 1.055         | Q9UL63       | MKLN1     | Muskelin                                                           |
|                 |              |              | 0.988        | 0.942        | 0.930        |              |              |              |               |               |               | Q6P1R3       | MSANTD2   | Myb/SANT-like DNA-binding domain-containing protein 2              |
| 1.030           | 0.987        | 0.988        | 0.847        | 0.947        | 1.031        | 0.888        | 0.550        | 0.910        | 1.124         | 0.932         | 1.165         | Q96H12       | MSANTD3   | Myb/SANT-like DNA-binding domain-containing protein 3              |
| 1.019           | 0.988        | 0.997        | 1.016        | 0.995        | 1.015        | 1.005        | 1.036        | 1.023        | 0.986         | 0.997         | 0.974         | Q9NUJ1       | ABHD10    | Mycophenolic acid acyl-glucuronide esterase, mitochondrial         |
| 1.042           | 1.004        | 0.965        | 0.926        | 0.934        | 1.069        | 0.988        | 0.905        | 0.965        | 1.079         | 1.038         | 1.095         | P02686       | MBP       | Myelin basic protein                                               |
| 0.967           | 0.987        | 1.025        | 1.060        | 1.003        | 1.107        | 1.061        | 1.094        | 1.050        | 1.087         | 1.024         | 1.157         | O95297       | MPZL1     | Myelin protein zero-like protein 1                                 |
| 1.022           | 1.003        | 1.014        | 1.007        | 1.038        | 1.009        | 1.023        | 1.002        | 1.028        | 1.011         | 0.978         | 1.008         | A0A0A0MST0   | MYD88     | Myeloid differentiation primary response protein MyD88             |
| 0.951           | 1.002        | 1.106        | 0.951        | 0.931        | 1.017        | 1.003        | 0.866        | 1.012        | 1.108         | 0.989         | 1.147         | Q15773       | MLF2      | Myeloid leukemia factor 2                                          |
| 0.936           | 1.073        | 0.955        | 0.953        | 0.891        | 1.000        | 1.048        | 1.144        | 1.057        | 1.091         | 1.093         | 1.044         | Q96S97       | MYADM     | Myeloid-associated differentiation marker                          |
| 1.010           | 1.017        | 0.984        | 1.002        | 0.987        | 0.987        | 0.940        | 1.073        | 0.952        | 0.952         | 0.976         | 0.918         | Q969H8       | MYDGF     | Myeloid-derived growth factor                                      |
| 0.989           | 0.997        | 1.022        | 1.018        | 0.973        | 1.016        | 1.037        | 1.027        | 1.043        | 1.037         | 1.058         | 1.019         | Q9NZM1       | MYOF      | Myoferlin                                                          |
| 0.962           | 0.907        | 1.119        | 1.014        | 0.959        | 1.000        | 0.834        | 1.037        | 0.942        |               |               |               | P02144       | MB        | Myoglobin                                                          |

| Abundance Ratio |              |              |              |              |              |              |              |              |               |               |               | Accession ID | Gene name | Protein Description                                   |
|-----------------|--------------|--------------|--------------|--------------|--------------|--------------|--------------|--------------|---------------|---------------|---------------|--------------|-----------|-------------------------------------------------------|
| 1 d<br>M1/C1    | 1 d<br>M2/C2 | 1 d<br>M3/C3 | 4 d<br>M1/C1 | 4 d<br>M2/C2 | 4 d<br>M3/C3 | 7 d<br>M1/C1 | 7 d<br>M2/C2 | 7 d<br>M3/C3 | 10 d<br>M1/C1 | 10 d<br>M2/C2 | 10 d<br>M3/C3 |              |           |                                                       |
| 0.882           | 0.948        | 1.005        | 0.878        | 0.944        | 1.072        | 0.944        | 0.949        | 0.978        | 0.968         | 0.940         | 1.039         | E9PL24       | PDE4DIP   | Myomegalin                                            |
| 0.996           | 0.987        | 1.105        | 0.970        | 1.007        | 1.000        | 1.020        | 1.055        | 1.095        | 0.998         | 0.995         | 1.068         | P52179       | MYOM1     | Myomesin-1                                            |
| 0.987           | 0.973        | 0.992        | 1.013        | 0.954        | 1.055        | 1.043        | 0.956        | 0.999        | 1.054         | 0.930         | 1.107         | P14649       | MYL6B     | Myosin light chain 6B                                 |
|                 |              |              |              |              |              |              |              |              | 0.856         | 0.680         | 0.610         | G8JLA2       | MYL6      | Myosin light polypeptide 6                            |
| 0.966           | 0.995        | 0.945        | 1.010        | 0.991        | 0.982        | 0.980        | 0.991        | 0.979        | 0.971         | 0.986         | 0.962         | G3V1V0       | MYL6      | Myosin light polypeptide 6                            |
| 1.024           | 0.911        | 1.054        | 1.058        | 0.880        | 1.024        | 0.963        | 0.997        | 0.978        | 1.037         | 0.918         | 0.898         | H0Y2S9       | MPRIP     | Myosin phosphatase Rho-interacting protein (Fragment) |
| 0.984           | 0.993        | 1.010        | 0.999        | 0.943        | 0.949        | 0.923        | 0.988        | 0.989        | 0.903         | 1.007         | 0.895         | J3QRS3       | MYL12A    | Myosin regulatory light chain 12A                     |
| 0.995           | 1.015        | 1.005        | 1.026        | 0.993        | 0.938        | 1.027        | 1.004        | 0.985        | 0.962         | 0.968         | 0.969         | P24844       | MYL9      | Myosin regulatory light polypeptide 9                 |
| 0.969           | 1.002        | 0.990        | 0.996        | 1.029        | 0.967        | 0.998        | 0.975        | 0.996        | 0.971         | 0.978         | 0.981         | P35579       | MYH9      | Myosin-9                                              |
| 0.941           | 0.991        | 0.952        | 0.998        | 0.971        | 0.999        | 1.004        | 1.004        | 0.976        | 1.010         | 0.972         | 0.993         | P58546       | MTPN      | Myotrophin                                            |
| 1.063           | 1.063        | 1.049        | 0.982        | 0.966        | 0.993        | 0.998        | 1.002        | 1.020        | 0.965         | 0.980         | 1.017         | Q13496       | MTM1      | Myotubularin                                          |
| 1.016           | 1.006        | 1.060        | 0.989        | 0.970        | 1.064        | 1.047        | 1.010        | 1.012        | 0.995         | 1.005         | 1.104         | F8WA39       | MTMR1     | Myotubularin-related protein 1                        |
| 1.084           | 1.096        | 1.002        | 0.977        | 0.966        | 0.982        | 1.018        | 1.073        | 1.017        | 1.011         | 1.011         | 0.972         | Q9NXD2       | MTMR10    | Myotubularin-related protein 10                       |
| 1.023           | 0.998        | 1.050        | 1.009        | 0.970        | 1.007        | 1.003        | 1.006        | 1.028        | 1.024         | 0.999         | 1.083         | Q9C0I1       | MTMR12    | Myotubularin-related protein 12                       |
| 0.912           | 0.970        | 1.026        | 0.961        | 0.974        | 0.928        | 0.965        | 0.950        | 1.100        |               |               |               | Q86WG5       | SBF2      | Myotubularin-related protein 13                       |
| 1.076           | 0.979        | 1.010        | 1.029        | 1.018        | 0.990        | 1.029        | 0.976        | 1.000        | 0.986         | 1.003         | 0.981         | Q8NCE2       | MTMR14    | Myotubularin-related protein 14                       |
| 1.087           | 1.049        | 1.084        | 1.039        | 0.941        | 0.976        | 0.970        | 1.042        | 0.996        | 0.946         | 0.984         | 1.007         | Q13614       | MTMR2     | Myotubularin-related protein 2                        |
| 1.112           | 0.929        | 1.047        | 1.136        | 0.920        | 0.978        | 1.172        | 0.922        | 0.978        | 0.973         | 1.022         | 1.069         | Q13615       | MTMR3     | Myotubularin-related protein 3                        |
|                 |              |              | 0.849        | 0.879        | 1.091        |              |              |              |               |               |               | Q9NYA4       | MTMR4     | Myotubularin-related protein 4                        |
| 0.952           | 1.005        | 1.124        | 0.988        | 0.936        | 1.044        | 0.964        | 1.020        | 1.072        | 1.051         | 1.036         | 1.058         | Q9Y217       | MTMR6     | Myotubularin-related protein 6                        |
| 1.097           | 0.919        | 1.117        | 0.951        | 0.950        | 1.007        | 0.963        | 0.994        | 1.073        | 1.017         | 1.023         | 1.046         | Q96QG7       | MTMR9     | Myotubularin-related protein 9                        |
| 1.046           | 1.054        | 1.040        | 1.005        | 1.031        | 1.106        | 1.127        | 0.989        | 0.982        | 1.153         | 1.031         | 1.147         | P29966       | MARCKS    | Myristoylated alanine-rich C-kinase substrate         |
| 1.046           | 0.968        | 1.001        | 1.019        | 1.021        | 1.012        | 1.015        | 0.988        | 0.989        | 1.088         | 1.047         | 1.025         | P20933       | AGA       | N(4)-(beta-N-acetylglucosaminy)-L-asparaginase        |
| 0.984           | 0.991        | 0.976        | 0.979        | 0.972        | 0.983        | 0.991        | 0.943        | 0.996        | 1.012         | 0.979         | 1.014         | O94760       | DDAH1     | N(G),N(G)-dimethylarginine dimethylaminohydrolase 1   |
| 1.003           | 0.992        | 0.994        | 0.988        | 0.987        | 0.983        | 0.971        | 0.958        | 0.983        | 0.982         | 0.969         | 1.007         | O95865       | DDAH2     | N(G),N(G)-dimethylarginine dimethylaminohydrolase 2   |
| 1.031           | 0.976        | 1.001        | 0.993        | 0.931        | 1.007        | 1.017        | 1.026        | 1.040        | 0.985         | 0.946         | 1.030         | Q86U44       | METTL3    | N6-adenosine-methyltransferase 70 kDa subunit         |
| 0.970           | 0.987        | 1.099        | 0.993        | 1.043        | 1.063        | 1.055        | 0.988        | 1.023        | 1.023         | 0.952         | 1.041         | Q9HCE5       | METTL14   | N6-adenosine-methyltransferase subunit METTL14        |
| 0.974           | 0.985        | 0.976        | 0.986        | 0.983        | 1.022        | 0.999        | 1.015        | 1.021        | 1.025         | 0.987         | 1.045         | O14745       | SLC9A3R1  | Na(+)/H(+) exchange regulatory cofactor NHE-RF1       |
| 1.003           | 0.880        | 1.078        | 1.033        | 0.976        | 1.011        | 1.004        | 0.991        | 0.987        | 1.032         | 0.984         | 1.041         | Q15599       | SLC9A3R2  | Na(+)/H(+) exchange regulatory cofactor NHE-RF2       |
|                 |              |              | 1.014        | 0.978        | 0.975        | 1.027        | 0.880        | 0.973        | 1.209         | 1.062         | 1.067         | Q5T2W1       | PDZK1     | Na(+)/H(+) exchange regulatory cofactor NHE-RF3       |
| 0.998           | 0.985        | 1.026        | 0.997        | 0.979        | 0.996        | 0.962        | 0.934        | 1.025        | 1.013         | 1.014         | 1.045         | Q01415       | GALK2     | N-acetylgalactosamine kinase                          |

| Abundance Ratio |              |              |              |              |              |              |              |              |               |               |               | Accession ID | Gene name | Protein Description                                                  |
|-----------------|--------------|--------------|--------------|--------------|--------------|--------------|--------------|--------------|---------------|---------------|---------------|--------------|-----------|----------------------------------------------------------------------|
| 1 d<br>M1/C1    | 1 d<br>M2/C2 | 1 d<br>M3/C3 | 4 d<br>M1/C1 | 4 d<br>M2/C2 | 4 d<br>M3/C3 | 7 d<br>M1/C1 | 7 d<br>M2/C2 | 7 d<br>M3/C3 | 10 d<br>M1/C1 | 10 d<br>M2/C2 | 10 d<br>M3/C3 |              |           |                                                                      |
| 1.016           | 0.982        | 1.009        | 1.055        | 0.989        | 1.010        | 0.985        | 1.005        | 0.996        | 1.005         | 1.007         | 0.997         | P34059       | GALNS     | N-acetylgalactosamine-6-sulfatase                                    |
| 1.134           | 1.050        | 0.978        | 0.930        | 0.925        | 1.079        | 0.922        | 0.935        | 0.810        | 1.054         | 0.877         | 0.838         | E9PBY3       | GALNT7    | N-acetylgalactosaminyltransferase 7                                  |
| 0.996           | 1.002        | 1.009        | 0.983        | 0.897        | 0.979        | 1.001        | 0.959        | 0.951        | 0.980         | 0.972         | 0.977         | Q86SF2       | GALNT7    | N-acetylgalactosaminyltransferase 7                                  |
| 1.005           | 1.012        | 1.211        | 0.977        | 1.089        | 1.167        |              |              |              |               |               |               | Q9UK23       | NAGPA     | N-acetylglucosamine-1-phosphodiester alpha-N-acetylglucosaminidase   |
| 1.004           | 0.966        | 0.912        | 1.033        | 0.896        | 1.215        | 1.255        | 0.917        | 0.996        | 1.068         | 0.965         | 1.005         | Q9UJJ9       | GNPTG     | N-acetylglucosamine-1-phosphotransferase subunit gamma               |
| 0.995           | 1.013        | 1.112        | 0.999        | 0.970        | 0.982        |              |              |              | 1.012         | 1.119         | 1.172         | Q9Y303       | AMDHD2    | N-acetylglucosamine-6-phosphate deacetylase                          |
| 1.002           | 1.009        | 1.003        | 1.015        | 1.053        | 1.038        | 1.072        | 1.070        | 1.063        | 1.094         | 1.082         | 1.015         | P15586       | GNS       | N-acetylglucosamine-6-sulfatase                                      |
|                 |              |              |              |              |              |              |              |              | 0.932         | 1.067         | 0.793         | Q9Y2B2       | PIGL      | N-acetylglucosaminyl-phosphatidylinositol de-N-acetylase             |
|                 |              |              |              |              |              |              |              |              | 0.897         | 0.768         | 1.048         | Q9NY97       | B3GNT2    | N-acetylglucosaminide beta-1,3-N-acetylglucosaminyltransferase 2     |
| 1.024           | 0.973        | 1.021        | 1.037        | 1.101        | 1.011        | 1.021        | 0.932        | 0.979        | 1.051         | 1.044         | 1.125         | O95671       | ASMTL     | N-acetylserotonin O-methyltransferase-like protein                   |
| 0.981           | 0.863        | 0.882        | 0.980        | 0.900        | 1.051        | 0.979        | 1.156        | 0.940        | 1.085         | 1.098         | 1.155         | Q8WUY8       | NAT14     | N-acetyltransferase 14                                               |
|                 |              |              | 1.041        | 0.806        | 1.131        | 1.133        | 1.143        | 1.133        |               |               |               | J3KT72       | NAT9      | N-acetyltransferase 9                                                |
| 1.028           | 0.997        | 0.976        | 1.033        | 0.987        | 1.086        | 1.089        | 1.217        | 1.152        | 1.149         | 1.037         | 1.145         | Q02083       | NAAA      | N-acyl ethanolamine-hydrolyzing acid amidase                         |
| 1.018           | 0.997        | 1.049        | 0.999        | 0.993        | 1.017        | 0.978        | 1.022        | 0.974        | 0.994         | 0.980         | 0.989         | Q8NFW8       | CMAS      | N-acylneuraminate cytidyltransferase                                 |
| 0.976           | 0.970        | 1.036        | 0.926        | 0.997        | 1.171        |              |              |              | 1.068         | 0.964         | 1.081         | Q8TBE9       | NANP      | N-acylneuraminate-9-phosphatase                                      |
| 1.035           | 0.978        | 1.006        | 0.994        | 1.011        | 1.009        | 1.000        | 0.935        | 1.020        | 1.029         | 1.021         | 1.034         | Q4G0N4       | NADK2     | NAD kinase 2, mitochondrial                                          |
| 0.986           | 0.993        | 0.991        | 0.986        | 0.916        | 0.973        | 1.007        | 1.019        | 0.968        | 1.035         | 0.986         | 0.981         | Q13423       | NNT       | NAD(P) transhydrogenase, mitochondrial                               |
| 1.055           | 1.005        | 0.993        | 1.034        | 0.997        | 1.003        | 0.974        | 1.016        | 0.988        | 1.007         | 1.044         | 0.921         | P15559       | NQO1      | NAD(P)H dehydrogenase [quinone] 1                                    |
| 0.984           | 0.984        | 1.003        | 0.990        | 0.981        | 0.995        | 0.994        | 1.077        | 1.008        | 0.967         | 0.997         | 0.968         | Q8NCW5       | NAXE      | NAD(P)H-hydrate epimerase                                            |
| 1.013           | 0.980        | 1.012        | 1.010        | 0.996        | 0.992        | 1.028        | 1.004        | 1.009        | 0.998         | 0.996         | 0.992         | P23368       | ME2       | NAD-dependent malic enzyme, mitochondrial                            |
| 0.993           | 1.000        | 1.007        | 0.986        | 0.933        | 1.087        | 1.007        | 1.028        | 1.019        | 1.009         | 1.028         | 1.049         | Q96EB6       | SIRT1     | NAD-dependent protein deacetylase sirtuin-1                          |
| 1.069           | 1.026        | 1.030        | 1.046        | 0.951        | 1.023        | 1.030        | 1.126        | 1.001        | 0.971         | 1.017         | 0.983         | A0A087WYM3   | SIRT2     | NAD-dependent protein deacetylase sirtuin-2                          |
| 1.014           | 1.117        | 1.027        | 0.967        | 1.079        | 1.066        | 1.055        | 1.021        | 1.048        | 1.060         | 0.977         | 1.015         | Q9NTG7       | SIRT3     | NAD-dependent protein deacetylase sirtuin-3, mitochondrial           |
| 0.958           | 0.860        | 1.005        | 1.032        | 0.980        | 0.957        | 0.981        | 1.153        | 0.985        | 1.082         | 0.883         | 1.154         | Q8N6T7       | SIRT6     | NAD-dependent protein deacetylase sirtuin-6                          |
| 1.036           | 1.032        | 0.981        | 0.746        | 0.712        | 1.606        |              |              |              | 0.946         | 1.024         | 1.206         | Q9NRC8       | SIRT7     | NAD-dependent protein deacetylase sirtuin-7                          |
| 1.007           | 0.969        | 1.062        | 1.024        | 1.133        | 0.957        | 1.087        | 1.024        | 0.957        | 1.106         | 0.987         | 1.018         | Q9NXA8       | SIRT5     | NAD-dependent protein deacylase sirtuin-5, mitochondrial             |
| 1.090           | 0.961        | 1.026        | 1.026        | 1.088        | 1.107        | 0.991        | 1.067        | 1.121        | 0.996         | 0.976         | 1.041         | Q330K2       | NDUFAF6   | NADH dehydrogenase (ubiquinone) complex I, assembly factor 6         |
| 0.978           | 1.006        | 1.017        | 1.012        | 0.957        | 1.017        | 1.008        | 1.053        | 0.966        | 1.064         | 1.015         | 1.049         | Q9BU61       | NDUFAF3   | NADH dehydrogenase [ubiquinone] 1 alpha subcomplex assembly factor 3 |

| Abundance Ratio |              |              |              |              |              |              |              |              |               |               |               | Accession ID | Gene name | Protein Description                                                                   |
|-----------------|--------------|--------------|--------------|--------------|--------------|--------------|--------------|--------------|---------------|---------------|---------------|--------------|-----------|---------------------------------------------------------------------------------------|
| 1 d<br>M1/C1    | 1 d<br>M2/C2 | 1 d<br>M3/C3 | 4 d<br>M1/C1 | 4 d<br>M2/C2 | 4 d<br>M3/C3 | 7 d<br>M1/C1 | 7 d<br>M2/C2 | 7 d<br>M3/C3 | 10 d<br>M1/C1 | 10 d<br>M2/C2 | 10 d<br>M3/C3 |              |           |                                                                                       |
| 1.062           | 0.967        | 0.974        | 0.995        | 0.966        | 1.025        | 1.036        | 0.974        | 0.990        | 1.104         | 0.994         | 0.987         | Q9P032       | NDUFAF4   | NADH dehydrogenase [ubiquinone] 1 alpha subcomplex assembly factor 4                  |
|                 |              |              |              |              |              |              |              |              | 1.091         | 1.051         | 1.091         | A1L188       | NDUFAF8   | NADH dehydrogenase [ubiquinone] 1 alpha subcomplex assembly factor 8                  |
| 1.019           | 1.014        | 0.981        | 1.021        | 1.092        | 0.997        | 1.030        | 0.997        | 1.018        | 1.072         | 1.047         | 0.999         | E7ESZ7       | NDUFA10   | NADH dehydrogenase [ubiquinone] 1 alpha subcomplex subunit 10, mitochondrial          |
| 1.021           | 0.991        | 0.949        | 0.996        | 0.970        | 0.981        | 0.990        | 1.093        | 0.959        | 1.042         | 1.028         | 0.966         | Q9UI09       | NDUFA12   | NADH dehydrogenase [ubiquinone] 1 alpha subcomplex subunit 12                         |
| 0.963           | 0.997        | 1.013        | 1.021        | 1.122        | 1.020        | 1.050        | 0.878        | 1.031        | 0.983         | 0.976         | 1.042         | O43678       | NDUFA2    | NADH dehydrogenase [ubiquinone] 1 alpha subcomplex subunit 2                          |
| 0.973           | 0.999        | 0.915        | 1.001        | 1.066        | 0.923        | 1.135        | 1.021        | 1.011        | 1.140         | 1.039         | 0.985         | O95167       | NDUFA3    | NADH dehydrogenase [ubiquinone] 1 alpha subcomplex subunit 3                          |
| 0.994           | 0.978        | 0.980        | 0.957        | 0.991        | 1.025        | 1.014        | 1.027        | 1.014        | 1.017         | 0.985         | 1.038         | Q16718       | NDUFA5    | NADH dehydrogenase [ubiquinone] 1 alpha subcomplex subunit 5                          |
| 1.011           | 0.973        | 1.004        | 0.931        | 0.944        | 1.038        | 0.938        | 1.004        | 0.996        | 0.990         | 0.952         | 1.023         | P56556       | NDUFA6    | NADH dehydrogenase [ubiquinone] 1 alpha subcomplex subunit 6                          |
| 1.069           | 0.984        | 1.015        | 1.012        | 1.039        | 0.991        | 0.993        | 0.898        | 0.943        | 1.065         | 1.021         | 0.986         | O95182       | NDUFA7    | NADH dehydrogenase [ubiquinone] 1 alpha subcomplex subunit 7                          |
| 0.905           | 0.995        | 0.842        | 1.027        | 0.961        | 1.007        | 0.977        | 1.005        | 1.088        | 1.032         | 0.995         | 0.974         | P51970       | NDUFA8    | NADH dehydrogenase [ubiquinone] 1 alpha subcomplex subunit 8                          |
| 1.037           | 1.009        | 1.009        | 0.998        | 0.984        | 1.027        | 1.025        | 1.087        | 0.999        | 1.034         | 0.967         | 0.974         | Q16795       | NDUFA9    | NADH dehydrogenase [ubiquinone] 1 alpha subcomplex subunit 9, mitochondrial           |
| 0.988           | 1.041        | 1.035        | 0.995        | 1.075        | 1.004        | 1.008        | 1.036        | 1.031        | 1.123         | 0.994         | 1.100         | O75438       | NDUFB1    | NADH dehydrogenase [ubiquinone] 1 beta subcomplex subunit 1                           |
| 1.016           | 0.994        | 0.998        | 0.994        | 0.975        | 1.007        | 1.006        | 0.987        | 1.001        | 1.075         | 1.015         | 1.050         | O96000       | NDUFB10   | NADH dehydrogenase [ubiquinone] 1 beta subcomplex subunit 10                          |
| 1.209           | 0.861        | 1.329        | 0.696        | 1.023        | 1.039        | 0.867        | 0.602        | 0.855        | 1.079         | 1.041         | 1.308         | O95178       | NDUFB2    | NADH dehydrogenase [ubiquinone] 1 beta subcomplex subunit 2, mitochondrial            |
| 0.990           | 0.951        | 0.969        | 0.945        | 0.953        | 0.949        | 1.009        | 1.003        | 0.996        | 1.010         | 0.960         | 0.991         | O43676       | NDUFB3    | NADH dehydrogenase [ubiquinone] 1 beta subcomplex subunit 3                           |
| 1.015           | 0.974        | 0.995        | 1.009        | 0.984        | 0.969        | 1.069        | 1.006        | 1.009        | 1.063         | 1.033         | 1.028         | O95168       | NDUFB4    | NADH dehydrogenase [ubiquinone] 1 beta subcomplex subunit 4                           |
| 0.992           | 0.969        | 0.994        | 1.021        | 0.945        | 1.035        | 1.048        | 0.952        | 1.003        | 1.102         | 0.990         | 1.006         | H0Y886       | NDUFB5    | NADH dehydrogenase [ubiquinone] 1 beta subcomplex subunit 5, mitochondrial (Fragment) |
| 0.965           | 0.978        | 0.987        | 0.999        | 1.019        | 1.017        | 1.119        | 0.971        | 0.978        | 1.092         | 1.030         | 0.983         | O95139       | NDUFB6    | NADH dehydrogenase [ubiquinone] 1 beta subcomplex subunit 6                           |
| 0.901           | 0.907        | 0.875        | 0.913        | 0.972        | 1.046        | 1.025        | 0.883        | 0.966        | 1.133         | 1.011         | 0.983         | P17568       | NDUFB7    | NADH dehydrogenase [ubiquinone] 1 beta subcomplex subunit 7                           |
| 1.010           | 0.990        | 0.965        | 1.010        | 0.884        | 0.999        | 1.057        | 1.046        | 0.937        | 1.087         | 1.013         | 0.961         | O95169       | NDUFB8    | NADH dehydrogenase [ubiquinone] 1 beta subcomplex subunit 8, mitochondrial            |

| Abundance Ratio |              |              |              |              |              |              |              |              |               |               |               | Accession ID | Gene name | Protein Description                                                  |
|-----------------|--------------|--------------|--------------|--------------|--------------|--------------|--------------|--------------|---------------|---------------|---------------|--------------|-----------|----------------------------------------------------------------------|
| 1 d<br>M1/C1    | 1 d<br>M2/C2 | 1 d<br>M3/C3 | 4 d<br>M1/C1 | 4 d<br>M2/C2 | 4 d<br>M3/C3 | 7 d<br>M1/C1 | 7 d<br>M2/C2 | 7 d<br>M3/C3 | 10 d<br>M1/C1 | 10 d<br>M2/C2 | 10 d<br>M3/C3 |              |           |                                                                      |
| 1.018           | 1.007        | 0.956        | 0.978        | 0.961        | 0.979        | 0.975        | 1.025        | 0.991        | 1.028         | 1.034         | 0.984         | Q9Y6M9       | NDUFB9    | NADH dehydrogenase [ubiquinone] 1 beta subcomplex subunit 9          |
| 0.943           | 0.878        | 1.083        | 1.052        | 1.015        | 1.043        | 1.142        | 0.778        | 0.880        | 1.103         | 1.011         | 1.207         | O43677       | NDUFC1    | NADH dehydrogenase [ubiquinone] 1 subunit C1, mitochondrial          |
| 1.022           | 1.006        | 0.991        | 1.028        | 1.013        | 1.003        | 1.043        | 1.015        | 0.986        | 1.167         | 1.019         | 0.972         | O95298       | NDUFC2    | NADH dehydrogenase [ubiquinone] 1 subunit C2                         |
| 1.030           | 1.004        | 1.000        | 0.999        | 0.978        | 1.001        | 1.028        | 1.023        | 1.001        | 1.042         | 0.989         | 1.013         | P49821       | NDUFV1    | NADH dehydrogenase [ubiquinone] flavoprotein 1, mitochondrial        |
| 1.031           | 0.985        | 1.015        | 0.980        | 0.962        | 0.987        | 0.987        | 0.996        | 1.014        | 1.049         | 1.005         | 1.052         | E7EPT4       | NDUFV2    | NADH dehydrogenase [ubiquinone] flavoprotein 2, mitochondrial        |
| 1.041           | 1.068        | 0.961        | 0.979        | 0.954        | 0.900        | 0.976        | 1.020        | 0.939        | 1.046         | 1.057         | 1.008         | P56181       | NDUFV3    | NADH dehydrogenase [ubiquinone] flavoprotein 3, mitochondrial        |
| 1.026           | 0.999        | 1.005        | 1.010        | 0.962        | 0.954        | 1.014        | 1.054        | 0.982        | 1.029         | 0.994         | 1.009         | O75306       | NDUFS2    | NADH dehydrogenase [ubiquinone] iron-sulfur protein 2, mitochondrial |
| 1.042           | 0.997        | 1.002        | 1.007        | 0.967        | 0.983        | 1.009        | 1.019        | 1.000        | 1.025         | 0.992         | 1.008         | O75489       | NDUFS3    | NADH dehydrogenase [ubiquinone] iron-sulfur protein 3, mitochondrial |
| 0.998           | 0.990        | 0.969        | 0.981        | 0.974        | 1.009        | 1.027        | 0.996        | 0.996        | 1.098         | 1.025         | 1.061         | O43181       | NDUFS4    | NADH dehydrogenase [ubiquinone] iron-sulfur protein 4, mitochondrial |
| 1.055           | 0.841        | 0.966        | 1.010        | 0.920        | 1.010        | 1.058        | 1.005        | 1.009        | 1.084         | 0.754         | 1.049         | O43920       | NDUFS5    | NADH dehydrogenase [ubiquinone] iron-sulfur protein 5                |
| 1.011           | 0.989        | 1.010        | 0.981        | 1.267        | 0.983        | 1.064        | 0.861        | 0.999        | 1.071         | 0.991         | 1.009         | O75380       | NDUFS6    | NADH dehydrogenase [ubiquinone] iron-sulfur protein 6, mitochondrial |
| 0.985           | 1.007        | 0.975        | 1.034        | 0.965        | 1.025        | 1.021        | 0.998        | 1.001        | 0.969         | 0.981         | 0.946         | O75251       | NDUFS7    | NADH dehydrogenase [ubiquinone] iron-sulfur protein 7, mitochondrial |
| 1.016           | 1.035        | 0.973        | 0.970        | 1.018        | 1.022        | 1.007        | 0.993        | 0.985        | 1.013         | 1.012         | 0.983         | O00217       | NDUFS8    | NADH dehydrogenase [ubiquinone] iron-sulfur protein 8, mitochondrial |
| 0.999           | 1.032        | 1.033        | 1.011        | 1.033        | 1.017        | 1.032        | 1.047        | 1.016        | 1.030         | 1.004         | 1.046         | Q9UHQ9       | CYB5R1    | NADH-cytochrome b5 reductase 1                                       |
| 0.933           | 1.005        | 0.978        | 0.957        | 0.828        | 0.976        | 0.911        | 1.160        | 1.065        | 1.192         | 1.124         | 1.029         | P03886       | MT-ND1    | NADH-ubiquinone oxidoreductase chain 1                               |
| 0.892           | 0.904        | 0.934        | 0.948        | 0.708        | 1.032        | 0.994        | 1.009        | 0.910        | 1.167         | 1.196         | 1.051         | P03891       | MT-ND2    | NADH-ubiquinone oxidoreductase chain 2                               |
| 0.910           | 1.008        | 0.929        | 0.958        | 0.747        | 1.006        | 1.102        | 1.119        | 0.968        | 1.317         | 1.190         | 0.973         | P03905       | MT-ND4    | NADH-ubiquinone oxidoreductase chain 4                               |
| 0.885           | 0.979        | 0.956        | 0.851        | 0.786        | 1.028        | 1.003        | 1.193        | 1.109        | 1.221         | 1.102         | 0.919         | P03915       | MT-ND5    | NADH-ubiquinone oxidoreductase chain 5                               |
| 0.986           | 1.001        | 0.999        | 0.992        | 0.966        | 1.021        | 1.004        | 0.975        | 1.036        | 1.046         | 0.985         | 1.054         | P48163       | ME1       | NADP-dependent malic enzyme                                          |
| 1.018           | 1.004        | 1.004        | 0.991        | 0.936        | 0.974        | 1.003        | 1.021        | 1.001        | 1.068         | 0.977         | 1.044         | Q16798       | ME3       | NADP-dependent malic enzyme, mitochondrial                           |
| 0.891           | 0.974        | 1.094        | 1.075        | 0.960        | 1.044        |              |              |              | 1.011         | 1.033         | 1.099         | J3QQX3       | FDXR      | NADPH:adrenodoxin oxidoreductase, mitochondrial                      |
| 0.986           | 1.004        | 0.999        | 1.011        | 0.941        | 0.970        | 1.014        | 1.050        | 0.984        | 1.012         | 1.023         | 0.982         | P16435       | POR       | NADPH--cytochrome P450 reductase                                     |
| 1.026           | 0.995        | 0.948        | 1.001        | 0.988        | 1.018        | 1.034        | 1.019        | 1.000        | 1.052         | 1.057         | 1.013         | P41227       | NAA10     | N-alpha-acetyltransferase 10                                         |
|                 |              |              | 1.009        | 1.321        | 1.183        | 1.063        | 0.824        | 1.148        | 0.923         | 1.108         | 1.037         | Q9BXJ9       | NAA15     | N-alpha-acetyltransferase 15, NatA auxiliary subunit                 |



| Abundance Ratio |              |              |              |              |              |              |              |              |               |               |               | Accession ID | Gene name | Protein Description                                                        |
|-----------------|--------------|--------------|--------------|--------------|--------------|--------------|--------------|--------------|---------------|---------------|---------------|--------------|-----------|----------------------------------------------------------------------------|
| 1 d<br>M1/C1    | 1 d<br>M2/C2 | 1 d<br>M3/C3 | 4 d<br>M1/C1 | 4 d<br>M2/C2 | 4 d<br>M3/C3 | 7 d<br>M1/C1 | 7 d<br>M2/C2 | 7 d<br>M3/C3 | 10 d<br>M1/C1 | 10 d<br>M2/C2 | 10 d<br>M3/C3 |              |           |                                                                            |
| 1.000           | 1.008        | 1.012        | 1.021        | 1.030        | 1.015        | 1.003        | 1.007        | 1.019        | 0.986         | 1.032         | 1.005         | A0A0B4J1W3   | NAA15     | N-alpha-acetyltransferase 15, NatA auxiliary subunit                       |
| 1.024           | 0.980        | 1.075        | 1.010        | 1.039        | 1.024        | 1.045        | 1.010        | 1.012        | 0.958         | 0.985         | 1.046         | Q6N069       | NAA16     | N-alpha-acetyltransferase 16, NatA auxiliary subunit                       |
| 1.212           | 0.882        | 1.053        | 1.084        | 0.858        | 1.041        | 1.000        | 1.028        | 1.064        | 1.028         | 0.996         | 1.023         | P61599       | NAA20     | N-alpha-acetyltransferase 20                                               |
| 0.973           | 0.988        | 1.017        | 1.006        | 0.943        | 1.046        | 0.986        | 1.065        | 1.068        | 0.957         | 1.056         | 1.025         | Q14CX7       | NAA25     | N-alpha-acetyltransferase 25, NatB auxiliary subunit                       |
| 0.989           | 0.957        | 1.068        | 0.966        | 0.979        | 1.047        | 0.961        | 0.991        | 1.053        | 1.013         | 1.024         | 1.165         | Q147X3       | NAA30     | N-alpha-acetyltransferase 30                                               |
| 0.955           | 0.976        | 1.002        | 1.010        | 0.939        | 1.041        | 1.026        | 1.001        | 1.020        | 0.993         | 1.012         | 1.053         | Q5VZE5       | NAA35     | N-alpha-acetyltransferase 35, NatC auxiliary subunit                       |
| 0.983           | 1.007        | 0.986        | 0.976        | 0.943        | 0.967        | 0.943        | 1.054        | 1.081        | 0.940         | 0.908         | 1.034         | Q86UY6       | NAA40     | N-alpha-acetyltransferase 40                                               |
| 1.016           | 0.982        | 0.984        | 0.999        | 0.951        | 0.996        | 0.984        | 1.040        | 0.999        | 0.994         | 0.986         | 1.015         | E7EQ69       | NAA50     | N-alpha-acetyltransferase 50                                               |
| 1.012           | 0.990        | 1.017        | 1.012        | 0.955        | 1.002        | 0.994        | 1.054        | 1.041        | 1.009         | 0.963         | 1.007         | B1AKJ5       | NRDC      | Nardilysin                                                                 |
| 1.059           | 1.047        | 0.984        | 1.051        | 1.041        | 1.010        | 1.012        | 1.103        | 1.018        | 1.015         | 1.026         | 0.975         | E9PAV3       | NACA      | Nascent polypeptide-associated complex subunit alpha, muscle-specific form |
| 1.136           | 0.909        | 0.912        | 1.254        | 0.963        | 1.017        | 1.312        | 1.144        | 1.031        | 1.472         | 1.030         | 1.390         | Q9H009       | NACA2     | Nascent polypeptide-associated complex subunit alpha-2                     |
| 0.990           | 0.704        | 0.920        | 1.183        | 0.886        | 1.047        |              |              |              | 1.081         | 1.115         | 0.931         | Q68D85       | NCR3LG1   | Natural cytotoxicity triggering receptor 3 ligand 1                        |
| 1.096           | 1.025        | 1.071        | 0.862        | 0.865        | 1.048        | 1.046        | 1.058        | 1.041        | 1.092         | 0.939         | 0.903         | P15882       | CHN1      | N-chimaerin                                                                |
| 1.022           | 0.903        | 1.029        | 0.985        | 1.159        | 0.937        | 0.966        | 1.074        | 1.104        |               |               |               | Q9HCH0       | NCKAP5L   | Nck-associated protein 5-like                                              |
| 0.933           | 0.940        | 1.047        | 0.923        | 0.889        | 1.030        | 1.008        | 0.926        | 1.026        | 0.982         | 0.874         | 1.123         | Q9NZQ3       | NCKIPSD   | NCK-interacting protein with SH3 domain                                    |
| 1.013           | 1.060        | 0.871        | 1.106        | 0.965        | 0.873        | 1.112        | 1.197        | 0.916        | 1.204         | 1.056         | 1.113         | A0A087X1N7   | NEB       | Nebulin                                                                    |
|                 |              |              | 0.945        | 1.031        | 1.036        | 1.058        | 1.052        | 0.949        | 0.969         | 0.860         | 0.947         | Q15223       | NECTIN1   | Nectin-1                                                                   |
| 0.967           | 0.998        | 1.026        | 1.010        | 0.920        | 1.075        | 1.022        | 1.098        | 1.053        | 1.030         | 1.020         | 1.088         | Q92692       | NECTIN2   | Nectin-2                                                                   |
| 0.880           | 1.118        | 0.974        | 0.959        | 1.112        | 1.167        |              |              |              |               |               |               | Q9NQS3       | NECTIN3   | Nectin-3                                                                   |
| 0.966           | 0.991        | 0.949        | 0.972        | 0.952        | 1.011        | 1.041        | 1.032        | 1.032        | 1.051         | 1.005         | 1.104         | O75113       | N4BP1     | NEDD4-binding protein 1                                                    |
| 0.991           | 1.158        | 1.732        |              |              |              | 0.854        | 0.743        | 0.524        |               |               |               | Q86UW6       | N4BP2     | NEDD4-binding protein 2                                                    |
| 0.354           | 0.609        | 2.044        | 0.414        | 0.650        | 1.794        | 0.427        | 0.724        | 1.492        | 0.822         | 0.989         | 1.347         | Q5TBK1       | N4BP2L1   | NEDD4-binding protein 2-like 1                                             |
| 1.079           | 1.116        | 1.207        | 0.967        | 0.973        | 0.927        | 1.147        | 0.703        | 0.925        | 1.266         | 1.238         | 1.074         | D6R968       | N4BP2L2   | NEDD4-binding protein 2-like 2 (Fragment)                                  |
|                 |              |              | 1.092        | 0.876        | 1.151        |              |              |              | 0.975         | 0.937         | 0.950         | Q9H0M0       | WWP1      | NEDD4-like E3 ubiquitin-protein ligase WWP1                                |
| 0.997           | 1.032        | 1.031        | 1.097        | 0.959        | 1.061        | 0.993        | 1.132        | 1.076        | 0.952         | 0.968         | 1.108         | O00308       | WWP2      | NEDD4-like E3 ubiquitin-protein ligase WWP2                                |
| 0.953           | 0.983        | 0.975        | 0.956        | 0.950        | 1.049        | 0.946        | 0.906        | 1.008        | 1.042         | 0.984         | 1.054         | Q15843       | NEDD8     | NEDD8                                                                      |
| 1.031           | 0.991        | 1.016        | 1.010        | 0.963        | 0.986        | 0.993        | 1.014        | 1.044        | 1.009         | 0.955         | 1.040         | H3BM74       | NUB1      | NEDD8 ultimate buster 1                                                    |
| 1.032           | 0.996        | 1.006        | 1.017        | 1.024        | 0.996        | 0.995        | 1.012        | 1.004        | 0.958         | 0.990         | 0.993         | Q8TBC4       | UBA3      | NEDD8-activating enzyme E1 catalytic subunit                               |
| 1.014           | 1.011        | 1.006        | 1.001        | 1.005        | 0.969        | 0.993        | 1.036        | 1.003        | 0.956         | 0.985         | 0.960         | Q13564       | NAE1      | NEDD8-activating enzyme E1 regulatory subunit                              |
| 1.033           | 0.970        | 1.022        | 0.972        | 1.109        | 1.041        | 0.993        | 0.845        | 1.015        | 1.028         | 1.070         | 1.018         | P61081       | UBE2M     | NEDD8-conjugating enzyme Ubc12                                             |

| Abundance Ratio |              |              |              |              |              |              |              |              |               |               |               | Accession ID | Gene name | Protein Description                                 |
|-----------------|--------------|--------------|--------------|--------------|--------------|--------------|--------------|--------------|---------------|---------------|---------------|--------------|-----------|-----------------------------------------------------|
| 1 d<br>M1/C1    | 1 d<br>M2/C2 | 1 d<br>M3/C3 | 4 d<br>M1/C1 | 4 d<br>M2/C2 | 4 d<br>M3/C3 | 7 d<br>M1/C1 | 7 d<br>M2/C2 | 7 d<br>M3/C3 | 10 d<br>M1/C1 | 10 d<br>M2/C2 | 10 d<br>M3/C3 |              |           |                                                     |
| 1.025           | 0.963        | 1.015        | 0.966        | 0.965        | 1.015        | 1.021        | 1.018        | 0.983        | 1.010         | 0.983         | 1.047         | A0A0C4DFX9   | NELFA     | Negative elongation factor A                        |
| 1.005           | 0.984        | 1.034        | 0.975        | 0.939        | 1.056        | 0.984        | 0.970        | 1.017        | 1.039         | 1.011         | 1.042         | A0A0X1KG71   | NELFB     | Negative elongation factor B                        |
| 0.993           | 1.002        | 1.029        | 0.986        | 1.015        | 1.053        | 1.006        | 1.101        | 1.058        | 0.981         | 0.967         | 1.045         | H0UI80       | TH1L      | Negative elongation factor C/D                      |
| 0.997           | 0.968        | 1.008        | 0.973        | 0.961        | 1.030        | 0.990        | 0.978        | 1.010        | 1.043         | 1.030         | 1.040         | P18615       | NELFE     | Negative elongation factor E                        |
| 1.048           | 0.974        | 1.049        | 1.069        | 0.852        | 1.025        | 0.872        | 0.734        | 0.911        | 0.972         | 1.001         | 1.038         | A0A0U1RRE5   | NBDY      | Negative regulator of P-body association            |
| 1.196           | 0.808        | 0.893        |              |              |              |              |              |              |               |               |               | Q92859       | NEO1      | Neogenin                                            |
| 1.046           | 1.054        | 1.037        | 0.917        | 0.837        | 1.011        | 1.057        | 0.966        | 1.050        | 1.078         | 1.094         | 0.967         | Q7Z494       | NPHP3     | Nephrocystin-3                                      |
| 0.953           | 0.995        | 1.030        | 0.978        | 0.963        | 0.987        | 1.014        | 0.913        | 0.974        | 1.038         | 0.962         | 0.974         | Q6UXI9       | NPNT      | Nephronectin                                        |
| 1.068           | 1.046        | 1.020        | 1.109        | 1.384        | 0.952        |              |              |              |               |               |               | Q8NF91       | SYNE1     | Nesprin-1                                           |
| 1.153           | 1.183        | 1.076        | 1.016        | 0.963        | 1.037        | 0.933        | 1.094        | 1.109        | 0.940         | 1.035         | 1.210         | O95631       | NTN1      | Netrin-1                                            |
| 1.022           | 1.001        | 0.996        | 0.973        | 0.998        | 0.985        | 1.025        | 1.054        | 1.011        | 1.069         | 1.049         | 1.004         | Q9UMX5       | NENF      | Neudesin                                            |
| 0.898           | 1.016        | 0.971        | 0.956        | 0.846        | 0.992        | 0.975        | 0.951        | 1.050        | 0.943         | 0.956         | 1.101         | Q9NPE2       | NGRN      | Neugrin                                             |
| 0.993           | 0.946        | 1.074        | 0.999        | 0.961        | 1.045        | 1.025        | 1.004        | 0.995        | 1.050         | 1.017         | 1.044         | D3DTX6       | PPP1R9B   | Neurabin-2                                          |
| 0.985           | 0.983        | 1.033        | 1.010        | 1.005        | 0.999        | 1.025        | 0.984        | 1.058        | 1.031         | 1.013         | 1.104         | O00401       | WASL      | Neural Wiskott-Aldrich syndrome protein             |
|                 |              |              |              |              |              | 0.962        | 0.969        | 1.106        | 1.128         | 1.012         | 0.952         | Q96JN8       | NEURL4    | Neuralized-like protein 4                           |
| 1.026           | 1.021        | 1.086        | 1.019        | 0.932        | 1.026        | 1.035        | 1.200        | 1.052        | 0.928         | 0.991         | 1.012         | Q6ZS30       | NBEAL1    | Neurobeachin-like protein 1                         |
| 0.993           | 1.002        | 1.050        | 0.980        | 0.950        | 0.885        | 1.082        | 1.297        | 1.005        |               |               |               | Q6ZNJ1       | NBEAL2    | Neurobeachin-like protein 2                         |
| 0.906           | 0.986        | 0.965        | 0.958        | 0.943        | 0.962        | 0.984        | 1.003        | 0.970        | 0.971         | 0.957         | 0.975         | Q09666       | AHNAK     | Neuroblast differentiation-associated protein AHNAK |
| 1.011           | 1.016        | 1.049        | 1.005        | 0.972        | 1.004        | 0.996        | 1.015        | 0.981        | 1.015         | 0.995         | 1.031         | A2RRP1       | NBAS      | Neuroblastoma-amplified sequence                    |
| 0.809           | 1.002        | 1.054        | 1.314        | 0.885        | 0.959        |              |              |              |               |               |               | P29120       | PCSK1     | Neuroendocrine convertase 1                         |
| 1.000           | 1.001        | 1.022        | 1.002        | 0.972        | 1.042        | 0.998        | 1.099        | 1.067        | 0.990         | 0.997         | 1.024         | P21359       | NF1       | Neurofibromin                                       |
| 0.760           | 0.758        | 0.774        |              |              |              | 1.126        | 1.150        | 0.951        | 1.121         | 1.181         | 1.228         | P46531       | NOTCH1    | Neurogenic locus notch homolog protein 1            |
| 1.036           | 0.978        | 1.009        | 1.023        | 0.984        | 1.047        | 0.998        | 1.072        | 0.968        | 1.060         | 1.007         | 1.069         | Q04721       | NOTCH2    | Neurogenic locus notch homolog protein 2            |
| 0.953           | 0.934        | 0.935        | 0.881        | 1.010        | 0.967        | 1.028        | 0.826        | 0.913        | 1.117         | 0.860         | 1.061         | Q92686       | NRGN      | Neurogranin                                         |
| 1.004           | 1.014        | 1.030        | 0.993        | 0.982        | 1.040        | 1.042        | 1.038        | 0.974        | 1.005         | 1.012         | 1.047         | Q8NEJ9       | NGDN      | Neuroguidin                                         |
| 1.000           | 0.997        | 0.996        | 0.992        | 0.979        | 0.983        | 0.981        | 1.043        | 0.992        | 1.013         | 0.987         | 0.994         | Q9BYT8       | NLN       | Neurolysin, mitochondrial                           |
| 1.038           | 0.905        | 0.836        |              |              |              |              |              |              |               |               |               | Q8NEY1       | NAV1      | Neuron navigator 1                                  |
|                 |              |              |              |              |              | 1.148        | 0.779        | 0.978        | 1.048         | 1.082         | 1.068         | Q8IVL0       | NAV3      | Neuron navigator 3                                  |
| 0.987           | 0.937        | 1.324        | 1.008        | 0.953        | 1.205        | 1.000        | 1.044        | 1.400        | 1.013         | 1.039         | 1.341         | P62166       | NCS1      | Neuronal calcium sensor 1                           |
|                 |              |              |              |              |              |              |              |              | 1.215         | 1.270         | 1.011         | Q9UH03       |           | 3-Sep Neuronal-specific septin-3                    |
|                 |              |              |              |              |              |              |              |              | 1.031         | 1.815         | 0.929         | M0R2C2       | PNPLA6    | Neuropathy target esterase (Fragment)               |
| 0.838           | 0.984        | 0.948        | 0.943        | 0.862        | 0.946        | 1.008        | 0.974        | 0.927        | 1.015         | 0.929         | 1.019         | M0R2H4       | PNPLA6    | Neuropathy target esterase (Fragment)               |
| 1.090           | 0.956        | 1.030        | 1.151        | 0.892        | 1.017        | 1.253        | 0.943        | 0.914        | 1.321         | 0.950         | 1.172         | Q9Y639       | NPTN      | Neuroplastin                                        |

| Abundance Ratio |              |              |              |              |              |              |              |              |               |               |               | Accession ID | Gene name | Protein Description                                      |
|-----------------|--------------|--------------|--------------|--------------|--------------|--------------|--------------|--------------|---------------|---------------|---------------|--------------|-----------|----------------------------------------------------------|
| 1 d<br>M1/C1    | 1 d<br>M2/C2 | 1 d<br>M3/C3 | 4 d<br>M1/C1 | 4 d<br>M2/C2 | 4 d<br>M3/C3 | 7 d<br>M1/C1 | 7 d<br>M2/C2 | 7 d<br>M3/C3 | 10 d<br>M1/C1 | 10 d<br>M2/C2 | 10 d<br>M3/C3 |              |           |                                                          |
| 1.003           | 1.011        | 1.008        | 0.992        | 0.978        | 0.997        | 1.011        | 1.008        | 0.996        | 1.019         | 0.982         | 1.009         | Q14697       | GANAB     | Neutral alpha-glucosidase AB                             |
| 1.089           | 1.035        | 0.970        | 1.015        | 0.978        | 1.019        | 1.022        | 0.981        | 1.009        | 1.111         | 0.921         | 1.038         | Q8TET4       | GANC      | Neutral alpha-glucosidase C                              |
| 0.980           | 1.013        | 1.025        | 1.048        | 0.992        | 1.111        | 1.058        | 1.096        | 1.036        | 1.032         | 0.997         | 1.135         | Q15758       | SLC1A5    | Neutral amino acid transporter B(0)                      |
| 1.136           | 1.113        | 1.077        | 1.069        | 0.924        | 0.976        | 1.052        | 1.171        | 0.966        | 0.934         | 0.870         | 1.085         | X6R8F3       | LCN2      | Neutrophil gelatinase-associated lipocalin               |
|                 |              |              | 1.051        | 0.771        | 0.710        |              |              |              |               |               |               | Q0ZGT2       | NEXN      | Nexilin                                                  |
| 0.938           | 0.887        | 1.066        | 1.076        | 0.963        | 0.898        | 1.071        | 0.928        | 0.988        | 1.078         | 1.136         | 1.050         | Q14596       | NBR1      | Next to BRCA1 gene 1 protein                             |
| 0.998           | 0.980        | 0.990        | 0.982        | 0.933        | 0.994        | 1.009        | 1.167        | 1.039        | 0.958         | 0.908         | 1.006         | Q8NCF5       | NFATC2IP  | NFATC2-interacting protein                               |
| 1.205           | 1.162        | 1.157        | 1.044        | 1.074        | 0.847        | 0.891        | 0.959        | 1.061        | 0.924         | 1.233         | 0.777         | P25963       | NFKBIA    | NF-kappa-B inhibitor alpha                               |
| 0.999           | 0.989        | 1.084        | 0.994        | 0.995        | 0.977        | 0.822        | 0.743        | 1.027        | 1.001         | 1.028         | 1.102         | Q15653       | NFKBIB    | NF-kappa-B inhibitor beta                                |
| 2.330           | 0.623        | 0.790        | 0.940        | 0.975        | 0.922        | 0.944        | 1.019        | 1.132        | 0.933         | 1.149         | 1.073         | O00221       | NFKBIE    | NF-kappa-B inhibitor epsilon                             |
| 0.915           | 0.773        | 0.874        | 0.976        | 0.858        | 0.945        | 1.253        | 1.879        | 1.418        |               |               |               | G5E9P3       | NKIRAS1   | NF-kappa-B inhibitor-interacting Ras-like protein 1      |
| 1.100           | 1.009        | 1.053        | 1.000        | 1.009        | 1.005        | 0.995        | 1.093        | 1.010        | 0.972         | 1.024         | 1.042         | H7BXP1       | NKIRAS2   | NF-kappa-B inhibitor-interacting Ras-like protein 2      |
|                 |              |              |              |              |              | 0.933        | 1.037        | 1.429        |               |               |               | Q9UBC1       | NFKBIL1   | NF-kappa-B inhibitor-like protein 1                      |
| 0.967           | 0.900        | 1.020        | 0.930        | 1.014        | 1.174        | 1.218        | 0.955        | 1.022        | 1.286         | 0.947         | 1.231         | Q8N5F7       | NKAP      | NF-kappa-B-activating protein                            |
| 1.019           | 0.978        | 1.010        | 0.998        | 1.022        | 0.981        | 1.019        | 1.019        | 1.042        | 1.046         | 0.954         | 1.081         | Q9UMS0       | NFU1      | NFU1 iron-sulfur cluster scaffold homolog, mitochondrial |
| 0.909           | 1.003        | 1.015        | 0.947        | 0.957        | 1.027        | 1.003        | 0.860        | 0.979        | 1.076         | 1.008         | 1.056         | Q6ZNB6       | NFXL1     | NF-X1-type zinc finger protein NFXL1                     |
| 1.047           | 1.045        | 1.022        | 0.956        | 0.907        | 0.991        | 1.004        | 1.022        | 1.032        | 0.968         | 0.977         | 1.029         | Q9P2E3       | ZNFX1     | NFX1-type zinc finger-containing protein 1               |
| 1.126           | 1.052        | 0.987        | 0.985        | 0.891        | 0.913        | 0.940        | 1.107        | 1.064        | 0.955         | 0.996         | 1.008         | Q13506       | NAB1      | NGFI-A-binding protein 1                                 |
| 1.064           | 1.049        | 1.073        | 0.993        | 0.955        | 1.017        | 0.994        | 1.048        | 0.998        | 1.070         | 1.017         | 1.011         | Q15742       | NAB2      | NGFI-A-binding protein 2                                 |
| 1.014           | 0.996        | 0.985        | 1.044        | 0.961        | 1.001        | 0.993        | 1.089        | 1.000        | 0.999         | 1.024         | 0.985         | Q8NBF2       | NHLRC2    | NHL repeat-containing protein 2                          |
| 1.032           | 0.966        | 0.971        | 0.955        | 0.915        | 0.938        | 0.998        | 0.948        | 0.951        | 1.001         | 0.974         | 0.966         | Q5JS37       | NHLRC3    | NHL repeat-containing protein 3                          |
| 1.040           | 1.016        | 1.024        | 1.068        | 1.420        | 0.974        | 0.995        | 0.893        | 1.051        | 0.941         | 1.016         | 0.903         | B1AHD1       | SNU13     | NHP2-like protein 1                                      |
| 0.941           | 0.865        | 1.050        | 1.000        | 0.928        | 1.006        | 0.963        | 1.097        | 0.947        | 1.145         | 1.048         | 1.040         | HOYDF6       | NHSL1     | NHS-like protein 1 (Fragment)                            |
| 0.902           | 1.031        | 1.162        | 0.893        | 0.917        | 1.091        | 0.926        | 1.110        | 0.953        | 0.882         | 0.812         | 1.044         | Q5SYE7       | NHSL1     | NHS-like protein 1                                       |
| 0.970           | 0.989        | 1.004        | 1.044        | 1.011        | 1.056        | 1.000        | 1.056        | 1.002        | 1.012         | 1.010         | 0.995         | Q96TA1       | FAM129B   | Niban-like protein 1                                     |
| 1.022           | 1.003        | 1.010        | 1.006        | 0.967        | 0.996        | 1.015        | 1.054        | 0.985        | 1.005         | 1.011         | 1.021         | O60934       | NBN       | Nibrin                                                   |
| 0.990           | 0.986        | 1.016        | 0.995        | 0.945        | 0.999        | 0.993        | 1.014        | 0.976        | 1.012         | 1.003         | 0.985         | Q969V3       | NCLN      | Nicalin                                                  |
| 0.987           | 1.087        | 0.971        | 1.052        | 0.965        | 1.014        |              |              |              |               |               |               | Q5T205       | NCSTN     | Nicastrin (Fragment)                                     |
| 0.995           | 1.025        | 1.017        | 1.095        | 1.048        | 1.142        | 1.118        | 1.198        | 1.114        | 1.117         | 1.073         | 1.097         | Q92542       | NCSTN     | Nicastrin                                                |
| 1.044           | 1.005        | 0.989        | 1.067        | 1.261        | 0.996        | 1.104        | 0.963        | 1.098        | 1.032         | 1.037         | 0.985         | P40261       | NNMT      | Nicotinamide N-methyltransferase                         |
| 1.086           | 1.032        | 1.022        | 1.139        | 1.167        | 1.117        | 1.100        | 1.153        | 1.091        | 1.057         | 1.057         | 1.025         | P43490       | NAMPT     | Nicotinamide phosphoribosyltransferase                   |
| 1.214           | 1.111        | 1.018        | 0.961        | 0.961        | 0.956        | 1.014        | 1.125        | 1.082        | 0.952         | 1.093         | 0.901         | Q9NWW6       | NMRK1     | Nicotinamide riboside kinase 1                           |

| Abundance Ratio |              |              |              |              |              |              |              |              |               |               |               | Accession ID | Gene name | Protein Description                                              |
|-----------------|--------------|--------------|--------------|--------------|--------------|--------------|--------------|--------------|---------------|---------------|---------------|--------------|-----------|------------------------------------------------------------------|
| 1 d<br>M1/C1    | 1 d<br>M2/C2 | 1 d<br>M3/C3 | 4 d<br>M1/C1 | 4 d<br>M2/C2 | 4 d<br>M3/C3 | 7 d<br>M1/C1 | 7 d<br>M2/C2 | 7 d<br>M3/C3 | 10 d<br>M1/C1 | 10 d<br>M2/C2 | 10 d<br>M3/C3 |              |           |                                                                  |
| 1.060           | 1.003        | 0.985        | 1.003        | 1.038        | 0.997        | 1.067        | 1.030        | 1.040        | 1.051         | 0.988         | 1.073         | Q9HAN9       | NMNAT1    | Nicotinamide/nicotinic acid mononucleotide adenylyltransferase 1 |
| 1.018           | 1.023        | 1.011        | 1.001        | 1.010        | 1.002        | 1.003        | 1.018        | 1.020        | 1.049         | 0.987         | 1.032         | Q6XQN6       | NAPRT     | Nicotinate phosphoribosyltransferase                             |
| 0.913           | 1.011        | 1.028        | 1.034        | 1.071        | 1.022        | 1.053        | 0.964        | 0.995        | 1.084         | 0.933         | 1.103         | Q15274       | QPRT      | Nicotinate-nucleotide pyrophosphorylase [carboxylating]          |
| 1.116           | 1.119        | 1.070        | 1.071        | 0.996        | 1.058        | 1.094        | 1.053        | 1.053        | 1.102         | 1.328         | 1.090         | P14543       | NID1      | Nidogen-1                                                        |
| 0.952           | 0.994        | 0.964        | 0.999        | 0.864        | 1.073        | 1.118        | 0.993        | 1.021        | 1.107         | 1.099         | 1.033         | O15118       | NPC1      | Niemann-Pick C1 protein                                          |
| 1.022           | 0.988        | 1.017        | 0.986        | 1.011        | 1.013        | 0.986        | 1.040        | 1.010        | 0.994         | 0.978         | 1.003         | Q9GZT8       | NIF3L1    | NIF3-like protein 1                                              |
| 1.007           | 1.001        | 1.032        | 1.007        | 0.960        | 1.015        | 1.014        | 0.993        | 1.029        | 1.004         | 0.980         | 1.075         | Q6KC79       | NIPBL     | Nipped-B-like protein                                            |
| 1.070           | 1.028        | 1.023        | 0.997        | 0.955        | 1.092        | 1.037        | 1.084        | 1.019        | 1.015         | 0.992         | 1.013         | Q9Y2I1       | NISCH     | Nischarin                                                        |
| 1.038           | 1.019        | 1.028        | 0.988        | 0.946        | 0.967        | 1.026        | 1.057        | 1.014        | 0.997         | 0.966         | 1.012         | Q9Y314       | NOSIP     | Nitric oxide synthase-interacting protein                        |
| 0.995           | 0.961        | 1.035        | 0.963        | 0.863        | 0.984        | 0.923        | 0.891        | 0.987        | 0.957         | 0.886         | 1.000         | Q8NC60       | NOA1      | Nitric oxide-associated protein 1                                |
| 0.999           | 1.005        | 1.017        | 1.008        | 1.012        | 1.021        | 1.050        | 0.952        | 0.973        | 1.002         | 1.043         | 0.978         | Q86X76       | NIT1      | Nitrilase homolog 1                                              |
|                 |              |              | 0.955        | 0.863        | 1.013        |              |              |              | 0.968         | 0.979         | 1.025         | Q8WTW4       | NPRL2     | Nitrogen permease regulator 2-like protein                       |
| 0.898           | 1.088        | 0.921        | 0.907        | 0.948        | 1.090        | 1.063        | 0.998        | 1.034        | 1.091         | 1.041         | 1.079         | Q12980       | NPRL3     | Nitrogen permease regulator 3-like protein                       |
| 0.989           | 1.074        | 1.051        |              |              |              |              |              |              |               |               |               | Q9BZM4       | ULBP3     | NKG2D ligand 3                                                   |
| 1.022           | 0.973        | 1.095        | 1.107        | 0.903        | 0.995        | 1.563        | 0.844        | 0.901        | 0.961         | 0.906         | 1.105         | P30414       | NKTR      | NK-tumor recognition protein                                     |
| 0.989           | 0.988        | 1.105        | 0.973        | 0.912        | 1.130        | 1.044        | 1.103        | 1.065        | 1.092         | 1.006         | 1.182         | Q86UT6       | NLRX1     | NLR family member X1                                             |
|                 |              |              |              |              |              |              |              |              | 0.953         | 1.246         | 1.336         | Q8TBK2       | SETD6     | N-lysine methyltransferase SETD6                                 |
| 1.288           | 0.888        | 1.092        | 0.987        | 0.896        | 1.065        | 0.928        | 1.051        | 1.028        |               |               |               | Q9NRG4       | SMYD2     | N-lysine methyltransferase SMYD2                                 |
| 1.008           | 1.000        | 1.025        | 1.045        | 1.014        | 1.077        | 1.064        | 1.069        | 1.079        | 1.084         | 0.966         | 1.028         | Q9HBL8       | NMRAL1    | NmrA-like family domain-containing protein 1                     |
| 0.992           | 1.018        | 1.007        | 0.979        | 0.943        | 0.968        | 0.970        | 0.978        | 0.981        | 1.021         | 0.957         | 1.057         | Q13287       | NMI       | N-myc-interactor                                                 |
|                 |              |              | 0.908        | 0.818        | 0.783        |              |              |              | 1.267         | 0.810         | 1.007         | Q9UK39       | NOCT      | Nocturnin                                                        |
| 0.962           | 1.037        | 0.934        | 0.963        | 0.946        | 0.957        | 1.068        | 0.992        | 1.044        | 1.136         | 1.039         | 1.094         | A0A087X117   | NOMO1     | Nodal modulator 1                                                |
| 0.975           | 0.990        | 1.008        | 0.992        | 0.949        | 1.029        | 0.987        | 0.981        | 1.022        | 1.020         | 0.996         | 1.018         | Q5JPE7       | NOMO2     | Nodal modulator 2                                                |
| 1.225           | 1.163        | 0.993        | 1.083        | 1.092        | 0.828        |              |              |              | 0.959         | 0.945         | 0.855         | A0A0X1KG68   | PAPD7     | Non-canonical poly(A) RNA polymerase PAPD7                       |
| 1.001           | 0.871        | 0.898        | 0.643        | 0.797        | 1.034        | 0.899        | 0.518        | 0.699        | 1.327         | 0.900         | 0.723         | P05114       | HMG1      | Non-histone chromosomal protein HMG-14                           |
| 0.855           | 0.862        | 0.830        | 0.548        | 0.793        | 1.061        | 0.744        | 0.367        | 0.608        | 1.133         | 0.781         | 0.635         | P05204       | HMG2      | Non-histone chromosomal protein HMG-17                           |
| 0.984           | 1.015        | 1.009        | 1.000        | 0.988        | 0.999        | 1.011        | 1.019        | 0.994        | 1.002         | 1.001         | 1.031         | Q9H9Q4       | NHEJ1     | Non-homologous end-joining factor 1                              |
|                 |              |              |              |              |              | 1.019        | 0.768        | 1.003        | 1.052         | 1.046         | 1.060         | Q9HCG7       | GBA2      | Non-lysosomal glucosylceramidase                                 |
| 0.952           | 0.998        | 0.994        | 1.012        | 0.982        | 0.999        | 1.008        | 0.970        | 0.976        | 0.959         | 1.017         | 0.956         | Q15233       | NONO      | Non-POU domain-containing octamer-binding protein                |
| 1.148           | 1.051        | 1.016        | 0.914        | 0.781        | 1.064        |              |              |              |               |               |               | Q13470       | TNK1      | Non-receptor tyrosine-protein kinase TNK1                        |
| 1.018           | 1.042        | 1.094        | 1.044        | 0.754        | 0.924        | 0.949        | 1.233        | 0.842        | 1.056         | 0.890         | 1.100         | P29597       | TYK2      | Non-receptor tyrosine-protein kinase TYK2                        |
| 0.965           | 1.010        | 0.967        | 0.988        | 0.981        | 0.961        | 0.974        | 0.982        | 0.972        | 0.944         | 0.944         | 0.941         | P22307       | SCP2      | Non-specific lipid-transfer protein                              |

| Abundance Ratio |              |              |              |              |              |              |              |              |               |               |               | Accession ID | Gene name | Protein Description                                           |
|-----------------|--------------|--------------|--------------|--------------|--------------|--------------|--------------|--------------|---------------|---------------|---------------|--------------|-----------|---------------------------------------------------------------|
| 1 d<br>M1/C1    | 1 d<br>M2/C2 | 1 d<br>M3/C3 | 4 d<br>M1/C1 | 4 d<br>M2/C2 | 4 d<br>M3/C3 | 7 d<br>M1/C1 | 7 d<br>M2/C2 | 7 d<br>M3/C3 | 10 d<br>M1/C1 | 10 d<br>M2/C2 | 10 d<br>M3/C3 |              |           |                                                               |
| 1.059           | 0.997        | 1.089        | 0.993        | 0.963        | 1.054        | 1.029        | 0.907        | 0.998        | 0.982         | 1.099         | 1.109         | A0A0A0MT23   | MARK3     | Non-specific serine/threonine protein kinase                  |
| 0.949           | 0.931        | 0.955        | 0.956        | 0.944        | 1.053        | 0.951        | 1.055        | 1.030        | 0.986         | 0.992         | 1.058         | Q8WV22       | NSMCE1    | Non-structural maintenance of chromosomes element 1 homolog   |
| 1.053           | 0.979        | 1.066        | 0.997        | 0.960        | 1.008        | 1.015        | 0.995        | 0.989        | 1.023         | 0.971         | 1.074         | Q96MG7       | NSMCE3    | Non-structural maintenance of chromosomes element 3 homolog   |
| 1.053           | 1.039        | 1.083        | 0.948        | 0.853        | 1.088        | 0.957        | 1.092        | 1.008        | 1.029         | 0.930         | 1.026         | Q9NXX6       | NSMCE4A   | Non-structural maintenance of chromosomes element 4 homolog A |
| 1.021           | 1.046        | 1.036        | 1.023        | 0.914        | 1.043        | 1.019        | 1.052        | 1.004        | 0.985         | 0.970         | 1.058         | O60443       | DFNA5     | Non-syndromic hearing impairment protein 5                    |
| 1.115           | 0.999        | 1.022        | 0.965        | 0.988        | 0.924        | 0.944        | 1.015        | 0.935        | 0.943         | 0.939         | 0.944         | Q9C002       | NMES1     | Normal mucosa of esophagus-specific gene 1 protein            |
| 1.009           | 0.987        | 1.036        | 1.022        | 0.923        | 1.022        | 1.037        | 1.038        | 1.018        | 0.990         | 1.017         | 1.026         | Q9NVX2       | NLE1      | Notchless protein homolog 1                                   |
| 1.019           | 0.996        | 1.004        | 0.991        | 0.987        | 0.992        | 0.991        | 0.979        | 0.990        | 0.956         | 0.968         | 1.013         | Q9UNZ2       | NSFL1C    | NSFL1 cofactor p47                                            |
| 1.009           | 1.018        | 0.976        | 1.002        | 0.978        | 0.992        | 0.993        | 0.995        | 0.969        | 1.047         | 0.957         | 0.972         | P51688       | SGSH      | N-sulphoglucosamine sulphohydrolase                           |
| 1.239           | 1.189        | 1.112        |              |              |              |              |              |              | 1.132         | 0.958         | 1.071         | Q96P71       | NECAB3    | N-terminal EF-hand calcium-binding protein 3                  |
| 0.999           | 1.014        | 0.996        | 1.010        | 0.959        | 1.021        | 1.026        | 1.060        | 1.013        | 1.007         | 1.034         | 1.062         | Q96KG9       | SCYL1     | N-terminal kinase-like protein                                |
| 1.015           | 0.992        | 0.962        | 1.048        | 1.028        | 1.069        | 1.032        | 1.018        | 0.995        | 1.042         | 1.015         | 1.059         | Q9BV86       | NTMT1     | N-terminal Xaa-Pro-Lys N-methyltransferase 1                  |
| 1.068           | 0.989        | 1.013        | 0.933        | 1.094        | 1.013        | 1.089        | 0.707        | 1.207        | 1.074         | 1.055         | 1.202         | Q9UKK6       | NXT1      | NTF2-related export protein 1                                 |
|                 |              |              | 0.942        | 1.145        | 1.040        | 0.922        | 1.031        | 0.986        | 0.773         | 0.846         | 1.056         | Q9H093       | NUAK2     | NUAK family SNF1-like kinase 2                                |
| 1.103           | 0.989        | 1.035        | 0.980        | 0.896        | 1.041        | 0.922        | 0.979        | 0.948        | 0.884         | 0.967         | 0.837         | P23497       | SP100     | Nuclear autoantigen Sp-100                                    |
| 0.958           | 0.989        | 0.961        | 0.966        | 0.970        | 0.991        | 0.983        | 0.936        | 0.957        | 0.970         | 0.988         | 1.024         | P49321       | NASP      | Nuclear autoantigenic sperm protein                           |
| 1.008           | 0.983        | 1.040        | 0.964        | 0.961        | 1.036        | 1.008        | 1.011        | 1.025        | 0.985         | 1.014         | 0.973         | Q09161       | NCBP1     | Nuclear cap-binding protein subunit 1                         |
| 0.976           | 1.017        | 1.008        | 1.028        | 1.054        | 1.035        | 1.058        | 0.938        | 0.984        | 1.085         | 1.053         | 1.041         | P52298       | NCBP2     | Nuclear cap-binding protein subunit 2                         |
| 1.002           | 1.015        | 0.994        | 1.034        | 0.978        | 1.031        | 1.042        | 1.024        | 1.026        | 1.069         | 1.025         | 1.041         | Q53F19       | NCBP3     | Nuclear cap-binding protein subunit 3                         |
| 0.987           | 0.963        | 1.053        | 0.994        | 1.009        | 1.000        | 0.895        | 0.956        | 0.954        | 0.971         | 0.949         | 1.016         | Q9NXR1       | NDE1      | Nuclear distribution protein nudE homolog 1                   |
| 0.949           | 0.975        | 1.027        | 0.917        | 0.882        | 1.072        | 1.027        | 1.061        | 0.973        | 1.017         | 0.949         | 1.047         | O14524       | NEMP1     | Nuclear envelope integral membrane protein 1                  |
| 1.064           | 1.052        | 1.008        | 1.088        | 0.969        | 0.907        | 0.977        | 1.175        | 1.046        | 0.986         | 1.075         | 0.937         | Q96HA1       | POM121    | Nuclear envelope pore membrane protein POM 121                |
| 1.053           | 1.007        | 1.017        | 1.024        | 0.999        | 0.991        | 1.020        | 0.964        | 0.970        | 0.977         | 1.088         | 1.006         | A0A075B7F8   | POM121C   | Nuclear envelope pore membrane protein POM 121C               |
| 0.977           | 0.986        | 1.004        | 0.976        | 0.957        | 0.996        | 1.006        | 1.015        | 1.008        | 1.029         | 1.026         | 1.039         | O60524       | NEMF      | Nuclear export mediator factor NEMF                           |
| 1.015           | 1.001        | 0.977        | 0.999        | 0.925        | 0.986        | 0.980        | 1.023        | 1.048        | 1.069         | 1.055         | 1.054         | P08651       | NFIC      | Nuclear factor 1 C-type                                       |
| 1.035           | 1.049        | 0.984        | 0.973        | 0.964        | 0.940        | 0.986        | 1.063        | 0.990        | 0.984         | 0.938         | 0.908         | Q5VW26       | NFIB      | Nuclear factor 1                                              |
| 1.271           | 1.039        | 1.097        | 0.933        | 0.895        | 0.975        |              |              |              | 1.427         | 1.110         | 1.405         | Q14938       | NFIX      | Nuclear factor 1 X-type                                       |
|                 |              |              | 0.941        | 0.864        | 1.288        |              |              |              |               |               |               | Q16649       | NFIL3     | Nuclear factor interleukin-3-regulated protein                |
| 1.004           | 1.038        | 1.042        | 0.998        | 0.984        | 1.028        | 1.023        | 1.047        | 1.008        | 1.006         | 0.995         | 1.039         | Q00653       | NFKB2     | Nuclear factor NF-kappa-B p100 subunit                        |
| 1.042           | 1.076        | 1.036        | 0.877        | 0.920        | 1.080        | 1.021        | 1.120        | 1.060        | 0.972         | 1.105         | 1.030         | O95644       | NFATC1    | Nuclear factor of activated T-cells, cytoplasmic 1            |

| Abundance Ratio |              |              |              |              |              |              |              |              |               |               |               | Accession ID | Gene name | Protein Description                                        |
|-----------------|--------------|--------------|--------------|--------------|--------------|--------------|--------------|--------------|---------------|---------------|---------------|--------------|-----------|------------------------------------------------------------|
| 1 d<br>M1/C1    | 1 d<br>M2/C2 | 1 d<br>M3/C3 | 4 d<br>M1/C1 | 4 d<br>M2/C2 | 4 d<br>M3/C3 | 7 d<br>M1/C1 | 7 d<br>M2/C2 | 7 d<br>M3/C3 | 10 d<br>M1/C1 | 10 d<br>M2/C2 | 10 d<br>M3/C3 |              |           |                                                            |
| 1.019           | 1.010        | 1.025        |              |              |              | 0.967        | 1.069        | 0.826        | 1.858         | 0.345         | 0.953         | Q9UHK0       | NUFIP1    | Nuclear fragile X mental retardation-interacting protein 1 |
| 1.019           | 1.067        | 1.089        | 0.993        | 0.992        | 1.010        | 0.987        | 0.953        | 1.011        | 0.983         | 1.045         | 1.047         | Q7Z417       | NUFIP2    | Nuclear fragile X mental retardation-interacting protein 2 |
| 1.039           | 1.018        | 1.018        | 0.999        | 0.960        | 0.982        | 1.010        | 1.071        | 0.988        | 0.932         | 1.046         | 0.944         | Q12972       | PPP1R8    | Nuclear inhibitor of protein phosphatase 1                 |
| 0.966           | 0.999        | 0.992        | 0.988        | 0.966        | 0.981        | 0.980        | 0.973        | 0.961        | 0.973         | 0.989         | 0.990         | Q9Y266       | NUDC      | Nuclear migration protein nudC                             |
| 0.982           | 1.000        | 1.003        | 0.970        | 0.951        | 1.011        | 0.996        | 0.986        | 0.998        | 0.981         | 0.987         | 1.044         | Q14980       | NUMA1     | Nuclear mitotic apparatus protein 1                        |
| 1.104           | 0.997        | 1.025        | 0.976        | 0.946        | 1.101        | 1.020        | 1.070        | 1.066        | 0.988         | 0.995         | 1.047         | J3KPZ4       | C1D       | Nuclear nucleic acid-binding protein C1D                   |
| 1.002           | 0.999        | 1.024        | 0.985        | 0.949        | 1.019        | 0.974        | 1.042        | 1.006        | 0.935         | 0.999         | 0.971         | P57740       | NUP107    | Nuclear pore complex protein Nup107                        |
| 1.014           | 1.007        | 1.010        | 0.994        | 1.011        | 0.998        | 0.991        | 1.076        | 1.024        | 0.982         | 1.002         | 1.005         | Q8WUM0       | NUP133    | Nuclear pore complex protein Nup133                        |
| 1.008           | 1.001        | 0.995        | 1.015        | 0.985        | 1.023        | 1.014        | 1.053        | 1.000        | 0.977         | 0.976         | 0.986         | O75694       | NUP155    | Nuclear pore complex protein Nup155                        |
| 0.998           | 0.979        | 1.035        | 0.992        | 0.967        | 1.027        | 1.009        | 1.047        | 1.034        | 0.962         | 0.996         | 0.961         | Q12769       | NUP160    | Nuclear pore complex protein Nup160                        |
| 0.999           | 1.001        | 1.020        | 0.976        | 0.941        | 1.028        | 1.004        | 1.022        | 1.028        | 0.967         | 1.007         | 0.972         | Q92621       | NUP205    | Nuclear pore complex protein Nup205                        |
| 0.980           | 1.008        | 1.000        | 1.014        | 0.988        | 1.035        | 0.989        | 1.022        | 1.013        | 1.029         | 1.023         | 1.052         | P35658       | NUP214    | Nuclear pore complex protein Nup214                        |
| 0.999           | 1.002        | 1.015        | 1.015        | 0.968        | 0.968        | 1.017        | 1.054        | 0.988        | 0.984         | 1.003         | 1.000         | Q9UKX7       | NUP50     | Nuclear pore complex protein Nup50                         |
| 1.018           | 1.002        | 1.045        | 1.023        | 0.944        | 1.004        | 0.997        | 1.073        | 0.986        | 0.972         | 1.043         | 1.008         | Q9BW27       | NUP85     | Nuclear pore complex protein Nup85                         |
| 1.022           | 0.994        | 1.018        | 0.977        | 0.977        | 1.005        | 0.992        | 1.011        | 0.995        | 1.006         | 1.002         | 1.031         | Q99567       | NUP88     | Nuclear pore complex protein Nup88                         |
| 0.977           | 0.996        | 0.991        | 0.983        | 0.964        | 0.996        | 0.996        | 1.031        | 0.983        | 0.975         | 1.000         | 0.989         | Q8N1F7       | NUP93     | Nuclear pore complex protein Nup93                         |
| 1.003           | 1.016        | 0.977        | 1.002        | 0.988        | 1.005        | 1.013        | 1.036        | 0.996        | 1.009         | 1.011         | 1.001         | P52948       | NUP98     | Nuclear pore complex protein Nup98-Nup96                   |
| 1.031           | 0.999        | 1.030        | 0.962        | 0.962        | 1.045        | 0.982        | 1.045        | 1.014        | 0.959         | 1.002         | 1.054         | P37198       | NUP62     | Nuclear pore glycoprotein p62                              |
| 0.968           | 0.976        | 0.991        | 0.986        | 0.940        | 0.998        | 1.029        | 1.071        | 0.996        | 1.014         | 1.029         | 1.006         | Q8TEM1       | NUP210    | Nuclear pore membrane glycoprotein 210                     |
| 0.956           | 0.973        | 1.045        | 1.427        | 1.072        | 1.358        |              |              |              |               |               |               | A0A088AWN8   | NARF      | Nuclear prelamin A recognition factor                      |
| 1.082           | 1.051        | 1.108        | 1.025        | 1.319        | 1.076        | 1.033        | 0.963        | 0.914        |               |               |               | Q15596       | NCOA2     | Nuclear receptor coactivator 2                             |
| 0.954           | 0.973        | 1.031        | 0.953        | 1.022        | 1.051        | 1.009        | 0.997        | 1.004        | 0.973         | 0.977         | 1.127         | Q9Y6Q9       | NCOA3     | Nuclear receptor coactivator 3                             |
| 1.035           | 1.010        | 0.997        | 0.975        | 0.964        | 1.002        | 1.033        | 0.953        | 0.985        | 1.081         | 1.014         | 1.083         | Q9HCD5       | NCOA5     | Nuclear receptor coactivator 5                             |
| 1.103           | 1.059        | 0.999        | 0.986        | 0.948        | 1.015        | 0.981        | 1.016        | 1.079        |               |               |               | Q14686       | NCOA6     | Nuclear receptor coactivator 6                             |
| 1.015           | 0.986        | 1.000        | 0.999        | 0.918        | 1.007        | 1.019        | 0.965        | 1.005        | 1.042         | 1.000         | 1.087         | O75376       | NCOR1     | Nuclear receptor corepressor 1                             |
| 0.970           | 0.950        | 0.991        | 0.966        | 0.973        | 1.042        | 1.057        | 1.041        | 0.976        | 1.095         | 0.997         | 1.016         | Q9Y618       | NCOR2     | Nuclear receptor corepressor 2                             |
|                 |              |              |              |              |              |              |              |              | 1.097         | 1.025         | 1.562         | P13056       | NR2C1     | Nuclear receptor subfamily 2 group C member 1              |
|                 |              |              | 0.819        | 1.007        | 0.855        |              |              |              |               |               |               | P49116       | NR2C2     | Nuclear receptor subfamily 2 group C member 2              |
| 1.016           | 0.853        | 0.940        | 0.968        | 1.061        | 0.965        | 0.993        | 0.966        | 0.992        | 1.038         | 0.950         | 1.229         | P10588       | NR2F6     | Nuclear receptor subfamily 2 group F member 6              |
|                 |              |              | 0.919        | 0.886        | 0.979        | 1.104        | 1.148        | 1.015        | 0.935         | 1.058         | 1.222         | Q96F24       | NRBF2     | Nuclear receptor-binding factor 2                          |
| 1.058           | 1.058        | 1.028        | 0.998        | 0.995        | 1.050        | 0.968        | 1.073        | 1.063        | 0.990         | 0.998         | 1.018         | Q9NSY0       | NRBP2     | Nuclear receptor-binding protein 2                         |
| 0.977           | 0.983        | 0.974        | 0.970        | 0.961        | 0.982        | 0.969        | 1.067        | 1.096        | 0.999         | 0.973         | 1.041         | Q9UHY1       | NRBP1     | Nuclear receptor-binding protein                           |
| 1.010           | 1.005        | 0.991        | 0.980        | 0.955        | 0.994        | 0.966        | 1.033        | 0.984        | 0.991         | 0.981         | 1.032         | Q9UBU9       | NXF1      | Nuclear RNA export factor 1                                |

| Abundance Ratio |              |              |              |              |              |              |              |              |               |               |               | Accession ID | Gene name | Protein Description                                               |
|-----------------|--------------|--------------|--------------|--------------|--------------|--------------|--------------|--------------|---------------|---------------|---------------|--------------|-----------|-------------------------------------------------------------------|
| 1 d<br>M1/C1    | 1 d<br>M2/C2 | 1 d<br>M3/C3 | 4 d<br>M1/C1 | 4 d<br>M2/C2 | 4 d<br>M3/C3 | 7 d<br>M1/C1 | 7 d<br>M2/C2 | 7 d<br>M3/C3 | 10 d<br>M1/C1 | 10 d<br>M2/C2 | 10 d<br>M3/C3 |              |           |                                                                   |
| 1.032           | 1.010        | 1.018        | 1.014        | 1.014        | 1.047        | 1.008        | 0.967        | 0.942        | 1.017         | 1.003         | 1.098         | Q9H0G5       | NSRP1     | Nuclear speckle splicing regulatory protein 1                     |
|                 |              |              | 1.018        | 0.849        | 1.079        | 0.968        | 1.138        | 0.851        | 0.878         | 0.957         | 0.964         | P23511       | NFYA      | Nuclear transcription factor Y subunit alpha                      |
| 1.006           | 0.990        | 0.992        | 1.015        | 0.945        | 0.988        | 1.027        | 1.061        | 0.955        | 0.932         | 1.052         | 0.968         | P25208       | NFYB      | Nuclear transcription factor Y subunit beta                       |
| 0.988           | 1.011        | 1.031        | 0.988        | 0.943        | 1.026        | 1.022        | 1.027        | 1.028        | 0.975         | 0.974         | 0.978         | Q13952       | NFYC      | Nuclear transcription factor Y subunit gamma                      |
| 0.933           | 0.999        | 0.966        | 0.986        | 1.022        | 1.003        | 0.970        | 1.041        | 1.007        | 0.963         | 1.003         | 0.952         | P61970       | NUTF2     | Nuclear transport factor 2                                        |
| 0.986           | 0.881        | 0.916        | 0.730        | 0.968        | 1.036        | 0.876        | 0.598        | 0.835        | 1.144         | 0.900         | 0.825         | Q9H1E3       | NUCKS1    | Nuclear ubiquitous casein and cyclin-dependent kinase substrate 1 |
| 1.057           | 1.015        | 1.006        | 0.991        | 0.914        | 1.007        | 1.011        | 1.091        | 1.127        | 0.987         | 0.989         | 1.045         | O15381       | NVL       | Nuclear valosin-containing protein-like                           |
| 0.968           | 0.999        | 1.029        | 0.955        | 1.015        | 1.000        | 0.935        | 0.913        | 1.028        | 0.965         | 1.009         | 1.080         | Q86WB0       | ZC3HC1    | Nuclear-interacting partner of ALK                                |
| 0.936           | 0.970        | 0.936        | 0.936        | 0.942        | 0.959        | 1.038        | 0.914        | 0.996        | 1.024         | 1.020         | 1.043         | Q9Y2C4       | EXOG      | Nuclease EXOG, mitochondrial                                      |
| 1.055           | 1.047        | 0.994        | 1.005        | 0.972        | 0.948        | 1.026        | 0.981        | 0.963        | 1.027         | 1.090         | 1.083         | P67809       | YBX1      | Nuclease-sensitive element-binding protein 1                      |
| 1.029           | 1.054        | 1.012        | 1.024        | 0.955        | 1.027        | 1.075        | 0.983        | 1.029        | 1.008         | 0.988         | 1.219         | Q13686       | ALKBH1    | Nucleic acid dioxygenase ALKBH1                                   |
| 0.974           | 1.000        | 1.018        | 0.990        | 0.989        | 1.025        | 1.021        | 1.033        | 1.036        | 1.037         | 0.988         | 1.031         | A0A087WSV8   | NUCB2     | Nucleobindin 2, isoform CRA_b                                     |
| 0.963           | 0.967        | 0.988        | 1.000        | 0.981        | 0.992        | 0.961        | 0.906        | 0.978        | 1.024         | 1.029         | 0.992         | Q02818       | NUCB1     | Nucleobindin-1                                                    |
| 0.977           | 1.021        | 0.990        | 1.036        | 0.982        | 0.923        | 0.958        | 1.018        | 0.936        | 0.984         | 0.902         | 1.072         | Q9BXS6       | NUSAP1    | Nucleolar and spindle-associated protein 1                        |
| 0.988           | 0.985        | 1.012        | 0.966        | 0.980        | 1.024        | 1.004        | 0.914        | 0.992        | 0.998         | 1.035         | 1.038         | Q9Y3T9       | NOC2L     | Nucleolar complex protein 2 homolog                               |
| 0.979           | 0.981        | 0.988        | 0.988        | 0.954        | 1.004        | 0.978        | 0.974        | 0.992        | 1.006         | 1.035         | 1.018         | Q8WTT2       | NOC3L     | Nucleolar complex protein 3 homolog                               |
| 1.051           | 0.961        | 1.045        | 0.994        | 0.912        | 1.059        | 1.104        | 1.109        | 1.014        | 1.023         | 1.017         | 1.016         | Q9BVI4       | NOC4L     | Nucleolar complex protein 4 homolog                               |
| 0.987           | 0.993        | 0.989        | 1.002        | 0.972        | 1.040        | 1.019        | 1.041        | 1.029        | 1.012         | 1.026         | 1.030         | Q9BZE4       | GTPBP4    | Nucleolar GTP-binding protein 1                                   |
| 1.021           | 0.975        | 1.056        | 1.021        | 1.027        | 1.070        | 1.000        | 0.934        | 1.003        | 1.121         | 1.060         | 1.082         | Q13823       | GNL2      | Nucleolar GTP-binding protein 2                                   |
| 0.992           | 0.965        | 1.025        | 0.963        | 0.953        | 1.074        | 1.008        | 1.015        | 0.976        | 0.950         | 0.996         | 0.969         | Q5C9Z4       | NOM1      | Nucleolar MIF4G domain-containing protein 1                       |
| 1.013           | 0.988        | 1.021        | 0.973        | 0.956        | 1.047        | 0.994        | 1.082        | 1.070        | 1.034         | 1.021         | 1.044         | O60287       | URB1      | Nucleolar pre-ribosomal-associated protein 1                      |
| 1.053           | 1.000        | 1.021        | 1.023        | 0.950        | 1.019        | 0.976        | 1.031        | 1.020        | 0.999         | 0.986         | 0.927         | Q9BSC4       | NOL10     | Nucleolar protein 10                                              |
| 0.995           | 1.019        | 1.026        | 0.988        | 0.951        | 0.979        | 1.002        | 1.036        | 1.009        | 0.961         | 1.013         | 0.979         | Q9H8H0       | NOL11     | Nucleolar protein 11                                              |
| 0.965           | 0.945        | 0.893        | 1.286        | 0.997        | 1.141        | 1.031        | 1.059        | 1.188        | 1.170         | 1.044         | 1.032         | Q9UGY1       | NOL12     | Nucleolar protein 12                                              |
| 1.003           | 0.996        | 1.015        | 0.980        | 0.954        | 1.052        | 1.008        | 0.993        | 0.989        | 1.012         | 1.054         | 0.999         | P78316       | NOP14     | Nucleolar protein 14                                              |
| 1.007           | 0.992        | 0.983        | 1.030        | 0.977        | 1.035        | 1.014        | 1.044        | 1.020        | 1.026         | 1.062         | 0.990         | Q9Y3C1       | NOP16     | Nucleolar protein 16                                              |
| 0.995           | 0.994        | 0.994        | 1.011        | 0.987        | 1.015        | 1.009        | 1.039        | 1.013        | 1.010         | 1.019         | 1.000         | O00567       | NOP56     | Nucleolar protein 56                                              |
| 1.018           | 0.997        | 1.009        | 0.996        | 0.996        | 1.015        | 1.013        | 1.004        | 0.994        | 1.007         | 1.023         | 0.990         | Q9Y2X3       | NOP58     | Nucleolar protein 58                                              |
| 1.025           | 0.993        | 1.036        | 1.009        | 1.010        | 1.043        | 1.038        | 1.061        | 1.052        | 0.984         | 1.009         | 1.029         | Q9H6R4       | NOL6      | Nucleolar protein 6                                               |
| 1.003           | 1.015        | 1.006        | 0.963        | 0.962        | 0.984        | 0.971        | 1.005        | 0.985        | 1.009         | 1.043         | 1.012         | Q9UMY1       | NOL7      | Nucleolar protein 7                                               |
| 0.969           | 0.985        | 1.028        | 0.994        | 0.995        | 1.017        | 0.983        | 0.961        | 0.977        | 1.006         | 0.966         | 1.057         | Q76FK4       | NOL8      | Nucleolar protein 8                                               |
| 0.996           | 1.007        | 0.991        | 0.994        | 0.921        | 1.065        | 1.022        | 1.076        | 1.046        | 0.982         | 0.996         | 1.035         | Q86U38       | NOP9      | Nucleolar protein 9                                               |
| 1.043           | 1.035        | 1.001        | 0.959        | 0.944        | 0.964        | 1.096        | 0.980        | 1.019        | 0.945         | 0.887         | 1.066         | A0A087WXF8   | ZCCHC17   | Nucleolar protein of 40 kDa                                       |



| Abundance Ratio |              |              |              |              |              |              |              |              |               |               |               | Accession ID | Gene name | Protein Description                             |
|-----------------|--------------|--------------|--------------|--------------|--------------|--------------|--------------|--------------|---------------|---------------|---------------|--------------|-----------|-------------------------------------------------|
| 1 d<br>M1/C1    | 1 d<br>M2/C2 | 1 d<br>M3/C3 | 4 d<br>M1/C1 | 4 d<br>M2/C2 | 4 d<br>M3/C3 | 7 d<br>M1/C1 | 7 d<br>M2/C2 | 7 d<br>M3/C3 | 10 d<br>M1/C1 | 10 d<br>M2/C2 | 10 d<br>M3/C3 |              |           |                                                 |
| 0.985           | 1.003        | 0.986        | 1.012        | 1.003        | 1.024        | 1.031        | 1.039        | 1.018        | 1.000         | 1.046         | 1.018         | Q9NR30       | DDX21     | Nucleolar RNA helicase 2                        |
| 0.968           | 0.995        | 0.997        | 0.975        | 0.965        | 1.002        | 0.972        | 0.952        | 0.982        | 0.995         | 1.024         | 1.010         | P17480       | UBTF      | Nucleolar transcription factor 1                |
| 0.881           | 1.254        | 0.926        | 0.926        | 0.943        | 1.105        | 0.983        | 0.955        | 0.967        | 0.992         | 0.895         | 1.030         | E9PKP7       | UBTF      | Nucleolar transcription factor 1                |
| 1.052           | 0.977        | 0.988        | 0.971        | 0.983        | 1.006        | 0.959        | 0.924        | 0.977        | 0.950         | 1.013         | 0.901         | P19338       | NCL       | Nucleolin                                       |
| 1.030           | 1.009        | 1.081        | 1.089        | 0.945        | 1.012        | 1.034        | 1.147        | 0.944        | 1.101         | 1.109         | 1.176         | Q6NW34       | NEPRO     | Nucleolus and neural progenitor protein         |
| 1.040           | 1.016        | 0.959        | 0.966        | 1.053        | 1.022        | 0.987        | 0.926        | 0.995        | 1.001         | 1.027         | 1.026         | P31483       | TIA1      | Nucleolysin TIA-1 isoform p40                   |
| 0.964           | 0.961        | 0.999        | 0.944        | 0.952        | 1.007        | 0.926        | 0.871        | 0.959        | 0.950         | 1.040         | 0.929         | P06748       | NPM1      | Nucleophosmin                                   |
| 0.987           | 1.016        | 0.938        | 1.027        | 0.963        | 1.047        | 1.011        | 1.038        | 1.004        | 1.049         | 1.021         | 1.074         | O75607       | NPM3      | Nucleoplasmin-3                                 |
| 0.978           | 0.963        | 1.000        | 1.013        | 0.969        | 1.042        | 1.016        | 1.055        | 1.058        | 1.001         | 0.997         | 1.063         | Q53GS7       | GLE1      | Nucleoporin GLE1                                |
| 0.979           | 1.023        | 0.997        | 1.005        | 0.928        | 0.945        | 1.007        | 1.081        | 0.947        | 0.993         | 1.025         | 0.973         | Q9BTX1       | NDC1      | Nucleoporin NDC1                                |
| 1.017           | 0.997        | 1.015        | 0.992        | 0.956        | 1.032        | 1.037        | 1.061        | 1.035        | 1.004         | 1.004         | 1.001         | Q5SRE5       | NUP188    | Nucleoporin NUP188 homolog                      |
| 1.009           | 0.968        | 1.035        | 0.998        | 1.038        | 1.030        | 0.985        | 1.037        | 1.042        | 0.952         | 0.959         | 0.986         | Q8NFB4       | NUP37     | Nucleoporin Nup37                               |
| 0.966           | 0.996        | 0.980        | 0.957        | 0.929        | 1.021        | 0.942        | 1.096        | 1.028        | 0.938         | 0.981         | 0.964         | Q8NFB3       | NUP43     | Nucleoporin Nup43                               |
| 1.000           | 1.017        | 0.991        | 0.996        | 0.950        | 0.956        | 0.976        | 0.998        | 0.953        | 0.959         | 1.039         | 0.945         | Q8NFB5       | NUP35     | Nucleoporin NUP53                               |
| 0.986           | 0.997        | 1.013        | 0.969        | 0.983        | 1.008        | 0.950        | 0.972        | 0.989        | 0.968         | 1.002         | 1.012         | Q7Z3B4       | NUP54     | Nucleoporin p54                                 |
| 0.999           | 0.985        | 1.023        | 0.945        | 0.955        | 1.026        | 0.921        | 0.854        | 1.012        | 1.008         | 1.016         | 1.013         | Q9BVL2       | NUP58     | Nucleoporin p58/p45                             |
| 1.005           | 0.996        | 0.961        | 1.007        | 0.944        | 1.034        | 1.045        | 1.053        | 1.040        | 0.980         | 1.001         | 1.064         | O15504       | NUPL2     | Nucleoporin-like protein 2                      |
| 0.983           | 0.992        | 1.013        | 0.989        | 0.977        | 1.011        | 0.975        | 0.981        | 0.984        | 0.993         | 1.006         | 1.017         | P12270       | TPR       | Nucleoprotein TPR                               |
| 0.989           | 0.986        | 0.985        | 1.035        | 0.964        | 1.012        | 1.014        | 1.092        | 1.021        | 1.001         | 1.025         | 1.048         | Q6DKJ4       | NXN       | Nucleoredoxin                                   |
| 0.987           | 0.982        | 1.010        | 1.000        | 0.935        | 1.051        | 1.009        | 1.047        | 1.053        | 1.066         | 1.031         | 1.102         | Q13232       | NME3      | Nucleoside diphosphate kinase 3                 |
| 1.053           | 1.051        | 1.037        | 1.037        | 0.997        | 1.040        | 1.029        | 1.141        | 1.031        | 1.074         | 1.016         | 1.124         | Q9Y5B8       | NME7      | Nucleoside diphosphate kinase 7                 |
| 1.016           | 1.017        | 0.989        | 1.009        | 1.022        | 0.991        | 0.992        | 1.071        | 1.003        | 0.990         | 1.016         | 0.974         | Q32Q12       | NME1-NME2 | Nucleoside diphosphate kinase                   |
| 0.950           | 0.913        | 0.913        | 0.873        | 0.890        | 0.883        | 0.926        | 0.872        | 0.863        | 0.895         | 0.887         | 0.886         | F2Z2X0       | NME4      | Nucleoside diphosphate kinase                   |
| 0.932           | 1.027        | 1.052        | 1.002        | 0.897        | 1.060        | 1.009        | 1.074        | 1.062        | 1.037         | 1.046         | 1.062         | A0A0C4DG91   | NME6      | Nucleoside diphosphate kinase                   |
| 1.088           | 0.942        | 1.052        | 1.000        | 0.972        | 1.010        | 1.024        | 1.038        | 1.034        | 1.001         | 0.958         | 1.021         | A8MXV4       | NUDT19    | Nucleoside diphosphate-linked moiety X motif 19 |
|                 |              |              |              |              |              | 0.980        | 1.107        | 0.893        |               |               |               | Q9BRQ3       | NUDT22    | Nucleoside diphosphate-linked moiety X motif 22 |
|                 |              |              | 1.024        | 0.988        | 1.021        | 1.022        | 1.031        | 0.936        | 0.931         | 1.018         | 1.092         | Q8WV74       | NUDT8     | Nucleoside diphosphate-linked moiety X motif 8  |
| 0.991           | 0.999        | 0.980        | 0.969        | 1.015        | 0.958        | 1.005        | 1.071        | 1.031        | 0.957         | 0.993         | 0.977         | P55209       | NAP1L1    | Nucleosome assembly protein 1-like 1            |
| 0.674           | 1.131        | 1.138        | 0.917        | 0.719        | 0.874        | 0.994        | 0.882        | 1.165        | 0.777         | 1.193         | 1.043         | F8VV59       | NAP1L1    | Nucleosome assembly protein 1-like 1            |
| 0.981           | 1.006        | 1.026        | 0.992        | 0.974        | 0.988        | 0.957        | 0.999        | 1.006        | 1.002         | 1.015         | 1.023         | Q12830       | BPTF      | Nucleosome-remodeling factor subunit BPTF       |
| 0.911           | 0.971        | 0.973        | 1.079        | 1.064        | 1.038        | 1.004        | 1.073        | 1.042        | 0.963         | 0.949         | 1.003         | Q9H173       | SIL1      | Nucleotide exchange factor SIL1                 |
| 1.010           | 1.075        | 1.079        | 1.091        | 0.908        | 1.025        | 1.090        | 1.058        | 1.059        | 1.029         | 1.006         | 1.024         | Q9NV35       | NUDT15    | Nucleotide triphosphate diphosphatase NUDT15    |
| 0.964           | 0.996        | 1.045        | 0.928        | 0.965        | 1.107        | 1.083        | 0.980        | 1.018        | 1.011         | 0.993         | 1.155         | Q96RE7       | NACC1     | Nucleus accumbens-associated protein 1          |
| 0.989           | 1.033        | 1.029        | 0.911        | 0.968        | 1.149        | 1.033        | 1.064        | 0.960        | 1.007         | 1.382         | 0.937         | Q96BF6       | NACC2     | Nucleus accumbens-associated protein 2          |

| Abundance Ratio |              |              |              |              |              |              |              |              |               |               |               | Accession ID | Gene name | Protein Description                           |
|-----------------|--------------|--------------|--------------|--------------|--------------|--------------|--------------|--------------|---------------|---------------|---------------|--------------|-----------|-----------------------------------------------|
| 1 d<br>M1/C1    | 1 d<br>M2/C2 | 1 d<br>M3/C3 | 4 d<br>M1/C1 | 4 d<br>M2/C2 | 4 d<br>M3/C3 | 7 d<br>M1/C1 | 7 d<br>M2/C2 | 7 d<br>M3/C3 | 10 d<br>M1/C1 | 10 d<br>M2/C2 | 10 d<br>M3/C3 |              |           |                                               |
| 0.981           | 0.974        | 0.993        | 0.986        | 0.960        | 1.004        | 0.967        | 0.962        | 1.023        | 0.963         | 0.965         | 1.016         | Q96RS6       | NUDCD1    | NudC domain-containing protein 1              |
| 1.063           | 1.001        | 0.993        | 0.984        | 1.020        | 0.981        | 0.992        | 0.928        | 0.978        | 1.053         | 0.993         | 1.060         | Q8WVJ2       | NUDCD2    | NudC domain-containing protein 2              |
| 0.981           | 1.000        | 1.046        | 1.034        | 1.154        | 1.015        | 0.968        | 1.006        | 1.018        | 1.049         | 1.029         | 1.001         | Q8IVD9       | NUDCD3    | NudC domain-containing protein 3              |
| 0.994           | 1.024        | 1.045        | 0.982        | 1.020        | 0.997        | 0.995        | 0.971        | 1.013        | 1.013         | 1.069         | 1.137         | Q9Y6R0       | NUMBL     | Numb-like protein                             |
| 1.021           | 0.989        | 0.926        | 1.023        | 0.991        | 0.980        | 1.067        | 1.103        | 0.983        | 0.920         | 0.946         | 0.960         | Q8IXM6       | NRM       | Nurim                                         |
| 1.008           | 1.035        | 0.992        | 0.986        | 0.979        | 0.978        | 0.952        | 1.157        | 1.020        | 0.996         | 0.988         | 1.000         | Q9Y530       | OARD1     | O-acetyl-ADP-ribose deacetylase 1             |
| 1.013           | 0.980        | 0.994        | 0.967        | 1.007        | 0.985        | 1.025        | 0.936        | 1.011        | 1.060         | 0.987         | 1.016         | Q9BQ69       | MACROD1   | O-acetyl-ADP-ribose deacetylase MACROD1       |
| 1.054           | 0.968        | 1.083        | 0.861        | 0.894        | 0.990        | 0.980        | 1.144        | 0.902        | 1.188         | 0.990         | 0.861         | A1Z1Q3       | MACROD2   | O-acetyl-ADP-ribose deacetylase MACROD2       |
| 0.969           | 0.995        | 0.969        | 0.999        | 1.033        | 0.988        | 0.988        | 1.025        | 1.028        | 1.000         | 0.993         | 0.996         | J3KQ32       | OLA1      | Obg-like ATPase 1                             |
| 0.952           | 0.919        | 0.974        |              |              |              |              |              |              |               |               |               | O75147       | OBSL1     | Obscurin-like protein 1                       |
| 1.045           | 1.013        | 1.025        | 1.107        | 0.966        | 0.969        | 1.123        | 0.893        | 1.071        | 1.119         | 0.945         | 1.141         | A0A0G2JMZ8   | OCLN      | Occludin                                      |
|                 |              |              | 0.901        | 0.910        | 0.880        | 1.137        | 1.174        | 0.920        | 1.052         | 0.944         | 1.097         | D6RDK6       | OCIAD1    | OCIA domain-containing protein 1 (Fragment)   |
| 1.023           | 0.991        | 1.026        | 0.998        | 0.970        | 0.960        | 1.058        | 1.021        | 0.975        | 1.049         | 1.003         | 1.076         | Q9NX40       | OCIAD1    | OCIA domain-containing protein 1              |
| 1.082           | 0.991        | 1.026        | 0.998        | 1.018        | 0.986        | 1.017        | 0.847        | 0.983        | 1.077         | 0.894         | 1.077         | Q56VL3       | OCIAD2    | OCIA domain-containing protein 2              |
| 0.889           | 1.056        | 0.942        | 1.157        | 1.136        | 1.127        | 1.071        | 1.152        | 1.073        | 0.928         | 1.013         | 0.955         | Q8NGA1       | OR1M1     | Olfactory receptor 1M1                        |
|                 |              |              | 1.186        | 0.802        | 0.967        |              |              |              |               |               |               | Q8NGY6       | OR6N2     | Olfactory receptor 6N2                        |
| 0.982           | 1.032        | 1.057        | 0.958        | 1.039        | 1.018        | 1.015        | 1.050        | 1.046        | 0.951         | 1.016         | 1.104         | O60890       | OPHN1     | Oligophrenin-1                                |
| 1.037           | 0.926        | 1.000        | 1.098        | 0.860        | 0.984        |              |              |              |               |               |               | F5GYG5       | REXO2     | Oligoribonuclease, mitochondrial              |
| 1.004           | 0.975        | 0.960        | 1.004        | 0.968        | 1.014        | 0.991        | 1.025        | 0.981        | 1.022         | 1.009         | 0.989         | Q9Y3B8       | REXO2     | Oligoribonuclease, mitochondrial              |
| 1.001           | 1.010        | 0.990        | 0.996        | 1.047        | 0.999        | 0.998        | 1.038        | 1.010        | 1.010         | 1.007         | 1.022         | Q9NQR4       | NIT2      | Omega-amidase NIT2                            |
| 1.021           | 1.082        | 1.016        | 1.070        | 0.983        | 0.941        | 1.036        | 1.198        | 1.039        | 1.079         | 0.922         | 1.112         | Q99650       | OSMR      | Oncostatin-M-specific receptor subunit beta   |
| 1.019           | 1.013        | 1.148        | 1.060        | 0.965        | 1.098        | 0.938        | 1.037        | 0.959        | 1.012         | 1.003         | 1.038         | Q9HD40       | SEPSECS   | O-phosphoseryl-tRNA(Sec) selenium transferase |
| 1.010           | 1.011        | 1.032        | 0.980        | 0.950        | 0.997        | 0.985        | 0.958        | 1.009        | 0.966         | 0.982         | 1.025         | Q9NZT2       | OGFR      | Opioid growth factor receptor                 |
| 1.024           | 0.995        | 1.013        | 1.021        | 0.942        | 1.036        | 1.080        | 1.145        | 1.038        | 1.082         | 1.008         | 1.068         | Q5TC84       | OGFRL1    | Opioid growth factor receptor-like protein 1  |
| 1.005           | 0.954        | 1.005        | 1.012        | 1.063        | 1.075        | 1.026        | 0.825        | 1.100        | 1.037         | 0.990         | 1.012         | Q9H6K4       | OPA3      | Optic atrophy 3 protein                       |
| 1.006           | 1.005        | 1.028        | 1.016        | 1.029        | 1.035        | 1.014        | 0.960        | 1.011        | 1.082         | 1.040         | 1.037         | Q96CV9       | OPTN      | Optineurin                                    |
|                 |              |              |              |              |              |              |              |              | 0.949         | 0.895         | 0.991         | O75665       | OFD1      | Oral-facial-digital syndrome 1 protein        |
| 1.008           | 1.036        | 1.136        |              |              |              | 0.983        | 1.165        | 1.044        | 0.858         | 0.882         | 1.052         | Q13415       | ORC1      | Origin recognition complex subunit 1          |
| 1.021           | 0.994        | 0.977        | 1.022        | 0.951        | 0.986        | 1.057        | 1.059        | 0.989        | 1.037         | 1.039         | 1.063         | Q13416       | ORC2      | Origin recognition complex subunit 2          |
| 0.981           | 0.986        | 1.025        | 1.030        | 0.946        | 1.027        | 1.013        | 1.044        | 1.008        | 0.938         | 0.945         | 0.986         | Q9UBD5       | ORC3      | Origin recognition complex subunit 3          |
| 0.976           | 1.007        | 1.013        | 0.971        | 0.987        | 1.068        | 1.047        | 1.057        | 1.026        | 1.017         | 0.977         | 1.047         | O43929       | ORC4      | Origin recognition complex subunit 4          |
| 1.029           | 1.007        | 1.007        | 1.036        | 0.920        | 1.126        | 1.049        | 1.100        | 1.000        | 0.979         | 1.057         | 0.994         | O43913       | ORC5      | Origin recognition complex subunit 5          |
| 0.897           | 0.892        | 1.150        | 1.182        | 1.049        | 1.063        | 1.171        | 1.150        | 1.249        |               |               |               | Q9Y5N6       | ORC6      | Origin recognition complex subunit 6          |
| 0.915           | 0.918        | 1.068        | 1.024        | 0.968        | 1.082        | 1.036        | 1.041        | 0.984        | 1.004         | 1.054         | 1.171         | Q8N138       | ORMDL3    | ORM1-like protein 3                           |

| Abundance Ratio |              |              |              |              |              |              |              |              |               |               |               | Accession ID | Gene name | Protein Description                                            |
|-----------------|--------------|--------------|--------------|--------------|--------------|--------------|--------------|--------------|---------------|---------------|---------------|--------------|-----------|----------------------------------------------------------------|
| 1 d<br>M1/C1    | 1 d<br>M2/C2 | 1 d<br>M3/C3 | 4 d<br>M1/C1 | 4 d<br>M2/C2 | 4 d<br>M3/C3 | 7 d<br>M1/C1 | 7 d<br>M2/C2 | 7 d<br>M3/C3 | 10 d<br>M1/C1 | 10 d<br>M2/C2 | 10 d<br>M3/C3 |              |           |                                                                |
| 0.987           | 0.994        | 0.971        | 0.980        | 0.945        | 0.954        | 0.971        | 1.037        | 0.970        | 0.951         | 0.906         | 0.955         | P04181       | OAT       | Ornithine aminotransferase, mitochondrial                      |
|                 |              |              | 0.940        | 0.853        | 1.052        | 1.201        | 1.119        | 1.081        | 1.021         | 0.939         | 1.278         | P00480       | OTC       | Ornithine carbamoyltransferase, mitochondrial                  |
| 1.011           | 1.020        | 1.009        | 0.968        | 0.977        | 0.990        | 0.917        | 0.970        | 1.003        | 0.959         | 0.990         | 1.001         | Q92882       | OSTF1     | Osteoclast-stimulating factor 1                                |
| 0.926           | 1.010        | 0.835        | 1.022        | 0.936        | 0.990        | 1.009        | 1.171        | 1.022        | 0.923         | 1.059         | 0.856         | Q86WC4       | OSTM1     | Osteopetrosis-associated transmembrane protein 1               |
| 1.024           | 1.021        | 1.037        | 1.034        | 0.935        | 1.043        | 0.992        | 1.053        | 1.031        | 0.992         | 0.983         | 0.983         | A0A087X0W9   | OTUD6B    | OTU domain containing 6B, isoform CRA_b                        |
| 0.997           | 1.021        | 1.070        | 0.994        | 0.961        | 0.998        | 1.018        | 1.019        | 1.089        | 1.013         | 0.984         | 1.071         | Q01804       | OTUD4     | OTU domain-containing protein 4                                |
| 0.866           | 1.122        | 1.206        | 0.970        | 0.853        | 1.088        | 1.071        | 0.965        | 1.053        | 1.048         | 1.125         | 1.049         | Q96G74       | OTUD5     | OTU domain-containing protein 5                                |
| 0.969           | 1.011        | 0.993        | 1.051        | 0.930        | 1.063        | 1.011        | 0.989        | 0.930        | 1.015         | 1.008         | 1.093         | Q6GQQ9       | OTUD7B    | OTU domain-containing protein 7B                               |
| 1.066           | 1.015        | 1.057        | 1.049        | 1.127        | 1.033        | 0.937        | 0.916        | 1.088        | 0.945         | 1.030         | 1.172         | Q5BJF6       | ODF2      | Outer dense fiber protein 2                                    |
| 1.029           | 0.971        | 0.992        | 1.033        | 0.984        | 0.989        | 1.060        | 0.985        | 0.987        | 1.013         | 1.045         | 0.954         | Q8N573       | OXR1      | Oxidation resistance protein 1                                 |
|                 |              |              |              |              |              | 0.944        | 1.092        | 1.173        |               |               |               | Q9UJX0       | OSGIN1    | Oxidative stress-induced growth inhibitor 1                    |
| 0.855           | 0.842        | 1.134        | 1.144        | 0.980        | 1.073        | 1.004        | 1.178        | 1.077        | 1.017         | 0.971         | 1.131         | C9JLB7       | OXNAD1    | Oxidoreductase NAD-binding domain-containing protein 1         |
| 0.905           | 0.951        | 1.080        | 1.152        | 1.052        | 1.220        | 1.061        | 0.980        | 1.137        | 1.134         | 1.089         | 1.136         | Q5BKU9       | OXLD1     | Oxidoreductase-like domain-containing protein 1                |
| 1.003           | 1.003        | 0.989        | 0.986        | 0.968        | 0.987        | 1.024        | 1.019        | 1.005        | 1.032         | 0.981         | 1.030         | P36551       | CPOX      | Oxygen-dependent coproporphyrinogen-III oxidase, mitochondrial |
| 1.009           | 1.005        | 1.017        | 1.034        | 1.032        | 1.008        | 1.003        | 1.020        | 1.006        | 1.006         | 0.982         | 1.025         | P22059       | OSBP      | Oxysterol-binding protein 1                                    |
|                 |              |              | 1.021        | 1.018        | 1.077        |              |              |              |               |               |               | Q969R2       | OSBP2     | Oxysterol-binding protein 2                                    |
| 0.990           | 1.017        | 0.981        | 0.962        | 0.946        | 0.962        | 0.901        | 0.982        | 1.235        | 0.855         | 0.984         | 0.872         | Q9BXW6       | OSBPL1A   | Oxysterol-binding protein-related protein 1                    |
| 0.996           | 1.016        | 1.026        | 0.993        | 0.977        | 1.008        | 0.976        | 1.031        | 1.020        | 1.003         | 0.941         | 1.027         | Q9BXB5       | OSBPL10   | Oxysterol-binding protein-related protein 10                   |
| 1.105           | 1.045        | 1.024        | 1.057        | 1.027        | 0.886        | 1.054        | 1.043        | 0.786        | 0.999         | 1.003         | 1.051         | Q9BXB4       | OSBPL11   | Oxysterol-binding protein-related protein 11                   |
| 1.024           | 0.999        | 1.035        | 0.996        | 0.946        | 0.999        | 0.985        | 1.029        | 1.035        | 0.984         | 0.955         | 1.050         | Q9H1P3       | OSBPL2    | Oxysterol-binding protein-related protein 2                    |
| 1.003           | 0.998        | 1.000        | 0.955        | 0.993        | 1.041        | 1.015        | 0.996        | 1.019        | 0.975         | 0.969         | 1.087         | Q9H4L5       | OSBPL3    | Oxysterol-binding protein-related protein 3                    |
| 1.122           | 1.009        | 1.120        | 0.980        | 0.983        | 1.038        |              |              |              | 1.253         | 0.938         | 0.957         | Q9H0X9       | OSBPL5    | Oxysterol-binding protein-related protein 5                    |
|                 |              |              |              |              |              | 0.973        | 1.253        | 0.942        |               |               |               | Q9BZF2       | OSBPL7    | Oxysterol-binding protein-related protein 7                    |
| 0.983           | 1.017        | 1.015        | 1.000        | 0.941        | 0.996        | 1.008        | 1.058        | 1.024        | 0.984         | 1.009         | 0.962         | Q9BZF1       | OSBPL8    | Oxysterol-binding protein-related protein 8                    |
| 1.005           | 1.023        | 1.031        | 0.967        | 0.999        | 1.047        | 0.986        | 1.053        | 1.027        | 1.009         | 0.995         | 1.004         | Q96SU4       | OSBPL9    | Oxysterol-binding protein-related protein 9                    |
| 0.942           | 1.021        | 1.217        | 0.928        | 0.893        | 1.212        | 0.929        | 1.064        | 0.951        |               |               |               | E9PLL4       | NR1H3     | Oxysterols receptor LXR-alpha                                  |
| 1.028           | 0.995        | 0.980        | 1.018        | 0.923        | 0.979        | 1.008        | 1.046        | 0.985        | 0.996         | 1.030         | 0.990         | Q9NWT1       | PAK1IP1   | p21-activated protein kinase-interacting protein 1             |
|                 |              |              |              |              |              | 0.972        | 1.199        | 1.032        |               |               |               | O15547       | P2RX6     | P2X purinoceptor 6                                             |
| 1.002           | 1.009        | 0.992        | 1.066        | 0.917        | 1.030        | 1.011        | 1.132        | 1.000        | 0.988         | 1.068         | 1.037         | Q9NUG6       | PDRG1     | p53 and DNA damage-regulated protein 1                         |
|                 |              |              |              |              |              |              |              |              | 1.418         | 0.902         | 1.343         | Q96FX8       | PERP      | p53 apoptosis effector related to PMP-22                       |
| 1.089           | 0.987        | 1.074        | 1.052        | 1.051        | 1.070        | 0.984        | 1.111        | 1.099        | 0.940         | 0.983         | 1.048         | Q504Q3       | PAN2      | PAB-dependent poly(A)-specific ribonuclease subunit PAN2       |

| Abundance Ratio |              |              |              |              |              |              |              |              |               |               |               | Accession ID | Gene name | Protein Description                                                 |
|-----------------|--------------|--------------|--------------|--------------|--------------|--------------|--------------|--------------|---------------|---------------|---------------|--------------|-----------|---------------------------------------------------------------------|
| 1 d<br>M1/C1    | 1 d<br>M2/C2 | 1 d<br>M3/C3 | 4 d<br>M1/C1 | 4 d<br>M2/C2 | 4 d<br>M3/C3 | 7 d<br>M1/C1 | 7 d<br>M2/C2 | 7 d<br>M3/C3 | 10 d<br>M1/C1 | 10 d<br>M2/C2 | 10 d<br>M3/C3 |              |           |                                                                     |
| 1.190           | 0.958        | 1.064        | 0.904        | 1.021        | 1.038        | 1.031        | 0.987        | 0.979        | 0.995         | 0.981         | 0.992         | Q58A45       | PAN3      | PAB-dependent poly(A)-specific ribonuclease subunit PAN3            |
| 1.000           | 1.005        | 1.006        | 0.992        | 0.968        | 1.002        | 0.997        | 1.090        | 1.004        | 0.939         | 0.987         | 0.979         | Q15645       | TRIP13    | Pachytene checkpoint protein 2 homolog                              |
| 1.009           | 1.029        | 1.008        | 0.977        | 0.976        | 1.023        | 0.976        | 1.054        | 1.040        | 0.972         | 0.982         | 1.047         | Q96ST3       | SIN3A     | Paired amphipathic helix protein Sin3a                              |
|                 |              |              | 1.188        | 0.996        | 1.054        |              |              |              |               |               |               | Q02962       | PAX2      | Paired box protein Pax-2                                            |
| 1.077           | 0.947        | 1.017        | 0.987        | 0.957        | 1.190        | 0.991        | 0.898        | 1.036        | 1.166         | 0.973         | 1.168         | Q99453       | PHOX2B    | Paired mesoderm homeobox protein 2B                                 |
| 1.051           | 1.026        | 1.017        | 1.027        | 0.936        | 0.957        | 1.034        | 1.091        | 0.977        | 1.079         | 1.044         | 1.033         | Q8WX93       | PALLD     | Palladin                                                            |
| 1.074           | 1.020        | 0.973        | 1.125        | 1.097        | 1.042        | 1.198        | 1.265        | 1.131        | 1.288         | 1.280         | 1.133         | P50897       | PPT1      | Palmitoyl-protein thioesterase 1                                    |
|                 |              |              |              |              |              | 0.971        | 1.159        | 0.712        | 1.151         | 0.924         | 1.199         | F8W6M3       | ZDHHC3    | Palmitoyltransferase                                                |
| 0.727           | 1.023        | 0.981        | 1.465        | 1.005        | 1.102        | 1.088        | 1.014        | 0.990        |               |               |               | Q8IUH4       | ZDHHC13   | Palmitoyltransferase ZDHHC13                                        |
|                 |              |              |              |              |              |              |              |              | 1.137         | 0.951         | 1.176         | Q8IUH5       | ZDHHC17   | Palmitoyltransferase ZDHHC17                                        |
|                 |              |              | 1.217        | 1.017        | 0.884        | 1.220        | 1.070        | 1.084        |               |               |               | Q9NUE0       | ZDHHC18   | Palmitoyltransferase ZDHHC18                                        |
|                 |              |              | 1.061        | 1.836        | 0.907        | 1.046        | 0.909        | 1.106        | 0.956         | 0.860         | 0.828         | Q8IVQ6       | ZDHHC21   | Palmitoyltransferase ZDHHC21                                        |
| 1.077           | 0.985        | 1.022        | 1.012        | 0.939        | 1.036        | 1.137        | 0.978        | 1.010        | 1.168         | 1.008         | 1.103         | Q9C0B5       | ZDHHC5    | Palmitoyltransferase ZDHHC5                                         |
| 1.030           | 0.838        | 1.120        |              |              |              |              |              |              |               |               |               | X6R7I6       | PPDPF     | Pancreatic progenitor cell differentiation and proliferation factor |
| 0.968           | 1.051        | 0.952        | 1.020        | 0.875        | 1.085        | 1.052        | 1.191        | 1.089        | 1.066         | 1.037         | 1.082         | Q96RD7       | PANX1     | Pannexin-1                                                          |
| 1.113           | 1.110        | 0.975        | 1.071        | 0.975        | 1.026        | 1.051        | 1.118        | 0.985        | 1.055         | 0.952         | 1.063         | Q9BZ23       | PANK2     | Pantothenate kinase 2, mitochondrial                                |
| 1.106           | 1.009        | 1.044        | 1.115        | 0.939        | 0.984        | 1.036        | 1.115        | 1.139        | 0.966         | 1.000         | 1.004         | Q9H999       | PANK3     | Pantothenate kinase 3                                               |
| 1.007           | 1.012        | 1.013        | 1.012        | 0.945        | 0.988        | 0.974        | 1.084        | 1.005        | 0.969         | 0.972         | 1.013         | Q9NVE7       | PANK4     | Pantothenate kinase 4                                               |
| 1.289           | 0.851        | 0.958        | 1.030        | 1.078        | 1.867        | 0.845        | 0.598        | 0.938        |               |               |               | O95428       | PAPLN     | Papilin                                                             |
| 1.023           | 0.983        | 1.006        | 0.993        | 0.970        | 1.026        | 1.023        | 1.065        | 1.006        | 0.999         | 1.007         | 1.041         | Q6P1J9       | CDC73     | Parafibromin                                                        |
| 0.994           | 0.885        | 1.148        | 0.908        | 0.964        | 1.021        |              |              |              | 1.517         | 1.490         | 0.897         | O75781       | PALM      | Paralemmin-1                                                        |
| 0.927           | 1.237        | 0.759        |              |              |              |              |              |              |               |               |               | A6NDB9       | PALM3     | Paralemmin-3                                                        |
| 1.458           | 1.050        | 1.002        | 1.195        | 1.250        | 1.338        | 1.800        | 1.060        | 0.874        | 1.127         | 0.893         | 1.125         | Q8ND90       | PNMA1     | Paraneoplastic antigen Ma1                                          |
| 1.012           | 1.009        | 1.039        | 1.028        | 1.078        | 1.036        | 1.041        | 1.072        | 1.044        | 1.029         | 0.976         | 1.052         | A0A0J9YXF2   | PON2      | Paraoxonase 2, isoform CRA_a                                        |
| 1.010           | 1.025        | 1.058        | 1.039        | 0.918        | 1.028        | 1.053        | 1.067        | 0.979        | 1.083         | 0.998         | 1.062         | Q9UQ90       | SPG7      | Paraplegin                                                          |
| 1.003           | 1.005        | 0.987        | 0.991        | 0.992        | 0.984        | 1.002        | 1.044        | 0.990        | 0.980         | 1.014         | 0.990         | Q8WXF1       | PSPC1     | Paraspeckle component 1                                             |
| 1.046           | 0.973        | 0.968        | 0.861        | 0.919        | 1.012        | 1.018        | 0.859        | 0.885        | 1.149         | 1.030         | 1.031         | P20962       | PTMS      | Parathymosin                                                        |
| 0.964           | 1.014        | 0.988        | 0.993        | 0.941        | 1.046        | 1.059        | 1.037        | 1.025        | 1.048         | 0.999         | 1.110         | Q8TEW0       | PARD3     | Partitioning defective 3 homolog                                    |
| 1.026           | 1.045        | 1.022        | 1.034        | 0.976        | 0.995        | 1.009        | 1.017        | 0.982        | 0.993         | 1.007         | 0.973         | Q9BYG5       | PARD6B    | Partitioning defective 6 homolog beta                               |
| 1.039           | 0.966        | 0.977        | 1.006        | 0.992        | 0.954        | 1.011        | 0.983        | 0.973        | 1.082         | 1.025         | 1.031         | Q9BRP8       | PYM1      | Partner of Y14 and mago                                             |
| 1.063           | 1.019        | 1.027        | 0.990        | 0.931        | 0.939        | 0.943        | 1.070        | 0.949        | 0.956         | 0.977         | 0.990         | Q96AD5       | PNPLA2    | Patatin-like phospholipase domain-containing protein 2              |
| 1.068           | 1.024        | 1.019        | 0.984        | 0.941        | 1.010        | 1.038        | 1.090        | 1.010        | 0.974         | 0.950         | 1.004         | Q9Y5B6       | PAXBP1    | PAX3- and PAX7-binding protein 1                                    |

| Abundance Ratio |              |              |              |              |              |              |              |              |               |               |               | Accession ID | Gene name | Protein Description                                                 |
|-----------------|--------------|--------------|--------------|--------------|--------------|--------------|--------------|--------------|---------------|---------------|---------------|--------------|-----------|---------------------------------------------------------------------|
| 1 d<br>M1/C1    | 1 d<br>M2/C2 | 1 d<br>M3/C3 | 4 d<br>M1/C1 | 4 d<br>M2/C2 | 4 d<br>M3/C3 | 7 d<br>M1/C1 | 7 d<br>M2/C2 | 7 d<br>M3/C3 | 10 d<br>M1/C1 | 10 d<br>M2/C2 | 10 d<br>M3/C3 |              |           |                                                                     |
| 0.930           | 0.971        | 0.971        | 0.954        | 1.067        | 0.994        | 0.955        | 0.746        | 0.976        | 0.947         | 0.984         | 1.025         | A0A1B0GTU4   | PXN       | Paxillin                                                            |
| 1.062           | 1.044        | 1.018        | 0.917        | 0.933        | 1.047        | 1.009        | 1.103        | 1.102        | 0.935         | 0.937         | 1.035         | Q6ZW49       | PAXIP1    | PAX-interacting protein 1                                           |
| 1.009           | 0.987        | 1.144        | 0.988        | 1.120        | 1.139        | 1.097        | 0.923        | 1.114        | 1.204         | 1.017         | 1.284         | Q9BTK6       | PAGR1     | PAXIP1-associated glutamate-rich protein 1                          |
| 0.994           | 1.008        | 0.988        | 0.954        | 0.965        | 0.994        | 0.979        | 0.946        | 0.982        | 0.997         | 1.010         | 0.981         | O75475       | PSIP1     | PC4 and SFRS1-interacting protein                                   |
| 0.995           | 0.969        | 1.016        | 0.991        | 0.991        | 1.081        | 1.031        | 0.985        | 1.013        | 0.988         | 1.052         | 1.060         | Q5JVF3       | PCID2     | PCI domain-containing protein 2                                     |
| 1.061           | 1.002        | 1.007        | 1.023        | 0.956        | 0.959        | 1.012        | 1.073        | 1.023        | 1.081         | 0.961         | 1.060         | Q9Y365       | STARD10   | PCTP-like protein                                                   |
| 1.008           | 0.987        | 0.986        | 0.998        | 1.072        | 0.963        | 1.009        | 0.964        | 0.982        | 0.977         | 0.968         | 1.005         | O00151       | PDLIM1    | PDZ and LIM domain protein 1                                        |
| 1.022           | 1.075        | 1.031        | 1.043        | 1.022        | 1.041        | 1.055        | 1.059        | 0.979        | 0.970         | 0.947         | 1.037         | P50479       | PDLIM4    | PDZ and LIM domain protein 4                                        |
| 1.018           | 1.000        | 1.002        | 1.003        | 1.036        | 0.925        | 1.034        | 0.964        | 0.956        | 0.998         | 0.961         | 0.993         | Q96HC4       | PDLIM5    | PDZ and LIM domain protein 5                                        |
|                 |              |              |              |              |              |              |              |              | 1.040         | 0.897         | 1.153         | D6RH06       | PDLIM7    | PDZ and LIM domain protein 7 (Fragment)                             |
| 0.788           | 0.852        | 1.089        | 0.753        | 1.316        | 1.114        | 0.924        | 0.494        | 1.114        | 1.099         | 1.137         | 1.342         | D6RAN1       | PDLIM7    | PDZ and LIM domain protein 7 (Fragment)                             |
| 1.021           | 1.007        | 1.007        | 0.974        | 1.037        | 0.973        | 1.037        | 0.925        | 1.006        | 0.971         | 0.942         | 1.026         | Q9NR12       | PDLIM7    | PDZ and LIM domain protein 7                                        |
| 0.969           | 0.998        | 0.966        | 1.002        | 0.878        | 1.044        | 0.956        | 1.119        | 1.035        | 0.945         | 1.042         | 0.976         | Q8NEN9       | PDZD8     | PDZ domain-containing protein 8                                     |
| 1.054           | 0.964        | 1.047        | 0.976        | 0.959        | 1.021        | 1.059        | 0.924        | 1.010        | 1.011         | 0.929         | 1.072         | O14908       | GIPC1     | PDZ domain-containing protein GIPC1                                 |
| 0.958           | 0.961        | 1.188        |              |              |              | 0.985        | 1.094        | 1.010        | 1.064         | 0.946         | 1.135         | Q13113       | PDZK1IP1  | PDZK1-interacting protein 1                                         |
| 1.049           | 0.933        | 1.068        | 0.947        | 0.918        | 1.027        | 0.974        | 1.262        | 1.075        | 0.926         | 0.922         | 0.999         | Q9H6A9       | PCNX3     | Pecanex-like protein 3                                              |
| 1.077           | 1.032        | 1.022        | 1.058        | 1.138        | 1.049        | 0.947        | 1.019        | 0.954        | 0.920         | 1.009         | 0.919         | Q9UBV8       | PEF1      | Peflin                                                              |
| 1.016           | 0.994        | 1.025        | 0.965        | 0.967        | 1.023        | 0.995        | 1.005        | 0.983        | 0.985         | 0.994         | 1.002         | Q96EY7       | PTCD3     | Pentatricopeptide repeat domain-containing protein 3, mitochondrial |
| 0.993           | 0.974        | 0.957        | 1.035        | 0.995        | 1.007        | 1.012        | 0.861        | 0.812        | 1.057         | 0.981         | 1.002         | Q8WV60       | PTCD2     | Pentatricopeptide repeat-containing protein 2, mitochondrial        |
|                 |              |              |              |              |              | 1.539        | 0.922        | 1.198        |               |               |               | Q96A99       | PTX4      | Pentraxin-4                                                         |
|                 |              |              | 0.986        | 0.846        | 1.347        | 0.902        | 0.910        | 0.972        | 1.029         | 1.024         | 1.022         | P26022       | PTX3      | Pentraxin-related protein PTX3                                      |
| 0.970           | 0.991        | 1.003        | 0.993        | 0.956        | 1.002        | 1.072        | 1.004        | 0.974        | 0.998         | 0.949         | 1.068         | Q8IYS1       | PM20D2    | Peptidase M20 domain-containing protein 2                           |
| 0.991           | 0.941        | 0.984        | 1.172        | 1.059        | 1.046        | 1.169        | 1.036        | 0.961        |               |               |               | O75570       | MTRF1     | Peptide chain release factor 1, mitochondrial                       |
| 0.895           | 1.338        | 1.172        | 1.100        | 1.035        | 1.047        | 0.924        | 0.866        | 1.057        | 1.086         | 1.010         | 1.031         | Q9UGC7       | MTRF1L    | Peptide chain release factor 1-like, mitochondrial                  |
| 0.765           | 1.007        | 1.011        | 1.030        | 1.040        | 0.960        | 1.010        | 1.081        | 1.093        | 0.971         | 0.990         | 1.058         | Q9H8H1       | PDF       | Peptide deformylase, mitochondrial                                  |
| 1.005           | 0.956        | 1.017        | 0.976        | 0.926        | 1.050        | 1.024        | 1.052        | 1.024        | 1.006         | 1.010         | 1.073         | Q96IV0       | NGLY1     | Peptide-N(4)-(N-acetyl-beta-glucosaminy)asparagine amidase          |
| 1.038           | 0.992        | 1.042        | 1.040        | 0.962        | 0.996        | 0.993        | 1.061        | 1.018        | 1.062         | 1.024         | 0.994         | H7BZ14       | PPIL3     | Peptidyl-prolyl cis-trans isomerase (Fragment)                      |
| 1.023           | 0.979        | 0.977        | 1.015        | 1.061        | 1.006        | 1.018        | 0.917        | 1.019        | 0.993         | 0.978         | 1.009         | P62937       | PPIA      | Peptidyl-prolyl cis-trans isomerase A                               |
| 1.058           | 0.992        | 1.010        | 1.075        | 1.038        | 0.990        | 1.037        | 0.955        | 1.006        | 0.982         | 1.013         | 0.961         | P23284       | PPIB      | Peptidyl-prolyl cis-trans isomerase B                               |
| 1.029           | 1.040        | 0.992        | 1.001        | 0.984        | 1.009        | 0.993        | 1.082        | 1.017        | 1.000         | 0.944         | 1.050         | P45877       | PPIC      | Peptidyl-prolyl cis-trans isomerase C                               |
| 0.997           | 0.971        | 1.007        | 0.993        | 0.946        | 0.974        | 0.993        | 1.013        | 0.994        | 0.997         | 1.002         | 1.046         | Q6UX04       | CWC27     | Peptidyl-prolyl cis-trans isomerase CWC27 homolog                   |

| Abundance Ratio |              |              |              |              |              |              |              |              |               |               |               | Accession ID | Gene name | Protein Description                                                |
|-----------------|--------------|--------------|--------------|--------------|--------------|--------------|--------------|--------------|---------------|---------------|---------------|--------------|-----------|--------------------------------------------------------------------|
| 1 d<br>M1/C1    | 1 d<br>M2/C2 | 1 d<br>M3/C3 | 4 d<br>M1/C1 | 4 d<br>M2/C2 | 4 d<br>M3/C3 | 7 d<br>M1/C1 | 7 d<br>M2/C2 | 7 d<br>M3/C3 | 10 d<br>M1/C1 | 10 d<br>M2/C2 | 10 d<br>M3/C3 |              |           |                                                                    |
| 0.999           | 0.987        | 0.992        | 0.999        | 0.957        | 0.998        | 0.999        | 1.063        | 1.018        | 0.994         | 0.962         | 1.006         | Q08752       | PPID      | Peptidyl-prolyl cis-trans isomerase D                              |
| 1.028           | 0.998        | 1.018        | 0.954        | 0.960        | 1.024        | 1.010        | 1.056        | 1.050        | 1.028         | 0.975         | 1.066         | Q9UNP9       | PPIE      | Peptidyl-prolyl cis-trans isomerase E                              |
| 1.017           | 0.986        | 0.962        | 1.022        | 0.972        | 1.007        | 0.997        | 1.034        | 0.941        | 0.976         | 0.945         | 0.947         | P30405       | PPIF      | Peptidyl-prolyl cis-trans isomerase F, mitochondrial               |
| 0.990           | 1.013        | 0.971        | 1.024        | 1.019        | 1.034        | 1.017        | 1.040        | 0.994        | 1.040         | 1.021         | 1.016         | Q96AY3       | FKBP10    | Peptidyl-prolyl cis-trans isomerase FKBP10                         |
|                 |              |              |              |              |              |              |              |              | 0.908         | 0.954         | 0.958         | HOYHM7       | FKBP11    | Peptidyl-prolyl cis-trans isomerase FKBP11 (Fragment)              |
| 1.001           | 0.951        | 1.013        | 0.977        | 0.967        | 0.986        | 1.012        | 1.121        | 0.975        | 0.990         | 0.965         | 0.967         | Q9NYL4       | FKBP11    | Peptidyl-prolyl cis-trans isomerase FKBP11                         |
| 1.069           | 0.935        | 1.000        | 0.962        | 0.880        | 0.988        | 0.959        | 1.082        | 0.975        | 0.981         | 1.004         | 0.979         | Q9NWM8       | FKBP14    | Peptidyl-prolyl cis-trans isomerase FKBP14                         |
| 0.970           | 0.994        | 1.020        | 0.984        | 0.931        | 0.994        | 0.945        | 0.953        | 0.997        | 0.932         | 0.972         | 0.983         | P62942       | FKBP1A    | Peptidyl-prolyl cis-trans isomerase FKBP1A                         |
| 1.026           | 0.986        | 1.027        | 0.982        | 1.044        | 0.992        | 0.975        | 1.041        | 1.025        | 0.971         | 1.019         | 0.987         | P26885       | FKBP2     | Peptidyl-prolyl cis-trans isomerase FKBP2                          |
| 1.019           | 0.981        | 0.978        | 0.960        | 0.976        | 0.968        | 0.945        | 0.921        | 0.957        | 0.974         | 0.971         | 0.962         | Q00688       | FKBP3     | Peptidyl-prolyl cis-trans isomerase FKBP3                          |
| 1.004           | 0.999        | 0.990        | 1.017        | 1.072        | 1.001        | 1.013        | 1.031        | 1.020        | 0.960         | 1.007         | 0.978         | Q02790       | FKBP4     | Peptidyl-prolyl cis-trans isomerase FKBP4                          |
| 0.987           | 1.001        | 0.974        | 1.018        | 1.032        | 1.000        | 0.997        | 1.008        | 0.983        | 0.988         | 1.001         | 0.990         | Q13451       | FKBP5     | Peptidyl-prolyl cis-trans isomerase FKBP5                          |
| 1.023           | 0.986        | 0.981        | 1.021        | 0.993        | 0.995        | 1.060        | 1.034        | 1.021        | 1.068         | 1.014         | 0.968         | O95302       | FKBP9     | Peptidyl-prolyl cis-trans isomerase FKBP9                          |
| 0.941           | 0.968        | 0.982        | 0.976        | 1.063        | 1.010        | 0.964        | 0.777        | 1.008        | 0.997         | 0.991         | 1.022         | Q13427       | PPIG      | Peptidyl-prolyl cis-trans isomerase G                              |
| 1.033           | 0.997        | 1.008        | 0.977        | 0.938        | 1.013        | 0.998        | 1.053        | 0.983        | 0.980         | 1.001         | 1.017         | O43447       | PPIH      | Peptidyl-prolyl cis-trans isomerase H                              |
| 1.011           | 0.984        | 0.953        | 1.003        | 1.061        | 1.026        | 1.027        | 0.992        | 1.043        | 1.027         | 0.991         | 1.062         | Q13526       | PIN1      | Peptidyl-prolyl cis-trans isomerase NIMA-interacting 1             |
|                 |              |              | 1.095        | 1.717        | 0.805        | 0.955        | 1.075        | 1.003        |               |               |               | F8WE65       | PPIA      | Peptidyl-prolyl cis-trans isomerase                                |
| 1.010           | 1.007        | 0.969        | 1.045        | 1.112        | 0.978        | 1.024        | 0.966        | 0.992        | 1.037         | 1.069         | 1.035         | Q9Y3C6       | PPIL1     | Peptidyl-prolyl cis-trans isomerase-like 1                         |
| 0.990           | 1.022        | 1.019        | 1.009        | 0.970        | 1.009        | 1.010        | 1.009        | 0.980        | 1.073         | 0.951         | 1.067         | Q13356       | PPIL2     | Peptidyl-prolyl cis-trans isomerase-like 2                         |
| 1.050           | 0.961        | 1.005        | 0.984        | 0.967        | 1.003        | 1.043        | 0.977        | 1.050        | 0.994         | 1.008         | 1.020         | Q8WUA2       | PPIL4     | Peptidyl-prolyl cis-trans isomerase-like 4                         |
| 0.985           | 0.991        | 1.015        | 1.005        | 0.968        | 1.037        | 1.008        | 0.938        | 0.996        | 0.993         | 0.980         | 1.057         | A0A0A0MT60   | FKBP15    | Peptidylprolyl isomerase (Fragment)                                |
| 0.994           | 0.967        | 1.005        | 0.983        | 1.012        | 1.024        | 1.005        | 0.962        | 1.014        | 1.010         | 0.999         | 1.001         | Q96BP3       | PPWD1     | Peptidylprolyl isomerase domain and WD repeat-containing protein 1 |
| 0.940           | 1.005        | 1.005        | 0.965        | 0.965        | 0.994        | 1.005        | 0.987        | 1.042        | 0.994         | 1.051         | 0.996         | J3KQ48       | PTRH2     | Peptidyl-tRNA hydrolase 2, mitochondrial                           |
| 0.974           | 1.004        | 0.983        | 1.006        | 1.046        | 0.989        | 1.017        | 0.947        | 1.024        | 1.091         | 1.004         | 1.088         | Q14197       | MRPL58    | Peptidyl-tRNA hydrolase ICT1, mitochondrial                        |
| 1.157           | 1.067        | 0.993        | 1.007        | 1.042        | 1.181        | 1.051        | 1.041        | 0.946        | 1.154         | 1.115         | 1.006         | P55201       | BRPF1     | Peregrin                                                           |
| 0.982           | 0.965        | 1.070        | 1.018        | 0.948        | 1.044        | 1.030        | 0.973        | 0.992        | 0.972         | 1.038         | 1.191         | O95613       | PCNT      | Pericentrin                                                        |
| 0.936           | 0.977        | 0.986        | 1.012        | 1.015        | 1.033        | 1.036        | 0.995        | 1.036        | 1.043         | 1.011         | 1.130         | Q15154       | PCM1      | Pericentriolar material 1 protein                                  |
| 0.988           | 1.000        | 0.999        | 0.939        | 0.937        | 0.956        | 0.897        | 0.914        | 0.936        | 0.921         | 0.944         | 0.927         | Q99541       | PLIN2     | Perilipin-2                                                        |
| 0.993           | 1.067        | 1.068        | 0.974        | 0.971        | 0.912        | 1.041        | 0.946        | 0.960        | 1.039         | 1.015         | 1.207         | O60664       | PLIN3     | Perilipin-3                                                        |
| 1.060           | 1.018        | 1.028        | 1.002        | 1.029        | 0.938        | 1.037        | 1.038        | 1.067        | 0.978         | 0.998         | 1.030         | Q13610       | PWP1      | Periodic tryptophan protein 1 homolog                              |
| 1.033           | 0.966        | 1.024        | 0.993        | 0.977        | 1.051        | 1.006        | 1.063        | 1.043        | 1.016         | 1.014         | 1.009         | Q15269       | PWP2      | Periodic tryptophan protein 2 homolog                              |

| Abundance Ratio |              |              |              |              |              |              |              |              |               |               |               | Accession ID | Gene name | Protein Description                                 |
|-----------------|--------------|--------------|--------------|--------------|--------------|--------------|--------------|--------------|---------------|---------------|---------------|--------------|-----------|-----------------------------------------------------|
| 1 d<br>M1/C1    | 1 d<br>M2/C2 | 1 d<br>M3/C3 | 4 d<br>M1/C1 | 4 d<br>M2/C2 | 4 d<br>M3/C3 | 7 d<br>M1/C1 | 7 d<br>M2/C2 | 7 d<br>M3/C3 | 10 d<br>M1/C1 | 10 d<br>M2/C2 | 10 d<br>M3/C3 |              |           |                                                     |
| 0.980           | 0.996        | 0.999        | 0.984        | 0.968        | 0.993        | 1.010        | 1.058        | 0.989        | 1.041         | 0.995         | 1.047         | O14936       | CASK      | Peripheral plasma membrane protein CASK             |
| 1.078           | 1.040        | 0.968        | 1.001        | 0.999        | 0.980        | 1.008        | 1.013        | 0.954        | 1.066         | 1.067         | 1.006         | F8W0Q9       | PPHLN1    | Periphrilin-1                                       |
| 0.872           | 0.938        | 1.029        | 0.975        | 0.953        | 1.046        | 0.925        | 0.959        | 1.028        | 0.971         | 1.031         | 1.180         | Q8NEY8       | PPHLN1    | Periphrilin-1                                       |
| 0.981           | 0.935        | 0.994        | 0.942        | 0.901        | 0.947        | 0.942        | 0.831        | 0.957        | 1.064         | 0.970         | 1.016         | O60437       | PPL       | Periplakin                                          |
| 0.981           | 1.001        | 0.954        | 0.996        | 1.013        | 0.975        | 1.012        | 1.007        | 1.015        | 0.994         | 0.981         | 0.976         | Q06830       | PRDX1     | Peroxiredoxin-1                                     |
| 1.044           | 1.002        | 1.032        | 0.995        | 0.988        | 1.014        | 0.997        | 1.039        | 1.006        | 0.999         | 0.997         | 1.032         | P32119       | PRDX2     | Peroxiredoxin-2                                     |
| 1.046           | 1.006        | 1.002        | 1.090        | 0.941        | 1.036        | 1.036        | 1.078        | 0.970        | 1.031         | 0.992         | 1.000         | Q13162       | PRDX4     | Peroxiredoxin-4                                     |
| 1.029           | 0.996        | 0.997        | 1.004        | 1.034        | 1.011        | 1.011        | 1.068        | 1.066        | 1.003         | 0.996         | 1.008         | P30044       | PRDX5     | Peroxiredoxin-5, mitochondrial                      |
| 0.991           | 0.997        | 1.004        | 1.011        | 1.010        | 1.018        | 0.990        | 1.041        | 1.029        | 0.966         | 1.008         | 0.944         | P30041       | PRDX6     | Peroxiredoxin-6                                     |
| 1.025           | 1.072        | 1.050        | 0.981        | 1.038        | 1.018        | 1.000        | 1.002        | 1.003        | 1.057         | 1.031         | 1.057         | Q9NUI1       | DECR2     | Peroxisomal 2,4-dienoyl-CoA reductase               |
| 1.057           | 1.006        | 1.012        | 1.002        | 0.973        | 1.034        | 1.021        | 1.082        | 1.088        | 0.943         | 1.030         | 0.979         | Q15067       | ACOX1     | Peroxisomal acyl-coenzyme A oxidase 1               |
| 1.492           | 0.954        | 0.959        | 1.319        | 0.898        | 1.004        | 1.267        | 1.004        | 1.018        | 1.163         | 0.931         | 1.030         | O15254       | ACOX3     | Peroxisomal acyl-coenzyme A oxidase 3               |
| 1.022           | 0.988        | 1.034        | 0.996        | 0.981        | 0.979        | 1.001        | 1.046        | 1.010        | 1.026         | 0.980         | 1.041         | Q08426       | EHHADH    | Peroxisomal bifunctional enzyme                     |
| 1.091           | 1.042        | 1.059        | 0.986        | 0.965        | 1.010        | 0.978        | 1.008        | 0.990        | 1.050         | 1.020         | 1.040         | P40855       | PEX19     | Peroxisomal biogenesis factor 19                    |
| 0.984           | 0.935        | 1.013        | 0.989        | 0.867        | 1.008        | 0.991        | 1.096        | 1.017        | 0.975         | 1.009         | 1.015         | P56589       | PEX3      | Peroxisomal biogenesis factor 3                     |
|                 |              |              | 0.846        | 1.013        | 0.953        |              |              |              |               |               |               | P0C024       | NUDT7     | Peroxisomal coenzyme A diphosphatase NUDT7          |
| 1.077           | 0.993        | 1.013        | 1.116        | 0.931        | 1.042        | 1.088        | 0.860        | 1.094        |               |               |               | O75192       | PEX11A    | Peroxisomal membrane protein 11A                    |
| 0.914           | 0.965        | 0.992        | 0.990        | 0.930        | 1.077        | 1.031        | 0.961        | 1.038        | 1.086         | 1.044         | 1.074         | O96011       | PEX11B    | Peroxisomal membrane protein 11B                    |
| 0.961           | 1.046        | 1.028        | 0.990        | 0.964        | 1.029        | 1.010        | 1.042        | 1.028        | 1.133         | 0.993         | 1.062         | Q9NR77       | PXMP2     | Peroxisomal membrane protein 2                      |
| 1.158           | 1.032        | 1.078        | 1.026        | 0.912        | 0.940        | 1.039        | 0.871        | 0.969        | 0.892         | 1.043         | 0.818         | Q9Y6I8       | PXMP4     | Peroxisomal membrane protein 4                      |
| 1.013           | 0.995        | 1.013        | 1.014        | 0.950        | 1.010        |              |              |              | 1.073         | 1.021         | 1.021         | Q92968       | PEX13     | Peroxisomal membrane protein PEX13                  |
| 0.978           | 1.004        | 0.999        | 0.940        | 0.964        | 0.997        | 0.983        | 0.972        | 0.980        | 1.049         | 0.987         | 1.041         | O75381       | PEX14     | Peroxisomal membrane protein PEX14                  |
| 1.012           | 0.963        | 1.056        | 1.017        | 0.894        | 0.952        | 1.044        | 1.103        | 0.985        | 1.076         | 1.130         | 0.945         | O43808       | SLC25A17  | Peroxisomal membrane protein PMP34                  |
| 0.984           | 0.997        | 0.989        | 0.991        | 0.984        | 0.982        | 0.994        | 0.997        | 0.978        | 0.961         | 0.938         | 0.989         | P51659       | HSD17B4   | Peroxisomal multifunctional enzyme type 2           |
| 1.340           | 1.036        | 1.296        | 1.010        | 1.175        | 0.952        | 1.007        | 1.250        | 1.091        | 1.124         | 0.964         | 1.124         | Q6QHF9       | PAOX      | Peroxisomal N(1)-acetyl-spermine/spermidine oxidase |
| 1.031           | 1.003        | 1.022        | 0.978        | 1.003        | 1.002        | 1.055        | 0.887        | 0.997        | 1.067         | 1.087         | 1.064         | Q9BQG2       | NUDT12    | Peroxisomal NADH pyrophosphatase NUDT12             |
| 0.989           | 0.968        | 1.012        | 1.046        | 0.961        | 1.055        | 1.073        | 1.049        | 1.049        | 1.150         | 0.968         | 1.096         | B4E0T2       | PEX5      | Peroxisomal targeting signal 1 receptor             |
| 1.081           | 1.014        | 1.037        | 1.084        | 0.911        | 1.004        | 1.109        | 1.095        | 1.424        | 1.079         | 0.996         | 1.034         | O00628       | PEX7      | Peroxisomal targeting signal 2 receptor             |
| 1.005           | 0.996        | 1.029        | 0.970        | 0.981        | 1.014        | 1.015        | 1.027        | 0.972        | 0.994         | 0.971         | 1.007         | Q9BY49       | PECR      | Peroxisomal trans-2-enoyl-CoA reductase             |
|                 |              |              |              |              |              | 1.182        | 1.040        | 1.034        |               |               |               | Q13608       | PEX6      | Peroxisome assembly factor 2                        |
| 1.031           | 0.914        | 1.018        | 1.021        | 1.010        | 1.017        | 1.077        | 1.104        | 1.052        | 1.050         | 0.998         | 1.062         | O43933       | PEX1      | Peroxisome biogenesis factor 1                      |
|                 |              |              | 1.005        | 0.839        | 1.117        |              |              |              |               |               |               | P28328       | PEX2      | Peroxisome biogenesis factor 2                      |
| 1.156           | 0.987        | 1.049        | 1.036        | 1.308        | 0.999        | 1.066        | 0.931        | 1.130        | 1.004         | 1.019         | 1.001         | M0QXB5       | ETHE1     | Persulfide dioxygenase ETHE1, mitochondrial         |



| Abundance Ratio |              |              |              |              |              |              |              |              |               |               |               | Accession ID | Gene name | Protein Description                                                  |
|-----------------|--------------|--------------|--------------|--------------|--------------|--------------|--------------|--------------|---------------|---------------|---------------|--------------|-----------|----------------------------------------------------------------------|
| 1 d<br>M1/C1    | 1 d<br>M2/C2 | 1 d<br>M3/C3 | 4 d<br>M1/C1 | 4 d<br>M2/C2 | 4 d<br>M3/C3 | 7 d<br>M1/C1 | 7 d<br>M2/C2 | 7 d<br>M3/C3 | 10 d<br>M1/C1 | 10 d<br>M2/C2 | 10 d<br>M3/C3 |              |           |                                                                      |
| 1.022           | 1.004        | 1.044        | 1.013        | 1.012        | 1.041        | 1.021        | 0.935        | 1.027        | 1.034         | 1.026         | 1.032         | O00541       | PES1      | Pescadillo homolog                                                   |
| 1.015           | 0.983        | 0.949        | 0.962        | 0.966        | 1.005        | 0.967        | 0.959        | 0.973        | 1.008         | 1.014         | 0.990         | Q8WW12       | PCNP      | PEST proteolytic signal-containing nuclear protein                   |
| 0.959           | 0.966        | 1.084        | 0.990        | 0.942        | 1.017        | 1.094        | 1.007        | 1.055        | 1.119         | 1.019         | 1.108         | Q9NYI0       | PSD3      | PH and SEC7 domain-containing protein 3                              |
| 1.057           | 1.026        | 1.091        | 1.003        | 1.188        | 1.089        | 1.051        | 0.494        | 0.953        | 1.007         | 1.116         | 1.208         | Q9P1Y6       | PHRF1     | PHD and RING finger domain-containing protein 1                      |
| 1.081           | 1.025        | 0.949        | 0.954        | 0.972        | 1.040        | 0.973        | 1.034        | 1.019        | 1.029         | 0.983         | 1.024         | O43189       | PHF1      | PHD finger protein 1                                                 |
| 1.011           | 1.024        | 0.999        | 0.960        | 0.930        | 0.945        | 0.991        | 1.130        | 1.049        | 0.987         | 1.007         | 1.069         | Q8WUB8       | PHF10     | PHD finger protein 10                                                |
| 0.962           | 1.272        | 0.952        | 0.987        | 0.872        | 0.924        |              |              |              | 1.262         | 1.050         | 1.274         | Q96QT6       | PHF12     | PHD finger protein 12                                                |
| 0.983           | 0.998        | 0.998        | 0.959        | 0.932        | 1.015        | 1.015        | 0.987        | 0.957        | 0.978         | 1.003         | 0.981         | A0A0U1RRH6   | PHF14     | PHD finger protein 14                                                |
|                 |              |              |              |              |              |              |              |              | 1.475         | 1.019         | 1.042         | G3XAA4       | JADE2     | PHD finger protein 15, isoform CRA_d                                 |
| 1.266           | 2.802        | 1.154        |              |              |              |              |              |              |               |               |               | Q9BVI0       | PHF20     | PHD finger protein 20                                                |
| 0.971           | 1.001        | 1.023        | 1.053        | 0.992        | 1.041        | 0.985        | 0.943        | 0.955        | 1.139         | 1.153         | 1.193         | F8W9L8       | PHF20L1   | PHD finger protein 20-like protein 1                                 |
| 1.052           | 1.009        | 0.975        | 0.994        | 0.930        | 0.999        | 1.042        | 0.990        | 0.973        | 1.059         | 1.013         | 1.033         | Q9BUL5       | PHF23     | PHD finger protein 23                                                |
| 1.008           | 0.979        | 1.055        | 0.996        | 0.951        | 1.020        | 0.983        | 0.914        | 1.005        | 1.067         | 1.006         | 1.028         | Q92576       | PHF3      | PHD finger protein 3                                                 |
| 0.993           | 0.960        | 0.966        | 0.959        | 0.983        | 0.982        | 1.014        | 0.911        | 0.981        | 1.041         | 0.993         | 1.094         | A0A0D9SGE8   | PHF6      | PHD finger protein 6                                                 |
| 1.027           | 0.979        | 0.960        | 0.989        | 1.174        | 0.993        | 1.065        | 0.912        | 0.991        | 1.051         | 1.053         | 1.004         | Q7RTV0       | PHF5A     | PHD finger-like domain-containing protein 5A                         |
| 1.121           | 0.768        | 0.830        | 0.907        | 1.042        | 1.121        | 0.833        | 1.078        | 1.094        | 0.937         | 0.942         | 1.012         | P30039       | PBLD      | Phenazine biosynthesis-like domain-containing protein                |
| 0.987           | 0.987        | 1.005        | 0.998        | 0.990        | 1.016        | 0.992        | 1.002        | 1.026        | 1.004         | 1.011         | 1.036         | K7ER00       | FARSA     | Phenylalanine--tRNA ligase alpha subunit                             |
| 1.038           | 0.990        | 1.008        | 1.034        | 1.009        | 1.028        | 1.031        | 1.000        | 0.982        | 0.997         | 0.998         | 0.997         | Q9NSD9       | FARSB     | Phenylalanine--tRNA ligase beta subunit                              |
| 1.003           | 0.949        | 0.988        | 0.994        | 0.972        | 1.000        | 1.027        | 1.021        | 1.051        | 1.075         | 0.975         | 1.075         | O95363       | FARS2     | Phenylalanine--tRNA ligase, mitochondrial                            |
| 1.019           | 1.010        | 0.999        | 0.963        | 0.941        | 0.978        | 1.000        | 0.993        | 0.983        | 0.936         | 0.941         | 1.029         | Q8WWQ0       | PHIP      | PH-interacting protein                                               |
|                 |              |              | 1.078        | 1.020        | 1.064        | 1.050        | 0.897        | 1.022        | 1.094         | 1.103         | 1.160         | Q13794       | PMAIP1    | Phorbol-12-myristate-13-acetate-induced protein 1                    |
| 1.039           | 0.988        | 1.011        | 1.004        | 0.976        | 1.048        | 0.999        | 1.116        | 1.065        | 0.969         | 1.065         | 1.027         | Q9H2J4       | PDCL3     | Phosducin-like protein 3                                             |
| 1.002           | 1.026        | 0.987        | 1.017        | 0.962        | 0.972        | 0.977        | 1.133        | 0.997        | 0.958         | 0.986         | 0.986         | Q13371       | PDCL      | Phosducin-like protein                                               |
| 0.952           | 1.041        | 1.016        | 0.978        | 0.970        | 1.075        | 1.038        | 0.994        | 1.000        | 1.194         | 1.043         | 1.111         | O95674       | CDS2      | Phosphatidate cytidyltransferase 2                                   |
| 1.085           | 0.941        | 0.967        | 1.191        | 1.553        | 1.029        | 1.068        | 0.930        | 1.147        | 1.124         | 1.046         | 1.019         | Q9UKL6       | PCTP      | Phosphatidylcholine transfer protein                                 |
| 1.355           | 1.267        | 0.936        |              |              |              |              |              |              |               |               |               | Q86VZ5       | SGMS1     | Phosphatidylcholine:ceramide<br>cholinephosphotransferase 1          |
| 0.993           | 1.006        | 0.952        | 0.958        | 0.989        | 0.900        | 0.961        | 0.974        | 0.940        | 0.982         | 0.968         | 0.903         | P30086       | PEBP1     | Phosphatidylethanolamine-binding protein 1                           |
| 0.977           | 1.030        | 1.053        | 0.978        | 0.990        | 1.012        | 1.019        | 0.986        | 1.025        | 1.024         | 0.984         | 1.041         | Q8WUK0       | PTPMT1    | Phosphatidylglycerophosphatase and protein-tyrosine<br>phosphatase 1 |
| 0.967           | 0.997        | 1.001        | 0.982        | 0.929        | 0.977        | 0.947        | 1.040        | 0.969        | 0.981         | 0.993         | 0.972         | Q9NTJ5       | SACM1L    | Phosphatidylinositide phosphatase SAC1                               |
| 1.042           | 0.992        | 1.012        | 0.981        | 1.048        | 1.057        | 1.052        | 0.965        | 0.965        | 1.013         | 1.041         | 1.104         | Q9Y2H2       | INPP5F    | Phosphatidylinositide phosphatase SAC2                               |

| Abundance Ratio |              |              |              |              |              |              |              |              |               |               |               | Accession ID | Gene name | Protein Description                                                                                  |
|-----------------|--------------|--------------|--------------|--------------|--------------|--------------|--------------|--------------|---------------|---------------|---------------|--------------|-----------|------------------------------------------------------------------------------------------------------|
| 1 d<br>M1/C1    | 1 d<br>M2/C2 | 1 d<br>M3/C3 | 4 d<br>M1/C1 | 4 d<br>M2/C2 | 4 d<br>M3/C3 | 7 d<br>M1/C1 | 7 d<br>M2/C2 | 7 d<br>M3/C3 | 10 d<br>M1/C1 | 10 d<br>M2/C2 | 10 d<br>M3/C3 |              |           |                                                                                                      |
| 1.081           | 0.998        | 0.996        | 1.015        | 1.033        | 1.001        | 1.014        | 0.964        | 1.030        |               |               |               | A0A0U1RR63   | PTEN      | Phosphatidylinositol 3,4,5-trisphosphate 3-phosphatase and dual-specificity protein phosphatase PTEN |
| 1.021           | 0.983        | 1.043        | 0.987        | 0.930        | 1.010        | 0.986        | 1.049        | 0.995        | 1.040         | 0.977         | 1.055         | O15357       | INPPL1    | Phosphatidylinositol 3,4,5-trisphosphate 5-phosphatase 2                                             |
| 0.999           | 0.984        | 1.005        | 0.974        | 0.956        | 1.037        | 0.997        | 1.044        | 0.997        | 0.988         | 0.973         | 1.055         | Q8NEB9       | PIK3C3    | Phosphatidylinositol 3-kinase catalytic subunit type 3                                               |
| 1.051           | 1.016        | 1.000        | 1.041        | 0.984        | 1.054        | 0.974        | 1.034        | 1.037        | 1.031         | 0.966         | 1.055         | O00459       | PIK3R2    | Phosphatidylinositol 3-kinase regulatory subunit beta                                                |
| 3.487           | 1.190        | 0.655        |              |              |              |              |              |              |               |               |               | F6TDL0       | PIK3R3    | Phosphatidylinositol 3-kinase regulatory subunit gamma                                               |
| 1.000           | 0.998        | 0.977        | 0.934        | 0.939        | 1.095        | 0.934        | 1.156        | 1.055        | 0.903         | 0.932         | 1.020         | P42336       | PIK3CA    | Phosphatidylinositol 4,5-bisphosphate 3-kinase catalytic subunit alpha isoform                       |
| 0.999           | 1.139        | 1.130        | 1.016        | 0.893        | 0.932        | 0.876        | 1.174        | 1.070        | 1.008         | 1.017         | 1.064         | P42338       | PIK3CB    | Phosphatidylinositol 4,5-bisphosphate 3-kinase catalytic subunit beta isoform                        |
| 1.041           | 1.036        | 1.050        | 0.973        | 0.963        | 1.059        | 1.039        | 1.114        | 1.017        | 0.949         | 0.943         | 1.042         | F8W9P4       | PIK3CD    | Phosphatidylinositol 4,5-bisphosphate 3-kinase catalytic subunit delta isoform                       |
| 0.986           | 0.997        | 1.052        | 0.990        | 0.949        | 1.014        | 0.985        | 1.032        | 1.017        | 0.988         | 1.019         | 1.008         | P42356       | PI4KA     | Phosphatidylinositol 4-kinase alpha                                                                  |
| 1.018           | 0.999        | 1.065        | 1.037        | 0.969        | 1.026        | 1.051        | 1.103        | 1.000        | 1.022         | 0.916         | 1.051         | A0A0B4J1S8   | PI4KB     | Phosphatidylinositol 4-kinase beta                                                                   |
| 1.045           | 0.996        | 1.017        | 1.047        | 0.895        | 1.019        | 1.074        | 1.080        | 1.016        | 1.035         | 1.010         | 1.028         | Q9BTU6       | PI4K2A    | Phosphatidylinositol 4-kinase type 2-alpha                                                           |
| 1.155           | 1.015        | 1.180        | 1.027        | 0.966        | 1.103        | 1.015        | 1.203        | 1.033        | 0.857         | 0.995         | 1.298         | Q8TCG2       | PI4K2B    | Phosphatidylinositol 4-kinase type 2-beta                                                            |
| 1.004           | 0.963        | 1.044        | 1.005        | 0.940        | 1.033        | 0.997        | 1.085        | 0.998        | 0.999         | 0.940         | 1.034         | O00443       | PIK3C2A   | Phosphatidylinositol 4-phosphate 3-kinase C2 domain-containing subunit alpha                         |
|                 |              |              |              |              |              | 0.946        | 0.893        | 0.955        |               |               |               | O00750       | PIK3C2B   | Phosphatidylinositol 4-phosphate 3-kinase C2 domain-containing subunit beta                          |
| 0.974           | 0.979        | 1.038        | 0.959        | 0.958        | 0.953        | 0.965        | 1.191        | 0.992        | 0.908         | 1.020         | 0.916         | Q99755       | PIP5K1A   | Phosphatidylinositol 4-phosphate 5-kinase type-1 alpha                                               |
| 0.959           | 0.979        | 1.053        | 1.011        | 0.952        | 1.068        | 1.037        | 0.990        | 1.053        | 1.057         | 1.042         | 1.066         | P48426       | PIP4K2A   | Phosphatidylinositol 5-phosphate 4-kinase type-2 alpha                                               |
| 1.009           | 1.000        | 1.039        | 0.988        | 0.954        | 1.036        | 1.019        | 0.990        | 0.989        | 1.051         | 1.005         | 1.022         | P78356       | PIP4K2B   | Phosphatidylinositol 5-phosphate 4-kinase type-2 beta                                                |
| 1.006           | 0.991        | 1.022        | 0.997        | 0.982        | 1.031        | 1.019        | 0.976        | 0.996        | 1.044         | 0.986         | 1.060         | Q8TBX8       | PIP4K2C   | Phosphatidylinositol 5-phosphate 4-kinase type-2 gamma                                               |
| 0.881           | 0.955        | 1.065        | 0.970        | 0.878        | 1.086        | 1.051        | 1.009        | 1.116        | 1.069         | 0.967         | 1.023         | Q9H490       | PIGU      | Phosphatidylinositol glycan anchor biosynthesis class U protein                                      |
|                 |              |              |              |              |              | 0.852        | 1.091        | 1.031        | 0.977         | 0.900         | 1.034         | P37287       | PIGA      | Phosphatidylinositol N-acetylglucosaminyltransferase subunit A                                       |
| 1.022           | 1.002        | 0.992        | 0.988        | 1.098        | 1.010        | 1.039        | 0.934        | 1.008        | 1.026         | 1.011         | 1.042         | Q00169       | PITPNA    | Phosphatidylinositol transfer protein alpha isoform                                                  |

| Abundance Ratio |              |              |              |              |              |              |              |              |               |               |               | Accession ID | Gene name | Protein Description                                               |
|-----------------|--------------|--------------|--------------|--------------|--------------|--------------|--------------|--------------|---------------|---------------|---------------|--------------|-----------|-------------------------------------------------------------------|
| 1 d<br>M1/C1    | 1 d<br>M2/C2 | 1 d<br>M3/C3 | 4 d<br>M1/C1 | 4 d<br>M2/C2 | 4 d<br>M3/C3 | 7 d<br>M1/C1 | 7 d<br>M2/C2 | 7 d<br>M3/C3 | 10 d<br>M1/C1 | 10 d<br>M2/C2 | 10 d<br>M3/C3 |              |           |                                                                   |
| 1.194           | 0.993        | 1.023        | 0.980        | 1.040        | 0.741        | 0.812        | 1.234        | 0.939        | 0.817         | 1.028         | 0.961         | H0YEH1       | PICALM    | Phosphatidylinositol-binding clathrin assembly protein (Fragment) |
| 1.027           | 1.017        | 0.998        | 1.000        | 1.015        | 0.995        | 0.992        | 1.093        | 0.984        | 0.968         | 0.967         | 0.967         | Q13492       | PICALM    | Phosphatidylinositol-binding clathrin assembly protein            |
|                 |              |              | 0.909        | 0.721        | 0.974        |              |              |              | 1.095         | 0.820         | 1.203         | Q7Z7B1       | PIGW      | Phosphatidylinositol-glycan biosynthesis class W protein          |
| 0.986           | 0.976        | 0.989        | 0.995        | 0.891        | 0.965        | 1.020        | 0.981        | 0.980        | 1.034         | 0.956         | 1.056         | Q9UG56       | PISD      | Phosphatidylserine decarboxylase proenzyme, mitochondrial         |
| 0.903           | 0.995        | 0.984        | 0.886        | 0.912        | 1.074        | 0.908        | 0.763        | 1.045        | 1.084         | 0.986         | 1.126         | P48651       | PTDSS1    | Phosphatidylserine synthase 1                                     |
| 1.085           | 1.119        | 1.017        | 0.953        | 0.921        | 0.981        | 0.962        | 1.080        | 1.015        | 1.140         | 1.040         | 0.987         | Q9BVG9       | PTDSS2    | Phosphatidylserine synthase 2                                     |
| 1.186           | 1.073        | 1.139        | 0.979        | 0.929        | 1.152        | 0.907        | 1.006        | 1.107        | 1.111         | 1.101         | 1.160         | H0YM31       | PCK2      | Phosphoenolpyruvate carboxykinase [GTP], mitochondrial            |
| 1.016           | 0.992        | 1.013        | 1.017        | 1.020        | 1.015        | 1.008        | 0.997        | 1.040        | 1.000         | 0.982         | 1.008         | Q16822       | PCK2      | Phosphoenolpyruvate carboxykinase [GTP], mitochondrial            |
| 1.018           | 0.991        | 0.994        | 1.028        | 0.987        | 1.009        | 1.026        | 1.013        | 1.014        | 1.049         | 1.000         | 1.056         | Q6VY07       | PACS1     | Phosphofurin acidic cluster sorting protein 1                     |
| 1.021           | 1.009        | 1.028        | 1.006        | 0.993        | 1.009        | 0.979        | 1.013        | 0.990        | 1.002         | 0.966         | 0.999         | P36871       | PGM1      | Phosphoglucomutase-1                                              |
| 1.003           | 0.996        | 0.994        | 1.028        | 0.974        | 1.016        | 0.990        | 1.031        | 0.993        | 1.014         | 1.012         | 1.000         | Q96G03       | PGM2      | Phosphoglucomutase-2                                              |
| 0.983           | 0.980        | 1.063        | 0.923        | 0.957        | 1.020        | 0.946        | 1.004        | 0.996        | 0.949         | 1.001         | 0.966         | Q15124       | PGM5      | Phosphoglucomutase-like protein 5                                 |
| 1.006           | 1.005        | 0.982        | 0.997        | 1.036        | 1.003        | 0.968        | 1.004        | 1.000        | 0.923         | 0.999         | 0.904         | P00558       | PGK1      | Phosphoglycerate kinase 1                                         |
| 0.982           | 0.999        | 1.020        | 0.960        | 0.991        | 1.086        | 0.947        | 0.916        | 1.021        | 1.063         | 0.959         | 1.018         | P07205       | PGK2      | Phosphoglycerate kinase 2                                         |
| 0.985           | 0.984        | 1.000        | 0.975        | 1.084        | 0.985        | 0.937        | 0.858        | 0.989        | 0.961         | 0.998         | 0.988         | P18669       | PGAM1     | Phosphoglycerate mutase 1                                         |
| 1.009           | 1.006        | 1.037        | 1.015        | 0.916        | 1.074        | 0.991        | 0.988        | 1.000        | 0.966         | 0.995         | 1.013         | Q99570       | PIK3R4    | Phosphoinositide 3-kinase regulatory subunit 4                    |
|                 |              |              |              |              |              |              |              |              | 1.040         | 0.962         | 1.025         | Q53H76       | PLA1A     | Phospholipase A1 member A                                         |
| 0.984           | 0.995        | 1.013        | 1.009        | 1.015        | 0.995        | 1.014        | 1.003        | 1.000        | 0.994         | 0.996         | 1.002         | Q9Y263       | PLAA      | Phospholipase A-2-activating protein                              |
|                 |              |              | 0.939        | 0.881        | 0.967        |              |              |              |               |               |               | Q6P1J6       | PLB1      | Phospholipase B1, membrane-associated                             |
| 1.113           | 1.092        | 1.102        | 1.036        | 0.927        | 1.006        | 1.078        | 1.095        | 1.031        | 1.031         | 0.996         | 1.078         | Q13393       | PLD1      | Phospholipase D1                                                  |
| 0.990           | 0.984        | 0.999        | 0.966        | 0.902        | 1.024        | 0.995        | 1.050        | 1.036        | 1.027         | 0.944         | 1.072         | O14939       | PLD2      | Phospholipase D2                                                  |
| 1.019           | 1.068        | 1.061        | 1.111        | 1.117        | 1.178        | 1.065        | 1.145        | 1.093        | 1.071         | 0.982         | 1.116         | Q8IV08       | PLD3      | Phospholipase D3                                                  |
|                 |              |              |              |              |              | 1.016        | 0.993        | 1.108        | 0.992         | 0.872         | 1.001         | Q8NEL9       | DDHD1     | Phospholipase DDHD1                                               |
| 0.997           | 0.987        | 1.027        | 0.992        | 1.004        | 0.978        | 1.018        | 1.043        | 1.027        | 0.980         | 1.075         | 1.019         | O94830       | DDHD2     | Phospholipase DDHD2                                               |
| 0.896           | 0.981        | 0.909        | 1.139        | 0.824        | 0.905        | 1.084        | 1.851        | 0.946        | 1.382         | 1.250         | 1.297         | O14494       | PLPP1     | Phospholipid phosphatase 1                                        |
| 0.932           | 1.021        | 0.969        | 1.004        | 0.889        | 1.147        | 1.050        | 0.992        | 1.109        | 1.056         | 1.050         | 1.081         | O15162       | PLSCR1    | Phospholipid scramblase 1                                         |
| 0.990           | 0.815        | 1.069        | 1.133        | 0.933        | 1.230        | 1.238        | 0.996        | 0.858        | 1.115         | 1.085         | 1.169         | Q9NRY6       | PLSCR3    | Phospholipid scramblase 3                                         |
| 1.011           | 0.961        | 1.032        | 0.978        | 0.875        | 1.046        | 1.007        | 0.964        | 1.041        | 1.014         | 1.025         | 1.076         | Q8NB49       | ATP11C    | Phospholipid-transporting ATPase IG                               |
| 0.993           | 1.042        | 0.877        | 0.882        | 0.946        | 1.107        | 0.925        | 1.049        | 1.207        | 1.097         | 1.069         | 1.025         | E9PEJ6       | ATP11A    | Phospholipid-transporting ATPase                                  |

| Abundance Ratio |              |              |              |              |              |              |              |              |               |               |               | Accession ID | Gene name | Protein Description                                                      |
|-----------------|--------------|--------------|--------------|--------------|--------------|--------------|--------------|--------------|---------------|---------------|---------------|--------------|-----------|--------------------------------------------------------------------------|
| 1 d<br>M1/C1    | 1 d<br>M2/C2 | 1 d<br>M3/C3 | 4 d<br>M1/C1 | 4 d<br>M2/C2 | 4 d<br>M3/C3 | 7 d<br>M1/C1 | 7 d<br>M2/C2 | 7 d<br>M3/C3 | 10 d<br>M1/C1 | 10 d<br>M2/C2 | 10 d<br>M3/C3 |              |           |                                                                          |
| 1.121           | 0.925        | 1.056        | 1.048        | 0.945        | 1.023        | 0.984        | 1.065        | 1.026        | 0.959         | 1.000         | 0.939         | Q9H008       | LHPP      | Phospholysine phosphohistidine inorganic pyrophosphate phosphatase       |
| 0.923           | 1.009        | 0.992        | 0.941        | 0.962        | 1.076        | 0.992        | 1.006        | 1.052        | 0.982         | 0.989         | 1.020         | Q92871       | PMM1      | Phosphomannomutase 1                                                     |
| 0.984           | 0.988        | 0.982        | 0.999        | 0.950        | 1.004        | 0.996        | 1.041        | 0.988        | 1.008         | 0.987         | 0.937         | O15305       | PMM2      | Phosphomannomutase 2                                                     |
| 1.013           | 1.004        | 1.011        | 1.014        | 0.986        | 1.024        | 1.018        | 1.041        | 1.007        | 1.026         | 0.983         | 1.012         | Q15126       | PMVK      | Phosphomevalonate kinase                                                 |
| 1.003           | 0.991        | 0.989        | 0.990        | 0.945        | 0.997        | 0.992        | 1.026        | 0.975        | 0.953         | 0.951         | 0.999         | Q9HAB8       | PPCS      | Phosphopantothenate--cysteine ligase                                     |
| 0.923           | 1.013        | 1.048        | 1.001        | 0.932        | 1.014        | 1.017        | 1.103        | 1.098        | 0.958         | 0.990         | 1.051         | Q96CD2       | PPCDC     | Phosphopantothenoylcysteine decarboxylase                                |
| 1.013           | 1.011        | 1.023        | 0.985        | 0.953        | 0.999        | 0.969        | 1.054        | 1.010        | 0.976         | 0.972         | 1.011         | O60256       | PRPSAP2   | Phosphoribosyl pyrophosphate synthase-associated protein 2               |
| 0.997           | 0.987        | 1.030        | 1.000        | 1.016        | 1.013        | 1.011        | 0.957        | 1.016        | 1.029         | 1.003         | 1.030         | O15067       | PFAS      | Phosphoribosylformylglycinamide synthase                                 |
| 1.094           | 0.978        | 1.053        | 1.009        | 0.911        | 1.053        | 1.010        | 1.005        | 1.029        | 0.993         | 0.905         | 1.109         | Q9NRG1       | PRTFDC1   | Phosphoribosyltransferase domain-containing protein 1                    |
| 1.011           | 1.006        | 1.029        | 0.982        | 0.950        | 1.124        | 0.980        | 1.112        | 0.943        | 1.070         | 0.978         | 0.980         | J3KNN3       | PHKG2     | Phosphorylase b kinase gamma catalytic chain, liver/testis isoform       |
|                 |              |              | 0.992        | 0.891        | 1.058        | 0.900        | 1.001        | 1.134        |               |               |               | P46019       | PHKA2     | Phosphorylase b kinase regulatory subunit alpha, liver isoform           |
| 0.946           | 1.024        | 0.963        | 0.947        | 1.055        | 1.045        | 1.029        | 1.108        | 1.006        | 0.990         | 1.038         | 1.051         | A6NMN0       | PHKA1     | Phosphorylase b kinase regulatory subunit alpha, skeletal muscle isoform |
| 1.031           | 1.022        | 1.055        | 1.051        | 1.009        | 1.025        | 1.041        | 1.004        | 1.030        | 0.983         | 1.042         | 1.012         | Q9H814       | PHAX      | Phosphorylated adapter RNA export protein                                |
| 1.037           | 1.002        | 1.046        | 1.015        | 1.046        | 1.115        | 0.957        | 1.176        | 1.053        | 1.038         | 1.015         | 1.026         | Q9H4Z3       | PCIF1     | Phosphorylated CTD-interacting factor 1                                  |
| 0.966           | 0.991        | 0.974        | 0.969        | 1.003        | 0.938        | 0.991        | 0.983        | 0.965        | 0.952         | 0.969         | 0.970         | Q9Y617       | PSAT1     | Phosphoserine aminotransferase                                           |
| 1.012           | 1.003        | 0.988        | 0.997        | 0.975        | 0.984        | 1.019        | 1.029        | 0.975        | 1.032         | 0.962         | 1.030         | P78330       | PSPH      | Phosphoserine phosphatase                                                |
| 1.000           | 0.987        | 0.997        | 0.957        | 0.948        | 1.017        | 1.023        | 1.045        | 0.987        | 0.983         | 0.956         | 1.021         | Q96BW5       | PTER      | Phosphotriesterase-related protein                                       |
| 0.993           | 0.993        | 1.003        | 0.999        | 1.009        | 1.021        | 1.023        | 1.000        | 1.026        | 1.052         | 1.026         | 1.077         | Q6NYC8       | PPP1R18   | Phostensin                                                               |
| 1.010           | 0.986        | 1.046        | 1.016        | 0.982        | 1.045        | 1.018        | 0.990        | 0.947        | 0.992         | 0.973         | 1.003         | O14832       | PHYH      | Phytanoyl-CoA dioxygenase, peroxisomal                                   |
| 1.010           | 1.008        | 0.977        | 1.000        | 0.922        | 1.068        | 1.082        | 1.030        | 1.035        | 1.136         | 1.017         | 1.126         | Q92508       | PIEZO1    | Piezo-type mechanosensitive ion channel component 1                      |
| 0.994           | 0.986        | 1.038        | 0.981        | 0.974        | 1.004        | 0.990        | 1.040        | 0.983        | 0.956         | 0.944         | 1.028         | Q9NWS0       | PIH1D1    | PIH1 domain-containing protein 1                                         |
| 0.970           | 0.996        | 1.193        | 0.954        | 1.007        | 0.957        | 0.961        | 0.994        | 1.093        | 1.192         | 1.010         | 1.472         | Q96BK5       | PINX1     | PIN2/TERF1-interacting telomerase inhibitor 1                            |
| 0.985           | 0.993        | 0.997        | 0.975        | 0.957        | 0.996        | 0.988        | 0.984        | 0.963        | 0.998         | 1.027         | 1.031         | Q9H307       | PNN       | Pinin                                                                    |
| 0.971           | 0.978        | 1.022        | 0.970        | 1.018        | 1.046        | 1.008        | 1.056        | 1.063        | 1.009         | 1.022         | 1.043         | O00625       | PIR       | Pirin                                                                    |
| 1.004           | 0.986        | 1.051        | 0.989        | 1.005        | 1.029        | 0.989        | 1.019        | 1.028        | 0.958         | 1.019         | 1.020         | Q9GZP4       | PITHD1    | PITH domain-containing protein 1                                         |
| 0.935           | 1.028        | 1.099        | 1.070        | 0.949        | 1.094        | 1.137        | 0.959        | 1.025        | 1.328         | 1.259         | 1.287         | P53801       | PTTG1IP   | Pituitary tumor-transforming gene 1 protein-interacting protein          |
| 1.059           | 1.016        | 0.999        | 1.046        | 0.995        | 1.000        | 1.079        | 1.020        | 1.018        | 1.080         | 0.983         | 1.069         | A0A0D9SF60   | PKP4      | Plakophilin-4                                                            |
| 1.046           | 0.977        | 1.065        | 1.018        | 1.028        | 1.044        | 1.062        | 1.122        | 1.050        | 1.094         | 1.005         | 1.067         | Q98TY2       | FUCA2     | Plasma alpha-L-fucosidase                                                |

| Abundance Ratio |              |              |              |              |              |              |              |              |               |               |               | Accession ID | Gene name | Protein Description                                                |
|-----------------|--------------|--------------|--------------|--------------|--------------|--------------|--------------|--------------|---------------|---------------|---------------|--------------|-----------|--------------------------------------------------------------------|
| 1 d<br>M1/C1    | 1 d<br>M2/C2 | 1 d<br>M3/C3 | 4 d<br>M1/C1 | 4 d<br>M2/C2 | 4 d<br>M3/C3 | 7 d<br>M1/C1 | 7 d<br>M2/C2 | 7 d<br>M3/C3 | 10 d<br>M1/C1 | 10 d<br>M2/C2 | 10 d<br>M3/C3 |              |           |                                                                    |
| 1.017           | 0.976        | 0.997        | 1.025        | 0.961        | 1.074        | 1.046        | 1.059        | 1.043        | 1.057         | 1.060         | 1.096         | P20020       | ATP2B1    | Plasma membrane calcium-transporting ATPase 1                      |
|                 |              |              | 0.837        | 0.781        | 1.212        | 1.150        | 1.140        | 1.125        | 0.860         | 0.980         | 1.063         | P23634       | ATP2B4    | Plasma membrane calcium-transporting ATPase 4                      |
| 1.085           | 1.026        | 1.048        | 1.052        | 1.017        | 1.090        | 1.069        | 1.230        | 0.976        | 0.979         | 1.074         | 1.027         | P05121       | SERPINE1  | Plasminogen activator inhibitor 1                                  |
| 1.006           | 0.997        | 0.977        | 0.981        | 0.961        | 0.986        | 1.012        | 0.975        | 0.970        | 1.050         | 1.028         | 1.027         | Q8NC51       | SERBP1    | Plasminogen activator inhibitor 1 RNA-binding protein              |
| 0.976           | 0.914        | 1.065        | 1.058        | 0.846        | 1.070        | 1.048        | 1.092        | 1.015        | 1.018         | 1.056         | 1.014         | Q9HBL7       | PLGRKT    | Plasminogen receptor (KT)                                          |
| 0.651           | 1.016        | 0.703        | 0.983        | 0.822        | 1.117        | 1.323        | 0.687        | 0.822        | 1.339         | 1.049         | 1.008         | Q9Y342       | PLLP      | Plasmolipin                                                        |
| 0.985           | 0.997        | 0.991        | 0.975        | 0.965        | 0.973        | 0.997        | 1.013        | 1.021        | 0.972         | 0.944         | 1.029         | Q14651       | PLS1      | Plastin-1                                                          |
| 1.000           | 0.998        | 0.991        | 1.006        | 1.061        | 0.992        | 1.009        | 1.002        | 1.013        | 0.968         | 0.954         | 0.977         | P13797       | PLS3      | Plastin-3                                                          |
| 0.938           | 0.958        | 0.954        | 0.984        | 0.862        | 0.941        | 1.011        | 1.219        | 1.044        | 1.006         | 1.004         | 0.989         | Q99487       | PAFAH2    | Platelet-activating factor acetylhydrolase 2, cytoplasmic          |
| 1.011           | 0.982        | 1.000        | 1.019        | 1.084        | 0.983        | 1.000        | 0.991        | 1.006        | 1.003         | 0.986         | 0.972         | P43034       | PAFAH1B1  | Platelet-activating factor acetylhydrolase IB subunit alpha        |
| 1.032           | 1.048        | 0.992        | 0.939        | 0.960        | 1.082        | 0.920        | 1.010        | 1.011        | 0.922         | 1.000         | 0.944         | P68402       | PAFAH1B2  | Platelet-activating factor acetylhydrolase IB subunit beta         |
| 1.034           | 0.984        | 1.036        | 1.002        | 1.094        | 0.991        | 0.985        | 0.932        | 1.022        | 1.040         | 0.976         | 1.015         | Q15102       | PAFAH1B3  | Platelet-activating factor acetylhydrolase IB subunit gamma        |
|                 |              |              |              |              |              |              |              |              | 0.870         | 1.149         | 0.995         | P04085       | PDGFA     | Platelet-derived growth factor subunit A                           |
| 0.679           | 0.843        | 1.042        | 0.576        | 0.899        | 0.686        | 0.553        | 0.286        | 0.865        | 0.930         | 0.926         | 0.967         | P01127       | PDGFB     | Platelet-derived growth factor subunit B                           |
| 1.015           | 1.043        | 1.130        | 0.925        | 0.901        | 0.992        | 0.925        | 0.975        | 1.028        | 1.054         | 1.070         | 1.108         | Q5RGS4       | PLEKHA1   | Pleckstrin homology domain-containing family A member 1            |
| 0.952           | 0.995        | 1.018        | 1.030        | 1.001        | 0.965        | 0.995        | 1.156        | 1.092        | 0.988         | 0.984         | 0.962         | Q9HB20       | PLEKHA3   | Pleckstrin homology domain-containing family A member 3            |
|                 |              |              |              |              |              | 0.854        | 0.952        | 1.246        | 1.026         | 1.048         | 0.832         | J3KQS5       | PLEKHA8   | Pleckstrin homology domain-containing family A member 8 (Fragment) |
| 0.904           | 0.943        | 1.081        | 0.958        | 0.920        | 1.068        | 0.903        | 0.886        | 0.988        | 0.988         | 0.924         | 1.039         | Q96S99       | PLEKHF1   | Pleckstrin homology domain-containing family F member 1            |
| 0.988           | 1.001        | 1.008        | 0.975        | 0.937        | 0.998        | 1.037        | 0.946        | 1.069        | 0.947         | 1.017         | 1.005         | Q9H8W4       | PLEKHF2   | Pleckstrin homology domain-containing family F member 2            |
| 0.981           | 1.004        | 1.046        | 0.958        | 0.937        | 1.025        | 0.929        | 0.814        | 0.921        | 0.927         | 0.970         | 0.956         | Q9H7P9       | PLEKHG2   | Pleckstrin homology domain-containing family G member 2            |
| 7.619           | 0.118        | 0.889        | 7.237        | 0.112        | 0.672        | 1.075        | 1.052        | 0.906        |               |               |               | A1L390       | PLEKHG3   | Pleckstrin homology domain-containing family G member 3            |
|                 |              |              |              |              |              | 0.933        | 1.339        | 0.912        |               |               |               | Q7Z736       | PLEKHH3   | Pleckstrin homology domain-containing family H member 3            |
|                 |              |              | 0.901        | 1.079        | 0.899        | 1.559        | 1.044        | 0.933        | 0.899         | 0.990         | 0.981         | Q9Y4G2       | PLEKHM1   | Pleckstrin homology domain-containing family M member 1            |

| Abundance Ratio |              |              |              |              |              |              |              |              |               |               |               | Accession ID | Gene name | Protein Description                                     |
|-----------------|--------------|--------------|--------------|--------------|--------------|--------------|--------------|--------------|---------------|---------------|---------------|--------------|-----------|---------------------------------------------------------|
| 1 d<br>M1/C1    | 1 d<br>M2/C2 | 1 d<br>M3/C3 | 4 d<br>M1/C1 | 4 d<br>M2/C2 | 4 d<br>M3/C3 | 7 d<br>M1/C1 | 7 d<br>M2/C2 | 7 d<br>M3/C3 | 10 d<br>M1/C1 | 10 d<br>M2/C2 | 10 d<br>M3/C3 |              |           |                                                         |
| 1.046           | 0.969        | 1.005        | 0.997        | 0.964        | 1.062        | 1.005        | 1.164        | 1.065        | 1.061         | 1.022         | 1.072         | Q8IWE5       | PLEKHM2   | Pleckstrin homology domain-containing family M member 2 |
|                 |              |              | 1.073        | 1.034        | 1.050        | 1.162        | 1.042        | 1.111        |               |               |               | Q494U1       | PLEKHN1   | Pleckstrin homology domain-containing family N member 1 |
| 0.972           | 1.107        | 1.060        | 0.928        | 0.994        | 1.008        | 1.039        | 0.968        | 0.989        | 0.919         | 0.990         | 1.057         | Q8TD55       | PLEKHO2   | Pleckstrin homology domain-containing family O member 2 |
| 1.013           | 1.007        | 1.007        | 1.019        | 0.994        | 0.983        | 1.001        | 1.084        | 0.999        | 1.012         | 0.922         | 0.988         | Q8WV24       | PHLDA1    | Pleckstrin homology-like domain family A member 1       |
| 1.019           | 1.053        | 1.022        | 1.087        | 0.934        | 0.979        | 1.087        | 1.149        | 1.013        | 0.932         | 1.107         | 1.098         | Q53GA4       | PHLDA2    | Pleckstrin homology-like domain family A member 2       |
| 1.060           | 1.064        | 1.009        | 0.988        | 0.923        | 1.002        | 0.986        | 0.954        | 1.001        | 1.089         | 0.931         | 1.064         | Q86SQ0       | PHLDB2    | Pleckstrin homology-like domain family B member 2       |
| 1.059           | 0.968        | 0.992        | 1.038        | 0.930        | 0.993        | 1.045        | 1.175        | 0.985        | 0.957         | 0.865         | 1.077         | Q9NYT0       | PLEK2     | Pleckstrin-2                                            |
| 0.965           | 1.000        | 1.009        | 0.981        | 0.978        | 0.997        | 0.975        | 0.977        | 0.996        | 0.986         | 1.003         | 0.997         | Q15149       | PLEC      | Plectin                                                 |
| 0.984           | 0.995        | 1.004        | 0.993        | 1.015        | 1.030        | 1.021        | 1.030        | 0.987        | 1.014         | 1.007         | 1.024         | O43660       | PLRG1     | Pleiotropic regulator 1                                 |
| 1.001           | 1.058        | 1.052        | 0.977        | 0.955        | 1.045        | 1.018        | 1.014        | 0.992        | 1.046         | 1.066         | 1.056         | Q9UIW2       | PLXNA1    | Plexin-A1                                               |
| 0.996           | 0.915        | 0.952        | 1.032        | 1.060        | 1.027        | 1.219        | 0.843        | 1.007        | 1.337         | 0.860         | 1.089         | O43157       | PLXNB1    | Plexin-B1                                               |
| 1.004           | 0.988        | 1.031        | 1.035        | 0.927        | 1.042        | 1.055        | 1.040        | 1.027        | 1.044         | 0.985         | 1.046         | O15031       | PLXNB2    | Plexin-B2                                               |
| 1.055           | 1.017        | 1.014        | 0.990        | 0.899        | 0.920        | 0.938        | 1.090        | 0.921        | 0.931         | 0.976         | 0.980         | P54277       | PMS1      | PMS1 protein homolog 1                                  |
| 0.979           | 0.958        | 0.868        | 0.811        | 1.028        | 1.187        | 1.106        | 0.798        | 1.099        |               |               |               | Q8TC44       | POC1B     | POC1 centriolar protein homolog B                       |
| 0.968           | 1.027        | 0.994        | 0.969        | 0.949        | 1.000        | 1.006        | 1.110        | 0.990        | 0.959         | 0.859         | 1.044         | O00592       | PODXL     | Podocalyxin                                             |
| 0.931           | 1.019        | 1.125        | 0.961        | 0.912        | 1.000        | 0.967        | 0.908        | 1.043        | 0.952         | 1.053         | 1.065         | Q9P215       | POGK      | Pogo transposable element with KRAB domain              |
| 1.027           | 1.010        | 1.020        | 0.977        | 0.941        | 0.981        | 0.992        | 1.014        | 0.983        | 1.012         | 1.010         | 1.018         | Q7Z3K3       | POGZ      | Pogo transposable element with ZNF domain               |
| 0.874           | 0.968        | 0.977        | 1.007        | 0.934        | 0.989        | 1.057        | 1.121        | 0.961        | 1.107         | 1.048         | 1.063         | A0A0C4DG49   | PVR       | Poliovirus receptor                                     |
| 0.987           | 1.014        | 0.997        | 1.002        | 1.056        | 0.989        | 1.002        | 0.957        | 0.994        | 1.001         | 0.976         | 1.001         | P09874       | PARP1     | Poly [ADP-ribose] polymerase 1                          |
| 1.040           | 1.069        | 1.035        | 1.003        | 0.962        | 0.991        | 1.003        | 1.064        | 0.986        | 1.021         | 0.998         | 1.050         | Q9H0J9       | PARP12    | Poly [ADP-ribose] polymerase 12                         |
| 0.994           | 0.998        | 1.025        | 0.918        | 0.929        | 1.003        | 0.918        | 1.026        | 1.003        | 1.065         | 1.028         | 1.032         | Q460N5       | PARP14    | Poly [ADP-ribose] polymerase 14                         |
| 0.972           | 0.919        | 0.967        | 1.031        | 0.977        | 0.984        | 1.007        | 1.060        | 0.928        | 0.892         | 1.017         | 1.001         | Q9UGN5       | PARP2     | Poly [ADP-ribose] polymerase 2                          |
| 1.028           | 1.022        | 1.028        | 1.016        | 0.962        | 1.010        | 1.026        | 1.006        | 1.027        | 1.025         | 0.966         | 1.058         | Q9UUK3       | PARP4     | Poly [ADP-ribose] polymerase 4                          |
| 1.009           | 0.968        | 1.111        | 1.055        | 0.996        | 0.947        | 1.042        | 1.117        | 0.987        | 1.044         | 1.040         | 1.002         | Q8IXQ6       | PARP9     | Poly [ADP-ribose] polymerase 9                          |
| 1.061           | 0.995        | 1.037        | 0.981        | 0.898        | 0.958        | 0.979        | 0.984        | 0.978        | 0.996         | 0.950         | 1.003         | E9PNI7       | PARP10    | Poly [ADP-ribose] polymerase                            |
| 1.021           | 0.968        | 1.025        | 0.966        | 0.956        | 1.020        | 0.987        | 1.082        | 1.048        | 0.948         | 0.955         | 1.039         | P51003       | PAPOLA    | Poly(A) polymerase alpha                                |
| 0.978           | 0.961        | 0.967        | 0.993        | 0.920        | 1.086        | 1.031        | 0.909        | 0.986        | 1.128         | 1.030         | 1.115         | Q9BWT3       | PAPOLG    | Poly(A) polymerase gamma                                |
| 1.007           | 0.886        | 1.065        | 0.820        | 0.944        | 0.912        | 1.079        | 1.127        | 1.024        | 0.988         | 1.235         | 1.007         | Q6PIY7       | PAPD4     | Poly(A) RNA polymerase GLD2                             |
| 0.959           | 0.991        | 0.992        | 1.024        | 0.976        | 1.071        | 1.072        | 0.966        | 1.031        | 1.106         | 1.069         | 1.078         | Q9NVV4       | MTPAP     | Poly(A) RNA polymerase, mitochondrial                   |
| 0.980           | 0.992        | 0.983        | 0.996        | 0.974        | 0.995        | 0.970        | 1.028        | 1.002        | 1.006         | 1.004         | 1.034         | O95453       | PARN      | Poly(A)-specific ribonuclease PARN                      |

| Abundance Ratio |              |              |              |              |              |              |              |              |               |               |               | Accession ID | Gene name | Protein Description                                 |
|-----------------|--------------|--------------|--------------|--------------|--------------|--------------|--------------|--------------|---------------|---------------|---------------|--------------|-----------|-----------------------------------------------------|
| 1 d<br>M1/C1    | 1 d<br>M2/C2 | 1 d<br>M3/C3 | 4 d<br>M1/C1 | 4 d<br>M2/C2 | 4 d<br>M3/C3 | 7 d<br>M1/C1 | 7 d<br>M2/C2 | 7 d<br>M3/C3 | 10 d<br>M1/C1 | 10 d<br>M2/C2 | 10 d<br>M3/C3 |              |           |                                                     |
| 0.986           | 1.010        | 0.985        | 1.000        | 0.966        | 1.011        | 0.998        | 1.069        | 1.031        | 1.007         | 0.990         | 0.995         | Q9NX46       | ADPRHL2   | Poly(ADP-ribose) glycohydrolase ARH3                |
| 1.072           | 1.027        | 1.042        | 1.019        | 0.993        | 1.020        | 1.016        | 1.046        | 1.063        | 0.983         | 0.996         | 1.010         | Q86W56       | PARG      | Poly(ADP-ribose) glycohydrolase                     |
| 0.961           | 0.999        | 0.964        | 0.989        | 1.024        | 0.986        | 1.029        | 0.965        | 0.992        | 0.997         | 1.015         | 0.994         | Q15365       | PCBP1     | Poly(rC)-binding protein 1                          |
|                 |              |              |              |              |              |              |              |              | 1.182         | 1.114         | 6.949         | F8W0G4       | PCBP2     | Poly(rC)-binding protein 2 (Fragment)               |
| 0.932           | 0.713        | 0.919        | 1.025        | 0.967        | 0.978        | 1.182        | 1.161        | 1.011        | 0.993         | 1.005         | 1.017         | Q15366       | PCBP2     | Poly(rC)-binding protein 2                          |
| 0.946           | 0.958        | 1.170        | 0.899        | 0.901        | 1.046        | 1.019        | 0.858        | 0.946        | 1.139         | 0.996         | 1.139         | P57723       | PCBP4     | Poly(rC)-binding protein 4                          |
| 1.043           | 1.010        | 0.950        | 0.962        | 0.921        | 1.028        | 1.088        | 1.281        | 1.037        | 0.904         | 0.923         | 0.985         | HOYAR2       | PABPC1    | Polyadenylate-binding protein 1 (Fragment)          |
| 0.858           | 0.826        | 0.946        | 0.794        | 0.893        | 1.194        | 0.986        | 1.083        | 1.152        | 0.957         | 1.037         | 1.108         | E5RJM8       | PABPC1    | Polyadenylate-binding protein 1 (Fragment)          |
| 1.006           | 1.020        | 0.980        | 1.016        | 1.067        | 0.970        | 1.005        | 1.010        | 1.018        | 0.982         | 1.035         | 0.976         | P11940       | PABPC1    | Polyadenylate-binding protein 1                     |
| 0.903           | 1.046        | 1.210        | 0.959        | 0.944        | 0.787        | 1.007        | 1.059        | 1.100        | 0.799         | 1.005         | 1.209         | Q86U42       | PABPN1    | Polyadenylate-binding protein 2                     |
| 1.028           | 0.980        | 1.005        | 0.948        | 0.998        | 1.005        | 0.971        | 0.948        | 1.037        | 1.023         | 1.009         | 1.042         | Q9H074       | PAIP1     | Polyadenylate-binding protein-interacting protein 1 |
| 1.038           | 0.944        | 1.005        | 0.989        | 0.994        | 1.057        | 0.941        | 0.873        | 1.037        | 1.100         | 0.924         | 1.166         | Q9BPZ3       | PAIP2     | Polyadenylate-binding protein-interacting protein 2 |
| 1.069           | 1.036        | 1.021        | 1.040        | 0.978        | 0.994        | 0.979        | 0.965        | 0.977        | 0.955         | 0.896         | 0.991         | Q6P1K2       | PMF1      | Polyamine-modulated factor 1                        |
| 1.031           | 0.982        | 1.009        | 0.965        | 0.933        | 1.021        | 0.922        | 1.086        | 0.895        | 0.948         | 0.956         | 1.035         | P35227       | PCGF2     | Polycomb group RING finger protein 2                |
|                 |              |              | 0.781        | 0.873        | 1.189        |              |              |              | 0.934         | 0.904         | 1.030         | Q86SE9       | PCGF5     | Polycomb group RING finger protein 5                |
|                 |              |              |              |              |              |              |              |              | 0.908         | 0.904         | 1.139         | Q9BYE7       | PCGF6     | Polycomb group RING finger protein 6                |
| 1.055           | 1.030        | 0.983        | 1.015        | 1.006        | 1.015        | 1.044        | 1.065        | 0.961        | 1.135         | 0.973         | 1.016         | Q15022       | SUZ12     | Polycomb protein SUZ12                              |
| 0.986           | 0.921        | 1.205        | 0.959        | 0.953        | 1.110        | 0.918        | 0.881        | 1.046        | 1.048         | 1.065         | 1.006         | Q13563       | PKD2      | Polycystin-2                                        |
| 1.005           | 0.979        | 0.986        | 0.976        | 0.970        | 0.965        | 0.950        | 1.009        | 0.969        | 0.962         | 0.978         | 0.952         | O60828       | PQBP1     | Polyglutamine-binding protein 1                     |
| 1.118           | 1.076        | 1.009        | 0.920        | 1.014        | 0.853        | 1.124        | 1.044        | 0.977        | 0.821         | 1.194         | 1.110         | P78364       | PHC1      | Polyhomeotic-like protein 1                         |
| 1.005           | 1.011        | 1.043        | 1.000        | 0.975        | 1.059        | 0.975        | 1.057        | 1.040        | 0.999         | 1.009         | 1.015         | Q9Y2S7       | POLDIP2   | Polymerase delta-interacting protein 2              |
| 1.013           | 0.983        | 1.004        | 1.000        | 0.979        | 0.998        | 1.020        | 1.004        | 0.973        | 1.032         | 1.015         | 1.033         | Q9BY77       | POLDIP3   | Polymerase delta-interacting protein 3              |
| 0.923           | 0.994        | 0.982        | 0.954        | 0.967        | 0.987        | 0.988        | 0.994        | 0.999        | 0.975         | 0.917         | 1.025         | Q6NZI2       | PTRF      | Polymerase I and transcript release factor          |
| 1.022           | 1.017        | 1.008        | 1.002        | 0.942        | 0.956        | 0.991        | 1.044        | 0.996        | 0.973         | 1.010         | 0.967         | Q5SY16       | NOL9      | Polynucleotide 5'-hydroxyl-kinase NOL9              |
| 0.894           | 0.900        | 0.907        | 0.859        | 0.770        | 0.822        | 0.973        | 1.084        | 0.910        | 1.057         | 1.019         | 1.038         | Q10472       | GALNT1    | Polypeptide N-acetylgalactosaminyltransferase 1     |
| 0.979           | 1.008        | 1.050        | 1.023        | 0.928        | 1.093        | 1.048        | 1.114        | 1.007        | 0.995         | 1.121         | 0.990         | Q8NCW6       | GALNT11   | Polypeptide N-acetylgalactosaminyltransferase 11    |
| 0.976           | 0.988        | 1.099        | 0.960        | 0.970        | 1.056        | 1.043        | 0.968        | 1.126        | 1.042         | 0.973         | 1.087         | Q96FL9       | GALNT14   | Polypeptide N-acetylgalactosaminyltransferase 14    |
| 0.976           | 1.013        | 1.004        | 1.050        | 0.962        | 1.000        | 1.042        | 1.051        | 1.034        | 1.069         | 0.993         | 1.059         | Q10471       | GALNT2    | Polypeptide N-acetylgalactosaminyltransferase 2     |
| 0.992           | 0.890        | 1.010        | 0.970        | 0.912        | 0.957        | 1.041        | 1.072        | 0.957        | 1.151         | 1.010         | 0.985         | Q8N4A0       | GALNT4    | Polypeptide N-acetylgalactosaminyltransferase 4     |
| 0.741           | 0.884        | 0.922        | 0.921        | 1.144        | 1.145        | 1.002        | 0.925        | 0.793        |               |               |               | J3KNN1       | GALNT9    | Polypeptide N-acetylgalactosaminyltransferase       |
| 0.985           | 1.019        | 0.947        | 0.998        | 0.961        | 1.012        | 0.924        | 1.105        | 0.922        | 1.026         | 0.965         | 1.029         | Q92562       | FIG4      | Polyphosphoinositide phosphatase                    |



| Abundance Ratio |              |              |              |              |              |              |              |              |               |               |               | Accession ID | Gene name | Protein Description                                            |
|-----------------|--------------|--------------|--------------|--------------|--------------|--------------|--------------|--------------|---------------|---------------|---------------|--------------|-----------|----------------------------------------------------------------|
| 1 d<br>M1/C1    | 1 d<br>M2/C2 | 1 d<br>M3/C3 | 4 d<br>M1/C1 | 4 d<br>M2/C2 | 4 d<br>M3/C3 | 7 d<br>M1/C1 | 7 d<br>M2/C2 | 7 d<br>M3/C3 | 10 d<br>M1/C1 | 10 d<br>M2/C2 | 10 d<br>M3/C3 |              |           |                                                                |
|                 |              |              |              |              |              | 1.178        | 1.000        | 1.047        |               |               |               | Q9H8P0       | SRD5A3    | Polyprenol reductase                                           |
| 1.034           | 1.034        | 1.023        | 0.985        | 1.003        | 1.035        | 0.963        | 1.042        | 1.016        | 0.938         | 1.012         | 0.960         | A0A0U1RRM4   | PTBP1     | Polypyrimidine tract-binding protein 1                         |
| 1.056           | 0.980        | 1.022        | 1.042        | 0.979        | 0.993        | 1.012        | 0.996        | 1.002        | 0.981         | 1.077         | 0.985         | E9PL17       | CLP1      | Polyribonucleotide 5'-hydroxyl-kinase Clp1                     |
| 1.002           | 1.008        | 1.009        | 0.994        | 0.979        | 0.999        | 1.010        | 1.011        | 0.992        | 1.011         | 1.005         | 1.012         | Q8TCS8       | PNPT1     | Polyribonucleotide nucleotidyltransferase 1, mitochondrial     |
| 1.211           | 1.114        | 1.071        | 1.002        | 1.167        | 1.040        | 1.048        | 1.150        | 0.973        | 1.078         | 1.160         | 1.148         | F5H265       | UBC       | Polyubiquitin-C (Fragment)                                     |
| 1.050           | 0.995        | 1.019        | 1.019        | 0.910        | 1.006        | 1.007        | 1.026        | 0.994        | 0.996         | 0.990         | 1.018         | P08397       | HMBS      | Porphobilinogen deaminase                                      |
| 1.033           | 0.976        | 0.840        | 1.010        | 0.847        | 1.002        | 1.001        | 1.189        | 0.975        |               |               |               | Q9HB15       | KCNK12    | Potassium channel subfamily K member 12                        |
| 0.917           | 0.883        | 1.396        |              |              |              | 0.767        | 1.303        | 1.407        | 0.845         | 0.752         | 1.053         | A8MYU2       | KCNU1     | Potassium channel subfamily U member 1                         |
| 1.124           | 0.971        | 0.916        | 0.777        | 0.678        | 0.834        | 1.110        | 0.879        | 1.084        |               |               |               | Q14721       | KCNB1     | Potassium voltage-gated channel subfamily B member 1           |
| 0.832           | 0.946        | 0.983        | 1.072        | 1.077        | 1.086        | 0.958        | 1.040        | 1.110        |               |               |               | Q8TAE7       | KCNG3     | Potassium voltage-gated channel subfamily G member 3           |
|                 |              |              |              |              |              | 1.127        | 1.052        | 1.116        |               |               |               | Q8TDN1       | KCNG4     | Potassium voltage-gated channel subfamily G member 4           |
|                 |              |              |              |              |              |              |              |              | 0.890         | 0.934         | 0.973         | A5A3E0       | POTEF     | POTE ankyrin domain family member F                            |
| 0.962           | 1.031        | 0.983        |              |              |              | 0.954        | 0.963        | 0.894        | 0.954         | 1.020         | 1.022         | P0CG38       | POTEI     | POTE ankyrin domain family member I                            |
| 1.721           | 0.978        | 1.226        | 1.189        | 1.932        | 0.784        | 1.167        | 0.841        | 1.234        | 0.969         | 0.986         | 1.070         | P0CG39       | POTEJ     | POTE ankyrin domain family member J                            |
| 1.079           | 0.942        | 0.883        | 0.963        | 0.967        | 0.963        | 0.889        | 1.114        | 1.087        | 1.000         | 0.966         | 1.039         | Q9HBE1       | PATZ1     | POZ-, AT hook-, and zinc finger-containing protein 1           |
| 1.099           | 1.016        | 0.931        | 0.944        | 0.947        | 1.112        | 0.921        | 1.257        | 0.942        | 1.043         | 1.019         | 0.885         | Q8N755       | PQLC3     | PQ-loop repeat-containing protein 3                            |
|                 |              |              |              |              |              |              |              |              | 0.905         | 0.928         | 1.109         | Q9H4Q3       | PRDM13    | PR domain zinc finger protein 13                               |
| 1.066           | 1.111        | 1.075        | 0.955        | 0.946        | 1.037        | 1.146        | 1.144        | 0.994        |               |               |               | P57071       | PRDM15    | PR domain zinc finger protein 15                               |
| 0.983           | 0.985        | 0.992        | 0.991        | 0.918        | 1.017        | 1.022        | 1.074        | 1.053        | 1.015         | 0.987         | 1.057         | O60831       | PRAF2     | PRA1 family protein 2                                          |
| 0.938           | 0.977        | 0.963        | 0.968        | 0.916        | 0.984        | 1.030        | 1.039        | 1.007        | 1.080         | 0.968         | 1.068         | O75915       | ARL6IP5   | PRA1 family protein 3                                          |
|                 |              |              | 0.926        | 0.848        | 0.922        | 1.306        | 1.209        | 0.991        | 1.227         | 0.969         | 1.445         | A6NFR9       | PRAMEF14  | PRAME family member 14                                         |
| 1.075           | 1.085        | 0.995        | 1.167        | 1.130        | 1.329        | 0.976        | 1.326        | 1.040        | 1.334         | 1.095         | 1.663         | P40425       | PBX2      | Pre-B-cell leukemia transcription factor 2                     |
|                 |              |              | 0.782        | 0.747        | 1.036        |              |              |              | 0.834         | 0.961         | 0.786         | Q9BYU1       | PBX4      | Pre-B-cell leukemia transcription factor 4                     |
| 0.962           | 0.982        | 1.043        | 0.979        | 0.933        | 1.018        | 0.974        | 1.005        | 0.979        | 0.977         | 0.963         | 1.033         | Q96AQ6       | PBXIP1    | Pre-B-cell leukemia transcription factor-interacting protein 1 |
| 0.996           | 0.995        | 1.028        | 0.970        | 1.002        | 1.033        | 0.982        | 0.981        | 1.001        | 1.015         | 0.994         | 1.058         | O60925       | PFDN1     | Prefoldin subunit 1                                            |
| 1.036           | 0.994        | 1.005        | 0.985        | 0.932        | 1.017        | 0.988        | 1.052        | 1.008        | 0.969         | 1.006         | 0.988         | Q9UHV9       | PFDN2     | Prefoldin subunit 2                                            |
| 1.000           | 1.010        | 0.989        | 1.011        | 1.032        | 1.035        | 1.012        | 1.012        | 1.002        | 0.987         | 1.021         | 1.036         | P61758       | VBP1      | Prefoldin subunit 3                                            |
| 1.019           | 0.992        | 1.012        | 0.957        | 0.923        | 1.036        | 0.952        | 1.073        | 1.023        | 0.979         | 0.981         | 1.013         | Q9NQP4       | PFDN4     | Prefoldin subunit 4                                            |
| 1.041           | 1.014        | 0.984        | 1.040        | 1.039        | 0.983        | 1.010        | 1.025        | 1.001        | 0.986         | 1.007         | 0.984         | Q99471       | PFDN5     | Prefoldin subunit 5                                            |
| 0.944           | 0.982        | 0.970        | 0.975        | 1.036        | 1.012        | 0.968        | 0.951        | 0.986        | 0.953         | 0.993         | 0.963         | O15212       | PFDN6     | Prefoldin subunit 6                                            |

| Abundance Ratio |              |              |              |              |              |              |              |              |               |               |               | Accession ID | Gene name | Protein Description                                       |
|-----------------|--------------|--------------|--------------|--------------|--------------|--------------|--------------|--------------|---------------|---------------|---------------|--------------|-----------|-----------------------------------------------------------|
| 1 d<br>M1/C1    | 1 d<br>M2/C2 | 1 d<br>M3/C3 | 4 d<br>M1/C1 | 4 d<br>M2/C2 | 4 d<br>M3/C3 | 7 d<br>M1/C1 | 7 d<br>M2/C2 | 7 d<br>M3/C3 | 10 d<br>M1/C1 | 10 d<br>M2/C2 | 10 d<br>M3/C3 |              |           |                                                           |
| 0.728           | 1.125        | 0.986        |              |              |              |              |              |              |               |               |               | Q00888       | PSG4      | Pregnancy-specific beta-1-glycoprotein 4                  |
| 0.770           | 0.976        | 0.747        | 1.026        | 1.110        | 1.008        | 1.113        | 1.103        | 1.070        | 1.058         | 0.969         | 0.905         | Q00887       | PSG9      | Pregnancy-specific beta-1-glycoprotein 9                  |
| 1.005           | 1.000        | 0.994        | 0.992        | 0.992        | 0.987        | 0.961        | 0.974        | 0.972        | 0.979         | 1.019         | 0.969         | P02545       | LMNA      | Prelamin-A/C                                              |
| 0.908           | 0.987        | 0.904        |              |              |              | 1.337        | 1.525        | 1.301        |               |               |               | Q9Y3B1       | PRELID3B  | PRELI domain containing protein 3B                        |
|                 |              |              |              |              |              | 1.014        | 0.965        | 1.066        |               |               |               | Q9Y255       | PRELID1   | PRELI domain-containing protein 1, mitochondrial          |
| 0.998           | 0.992        | 1.015        | 0.968        | 0.979        | 0.979        | 1.001        | 1.012        | 1.010        | 0.983         | 0.975         | 1.016         | Q9C0J8       | WDR33     | pre-mRNA 3' end processing protein WDR33                  |
| 1.005           | 1.023        | 1.038        | 0.963        | 0.962        | 1.025        | 0.970        | 0.965        | 1.009        | 0.991         | 1.013         | 1.045         | Q6UN15       | FIP1L1    | Pre-mRNA 3'-end-processing factor FIP1                    |
| 0.989           | 0.987        | 1.044        | 0.968        | 0.971        | 1.015        | 1.020        | 1.038        | 1.050        | 1.034         | 1.016         | 1.063         | Q94913       | PCF11     | Pre-mRNA cleavage complex 2 protein Pcf11                 |
| 1.005           | 0.950        | 1.003        | 0.996        | 0.952        | 1.048        | 1.037        | 0.997        | 1.017        | 1.025         | 0.983         | 1.040         | Q60508       | CDC40     | Pre-mRNA-processing factor 17                             |
| 1.065           | 1.004        | 1.028        | 0.987        | 0.962        | 0.990        | 0.967        | 0.996        | 0.961        | 0.939         | 1.028         | 0.965         | Q9UMS4       | PRPF19    | Pre-mRNA-processing factor 19                             |
| 0.991           | 0.988        | 0.995        | 1.009        | 0.965        | 1.027        | 1.022        | 1.020        | 1.036        | 0.986         | 0.995         | 1.034         | Q86UA1       | PRPF39    | Pre-mRNA-processing factor 39                             |
| 1.037           | 0.985        | 1.025        | 1.024        | 0.996        | 0.871        | 1.053        | 0.997        | 1.035        | 1.021         | 0.995         | 0.937         | Q75400       | PRPF40A   | Pre-mRNA-processing factor 40 homolog A                   |
| 0.988           | 0.986        | 1.017        | 0.998        | 0.989        | 1.031        | 0.981        | 0.995        | 1.000        | 0.977         | 0.989         | 1.009         | Q94906       | PRPF6     | Pre-mRNA-processing factor 6                              |
| 0.994           | 1.001        | 0.997        | 0.995        | 0.974        | 1.018        | 0.999        | 1.059        | 1.006        | 0.984         | 1.025         | 0.972         | Q6P2Q9       | PRPF8     | Pre-mRNA-processing-splicing factor 8                     |
| 0.990           | 1.053        | 1.115        | 1.026        | 0.839        | 1.054        | 0.972        | 1.125        | 1.030        | 0.905         | 0.992         | 1.032         | Q99633       | PRPF18    | Pre-mRNA-splicing factor 18                               |
| 1.026           | 1.014        | 1.026        | 1.007        | 1.038        | 1.023        | 1.022        | 1.064        | 0.999        | 1.038         | 1.009         | 1.010         | Q8NAV1       | PRPF38A   | Pre-mRNA-splicing factor 38A                              |
| 0.995           | 0.972        | 1.022        | 0.959        | 0.894        | 1.014        | 0.945        | 0.982        | 0.974        | 0.961         | 0.950         | 0.945         | Q5VTL8       | PRPF38B   | Pre-mRNA-splicing factor 38B                              |
| 0.998           | 1.018        | 1.011        | 1.019        | 1.049        | 1.008        | 1.023        | 1.047        | 1.048        | 1.001         | 1.031         | 1.020         | Q43143       | DHX15     | Pre-mRNA-splicing factor ATP-dependent RNA helicase DHX15 |
| 1.038           | 0.991        | 1.012        | 0.993        | 0.962        | 1.023        | 1.036        | 1.038        | 1.036        | 0.992         | 1.021         | 0.992         | Q92620       | DHX38     | Pre-mRNA-splicing factor ATP-dependent RNA helicase PRP16 |
| 1.024           | 0.988        | 1.053        | 0.976        | 1.014        | 1.029        | 0.979        | 1.055        | 1.014        | 0.961         | 1.009         | 1.053         | Q9HCG8       | CWC22     | Pre-mRNA-splicing factor CWC22 homolog                    |
| 1.004           | 1.012        | 0.986        | 1.068        | 1.100        | 1.095        | 1.232        | 1.017        | 1.109        | 0.993         | 1.024         | 0.879         | Q9NXE8       | CWC25     | Pre-mRNA-splicing factor CWC25 homolog                    |
| 0.967           | 1.004        | 0.956        | 0.994        | 1.071        | 0.991        | 1.015        | 0.880        | 1.001        | 1.061         | 1.019         | 1.058         | Q9NW64       | RBM22     | Pre-mRNA-splicing factor RBM22                            |
| 1.011           | 1.019        | 1.024        | 0.995        | 0.953        | 1.035        | 1.026        | 1.038        | 1.064        | 1.040         | 1.029         | 1.031         | Q95391       | SLU7      | Pre-mRNA-splicing factor SLU7                             |
| 0.993           | 0.998        | 0.982        | 1.013        | 0.980        | 1.027        | 1.025        | 1.056        | 0.986        | 1.025         | 1.046         | 1.023         | Q75934       | BCAS2     | Pre-mRNA-splicing factor SPF27                            |
| 0.990           | 0.989        | 1.029        | 1.026        | 0.970        | 1.028        | 1.023        | 1.037        | 1.006        | 1.015         | 1.000         | 1.041         | Q9HCS7       | XAB2      | Pre-mRNA-splicing factor SYF1                             |
| 1.063           | 0.709        | 0.810        | 0.961        | 1.005        | 1.087        | 1.050        | 0.953        | 0.998        | 1.008         | 1.062         | 0.987         | Q95926       | SYF2      | Pre-mRNA-splicing factor SYF2                             |
| 1.021           | 1.008        | 1.023        | 1.000        | 1.007        | 1.025        | 1.026        | 1.051        | 1.008        | 1.040         | 1.013         | 1.055         | Q15007       | WTAP      | Pre-mRNA-splicing regulator WTAP                          |
| 0.998           | 1.040        | 1.041        | 1.027        | 0.938        | 0.932        | 1.019        | 1.113        | 1.002        | 1.015         | 1.040         | 1.039         | Q9UI14       | RABAC1    | Prenylated Rab acceptor protein 1                         |
| 1.027           | 1.002        | 1.004        | 1.001        | 1.016        | 0.947        | 0.953        | 0.983        | 0.978        | 0.981         | 0.978         | 0.931         | Q9UHG3       | PCYOX1    | Prenylcysteine oxidase 1                                  |
| 0.998           | 1.073        | 1.022        |              |              |              |              |              |              |               |               |               | Q8NBM8       | PCYOX1L   | Prenylcysteine oxidase-like                               |
| 0.990           | 0.989        | 1.017        | 0.991        | 0.955        | 1.024        | 0.976        | 0.997        | 1.008        | 1.002         | 1.010         | 1.046         | Q8IY81       | FTSJ3     | pre-rRNA processing protein FTSJ3                         |
| 0.987           | 0.996        | 1.018        | 1.010        | 1.026        | 1.020        | 1.009        | 1.051        | 0.988        | 0.981         | 1.014         | 1.016         | Q2NL82       | TSR1      | Pre-rRNA-processing protein TSR1 homolog                  |

| Abundance Ratio |              |              |              |              |              |              |              |              |               |               |               | Accession ID | Gene name | Protein Description                                                      |
|-----------------|--------------|--------------|--------------|--------------|--------------|--------------|--------------|--------------|---------------|---------------|---------------|--------------|-----------|--------------------------------------------------------------------------|
| 1 d<br>M1/C1    | 1 d<br>M2/C2 | 1 d<br>M3/C3 | 4 d<br>M1/C1 | 4 d<br>M2/C2 | 4 d<br>M3/C3 | 7 d<br>M1/C1 | 7 d<br>M2/C2 | 7 d<br>M3/C3 | 10 d<br>M1/C1 | 10 d<br>M2/C2 | 10 d<br>M3/C3 |              |           |                                                                          |
| 0.965           | 0.964        | 0.917        | 0.990        | 1.008        | 1.096        | 1.047        | 0.939        | 1.005        | 0.947         | 1.048         | 1.110         | Q969E8       | TSR2      | Pre-rRNA-processing protein TSR2 homolog                                 |
| 1.018           | 0.871        | 1.001        | 0.855        | 0.898        | 1.053        |              |              |              | 0.915         | 0.861         | 0.854         | B1AP22       | PSEN2     | Presenilin                                                               |
| 0.943           | 1.015        | 1.048        | 0.982        | 0.889        | 1.035        | 1.019        | 0.958        | 1.066        | 1.084         | 0.997         | 1.161         | P49768       | PSEN1     | Presenilin-1                                                             |
| 1.075           | 0.968        | 1.008        | 0.986        | 0.894        | 0.993        | 1.033        | 1.017        | 1.084        | 1.105         | 1.035         | 1.023         | Q9H300       | PARL      | Presenilins-associated rhomboid-like protein, mitochondrial              |
| 0.964           | 1.181        | 1.135        | 0.815        | 0.995        | 0.771        | 0.903        | 0.787        | 0.847        | 1.143         | 0.947         | 1.192         | O43900       | PRICKLE3  | Prickle-like protein 3                                                   |
| 1.014           | 0.971        | 0.984        | 1.011        | 0.999        | 1.007        | 1.034        | 1.046        | 1.023        | 1.008         | 1.017         | 1.056         | Q96IZ0       | PAWR      | PRKC apoptosis WT1 regulator protein                                     |
| 1.049           | 1.080        | 1.081        | 0.961        | 0.890        | 0.969        | 1.070        | 1.237        | 1.036        | 0.944         | 0.995         | 1.155         | Q9NRD5       | PICK1     | PRKCA-binding protein                                                    |
| 0.984           | 0.978        | 1.011        | 1.015        | 0.972        | 1.069        | 0.996        | 0.939        | 1.005        | 1.049         | 1.019         | 1.078         | Q9H875       | PRKRIP1   | PRKR-interacting protein 1                                               |
| 0.964           | 1.022        | 1.026        | 0.977        | 0.917        | 1.047        | 0.986        | 1.123        | 1.036        | 0.835         | 0.963         | 1.116         | O43709       | BUD23     | Probable 18S rRNA (guanine-N(7))-methyltransferase                       |
| 1.025           | 0.974        | 1.016        | 1.019        | 0.941        | 0.967        | 1.024        | 0.960        | 0.981        | 1.066         | 0.908         | 0.994         | Q96HY7       | DHTKD1    | Probable 2-oxoglutarate dehydrogenase E1 component DHKTD1, mitochondrial |
| 1.067           | 1.027        | 0.977        | 1.019        | 1.023        | 1.000        | 1.017        | 1.072        | 0.993        | 1.107         | 0.972         | 1.042         | Q8NDH3       | NPEPL1    | Probable aminopeptidase NPEPL1                                           |
| 0.996           | 0.983        | 1.025        | 0.979        | 0.909        | 1.021        | 0.987        | 0.995        | 1.006        | 0.978         | 0.984         | 1.056         | Q5T160       | RARS2     | Probable arginine--tRNA ligase, mitochondrial                            |
| 0.981           | 0.994        | 1.012        | 0.982        | 1.015        | 0.977        | 0.995        | 0.985        | 0.985        | 0.978         | 0.955         | 0.969         | Q96I59       | NARS2     | Probable asparagine--tRNA ligase, mitochondrial                          |
| 1.036           | 1.024        | 1.051        | 1.020        | 0.955        | 1.025        | 0.996        | 1.078        | 0.977        | 0.985         | 1.011         | 1.000         | Q13206       | DDX10     | Probable ATP-dependent RNA helicase DDX10                                |
| 1.016           | 0.997        | 0.997        | 0.984        | 1.008        | 0.997        | 0.994        | 0.997        | 0.982        | 0.992         | 1.000         | 0.976         | Q92841       | DDX17     | Probable ATP-dependent RNA helicase DDX17                                |
| 1.007           | 1.010        | 1.021        | 0.991        | 0.966        | 1.018        | 0.996        | 1.046        | 1.000        | 0.969         | 0.978         | 1.063         | Q9UHI6       | DDX20     | Probable ATP-dependent RNA helicase DDX20                                |
| 0.971           | 1.000        | 0.992        | 0.982        | 0.977        | 1.027        | 0.981        | 1.007        | 0.998        | 0.995         | 0.992         | 1.014         | Q9BUQ8       | DDX23     | Probable ATP-dependent RNA helicase DDX23                                |
| 0.982           | 0.991        | 1.002        | 1.010        | 1.005        | 1.045        | 1.001        | 1.010        | 1.012        | 0.986         | 1.016         | 1.002         | Q96GQ7       | DDX27     | Probable ATP-dependent RNA helicase DDX27                                |
| 0.980           | 0.998        | 1.027        | 0.968        | 0.969        | 1.023        | 1.016        | 0.987        | 1.004        | 1.026         | 1.001         | 1.122         | Q9NUL7       | DDX28     | Probable ATP-dependent RNA helicase DDX28                                |
| 1.048           | 1.021        | 1.043        | 1.001        | 0.973        | 0.998        | 1.019        | 1.009        | 1.027        | 1.030         | 0.998         | 1.032         | Q9H8H2       | DDX31     | Probable ATP-dependent RNA helicase DDX31                                |
| 1.016           | 0.991        | 0.992        | 1.020        | 0.962        | 1.015        | 0.978        | 1.070        | 0.996        | 0.975         | 1.000         | 0.974         | J3KNN5       | DDX41     | Probable ATP-dependent RNA helicase DDX41 (Fragment)                     |
| 0.988           | 0.998        | 0.997        | 1.011        | 0.911        | 1.059        | 1.018        | 1.124        | 1.076        | 1.031         | 0.989         | 0.864         | A0A0C4DG89   | DDX46     | Probable ATP-dependent RNA helicase DDX46                                |
| 0.975           | 0.997        | 0.997        | 0.991        | 0.979        | 0.999        | 1.003        | 0.974        | 0.981        | 1.008         | 1.000         | 1.036         | Q7L014       | DDX46     | Probable ATP-dependent RNA helicase DDX46                                |
| 0.981           | 1.015        | 1.003        | 1.015        | 0.971        | 1.030        | 0.985        | 1.117        | 1.007        | 0.962         | 1.022         | 0.968         | Q9H0S4       | DDX47     | Probable ATP-dependent RNA helicase DDX47                                |
| 1.096           | 0.998        | 1.056        | 1.071        | 0.967        | 1.053        | 1.010        | 1.197        | 0.985        | 1.251         | 0.752         | 1.018         | Q9Y6V7       | DDX49     | Probable ATP-dependent RNA helicase DDX49                                |
| 1.008           | 1.001        | 0.997        | 1.006        | 0.993        | 1.006        | 1.019        | 1.027        | 1.038        | 1.009         | 0.980         | 1.014         | P17844       | DDX5      | Probable ATP-dependent RNA helicase DDX5                                 |
| 0.968           | 1.084        | 0.994        | 0.983        | 0.941        | 1.063        | 1.020        | 1.019        | 1.003        | 1.047         | 1.018         | 1.019         | Q9Y2R4       | DDX52     | Probable ATP-dependent RNA helicase DDX52                                |
| 1.010           | 0.995        | 1.044        | 1.024        | 0.973        | 1.028        | 0.993        | 1.014        | 1.052        | 0.986         | 1.035         | 1.039         | Q9NY93       | DDX56     | Probable ATP-dependent RNA helicase DDX56                                |
| 1.011           | 1.010        | 1.032        | 1.010        | 0.960        | 0.994        | 1.014        | 1.008        | 0.984        | 1.040         | 0.942         | 1.101         | O95786       | DDX58     | Probable ATP-dependent RNA helicase DDX58                                |
| 1.034           | 1.033        | 0.987        | 1.007        | 0.959        | 0.972        | 1.063        | 1.150        | 1.051        | 0.941         | 0.988         | 1.020         | Q5T1V6       | DDX59     | Probable ATP-dependent RNA helicase DDX59                                |
| 1.009           | 1.006        | 1.001        | 0.999        | 1.050        | 1.007        | 1.001        | 0.992        | 1.028        | 0.981         | 1.059         | 1.006         | P26196       | DDX6      | Probable ATP-dependent RNA helicase DDX6                                 |

| Abundance Ratio |              |              |              |              |              |              |              |              |               |               |               | Accession ID | Gene name | Protein Description                                                           |
|-----------------|--------------|--------------|--------------|--------------|--------------|--------------|--------------|--------------|---------------|---------------|---------------|--------------|-----------|-------------------------------------------------------------------------------|
| 1 d<br>M1/C1    | 1 d<br>M2/C2 | 1 d<br>M3/C3 | 4 d<br>M1/C1 | 4 d<br>M2/C2 | 4 d<br>M3/C3 | 7 d<br>M1/C1 | 7 d<br>M2/C2 | 7 d<br>M3/C3 | 10 d<br>M1/C1 | 10 d<br>M2/C2 | 10 d<br>M3/C3 |              |           |                                                                               |
| 1.041           | 1.013        | 1.052        | 0.909        | 0.895        | 1.008        | 0.906        | 1.134        | 1.071        | 1.020         | 0.958         | 1.107         | Q8IY21       | DDX60     | Probable ATP-dependent RNA helicase DDX60                                     |
| 1.024           | 0.997        | 1.090        | 1.002        | 1.010        | 1.070        |              |              |              |               |               |               | Q14147       | DHX34     | Probable ATP-dependent RNA helicase DHX34                                     |
| 0.975           | 1.010        | 0.977        | 0.975        | 0.997        | 1.035        | 0.958        | 1.030        | 1.129        | 0.913         | 1.021         | 1.067         | Q9H5Z1       | DHX35     | Probable ATP-dependent RNA helicase DHX35                                     |
| 1.020           | 1.006        | 1.056        | 0.999        | 1.022        | 0.992        | 0.972        | 1.023        | 1.005        | 0.939         | 1.031         | 0.998         | Q8IY37       | DHX37     | Probable ATP-dependent RNA helicase DHX37                                     |
| 0.984           | 0.999        | 0.982        | 1.003        | 1.007        | 1.023        | 0.990        | 1.077        | 1.071        | 0.981         | 0.946         | 1.032         | Q8IX18       | DHX40     | Probable ATP-dependent RNA helicase DHX40                                     |
| 1.011           | 1.006        | 1.004        | 1.004        | 0.997        | 1.018        | 1.029        | 1.067        | 1.028        | 1.033         | 0.980         | 1.024         | Q9H6S0       | YTHDC2    | Probable ATP-dependent RNA helicase YTHDC2                                    |
| 1.105           | 0.903        | 1.127        | 1.048        | 0.904        | 1.017        | 0.979        | 1.193        | 1.077        | 0.998         | 1.117         | 0.924         | Q9H7F0       | ATP13A3   | Probable cation-transporting ATPase 13A3                                      |
| 0.989           | 1.049        | 1.032        | 0.991        | 0.964        | 0.972        | 1.063        | 1.054        | 0.971        | 1.073         | 1.053         | 1.056         | A0A1B0GW05   | DPY19L1   | Probable C-mannosyltransferase DPY19L1                                        |
|                 |              |              | 0.945        | 0.951        | 0.975        |              |              |              |               |               |               | Q7Z388       | DPY19L4   | Probable C-mannosyltransferase DPY19L4                                        |
| 1.127           | 1.092        | 1.038        | 0.994        | 0.940        | 1.027        | 0.997        | 1.104        | 1.048        | 1.057         | 0.949         | 1.079         | Q9HA77       | CARS2     | Probable cysteine--tRNA ligase, mitochondrial                                 |
| 1.001           | 0.957        | 1.057        | 1.036        | 1.168        | 0.989        | 1.075        | 0.976        | 1.031        | 0.968         | 1.015         | 1.027         | O76071       | CIAO1     | Probable cytosolic iron-sulfur protein assembly protein CIAO1                 |
| 1.036           | 1.015        | 1.001        | 1.009        | 1.002        | 1.020        | 1.026        | 1.109        | 1.012        | 0.971         | 1.044         | 0.985         | Q9UNQ2       | DIMT1     | Probable dimethyladenosine transferase                                        |
| 0.883           | 0.915        | 1.009        | 1.000        | 0.812        | 1.181        | 1.041        | 1.102        | 1.127        | 1.126         | 1.043         | 1.080         | Q9BVK2       | ALG8      | Probable dolichyl pyrophosphate Glc1Man9GlcNAc2 alpha-1,3-glucosyltransferase |
|                 |              |              | 0.790        | 1.059        | 0.959        |              |              |              |               |               |               | Q96FN9       | DTD2      | Probable D-tyrosyl-tRNA(Tyr) deacylase 2                                      |
| 1.080           | 1.039        | 1.013        | 1.007        | 0.964        | 0.981        | 0.942        | 1.042        | 0.930        | 0.935         | 0.953         | 0.953         | J3KPF0       | HECTD4    | Probable E3 ubiquitin-protein ligase HECTD4                                   |
| 1.016           | 1.099        | 1.008        | 1.000        | 1.027        | 0.975        | 1.056        | 1.185        | 0.938        |               |               |               | Q15751       | HERC1     | Probable E3 ubiquitin-protein ligase HERC1                                    |
| 0.991           | 0.988        | 1.016        | 0.996        | 0.963        | 1.004        | 1.019        | 1.104        | 1.035        | 1.005         | 0.983         | 1.012         | Q5GLZ8       | HERC4     | Probable E3 ubiquitin-protein ligase HERC4                                    |
| 0.936           | 0.958        | 0.917        | 0.965        | 0.952        | 1.134        | 0.997        | 1.047        | 1.012        | 1.017         | 1.052         | 0.937         | Q8IVU3       | HERC6     | Probable E3 ubiquitin-protein ligase HERC6                                    |
| 1.071           | 0.998        | 1.029        | 1.059        | 1.190        | 1.067        | 1.157        | 0.940        | 1.055        | 1.071         | 0.990         | 1.033         | Q9H000       | MKRN2     | Probable E3 ubiquitin-protein ligase makorin-2                                |
| 1.366           | 0.949        | 1.554        |              |              |              | 0.944        | 0.834        | 0.962        | 1.006         | 1.194         | 1.224         | Q9UJV3       | MID2      | Probable E3 ubiquitin-protein ligase MID2                                     |
| 1.026           | 1.000        | 1.072        | 1.001        | 0.896        | 1.012        | 1.115        | 1.054        | 1.049        | 1.091         | 0.934         | 1.124         | J3KNI5       | TRIML2    | Probable E3 ubiquitin-protein ligase TRIML2 (Fragment)                        |
| 1.076           | 1.044        | 1.154        | 1.039        | 0.885        | 0.806        | 0.855        | 1.123        | 1.053        | 0.980         | 0.986         | 0.840         | Q9UKR5       | C14orf1   | Probable ergosterol biosynthetic protein 28                                   |
| 0.993           | 0.985        | 1.005        | 0.980        | 0.982        | 0.965        | 0.988        | 0.996        | 0.982        | 1.019         | 0.969         | 1.019         | B7ZLQ5       | SMARCA1   | Probable global transcription activator SNF2L1                                |
| 0.958           | 0.902        | 1.022        | 1.071        | 1.010        | 0.931        | 0.981        | 1.104        | 1.035        | 1.058         | 0.927         | 1.077         | P51531       | SMARCA2   | Probable global transcription activator SNF2L2                                |
| 0.982           | 0.976        | 0.953        | 0.913        | 0.935        | 1.011        | 0.930        | 1.105        | 0.943        | 0.925         | 1.043         | 1.023         | Q8TED1       | GPX8      | Probable glutathione peroxidase 8                                             |
| 1.020           | 1.016        | 1.042        | 0.986        | 0.914        | 1.019        | 1.032        | 1.202        | 1.040        | 1.048         | 1.047         | 1.137         | J3QS41       | HELZ      | Probable helicase with zinc finger domain                                     |
| 0.958           | 0.984        | 1.008        | 1.016        | 0.977        | 1.010        | 1.003        | 0.981        | 1.004        | 0.988         | 0.934         | 1.053         | P49590       | HARS2     | Probable histidine--tRNA ligase, mitochondrial                                |
| 1.115           | 0.858        | 1.073        | 0.997        | 0.934        | 1.027        | 1.111        | 0.909        | 1.040        | 1.052         | 1.032         | 1.121         | Q8N490       | PNKD      | Probable hydrolase PNKD                                                       |
| 1.066           | 0.980        | 0.990        | 1.030        | 0.872        | 1.039        | 1.121        | 0.873        | 0.915        | 0.964         | 0.987         | 0.950         | Q15652       | JMJD1C    | Probable JmjC domain-containing histone demethylation protein 2C              |
| 1.003           | 0.989        | 0.987        | 0.972        | 0.972        | 0.977        | 0.971        | 0.973        | 0.958        | 1.003         | 0.957         | 1.003         | Q15031       | LARS2     | Probable leucine--tRNA ligase, mitochondrial                                  |
| 0.941           | 0.923        | 0.949        | 0.906        | 0.921        | 1.130        | 1.074        | 1.098        | 1.151        | 1.095         | 0.960         | 1.130         | Q9NUN5       | LMBRD1    | Probable lysosomal cobalamin transporter                                      |

| Abundance Ratio |              |              |              |              |              |              |              |              |               |               |               | Accession ID | Gene name | Protein Description                                                    |
|-----------------|--------------|--------------|--------------|--------------|--------------|--------------|--------------|--------------|---------------|---------------|---------------|--------------|-----------|------------------------------------------------------------------------|
| 1 d<br>M1/C1    | 1 d<br>M2/C2 | 1 d<br>M3/C3 | 4 d<br>M1/C1 | 4 d<br>M2/C2 | 4 d<br>M3/C3 | 7 d<br>M1/C1 | 7 d<br>M2/C2 | 7 d<br>M3/C3 | 10 d<br>M1/C1 | 10 d<br>M2/C2 | 10 d<br>M3/C3 |              |           |                                                                        |
|                 |              |              | 0.852        | 0.859        | 1.087        | 0.868        | 1.086        | 1.043        | 1.102         | 1.023         | 1.258         | Q13395       | TARBP1    | Probable methyltransferase TARBP1                                      |
| 0.964           | 0.999        | 0.972        | 0.959        | 1.009        | 1.014        | 1.037        | 0.922        | 1.022        | 1.058         | 0.979         | 1.103         | A6NJ78       | METTL15   | Probable methyltransferase-like protein 15                             |
| 1.070           | 1.020        | 0.998        | 0.924        | 1.171        | 0.962        | 1.089        | 0.968        | 1.086        | 0.864         | 1.110         | 0.985         | Q5W0Z9       | ZDHHC20   | Probable palmitoyltransferase ZDHHC20                                  |
|                 |              |              |              |              |              |              |              |              | 1.372         | 0.981         | 0.947         | Q9NPG8       | ZDHHC4    | Probable palmitoyltransferase ZDHHC4                                   |
|                 |              |              | 1.261        | 1.168        | 1.034        |              |              |              | 1.027         | 1.011         | 1.045         | Q9H3J6       | C12orf65  | Probable peptide chain release factor C12orf65, mitochondrial          |
| 1.062           | 0.997        | 1.050        | 0.990        | 0.927        | 0.972        | 1.016        | 0.961        | 1.016        | 1.018         | 1.016         | 1.059         | Q86Y79       | PTRH1     | Probable peptidyl-tRNA hydrolase                                       |
| 0.982           | 1.074        | 1.023        | 1.195        | 1.173        | 1.147        | 0.823        | 0.672        | 1.059        | 0.876         | 0.993         | 1.267         | Q9Y2G3       | ATP11B    | Probable phospholipid-transporting ATPase IF                           |
| 0.962           | 1.021        | 0.940        |              |              |              | 0.769        | 0.987        | 1.009        | 1.168         | 0.821         | 1.183         | O75110       | ATP9A     | Probable phospholipid-transporting ATPase IIA                          |
| 0.963           | 1.025        | 1.071        | 0.977        | 0.945        | 1.016        | 0.935        | 0.913        | 0.943        | 1.009         | 0.970         | 1.046         | O43861       | ATP9B     | Probable phospholipid-transporting ATPase IIB                          |
| 1.038           | 1.010        | 0.964        | 0.971        | 0.941        | 1.024        | 0.970        | 1.095        | 1.039        | 1.010         | 0.948         | 1.011         | Q7L3T8       | PARS2     | Probable proline--tRNA ligase, mitochondrial                           |
| 1.007           | 1.009        | 0.958        | 1.020        | 0.987        | 1.087        | 0.972        | 1.025        | 0.971        | 0.995         | 1.059         | 1.041         | Q9UHA3       | RSL24D1   | Probable ribosome biogenesis protein RLP24                             |
| 1.084           | 0.835        | 1.000        | 0.909        | 0.972        | 1.126        | 0.986        | 0.735        | 1.171        | 1.041         | 1.084         | 3.110         | Q96CW6       | SLC7A6OS  | Probable RNA polymerase II nuclear localization protein SLC7A6OS       |
| 1.083           | 1.084        | 0.892        | 0.997        | 1.001        | 1.076        | 1.112        | 1.122        | 1.011        | 1.092         | 1.017         | 1.006         | Q96H35       | RBM18     | Probable RNA-binding protein 18                                        |
| 1.005           | 0.978        | 0.982        | 1.011        | 0.936        | 1.028        | 1.024        | 1.022        | 0.983        | 1.033         | 1.021         | 1.046         | Q9Y4C8       | RBM19     | Probable RNA-binding protein 19                                        |
| 1.001           | 0.990        | 0.912        | 0.911        | 0.945        | 1.010        | 0.977        | 1.094        | 0.965        |               |               |               | Q86U06       | RBM23     | Probable RNA-binding protein 23                                        |
| 0.848           | 1.093        | 0.835        | 1.005        | 1.013        | 1.008        | 1.018        | 1.059        | 0.975        | 0.945         | 0.944         | 1.036         | Q8N9N8       | EIF1AD    | Probable RNA-binding protein EIF1AD                                    |
| 0.988           | 0.928        | 0.870        | 1.110        | 0.939        | 1.123        | 0.916        | 0.849        | 1.140        | 1.070         | 0.921         | 1.033         | A2RTX5       | TARSL2    | Probable threonine--tRNA ligase 2, cytoplasmic                         |
| 0.995           | 0.976        | 0.991        | 1.001        | 0.980        | 0.981        | 0.969        | 1.030        | 1.035        | 0.981         | 1.022         | 1.081         | Q9NPF4       | OSGEP     | Probable tRNA N6-adenosine threonylcarbamoyltransferase                |
| 1.008           | 1.041        | 0.981        | 1.093        | 0.990        | 1.071        | 1.009        | 1.066        | 1.010        | 1.050         | 1.026         | 1.010         | Q9H4B0       | OSGEPL1   | Probable tRNA N6-adenosine threonylcarbamoyltransferase, mitochondrial |
| 1.075           | 1.010        | 1.004        | 0.993        | 0.949        | 1.005        | 1.020        | 1.056        | 0.938        | 0.977         | 0.985         | 1.005         | Q8WWH5       | TRUB1     | Probable tRNA pseudouridine synthase 1                                 |
| 0.989           | 0.980        | 1.032        | 0.992        | 0.867        | 1.043        | 1.141        | 1.108        | 0.993        | 0.932         | 0.983         | 1.188         | O95900       | TRUB2     | Probable tRNA pseudouridine synthase 2                                 |
| 1.031           | 0.992        | 1.024        | 1.039        | 1.008        | 0.989        | 0.998        | 1.172        | 0.983        | 1.062         | 1.029         | 0.966         | Q9NWX6       | THG1L     | Probable tRNA(His) guanylyltransferase                                 |
| 1.013           | 0.991        | 1.006        | 0.992        | 0.906        | 1.023        | 1.008        | 1.025        | 1.011        | 1.038         | 0.993         | 0.990         | Q9Y3A2       | UTP11     | Probable U3 small nucleolar RNA-associated protein 11                  |
| 0.977           | 0.999        | 1.013        | 0.996        | 0.984        | 1.021        | 1.015        | 1.030        | 1.013        | 0.981         | 0.946         | 1.033         | Q93008       | USP9X     | Probable ubiquitin carboxyl-terminal hydrolase FAF-X                   |
| 1.029           | 1.005        | 0.985        | 0.968        | 0.956        | 0.993        | 0.995        | 1.007        | 1.017        | 1.023         | 0.991         | 1.023         | Q9NQH7       | XPNPEP3   | Probable Xaa-Pro aminopeptidase 3                                      |
| 1.181           | 1.037        | 1.066        | 1.023        | 0.948        | 1.012        | 0.959        | 1.148        | 0.961        | 0.911         | 1.019         | 0.869         | P09668       | CTSH      | Pro-cathepsin H                                                        |
| 0.975           | 0.995        | 1.007        | 0.972        | 0.998        | 1.039        | 0.992        | 1.028        | 1.017        | 0.975         | 0.986         | 1.015         | Q8NBJ5       | COLGALT1  | Procollagen galactosyltransferase 1                                    |
| 0.987           | 0.985        | 1.009        | 0.995        | 1.009        | 1.028        | 0.972        | 1.026        | 1.003        | 0.986         | 0.976         | 1.006         | O60568       | PLOD3     | Procollagen-lysine,2-oxoglutarate 5-dioxygenase 3                      |
| 0.935           | 1.111        | 0.973        | 0.973        | 0.963        | 1.266        | 1.141        | 1.120        | 1.183        | 1.138         | 1.060         | 1.161         | O14944       | EREG      | Proepiregulin                                                          |

| Abundance Ratio |              |              |              |              |              |              |              |              |               |               |               | Accession ID | Gene name | Protein Description                                       |
|-----------------|--------------|--------------|--------------|--------------|--------------|--------------|--------------|--------------|---------------|---------------|---------------|--------------|-----------|-----------------------------------------------------------|
| 1 d<br>M1/C1    | 1 d<br>M2/C2 | 1 d<br>M3/C3 | 4 d<br>M1/C1 | 4 d<br>M2/C2 | 4 d<br>M3/C3 | 7 d<br>M1/C1 | 7 d<br>M2/C2 | 7 d<br>M3/C3 | 10 d<br>M1/C1 | 10 d<br>M2/C2 | 10 d<br>M3/C3 |              |           |                                                           |
| 0.845           | 0.935        | 1.107        | 0.952        | 0.839        | 1.042        | 0.940        | 1.045        | 1.112        | 1.066         | 0.977         | 1.230         | I3L3D5       | PFN1      | Profilin (Fragment)                                       |
| 1.005           | 1.036        | 0.949        | 0.993        | 0.966        | 0.991        | 0.978        | 1.011        | 0.967        | 1.004         | 1.026         | 0.975         | G5E9Q6       | PFN2      | Profilin                                                  |
| 1.016           | 1.000        | 0.959        | 1.039        | 0.943        | 1.005        | 1.020        | 1.038        | 0.995        | 0.992         | 0.977         | 0.956         | P07737       | PFN1      | Profilin-1                                                |
| 0.930           | 1.061        | 0.904        | 1.039        | 0.986        | 1.098        | 0.937        | 1.013        | 1.045        | 0.997         | 1.064         | 1.078         | P35080       | PFN2      | Profilin-2                                                |
| 1.133           | 1.106        | 1.039        | 1.026        | 1.076        | 0.966        |              |              |              | 0.933         | 0.912         | 1.096         | Q8WXW3       | PIBF1     | Progesterone-induced-blocking factor 1                    |
|                 |              |              | 0.886        | 0.968        | 1.249        |              |              |              |               |               |               | Q6TCH7       | PAQR3     | Progesterone-induced-blocking factor 1                    |
| 1.012           | 1.010        | 1.024        | 1.009        | 0.998        | 1.013        | 1.004        | 1.019        | 1.006        | 1.009         | 0.994         | 1.000         | Q8WUM4       | PDCC6IP   | Programmed cell death 6-interacting protein               |
| 1.026           | 1.012        | 1.018        | 0.984        | 0.967        | 1.027        | 0.975        | 1.045        | 1.017        | 0.973         | 1.002         | 1.021         | Q9BUL8       | PDCC10    | Programmed cell death protein 10                          |
| 1.078           | 1.049        | 1.057        | 0.990        | 0.975        | 1.052        | 0.985        | 1.020        | 0.986        | 1.010         | 1.065         | 1.048         | Q16342       | PDCC2     | Programmed cell death protein 2                           |
| 0.867           | 1.146        | 1.022        | 1.968        | 0.792        | 1.073        | 1.000        | 1.003        | 1.059        | 0.848         | 1.081         | 1.022         | Q9BRP1       | PDCC2L    | Programmed cell death protein 2-like                      |
| 1.028           | 0.977        | 0.999        | 0.992        | 0.940        | 1.012        | 0.988        | 1.040        | 1.005        | 1.009         | 0.950         | 1.047         | Q53EL6       | PDCC4     | Programmed cell death protein 4                           |
| 0.991           | 1.026        | 0.956        | 0.988        | 0.982        | 0.990        | 0.990        | 1.051        | 0.990        | 0.959         | 0.985         | 0.985         | O14737       | PDCC5     | Programmed cell death protein 5                           |
| 0.993           | 1.024        | 0.947        | 1.081        | 0.993        | 0.997        | 1.097        | 1.108        | 0.976        | 1.086         | 1.025         | 0.961         | O75340       | PDCC6     | Programmed cell death protein 6                           |
|                 |              |              | 1.061        | 1.106        | 0.794        |              |              |              |               |               |               | Q8N8D1       | PDCC7     | Programmed cell death protein 7                           |
| 1.034           | 0.996        | 1.024        | 0.993        | 1.004        | 1.015        | 0.942        | 1.005        | 1.013        | 0.925         | 0.985         | 0.940         | P35232       | PHB       | Prohibitin                                                |
| 0.999           | 0.998        | 0.995        | 0.982        | 0.973        | 1.024        | 0.992        | 0.989        | 1.008        | 0.995         | 1.008         | 1.021         | Q99623       | PHB2      | Prohibitin-2                                              |
| 0.963           | 0.994        | 0.988        | 1.006        | 0.894        | 0.948        | 0.946        | 0.983        | 0.972        | 1.030         | 1.065         | 0.997         | Q9HCU5       | PREB      | Prolactin regulatory element-binding protein              |
| 0.938           | 0.998        | 0.969        | 0.993        | 1.018        | 0.971        | 1.073        | 1.048        | 0.994        | 0.968         | 0.971         | 1.064         | P12004       | PCNA      | Proliferating cell nuclear antigen                        |
| 0.942           | 0.994        | 1.014        | 0.994        | 0.928        | 0.988        | 1.050        | 1.113        | 1.030        | 0.907         | 0.899         | 1.059         | P46013       | MKI67     | Proliferation marker protein Ki-67                        |
| 0.967           | 1.002        | 0.973        | 1.000        | 1.001        | 1.004        | 0.977        | 1.019        | 1.000        | 0.975         | 1.026         | 0.969         | Q9UQ80       | PA2G4     | Proliferation-associated protein 2G4                      |
| 0.913           | 0.986        | 1.159        |              |              |              |              |              |              |               |               |               | Q86XN7       | PROSER1   | Proline and serine-rich protein 1                         |
| 1.002           | 1.028        | 1.010        | 1.005        | 1.148        | 1.005        | 0.990        | 0.918        | 1.045        | 1.047         | 0.946         | 1.163         | Q86WR7       | PROSER2   | Proline and serine-rich protein 2                         |
| 1.005           | 0.993        | 0.985        | 1.003        | 0.980        | 0.995        | 1.033        | 1.025        | 1.022        | 1.011         | 1.011         | 1.037         | O94903       | PROSC     | Proline synthase co-transcribed bacterial homolog protein |
| 1.000           | 1.018        | 1.003        | 0.999        | 1.016        | 0.998        | 1.034        | 1.033        | 0.992        | 0.992         | 0.993         | 0.979         | C9JFV4       | PELP1     | Proline-, glutamic acid- and leucine-rich protein 1       |
| 1.041           | 1.010        | 1.089        |              |              |              |              |              |              |               |               |               | Q96HE9       | PRR11     | Proline-rich protein 11                                   |
| 1.152           | 0.982        | 1.143        | 1.090        | 0.944        | 1.112        | 0.986        | 0.887        | 1.058        | 0.850         | 0.973         | 1.093         | Q9BWN1       | PRR14     | Proline-rich protein 14                                   |
| 1.060           | 0.979        | 1.026        | 1.035        | 1.008        | 1.017        | 1.235        | 1.034        | 1.020        | 0.928         | 0.971         | 0.964         | P79522       | PRR3      | Proline-rich protein 3                                    |
| 1.001           | 1.004        | 0.978        | 1.010        | 0.971        | 1.012        | 0.989        | 1.011        | 0.988        | 1.086         | 1.005         | 1.065         | Q92733       | PRCC      | Proline-rich protein PRCC                                 |
| 1.003           | 0.993        | 1.013        | 1.026        | 0.950        | 1.012        | 1.026        | 1.136        | 1.046        | 1.059         | 0.960         | 1.178         | Q07954       | LRP1      | Prolow-density lipoprotein receptor-related protein 1     |
| 0.996           | 0.996        | 0.988        | 1.022        | 0.979        | 1.000        | 0.967        | 0.989        | 1.004        | 1.007         | 0.954         | 1.038         | Q32P28       | P3H1      | Prolyl 3-hydroxylase 1                                    |
| 0.973           | 0.947        | 1.010        | 0.933        | 0.828        | 0.935        |              |              |              |               |               |               | Q8IVL5       | P3H2      | Prolyl 3-hydroxylase 2                                    |
| 0.938           | 0.976        | 0.974        | 1.003        | 0.958        | 1.014        | 1.034        | 0.989        | 0.974        | 0.989         | 0.964         | 1.079         | Q8N543       | OGFOD1    | Prolyl 3-hydroxylase OGFOD1                               |

| Abundance Ratio |              |              |              |              |              |              |              |              |               |               |               | Accession ID | Gene name | Protein Description                                  |
|-----------------|--------------|--------------|--------------|--------------|--------------|--------------|--------------|--------------|---------------|---------------|---------------|--------------|-----------|------------------------------------------------------|
| 1 d<br>M1/C1    | 1 d<br>M2/C2 | 1 d<br>M3/C3 | 4 d<br>M1/C1 | 4 d<br>M2/C2 | 4 d<br>M3/C3 | 7 d<br>M1/C1 | 7 d<br>M2/C2 | 7 d<br>M3/C3 | 10 d<br>M1/C1 | 10 d<br>M2/C2 | 10 d<br>M3/C3 |              |           |                                                      |
| 1.011           | 1.015        | 1.033        | 0.983        | 0.946        | 0.965        | 1.024        | 1.001        | 0.981        | 1.041         | 0.883         | 1.061         | O15460       | P4HA2     | Prolyl 4-hydroxylase subunit alpha-2                 |
| 0.973           | 1.000        | 1.007        | 1.007        | 1.027        | 1.002        | 0.972        | 0.970        | 1.004        | 0.990         | 0.974         | 1.000         | P48147       | PREP      | Prolyl endopeptidase                                 |
| 1.037           | 0.997        | 1.025        | 0.990        | 0.992        | 0.973        | 0.982        | 0.996        | 0.999        | 0.995         | 1.011         | 1.013         | Q4J6C6       | PREPL     | Prolyl endopeptidase-like                            |
| 1.075           | 1.014        | 1.051        | 0.999        | 0.965        | 1.016        | 0.984        | 1.035        | 0.998        | 1.046         | 1.008         | 1.049         | P05165       | PCCA      | Propionyl-CoA carboxylase alpha chain, mitochondrial |
| 1.021           | 1.034        | 1.047        | 0.988        | 0.939        | 1.015        | 1.041        | 1.051        | 1.028        | 1.045         | 0.997         | 1.063         | E7EX59       | PCCB      | Propionyl-CoA carboxylase beta chain, mitochondrial  |
| 0.758           | 0.907        | 0.883        | 1.007        | 1.153        | 1.039        | 1.232        | 0.958        | 1.021        | 1.261         | 1.145         | 1.201         | P07602       | PSAP      | Prosaposin                                           |
|                 |              |              | 1.040        | 0.968        | 0.972        | 1.067        | 1.233        | 1.022        | 1.128         | 1.142         | 0.961         | Q13258       | PTGDR     | Prostaglandin D2 receptor                            |
| 1.015           | 1.012        | 0.970        | 0.982        | 0.981        | 0.958        | 0.991        | 1.014        | 0.980        | 1.027         | 0.969         | 0.973         | Q9H7Z7       | PTGES2    | Prostaglandin E synthase 2                           |
| 1.121           | 0.995        | 0.977        | 1.003        | 1.221        | 0.961        | 1.022        | 0.864        | 1.029        | 0.974         | 0.982         | 0.970         | Q15185       | PTGES3    | Prostaglandin E synthase 3                           |
|                 |              |              | 0.868        | 0.945        | 0.986        | 0.981        | 0.994        | 1.030        | 0.928         | 1.079         | 1.150         | O14684       | PTGES     | Prostaglandin E synthase                             |
| 0.973           | 0.996        | 0.981        | 0.981        | 0.998        | 0.982        | 0.950        | 1.005        | 0.999        | 1.001         | 0.974         | 0.979         | Q14914       | PTGR1     | Prostaglandin reductase 1                            |
| 1.012           | 1.018        | 0.993        | 0.991        | 0.929        | 0.939        | 0.921        | 1.056        | 1.039        | 0.977         | 1.023         | 0.979         | Q8N8N7       | PTGR2     | Prostaglandin reductase 2                            |
| 1.090           | 1.057        | 1.010        | 1.041        | 0.987        | 1.065        | 1.094        | 1.046        | 0.975        | 1.029         | 0.989         | 1.031         | Q8N4Q0       | ZADH2     | Prostaglandin reductase 3                            |
| 0.991           | 1.048        | 0.957        | 0.989        | 0.954        | 1.009        | 0.974        | 1.063        | 1.009        | 0.973         | 1.031         | 1.027         | A0A0A0MT35   | FAM213B   | Prostamide/prostaglandin F synthase                  |
| 0.989           | 0.965        | 1.045        | 0.992        | 0.947        | 0.969        | 1.039        | 0.932        | 0.896        | 1.024         | 0.990         | 1.063         | Q86YD1       | PTOV1     | Prostate tumor-overexpressed gene 1 protein          |
|                 |              |              |              |              |              | 1.085        | 1.236        | 0.924        |               |               |               | Q9BSG0       | PRADC1    | Protease-associated domain-containing protein 1      |
| 1.138           | 0.965        | 0.995        | 1.128        | 0.988        | 1.000        | 1.243        | 0.974        | 0.988        | 1.081         | 0.995         | 1.027         | Q9BRP4       | PAAF1     | Proteasomal ATPase-associated factor 1               |
| 0.916           | 0.992        | 0.959        | 0.978        | 1.076        | 1.000        | 1.016        | 0.866        | 0.979        | 1.019         | 1.026         | 1.085         | Q16186       | ADRM1     | Proteasomal ubiquitin receptor ADRM1                 |
| 1.088           | 1.020        | 1.007        | 1.007        | 1.053        | 0.985        | 0.985        | 0.996        | 0.994        | 0.954         | 0.985         | 0.933         | Q06323       | PSME1     | Proteasome activator complex subunit 1               |
| 1.133           | 0.848        | 0.861        |              |              |              |              |              |              |               |               |               | HOYM70       | PSME2     | Proteasome activator complex subunit 2               |
| 1.040           | 1.015        | 1.042        | 1.020        | 1.093        | 1.033        | 0.957        | 1.023        | 1.016        | 0.964         | 1.011         | 0.996         | A0A087X1Z3   | PSME2     | Proteasome activator complex subunit 2               |
| 1.020           | 1.016        | 1.016        | 0.989        | 0.920        | 1.028        | 1.004        | 1.103        | 1.083        | 0.970         | 0.989         | 0.984         | Q14997       | PSME4     | Proteasome activator complex subunit 4               |
| 0.982           | 0.996        | 0.984        | 0.981        | 1.018        | 1.031        | 0.953        | 1.026        | 1.035        | 0.928         | 0.973         | 0.983         | O95456       | PSMG1     | Proteasome assembly chaperone 1                      |
| 0.899           | 1.027        | 0.969        | 1.089        | 1.053        | 0.980        | 1.068        | 1.056        | 1.045        | 0.991         | 0.973         | 0.986         | Q969U7       | PSMG2     | Proteasome assembly chaperone 2                      |
| 1.040           | 1.010        | 1.015        | 0.997        | 0.963        | 1.036        | 0.971        | 1.129        | 1.011        | 0.951         | 0.984         | 1.074         | Q9BT73       | PSMG3     | Proteasome assembly chaperone 3                      |
| 1.062           | 1.045        | 1.035        | 0.995        | 0.988        | 0.973        | 0.975        | 1.119        | 1.004        | 0.972         | 1.077         | 0.998         | Q92530       | PSMF1     | Proteasome inhibitor PI31 subunit                    |
| 0.949           | 0.991        | 1.010        | 0.950        | 0.914        | 0.945        | 0.919        | 1.031        | 0.971        | 0.907         | 0.933         | 1.020         | Q9Y244       | POMP      | Proteasome maturation protein                        |
| 1.045           | 1.024        | 0.980        | 1.003        | 1.002        | 1.002        | 0.995        | 1.109        | 1.018        | 0.977         | 0.990         | 0.943         | A0A024RA52   | PSMA2     | Proteasome subunit alpha type                        |
| 1.010           | 0.994        | 0.999        | 1.005        | 1.159        | 0.994        | 1.035        | 0.946        | 1.029        | 1.009         | 0.984         | 0.966         | G3V5Z7       | PSMA6     | Proteasome subunit alpha type                        |
| 1.005           | 0.999        | 0.955        | 1.003        | 0.968        | 0.988        | 1.002        | 1.003        | 0.966        | 0.998         | 0.981         | 0.947         | P25788       | PSMA3     | Proteasome subunit alpha type-3                      |
| 1.012           | 1.008        | 1.015        | 0.988        | 1.024        | 0.987        | 0.974        | 0.935        | 0.994        | 0.978         | 0.990         | 0.974         | P25789       | PSMA4     | Proteasome subunit alpha type-4                      |
| 1.021           | 1.020        | 0.987        | 1.007        | 0.993        | 0.989        | 0.995        | 1.073        | 0.984        | 0.998         | 1.010         | 1.004         | P28066       | PSMA5     | Proteasome subunit alpha type-5                      |
| 1.037           | 1.016        | 1.005        | 0.984        | 0.970        | 0.988        | 0.982        | 1.045        | 0.987        | 0.972         | 0.976         | 0.988         | O14818       | PSMA7     | Proteasome subunit alpha type-7                      |



| Abundance Ratio |              |              |              |              |              |              |              |              |               |               |               | Accession ID | Gene name | Protein Description                                       |
|-----------------|--------------|--------------|--------------|--------------|--------------|--------------|--------------|--------------|---------------|---------------|---------------|--------------|-----------|-----------------------------------------------------------|
| 1 d<br>M1/C1    | 1 d<br>M2/C2 | 1 d<br>M3/C3 | 4 d<br>M1/C1 | 4 d<br>M2/C2 | 4 d<br>M3/C3 | 7 d<br>M1/C1 | 7 d<br>M2/C2 | 7 d<br>M3/C3 | 10 d<br>M1/C1 | 10 d<br>M2/C2 | 10 d<br>M3/C3 |              |           |                                                           |
| 1.043           | 1.008        | 0.977        | 1.033        | 1.037        | 0.976        | 0.988        | 1.023        | 0.981        | 0.996         | 1.010         | 0.956         | P20618       | PSMB1     | Proteasome subunit beta type-1                            |
| 1.003           | 1.007        | 0.977        | 0.984        | 0.938        | 0.984        | 0.987        | 1.011        | 0.999        | 0.977         | 0.933         | 0.982         | P40306       | PSMB10    | Proteasome subunit beta type-10                           |
| 0.986           | 1.019        | 0.967        | 1.021        | 1.072        | 0.957        | 0.926        | 0.993        | 0.968        | 0.958         | 1.007         | 0.928         | P49721       | PSMB2     | Proteasome subunit beta type-2                            |
| 1.009           | 1.013        | 0.950        | 1.009        | 1.016        | 0.968        | 0.992        | 1.050        | 0.991        | 0.973         | 1.020         | 0.941         | P49720       | PSMB3     | Proteasome subunit beta type-3                            |
| 0.952           | 1.005        | 0.994        | 0.968        | 0.955        | 1.000        | 0.994        | 1.072        | 1.024        | 0.974         | 0.993         | 0.994         | P28070       | PSMB4     | Proteasome subunit beta type-4                            |
| 1.046           | 1.009        | 0.975        | 1.057        | 0.932        | 0.958        | 0.979        | 1.009        | 0.946        | 1.001         | 1.007         | 0.949         | P28074       | PSMB5     | Proteasome subunit beta type-5                            |
| 1.006           | 0.977        | 0.989        | 0.979        | 0.960        | 1.009        | 0.974        | 1.009        | 0.942        | 1.023         | 1.022         | 0.976         | P28072       | PSMB6     | Proteasome subunit beta type-6                            |
| 1.007           | 1.006        | 0.954        | 1.013        | 0.951        | 0.954        | 0.969        | 1.030        | 0.930        | 0.991         | 1.031         | 0.944         | Q99436       | PSMB7     | Proteasome subunit beta type-7                            |
| 1.042           | 1.008        | 1.009        | 1.046        | 1.030        | 0.997        | 1.020        | 0.977        | 0.980        | 0.964         | 0.947         | 0.956         | P28062       | PSMB8     | Proteasome subunit beta type-8                            |
| 1.008           | 0.999        | 0.976        | 1.002        | 0.970        | 0.993        | 0.979        | 1.044        | 0.992        | 0.974         | 0.964         | 1.001         | P28065       | PSMB9     | Proteasome subunit beta type-9                            |
| 0.967           | 0.896        | 0.966        |              |              |              | 1.255        | 1.268        | 1.020        | 0.950         | 0.913         | 0.965         | Q9NUX5       | POT1      | Protection of telomeres protein 1                         |
| 1.000           | 0.974        | 1.082        | 0.985        | 0.928        | 0.997        | 1.026        | 1.055        | 1.019        | 0.999         | 0.946         | 1.041         | P11171       | EPB41     | Protein 4.1                                               |
| 1.067           | 0.970        | 1.054        | 0.981        | 0.984        | 1.091        | 0.991        | 1.007        | 1.077        | 0.978         | 0.971         | 1.052         | Q9Y312       | AAR2      | Protein AAR2 homolog                                      |
| 1.068           | 0.972        | 1.010        | 0.969        | 0.954        | 0.993        | 0.973        | 1.040        | 1.012        | 0.975         | 1.018         | 1.018         | Q9NY61       | AATF      | Protein AATF                                              |
| 0.991           | 0.993        | 1.005        | 0.971        | 0.968        | 0.988        | 0.996        | 1.019        | 0.993        | 1.015         | 0.933         | 1.027         | Q8NFBV4      | ABHD11    | Protein ABHD11                                            |
| 1.090           | 1.016        | 0.986        | 1.005        | 0.973        | 0.954        | 0.965        | 1.044        | 0.970        | 0.987         | 0.982         | 0.906         | Q96IU4       | ABHD14B   | Protein ABHD14B                                           |
|                 |              |              |              |              |              | 1.115        | 1.451        | 1.035        |               |               |               | Q6UXT9       | ABHD15    | Protein ABHD15                                            |
| 1.316           | 1.316        | 1.189        | 1.187        | 1.084        | 1.144        | 0.972        | 1.090        | 1.062        |               |               |               | Q8TB40       | ABHD4     | Protein ABHD4                                             |
| 0.943           | 1.080        | 1.094        | 0.945        | 0.997        | 0.970        | 0.958        | 0.952        | 0.991        | 1.015         | 0.973         | 1.119         | A0A087WW39   | MLLT6     | Protein AF-17                                             |
| 1.043           | 0.906        | 0.988        |              |              |              |              |              |              |               |               |               | Q13015       | MLLT11    | Protein AF1q                                              |
| 0.949           | 0.977        | 0.985        | 0.994        | 0.972        | 1.025        | 0.988        | 0.993        | 0.992        | 1.041         | 1.021         | 1.018         | Q8IVF2       | AHNAK2    | Protein AHNAK2                                            |
|                 |              |              |              |              |              | 1.017        | 1.080        | 1.050        | 1.013         | 0.969         | 0.974         | Q8IY45       | AMN1      | Protein AMN1 homolog                                      |
|                 |              |              | 0.699        | 1.003        | 1.513        |              |              |              | 1.038         | 0.988         | 1.099         | Q9UNK9       | ANGEL1    | Protein angel homolog 1                                   |
| 0.918           | 0.931        | 1.040        | 1.005        | 1.058        | 1.003        | 1.003        | 1.034        | 1.077        | 0.996         | 1.048         | 1.097         | Q5VTE6       | ANGEL2    | Protein angel homolog 2                                   |
| 0.979           | 0.958        | 1.073        | 1.031        | 0.953        | 1.035        | 0.842        | 0.921        | 0.960        | 1.062         | 0.979         | 1.141         | A8K0B5       | ZBTB80S   | Protein archease                                          |
| 0.986           | 1.008        | 1.022        | 0.994        | 1.010        | 1.008        | 1.022        | 1.009        | 0.998        | 1.008         | 0.995         | 1.007         | Q7L592       | NDUFAF7   | Protein arginine methyltransferase NDUFAF7, mitochondrial |
| 1.011           | 0.996        | 0.988        | 1.013        | 1.037        | 0.989        | 1.033        | 1.001        | 1.049        | 1.004         | 1.020         | 0.997         | H7C2I1       | PRMT1     | Protein arginine N-methyltransferase 1                    |
| 1.006           | 1.038        | 1.029        | 1.037        | 0.905        | 1.054        |              |              |              |               |               |               | P55345       | PRMT2     | Protein arginine N-methyltransferase 2                    |
| 1.003           | 0.979        | 1.008        | 0.984        | 0.977        | 1.039        | 1.025        | 1.054        | 1.007        | 0.984         | 0.999         | 1.016         | O60678       | PRMT3     | Protein arginine N-methyltransferase 3                    |
| 1.047           | 0.996        | 0.999        | 1.005        | 0.979        | 0.987        | 1.026        | 1.008        | 0.990        | 1.004         | 0.977         | 0.957         | O14744       | PRMT5     | Protein arginine N-methyltransferase 5                    |
| 0.997           | 1.105        | 0.891        | 0.996        | 0.969        | 1.000        | 0.925        | 1.158        | 1.015        | 0.989         | 1.083         | 1.043         | Q96LA8       | PRMT6     | Protein arginine N-methyltransferase 6                    |
| 1.118           | 1.052        | 0.929        |              |              |              |              |              |              |               |               |               | Q9NVM4       | PRMT7     | Protein arginine N-methyltransferase 7                    |
| 1.030           | 1.051        | 0.975        | 1.013        | 0.970        | 0.976        | 1.006        | 1.043        | 0.998        | 0.962         | 1.003         | 1.007         | Q9UL18       | AGO1      | Protein argonaute-1                                       |

| Abundance Ratio |              |              |              |              |              |              |              |              |               |               |               | Accession ID | Gene name | Protein Description          |
|-----------------|--------------|--------------|--------------|--------------|--------------|--------------|--------------|--------------|---------------|---------------|---------------|--------------|-----------|------------------------------|
| 1 d<br>M1/C1    | 1 d<br>M2/C2 | 1 d<br>M3/C3 | 4 d<br>M1/C1 | 4 d<br>M2/C2 | 4 d<br>M3/C3 | 7 d<br>M1/C1 | 7 d<br>M2/C2 | 7 d<br>M3/C3 | 10 d<br>M1/C1 | 10 d<br>M2/C2 | 10 d<br>M3/C3 |              |           |                              |
| 1.038           | 1.014        | 1.002        | 1.037        | 0.970        | 0.989        | 1.019        | 1.092        | 1.016        | 1.022         | 1.055         | 1.036         | Q9UKV8       | AGO2      | Protein argonaute-2          |
| 0.944           | 0.994        | 1.039        | 1.012        | 0.969        | 0.943        | 0.990        | 1.216        | 0.910        | 0.934         | 0.971         | 1.023         | Q9H9G7       | AGO3      | Protein argonaute-3          |
| 1.024           | 1.038        | 1.041        | 1.003        | 0.945        | 1.018        | 0.993        | 1.002        | 1.028        | 1.012         | 1.000         | 1.063         | Q9NVM9       | ASUN      | Protein asunder homolog      |
| 1.076           | 0.931        | 1.022        | 0.936        | 0.948        | 0.992        | 1.065        | 1.022        | 0.925        | 1.105         | 0.997         | 0.984         | Q8N9N5       | BANP      | Protein BANP                 |
| 0.978           | 0.979        | 0.993        | 0.994        | 0.965        | 1.028        | 1.005        | 0.965        | 1.004        | 1.049         | 0.955         | 1.073         | Q9H694       | BICC1     | Protein bicaudal C homolog 1 |
| 0.862           | 1.059        | 0.829        | 0.907        | 0.937        | 0.978        | 1.040        | 0.880        | 1.068        | 0.722         | 0.690         | 1.096         | Q96G01       | BICD1     | Protein bicaudal D homolog 1 |
| 1.052           | 1.061        | 0.973        | 1.037        | 1.136        | 1.028        | 1.053        | 1.025        | 1.050        | 1.041         | 1.013         | 0.992         | P41223       | BUD31     | Protein BUD31 homolog        |
| 0.943           | 0.944        | 1.006        | 1.010        | 1.027        | 1.035        | 0.900        | 1.029        | 1.009        | 1.002         | 1.044         | 1.017         | Q99622       | C12orf57  | Protein C10                  |
| 1.083           | 0.987        | 1.057        | 0.994        | 1.370        | 0.965        | 0.981        | 0.933        | 1.155        |               |               |               | Q9NQ89       | C12orf4   | Protein C12orf4              |
| 1.047           | 1.003        | 1.036        | 1.154        | 0.955        | 1.045        | 1.107        | 0.869        | 1.082        | 1.033         | 1.013         | 1.155         | Q96NL8       | C8orf37   | Protein C8orf37              |
| 1.056           | 1.006        | 0.996        | 1.024        | 0.902        | 1.025        | 0.989        | 0.943        | 1.008        | 1.024         | 0.993         | 0.989         | Q9BT09       | CNPY3     | Protein canopy homolog 3     |
| 0.938           | 1.032        | 0.974        | 0.988        | 0.919        | 1.073        | 1.000        | 0.903        | 0.979        | 0.937         | 0.735         | 1.091         | Q8N129       | CNPY4     | Protein canopy homolog 4     |
| 1.061           | 1.038        | 1.039        | 0.919        | 0.949        | 0.970        | 0.905        | 0.918        | 1.021        | 1.108         | 0.969         | 1.114         | I3L2J0       | CIC       | Protein capicua homolog      |
| 1.013           | 0.988        | 1.035        | 1.020        | 1.029        | 1.050        | 0.996        | 0.923        | 1.035        | 1.060         | 1.038         | 1.209         | O15234       | CASC3     | Protein CASC3                |
| 0.969           | 0.995        | 1.023        | 1.003        | 0.942        | 0.987        | 1.033        | 1.043        | 0.970        | 1.087         | 1.022         | 1.121         | Q13948       | CUX1      | Protein CASP                 |
| 1.046           | 0.945        | 1.035        | 0.976        | 0.841        | 0.832        | 0.851        | 1.042        | 0.916        | 0.880         | 1.114         | 0.968         | A0A0A0MSU1   | RUNX1T1   | Protein CBFA2T1              |
|                 |              |              | 0.914        | 0.814        | 1.178        | 1.520        | 1.102        | 0.937        | 1.067         | 1.214         | 0.938         | Q4G0I0       | CCSMST1   | Protein CCSMST1              |
| 0.969           | 0.989        | 0.978        | 0.987        | 0.964        | 0.943        | 1.009        | 1.029        | 1.007        | 1.002         | 0.993         | 1.048         | Q9UKY7       | CDV3      | Protein CDV3 homolog         |
|                 |              |              | 0.982        | 0.937        | 1.054        | 0.979        | 1.011        | 0.970        | 1.118         | 1.048         | 1.227         | A8MTT3       | CEBPZOS   | Protein CEBPZOS              |
| 0.981           | 0.958        | 0.990        | 1.050        | 0.923        | 1.052        | 0.990        | 0.911        | 0.994        | 1.028         | 0.994         | 1.091         | Q96SW2       | CRBN      | Protein cereblon             |
| 1.040           | 1.052        | 1.077        | 1.018        | 0.959        | 1.006        | 1.004        | 1.141        | 0.953        | 0.962         | 0.997         | 0.966         | P14921       | ETS1      | Protein C-ets-1              |
| 0.922           | 0.983        | 0.979        | 1.004        | 1.116        | 1.055        | 1.084        | 0.931        | 1.020        | 1.040         | 1.004         | 1.080         | Q8WUH1       | CHURC1    | Protein Churchill            |
| 0.977           | 1.044        | 1.024        | 1.007        | 0.947        | 0.989        | 1.095        | 0.941        | 1.006        | 0.933         | 1.092         | 1.290         | A0A087X211   | KIAA1524  | Protein CIP2A                |
| 1.016           | 0.984        | 1.055        | 0.979        | 0.900        | 0.888        | 0.951        | 0.711        | 1.118        | 1.156         | 1.009         | 1.032         | Q2KHT3       | CLEC16A   | Protein CLEC16A              |
| 1.098           | 0.992        | 1.065        | 0.874        | 0.981        | 0.929        | 0.999        | 1.143        | 0.986        | 1.045         | 1.025         | 1.028         | Q9UBY8       | CLN8      | Protein CLN8                 |
| 1.016           | 1.006        | 0.976        | 1.043        | 1.110        | 1.105        | 1.083        | 1.103        | 1.055        | 1.047         | 1.053         | 1.046         | Q9BQ75       | CMSS1     | Protein CMSS1                |
| 0.922           | 0.929        | 0.933        | 0.992        | 0.884        | 1.065        | 0.946        | 1.158        | 1.017        | 0.937         | 1.053         | 1.068         | Q9P003       | CNIH4     | Protein cornichon homolog 4  |
| 1.018           | 1.481        | 0.984        | 0.991        | 0.721        | 1.180        | 1.101        | 1.275        | 1.079        |               |               |               | O75629       | CREG1     | Protein CREG1                |
| 0.973           | 0.906        | 0.901        | 0.934        | 0.913        | 0.920        | 0.934        | 0.946        | 0.891        | 0.813         | 0.958         | 0.784         | O00622       | CYR61     | Protein CYR61                |
| 1.174           | 0.969        | 1.110        | 1.018        | 0.824        | 1.012        | 0.782        | 0.926        | 0.874        | 0.683         | 0.825         | 0.571         | Q8NFT6       | DBF4B     | Protein DBF4 homolog B       |
| 1.021           | 0.953        | 1.014        | 1.017        | 0.963        | 0.988        | 0.975        | 0.997        | 1.054        | 1.005         | 1.004         | 1.085         | Q5TDH0       | DDI2      | Protein DDI1 homolog 2       |
| 0.994           | 0.979        | 0.975        | 0.972        | 0.927        | 0.931        | 0.942        | 0.992        | 0.934        | 0.934         | 0.971         | 0.912         | P35659       | DEK       | Protein DEK                  |
| 1.095           | 1.110        | 1.087        | 1.351        | 0.696        | 1.082        | 9.736        | 0.093        | 0.873        | 0.966         | 0.950         | 1.050         | Q8IWF6       | DENND6A   | Protein DENND6A              |
| 0.973           | 0.941        | 1.020        | 1.089        | 1.193        | 1.057        | 1.021        | 0.945        | 1.022        | 1.010         | 1.067         | 1.094         | Q96DF8       | DGCR14    | Protein DGCR14               |

| Abundance Ratio |              |              |              |              |              |              |              |              |               |               |               | Accession ID | Gene name | Protein Description                       |
|-----------------|--------------|--------------|--------------|--------------|--------------|--------------|--------------|--------------|---------------|---------------|---------------|--------------|-----------|-------------------------------------------|
| 1 d<br>M1/C1    | 1 d<br>M2/C2 | 1 d<br>M3/C3 | 4 d<br>M1/C1 | 4 d<br>M2/C2 | 4 d<br>M3/C3 | 7 d<br>M1/C1 | 7 d<br>M2/C2 | 7 d<br>M3/C3 | 10 d<br>M1/C1 | 10 d<br>M2/C2 | 10 d<br>M3/C3 |              |           |                                           |
| 0.959           | 0.978        | 0.966        | 1.011        | 0.892        | 1.182        | 0.994        | 0.827        | 1.107        | 1.037         | 1.026         | 1.103         | Q14129       | DGCR6     | Protein DGCR6                             |
| 0.999           | 1.010        | 1.012        | 1.037        | 0.992        | 1.009        | 1.012        | 0.967        | 0.994        | 1.003         | 0.892         | 1.047         | A0A0G2JH68   | DIAPH1    | Protein diaphanous homolog 1              |
|                 |              |              | 1.168        | 1.304        | 0.974        | 1.305        | 0.792        | 0.896        | 1.048         | 1.059         | 1.110         | C9J6U3       | DIAPH2    | Protein diaphanous homolog 2              |
| 0.931           | 0.983        | 0.923        |              |              |              | 1.099        | 1.251        | 1.238        | 0.846         | 0.894         | 1.229         | Q9NSV4       | DIAPH3    | Protein diaphanous homolog 3              |
| 1.008           | 1.026        | 0.996        | 0.976        | 0.970        | 0.925        | 0.985        | 1.056        | 0.964        | 0.974         | 0.981         | 0.989         | H7BZJ3       | PDIA3     | Protein disulfide-isomerase A3 (Fragment) |
| 1.024           | 1.021        | 0.990        | 1.010        | 0.983        | 0.987        | 0.969        | 1.011        | 0.964        | 0.968         | 0.996         | 0.942         | P30101       | PDIA3     | Protein disulfide-isomerase A3            |
| 0.983           | 1.020        | 0.979        | 1.006        | 0.973        | 0.993        | 0.982        | 1.029        | 0.972        | 0.976         | 1.008         | 0.940         | P13667       | PDIA4     | Protein disulfide-isomerase A4            |
| 1.018           | 1.010        | 1.006        | 1.001        | 0.998        | 0.981        | 0.996        | 1.044        | 1.017        | 0.988         | 0.972         | 1.022         | Q14554       | PDIA5     | Protein disulfide-isomerase A5            |
| 0.998           | 1.007        | 1.000        | 1.003        | 1.007        | 1.026        | 0.995        | 1.031        | 0.999        | 0.959         | 0.979         | 0.986         | P07237       | P4HB      | Protein disulfide-isomerase               |
| 0.910           | 0.976        | 0.981        | 0.973        | 0.923        | 1.006        | 1.014        | 1.020        | 1.003        | 1.023         | 1.042         | 1.010         | Q96J17       | TMX3      | Protein disulfide-isomerase TMX3          |
| 1.055           | 0.994        | 0.982        | 1.022        | 1.117        | 0.989        | 1.008        | 0.943        | 0.996        | 0.967         | 1.015         | 0.925         | Q99497       | PARK7     | Protein DJ-1                              |
| 1.145           | 0.967        | 1.028        | 1.050        | 0.942        | 0.994        | 1.039        | 1.087        | 1.169        | 1.028         | 0.926         | 1.055         | Q9Y3R5       | DOPEY2    | Protein dopey-2                           |
| 1.039           | 0.971        | 1.047        | 1.019        | 0.891        | 1.061        | 1.038        | 1.026        | 0.991        | 1.083         | 1.006         | 1.041         | Q9BVM2       | DPCD      | Protein DPCD                              |
| 1.002           | 1.121        | 1.029        | 0.945        | 1.048        | 1.015        | 0.866        | 0.982        | 0.948        | 0.960         | 0.978         | 0.887         | Q9C005       | DPY30     | Protein dpy-30 homolog                    |
| 1.013           | 0.960        | 0.994        | 1.021        | 1.019        | 1.042        | 0.969        | 1.105        | 1.076        | 0.980         | 1.019         | 1.010         | Q01658       | DR1       | Protein Dr1                               |
| 0.980           | 1.161        | 1.175        | 0.985        | 0.949        | 1.044        | 1.026        | 1.089        | 1.067        | 0.957         | 0.946         | 0.897         | Q9H8V3       | ECT2      | Protein ECT2                              |
| 0.937           | 1.004        | 1.051        | 0.993        | 0.913        | 1.048        | 1.002        | 1.071        | 0.989        | 0.979         | 0.980         | 1.060         | A0A1B0GUZ7   | EFR3A     | Protein EFR3 homolog A                    |
| 0.869           | 1.129        | 1.082        | 1.070        | 1.109        | 1.178        | 1.126        | 1.024        | 1.113        |               |               |               | P0C7U0       | ELFN1     | Protein ELFN1                             |
| 1.117           | 0.771        | 0.935        |              |              |              |              |              |              |               |               |               | A0A075B6E5   | ENAH      | Protein enabled homolog (Fragment)        |
| 1.012           | 1.016        | 0.998        | 0.991        | 0.991        | 1.004        | 0.965        | 0.947        | 0.978        | 0.963         | 1.026         | 0.998         | A0A0U1RRM6   | ENAH      | Protein enabled homolog                   |
| 1.002           | 1.052        | 0.981        | 0.967        | 1.039        | 1.028        | 0.959        | 0.930        | 0.961        | 1.086         | 1.037         | 1.063         | Q03111       | MLLT1     | Protein ENL                               |
| 0.940           | 1.010        | 0.994        | 1.006        | 0.954        | 0.988        | 0.980        | 1.022        | 0.989        | 1.009         | 1.023         | 0.991         | P49257       | LMAN1     | Protein ERGIC-53                          |
|                 |              |              | 0.910        | 1.017        | 1.070        |              |              |              |               |               |               | Q9H8M9       | EVA1A     | Protein eva-1 homolog A                   |
|                 |              |              | 1.223        | 0.822        | 0.938        |              |              |              |               |               |               | Q9NVM1       | EVA1B     | Protein eva-1 homolog B                   |
| 1.066           | 1.086        | 1.091        |              |              |              |              |              |              | 1.192         | 0.975         | 0.948         | Q5T1H1       | EYS       | Protein eyes shut homolog                 |
| 1.059           | 1.022        | 1.017        | 1.052        | 0.924        | 0.914        | 1.053        | 1.113        | 1.018        | 0.944         | 0.876         | 1.026         | Q96PZ2       | FAM111A   | Protein FAM111A                           |
| 0.999           | 0.881        | 1.131        | 1.402        | 0.683        | 1.490        | 1.137        | 0.992        | 0.973        | 1.077         | 1.009         | 1.117         | Q6SJ93       | FAM111B   | Protein FAM111B                           |
| 1.031           | 1.010        | 1.034        | 0.989        | 0.998        | 1.022        | 0.983        | 1.009        | 1.025        | 0.986         | 1.040         | 1.034         | Q9NRY5       | FAM114A2  | Protein FAM114A2                          |
| 0.969           | 0.915        | 1.073        | 1.030        | 0.916        | 1.015        | 0.960        | 1.023        | 1.017        | 0.931         | 0.983         | 1.041         | Q6P1L5       | FAM117B   | Protein FAM117B                           |
| 1.021           | 1.043        | 0.997        | 0.990        | 1.000        | 0.994        | 1.062        | 0.977        | 1.085        | 1.037         | 1.072         | 1.051         | Q9NWS6       | FAM118A   | Protein FAM118A                           |
| 1.004           | 0.982        | 1.016        | 0.959        | 0.949        | 1.012        | 0.953        | 1.035        | 1.025        | 1.064         | 1.043         | 1.023         | Q9BPY3       | FAM118B   | Protein FAM118B                           |
|                 |              |              | 0.962        | 0.753        | 1.063        | 0.955        | 1.185        | 0.988        |               |               |               | Q96E09       | FAM122A   | Protein FAM122A                           |
| 1.157           | 0.972        | 1.081        | 0.965        | 0.993        | 1.247        | 1.050        | 1.086        | 1.078        | 0.987         | 0.975         | 1.036         | G1UD79       | SPACIA2   | Protein FAM122B                           |
|                 |              |              | 1.051        | 0.786        | 1.030        |              |              |              |               |               |               | Q8IXS8       | FAM126B   | Protein FAM126B                           |

| Abundance Ratio |              |              |              |              |              |              |              |              |               |               |               | Accession ID | Gene name | Protein Description |
|-----------------|--------------|--------------|--------------|--------------|--------------|--------------|--------------|--------------|---------------|---------------|---------------|--------------|-----------|---------------------|
| 1 d<br>M1/C1    | 1 d<br>M2/C2 | 1 d<br>M3/C3 | 4 d<br>M1/C1 | 4 d<br>M2/C2 | 4 d<br>M3/C3 | 7 d<br>M1/C1 | 7 d<br>M2/C2 | 7 d<br>M3/C3 | 10 d<br>M1/C1 | 10 d<br>M2/C2 | 10 d<br>M3/C3 |              |           |                     |
| 1.145           | 1.051        | 1.006        | 1.021        | 1.046        | 0.988        | 0.957        | 1.061        | 0.936        | 0.967         | 1.082         | 0.911         | A6ZKI3       | FAM127A   | Protein FAM127A     |
|                 |              |              |              |              |              |              |              |              | 0.764         | 1.129         | 0.809         | Q9BWD3       | FAM127B   | Protein FAM127B     |
| 1.046           | 0.989        | 0.962        | 1.008        | 0.960        | 1.008        | 1.009        | 0.975        | 1.013        | 0.886         | 0.955         | 1.083         | Q5BKY9       | FAM133B   | Protein FAM133B     |
| 1.005           | 0.844        | 1.035        | 1.003        | 0.862        | 0.973        | 0.993        | 0.845        | 0.998        | 1.109         | 0.980         | 1.050         | Q8NC44       | FAM134A   | Protein FAM134A     |
| 1.038           | 0.992        | 1.078        | 1.036        | 0.903        | 1.115        | 1.058        | 1.015        | 1.004        | 1.136         | 1.004         | 1.090         | Q86VR2       | FAM134C   | Protein FAM134C     |
| 0.898           | 0.991        | 1.106        | 0.995        | 0.799        | 1.176        |              |              |              |               |               |               | Q9P2D6       | FAM135A   | Protein FAM135A     |
| 0.901           | 0.951        | 0.998        | 0.947        | 1.073        | 0.999        | 1.013        | 0.725        | 0.964        | 1.021         | 0.980         | 1.018         | Q96C01       | FAM136A   | Protein FAM136A     |
|                 |              |              |              |              |              | 1.000        | 1.105        | 1.137        | 0.959         | 0.911         | 0.981         | Q05DH4       | FAM160A1  | Protein FAM160A1    |
| 1.043           | 1.034        | 1.072        | 0.949        | 0.919        | 1.036        | 0.974        | 1.105        | 1.040        | 0.943         | 0.979         | 0.983         | Q5W0V3       | FAM160B1  | Protein FAM160B1    |
| 1.002           | 0.929        | 1.067        |              |              |              | 0.935        | 1.041        | 1.111        |               |               |               | Q86V87       | FAM160B2  | Protein FAM160B2    |
| 1.092           | 0.996        | 1.001        | 0.959        | 0.952        | 0.938        | 0.949        | 1.032        | 0.951        | 0.883         | 1.014         | 0.901         | Q96A26       | FAM162A   | Protein FAM162A     |
| 1.063           | 1.036        | 1.014        | 1.082        | 1.032        | 1.014        | 1.037        | 0.959        | 0.878        | 1.167         | 1.020         | 0.887         | Q92567       | FAM168A   | Protein FAM168A     |
|                 |              |              | 0.952        | 0.852        | 1.037        |              |              |              |               |               |               | Q5VUB5       | FAM171A1  | Protein FAM171A1    |
| 1.015           | 1.016        | 0.998        | 0.994        | 0.994        | 1.019        | 1.004        | 1.006        | 1.129        | 1.048         | 0.996         | 1.014         | Q8WUF8       | FAM172A   | Protein FAM172A     |
| 0.831           | 0.726        | 0.891        | 1.001        | 0.923        | 0.939        | 1.029        | 0.961        | 1.104        |               |               |               | Q6P4H8       | FAM173B   | Protein FAM173B     |
| 1.020           | 1.029        | 1.006        | 1.040        | 1.040        | 1.057        | 1.089        | 0.989        | 1.060        | 1.073         | 1.000         | 1.082         | Q9GZU8       | FAM192A   | Protein FAM192A     |
|                 |              |              |              |              |              |              |              |              | 1.010         | 1.066         | 0.907         | A0A1B0GVL4   | FAM193A   | Protein FAM193A     |
| 0.866           | 1.034        | 1.206        |              |              |              |              |              |              |               |               |               | Q96PV7       | FAM193B   | Protein FAM193B     |
| 1.380           | 0.687        | 1.057        |              |              |              |              |              |              |               |               |               | Q6PEV8       | FAM199X   | Protein FAM199X     |
| 1.000           | 1.019        | 1.032        | 1.025        | 0.967        | 1.071        | 0.968        | 1.080        | 1.000        | 0.981         | 1.027         | 1.027         | Q9NSI2       | FAM207A   | Protein FAM207A     |
| 0.916           | 1.015        | 1.280        | 1.006        | 0.935        | 1.067        | 1.061        | 1.023        | 0.906        | 1.073         | 1.142         | 0.963         | Q5VWN6       | FAM208B   | Protein FAM208B     |
| 1.122           | 1.104        | 0.966        | 1.012        | 0.942        | 0.934        | 0.983        | 1.135        | 0.979        | 0.955         | 0.982         | 0.993         | Q96ND0       | FAM210A   | Protein FAM210A     |
| 1.064           | 1.026        | 0.935        | 1.064        | 0.859        | 1.043        | 1.076        | 1.140        | 0.972        | 1.065         | 1.090         | 0.967         | Q96KR6       | FAM210B   | Protein FAM210B     |
| 1.009           | 0.996        | 1.009        | 1.055        | 0.953        | 1.094        | 1.086        | 1.013        | 0.996        | 1.146         | 1.017         | 1.178         | Q9H0X4       | FAM234A   | Protein FAM234A     |
|                 |              |              | 1.066        | 0.964        | 1.106        | 1.170        | 1.040        | 1.096        | 1.147         | 1.068         | 1.192         | A2RU67       | FAM234B   | Protein FAM234B     |
| 1.193           | 0.965        | 1.030        | 0.869        | 1.005        | 1.139        | 1.028        | 1.095        | 0.986        | 1.175         | 0.911         | 1.028         | Q9Y421       | FAM32A    | Protein FAM32A      |
| 0.926           | 0.996        | 0.948        | 0.967        | 0.935        | 1.034        | 0.993        | 1.108        | 0.963        | 0.986         | 1.027         | 0.980         | Q92520       | FAM3C     | Protein FAM3C       |
| 1.053           | 0.939        | 1.041        | 1.050        | 0.914        | 0.986        | 1.003        | 1.083        | 0.999        | 0.995         | 0.964         | 0.977         | Q8TCE6       | FAM45A    | Protein FAM45A      |
| 0.993           | 1.003        | 1.012        | 0.996        | 0.886        | 1.014        | 0.993        | 0.998        | 0.968        | 1.115         | 1.071         | 1.045         | Q9NUQ9       | FAM49B    | Protein FAM49B      |
| 0.924           | 0.998        | 0.975        | 0.972        | 0.964        | 1.006        | 1.003        | 1.029        | 1.008        | 0.980         | 1.006         | 0.986         | Q14320       | FAM50A    | Protein FAM50A      |
| 1.027           | 1.037        | 1.038        | 1.007        | 1.082        | 1.136        | 1.065        | 0.955        | 1.061        | 1.175         | 1.053         | 1.104         | Q8TBR7       | FAM57A    | Protein FAM57A      |
| 0.763           | 1.754        | 1.026        | 1.189        | 0.915        | 0.868        | 0.832        | 1.094        | 0.991        | 0.971         | 0.932         | 1.019         | Q9NP50       | FAM60A    | Protein FAM60A      |
|                 |              |              |              |              |              |              |              |              | 1.031         | 0.999         | 1.333         | Q8TAV0       | FAM76A    | Protein FAM76A      |
| 1.023           | 0.925        | 1.037        | 1.000        | 0.902        | 1.136        | 0.954        | 0.880        | 0.958        | 1.084         | 0.942         | 1.108         | Q5HYJ3       | FAM76B    | Protein FAM76B      |

| Abundance Ratio |              |              |              |              |              |              |              |              |               |               |               | Accession ID | Gene name | Protein Description                                                        |
|-----------------|--------------|--------------|--------------|--------------|--------------|--------------|--------------|--------------|---------------|---------------|---------------|--------------|-----------|----------------------------------------------------------------------------|
| 1 d<br>M1/C1    | 1 d<br>M2/C2 | 1 d<br>M3/C3 | 4 d<br>M1/C1 | 4 d<br>M2/C2 | 4 d<br>M3/C3 | 7 d<br>M1/C1 | 7 d<br>M2/C2 | 7 d<br>M3/C3 | 10 d<br>M1/C1 | 10 d<br>M2/C2 | 10 d<br>M3/C3 |              |           |                                                                            |
| 0.943           | 1.024        | 0.956        | 0.975        | 1.005        | 1.108        | 0.978        | 0.892        | 1.019        | 1.015         | 0.921         | 1.114         | Q5T0W9       | FAM83B    | Protein FAM83B                                                             |
| 0.927           | 0.964        | 1.192        | 0.875        | 0.941        | 0.994        | 1.030        | 0.895        | 0.998        | 1.068         | 0.925         | 1.033         | A6ND36       | FAM83G    | Protein FAM83G                                                             |
| 1.043           | 1.020        | 1.002        | 1.154        | 0.990        | 0.999        | 0.989        | 1.079        | 1.005        | 0.994         | 0.911         | 1.055         | Q6ZRV2       | FAM83H    | Protein FAM83H                                                             |
| 1.072           | 1.043        | 1.012        | 1.011        | 0.950        | 0.998        | 1.029        | 1.096        | 0.982        | 1.008         | 0.996         | 1.013         | Q96KN1       | FAM84B    | Protein FAM84B                                                             |
| 1.017           | 1.054        | 1.004        | 0.886        | 0.860        | 0.958        | 0.890        | 1.020        | 0.952        | 0.896         | 0.901         | 1.152         | Q96GI7       | FAM89A    | Protein FAM89A                                                             |
| 1.080           | 1.023        | 1.027        | 1.001        | 0.918        | 1.105        | 0.991        | 0.989        | 1.055        | 1.265         | 1.374         | 1.040         | Q8N5H3       | FAM89B    | Protein FAM89B                                                             |
| 0.857           | 0.964        | 0.960        | 0.980        | 0.862        | 1.074        | 1.015        | 1.088        | 0.859        | 1.260         | 1.044         | 1.041         | Q9UBU6       | FAM8A1    | Protein FAM8A1                                                             |
| 1.020           | 0.973        | 1.030        | 0.975        | 1.034        | 1.017        | 1.003        | 0.965        | 1.013        | 1.045         | 0.971         | 1.034         | Q658Y4       | FAM91A1   | Protein FAM91A1                                                            |
| 1.313           | 0.871        | 0.836        |              |              |              | 0.999        | 1.115        | 1.167        |               |               |               | A1XBS5       | FAM92A    | Protein FAM92A                                                             |
| 1.032           | 0.973        | 1.022        | 1.001        | 1.022        | 0.994        | 1.002        | 1.030        | 0.977        | 0.991         | 1.028         | 1.040         | Q8NCA5       | FAM98A    | Protein FAM98A                                                             |
| 0.935           | 1.007        | 1.037        | 0.970        | 0.974        | 1.101        | 1.030        | 1.004        | 1.072        | 1.028         | 0.989         | 1.047         | Q17RN3       | FAM98C    | Protein FAM98C                                                             |
| 1.037           | 0.980        | 1.039        | 0.986        | 1.080        | 0.956        | 0.986        | 0.985        | 1.059        | 0.892         | 1.097         | 0.953         | Q92636       | NSMAF     | Protein FAN                                                                |
| 1.081           | 0.947        | 1.243        |              |              |              |              |              |              |               |               |               | Q68CZ1       | RPGRIP1L  | Protein fantom                                                             |
| 1.054           | 1.032        | 1.011        | 1.057        | 1.005        | 0.967        | 1.005        | 1.099        | 0.976        | 1.028         | 1.002         | 0.984         | P49356       | FNTB      | Protein farnesyltransferase subunit beta                                   |
| 1.024           | 0.979        | 0.998        | 0.983        | 1.015        | 1.076        | 1.029        | 1.048        | 1.044        | 1.029         | 0.963         | 1.053         | P49354       | FNTA      | Protein farnesyltransferase/geranylgeranyltransferase type-1 subunit alpha |
| 0.935           | 0.996        | 1.147        | 0.917        | 1.035        | 1.132        | 1.028        | 0.834        | 0.959        |               |               |               | Q9UK73       | FEM1B     | Protein fem-1 homolog B                                                    |
| 1.081           | 0.966        | 1.064        | 1.061        | 0.995        | 0.978        | 1.038        | 1.346        | 0.928        | 0.966         | 1.015         | 0.971         | J3KS54       | FLII      | Protein flightless-1 homolog                                               |
| 0.987           | 1.000        | 1.006        | 0.999        | 0.991        | 1.018        | 1.012        | 1.015        | 1.020        | 1.014         | 0.983         | 1.043         | Q13045       | FLII      | Protein flightless-1 homolog                                               |
| 1.053           | 1.058        | 1.078        | 1.041        | 1.023        | 1.012        | 1.025        | 0.966        | 0.902        | 1.078         | 1.035         | 1.126         | Q96HJ9       | FMC1      | Protein FMC1 homolog                                                       |
|                 |              |              | 1.279        | 1.009        | 0.893        |              |              |              | 1.033         | 1.153         | 1.093         | Q70Z53       | FRA10AC1  | Protein FRA10AC1                                                           |
| 1.042           | 0.984        | 0.993        | 1.033        | 1.045        | 1.006        | 1.042        | 0.966        | 1.016        | 1.025         | 1.041         | 1.024         | Q14331       | FRG1      | Protein FRG1                                                               |
| 1.004           | 0.989        | 1.009        | 0.970        | 0.964        | 1.000        | 0.973        | 1.048        | 0.993        | 0.997         | 0.970         | 1.066         | O94915       | FRYL      | Protein furry homolog-like                                                 |
| 0.994           | 0.962        | 1.015        | 0.991        | 0.945        | 1.048        | 0.990        | 0.861        | 0.986        | 1.026         | 1.004         | 1.022         | O94992       | HEXIM1    | Protein HEXIM1                                                             |
| 1.027           | 0.993        | 1.040        | 1.014        | 0.905        | 0.978        | 1.064        | 1.060        | 1.072        | 1.047         | 1.036         | 1.055         | Q9BTY7       | HGH1      | Protein HGH1 homolog                                                       |
|                 |              |              | 0.999        | 0.980        | 0.945        |              |              |              |               |               |               | Q8IV36       | HID1      | Protein HID1                                                               |
| 1.017           | 1.012        | 1.008        | 1.036        | 1.036        | 0.964        | 1.033        | 1.112        | 1.026        | 1.015         | 1.017         | 1.010         | Q53FT3       | HIKESHI   | Protein Hikeshi                                                            |
| 1.076           | 0.970        | 1.064        | 0.963        | 0.928        | 1.105        | 1.032        | 0.998        | 0.987        |               |               |               | P54198       | HIRA      | Protein HIRA                                                               |
| 1.055           | 0.969        | 1.058        | 1.023        | 0.984        | 1.004        | 0.974        | 1.009        | 1.016        | 0.990         | 0.975         | 1.075         | Q9UJC3       | HOOK1     | Protein Hook homolog 1                                                     |
| 1.018           | 1.005        | 1.043        | 0.974        | 0.968        | 1.036        | 0.999        | 1.010        | 1.013        | 1.047         | 1.007         | 1.054         | Q86VS8       | HOOK3     | Protein Hook homolog 3                                                     |
| 0.988           | 0.978        | 1.065        | 1.038        | 0.929        | 1.036        | 0.969        | 1.114        | 1.024        | 1.083         | 1.014         | 1.139         | Q9P2X3       | IMPACT    | Protein IMPACT                                                             |
| 0.986           | 1.001        | 1.012        | 0.977        | 0.971        | 1.005        | 0.988        | 0.995        | 0.986        | 0.987         | 1.002         | 1.049         | Q96ST2       | IWS1      | Protein IWS1 homolog                                                       |
| 1.144           | 1.027        | 1.089        | 1.050        | 0.954        | 1.089        | 1.002        | 0.988        | 1.142        | 0.969         | 1.095         | 1.039         | Q6IE81       | JADE1     | Protein Jade-1                                                             |
| 0.951           | 1.055        | 0.634        | 0.780        | 1.075        | 1.302        |              |              |              | 1.091         | 0.908         | 1.097         | Q92613       | JADE3     | Protein Jade-3                                                             |

| Abundance Ratio |              |              |              |              |              |              |              |              |               |               |               | Accession ID | Gene name | Protein Description                                               |
|-----------------|--------------|--------------|--------------|--------------|--------------|--------------|--------------|--------------|---------------|---------------|---------------|--------------|-----------|-------------------------------------------------------------------|
| 1 d<br>M1/C1    | 1 d<br>M2/C2 | 1 d<br>M3/C3 | 4 d<br>M1/C1 | 4 d<br>M2/C2 | 4 d<br>M3/C3 | 7 d<br>M1/C1 | 7 d<br>M2/C2 | 7 d<br>M3/C3 | 10 d<br>M1/C1 | 10 d<br>M2/C2 | 10 d<br>M3/C3 |              |           |                                                                   |
| 1.156           | 1.279        | 1.045        |              |              |              |              |              |              | 0.866         | 0.835         | 0.889         | P78504       | JAG1      | Protein jagged-1                                                  |
| 0.911           | 0.982        | 1.048        | 0.968        | 0.899        | 1.022        | 0.975        | 0.973        | 1.032        | 1.077         | 1.028         | 1.103         | Q8N5M9       | JAGN1     | Protein jagunal homolog 1                                         |
| 1.010           | 1.323        | 1.055        |              |              |              |              |              |              |               |               |               | Q9H799       | C5orf42   | Protein JBTS17                                                    |
|                 |              |              |              |              |              | 1.334        | 0.874        | 1.087        | 1.123         | 1.019         | 0.954         | O76095       | JTB       | Protein JTB                                                       |
| 1.044           | 0.968        | 1.100        | 1.072        | 0.958        | 1.032        | 1.027        | 1.072        | 1.014        | 1.073         | 1.049         | 1.064         | O15037       | KHNYN     | Protein KHNYN                                                     |
| 1.088           | 1.097        | 1.116        | 0.937        | 0.956        | 1.041        | 0.953        | 0.979        | 0.991        | 0.939         | 0.965         | 1.071         | Q14667       | KIAA0100  | Protein KIAA0100                                                  |
|                 |              |              | 1.119        | 0.957        | 0.971        |              |              |              |               |               |               | O60303       | KIAA0556  | Protein KIAA0556                                                  |
| 0.959           | 1.001        | 1.027        | 0.984        | 0.956        | 1.039        | 0.928        | 0.942        | 0.996        | 0.999         | 1.041         | 0.985         | P17252       | PRKCA     | Protein kinase C alpha type                                       |
| 0.951           | 0.986        | 0.991        | 0.991        | 0.989        | 0.975        | 0.995        | 0.962        | 0.988        | 1.013         | 0.955         | 1.029         | Q9UNF0       | PACSIN2   | Protein kinase C and casein kinase substrate in neurons protein 2 |
| 1.032           | 0.969        | 1.035        | 1.008        | 0.957        | 0.987        | 0.984        | 0.994        | 1.022        | 1.007         | 0.976         | 1.045         | Q9UKS6       | PACSIN3   | Protein kinase C and casein kinase substrate in neurons protein 3 |
| 0.980           | 1.005        | 1.017        | 0.977        | 0.975        | 0.997        | 0.979        | 0.990        | 1.000        | 1.003         | 0.964         | 0.971         | Q05655       | PRKCD     | Protein kinase C delta type                                       |
| 1.020           | 0.920        | 0.825        | 0.934        | 0.855        | 1.097        | 0.946        | 0.897        | 1.063        | 1.087         | 0.934         | 1.190         | Q02156       | PRKCE     | Protein kinase C epsilon type                                     |
| 1.043           | 0.858        | 1.034        | 1.032        | 0.979        | 1.014        | 1.002        | 0.996        | 0.982        | 1.032         | 1.007         | 1.029         | P41743       | PRKCI     | Protein kinase C iota type                                        |
| 0.965           | 1.017        | 1.042        | 0.999        | 0.941        | 0.978        | 1.003        | 1.000        | 1.055        | 1.021         | 0.978         | 1.049         | Q05513       | PRKCZ     | Protein kinase C zeta type                                        |
| 0.962           | 0.948        | 0.997        | 0.993        | 0.871        | 1.060        | 0.901        | 1.217        | 0.920        | 0.963         | 1.045         | 1.036         | Q9NVR5       | DNAAF2    | Protein kintoun                                                   |
| 0.783           | 0.995        | 0.895        | 0.876        | 0.872        | 1.037        | 0.978        | 1.075        | 0.999        | 0.928         | 0.902         | 0.947         | Q8TBQ9       | TMEM167A  | Protein kish-A                                                    |
| 1.006           | 1.050        | 1.055        | 1.029        | 0.908        | 0.996        | 1.074        | 1.085        | 1.053        | 0.990         | 1.036         | 1.002         | Q9NRX6       | TMEM167B  | Protein kish-B                                                    |
| 1.022           | 0.981        | 1.009        | 0.976        | 0.943        | 1.010        | 1.010        | 0.998        | 1.023        | 1.018         | 1.007         | 1.071         | Q8N9T8       | KRI1      | Protein KRI1 homolog                                              |
| 1.064           | 1.018        | 0.970        | 1.035        | 0.963        | 1.046        | 1.050        | 1.103        | 0.972        | 1.088         | 0.999         | 1.005         | Q96EK9       | KTI12     | Protein KTI12 homolog                                             |
| 1.001           | 0.828        | 1.070        | 1.029        | 1.039        | 1.090        |              |              |              | 0.822         | 0.574         | 1.063         | A4D1U4       | LCHN      | Protein LCHN                                                      |
| 0.992           | 1.013        | 1.021        | 1.028        | 0.933        | 0.999        | 1.074        | 1.045        | 1.033        | 1.053         | 1.152         | 1.095         | Q969X1       | TMBIM1    | Protein lifeguard 3                                               |
|                 |              |              |              |              |              |              |              |              | 1.029         | 1.053         | 1.197         | Q96GY3       | LIN37     | Protein lin-37 homolog                                            |
|                 |              |              | 1.095        | 0.960        | 1.117        |              |              |              |               |               |               | Q52LA3       | LIN52     | Protein lin-52 homolog                                            |
| 1.094           | 1.082        | 0.981        | 1.040        | 0.943        | 0.912        | 1.120        | 1.083        | 1.046        | 0.910         | 0.974         | 0.967         | Q6MZP7       | LIN54     | Protein lin-54 homolog                                            |
| 0.962           | 0.946        | 0.996        | 0.964        | 0.982        | 1.019        | 1.012        | 0.957        | 1.025        | 1.028         | 1.004         | 1.030         | Q9NUP9       | LIN7C     | Protein lin-7 homolog C                                           |
| 1.063           | 0.934        | 1.142        | 1.097        | 1.054        | 1.054        | 1.140        | 1.047        | 1.136        | 0.855         | 1.024         | 0.931         | HOY322       | LIN9      | Protein lin-9 homolog (Fragment)                                  |
| 1.022           | 1.050        | 1.043        | 1.154        | 1.097        | 1.112        | 1.282        | 1.537        | 1.200        | 1.200         | 1.175         | 1.125         | Q9BRT6       | LLPH      | Protein LLP homolog                                               |
| 1.000           | 0.998        | 1.007        | 0.995        | 0.972        | 0.984        | 1.000        | 0.971        | 1.017        | 1.107         | 1.053         | 1.021         | Q8ND56       | LSM14A    | Protein LSM14 homolog A                                           |
| 0.961           | 1.035        | 0.915        | 1.026        | 1.069        | 1.015        | 0.998        | 1.141        | 1.029        | 0.939         | 1.007         | 1.035         | Q5TBP9       | LSM14B    | Protein LSM14 homolog B (Fragment)                                |
| 1.013           | 1.027        | 1.008        | 1.005        | 1.004        | 1.103        | 1.009        | 1.069        | 1.085        | 1.026         | 1.064         | 1.128         | Q9BX40       | LSM14B    | Protein LSM14 homolog B                                           |
| 0.984           | 0.979        | 0.987        | 0.988        | 0.984        | 1.029        | 0.952        | 1.021        | 1.039        | 1.006         | 1.045         | 1.093         | Q96GA3       | LTV1      | Protein LTV1 homolog                                              |
| 0.950           | 0.982        | 1.017        | 0.980        | 0.927        | 0.990        | 1.003        | 1.000        | 0.981        | 1.060         | 1.038         | 1.047         | Q86UE4       | MTDH      | Protein LYRIC                                                     |
| 1.065           | 0.919        | 1.002        | 1.066        | 0.919        | 1.066        | 1.047        | 1.002        | 0.993        | 1.073         | 0.979         | 0.966         | Q96A72       | MAGOHB    | Protein mago nashi homolog 2                                      |

| Abundance Ratio |              |              |              |              |              |              |              |              |               |               |               | Accession ID | Gene name | Protein Description                                                 |
|-----------------|--------------|--------------|--------------|--------------|--------------|--------------|--------------|--------------|---------------|---------------|---------------|--------------|-----------|---------------------------------------------------------------------|
| 1 d<br>M1/C1    | 1 d<br>M2/C2 | 1 d<br>M3/C3 | 4 d<br>M1/C1 | 4 d<br>M2/C2 | 4 d<br>M3/C3 | 7 d<br>M1/C1 | 7 d<br>M2/C2 | 7 d<br>M3/C3 | 10 d<br>M1/C1 | 10 d<br>M2/C2 | 10 d<br>M3/C3 |              |           |                                                                     |
| 1.012           | 1.002        | 0.990        | 1.037        | 1.011        | 1.003        | 1.040        | 1.063        | 1.039        | 1.067         | 1.060         | 0.969         | Q9BXY0       | MAK16     | Protein MAK16 homolog                                               |
| 1.036           | 0.916        | 1.067        | 0.990        | 0.851        | 1.035        | 1.000        | 0.908        | 0.870        | 1.094         | 1.075         | 1.062         | Q9NQG1       | MANBAL    | Protein MANBAL                                                      |
| 1.111           | 0.980        | 1.045        | 1.108        | 0.938        | 1.033        | 1.068        | 0.868        | 0.875        | 0.759         | 0.735         | 0.797         | P61244       | MAX       | Protein max                                                         |
| 1.030           | 1.020        | 1.095        | 0.988        | 0.869        | 1.118        | 1.297        | 0.909        | 1.204        |               |               |               | Q8IYB1       | MB21D2    | Protein MB21D2                                                      |
| 1.059           | 0.978        | 1.060        | 0.984        | 0.862        | 1.091        | 1.084        | 1.058        | 0.952        | 0.988         | 1.058         | 0.978         | Q9H081       | MIS12     | Protein MIS12 homolog                                               |
| 1.015           | 1.020        | 1.010        | 0.960        | 0.972        | 1.057        | 1.003        | 1.002        | 1.034        | 1.168         | 0.930         | 1.171         | Q9BUK6       | MSTO1     | Protein misato homolog 1                                            |
| 0.998           | 0.967        | 0.902        | 0.879        | 0.941        | 0.978        | 1.024        | 0.974        | 1.182        | 0.874         | 0.801         | 0.892         | Q6ZRQ5       | MMS22L    | Protein MMS22-like                                                  |
| 1.005           | 0.972        | 1.009        | 1.003        | 0.921        | 1.060        | 0.997        | 1.102        | 1.021        | 0.972         | 0.988         | 1.004         | Q7Z3U7       | MON2      | Protein MON2 homolog                                                |
| 0.978           | 0.956        | 1.008        | 0.982        | 0.979        | 1.018        | 0.980        | 0.964        | 0.972        | 1.091         | 1.049         | 1.054         | P39210       | MPV17     | Protein Mpv17                                                       |
| 1.095           | 0.960        | 0.912        | 1.040        | 0.958        | 1.017        | 1.175        | 1.315        | 1.343        | 0.884         | 0.946         | 1.667         | Q8N6N6       | NATD1     | Protein NATD1                                                       |
| 0.983           | 1.062        | 0.984        | 1.022        | 0.989        | 0.956        | 0.969        | 1.049        | 0.925        | 0.881         | 0.977         | 0.902         | Q92597       | NDRG1     | Protein NDRG1                                                       |
| 1.023           | 1.002        | 0.986        | 0.992        | 0.958        | 0.929        | 0.988        | 1.118        | 0.969        | 0.966         | 0.974         | 1.000         | Q9UGV2       | NDRG3     | Protein NDRG3                                                       |
| 0.974           | 1.022        | 1.015        | 1.015        | 0.997        | 1.018        | 1.033        | 1.032        | 1.033        | 1.002         | 0.992         | 1.028         | Q9BZQ8       | FAM129A   | Protein Niban                                                       |
| 1.024           | 1.028        | 0.978        | 0.998        | 1.005        | 0.952        | 0.972        | 1.013        | 0.942        | 0.986         | 1.015         | 0.928         | Q9BPW8       | NIPSNAP1  | Protein NipSnap homolog 1                                           |
| 1.008           | 0.997        | 0.977        | 1.002        | 0.974        | 0.984        | 0.994        | 0.989        | 0.995        | 1.010         | 0.998         | 0.951         | O75323       | GBAS      | Protein NipSnap homolog 2                                           |
| 0.998           | 1.003        | 1.002        | 0.985        | 1.025        | 0.995        | 0.995        | 1.019        | 1.028        | 1.011         | 1.001         | 0.971         | Q9UFN0       | NIPSNAP3A | Protein NipSnap homolog 3A                                          |
| 1.056           | 0.969        | 1.038        | 0.980        | 1.000        | 1.029        | 0.975        | 0.959        | 1.023        | 1.005         | 1.026         | 1.068         | J9JIC5       | C17orf75  | Protein Njmu-R1                                                     |
| 1.012           | 1.002        | 1.031        | 0.993        | 0.962        | 0.976        | 0.942        | 0.989        | 0.980        | 0.947         | 0.960         | 1.033         | Q8IWE2       | FAM114A1  | Protein NOXP20                                                      |
| 1.182           | 1.063        | 1.061        | 1.057        | 1.236        | 0.900        | 0.993        | 1.089        | 1.029        | 1.081         | 0.984         | 0.998         | Q9H7Z3       | NRDE2     | Protein NRDE2 homolog                                               |
| 0.989           | 1.003        | 1.000        | 0.963        | 0.892        | 1.045        | 1.035        | 1.049        | 1.059        | 1.062         | 0.948         | 1.171         | Q96AB6       | NTAN1     | Protein N-terminal asparagine amidohydrolase                        |
|                 |              |              | 0.818        | 0.983        | 1.042        |              |              |              |               |               |               | Q96HA8       | WDYHV1    | Protein N-terminal glutamine amidohydrolase                         |
| 1.013           | 1.007        | 1.012        | 0.982        | 0.983        | 1.015        | 1.048        | 1.035        | 0.997        | 1.075         | 0.988         | 1.077         | P49757       | NUMB      | Protein numb homolog                                                |
| 1.138           | 0.964        | 1.021        | 1.011        | 0.934        | 1.058        | 1.021        | 0.891        | 0.933        | 1.111         | 1.012         | 1.069         | Q5SWX8       | ODR4      | Protein odr-4 homolog                                               |
| 1.012           | 1.009        | 0.993        | 0.988        | 1.045        | 1.027        | 0.998        | 1.000        | 1.059        | 0.999         | 1.010         | 1.047         | O60502       | MGEA5     | Protein O-GlcNAcase                                                 |
| 1.045           | 1.026        | 1.013        | 1.018        | 0.984        | 1.057        | 1.044        | 1.105        | 1.096        | 1.049         | 0.987         | 1.103         | Q8NBL1       | POGLUT1   | Protein O-glucosyltransferase 1                                     |
| 0.990           | 0.969        | 0.992        | 0.997        | 0.931        | 0.980        | 0.967        | 1.082        | 0.963        | 0.970         | 1.016         | 1.001         | Q8WZA1       | POMGNT1   | Protein O-linked-mannose beta-1,2-N-acetylglucosaminyltransferase 1 |
| 1.042           | 1.034        | 0.984        | 1.017        | 0.948        | 1.015        | 1.015        | 1.148        | 0.995        | 0.935         | 0.988         | 1.005         | Q8NAT1       | POMGNT2   | Protein O-linked-mannose beta-1,4-N-acetylglucosaminyltransferase 2 |
| 0.977           | 0.997        | 0.918        | 1.017        | 0.906        | 0.934        | 0.985        | 1.069        | 1.052        | 1.061         | 0.867         | 0.877         | Q9H5K3       | POMK      | Protein O-mannose kinase                                            |
|                 |              |              |              |              |              | 1.171        | 0.766        | 0.889        | 1.379         | 1.018         | 1.196         | Q9Y6A1       | POMT1     | Protein O-mannosyl-transferase 1                                    |
|                 |              |              | 1.023        | 0.911        | 1.032        | 1.089        | 1.049        | 0.923        |               |               |               | Q9UKY4       | POMT2     | Protein O-mannosyl-transferase 2                                    |
| 1.016           | 0.994        | 1.029        | 0.987        | 0.996        | 1.054        | 0.950        | 0.871        | 1.024        | 1.016         | 1.037         | 1.070         | Q13438       | OS9       | Protein OS-9                                                        |
| 1.139           | 1.236        | 1.183        | 0.998        | 0.901        | 0.996        | 1.089        | 1.012        | 1.083        | 0.815         | 1.040         | 0.746         | Q8WVF1       | OSCP1     | Protein OSCP1                                                       |
| 1.027           | 1.034        | 1.057        | 1.024        | 0.982        | 1.031        | 0.996        | 1.105        | 0.997        | 0.992         | 1.024         | 1.013         | Q86TB9       | PATL1     | Protein PAT1 homolog 1                                              |



| Abundance Ratio |              |              |              |              |              |              |              |              |               |               |               | Accession ID | Gene name | Protein Description                                                 |
|-----------------|--------------|--------------|--------------|--------------|--------------|--------------|--------------|--------------|---------------|---------------|---------------|--------------|-----------|---------------------------------------------------------------------|
| 1 d<br>M1/C1    | 1 d<br>M2/C2 | 1 d<br>M3/C3 | 4 d<br>M1/C1 | 4 d<br>M2/C2 | 4 d<br>M3/C3 | 7 d<br>M1/C1 | 7 d<br>M2/C2 | 7 d<br>M3/C3 | 10 d<br>M1/C1 | 10 d<br>M2/C2 | 10 d<br>M3/C3 |              |           |                                                                     |
| 1.015           | 0.973        | 1.015        | 0.994        | 0.979        | 1.056        | 1.037        | 0.960        | 1.033        | 1.028         | 1.004         | 1.081         | Q9BUH6       | C9orf142  | Protein PAXX                                                        |
| 1.014           | 0.987        | 1.018        | 0.970        | 0.952        | 0.999        | 0.982        | 0.971        | 0.997        | 0.998         | 1.011         | 1.031         | Q9BVG4       | PBDC1     | Protein PBDC1                                                       |
| 1.015           | 0.967        | 1.025        | 1.010        | 0.929        | 1.022        | 1.038        | 0.905        | 0.986        | 1.068         | 0.938         | 1.064         | Q9BRX2       | PELO      | Protein pelota homolog                                              |
| 0.962           | 0.946        | 1.018        | 0.904        | 0.943        | 1.145        | 1.012        | 0.973        | 0.991        | 1.012         | 0.947         | 1.056         | PODJ07       | PET100    | Protein PET100 homolog, mitochondrial                               |
|                 |              |              |              |              |              | 0.741        | 0.839        | 1.182        | 0.953         | 0.944         | 0.975         | Q6UWS5       | PET117    | Protein PET117 homolog, mitochondrial                               |
| 0.956           | 1.059        | 1.066        | 0.819        | 1.152        | 0.900        |              |              |              | 1.059         | 0.857         | 1.099         | O60927       | PPP1R11   | Protein phosphatase 1 regulatory subunit 11                         |
| 0.995           | 0.995        | 1.008        | 0.984        | 0.980        | 0.997        | 0.992        | 0.937        | 0.989        | 1.029         | 0.997         | 1.033         | O14974       | PPP1R12A  | Protein phosphatase 1 regulatory subunit 12A                        |
| 0.985           | 0.964        | 1.054        | 0.884        | 0.895        | 0.976        | 1.105        | 0.910        | 0.929        | 1.038         | 1.126         | 1.154         | Q9BZL4       | PPP1R12C  | Protein phosphatase 1 regulatory subunit 12C                        |
| 0.994           | 1.005        | 1.003        | 0.982        | 1.186        | 0.979        | 1.130        | 0.968        | 1.158        | 0.996         | 1.111         | 0.961         | Q96C90       | PPP1R14B  | Protein phosphatase 1 regulatory subunit 14B                        |
| 0.871           | 0.831        | 0.985        | 1.018        | 0.835        | 1.001        | 1.169        | 0.891        | 0.979        | 1.200         | 1.243         | 1.424         | Q96I34       | PPP1R16A  | Protein phosphatase 1 regulatory subunit 16A                        |
| 0.963           | 0.986        | 1.025        | 0.983        | 0.969        | 1.051        | 1.003        | 1.000        | 1.029        | 1.034         | 0.980         | 1.087         | Q6ZMI0       | PPP1R21   | Protein phosphatase 1 regulatory subunit 21                         |
|                 |              |              | 1.120        | 1.087        | 1.062        | 0.850        | 1.013        | 0.909        | 0.944         | 1.005         | 1.010         | O75864       | PPP1R37   | Protein phosphatase 1 regulatory subunit 37                         |
| 0.964           | 1.028        | 1.019        | 0.949        | 0.994        | 0.980        | 0.929        | 0.996        | 1.041        | 1.047         | 1.010         | 1.062         | O95685       | PPP1R3D   | Protein phosphatase 1 regulatory subunit 3D                         |
| 1.041           | 0.989        | 1.007        | 0.994        | 1.033        | 1.007        | 1.008        | 1.061        | 1.028        | 0.993         | 0.969         | 0.992         | Q15435       | PPP1R7    | Protein phosphatase 1 regulatory subunit 7                          |
| 0.973           | 0.969        | 0.960        | 1.012        | 0.990        | 0.967        | 1.052        | 1.034        | 0.990        | 1.054         | 1.040         | 1.025         | O75688       | PPM1B     | Protein phosphatase 1B                                              |
| 1.124           | 0.961        | 1.047        | 1.063        | 0.944        | 1.034        | 1.072        | 0.898        | 1.030        | 1.008         | 0.988         | 1.046         | P49593       | PPM1F     | Protein phosphatase 1F                                              |
| 0.988           | 0.985        | 1.007        | 1.005        | 1.031        | 1.007        | 1.034        | 0.981        | 1.010        | 1.040         | 0.976         | 1.077         | O15355       | PPM1G     | Protein phosphatase 1G                                              |
|                 |              |              |              |              |              |              |              |              | 0.717         | 0.993         | 0.907         | Q5SGD2       | PPM1L     | Protein phosphatase 1L                                              |
| 1.015           | 0.955        | 1.022        | 1.023        | 0.965        | 1.026        | 0.980        | 1.021        | 1.003        | 0.996         | 0.933         | 1.035         | P41236       | PPP1R2    | Protein phosphatase inhibitor 2                                     |
| 0.986           | 0.991        | 0.976        | 0.980        | 1.009        | 0.967        | 1.002        | 0.973        | 1.030        | 1.010         | 0.995         | 1.024         | Q9Y570       | PPME1     | Protein phosphatase methylesterase 1                                |
| 1.076           | 0.929        | 1.124        | 1.009        | 1.058        | 0.986        | 1.041        | 0.886        | 1.008        | 1.283         | 1.233         | 1.151         | Q8NI37       | PPTC7     | Protein phosphatase PTC7 homolog                                    |
| 0.957           | 0.923        | 1.127        | 1.063        | 0.936        | 0.976        | 1.051        | 1.009        | 1.068        | 0.956         | 1.020         | 1.016         | Q8WYL5       | SSH1      | Protein phosphatase Slingshot homolog 1                             |
| 1.024           | 1.000        | 0.992        | 0.994        | 0.978        | 0.992        | 1.028        | 1.061        | 0.963        | 1.063         | 0.981         | 1.058         | Q8TE77       | SSH3      | Protein phosphatase Slingshot homolog 3                             |
| 0.946           | 0.968        | 1.010        | 1.021        | 0.873        | 0.833        | 1.053        | 1.076        | 1.062        | 0.991         | 0.986         | 1.136         | Q9BSJ6       | PIMREG    | Protein PIMREG                                                      |
| 1.004           | 1.017        | 1.037        | 1.045        | 1.118        | 1.016        | 1.079        | 0.915        | 1.009        | 1.052         | 0.958         | 1.100         | P29590       | PML       | Protein PML                                                         |
| 1.001           | 1.003        | 1.003        | 0.997        | 0.969        | 0.997        | 1.025        | 0.994        | 0.980        | 1.032         | 1.026         | 1.022         | Q86U86       | PBRM1     | Protein polybromo-1                                                 |
| 1.118           | 1.021        | 1.027        | 0.985        | 0.942        | 1.117        | 0.948        | 1.112        | 1.078        | 0.935         | 1.021         | 1.005         | Q726K3       | PTAR1     | Protein prenyltransferase alpha subunit repeat-containing protein 1 |
| 0.925           | 0.899        | 1.061        | 0.917        | 0.905        | 0.978        | 0.849        | 0.689        | 0.933        | 1.034         | 0.980         | 1.025         | Q96I23       | PYURF     | Protein preY, mitochondrial                                         |
| 0.978           | 1.002        | 1.008        | 0.990        | 1.000        | 1.011        | 0.951        | 1.003        | 1.002        | 0.953         | 0.951         | 0.998         | Q96M27       | PRRC1     | Protein PRRC1                                                       |
| 0.996           | 0.993        | 1.019        | 0.999        | 0.931        | 0.994        | 1.015        | 0.940        | 0.982        | 1.039         | 0.995         | 1.075         | P48634       | PRRC2A    | Protein PRRC2A                                                      |
| 0.977           | 0.989        | 1.023        | 1.044        | 0.988        | 0.996        | 1.021        | 1.057        | 1.064        | 1.094         | 1.136         | 1.112         | Q5JSZ5       | PRRC2B    | Protein PRRC2B                                                      |
| 1.083           | 1.095        | 1.029        | 1.081        | 0.872        | 1.132        | 1.081        | 1.073        | 0.968        | 0.901         | 1.243         | 0.857         | Q3SYG4       | BBS9      | Protein PTHB1                                                       |
| 1.095           | 1.064        | 1.062        | 1.005        | 0.947        | 0.958        | 0.937        | 1.216        | 0.951        | 0.888         | 1.078         | 0.888         | Q96PU8       | QKI       | Protein quaking                                                     |

| Abundance Ratio |              |              |              |              |              |              |              |              |               |               |               | Accession ID | Gene name | Protein Description                 |
|-----------------|--------------|--------------|--------------|--------------|--------------|--------------|--------------|--------------|---------------|---------------|---------------|--------------|-----------|-------------------------------------|
| 1 d<br>M1/C1    | 1 d<br>M2/C2 | 1 d<br>M3/C3 | 4 d<br>M1/C1 | 4 d<br>M2/C2 | 4 d<br>M3/C3 | 7 d<br>M1/C1 | 7 d<br>M2/C2 | 7 d<br>M3/C3 | 10 d<br>M1/C1 | 10 d<br>M2/C2 | 10 d<br>M3/C3 |              |           |                                     |
| 0.963           | 0.987        | 0.975        | 0.978        | 1.030        | 1.000        | 0.928        | 0.904        | 0.997        | 0.973         | 1.006         | 0.992         | Q9P258       | RCC2      | Protein RCC2                        |
| 0.993           | 0.991        | 0.983        | 0.992        | 0.957        | 1.039        | 1.023        | 0.995        | 0.974        | 1.013         | 1.013         | 1.016         | Q13123       | IK        | Protein Red                         |
| 0.942           | 1.038        | 1.045        | 1.077        | 1.019        | 1.090        | 1.057        | 1.193        | 1.186        | 0.940         | 0.942         | 1.151         | O43663       | PRC1      | Protein regulator of cytokinesis 1  |
| 0.976           | 0.966        | 0.938        | 0.986        | 0.884        | 0.985        | 1.026        | 1.071        | 1.066        | 1.026         | 1.005         | 0.881         | O15258       | RER1      | Protein RER1                        |
| 0.950           | 0.986        | 0.999        | 0.999        | 0.910        | 1.075        | 1.022        | 1.148        | 1.030        | 1.092         | 0.990         | 1.009         | Q96AA3       | RFT1      | Protein RFT1 homolog                |
| 1.118           | 1.001        | 1.012        | 1.000        | 0.973        | 1.047        | 0.993        | 1.064        | 1.067        | 0.991         | 0.985         | 1.037         | Q9H871       | RMND5A    | Protein RMD5 homolog A              |
| 1.088           | 0.806        | 1.471        |              |              |              |              |              |              |               |               |               | Q96G75       | RMND5B    | Protein RMD5 homolog B              |
|                 |              |              | 0.990        | 0.976        | 1.064        | 0.882        | 1.335        | 1.043        |               |               |               | Q9GZN7       | ROGDI     | Protein rogdi homolog               |
|                 |              |              |              |              |              | 1.107        | 1.511        | 1.044        |               |               |               | Q96FB5       | RRNAD1    | Protein RRNAD1                      |
| 0.995           | 1.013        | 1.015        | 0.997        | 0.949        | 1.005        | 0.979        | 1.034        | 1.005        | 1.002         | 1.032         | 1.019         | Q14690       | PDCD11    | Protein RRP5 homolog                |
| 0.989           | 0.995        | 1.010        | 0.988        | 1.020        | 1.069        | 0.975        | 0.943        | 0.977        | 1.016         | 1.061         | 1.071         | A0A0A0MQR2   | RTFDC1    | Protein RTF2 homolog                |
| 1.083           | 1.020        | 1.050        | 1.042        | 1.099        | 1.077        | 1.009        | 0.961        | 1.036        | 1.003         | 1.012         | 1.001         | P60903       | S100A10   | Protein S100-A10                    |
| 0.970           | 1.026        | 0.959        | 1.030        | 1.251        | 1.043        | 1.001        | 0.998        | 1.106        | 0.991         | 1.005         | 0.999         | P31949       | S100A11   | Protein S100-A11                    |
| 1.011           | 0.988        | 0.978        | 0.975        | 0.950        | 0.969        | 0.990        | 1.057        | 0.975        | 1.038         | 1.025         | 0.969         | Q99584       | S100A13   | Protein S100-A13                    |
| 1.013           | 1.021        | 1.037        | 0.990        | 1.031        | 1.044        | 0.942        | 1.093        | 1.019        | 1.019         | 1.017         | 1.066         | Q96FQ6       | S100A16   | Protein S100-A16                    |
|                 |              |              |              |              |              | 0.961        | 0.949        | 0.999        |               |               |               | P29034       | S100A2    | Protein S100-A2                     |
| 0.983           | 0.919        | 0.970        | 0.991        | 0.918        | 0.997        | 0.975        | 0.719        | 0.906        | 1.072         | 0.959         | 0.947         | P06703       | S100A6    | Protein S100-A6                     |
|                 |              |              | 1.116        | 0.902        | 1.026        | 2.334        | 1.017        | 0.688        | 0.976         | 0.884         | 0.971         | P31151       | S100A7    | Protein S100-A7                     |
|                 |              |              | 0.963        | 0.980        | 1.102        | 2.767        | 0.963        | 0.940        | 1.056         | 0.976         | 1.078         | P05109       | S100A8    | Protein S100-A8                     |
| 1.081           | 0.963        | 0.858        | 1.084        | 0.931        | 1.388        | 1.349        | 1.073        | 0.900        | 1.041         | 0.922         | 1.031         | P06702       | S100A9    | Protein S100-A9                     |
| 0.996           | 0.948        | 0.994        | 1.039        | 0.864        | 1.089        | 1.045        | 0.998        | 0.999        | 0.977         | 1.049         | 1.034         | Q96ER3       | SAAL1     | Protein SAAL1                       |
| 0.974           | 1.043        | 1.171        | 1.012        | 0.903        | 0.949        | 0.895        | 0.874        | 1.104        | 0.988         | 1.033         | 1.028         | Q9H4B6       | SAV1      | Protein salvador homolog 1          |
| 0.985           | 0.969        | 1.011        | 0.965        | 0.994        | 1.024        | 0.988        | 0.943        | 0.971        | 1.003         | 0.984         | 1.043         | Q99590       | SCAF11    | Protein SCAF11                      |
| 1.043           | 1.009        | 0.997        | 0.973        | 0.963        | 1.011        | 1.030        | 1.086        | 1.014        | 0.981         | 1.008         | 1.024         | A0A0A0MT33   | SCAF8     | Protein SCAF8                       |
| 1.122           | 1.022        | 1.052        | 1.030        | 0.987        | 0.980        | 0.984        | 1.010        | 0.938        | 1.015         | 1.086         | 1.013         | O75880       | SCO1      | Protein SCO1 homolog, mitochondrial |
| 1.020           | 1.002        | 0.971        | 1.273        | 0.920        | 0.997        | 1.110        | 0.957        | 0.995        | 1.197         | 0.957         | 1.065         | O43819       | SCO2      | Protein SCO2 homolog, mitochondrial |
| 0.980           | 1.027        | 1.061        | 0.993        | 0.969        | 1.067        |              |              |              |               |               |               | HOYDF9       | SCRIB     | Protein scribble homolog (Fragment) |
|                 |              |              |              |              |              | 0.840        | 1.056        | 0.922        |               |               |               | A0A0G2JPP5   | SCRIB     | Protein scribble homolog            |
| 0.958           | 0.994        | 1.018        | 0.990        | 0.934        | 1.011        | 1.004        | 1.002        | 1.000        | 1.032         | 1.012         | 1.064         | A0A0G2JNZ2   | SCRIB     | Protein scribble homolog            |
| 1.036           | 1.022        | 1.034        | 1.053        | 0.970        | 1.029        | 1.020        | 1.021        | 1.027        | 0.974         | 1.041         | 1.004         | Q9NVU7       | SDAD1     | Protein SDA1 homolog                |
| 1.000           | 0.984        | 1.026        | 0.991        | 0.944        | 1.017        | 1.004        | 1.006        | 1.007        | 1.005         | 1.005         | 1.031         | Q6IQ49       | SDE2      | Protein SDE2 homolog                |
| 0.997           | 1.037        | 0.967        | 1.003        | 0.942        | 0.981        | 1.007        | 1.015        | 0.957        | 1.100         | 1.013         | 1.027         | Q9UBV2       | SEL1L     | Protein sel-1 homolog 1             |
| 0.953           | 0.834        | 1.049        | 0.980        | 0.877        | 1.016        | 1.002        | 1.089        | 1.022        | 0.966         | 0.944         | 0.985         | Q96JX3       | SERAC1    | Protein SERAC1                      |
| 1.025           | 0.993        | 0.982        | 1.008        | 0.986        | 0.994        | 1.011        | 1.048        | 1.001        | 1.042         | 1.030         | 0.988         | Q01105       | SET       | Protein SET                         |

| Abundance Ratio |              |              |              |              |              |              |              |              |               |               |               | Accession ID | Gene name | Protein Description                |
|-----------------|--------------|--------------|--------------|--------------|--------------|--------------|--------------|--------------|---------------|---------------|---------------|--------------|-----------|------------------------------------|
| 1 d<br>M1/C1    | 1 d<br>M2/C2 | 1 d<br>M3/C3 | 4 d<br>M1/C1 | 4 d<br>M2/C2 | 4 d<br>M3/C3 | 7 d<br>M1/C1 | 7 d<br>M2/C2 | 7 d<br>M3/C3 | 10 d<br>M1/C1 | 10 d<br>M2/C2 | 10 d<br>M3/C3 |              |           |                                    |
| 1.031           | 1.010        | 0.995        | 1.017        | 0.982        | 0.971        | 0.991        | 1.016        | 1.035        | 0.991         | 1.011         | 0.993         | Q9Y2Z0       | SUGT1     | Protein SGT1 homolog               |
|                 |              |              | 0.752        | 0.798        | 1.212        | 1.218        | 0.818        | 0.954        |               |               |               | Q6UWI4       | SHISA2    | Protein shisa-2 homolog            |
| 1.284           | 1.262        | 1.062        | 0.934        | 0.945        | 0.966        | 0.943        | 0.908        | 0.990        | 1.096         | 1.011         | 1.144         | Q2M3G4       | SHROOM1   | Protein Shroom1                    |
| 1.166           | 1.095        | 1.065        |              |              |              | 1.149        | 0.994        | 0.971        | 0.999         | 0.988         | 1.041         | Q8TF72       | SHROOM3   | Protein Shroom3                    |
|                 |              |              | 1.138        | 1.001        | 1.002        |              |              |              |               |               |               | A0A087WTQ6   | SDK1      | Protein sidekick-1                 |
| 1.025           | 0.926        | 1.001        |              |              |              | 0.864        | 1.044        | 0.994        | 1.040         | 1.144         | 1.184         | Q9NX38       | FAM206A   | Protein Simiate                    |
| 1.029           | 1.029        | 1.085        | 0.996        | 0.926        | 0.967        | 0.989        | 1.074        | 1.010        | 1.104         | 1.015         | 1.082         | Q9UPU9       | SAMD4A    | Protein Smaug homolog 1            |
| 1.038           | 1.047        | 1.005        | 0.987        | 1.028        | 1.043        | 1.002        | 1.127        | 1.078        | 0.970         | 0.991         | 1.027         | Q5PRF9       | SAMD4B    | Protein Smaug homolog 2            |
| 0.904           | 0.946        | 1.032        | 0.954        | 0.952        | 1.040        | 0.964        | 1.023        | 1.048        | 0.964         | 0.994         | 1.007         | Q9UPR3       | SMG5      | Protein SMG5                       |
| 1.150           | 1.008        | 1.008        | 0.977        | 0.976        | 0.954        | 0.981        | 1.085        | 0.941        | 1.032         | 1.072         | 1.017         | Q9H0W8       | SMG9      | Protein SMG9                       |
| 0.978           | 0.944        | 1.040        | 0.894        | 0.829        | 0.742        | 1.052        | 1.004        | 0.989        | 1.071         | 1.018         | 1.062         | Q5TF21       | SOGA3     | Protein SOGA3                      |
| 0.982           | 0.950        | 0.969        | 1.091        | 0.829        | 1.035        | 1.045        | 0.956        | 1.034        | 1.106         | 1.028         | 1.053         | H3BMF4       | SPNS1     | Protein spinster homolog 1         |
|                 |              |              | 0.976        | 0.934        | 0.932        |              |              |              | 1.078         | 1.067         | 1.393         | O43597       | SPRY2     | Protein sprouty homolog 2          |
| 1.002           | 1.015        | 1.073        | 0.941        | 0.891        | 0.985        | 1.049        | 1.016        | 1.073        | 1.041         | 1.020         | 1.066         | A0A0C4DFS6   | SPRY4     | Protein sprouty homolog 4          |
| 1.002           | 1.043        | 1.021        | 1.055        | 0.980        | 1.022        | 1.028        | 1.066        | 0.961        | 1.064         | 1.026         | 1.157         | Q68D10       | SPTY2D1   | Protein SPT2 homolog               |
| 1.007           | 0.971        | 0.965        | 0.968        | 0.946        | 0.958        | 1.028        | 1.041        | 1.043        | 1.169         | 1.009         | 1.106         | Q15532       | SS18      | Protein SSXT                       |
| 1.011           | 0.997        | 1.047        | 0.990        | 0.977        | 1.021        | 0.973        | 1.027        | 1.012        | 0.988         | 1.019         | 1.046         | A3KN83       | SBNO1     | Protein strawberry notch homolog 1 |
| 1.053           | 1.158        | 1.054        | 0.973        | 1.107        | 1.187        | 1.077        | 1.181        | 0.770        | 1.353         | 1.118         | 1.142         | Q9Y2G9       | SBNO2     | Protein strawberry notch homolog 2 |
| 1.008           | 1.052        | 0.995        | 0.983        | 0.891        | 0.977        | 1.119        | 1.166        | 1.009        | 1.149         | 1.055         | 1.062         | Q8N2H4       | SYS1      | Protein SYS1 homolog               |
| 1.066           | 1.077        | 1.156        | 1.010        | 0.961        | 1.009        | 1.020        | 1.073        | 0.952        | 0.971         | 0.971         | 1.079         | Q5T011       | SZT2      | Protein SZT2                       |
| 0.950           | 1.047        | 1.051        | 0.940        | 1.003        | 1.019        | 1.010        | 1.000        | 1.017        | 0.995         | 0.987         | 1.088         | Q9C0D5       | TANC1     | Protein TANC1                      |
| 1.036           | 1.025        | 1.065        | 0.981        | 0.957        | 0.995        | 1.015        | 1.049        | 1.028        | 1.040         | 0.986         | 1.037         | Q9UK61       | FAM208A   | Protein TASOR                      |
| 0.997           | 0.985        | 1.014        | 1.008        | 0.970        | 0.989        | 0.999        | 1.027        | 1.002        | 1.013         | 0.991         | 0.983         | Q969Z0       | TBRG4     | Protein TBRG4                      |
| 1.024           | 0.997        | 1.002        | 0.971        | 0.947        | 0.944        | 0.904        | 0.925        | 0.966        | 0.929         | 1.023         | 1.007         | Q92734       | TFG       | Protein TFG                        |
| 0.895           | 0.917        | 1.035        | 0.912        | 0.909        | 1.210        | 1.031        | 0.998        | 0.969        | 1.146         | 0.999         | 1.077         | Q8WUY1       | THEM6     | Protein THEM6                      |
| 1.037           | 1.075        | 1.097        | 0.982        | 0.930        | 1.020        | 0.933        | 1.116        | 1.010        | 0.975         | 0.981         | 0.985         | Q5TEJ8       | THEMIS2   | Protein THEMIS2                    |
| 0.948           | 0.960        | 1.018        | 1.051        | 0.870        | 0.842        | 1.151        | 1.201        | 0.946        | 0.850         | 0.858         | 0.979         | Q9UNS1       | TIMELESS  | Protein timeless homolog           |
| 1.125           | 1.072        | 1.045        | 1.037        | 0.989        | 1.086        | 1.048        | 1.072        | 1.073        | 1.106         | 1.008         | 1.078         | Q6PL24       | TMED8     | Protein TMED8                      |
|                 |              |              |              |              |              | 0.700        | 1.228        | 0.877        |               |               |               | F1T0I1       | SEC16A    | Protein transport protein Sec16A   |
| 0.965           | 1.004        | 0.997        | 1.006        | 0.958        | 1.002        | 1.000        | 1.029        | 0.988        | 1.030         | 0.973         | 1.041         | J3KNL6       | SEC16A    | Protein transport protein Sec16A   |
| 0.978           | 1.001        | 0.982        | 0.981        | 1.037        | 1.012        | 0.975        | 0.965        | 1.011        | 0.984         | 0.983         | 0.986         | Q15436       | SEC23A    | Protein transport protein Sec23A   |
| 0.976           | 0.982        | 1.038        | 1.020        | 0.957        | 1.062        | 1.017        | 1.074        | 1.000        | 0.966         | 0.987         | 1.004         | Q15437       | SEC23B    | Protein transport protein Sec23B   |
| 1.019           | 1.006        | 1.016        | 1.009        | 0.992        | 1.053        | 0.994        | 1.126        | 1.040        | 1.001         | 1.025         | 1.002         | O95486       | SEC24A    | Protein transport protein Sec24A   |
| 1.023           | 1.036        | 1.034        | 1.015        | 1.014        | 1.051        | 0.985        | 1.058        | 1.029        | 0.966         | 1.011         | 0.983         | P53992       | SEC24C    | Protein transport protein Sec24C   |

| Abundance Ratio |              |              |              |              |              |              |              |              |               |               |               | Accession ID | Gene name | Protein Description                                     |
|-----------------|--------------|--------------|--------------|--------------|--------------|--------------|--------------|--------------|---------------|---------------|---------------|--------------|-----------|---------------------------------------------------------|
| 1 d<br>M1/C1    | 1 d<br>M2/C2 | 1 d<br>M3/C3 | 4 d<br>M1/C1 | 4 d<br>M2/C2 | 4 d<br>M3/C3 | 7 d<br>M1/C1 | 7 d<br>M2/C2 | 7 d<br>M3/C3 | 10 d<br>M1/C1 | 10 d<br>M2/C2 | 10 d<br>M3/C3 |              |           |                                                         |
|                 |              |              | 1.013        | 1.025        | 0.950        | 1.048        | 0.962        | 1.002        |               |               |               | HOYAB3       | SEC31A    | Protein transport protein Sec31A (Fragment)             |
| 1.011           | 1.017        | 1.006        | 0.997        | 0.990        | 0.970        | 0.989        | 1.020        | 0.984        | 0.975         | 0.993         | 0.960         | D6REX3       | SEC31A    | Protein transport protein Sec31A                        |
| 0.940           | 0.997        | 0.932        | 0.944        | 0.848        | 1.042        | 1.067        | 1.019        | 0.957        | 1.199         | 1.033         | 0.942         | B4DR61       | SEC61A1   | Protein transport protein Sec61 subunit alpha isoform 1 |
|                 |              |              |              |              |              |              |              |              | 1.373         | 0.811         | 0.806         | Q9H9S3       | SEC61A2   | Protein transport protein Sec61 subunit alpha isoform 2 |
| 0.900           | 0.986        | 0.979        | 0.960        | 0.938        | 1.052        | 0.990        | 0.954        | 0.960        | 1.015         | 1.012         | 0.965         | P60468       | SEC61B    | Protein transport protein Sec61 subunit beta            |
| 1.213           | 0.818        | 1.171        | 0.917        | 0.862        | 0.944        | 0.856        | 1.322        | 0.977        | 0.885         | 0.931         | 1.014         | P60059       | SEC61G    | Protein transport protein Sec61 subunit gamma           |
| 0.929           | 1.044        | 0.985        | 0.991        | 0.997        | 1.020        | 1.019        | 0.970        | 0.996        | 0.960         | 0.996         | 0.990         | Q9Y5U2       | TSSC4     | Protein TSSC4                                           |
| 1.019           | 1.002        | 1.063        | 1.034        | 0.992        | 0.995        | 1.036        | 1.068        | 0.983        | 0.998         | 1.000         | 1.043         | Q93096       | PTP4A1    | Protein tyrosine phosphatase type IVA 1                 |
|                 |              |              | 1.139        | 1.831        | 0.997        | 1.168        | 0.744        | 1.068        | 1.053         | 1.011         | 1.050         | Q12974       | PTP4A2    | Protein tyrosine phosphatase type IVA 2                 |
| 0.931           | 0.905        | 1.030        | 0.903        | 0.885        | 1.139        |              |              |              | 1.062         | 0.996         | 1.105         | Q13432       | UNC119    | Protein unc-119 homolog A                               |
| 1.037           | 1.045        | 1.015        | 1.018        | 0.962        | 0.980        | 0.979        | 0.998        | 0.998        | 0.970         | 1.040         | 0.995         | A6NIH7       | UNC119B   | Protein unc-119 homolog B                               |
| 1.037           | 1.025        | 1.041        | 0.978        | 0.970        | 1.013        | 0.967        | 0.994        | 1.055        | 1.016         | 0.989         | 1.022         | A0A1B0GUS7   | UNC13B    | Protein unc-13 homolog B                                |
| 0.982           | 1.016        | 1.019        | 0.969        | 0.992        | 1.043        | 0.994        | 1.025        | 1.027        | 1.007         | 1.007         | 1.046         | Q9H3U1       | UNC45A    | Protein unc-45 homolog A                                |
| 0.952           | 0.954        | 0.943        | 0.935        | 0.823        | 0.974        | 1.036        | 1.085        | 0.997        | 1.118         | 1.025         | 1.045         | Q9H1C4       | UNC93B1   | Protein unc-93 homolog B1                               |
| 1.002           | 0.953        | 0.997        | 0.979        | 0.943        | 1.044        | 1.030        | 1.005        | 0.983        | 0.991         | 1.007         | 1.034         | A0A0C4DFR8   | UXT       | Protein UXT                                             |
| 1.030           | 1.022        | 1.018        | 1.033        | 0.960        | 1.047        | 1.026        | 1.045        | 1.029        | 0.999         | 1.029         | 0.973         | Q08AM6       | VAC14     | Protein VAC14 homolog                                   |
| 1.029           | 1.014        | 1.059        | 0.978        | 0.957        | 1.020        | 0.994        | 1.064        | 1.053        | 1.028         | 0.988         | 1.032         | Q69YN4       | KIAA1429  | Protein virilizer homolog                               |
| 1.030           | 0.996        | 1.032        | 1.025        | 0.989        | 0.977        | 1.000        | 1.034        | 0.951        | 1.015         | 1.024         | 1.019         | M0QXA7       | WIZ       | Protein Wiz                                             |
|                 |              |              |              |              |              |              |              |              | 1.224         | 0.999         | 0.991         | Q9H1J7       | WNT5B     | Protein Wnt-5b                                          |
| 0.947           | 1.004        | 0.979        | 0.996        | 0.933        | 1.012        | 0.999        | 0.984        | 0.980        | 1.017         | 1.029         | 1.087         | O75695       | RP2       | Protein XRP2                                            |
| 0.956           | 1.057        | 0.929        | 0.949        | 0.942        | 1.012        | 0.943        | 1.079        | 0.979        | 0.975         | 1.022         | 0.907         | O95070       | YIF1A     | Protein YIF1A                                           |
| 0.950           | 1.250        | 1.016        | 0.825        | 0.830        | 1.082        | 1.036        | 1.058        | 1.005        |               |               |               | Q5BJH7       | YIF1B     | Protein YIF1B                                           |
| 0.984           | 0.980        | 0.996        | 1.006        | 0.950        | 0.930        | 1.159        | 1.095        | 1.043        | 1.031         | 1.094         | 0.943         | Q9Y548       | YIPF1     | Protein YIPF1                                           |
| 0.867           | 0.976        | 0.979        | 1.000        | 0.868        | 1.023        | 1.031        | 1.024        | 1.000        | 1.014         | 1.022         | 1.113         | E7EQR8       | YIPF3     | Protein YIPF3                                           |
| 0.964           | 0.969        | 1.020        | 0.919        | 0.936        | 1.035        | 1.042        | 1.074        | 0.907        | 0.951         | 0.982         | 1.001         | Q9BSR8       | YIPF4     | Protein YIPF4                                           |
| 0.949           | 0.995        | 1.031        | 1.042        | 0.951        | 1.045        | 1.071        | 1.007        | 1.016        | 1.075         | 0.965         | 1.151         | Q96EC8       | YIPF6     | Protein YIPF6                                           |
| 1.049           | 0.988        | 1.002        | 1.087        | 0.924        | 1.025        | 1.044        | 1.010        | 1.101        | 1.044         | 0.983         | 1.032         | P62699       | YPEL5     | Protein yippee-like 5                                   |
| 0.830           | 0.970        | 0.894        | 0.913        | 1.005        | 1.208        | 0.822        | 0.961        | 1.008        | 0.629         | 0.875         | 1.049         | Q7Z7L7       | ZER1      | Protein zer-1 homolog                                   |
| 1.039           | 0.994        | 1.015        | 0.978        | 0.925        | 1.014        | 1.029        | 1.043        | 0.990        | 0.927         | 0.954         | 1.037         | Q9H900       | ZWILCH    | Protein zwilch homolog                                  |
| 0.988           | 0.933        | 1.078        | 0.872        | 0.893        | 1.044        | 0.960        | 1.128        | 1.074        | 0.923         | 0.969         | 1.071         | Q9C0D3       | ZYG11B    | Protein zyg-11 homolog B                                |
|                 |              |              | 0.996        | 1.250        | 0.849        |              |              |              |               |               |               | Q9ULC6       | PADI1     | Protein-arginine deiminase type-1                       |
| 0.955           | 0.991        | 0.956        | 1.022        | 1.080        | 1.030        | 1.051        | 1.067        | 1.069        | 1.043         | 1.104         | 1.005         | Q9Y2J8       | PADI2     | Protein-arginine deiminase type-2                       |

| Abundance Ratio |              |              |              |              |              |              |              |              |               |               |               | Accession ID | Gene name    | Protein Description                                                    |
|-----------------|--------------|--------------|--------------|--------------|--------------|--------------|--------------|--------------|---------------|---------------|---------------|--------------|--------------|------------------------------------------------------------------------|
| 1 d<br>M1/C1    | 1 d<br>M2/C2 | 1 d<br>M3/C3 | 4 d<br>M1/C1 | 4 d<br>M2/C2 | 4 d<br>M3/C3 | 7 d<br>M1/C1 | 7 d<br>M2/C2 | 7 d<br>M3/C3 | 10 d<br>M1/C1 | 10 d<br>M2/C2 | 10 d<br>M3/C3 |              |              |                                                                        |
| 1.167           | 1.213        | 1.063        | 1.349        | 0.971        | 0.777        | 1.302        | 1.116        | 0.902        | 1.267         | 1.128         | 1.423         | Q8IZE3       | SCYL3        | Protein-associating with the carboxyl-terminal domain of ezrin         |
| 1.026           | 1.027        | 1.074        | 1.008        | 0.932        | 1.021        | 1.002        | 1.178        | 0.999        | 1.006         | 1.035         | 1.006         | E7EMA9       | PGGHG        | Protein-glucosylgalactosylhydroxylysine glucosidase                    |
| 1.004           | 0.989        | 0.975        | 1.000        | 0.991        | 1.024        | 0.980        | 1.035        | 1.008        | 1.007         | 0.970         | 1.024         | Q9H993       | ARMT1        | Protein-glutamate O-methyltransferase                                  |
| 1.035           | 1.019        | 0.986        | 0.993        | 1.111        | 0.979        | 0.990        | 0.950        | 1.003        | 0.967         | 0.983         | 0.977         | P21980       | TGM2         | Protein-glutamine gamma-glutamyltransferase 2                          |
|                 |              |              |              |              |              |              |              |              | 0.941         | 1.089         | 1.168         | Q96MG8       | PCMTD1       | Protein-L-isoaspartate O-methyltransferase domain-containing protein 1 |
| 1.107           | 1.002        | 1.072        | 0.934        | 0.922        | 1.200        | 1.033        | 1.024        | 1.003        |               |               |               | Q9NV79       | PCMTD2       | Protein-L-isoaspartate O-methyltransferase domain-containing protein 2 |
| 0.992           | 0.979        | 0.997        | 0.976        | 0.990        | 0.969        | 0.998        | 0.949        | 0.978        | 0.984         | 0.985         | 0.998         | H7BY58       | PCMT1        | Protein-L-isoaspartate O-methyltransferase                             |
| 1.118           | 1.094        | 0.971        | 1.095        | 0.829        | 0.965        | 1.176        | 1.118        | 1.183        | 0.944         | 1.046         | 1.056         | O60725       | ICMT         | Protein-S-isoprenylcysteine O-methyltransferase                        |
|                 |              |              | 1.110        | 0.754        | 1.070        | 0.883        | 1.094        | 1.047        |               |               |               | O60704       | TPST2        | Protein-tyrosine sulfotransferase 2                                    |
| 0.987           | 1.385        | 1.375        |              |              |              | 0.881        | 1.148        | 0.994        |               |               |               | Q92954       | PRG4         | Proteoglycan 4                                                         |
| 0.972           | 0.881        | 1.051        | 1.592        | 1.406        | 1.103        | 1.064        | 0.853        | 0.858        | 1.122         | 1.015         | 1.045         | Q04941       | PLP2         | Proteolipid protein 2                                                  |
| 1.109           | 1.037        | 0.946        | 0.971        | 0.922        | 1.056        | 1.037        | 0.921        | 0.954        | 1.188         | 1.165         | 1.167         | H7C2N1       | PTMA         | Prothymosin alpha (Fragment)                                           |
| 1.060           | 0.991        | 1.072        | 0.985        | 0.929        | 1.047        | 1.025        | 1.130        | 0.863        | 0.997         | 1.062         | 1.160         | A0A087WVP1   | FAT1         | Protocadherin Fat 1                                                    |
| 0.969           | 0.562        | 0.980        | 1.051        | 0.701        | 0.943        |              |              |              |               |               |               | Q6V0I7       | FAT4         | Protocadherin Fat 4                                                    |
|                 |              |              |              |              |              |              |              |              | 1.146         | 1.068         | 1.105         | Q9UN70       | PCDHGC3      | Protocadherin gamma-C3                                                 |
| 1.049           | 0.947        | 1.077        |              |              |              |              |              |              |               |               |               | Q8TAB3       | PCDH19       | Protocadherin-19                                                       |
| 1.121           | 0.908        | 0.974        | 0.931        | 0.970        | 1.024        | 1.025        | 1.000        | 0.784        | 1.131         | 0.892         | 0.935         | A0A096LNH0   | DCHS2        | Protocadherin-23 (Fragment)                                            |
|                 |              |              | 0.833        | 0.703        | 1.166        | 0.777        | 0.912        | 1.215        | 1.002         | 1.215         | 1.075         | Q96QE2       | SLC2A13      | Proton myo-inositol cotransporter                                      |
|                 |              |              | 1.108        | 0.875        | 1.257        | 0.948        | 1.107        | 1.223        | 1.281         | 1.238         | 1.306         | Q7Z2H8       | SLC36A1      | Proton-coupled amino acid transporter 1                                |
| 0.990           | 1.059        | 1.063        | 1.073        | 0.900        | 1.051        | 1.062        | 1.074        | 1.115        | 1.023         | 0.957         | 1.161         | Q6YBV0       | SLC36A4      | Proton-coupled amino acid transporter 4                                |
| 1.043           | 0.992        | 1.016        | 0.961        | 0.996        | 0.989        | 1.010        | 1.109        | 0.991        | 0.997         | 1.026         | 1.026         | Q04864       | REL          | Proto-oncogene c-Rel                                                   |
| 1.043           | 1.057        | 1.011        | 1.002        | 0.988        | 1.023        | 0.980        | 0.971        | 1.025        | 1.031         | 0.981         | 1.045         | P50336       | PPOX         | Protoporphyrinogen oxidase                                             |
| 0.973           | 1.023        | 1.091        | 0.997        | 0.916        | 1.129        | 1.121        | 1.153        | 1.060        | 0.853         | 0.942         | 0.856         | F8VU11       | PRPF40B      | PRP40 pre-mRNA processing factor 40 homolog B (Yeast), isoform CRA_a   |
| 1.148           | 0.674        | 0.865        | 0.806        | 0.917        | 1.099        | 0.956        | 1.002        | 1.007        | 0.869         | 0.933         | 1.126         | B1AHC4       | PRR5-ARHGAP8 | PRR5-ARHGAP8 readthrough                                               |
| 1.040           | 1.014        | 0.998        | 1.009        | 0.997        | 0.943        | 0.994        | 1.068        | 0.959        | 0.962         | 0.798         | 1.029         | Q9H792       | PEAK1        | Pseudopodium-enriched atypical kinase 1                                |
| 1.016           | 1.010        | 0.949        | 0.995        | 0.959        | 0.979        | 0.997        | 1.109        | 1.005        | 0.982         | 0.974         | 0.997         | Q96PZ0       | PUS7         | Pseudouridylate synthase 7 homolog                                     |
| 0.987           | 1.054        | 1.023        | 0.950        | 0.907        | 0.999        | 0.986        | 1.224        | 1.067        | 0.970         | 0.967         | 0.977         | Q9H0K6       | PUS7L        | Pseudouridylate synthase 7 homolog-like protein                        |
| 1.026           | 0.951        | 1.051        | 1.008        | 1.038        | 1.013        | 1.037        | 0.991        | 0.946        | 1.016         | 0.987         | 1.009         | Q9UBP9       | GULP1        | PTB domain-containing engulfment adapter protein 1                     |
| 1.073           | 1.015        | 1.070        | 0.939        | 0.961        | 0.989        | 1.116        | 1.065        | 1.026        | 1.037         | 0.937         | 1.039         | Q9H0N5       | PCBD2        | Pterin-4-alpha-carbinolamine dehydratase 2                             |
| 1.011           | 0.998        | 0.971        | 0.988        | 0.930        | 0.973        | 1.017        | 1.050        | 0.985        | 1.060         | 0.990         | 1.000         | P61457       | PCBD1        | Pterin-4-alpha-carbinolamine dehydratase                               |

| Abundance Ratio |              |              |              |              |              |              |              |              |               |               |               | Accession ID | Gene name | Protein Description                                                                |
|-----------------|--------------|--------------|--------------|--------------|--------------|--------------|--------------|--------------|---------------|---------------|---------------|--------------|-----------|------------------------------------------------------------------------------------|
| 1 d<br>M1/C1    | 1 d<br>M2/C2 | 1 d<br>M3/C3 | 4 d<br>M1/C1 | 4 d<br>M2/C2 | 4 d<br>M3/C3 | 7 d<br>M1/C1 | 7 d<br>M2/C2 | 7 d<br>M3/C3 | 10 d<br>M1/C1 | 10 d<br>M2/C2 | 10 d<br>M3/C3 |              |           |                                                                                    |
| 1.007           | 1.008        | 1.000        | 0.982        | 0.994        | 0.989        | 0.996        | 0.982        | 0.991        | 1.007         | 1.007         | 1.011         | Q5T1Z8       | PUM1      | Pumilio homolog 1                                                                  |
|                 |              |              | 1.063        | 0.912        | 1.081        | 1.002        | 0.941        | 1.091        | 0.904         | 0.981         | 1.137         | Q14671       | PUM1      | Pumilio homolog 1                                                                  |
| 0.983           | 1.020        | 1.035        | 0.997        | 0.999        | 1.046        | 1.022        | 1.077        | 1.056        | 1.001         | 1.033         | 1.035         | Q15397       | PUM3      | Pumilio homolog 3                                                                  |
| 0.952           | 1.007        | 1.002        | 0.997        | 1.029        | 0.998        | 0.991        | 1.041        | 0.999        | 0.989         | 0.977         | 0.999         | P00491       | PNP       | Purine nucleoside phosphorylase                                                    |
| 0.976           | 1.010        | 0.981        | 0.988        | 0.986        | 0.990        | 0.983        | 1.023        | 0.994        | 0.970         | 0.961         | 0.980         | P55786       | NPEPPS    | Puromycin-sensitive aminopeptidase                                                 |
| 0.852           | 0.949        | 1.412        | 0.772        | 0.942        | 1.339        |              |              |              |               |               |               | A6NEC2       | NPEPPSL1  | Puromycin-sensitive aminopeptidase-like protein                                    |
| 1.038           | 0.990        | 1.008        | 0.981        | 0.836        | 0.870        | 1.110        | 1.061        | 0.944        | 0.893         | 0.772         | 1.155         | Q96GX2       | ATXN7L3B  | Putative ataxin-7-like protein 3B                                                  |
| 1.052           | 1.067        | 1.119        | 0.982        | 1.081        | 0.975        | 0.966        | 1.333        | 1.149        |               |               |               | Q92771       | DDX12P    | Putative ATP-dependent RNA helicase DDX12                                          |
| 0.962           | 0.928        | 0.943        | 1.069        | 0.937        | 1.020        | 1.097        | 1.088        | 0.924        | 1.018         | 1.045         | 1.030         | Q9H6R0       | DHX33     | Putative ATP-dependent RNA helicase DHX33                                          |
| 1.021           | 1.003        | 1.027        | 0.950        | 0.940        | 1.027        | 0.971        | 1.060        | 1.076        | 0.992         | 0.985         | 1.040         | Q6P158       | DHX57     | Putative ATP-dependent RNA helicase DHX57                                          |
|                 |              |              |              |              |              |              |              |              | 0.884         | 1.086         | 1.046         | Q9NP73       | ALG13     | Putative bifunctional UDP-N-acetylglucosamine transferase and deubiquitinase ALG13 |
| 1.010           | 1.001        | 0.996        | 1.023        | 1.027        | 1.026        | 1.016        | 0.995        | 0.981        | 0.988         | 0.994         | 0.987         | Q6P1N9       | TATDN1    | Putative deoxyribonuclease TATDN1                                                  |
| 1.070           | 1.028        | 1.066        | 1.066        | 0.996        | 0.919        |              |              |              |               |               |               | Q93075       | TATDN2    | Putative deoxyribonuclease TATDN2                                                  |
| 0.953           | 0.974        | 1.018        | 1.028        | 0.981        | 1.039        | 0.978        | 0.961        | 1.004        | 0.952         | 0.929         | 1.127         | Q8N806       | UBR7      | Putative E3 ubiquitin-protein ligase UBR7                                          |
| 1.233           | 1.006        | 1.043        | 1.026        | 0.845        | 0.807        |              |              |              |               |               |               | E9PDK2       | UNKL      | Putative E3 ubiquitin-protein ligase UNKL                                          |
| 0.979           | 0.980        | 0.999        | 0.970        | 0.982        | 0.944        | 0.857        | 0.838        | 0.953        | 0.917         | 1.031         | 0.886         | Q5VTE0       | EEF1A1P5  | Putative elongation factor 1-alpha-like 3                                          |
| 1.051           | 1.036        | 1.012        | 0.983        | 1.116        | 1.055        | 0.947        | 1.028        | 1.003        | 1.034         | 0.934         | 1.027         | Q8WUX2       | CHAC2     | Putative glutathione-specific gamma-glutamylcyclotransferase 2                     |
| 1.076           | 0.973        | 1.025        | 1.103        | 0.929        | 1.052        | 1.106        | 0.969        | 1.054        | 1.166         | 1.025         | 1.052         | H0Y2S1       | GTPBP6    | Putative GTP-binding protein 6                                                     |
| 0.824           | 0.986        | 0.876        | 0.966        | 0.881        | 1.071        | 0.975        | 1.124        | 0.906        | 1.085         | 1.016         | 1.010         | Q58FG1       | HSP90AA4P | Putative heat shock protein HSP 90-alpha A4                                        |
|                 |              |              | 0.974        | 0.880        | 1.220        |              |              |              | 1.135         | 1.046         | 1.266         | Q58FF8       | HSP90AB2P | Putative heat shock protein HSP 90-beta 2                                          |
| 1.014           | 0.987        | 0.923        |              |              |              | 1.077        | 0.989        | 1.010        | 0.997         | 0.645         | 1.082         | Q58FF7       | HSP90AB3P | Putative heat shock protein HSP 90-beta-3                                          |
| 0.995           | 1.029        | 0.995        | 1.005        | 0.958        | 0.948        | 0.990        | 1.089        | 1.007        | 0.974         | 0.993         | 1.024         | Q9HCE1       | MOV10     | Putative helicase MOV-10                                                           |
| 1.086           | 1.008        | 1.224        | 0.993        | 1.032        | 0.958        | 1.055        | 1.010        | 1.011        | 1.013         | 0.931         | 1.142         | Q2TB90       | HKDC1     | Putative hexokinase HKDC1                                                          |
| 1.105           | 1.048        | 0.985        | 1.078        | 1.105        | 0.913        | 1.024        | 1.022        | 0.974        | 1.026         | 1.038         | 0.976         | O75884       | RBBP9     | Putative hydrolase RBBP9                                                           |
| 0.963           | 1.035        | 1.051        | 0.972        | 0.952        | 1.026        | 1.033        | 1.122        | 1.059        | 0.995         | 0.973         | 1.112         | Q5T013       | HYI       | Putative hydroxypyruvate isomerase                                                 |
| 1.024           | 1.020        | 1.015        | 1.004        | 0.978        | 1.046        | 1.022        | 1.068        | 1.080        | 0.987         | 1.028         | 1.009         | Q5T280       | SPOUT1    | Putative methyltransferase C9orf114                                                |
| 1.013           | 1.033        | 1.064        |              |              |              |              |              |              |               |               |               | Q8TEA1       | NSUN6     | Putative methyltransferase NSUN6                                                   |
| 1.089           | 1.087        | 0.986        | 1.029        | 0.953        | 1.021        | 1.013        | 0.983        | 1.026        | 1.018         | 1.017         | 0.997         | Q96A73       | KIAA1191  | Putative monooxygenase p33MONOX                                                    |
|                 |              |              | 0.968        | 0.858        | 0.903        | 1.023        | 1.230        | 0.849        | 1.108         | 1.033         | 1.078         | Q9BZK3       | NACAP1    | Putative nascent polypeptide-associated complex subunit alpha-like protein         |
| 0.968           | 1.001        | 0.955        | 1.013        | 0.880        | 1.055        | 1.119        | 1.119        | 1.010        | 1.201         | 1.061         | 1.196         | O60361       | NME2P1    | Putative nucleoside diphosphate kinase                                             |
| 1.004           | 0.970        | 0.988        | 0.981        | 1.016        | 0.999        | 1.014        | 0.963        | 0.989        | 1.056         | 1.000         | 1.001         | Q6GMV3       | PTRHD1    | Putative peptidyl-tRNA hydrolase PTRHD1                                            |
| 1.012           | 1.007        | 0.985        | 1.032        | 1.037        | 1.041        | 1.073        | 1.020        | 1.057        | 1.138         | 1.085         | 1.109         | Q8NHP8       | PLBD2     | Putative phospholipase B-like 2                                                    |

| Abundance Ratio |              |              |              |              |              |              |              |              |               |               |               | Accession ID | Gene name     | Protein Description                                                |
|-----------------|--------------|--------------|--------------|--------------|--------------|--------------|--------------|--------------|---------------|---------------|---------------|--------------|---------------|--------------------------------------------------------------------|
| 1 d<br>M1/C1    | 1 d<br>M2/C2 | 1 d<br>M3/C3 | 4 d<br>M1/C1 | 4 d<br>M2/C2 | 4 d<br>M3/C3 | 7 d<br>M1/C1 | 7 d<br>M2/C2 | 7 d<br>M3/C3 | 10 d<br>M1/C1 | 10 d<br>M2/C2 | 10 d<br>M3/C3 |              |               |                                                                    |
| 1.001           | 1.036        | 0.978        | 0.925        | 1.028        | 1.053        | 0.996        | 1.061        | 1.065        | 0.949         | 1.140         | 1.048         | Q8IXJ9       | ASXL1         | Putative Polycomb group protein ASXL1                              |
| 1.015           | 1.007        | 1.029        | 0.999        | 0.976        | 1.021        | 0.970        | 1.021        | 1.003        | 0.967         | 1.014         | 1.027         | O60231       | DHX16         | Putative pre-mRNA-splicing factor ATP-dependent RNA helicase DHX16 |
| 1.070           | 0.803        | 1.042        | 0.927        | 1.087        | 1.032        | 1.043        | 1.015        | 1.061        | 1.000         | 0.980         | 1.045         | Q7L7V1       | DHX32         | Putative pre-mRNA-splicing factor ATP-dependent RNA helicase DHX32 |
| 1.088           | 0.986        | 1.073        | 1.033        | 0.994        | 1.038        | 1.045        | 1.094        | 1.039        | 0.951         | 0.996         | 0.926         | Q6P2P2       | PRMT9         | Putative protein arginine N-methyltransferase 9                    |
|                 |              |              |              |              |              | 1.038        | 1.012        | 1.251        |               |               |               | Q8IZP2       | ST13P4        | Putative protein FAM10A4                                           |
| 1.051           | 0.982        | 1.064        | 0.953        | 0.911        | 1.116        |              |              |              | 1.017         | 0.889         | 1.174         | B3EWG4       | FAM25BP       | Putative protein FAM25BP                                           |
| 1.007           | 0.992        | 1.018        | 1.089        | 1.079        | 1.195        | 1.003        | 0.994        | 1.060        | 1.087         | 1.133         | 1.135         | P58557       | YBEY          | Putative ribonuclease                                              |
| 0.946           | 0.894        | 1.069        | 0.986        | 1.067        | 1.013        | 0.983        | 1.034        | 1.023        | 1.020         | 0.935         | 1.023         | Q8N0V3       | RBFA          | Putative ribosome-binding factor A, mitochondrial                  |
| 0.956           | 0.989        | 1.024        | 0.969        | 0.949        | 1.055        | 0.974        | 0.963        | 1.016        | 0.977         | 0.965         | 1.063         | Q8IXW5       | RPAP2         | Putative RNA polymerase II subunit B1 CTD phosphatase RPAP2        |
| 1.032           | 1.008        | 0.987        | 1.010        | 0.952        | 0.998        | 1.014        | 1.002        | 0.966        | 1.048         | 1.021         | 1.023         | Q96T37       | RBM15         | Putative RNA-binding protein 15                                    |
| 1.073           | 1.006        | 1.071        | 0.998        | 0.943        | 1.018        | 0.995        | 1.033        | 1.047        | 1.000         | 1.005         | 1.051         | Q8NDT2       | RBM15B        | Putative RNA-binding protein 15B                                   |
| 1.048           | 0.935        | 1.058        | 1.017        | 0.906        | 1.087        | 1.192        | 0.955        | 1.114        | 1.006         | 0.969         | 1.126         | Q9NQ29       | LUC7L         | Putative RNA-binding protein Luc7-like 1                           |
| 0.986           | 1.009        | 0.980        | 0.997        | 1.021        | 1.019        | 1.020        | 0.994        | 0.989        | 1.012         | 0.996         | 1.027         | Q9Y383       | LUC7L2        | Putative RNA-binding protein Luc7-like 2                           |
| 0.978           | 0.968        | 1.019        | 0.988        | 0.958        | 1.093        | 0.965        | 0.984        | 1.065        | 0.997         | 0.994         | 0.981         | A8MWD9       | SNRPGP15      | Putative small nuclear ribonucleoprotein G-like protein 15         |
|                 |              |              | 0.997        | 0.834        | 0.951        | 0.841        | 0.927        | 0.986        |               |               |               | Q9HBR0       | SLC38A10      | Putative sodium-coupled neutral amino acid transporter 10          |
|                 |              |              | 1.006        | 0.601        | 1.106        | 1.067        | 1.048        | 1.041        | 0.979         | 1.110         | 1.006         | Q9NVC3       | SLC38A7       | Putative sodium-coupled neutral amino acid transporter 7           |
| 1.046           | 1.056        | 0.987        | 1.014        | 1.018        | 0.996        | 1.030        | 1.013        | 1.022        | 1.003         | 0.984         | 1.022         | Q5T440       | IBA57         | Putative transferase CAF17, mitochondrial                          |
| 1.050           | 0.970        | 0.993        | 1.024        | 0.979        | 0.994        | 1.031        | 1.006        | 0.944        | 1.015         | 0.903         | 0.960         | Q9UET6       | FTSJ1         | Putative tRNA (cytidine(32)/guanosine(34)-2'-O)-methyltransferase  |
| 1.050           | 0.928        | 1.133        | 0.979        | 0.997        | 0.975        | 0.911        | 1.044        | 1.008        | 1.014         | 1.033         | 1.065         | Q3MIT2       | PUS10         | Putative tRNA pseudouridine synthase Pus10                         |
|                 |              |              | 0.844        | 0.759        | 1.149        |              |              |              |               |               |               | Q5JXB2       | UBE2NL        | Putative ubiquitin-conjugating enzyme E2 N-like                    |
|                 |              |              | 1.001        | 0.976        | 1.168        |              |              |              |               |               |               | Q7Z3I0       | DKFZp313E1411 | Putative uncharacterized protein DKFZp313E1411                     |
|                 |              |              |              |              |              |              |              |              | 0.866         | 1.012         | 0.898         | A1L4Q6       | 5 SV          | Putative uncharacterized protein FLJ41423                          |
| 0.970           | 0.927        | 1.011        | 0.937        | 0.902        | 1.024        | 1.024        | 1.139        | 1.078        | 1.050         | 1.051         | 1.077         | Q53S08       | RAB6C         | Putative uncharacterized protein RAB6C                             |
| 1.194           | 0.924        | 1.063        | 1.110        | 0.885        | 0.990        | 1.189        | 1.080        | 1.060        | 1.039         | 1.045         | 0.887         | Q96N64       | PWWP2A        | PWWP domain-containing protein 2A                                  |
| 0.945           | 0.903        | 1.033        |              |              |              | 1.136        | 1.046        | 1.217        |               |               |               | J3KNX4       | MUM1          | PWWP domain-containing protein MUM1                                |
|                 |              |              | 1.011        | 0.975        | 1.121        | 1.052        | 1.063        | 1.040        | 0.969         | 0.940         | 1.036         | Q5TGL8       | PXDC1         | PX domain-containing protein 1                                     |
| 0.983           | 1.005        | 0.972        | 1.045        | 0.944        | 1.030        | 1.045        | 1.137        | 1.006        | 0.963         | 0.999         | 1.075         | Q7Z7A4       | PXK           | PX domain-containing protein kinase-like protein                   |
|                 |              |              | 0.936        | 1.180        | 1.220        | 0.678        | 0.722        | 0.657        |               |               |               | Q9Y3Y4       | PYGO1         | Pygopus homolog 1                                                  |



| Abundance Ratio |              |              |              |              |              |              |              |              |               |               |               | Accession ID | Gene name | Protein Description                                                      |
|-----------------|--------------|--------------|--------------|--------------|--------------|--------------|--------------|--------------|---------------|---------------|---------------|--------------|-----------|--------------------------------------------------------------------------|
| 1 d<br>M1/C1    | 1 d<br>M2/C2 | 1 d<br>M3/C3 | 4 d<br>M1/C1 | 4 d<br>M2/C2 | 4 d<br>M3/C3 | 7 d<br>M1/C1 | 7 d<br>M2/C2 | 7 d<br>M3/C3 | 10 d<br>M1/C1 | 10 d<br>M2/C2 | 10 d<br>M3/C3 |              |           |                                                                          |
| 1.155           | 1.025        | 1.095        | 0.929        | 0.893        | 1.118        | 0.937        | 1.095        | 1.122        | 0.963         | 1.013         | 0.892         | Q9BRQ0       | PYGO2     | Pygopus homolog 2                                                        |
|                 |              |              |              |              |              | 0.968        | 0.859        | 0.815        |               |               |               | Q8WU10       | PYROXD1   | Pyridine nucleotide-disulfide oxidoreductase domain-containing protein 1 |
| 1.015           | 0.998        | 1.020        | 1.010        | 1.057        | 0.988        | 0.975        | 1.018        | 1.031        | 1.003         | 1.002         | 1.005         | O00764       | PDXK      | Pyridoxal kinase                                                         |
| 0.988           | 1.031        | 0.976        | 0.997        | 0.971        | 1.030        | 1.013        | 1.054        | 1.036        | 0.970         | 1.012         | 0.992         | Q96GD0       | PDXP      | Pyridoxal phosphate phosphatase                                          |
| 0.992           | 0.980        | 1.015        | 0.977        | 0.946        | 0.979        | 1.003        | 1.027        | 1.018        | 0.968         | 0.935         | 0.998         | Q6P996       | PDXDC1    | Pyridoxal-dependent decarboxylase domain-containing protein 1            |
| 1.051           | 1.019        | 1.096        | 1.049        | 1.121        | 1.021        | 1.020        | 1.058        | 1.058        | 1.044         | 1.017         | 1.028         | Q9NVS9       | PNPO      | Pyridoxine-5'-phosphate oxidase                                          |
| 1.011           | 0.991        | 0.937        | 0.944        | 0.865        | 0.967        | 0.903        | 1.069        | 1.028        | 0.938         | 0.964         | 0.957         | Q9NXJ5       | PGPEP1    | Pyroglutamyl-peptidase 1                                                 |
| 0.959           | 1.048        | 1.013        | 1.002        | 0.968        | 0.999        | 0.968        | 1.057        | 0.982        | 0.985         | 0.998         | 0.987         | Q96C36       | PYCR2     | Pyrroline-5-carboxylate reductase 2                                      |
| 1.001           | 1.002        | 1.019        | 0.989        | 0.964        | 0.974        | 0.989        | 1.058        | 0.967        | 1.026         | 0.991         | 1.037         | A0A0A0MQS1   | PYCRL     | Pyrroline-5-carboxylate reductase                                        |
| 0.983           | 1.004        | 1.039        | 1.001        | 0.970        | 1.001        | 0.974        | 0.963        | 0.992        | 1.028         | 0.977         | 1.014         | P11498       | PC        | Pyruvate carboxylase, mitochondrial                                      |
| 0.989           | 1.007        | 0.982        | 1.001        | 1.000        | 0.992        | 1.017        | 1.036        | 0.977        | 1.018         | 1.000         | 0.986         | P11177       | PDHB      | Pyruvate dehydrogenase E1 component subunit beta, mitochondrial          |
| 1.003           | 1.004        | 0.995        | 0.992        | 1.005        | 0.991        | 0.998        | 0.982        | 0.989        | 1.040         | 0.986         | 1.015         | Q8NCN5       | PDPR      | Pyruvate dehydrogenase phosphatase regulatory subunit, mitochondrial     |
| 0.976           | 0.989        | 1.025        | 0.990        | 0.952        | 1.020        | 1.000        | 1.013        | 0.995        | 1.016         | 0.983         | 1.062         | O00330       | PDHX      | Pyruvate dehydrogenase protein X component, mitochondrial                |
| 1.022           | 0.998        | 1.008        | 1.001        | 1.074        | 0.978        | 0.975        | 0.963        | 1.014        | 0.931         | 0.974         | 0.944         | P14618       | PKM       | Pyruvate kinase PKM                                                      |
| 1.037           | 1.016        | 1.040        | 1.001        | 0.990        | 0.995        | 0.993        | 1.073        | 0.993        | 1.005         | 1.006         | 1.030         | Q9BXR0       | QTRT1     | Queuine tRNA-ribosyltransferase catalytic subunit 1                      |
| 1.031           | 1.005        | 0.985        | 0.999        | 0.991        | 0.968        | 0.993        | 1.012        | 0.983        | 1.035         | 0.979         | 0.973         | Q08257       | CRYZ      | Quinone oxidoreductase                                                   |
| 1.015           | 1.011        | 0.990        | 1.028        | 0.995        | 0.984        | 1.004        | 1.004        | 0.988        | 1.027         | 1.005         | 0.949         | Q53FA7       | TP53I3    | Quinone oxidoreductase PIG3                                              |
| 1.002           | 1.010        | 1.011        | 1.015        | 0.972        | 0.973        | 0.964        | 1.028        | 1.010        | 0.964         | 0.988         | 0.959         | O95825       | CRYZL1    | Quinone oxidoreductase-like protein 1                                    |
| 1.036           | 1.009        | 1.137        | 1.036        | 1.022        | 0.934        | 0.935        | 1.101        | 0.948        | 0.935         | 1.091         | 0.855         | A0A0R4J2E2   | R3HCC1    | R3H and coiled-coil domain-containing protein 1                          |
|                 |              |              | 1.025        | 0.657        | 0.917        | 0.993        | 1.130        | 1.278        |               |               |               | B5MCG9       | R3HDM2    | R3H domain-containing protein 2                                          |
| 1.036           | 1.044        | 1.062        |              |              |              |              |              |              | 0.870         | 0.859         | 1.056         | Q96D70       | R3HDM4    | R3H domain-containing protein 4                                          |
|                 |              |              | 0.852        | 0.873        | 1.023        | 0.914        | 1.062        | 0.951        |               |               |               | Q5SX86       | GDI2      | Rab GDP dissociation inhibitor (Fragment)                                |
| 1.025           | 1.000        | 1.005        | 1.009        | 1.068        | 0.981        | 0.986        | 0.994        | 1.023        | 0.980         | 0.999         | 0.993         | P31150       | GDI1      | Rab GDP dissociation inhibitor alpha                                     |
| 1.020           | 1.011        | 0.985        | 1.008        | 1.082        | 0.998        | 1.009        | 1.045        | 1.026        | 0.994         | 1.017         | 0.996         | P50395       | GDI2      | Rab GDP dissociation inhibitor beta                                      |
| 1.022           | 0.953        | 1.045        | 1.145        | 0.930        | 1.003        | 1.053        | 0.953        | 1.001        | 1.161         | 0.909         | 1.029         | Q9Y3P9       | RABGAP1   | Rab GTPase-activating protein 1                                          |
| 1.034           | 0.990        | 1.016        | 0.979        | 0.975        | 1.009        | 1.022        | 1.035        | 1.020        | 1.017         | 1.035         | 1.015         | Q5R372       | RABGAP1L  | Rab GTPase-activating protein 1-like                                     |
| 1.024           | 0.983        | 1.021        | 1.017        | 0.982        | 1.054        | 1.005        | 0.971        | 1.027        | 1.068         | 0.990         | 1.058         | Q15276       | RABEP1    | Rab GTPase-binding effector protein 1                                    |
| 1.013           | 0.997        | 1.027        | 1.029        | 1.004        | 1.074        | 1.055        | 1.030        | 0.978        | 1.044         | 1.011         | 1.082         | Q9H5N1       | RABEP2    | Rab GTPase-binding effector protein 2                                    |
| 1.023           | 0.988        | 1.006        | 0.989        | 0.908        | 1.000        | 0.972        | 1.076        | 1.033        | 1.021         | 0.997         | 1.031         | P24386       | CHM       | Rab proteins geranylgeranyltransferase component A 1                     |

| Abundance Ratio |              |              |              |              |              |              |              |              |               |               |               | Accession ID | Gene name | Protein Description                                                      |
|-----------------|--------------|--------------|--------------|--------------|--------------|--------------|--------------|--------------|---------------|---------------|---------------|--------------|-----------|--------------------------------------------------------------------------|
| 1 d<br>M1/C1    | 1 d<br>M2/C2 | 1 d<br>M3/C3 | 4 d<br>M1/C1 | 4 d<br>M2/C2 | 4 d<br>M3/C3 | 7 d<br>M1/C1 | 7 d<br>M2/C2 | 7 d<br>M3/C3 | 10 d<br>M1/C1 | 10 d<br>M2/C2 | 10 d<br>M3/C3 |              |           |                                                                          |
| 0.983           | 0.952        | 0.944        | 1.020        | 0.894        | 1.008        | 0.930        | 1.148        | 1.006        | 0.935         | 0.947         | 0.961         | P26374       | CHML      | Rab proteins geranylgeranyltransferase component A 2                     |
| 1.024           | 1.053        | 1.025        | 0.988        | 0.977        | 1.048        | 1.016        | 1.070        | 1.031        | 0.974         | 1.007         | 1.042         | Q6WKZ4       | RAB11FIP1 | Rab11 family-interacting protein 1                                       |
| 1.039           | 0.989        | 1.038        | 0.990        | 0.997        | 1.025        | 1.009        | 1.001        | 1.033        | 1.058         | 1.018         | 1.109         | A0A1B0GTL5   | RAB11FIP5 | Rab11 family-interacting protein 5                                       |
| 0.994           | 1.016        | 1.013        | 1.007        | 0.976        | 1.026        | 1.004        | 1.010        | 1.005        | 1.003         | 0.995         | 1.032         | Q15042       | RAB3GAP1  | Rab3 GTPase-activating protein catalytic subunit                         |
| 1.025           | 0.977        | 1.022        | 1.014        | 0.967        | 1.023        | 1.019        | 1.052        | 1.016        | 1.021         | 1.004         | 1.025         | Q9H2M9       | RAB3GAP2  | Rab3 GTPase-activating protein non-catalytic subunit                     |
| 1.143           | 1.067        | 1.046        | 1.012        | 1.002        | 1.089        | 1.038        | 1.020        | 0.974        | 1.040         | 1.006         | 1.108         | Q96QF0       | RAB3IP    | Rab-3A-interacting protein                                               |
| 1.033           | 0.996        | 1.007        | 1.019        | 1.026        | 1.068        | 1.053        | 1.012        | 1.011        | 1.042         | 0.980         | 1.017         | Q9UJ41       | RABGEF1   | Rab5 GDP/GTP exchange factor                                             |
| 0.951           | 0.913        | 1.540        | 1.075        | 1.003        | 1.437        |              |              |              |               |               |               | Q4ADV7       | RIC1      | RAB6A-GEF complex partner protein 1                                      |
|                 |              |              |              |              |              |              |              |              | 0.998         | 0.918         | 0.792         | Q92546       | RGP1      | RAB6A-GEF complex partner protein 2                                      |
| 0.925           | 0.933        | 1.208        | 0.953        | 0.948        | 1.078        | 1.006        | 0.923        | 0.925        |               |               |               | Q5T7V8       | GORAB     | RAB6-interacting golgin                                                  |
| 1.156           | 1.016        | 1.062        | 1.038        | 1.051        | 1.008        | 1.023        | 0.973        | 0.991        | 1.013         | 1.023         | 1.108         | Q7Z6M1       | RABEPK    | Rab9 effector protein with kelch motifs                                  |
| 1.141           | 0.988        | 1.202        | 1.012        | 0.957        | 1.050        | 1.042        | 1.039        | 1.071        | 0.909         | 1.024         | 1.019         | Q9H1K0       | RBSN      | Rabenosyn-5                                                              |
|                 |              |              |              |              |              | 1.072        | 1.238        | 0.925        | 1.034         | 1.011         | 0.984         | Q96NA2       | RILP      | Rab-interacting lysosomal protein                                        |
| 1.066           | 1.040        | 1.029        | 1.002        | 0.940        | 0.952        | 1.010        | 1.066        | 0.981        | 1.024         | 0.989         | 1.002         | Q5HYI8       | RABL3     | Rab-like protein 3                                                       |
| 1.047           | 0.963        | 0.991        | 0.995        | 0.964        | 0.980        | 1.021        | 0.949        | 0.982        | 1.033         | 0.932         | 1.000         | Q3YEC7       | RABL6     | Rab-like protein 6                                                       |
| 0.981           | 1.049        | 1.062        | 1.025        | 1.083        | 1.058        | 1.104        | 1.012        | 1.009        | 1.056         | 1.039         | 1.147         | Q9H0H5       | RACGAP1   | Rac GTPase-activating protein 1                                          |
| 1.015           | 1.023        | 1.027        | 0.972        | 0.982        | 1.061        | 1.061        | 1.088        | 1.036        | 1.019         | 1.064         | 1.043         | P31749       | AKT1      | RAC-alpha serine/threonine-protein kinase                                |
| 0.964           | 0.990        | 0.960        | 1.014        | 0.975        | 1.052        | 1.012        | 1.066        | 1.050        | 0.982         | 1.007         | 1.039         | P31751       | AKT2      | RAC-beta serine/threonine-protein kinase                                 |
| 1.078           | 1.058        | 0.988        | 1.018        | 0.956        | 1.035        | 0.983        | 1.115        | 1.038        | 0.987         | 1.019         | 1.089         | Q9Y243       | AKT3      | RAC-gamma serine/threonine-protein kinase                                |
| 1.010           | 1.018        | 1.044        | 0.992        | 0.943        | 1.027        | 1.062        | 1.064        | 1.078        | 1.008         | 1.031         | 1.007         | Q6NUQ1       | RINT1     | RAD50-interacting protein 1                                              |
| 0.933           | 1.044        | 1.116        | 1.063        | 0.926        | 1.045        | 2.402        | 1.261        | 1.541        | 1.580         | 1.055         | 1.181         | Q9HA92       | RSAD1     | Radical S-adenosyl methionine domain-containing protein 1, mitochondrial |
| 0.917           | 1.016        | 1.041        | 0.982        | 0.988        | 1.052        | 1.050        | 0.905        | 1.042        | 1.097         | 1.041         | 1.142         | Q14699       | RFTN1     | Raftlin                                                                  |
| 1.001           | 1.037        | 1.007        | 1.050        | 0.914        | 1.005        | 1.003        | 1.025        | 1.031        | 1.024         | 0.967         | 0.970         | Q6IAA8       | LAMTOR1   | Ragulator complex protein LAMTOR1                                        |
| 1.006           | 1.018        | 0.994        | 1.015        | 1.031        | 1.016        | 0.999        | 1.053        | 1.035        | 1.005         | 0.994         | 1.023         | Q9Y2Q5       | LAMTOR2   | Ragulator complex protein LAMTOR2                                        |
| 1.051           | 0.955        | 1.014        | 0.978        | 0.960        | 0.943        | 0.905        | 1.101        | 1.003        | 0.919         | 1.012         | 0.971         | Q9UHA4       | LAMTOR3   | Ragulator complex protein LAMTOR3                                        |
| 0.891           | 1.004        | 0.914        | 0.996        | 0.990        | 1.033        | 0.997        | 1.065        | 0.913        | 0.989         | 1.026         | 1.028         | C9JXA7       | LAMTOR4   | Ragulator complex protein LAMTOR4                                        |
| 1.015           | 0.969        | 0.995        | 0.999        | 1.010        | 1.004        | 0.944        | 1.019        | 0.942        | 0.923         | 1.016         | 0.899         | O43504       | LAMTOR5   | Ragulator complex protein LAMTOR5                                        |
| 0.994           | 0.979        | 1.015        | 0.974        | 1.007        | 1.061        | 0.981        | 1.042        | 1.029        | 0.991         | 0.983         | 1.049         | A0A1B0GUI1   | RALGAPA1  | Ral GTPase-activating protein subunit alpha-1                            |
| 1.106           | 1.011        | 1.078        | 0.983        | 0.969        | 1.012        | 0.985        | 1.023        | 1.030        | 0.912         | 0.998         | 0.966         | Q2PPJ7       | RALGAPA2  | Ral GTPase-activating protein subunit alpha-2                            |
| 1.029           | 1.019        | 1.016        | 0.993        | 0.987        | 1.015        | 1.018        | 1.058        | 0.999        | 0.993         | 1.007         | 1.003         | Q86X10       | RALGAPB   | Ral GTPase-activating protein subunit beta                               |
| 0.923           | 1.046        | 0.953        | 0.981        | 0.950        | 0.987        | 0.980        | 1.025        | 1.029        | 1.054         | 0.985         | 1.053         | O15211       | RGL2      | Ral guanine nucleotide dissociation stimulator-like 2                    |

| Abundance Ratio |              |              |              |              |              |              |              |              |               |               |               | Accession ID | Gene name | Protein Description                                        |
|-----------------|--------------|--------------|--------------|--------------|--------------|--------------|--------------|--------------|---------------|---------------|---------------|--------------|-----------|------------------------------------------------------------|
| 1 d<br>M1/C1    | 1 d<br>M2/C2 | 1 d<br>M3/C3 | 4 d<br>M1/C1 | 4 d<br>M2/C2 | 4 d<br>M3/C3 | 7 d<br>M1/C1 | 7 d<br>M2/C2 | 7 d<br>M3/C3 | 10 d<br>M1/C1 | 10 d<br>M2/C2 | 10 d<br>M3/C3 |              |           |                                                            |
| 1.029           | 0.918        | 1.076        | 1.009        | 0.958        | 1.015        | 1.090        | 1.107        | 1.056        | 1.057         | 1.051         | 1.078         | Q15311       | RALBP1    | RalA-binding protein 1                                     |
| 1.017           | 1.016        | 1.025        | 1.031        | 0.944        | 0.980        | 0.973        | 1.051        | 0.986        | 1.007         | 1.044         | 0.996         | Q96D71       | REPS1     | RalBP1-associated Eps domain-containing protein 1          |
| 0.966           | 1.013        | 1.017        | 0.988        | 0.997        | 0.991        | 1.037        | 1.049        | 1.008        | 0.990         | 0.968         | 1.010         | P46060       | RANGAP1   | Ran GTPase-activating protein 1                            |
|                 |              |              | 0.928        | 0.805        | 0.970        | 0.950        | 0.974        | 1.027        | 1.096         | 0.931         | 1.101         | Q9HD47       | RANGRF    | Ran guanine nucleotide release factor                      |
| 1.077           | 1.080        | 1.058        | 1.017        | 0.919        | 0.986        | 0.963        | 1.150        | 0.947        | 1.063         | 0.985         | 1.020         | R4GMX8       | RANBP10   | Ran-binding protein 10                                     |
|                 |              |              |              |              |              | 0.999        | 1.333        | 1.101        | 1.329         | 1.003         | 0.934         | Q9H2T7       | RANBP17   | Ran-binding protein 17                                     |
|                 |              |              |              |              |              |              |              |              | 1.081         | 1.029         | 0.938         | Q9H6Z4       | RANBP3    | Ran-binding protein 3                                      |
| 1.061           | 0.970        | 1.043        | 1.013        | 0.946        | 0.989        | 0.993        | 1.068        | 1.120        | 0.902         | 1.009         | 1.039         | O60518       | RANBP6    | Ran-binding protein 6                                      |
| 1.111           | 1.053        | 1.038        | 0.987        | 0.892        | 1.014        | 0.966        | 1.149        | 1.017        | 0.873         | 1.031         | 1.039         | Q96S59       | RANBP9    | Ran-binding protein 9                                      |
|                 |              |              |              |              |              |              |              |              | 1.284         | 1.126         | 1.083         | F8VYC4       | RGPD1     | RANBP2-like and GRIP domain-containing protein 1           |
| 1.059           | 0.956        | 0.976        | 1.098        | 0.937        | 1.035        | 1.115        | 1.094        | 1.074        | 0.860         | 1.021         | 0.927         | O14715       | RGPD8     | RANBP2-like and GRIP domain-containing protein 8           |
| 0.923           | 0.974        | 1.003        | 0.946        | 0.910        | 1.000        | 0.926        | 0.850        | 0.983        | 0.995         | 0.974         | 1.030         | Q9BYM8       | RBCK1     | RanBP-type and C3HC4-type zinc finger-containing protein 1 |
| 0.991           | 0.957        | 0.991        | 0.971        | 1.072        | 0.954        | 0.979        | 0.991        | 1.003        | 0.919         | 0.975         | 0.921         | F6WQW2       | RANBP1    | Ran-specific GTPase-activating protein                     |
| 0.932           | 1.067        | 1.066        | 1.107        | 0.954        | 0.862        | 1.024        | 1.047        | 1.064        | 0.996         | 0.954         | 0.957         | Q9Y4G8       | RAPGEF2   | Rap guanine nucleotide exchange factor 2                   |
| 0.714           | 0.770        | 1.554        |              |              |              |              |              |              |               |               |               | O95398       | RAPGEF3   | Rap guanine nucleotide exchange factor 3                   |
|                 |              |              | 0.914        | 0.724        | 1.117        |              |              |              | 0.948         | 1.035         | 1.203         | A8MQ07       | RAPGEF5   | Rap guanine nucleotide exchange factor 5                   |
| 0.899           | 0.908        | 1.008        |              |              |              | 1.047        | 1.150        | 0.923        | 0.986         | 1.091         | 1.341         | Q8IZ41       | RASEF     | Ras and EF-hand domain-containing protein                  |
| 1.097           | 1.095        | 1.051        | 1.011        | 0.987        | 0.978        | 1.021        | 1.014        | 1.002        | 0.991         | 0.992         | 1.034         | Q13671       | RIN1      | Ras and Rab interactor 1                                   |
|                 |              |              | 0.977        | 0.757        | 0.708        |              |              |              |               |               |               | Q8TB24       | RIN3      | Ras and Rab interactor 3                                   |
| 1.046           | 1.012        | 0.975        | 1.008        | 0.988        | 0.940        | 1.016        | 1.014        | 1.013        | 1.036         | 0.990         | 1.201         | P50749       | RASSF2    | Ras association domain-containing protein 2                |
| 0.968           | 0.965        | 1.081        | 1.007        | 0.939        | 1.108        | 1.030        | 1.048        | 0.959        | 1.063         | 1.148         | 1.107         | Q86WH2       | RASSF3    | Ras association domain-containing protein 3                |
| 1.048           | 0.909        | 1.169        | 1.022        | 0.838        | 1.024        |              |              |              | 0.983         | 1.014         | 1.068         | A0A0G2JMW4   | RASSF7    | Ras association domain-containing protein 7                |
|                 |              |              | 0.884        | 0.827        | 1.067        | 0.933        | 0.977        | 0.938        |               |               |               | Q8NHQ8       | RASSF8    | Ras association domain-containing protein 8                |
| 1.003           | 1.000        | 1.017        | 0.985        | 0.974        | 1.035        | 0.992        | 1.065        | 1.035        | 0.986         | 1.041         | 1.021         | P20936       | RASA1     | Ras GTPase-activating protein 1                            |
| 1.142           | 0.915        | 1.032        | 1.032        | 0.953        | 1.038        | 1.036        | 1.039        | 1.033        | 0.956         | 0.979         | 1.041         | A0A0A0MSJ9   | RASA2     | Ras GTPase-activating protein 2                            |
| 1.028           | 0.973        | 1.021        | 1.039        | 0.987        | 1.060        | 1.037        | 1.096        | 1.013        | 0.971         | 1.004         | 1.039         | Q14644       | RASA3     | Ras GTPase-activating protein 3                            |
| 1.014           | 1.030        | 1.014        | 1.001        | 1.022        | 0.969        | 1.012        | 1.103        | 1.032        | 0.984         | 1.040         | 1.057         | Q13283       | G3BP1     | Ras GTPase-activating protein-binding protein 1            |
| 0.990           | 0.998        | 0.994        | 0.976        | 0.987        | 0.989        | 1.005        | 1.010        | 0.994        | 1.039         | 1.022         | 1.076         | Q9UN86       | G3BP2     | Ras GTPase-activating protein-binding protein 2            |
| 0.960           | 1.003        | 0.974        | 0.997        | 0.996        | 0.990        | 0.977        | 1.044        | 0.999        | 0.986         | 0.994         | 0.976         | P46940       | IQGAP1    | Ras GTPase-activating-like protein IQGAP1                  |
| 1.004           | 1.026        | 1.009        | 1.028        | 0.982        | 1.000        | 1.062        | 1.129        | 1.060        | 0.966         | 0.921         | 1.108         | Q86VI3       | IQGAP3    | Ras GTPase-activating-like protein IQGAP3                  |
| 0.989           | 0.988        | 0.995        | 0.975        | 0.988        | 0.997        | 1.029        | 1.006        | 1.012        | 0.982         | 0.953         | 1.030         | Q15404       | RSU1      | Ras suppressor protein 1                                   |

| Abundance Ratio |              |              |              |              |              |              |              |              |               |               |               | Accession ID | Gene name | Protein Description                                                 |
|-----------------|--------------|--------------|--------------|--------------|--------------|--------------|--------------|--------------|---------------|---------------|---------------|--------------|-----------|---------------------------------------------------------------------|
| 1 d<br>M1/C1    | 1 d<br>M2/C2 | 1 d<br>M3/C3 | 4 d<br>M1/C1 | 4 d<br>M2/C2 | 4 d<br>M3/C3 | 7 d<br>M1/C1 | 7 d<br>M2/C2 | 7 d<br>M3/C3 | 10 d<br>M1/C1 | 10 d<br>M2/C2 | 10 d<br>M3/C3 |              |           |                                                                     |
| 1.045           | 1.034        | 1.058        | 1.034        | 0.955        | 0.970        | 1.020        | 1.005        | 0.974        | 0.980         | 0.942         | 1.045         | Q70E73       | RAPH1     | Ras-associated and pleckstrin homology domains-containing protein 1 |
| 1.058           | 1.048        | 0.974        | 1.032        | 1.077        | 0.933        | 1.055        | 0.975        | 1.051        | 0.989         | 1.023         | 0.928         | P63000       | RAC1      | Ras-related C3 botulinum toxin substrate 1                          |
| 1.198           | 1.089        | 1.140        | 0.959        | 0.903        | 0.997        | 0.961        | 1.302        | 0.930        | 0.892         | 1.008         | 0.897         | P60763       | RAC3      | Ras-related C3 botulinum toxin substrate 3                          |
| 1.045           | 0.983        | 0.995        | 0.990        | 0.978        | 0.887        | 0.895        | 0.887        | 1.016        | 0.906         | 1.090         | 0.906         | Q7L523       | RRAGA     | Ras-related GTP-binding protein A                                   |
| 1.006           | 1.004        | 1.012        | 0.972        | 0.963        | 1.013        | 0.928        | 0.966        | 1.030        | 0.908         | 0.976         | 0.934         | Q9HB90       | RRAGC     | Ras-related GTP-binding protein C                                   |
|                 |              |              |              |              |              |              |              |              | 1.040         | 1.098         | 0.983         | Q9NQL2       | RRAGD     | Ras-related GTP-binding protein D                                   |
| 0.983           | 0.962        | 1.011        | 0.986        | 0.912        | 1.034        | 1.006        | 1.046        | 1.042        | 1.040         | 1.038         | 1.057         | P61026       | RAB10     | Ras-related protein Rab-10                                          |
| 0.981           | 1.001        | 0.980        | 0.987        | 0.940        | 1.008        | 1.014        | 1.063        | 1.011        | 1.027         | 1.015         | 0.987         | Q15907       | RAB11B    | Ras-related protein Rab-11B                                         |
| 0.960           | 0.951        | 1.104        | 1.031        | 0.895        | 0.981        | 1.018        | 1.069        | 1.008        | 0.987         | 1.053         | 1.037         | Q6IQ22       | RAB12     | Ras-related protein Rab-12                                          |
| 0.964           | 0.998        | 0.982        | 1.010        | 0.944        | 1.055        | 1.049        | 1.055        | 1.040        | 1.094         | 1.104         | 1.068         | P51153       | RAB13     | Ras-related protein Rab-13                                          |
| 0.958           | 0.998        | 0.975        | 1.014        | 0.941        | 1.015        | 1.000        | 1.027        | 1.013        | 1.005         | 1.010         | 0.981         | P61106       | RAB14     | Ras-related protein Rab-14                                          |
| 0.933           | 0.997        | 0.976        | 0.980        | 0.945        | 1.069        | 1.009        | 1.056        | 1.012        | 1.029         | 0.987         | 1.024         | Q9NP72       | RAB18     | Ras-related protein Rab-18                                          |
| 0.971           | 0.986        | 0.973        | 0.980        | 0.895        | 1.000        | 0.989        | 1.027        | 1.000        | 1.000         | 1.031         | 0.954         | P62820       | RAB1A     | Ras-related protein Rab-1A                                          |
| 0.887           | 1.038        | 0.977        | 0.957        | 0.928        | 0.984        | 0.949        | 0.921        | 0.943        | 0.945         | 1.059         | 0.956         | Q9H0U4       | RAB1B     | Ras-related protein Rab-1B                                          |
|                 |              |              |              |              |              |              |              |              | 0.940         | 1.067         | 1.021         | Q9NX57       | RAB20     | Ras-related protein Rab-20                                          |
| 1.034           | 1.033        | 0.960        | 1.070        | 1.087        | 1.058        | 1.125        | 0.937        | 1.097        | 1.026         | 1.017         | 1.014         | Q9UL25       | RAB21     | Ras-related protein Rab-21                                          |
| 0.974           | 0.986        | 1.030        | 0.963        | 0.908        | 1.055        | 0.988        | 1.056        | 1.085        | 0.986         | 1.019         | 1.047         | Q9UL26       | RAB22A    | Ras-related protein Rab-22A                                         |
| 0.938           | 0.964        | 1.029        | 1.030        | 0.945        | 1.120        | 0.996        | 0.996        | 0.980        | 1.002         | 0.965         | 1.037         | Q9ULC3       | RAB23     | Ras-related protein Rab-23                                          |
| 1.042           | 1.042        | 1.032        | 1.002        | 0.849        | 1.001        | 1.008        | 1.056        | 0.980        | 1.008         | 1.085         | 1.004         | Q969Q5       | RAB24     | Ras-related protein Rab-24                                          |
| 1.029           | 0.988        | 1.012        | 1.010        | 0.941        | 1.026        | 1.038        | 0.965        | 0.975        | 1.083         | 0.987         | 1.074         | P51159       | RAB27A    | Ras-related protein Rab-27A                                         |
| 0.961           | 0.899        | 1.027        | 1.042        | 0.858        | 1.014        | 1.010        | 1.035        | 0.996        | 1.077         | 1.112         | 1.173         | O00194       | RAB27B    | Ras-related protein Rab-27B                                         |
| 0.945           | 1.219        | 1.423        | 0.840        | 0.906        | 1.168        | 1.054        | 0.884        | 1.016        | 0.978         | 1.090         | 1.062         | P51157       | RAB28     | Ras-related protein Rab-28                                          |
| 0.979           | 0.985        | 1.001        | 0.965        | 0.907        | 0.998        | 0.984        | 1.033        | 1.012        | 0.973         | 1.017         | 0.985         | P61019       | RAB2A     | Ras-related protein Rab-2A                                          |
| 1.020           | 0.999        | 0.981        | 0.929        | 0.905        | 0.942        | 0.981        | 0.952        | 0.979        | 1.004         | 1.075         | 1.055         | Q8WUD1       | RAB2B     | Ras-related protein Rab-2B                                          |
| 1.107           | 0.957        | 1.050        | 0.881        | 0.896        | 1.141        |              |              |              |               |               |               | Q15771       | RAB30     | Ras-related protein Rab-30                                          |
| 1.005           | 0.957        | 0.997        | 1.023        | 0.879        | 1.003        | 1.004        | 1.041        | 1.033        | 0.982         | 1.013         | 0.985         | Q13636       | RAB31     | Ras-related protein Rab-31                                          |
| 0.987           | 0.987        | 1.002        | 0.944        | 0.892        | 1.018        | 0.953        | 1.053        | 1.023        | 1.015         | 0.996         | 0.970         | Q13637       | RAB32     | Ras-related protein Rab-32                                          |
| 0.992           | 0.961        | 1.123        | 0.966        | 0.955        | 1.006        | 0.995        | 0.956        | 1.011        | 1.125         | 1.004         | 1.092         | Q9H082       | RAB33B    | Ras-related protein Rab-33B                                         |
| 0.979           | 0.986        | 0.992        | 1.009        | 0.939        | 1.026        | 1.028        | 1.096        | 1.075        | 1.038         | 1.026         | 1.047         | Q9BZG1       | RAB34     | Ras-related protein Rab-34                                          |
| 1.232           | 0.757        | 1.011        | 0.823        | 0.937        | 0.795        |              |              |              | 0.987         | 1.028         | 1.244         | A0A1B0GTQ2   | RAB34     | Ras-related protein Rab-34, isoform NARR                            |
| 0.955           | 1.012        | 0.957        | 1.028        | 0.938        | 0.995        | 1.058        | 1.047        | 0.977        | 1.122         | 1.083         | 1.069         | Q15286       | RAB35     | Ras-related protein Rab-35                                          |
| 0.916           | 1.103        | 1.171        | 1.004        | 0.854        | 1.082        | 1.002        | 1.266        | 1.127        | 1.341         | 1.058         | 1.077         | Q14964       | RAB39A    | Ras-related protein Rab-39A                                         |
| 0.922           | 0.962        | 1.016        | 1.013        | 0.939        | 1.067        | 1.016        | 1.011        | 1.055        | 0.942         | 0.975         | 1.028         | P20337       | RAB3B     | Ras-related protein Rab-3B                                          |

| Abundance Ratio |              |              |              |              |              |              |              |              |               |               |               | Accession ID | Gene name | Protein Description                                      |
|-----------------|--------------|--------------|--------------|--------------|--------------|--------------|--------------|--------------|---------------|---------------|---------------|--------------|-----------|----------------------------------------------------------|
| 1 d<br>M1/C1    | 1 d<br>M2/C2 | 1 d<br>M3/C3 | 4 d<br>M1/C1 | 4 d<br>M2/C2 | 4 d<br>M3/C3 | 7 d<br>M1/C1 | 7 d<br>M2/C2 | 7 d<br>M3/C3 | 10 d<br>M1/C1 | 10 d<br>M2/C2 | 10 d<br>M3/C3 |              |           |                                                          |
| 1.020           | 1.006        | 0.983        | 0.989        | 0.929        | 0.964        | 0.993        | 1.065        | 1.022        | 1.026         | 1.045         | 0.943         | Q95716       | RAB3D     | Ras-related protein Rab-3D                               |
| 1.127           | 1.143        | 1.026        | 1.024        | 0.903        | 0.990        | 0.991        | 1.110        | 0.962        | 1.002         | 1.015         | 0.950         | Q86YS6       | RAB43     | Ras-related protein Rab-43                               |
| 1.006           | 0.979        | 0.971        | 1.009        | 0.876        | 1.005        | 1.029        | 1.099        | 1.009        | 1.000         | 1.045         | 0.974         | P20338       | RAB4A     | Ras-related protein Rab-4A                               |
| 0.993           | 0.985        | 0.970        | 0.981        | 0.884        | 0.988        | 1.000        | 0.999        | 0.960        | 1.031         | 1.060         | 1.071         | P20339       | RAB5A     | Ras-related protein Rab-5A                               |
| 0.960           | 1.006        | 0.979        | 0.994        | 0.941        | 1.028        | 0.984        | 1.028        | 1.010        | 1.012         | 1.073         | 1.060         | P61020       | RAB5B     | Ras-related protein Rab-5B                               |
| 0.924           | 0.985        | 0.973        | 0.965        | 0.898        | 1.003        | 1.005        | 1.013        | 1.013        | 0.988         | 1.028         | 1.010         | P20340       | RAB6A     | Ras-related protein Rab-6A                               |
| 0.971           | 0.985        | 1.026        | 0.956        | 0.933        | 1.051        | 1.028        | 1.037        | 1.029        | 1.124         | 1.076         | 0.977         | Q9NRW1       | RAB6B     | Ras-related protein Rab-6B                               |
| 1.026           | 1.012        | 1.005        | 1.005        | 0.971        | 0.991        | 1.016        | 1.026        | 1.002        | 1.011         | 1.051         | 0.944         | P51149       | RAB7A     | Ras-related protein Rab-7a                               |
| 0.949           | 1.006        | 0.989        | 0.994        | 0.910        | 1.008        | 1.026        | 1.072        | 1.034        | 1.029         | 1.000         | 1.027         | O14966       | RAB29     | Ras-related protein Rab-7L1                              |
| 0.992           | 1.010        | 0.971        | 1.011        | 0.879        | 1.027        | 1.048        | 1.135        | 0.972        | 1.108         | 1.097         | 1.092         | P61006       | RAB8A     | Ras-related protein Rab-8A                               |
| 1.008           | 1.005        | 0.987        | 0.999        | 1.082        | 0.995        | 1.107        | 1.135        | 1.004        | 0.866         | 1.133         | 0.977         | Q92930       | RAB8B     | Ras-related protein Rab-8B                               |
| 0.998           | 0.987        | 1.057        | 1.026        | 0.984        | 1.038        | 1.085        | 1.092        | 1.074        | 1.069         | 1.020         | 1.065         | P51151       | RAB9A     | Ras-related protein Rab-9A                               |
| 0.949           | 0.967        | 0.954        | 0.979        | 0.952        | 1.035        | 1.008        | 1.008        | 0.961        | 1.013         | 1.007         | 0.982         | P11233       | RALA      | Ras-related protein Ral-A                                |
| 0.881           | 0.937        | 0.999        | 1.052        | 0.975        | 1.013        | 1.027        | 1.027        | 1.001        | 1.015         | 1.051         | 1.007         | P62834       | RAP1A     | Ras-related protein Rap-1A                               |
| 1.037           | 0.982        | 0.986        | 1.031        | 1.021        | 1.014        | 1.015        | 1.024        | 0.987        | 1.035         | 1.023         | 0.980         | P61224       | RAP1B     | Ras-related protein Rap-1b                               |
| 0.907           | 1.020        | 1.035        | 0.987        | 0.949        | 1.029        | 1.011        | 1.116        | 1.026        | 1.018         | 0.993         | 1.111         | P61225       | RAP2B     | Ras-related protein Rap-2b                               |
| 0.980           | 1.010        | 0.934        | 1.006        | 0.922        | 1.036        | 1.045        | 1.102        | 1.004        | 1.033         | 1.066         | 0.994         | Q9Y3L5       | RAP2C     | Ras-related protein Rap-2c                               |
| 0.923           | 0.993        | 1.005        | 0.953        | 0.893        | 1.026        | 0.998        | 1.077        | 0.994        | 1.058         | 1.002         | 1.050         | P10301       | RRAS      | Ras-related protein R-Ras                                |
| 1.036           | 1.023        | 0.950        | 1.011        | 0.970        | 1.040        | 1.123        | 0.980        | 1.213        | 1.097         | 0.956         | 1.027         | Q86X27       | RALGPS2   | Ras-specific guanine nucleotide-releasing factor RalGPS2 |
| 0.905           | 0.860        | 1.297        | 0.962        | 0.731        | 1.082        | 1.038        | 0.973        | 1.026        | 1.029         | 0.996         | 1.107         | Q8TDY2       | RB1CC1    | RB1-inducible coiled-coil protein 1                      |
|                 |              |              | 1.008        | 0.894        | 0.955        | 1.066        | 1.248        | 1.129        | 1.169         | 0.930         | 1.162         | Q8NDN9       | RCBTB1    | RCC1 and BTB domain-containing protein 1                 |
| 1.031           | 0.938        | 0.977        | 0.968        | 0.955        | 1.004        | 1.024        | 1.051        | 1.079        |               |               |               | B4DWG0       | RCBTB2    | RCC1 and BTB domain-containing protein 2                 |
| 1.031           | 1.042        | 0.925        | 1.012        | 0.870        | 1.031        | 0.900        | 0.833        | 0.889        |               |               |               | A6NED2       | RCCD1     | RCC1 domain-containing protein 1                         |
| 0.933           | 0.941        | 1.013        | 0.975        | 1.037        | 1.036        | 1.040        | 1.028        | 1.085        | 1.024         | 1.032         | 0.982         | Q96I51       | RCC1L     | RCC1-like G exchanging factor-like protein               |
|                 |              |              |              |              |              | 0.970        | 1.123        | 0.781        |               |               |               | Q13127       | REST      | RE1-silencing transcription factor                       |
| 0.916           | 0.923        | 1.014        | 1.093        | 0.806        | 1.070        | 1.025        | 1.108        | 1.031        | 1.004         | 1.018         | 1.045         | P60602       | ROMO1     | Reactive oxygen species modulator 1                      |
| 1.024           | 1.018        | 0.996        | 0.997        | 1.004        | 0.953        | 1.013        | 1.019        | 0.953        | 1.002         | 1.032         | 0.970         | Q6NUK4       | REEP3     | Receptor expression-enhancing protein 3                  |
| 0.914           | 1.005        | 1.072        | 1.032        | 0.942        | 1.042        | 0.890        | 0.831        | 1.009        | 0.998         | 1.035         | 1.133         | Q9H6H4       | REEP4     | Receptor expression-enhancing protein 4                  |
| 1.008           | 0.963        | 1.058        | 1.016        | 0.953        | 0.988        | 1.041        | 0.965        | 0.984        | 0.995         | 1.031         | 1.007         | Q00765       | REEP5     | Receptor expression-enhancing protein 5                  |
| 0.824           | 0.962        | 0.998        | 0.963        | 0.896        | 1.090        | 0.918        | 0.915        | 1.049        | 1.029         | 0.974         | 1.094         | Q96HR9       | REEP6     | Receptor expression-enhancing protein 6                  |
| 1.060           | 0.997        | 1.015        | 1.045        | 1.268        | 0.990        | 1.040        | 0.947        | 1.074        | 0.999         | 1.008         | 0.987         | P63244       | RACK1     | Receptor of activated protein C kinase 1                 |
| 0.992           | 0.979        | 1.013        | 0.953        | 0.887        | 1.068        |              |              |              | 1.145         | 1.004         | 1.130         | P04626       | ERBB2     | Receptor tyrosine-protein kinase erbB-2                  |
| 0.997           | 1.348        | 1.443        | 1.085        | 0.874        | 0.806        | 0.757        | 1.329        | 0.992        | 1.000         | 0.894         | 0.950         | P21860       | ERBB3     | Receptor tyrosine-protein kinase erbB-3                  |

| Abundance Ratio |              |              |              |              |              |              |              |              |               |               |               | Accession ID | Gene name | Protein Description                                         |
|-----------------|--------------|--------------|--------------|--------------|--------------|--------------|--------------|--------------|---------------|---------------|---------------|--------------|-----------|-------------------------------------------------------------|
| 1 d<br>M1/C1    | 1 d<br>M2/C2 | 1 d<br>M3/C3 | 4 d<br>M1/C1 | 4 d<br>M2/C2 | 4 d<br>M3/C3 | 7 d<br>M1/C1 | 7 d<br>M2/C2 | 7 d<br>M3/C3 | 10 d<br>M1/C1 | 10 d<br>M2/C2 | 10 d<br>M3/C3 |              |           |                                                             |
| 0.988           | 0.992        | 0.998        | 0.998        | 0.972        | 0.997        | 1.031        | 1.024        | 0.984        | 1.011         | 0.980         | 1.024         | Q13546       | RIPK1     | Receptor-interacting serine/threonine-protein kinase 1      |
| 0.995           | 0.981        | 1.063        | 1.008        | 0.954        | 1.002        | 0.983        | 1.017        | 1.014        | 0.955         | 0.982         | 1.028         | O43353       | RIPK2     | Receptor-interacting serine/threonine-protein kinase 2      |
| 1.180           | 1.139        | 1.039        | 1.051        | 1.010        | 1.022        | 1.031        | 1.095        | 1.032        | 1.025         | 0.922         | 1.008         | P57078       | RIPK4     | Receptor-interacting serine/threonine-protein kinase 4      |
| 1.014           | 0.973        | 1.009        | 1.022        | 0.906        | 1.041        | 1.033        | 1.058        | 1.030        | 1.072         | 1.048         | 1.019         | P18433       | PTPRA     | Receptor-type tyrosine-protein phosphatase alpha            |
| 0.900           | 1.072        | 0.918        | 1.334        | 1.418        | 1.453        | 1.520        | 1.148        | 0.881        | 0.959         | 1.031         | 1.090         | P23469       | PTPRE     | Receptor-type tyrosine-protein phosphatase epsilon          |
| 0.970           | 0.998        | 1.051        | 1.019        | 0.945        | 1.016        | 1.037        | 1.104        | 1.021        | 1.068         | 0.974         | 1.112         | A0A087WVC6   | PTPRJ     | Receptor-type tyrosine-protein phosphatase eta              |
| 0.966           | 0.985        | 0.992        | 0.972        | 0.922        | 0.954        | 0.999        | 1.061        | 1.009        | 1.021         | 0.977         | 1.033         | P10586       | PTPRF     | Receptor-type tyrosine-protein phosphatase F                |
| 0.984           | 1.059        | 1.045        | 0.995        | 0.898        | 1.017        | 0.972        | 1.029        | 1.047        | 1.000         | 1.081         | 1.032         | P23470       | PTPRG     | Receptor-type tyrosine-protein phosphatase gamma            |
| 1.064           | 1.003        | 1.075        | 0.995        | 0.982        | 1.030        | 1.001        | 1.094        | 1.045        | 1.053         | 1.011         | 1.105         | E9PGC5       | PTPRK     | Receptor-type tyrosine-protein phosphatase kappa            |
| 1.099           | 1.041        | 0.991        | 1.032        | 1.015        | 0.958        |              |              |              |               |               |               | Q13332       | PTPRS     | Receptor-type tyrosine-protein phosphatase S                |
| 1.467           | 1.080        | 1.254        |              |              |              | 0.870        | 1.352        | 1.148        |               |               |               | Q92729       | PTPRU     | Receptor-type tyrosine-protein phosphatase U                |
| 1.045           | 1.019        | 1.012        | 0.975        | 0.946        | 0.915        | 0.975        | 1.010        | 0.920        | 0.997         | 0.985         | 1.037         | Q06330       | RBPJ      | Recombining binding protein suppressor of hairless          |
| 0.991           | 0.987        | 1.018        | 1.001        | 0.977        | 1.019        | 1.023        | 1.056        | 1.001        | 1.027         | 0.967         | 0.975         | Q9BRX8       | FAM213A   | Redox-regulatory protein FAM213A                            |
| 1.017           | 1.003        | 0.953        | 1.017        | 1.011        | 1.102        | 1.083        | 1.139        | 1.084        | 0.995         | 0.993         | 1.013         | Q8N5W9       | RFLNB     | Refilin-B                                                   |
| 0.986           | 0.996        | 1.009        | 0.977        | 0.973        | 1.068        | 0.994        | 1.036        | 1.041        | 1.073         | 0.975         | 1.095         | Q96P16       | RPRD1A    | Regulation of nuclear pre-mRNA domain-containing protein 1A |
| 1.065           | 1.000        | 0.991        | 1.004        | 0.973        | 0.989        | 0.993        | 1.076        | 1.015        | 0.982         | 1.006         | 0.961         | Q9NQG5       | RPRD1B    | Regulation of nuclear pre-mRNA domain-containing protein 1B |
| 1.032           | 1.013        | 1.024        | 1.051        | 0.912        | 0.995        | 1.056        | 1.014        | 1.031        | 1.055         | 0.967         | 1.036         | Q5VT52       | RPRD2     | Regulation of nuclear pre-mRNA domain-containing protein 2  |
|                 |              |              |              |              |              |              |              |              | 1.040         | 1.319         | 0.877         | C9JW69       | RCC1      | Regulator of chromosome condensation (Fragment)             |
| 1.121           | 1.088        | 1.278        |              |              |              |              |              |              |               |               |               | O14924       | RGS12     | Regulator of G-protein signaling 12                         |
|                 |              |              |              |              |              |              |              |              | 0.913         | 0.938         | 1.058         | P49795       | RGS19     | Regulator of G-protein signaling 19                         |
| 1.039           | 1.003        | 0.983        | 1.010        | 1.007        | 0.994        | 1.010        | 1.014        | 0.972        | 1.047         | 0.997         | 0.981         | Q96DB5       | RMDN1     | Regulator of microtubule dynamics protein 1                 |
| 1.099           | 0.969        | 1.127        | 0.938        | 0.858        | 0.990        | 1.007        | 0.996        | 1.016        | 0.973         | 1.005         | 1.032         | Q96LZ7       | RMDN2     | Regulator of microtubule dynamics protein 2                 |
| 0.984           | 0.991        | 1.045        | 1.013        | 0.941        | 1.031        | 1.013        | 1.047        | 0.999        | 1.058         | 0.989         | 1.011         | Q96TC7       | RMDN3     | Regulator of microtubule dynamics protein 3                 |
| 1.014           | 1.021        | 0.998        | 1.023        | 1.017        | 0.980        | 1.014        | 1.066        | 1.034        | 0.973         | 1.009         | 1.001         | Q92900       | UPF1      | Regulator of nonsense transcripts 1                         |
| 1.033           | 1.001        | 1.026        | 1.013        | 0.955        | 1.031        | 0.995        | 1.047        | 1.037        | 1.020         | 0.966         | 1.050         | Q9HAU5       | UPF2      | Regulator of nonsense transcripts 2                         |
|                 |              |              | 0.647        | 0.875        | 0.953        | 1.022        | 0.607        | 0.734        | 1.226         | 1.280         | 1.449         | Q9H1J1       | UPF3A     | Regulator of nonsense transcripts 3A                        |

| Abundance Ratio |              |              |              |              |              |              |              |              |               |               |               | Accession ID | Gene name      | Protein Description                                                               |
|-----------------|--------------|--------------|--------------|--------------|--------------|--------------|--------------|--------------|---------------|---------------|---------------|--------------|----------------|-----------------------------------------------------------------------------------|
| 1 d<br>M1/C1    | 1 d<br>M2/C2 | 1 d<br>M3/C3 | 4 d<br>M1/C1 | 4 d<br>M2/C2 | 4 d<br>M3/C3 | 7 d<br>M1/C1 | 7 d<br>M2/C2 | 7 d<br>M3/C3 | 10 d<br>M1/C1 | 10 d<br>M2/C2 | 10 d<br>M3/C3 |              |                |                                                                                   |
| 0.986           | 1.014        | 1.027        | 1.000        | 0.976        | 1.033        | 1.011        | 1.035        | 0.999        | 1.037         | 0.979         | 1.035         | Q9BZI7       | UPF3B          | Regulator of nonsense transcripts 3B                                              |
| 0.929           | 0.922        | 1.641        |              |              |              | 0.906        | 0.755        | 1.150        |               |               |               | F6WH68       | RTEL1-TNFRSF6B | Regulator of telomere elongation helicase 1                                       |
| 1.038           | 1.077        | 1.029        | 0.952        | 0.975        | 0.930        | 1.059        | 1.071        | 1.033        | 0.852         | 1.099         | 0.996         | O00287       | RFXAP          | Regulatory factor X-associated protein                                            |
| 0.972           | 0.973        | 1.025        | 0.977        | 0.941        | 1.041        | 1.054        | 1.090        | 1.022        | 1.041         | 0.989         | 1.067         | Q8N122       | RPTOR          | Regulatory-associated protein of mTOR                                             |
| 1.038           | 1.007        | 1.001        | 1.000        | 0.958        | 0.998        | 1.015        | 1.003        | 0.974        | 1.009         | 0.982         | 1.034         | Q8WUF5       | PPP1R13L       | RelA-associated inhibitor                                                         |
| 0.814           | 1.101        | 0.925        |              |              |              |              |              |              | 1.677         | 1.167         | 1.623         | Q8TDU9       | RXFP4          | Relaxin-3 receptor 2                                                              |
| 0.937           | 1.035        | 0.955        | 0.771        | 0.839        | 1.046        | 0.983        | 0.439        | 1.033        | 0.922         | 0.924         | 1.146         | Q8IUW5       | RELL1          | RELT-like protein 1                                                               |
| 1.007           | 0.966        | 1.013        | 0.983        | 0.965        | 1.032        | 1.010        | 0.966        | 1.017        | 1.010         | 1.029         | 1.066         | Q96T23       | RSF1           | Remodeling and spacing factor 1                                                   |
|                 |              |              | 0.953        | 0.973        | 0.815        | 0.847        | 1.118        | 0.694        | 0.904         | 0.968         | 0.950         | A0A1B0GTB0   | ATP6AP2        | Renin receptor (Fragment)                                                         |
| 0.960           | 0.989        | 0.966        | 1.023        | 0.908        | 0.997        | 1.010        | 1.083        | 1.020        | 1.094         | 1.072         | 1.050         | O75787       | ATP6AP2        | Renin receptor                                                                    |
| 0.972           | 0.985        | 1.010        | 1.048        | 0.948        | 1.035        | 1.025        | 1.038        | 1.008        | 1.107         | 1.033         | 1.099         | P35251       | RFC1           | Replication factor C subunit 1                                                    |
| 0.989           | 0.990        | 0.992        | 0.998        | 0.967        | 0.982        | 1.014        | 1.089        | 1.018        | 0.958         | 0.973         | 0.999         | P35250       | RFC2           | Replication factor C subunit 2                                                    |
| 1.035           | 1.000        | 1.015        | 0.963        | 0.949        | 0.991        | 1.049        | 0.971        | 1.036        | 0.997         | 0.972         | 1.020         | P40938       | RFC3           | Replication factor C subunit 3                                                    |
| 1.014           | 1.006        | 1.007        | 0.980        | 0.987        | 0.982        | 0.997        | 1.064        | 0.995        | 0.969         | 1.004         | 0.981         | P35249       | RFC4           | Replication factor C subunit 4                                                    |
| 1.018           | 1.006        | 1.009        | 0.984        | 0.982        | 0.967        | 0.991        | 0.978        | 1.041        | 0.966         | 0.968         | 0.981         | P40937       | RFC5           | Replication factor C subunit 5                                                    |
| 1.040           | 1.017        | 1.035        | 0.996        | 1.065        | 0.986        | 1.007        | 1.037        | 1.025        | 0.910         | 1.007         | 0.940         | P35244       | RPA3           | Replication protein A 14 kDa subunit                                              |
| 1.006           | 0.992        | 0.977        | 1.004        | 1.065        | 0.974        | 0.982        | 0.958        | 1.004        | 0.970         | 0.999         | 0.961         | P27694       | RPA1           | Replication protein A 70 kDa DNA-binding subunit                                  |
| 0.999           | 0.993        | 1.062        | 1.370        | 1.491        | 0.960        | 1.032        | 1.012        | 1.045        | 1.140         | 0.881         | 1.127         | E9PSH4       | MAF1           | Repressor of RNA polymerase III transcription MAF1 homolog                        |
| 1.059           | 1.008        | 1.002        | 1.003        | 0.941        | 1.036        | 1.040        | 0.947        | 0.984        | 1.047         | 0.973         | 0.990         | Q9NUL5       | RYDEN          | Repressor of yield of DENV protein                                                |
| 0.987           | 0.974        | 0.992        | 1.019        | 0.886        | 1.036        | 1.008        | 1.046        | 1.049        | 1.008         | 1.058         | 1.004         | Q9NWS8       | RMND1          | Required for meiotic nuclear division protein 1 homolog                           |
| 1.002           | 0.974        | 0.990        | 1.011        | 0.944        | 0.984        | 0.990        | 1.082        | 1.010        | 0.991         | 0.948         | 0.973         | Q9UKL0       | RCOR1          | REST corepressor 1                                                                |
| 1.017           | 1.008        | 0.984        | 0.983        | 0.958        | 0.995        | 0.984        | 1.018        | 0.967        | 0.977         | 0.970         | 0.967         | Q15293       | RCN1           | Reticulocalbin-1                                                                  |
| 1.104           | 0.922        | 0.988        | 0.892        | 0.889        | 1.149        | 1.007        | 0.920        | 0.916        | 0.929         | 0.953         | 1.051         | Q96D15       | RCN3           | Reticulocalbin-3                                                                  |
| 0.938           | 1.003        | 0.982        | 0.990        | 0.939        | 0.981        | 0.998        | 1.074        | 1.021        | 1.074         | 1.017         | 1.045         | O95197       | RTN3           | Reticulon-3                                                                       |
| 1.018           | 1.009        | 0.987        | 0.993        | 0.969        | 1.005        | 1.008        | 1.004        | 0.978        | 1.013         | 0.973         | 1.012         | Q8WWV3       | RTN4IP1        | Reticulon-4-interacting protein 1, mitochondrial                                  |
|                 |              |              | 1.024        | 0.820        | 1.105        |              |              |              |               |               |               | P00352       | ALDH1A1        | Retinal dehydrogenase 1                                                           |
| 1.036           | 0.971        | 1.033        | 0.858        | 0.967        | 1.102        | 1.017        | 0.878        | 1.004        | 0.826         | 1.039         | 1.053         | O94788       | ALDH1A2        | Retinal dehydrogenase 2                                                           |
| 1.081           | 0.922        | 1.059        | 0.973        | 1.095        | 0.980        | 1.012        | 0.988        | 1.079        | 1.001         | 1.002         | 1.044         | O43924       | PDE6D          | Retinal rod rhodopsin-sensitive cGMP 3',5'-cyclic phosphodiesterase subunit delta |
|                 |              |              | 1.013        | 0.856        | 0.892        | 1.061        | 1.139        | 0.640        | 1.032         | 0.932         | 0.781         | Q8TA86       | RP9            | Retinitis pigmentosa 9 protein                                                    |
| 1.011           | 1.016        | 1.009        | 0.976        | 0.900        | 0.989        | 1.029        | 1.095        | 1.032        | 0.954         | 0.977         | 1.073         | P06400       | RB1            | Retinoblastoma-associated protein                                                 |
| 0.989           | 0.993        | 1.000        | 1.002        | 0.952        | 0.992        | 1.026        | 1.008        | 1.000        | 1.043         | 0.968         | 1.060         | Q15291       | RBBP5          | Retinoblastoma-binding protein 5                                                  |



| Abundance Ratio |              |              |              |              |              |              |              |              |               |               |               | Accession ID | Gene name | Protein Description                                    |
|-----------------|--------------|--------------|--------------|--------------|--------------|--------------|--------------|--------------|---------------|---------------|---------------|--------------|-----------|--------------------------------------------------------|
| 1 d<br>M1/C1    | 1 d<br>M2/C2 | 1 d<br>M3/C3 | 4 d<br>M1/C1 | 4 d<br>M2/C2 | 4 d<br>M3/C3 | 7 d<br>M1/C1 | 7 d<br>M2/C2 | 7 d<br>M3/C3 | 10 d<br>M1/C1 | 10 d<br>M2/C2 | 10 d<br>M3/C3 |              |           |                                                        |
| 0.946           | 1.066        | 0.976        | 0.834        | 0.917        | 0.915        | 0.724        | 1.303        | 0.905        |               |               |               | P28749       | RBL1      | Retinoblastoma-like protein 1                          |
| 1.191           | 1.106        | 1.074        | 0.981        | 0.941        | 1.061        | 1.023        | 1.164        | 0.987        | 1.126         | 0.970         | 1.040         | Q08999       | RBL2      | Retinoblastoma-like protein 2                          |
|                 |              |              |              |              |              | 1.071        | 1.075        | 0.903        |               |               |               | A8MUP8       | RARA      | Retinoic acid receptor alpha                           |
| 0.993           | 0.932        | 0.996        | 0.885        | 0.813        | 0.907        | 1.155        | 1.229        | 0.947        | 1.083         | 1.077         | 1.141         | P19793       | RXRA      | Retinoic acid receptor RXR-alpha                       |
| 0.952           | 1.007        | 0.980        | 0.999        | 1.009        | 0.993        | 0.997        | 0.969        | 0.979        | 0.992         | 1.003         | 1.057         | Q7Z5J4       | RAI1      | Retinoic acid-induced protein 1                        |
| 1.014           | 1.006        | 0.989        | 1.042        | 1.023        | 1.033        | 1.071        | 1.154        | 1.076        | 1.147         | 1.142         | 1.072         | Q9HB40       | SCPEP1    | Retinoid-inducible serine carboxypeptidase             |
|                 |              |              |              |              |              |              |              |              | 0.956         | 0.943         | 1.017         | Q8IZV5       | RDH10     | Retinol dehydrogenase 10                               |
|                 |              |              | 0.962        | 0.800        | 1.200        |              |              |              |               |               |               | G3V2G6       | RDH11     | Retinol dehydrogenase 11 (Fragment)                    |
| 0.942           | 0.975        | 0.956        | 0.944        | 0.857        | 0.963        | 0.996        | 1.054        | 0.955        | 1.013         | 1.041         | 1.043         | Q8TC12       | RDH11     | Retinol dehydrogenase 11                               |
| 1.027           | 1.044        | 1.033        | 0.995        | 0.989        | 1.003        | 0.964        | 1.038        | 0.997        | 1.052         | 0.991         | 1.038         | Q8NBN7       | RDH13     | Retinol dehydrogenase 13                               |
| 0.982           | 1.002        | 1.018        | 1.001        | 0.948        | 1.014        | 1.033        | 1.063        | 0.984        | 1.008         | 0.980         | 1.056         | Q9HBH5       | RDH14     | Retinol dehydrogenase 14                               |
| 1.022           | 1.007        | 1.244        | 0.997        | 0.893        | 1.018        | 1.308        | 0.973        | 1.987        |               |               |               | A0A087WX23   | PEG10     | Retrotransposon-derived protein PEG10                  |
| 1.025           | 1.008        | 0.993        | 1.015        | 0.963        | 0.978        | 0.973        | 1.017        | 0.963        | 0.982         | 1.045         | 0.930         | P52565       | ARHGDI A  | Rho GDP-dissociation inhibitor 1                       |
|                 |              |              |              |              |              | 1.021        | 0.815        | 0.828        |               |               |               | P52566       | ARHGDI B  | Rho GDP-dissociation inhibitor 2                       |
| 1.001           | 1.021        | 1.023        | 1.005        | 0.981        | 1.006        | 1.025        | 1.045        | 1.037        | 1.014         | 0.981         | 1.039         | Q07960       | ARHGAP1   | Rho GTPase-activating protein 1                        |
| 0.944           | 0.922        | 1.020        | 1.048        | 0.993        | 1.004        | 1.005        | 0.966        | 1.015        | 0.925         | 0.875         | 0.993         | A1A4S6       | ARHGAP10  | Rho GTPase-activating protein 10                       |
| 1.067           | 1.123        | 1.168        |              |              |              |              |              |              |               |               |               | Q6P4F7       | ARHGAP11A | Rho GTPase-activating protein 11A                      |
| 1.039           | 0.981        | 1.031        | 1.002        | 0.986        | 1.017        | 0.997        | 0.993        | 1.018        | 1.006         | 0.994         | 1.056         | Q68EM7       | ARHGAP17  | Rho GTPase-activating protein 17                       |
| 0.974           | 0.970        | 0.988        | 0.986        | 0.988        | 0.958        | 0.987        | 0.950        | 0.997        | 1.009         | 0.995         | 1.055         | Q8N392       | ARHGAP18  | Rho GTPase-activating protein 18                       |
| 1.072           | 0.981        | 1.021        | 0.996        | 0.948        | 1.012        | 1.031        | 1.119        | 0.970        | 1.021         | 0.991         | 1.094         | Q5T5U3       | ARHGAP21  | Rho GTPase-activating protein 21                       |
| 0.937           | 0.965        | 1.069        | 0.992        | 0.942        | 0.984        | 0.966        | 0.855        | 0.997        | 0.859         | 1.136         | 1.199         | A0A0G2JNY3   | ARHGAP27  | Rho GTPase-activating protein 27                       |
| 0.971           | 0.982        | 0.996        | 1.004        | 0.997        | 0.994        | 1.055        | 1.043        | 1.041        | 1.008         | 0.997         | 1.060         | Q52LW3       | ARHGAP29  | Rho GTPase-activating protein 29                       |
|                 |              |              | 0.911        | 0.958        | 1.011        |              |              |              |               |               |               | A7KAX9       | ARHGAP32  | Rho GTPase-activating protein 32                       |
| 1.033           | 1.005        | 1.005        | 1.040        | 0.972        | 1.040        | 1.026        | 1.086        | 0.990        | 1.035         | 0.956         | 1.038         | Q9NRY4       | ARHGAP35  | Rho GTPase-activating protein 35                       |
| 0.956           | 1.014        | 0.941        | 1.015        | 0.946        | 1.030        | 1.081        | 1.205        | 1.128        | 0.987         | 0.904         | 1.285         | Q5TG30       | ARHGAP40  | Rho GTPase-activating protein 40                       |
| 1.028           | 0.961        | 1.018        | 1.005        | 0.992        | 1.058        | 1.027        | 1.043        | 1.016        | 1.006         | 1.007         | 1.048         | Q92619       | ARHGAP45  | Rho GTPase-activating protein 45                       |
| 1.020           | 1.016        | 1.011        | 0.987        | 0.970        | 1.015        | 0.963        | 1.039        | 1.018        | 0.995         | 0.986         | 1.051         | Q13017       | ARHGAP5   | Rho GTPase-activating protein 5                        |
| 1.159           | 1.091        | 1.114        | 1.040        | 0.956        | 1.013        | 1.022        | 1.077        | 1.088        | 1.051         | 1.132         | 0.997         | Q96QB1       | DLC1      | Rho GTPase-activating protein 7                        |
| 1.092           | 1.126        | 0.962        | 1.010        | 0.918        | 1.038        | 0.987        | 1.169        | 1.032        | 1.023         | 0.937         | 0.993         | Q6ZW31       | SYDE1     | Rho GTPase-activating protein SYDE1                    |
| 0.990           | 0.997        | 1.006        | 1.009        | 0.938        | 1.015        | 1.032        | 1.023        | 1.014        | 1.006         | 0.946         | 1.055         | M0QZR4       | ARHGEF1   | Rho guanine nucleotide exchange factor 1               |
| 0.980           | 0.969        | 1.011        | 0.996        | 0.957        | 1.049        | 1.010        | 1.039        | 1.070        | 0.976         | 0.914         | 0.961         | O15013       | ARHGEF10  | Rho guanine nucleotide exchange factor 10              |
| 1.125           | 1.096        | 1.013        | 0.990        | 0.962        | 1.149        | 1.087        | 1.017        | 1.046        | 0.933         | 0.847         | 1.136         | Q9HCE6       | ARHGEF10L | Rho guanine nucleotide exchange factor 10-like protein |
| 1.007           | 0.998        | 1.018        | 0.996        | 1.028        | 0.999        | 1.018        | 1.017        | 1.018        | 1.068         | 0.994         | 1.077         | Q9NZN5       | ARHGEF12  | Rho guanine nucleotide exchange factor 12              |

| Abundance Ratio |              |              |              |              |              |              |              |              |               |               |               | Accession ID | Gene name | Protein Description                             |
|-----------------|--------------|--------------|--------------|--------------|--------------|--------------|--------------|--------------|---------------|---------------|---------------|--------------|-----------|-------------------------------------------------|
| 1 d<br>M1/C1    | 1 d<br>M2/C2 | 1 d<br>M3/C3 | 4 d<br>M1/C1 | 4 d<br>M2/C2 | 4 d<br>M3/C3 | 7 d<br>M1/C1 | 7 d<br>M2/C2 | 7 d<br>M3/C3 | 10 d<br>M1/C1 | 10 d<br>M2/C2 | 10 d<br>M3/C3 |              |           |                                                 |
| 0.983           | 0.976        | 0.993        | 1.014        | 0.962        | 1.016        | 0.978        | 1.043        | 1.008        | 0.979         | 0.936         | 1.044         | Q5VV41       | ARHGEF16  | Rho guanine nucleotide exchange factor 16       |
| 0.903           | 1.075        | 1.005        | 1.015        | 0.892        | 1.039        | 1.072        | 0.515        | 1.144        | 0.933         | 1.002         | 0.995         | Q96PE2       | ARHGEF17  | Rho guanine nucleotide exchange factor 17       |
| 1.007           | 1.004        | 0.995        | 0.931        | 0.889        | 0.981        | 0.983        | 1.084        | 1.080        | 0.938         | 0.978         | 1.049         | Q6ZSZ5       | ARHGEF18  | Rho guanine nucleotide exchange factor 18       |
| 1.026           | 0.975        | 1.024        | 1.018        | 0.972        | 1.055        | 1.011        | 0.995        | 1.000        | 0.986         | 0.954         | 1.033         | V9GYM8       | ARHGEF2   | Rho guanine nucleotide exchange factor 2        |
|                 |              |              | 1.133        | 0.901        | 0.975        | 0.901        | 1.301        | 1.069        | 1.054         | 0.762         | 1.223         | E7EV07       | ARHGEF4   | Rho guanine nucleotide exchange factor 4        |
| 1.071           | 0.976        | 1.030        | 0.989        | 1.050        | 0.981        | 1.010        | 1.121        | 1.051        | 0.979         | 0.946         | 1.061         | Q8TER5       | ARHGEF40  | Rho guanine nucleotide exchange factor 40       |
| 1.029           | 0.994        | 1.008        | 0.984        | 0.960        | 1.018        | 0.991        | 0.953        | 0.988        | 1.035         | 0.979         | 1.086         | Q12774       | ARHGEF5   | Rho guanine nucleotide exchange factor 5        |
| 0.982           | 0.997        | 1.031        | 1.019        | 0.989        | 1.048        | 1.024        | 0.962        | 1.022        | 1.055         | 0.997         | 1.069         | Q13464       | ROCK1     | Rho-associated protein kinase 1                 |
| 1.016           | 1.009        | 1.011        | 0.996        | 0.966        | 1.000        | 1.002        | 0.944        | 1.001        | 1.021         | 0.983         | 1.079         | O75116       | ROCK2     | Rho-associated protein kinase 2                 |
| 1.001           | 0.864        | 1.061        | 1.075        | 0.936        | 1.003        | 0.929        | 1.065        | 1.063        | 1.022         | 0.883         | 1.092         | Q8TEB9       | RHBDD1    | Rhomboid-related protein 4                      |
| 0.991           | 1.014        | 1.001        | 0.966        | 0.931        | 0.993        | 1.024        | 1.042        | 0.977        | 1.003         | 0.960         | 1.000         | Q8IUC4       | RHPN2     | Rhopilin-2                                      |
|                 |              |              | 0.920        | 1.009        | 1.179        |              |              |              |               |               |               | O94955       | RHOBTB3   | Rho-related BTB domain-containing protein 3     |
| 1.053           | 1.183        | 1.149        | 1.036        | 0.964        | 1.048        | 1.043        | 0.946        | 1.104        | 1.065         | 1.169         | 1.050         | P62745       | RHOB      | Rho-related GTP-binding protein RhoB            |
| 1.179           | 0.987        | 1.075        | 1.080        | 1.437        | 0.961        | 1.072        | 0.908        | 1.054        | 0.935         | 1.020         | 0.914         | P08134       | RHOC      | Rho-related GTP-binding protein RhoC            |
| 0.970           | 0.961        | 0.971        | 1.290        | 1.033        | 0.958        |              |              |              | 0.923         | 1.072         | 0.952         | P61587       | RND3      | Rho-related GTP-binding protein RhoE            |
| 0.969           | 1.048        | 1.041        | 0.997        | 0.853        | 1.038        | 1.058        | 1.161        | 1.012        | 1.038         | 1.034         | 1.027         | Q9H8H0       | RHOF      | Rho-related GTP-binding protein RhoF            |
| 1.010           | 0.993        | 1.002        | 1.039        | 1.064        | 0.998        | 1.054        | 0.909        | 1.033        | 1.061         | 1.016         | 0.996         | P84095       | RHOG      | Rho-related GTP-binding protein RhoG            |
| 0.795           | 1.062        | 1.343        | 1.086        | 0.960        | 1.122        | 1.110        | 1.018        | 1.052        | 1.053         | 0.934         | 1.081         | P17081       | RHOQ      | Rho-related GTP-binding protein RhoQ            |
| 0.968           | 0.974        | 1.033        | 0.996        | 1.003        | 1.010        | 1.020        | 1.126        | 1.071        | 1.016         | 1.098         | 1.016         | Q969G6       | RFK       | Riboflavin kinase                               |
| 1.002           | 0.975        | 1.009        | 0.971        | 1.061        | 1.018        | 1.062        | 0.975        | 0.989        | 1.092         | 1.023         | 1.099         | Q9H477       | RBKS      | Ribokinase                                      |
| 0.944           | 1.048        | 1.029        | 0.932        | 0.925        | 0.882        | 0.916        | 0.884        | 1.147        | 0.984         | 0.966         | 1.027         | Q9NRR4       | DROSHA    | Ribonuclease 3                                  |
| 1.121           | 0.892        | 1.075        | 0.919        | 0.825        | 1.205        | 1.063        | 1.169        | 1.040        |               |               |               | O60930       | RNASEH1   | Ribonuclease H1                                 |
| 1.056           | 1.016        | 1.049        | 0.954        | 0.966        | 1.017        | 1.031        | 1.083        | 0.992        | 1.004         | 1.030         | 1.048         | O75792       | RNASEH2A  | Ribonuclease H2 subunit A                       |
| 1.036           | 1.032        | 0.987        | 0.968        | 0.919        | 0.996        | 1.041        | 1.085        | 1.001        | 0.980         | 1.008         | 1.070         | Q5TBB1       | RNASEH2B  | Ribonuclease H2 subunit B                       |
| 1.166           | 0.934        | 0.994        | 1.016        | 0.917        | 1.046        | 1.277        | 0.922        | 1.005        | 0.953         | 0.904         | 1.076         | E9PN81       | RNASEH2C  | Ribonuclease H2 subunit C                       |
|                 |              |              |              |              |              |              |              |              | 1.488         | 1.530         | 1.907         | HOYCR7       | RNH1      | Ribonuclease inhibitor (Fragment)               |
| 1.042           | 0.976        | 1.020        | 1.017        | 1.203        | 1.014        | 1.124        | 0.870        | 1.079        | 1.004         | 0.969         | 0.996         | P13489       | RNH1      | Ribonuclease inhibitor                          |
| 1.051           | 1.077        | 1.157        | 1.032        | 0.933        | 1.051        | 0.953        | 1.197        | 0.978        | 0.956         | 0.927         | 1.115         | O95059       | RPP14     | Ribonuclease P protein subunit p14              |
| 1.030           | 1.042        | 1.067        | 1.040        | 1.005        | 0.918        | 1.009        | 1.017        | 0.977        | 1.005         | 1.023         | 0.974         | O75817       | POP7      | Ribonuclease P protein subunit p20              |
|                 |              |              | 0.885        | 1.109        | 1.001        | 0.894        | 0.852        | 0.868        | 0.819         | 1.066         | 1.000         | A0A0G2JIT5   | RPP21     | Ribonuclease P protein subunit p21              |
| 1.053           | 0.990        | 0.953        | 0.988        | 0.931        | 1.046        | 0.967        | 1.059        | 1.003        | 0.902         | 1.007         | 1.012         | Q9BUL9       | RPP25     | Ribonuclease P protein subunit p25              |
| 1.025           | 0.998        | 1.091        | 0.988        | 1.052        | 1.138        | 0.972        | 1.018        | 1.093        | 1.032         | 0.980         | 0.942         | Q8N5L8       | RPP25L    | Ribonuclease P protein subunit p25-like protein |
| 0.959           | 1.001        | 1.025        | 0.978        | 1.030        | 1.022        | 0.951        | 0.980        | 0.979        | 0.961         | 0.989         | 1.156         | O95707       | POP4      | Ribonuclease P protein subunit p29              |
| 1.048           | 1.006        | 1.058        | 1.022        | 1.014        | 0.978        | 1.001        | 1.068        | 0.979        | 1.103         | 1.023         | 1.057         | P78345       | RPP38     | Ribonuclease P protein subunit p38              |

| Abundance Ratio |              |              |              |              |              |              |              |              |               |               |               | Accession ID | Gene name | Protein Description                                |
|-----------------|--------------|--------------|--------------|--------------|--------------|--------------|--------------|--------------|---------------|---------------|---------------|--------------|-----------|----------------------------------------------------|
| 1 d<br>M1/C1    | 1 d<br>M2/C2 | 1 d<br>M3/C3 | 4 d<br>M1/C1 | 4 d<br>M2/C2 | 4 d<br>M3/C3 | 7 d<br>M1/C1 | 7 d<br>M2/C2 | 7 d<br>M3/C3 | 10 d<br>M1/C1 | 10 d<br>M2/C2 | 10 d<br>M3/C3 |              |           |                                                    |
| 1.010           | 0.982        | 0.998        | 0.961        | 0.945        | 1.047        | 0.956        | 1.126        | 0.991        | 0.978         | 0.993         | 1.010         | O75818       | RPP40     | Ribonuclease P protein subunit p40                 |
| 1.324           | 1.141        | 0.867        | 1.018        | 0.997        | 1.166        | 1.005        | 1.210        | 1.008        | 0.888         | 0.890         | 1.122         | Q969H6       | POP5      | Ribonuclease P/MRP protein subunit POP5            |
| 1.017           | 0.957        | 0.948        | 0.996        | 0.998        | 1.021        | 1.078        | 1.107        | 0.992        | 1.081         | 0.963         | 1.097         | A0A087WZM2   | RNASET2   | Ribonuclease T2                                    |
| 0.958           | 1.050        | 1.008        | 0.976        | 0.958        | 1.009        | 0.951        | 1.011        | 1.036        | 0.994         | 0.994         | 1.007         | P52758       | HRSP12    | Ribonuclease UK114                                 |
| 0.993           | 0.996        | 1.008        | 0.988        | 0.991        | 0.998        | 0.963        | 1.063        | 0.984        | 0.977         | 0.997         | 1.017         | Q99575       | POP1      | Ribonucleases P/MRP protein subunit POP1           |
| 1.031           | 1.012        | 1.021        | 1.030        | 0.998        | 1.022        | 1.019        | 1.058        | 1.051        | 1.011         | 1.017         | 1.036         | E9PAU2       | RAVER1    | Ribonucleoprotein PTB-binding 1                    |
| 1.068           | 0.948        | 1.011        | 0.931        | 0.904        | 0.937        | 0.818        | 0.759        | 1.008        | 0.913         | 0.977         | 0.959         | Q9HCJ3       | RAVER2    | Ribonucleoprotein PTB-binding 2                    |
| 0.987           | 0.979        | 1.022        | 1.052        | 1.007        | 0.990        | 1.080        | 1.006        | 0.856        | 0.947         | 0.956         | 1.057         | P23921       | RRM1      | Ribonucleoside-diphosphate reductase large subunit |
| 1.011           | 1.079        | 1.014        | 0.999        | 0.992        | 1.034        | 0.988        | 1.029        | 1.006        | 0.974         | 0.990         | 1.004         | P49247       | RPIA      | Ribose-5-phosphate isomerase                       |
|                 |              |              | 1.038        | 0.900        | 0.936        |              |              |              |               |               |               | B1ALA9       | PRPS1     | Ribose-phosphate pyrophosphokinase 1               |
| 0.920           | 0.976        | 0.983        | 0.976        | 1.045        | 1.012        | 1.002        | 0.974        | 1.006        | 0.940         | 0.979         | 1.006         | P60891       | PRPS1     | Ribose-phosphate pyrophosphokinase 1               |
| 1.011           | 0.980        | 0.995        | 0.980        | 1.055        | 1.023        | 0.986        | 1.020        | 1.064        | 0.954         | 0.932         | 0.994         | P11908       | PRPS2     | Ribose-phosphate pyrophosphokinase 2               |
| 1.006           | 0.993        | 1.030        | 0.989        | 0.987        | 1.002        | 1.002        | 0.928        | 1.022        | 1.004         | 0.987         | 1.054         | Q9Y4W2       | LAS1L     | Ribosomal biogenesis protein LAS1L                 |
| 0.984           | 0.998        | 0.984        | 0.984        | 1.071        | 1.015        | 0.957        | 0.936        | 0.995        | 1.016         | 1.056         | 1.012         | O76021       | RSL1D1    | Ribosomal L1 domain-containing protein 1           |
| 1.048           | 1.023        | 0.971        | 0.957        | 0.933        | 1.017        | 1.046        | 1.031        | 1.017        | 1.112         | 1.039         | 1.100         | Q9H6W3       | RIOX1     | Ribosomal oxygenase 1                              |
| 1.020           | 0.986        | 0.950        | 1.000        | 0.923        | 0.972        | 1.024        | 1.105        | 0.983        | 1.029         | 1.018         | 0.987         | Q8IUF8       | RIOX2     | Ribosomal oxygenase 2                              |
| 1.000           | 1.005        | 1.009        | 0.950        | 0.945        | 1.054        | 0.964        | 1.038        | 0.968        | 1.028         | 0.983         | 1.059         | Q9BQC6       | MRPL57    | Ribosomal protein 63, mitochondrial                |
| 0.966           | 1.013        | 0.998        | 1.036        | 0.958        | 0.990        | 1.019        | 1.045        | 1.002        | 0.998         | 0.967         | 1.052         | P51812       | RPS6KA3   | Ribosomal protein S6 kinase alpha-3                |
| 1.012           | 0.977        | 1.043        | 1.003        | 0.983        | 1.010        | 1.009        | 0.972        | 0.996        | 0.997         | 0.961         | 0.999         | O75676       | RPS6KA4   | Ribosomal protein S6 kinase alpha-4                |
| 1.049           | 0.995        | 0.969        | 0.975        | 1.012        | 1.019        | 0.977        | 1.053        | 0.967        | 0.924         | 0.971         | 0.899         | O75582       | RPS6KA5   | Ribosomal protein S6 kinase alpha-5                |
| 1.084           | 0.963        | 1.039        | 1.056        | 0.924        | 0.967        | 1.024        | 1.068        | 1.034        | 1.067         | 1.005         | 1.062         | P23443       | RPS6KB1   | Ribosomal protein S6 kinase beta-1                 |
| 1.030           | 1.106        | 1.018        | 1.119        | 0.998        | 1.152        | 1.057        | 1.082        | 1.030        | 1.052         | 1.064         | 1.116         | Q9UBS0       | RPS6KB2   | Ribosomal protein S6 kinase beta-2                 |
|                 |              |              |              |              |              |              |              |              | 0.940         | 0.866         | 1.145         | Q96S38       | RPS6KC1   | Ribosomal protein S6 kinase delta-1                |
| 0.988           | 0.948        | 1.029        | 0.965        | 0.970        | 1.049        | 1.005        | 0.958        | 1.001        | 1.019         | 0.989         | 1.049         | P56182       | RRP1      | Ribosomal RNA processing protein 1 homolog A       |
| 0.977           | 1.006        | 1.028        | 0.998        | 0.952        | 1.002        | 0.995        | 1.035        | 0.965        | 0.976         | 1.009         | 1.053         | Q14684       | RRP1B     | Ribosomal RNA processing protein 1 homolog B       |
| 0.894           | 0.938        | 1.062        | 0.931        | 1.077        | 1.054        | 0.959        | 0.556        | 1.015        | 0.974         | 1.046         | 0.992         | Q96EU6       | RRP36     | Ribosomal RNA processing protein 36 homolog        |
| 1.054           | 1.007        | 1.015        | 1.014        | 1.009        | 1.038        | 0.987        | 1.092        | 1.023        | 0.941         | 0.997         | 0.956         | Q92979       | EMG1      | Ribosomal RNA small subunit methyltransferase NEP1 |
| 1.010           | 1.026        | 1.024        | 1.019        | 1.158        | 1.024        | 1.037        | 1.012        | 1.041        | 0.992         | 1.029         | 1.114         | Q9Y3A4       | RRP7A     | Ribosomal RNA-processing protein 7 homolog A       |
| 1.030           | 1.012        | 1.000        | 1.014        | 0.973        | 1.083        | 1.049        | 1.119        | 0.976        | 1.000         | 1.028         | 1.066         | O43159       | RRP8      | Ribosomal RNA-processing protein 8                 |
| 1.004           | 0.996        | 1.001        | 0.984        | 0.939        | 0.986        | 1.010        | 1.021        | 0.984        | 1.000         | 1.019         | 1.039         | Q14692       | BMS1      | Ribosome biogenesis protein BMS1 homolog           |
| 0.981           | 0.994        | 1.001        | 0.985        | 0.951        | 1.009        | 0.991        | 1.000        | 0.997        | 0.993         | 1.008         | 1.027         | Q14137       | BOP1      | Ribosome biogenesis protein BOP1                   |
| 1.013           | 1.006        | 1.024        | 1.026        | 1.051        | 1.022        | 0.996        | 1.036        | 1.035        | 0.975         | 1.034         | 0.976         | Q8TDN6       | BRX1      | Ribosome biogenesis protein BRX1 homolog           |
| 1.025           | 1.009        | 1.009        | 1.067        | 0.967        | 1.013        | 1.006        | 1.064        | 0.993        | 0.970         | 1.028         | 0.972         | O95478       | NSA2      | Ribosome biogenesis protein NSA2 homolog           |

| Abundance Ratio |              |              |              |              |              |              |              |              |               |               |               | Accession ID | Gene name | Protein Description                                         |
|-----------------|--------------|--------------|--------------|--------------|--------------|--------------|--------------|--------------|---------------|---------------|---------------|--------------|-----------|-------------------------------------------------------------|
| 1 d<br>M1/C1    | 1 d<br>M2/C2 | 1 d<br>M3/C3 | 4 d<br>M1/C1 | 4 d<br>M2/C2 | 4 d<br>M3/C3 | 7 d<br>M1/C1 | 7 d<br>M2/C2 | 7 d<br>M3/C3 | 10 d<br>M1/C1 | 10 d<br>M2/C2 | 10 d<br>M3/C3 |              |           |                                                             |
| 1.032           | 1.019        | 1.074        | 0.975        | 1.001        | 0.964        | 1.032        | 0.921        | 1.021        | 1.042         | 1.084         | 1.119         | Q9UJK0       | TSR3      | Ribosome biogenesis protein TSR3 homolog                    |
| 1.019           | 0.979        | 1.021        | 1.006        | 1.062        | 1.028        | 0.990        | 0.981        | 1.017        | 0.956         | 1.018         | 1.012         | Q9GZL7       | WDR12     | Ribosome biogenesis protein WDR12                           |
| 0.967           | 0.979        | 0.994        | 0.951        | 0.969        | 1.048        | 0.968        | 0.898        | 1.035        | 1.010         | 1.027         | 1.028         | Q15050       | RRS1      | Ribosome biogenesis regulatory protein homolog              |
| 1.043           | 1.010        | 0.998        | 1.006        | 1.053        | 1.011        | 1.004        | 0.964        | 1.019        | 1.024         | 0.982         | 1.003         | A0A087X020   | SBDS      | Ribosome maturation protein SBDS                            |
| 1.024           | 0.948        | 1.035        | 0.942        | 0.968        | 1.008        | 0.934        | 1.004        | 1.035        | 1.021         | 0.958         | 0.929         | Q9H9Y2       | RPF1      | Ribosome production factor 1                                |
| 1.052           | 0.984        | 1.011        | 0.987        | 1.004        | 0.996        | 0.942        | 0.921        | 0.941        | 0.990         | 1.059         | 0.968         | Q9H7B2       | RPF2      | Ribosome production factor 2 homolog                        |
| 0.926           | 0.966        | 1.029        | 0.938        | 0.981        | 1.027        | 0.933        | 0.769        | 0.950        | 1.044         | 0.998         | 1.063         | Q9P2E9       | RRBP1     | Ribosome-binding protein 1                                  |
| 1.009           | 0.986        | 1.008        | 0.983        | 0.954        | 0.986        | 1.034        | 0.957        | 0.977        | 1.052         | 0.983         | 1.054         | Q96E11       | MRRF      | Ribosome-recycling factor, mitochondrial                    |
| 1.007           | 0.996        | 1.068        | 0.979        | 0.985        | 0.983        | 1.041        | 1.026        | 1.018        | 0.985         | 0.954         | 1.038         | Q969S9       | GFM2      | Ribosome-releasing factor 2, mitochondrial                  |
| 0.930           | 0.997        | 1.148        | 1.021        | 0.968        | 1.061        | 0.943        | 1.068        | 1.049        | 1.015         | 1.048         | 1.053         | P16083       | NQO2      | Ribosylidihydronicotinamide dehydrogenase [quinone]         |
| 1.060           | 0.967        | 0.996        | 0.990        | 0.992        | 0.985        | 1.004        | 0.928        | 1.092        | 0.975         | 1.032         | 0.997         | Q96AT9       | RPE       | Ribulose-phosphate 3-epimerase                              |
| 0.968           | 0.959        | 1.042        | 0.958        | 0.975        | 1.100        | 1.023        | 1.018        | 1.037        | 1.024         | 0.978         | 1.046         | Q5EBL4       | RILPL1    | RILP-like protein 1                                         |
| 0.956           | 0.750        | 0.803        | 0.808        | 1.004        | 1.157        | 1.130        | 0.754        | 0.819        |               |               |               | Q969X0       | RILPL2    | RILP-like protein 2                                         |
|                 |              |              | 0.930        | 0.798        | 1.150        | 1.052        | 0.860        | 0.977        | 0.869         | 1.123         | 1.632         | A6NJZ7       | RIMBP3C   | RIMS-binding protein 3C                                     |
|                 |              |              |              |              |              |              |              |              | 1.060         | 1.041         | 1.043         | Q96PM5       | RCHY1     | RING finger and CHY zinc finger domain-containing protein 1 |
| 1.021           | 1.005        | 0.961        | 0.982        | 0.875        | 0.986        | 1.083        | 0.948        | 1.106        | 1.012         | 0.929         | 0.944         | Q96DX4       | RSPRY1    | RING finger and SPRY domain-containing protein 1            |
| 0.922           | 0.924        | 0.937        | 1.151        | 1.087        | 1.192        | 0.984        | 0.990        | 1.082        |               |               |               | Q9Y3C5       | RNF11     | RING finger protein 11                                      |
| 0.960           | 1.010        | 0.947        | 1.041        | 1.158        | 1.082        | 1.048        | 0.947        | 1.029        | 1.048         | 0.988         | 1.038         | O15541       | RNF113A   | RING finger protein 113A                                    |
| 1.045           | 1.201        | 0.930        | 0.877        | 1.032        | 1.149        | 1.134        | 0.933        | 0.861        | 0.942         | 1.077         | 1.027         | Q96A37       | RNF166    | RING finger protein 166                                     |
| 0.983           | 0.986        | 0.986        | 0.905        | 0.790        | 1.250        | 0.958        | 0.957        | 1.005        | 0.917         | 1.036         | 0.889         | Q9BXT8       | RNF17     | RING finger protein 17                                      |
|                 |              |              |              |              |              |              |              |              | 1.243         | 1.103         | 1.030         | Q8N4F7       | RNF175    | RING finger protein 175                                     |
| 0.982           | 0.987        | 1.017        | 0.995        | 0.993        | 1.005        | 1.024        | 0.957        | 0.983        | 1.048         | 1.040         | 1.066         | Q8ND24       | RNF214    | RING finger protein 214                                     |
| 1.163           | 0.856        | 1.093        | 0.889        | 1.079        | 0.963        | 0.858        | 0.838        | 1.225        | 0.988         | 1.103         | 1.129         | Q5W0B1       | RNF219    | RING finger protein 219                                     |
| 1.057           | 0.906        | 1.067        |              |              |              |              |              |              | 0.889         | 1.024         | 0.822         | O94941       | UBOX5     | RING finger protein 37                                      |
| 1.041           | 0.983        | 1.040        | 1.035        | 0.970        | 1.022        | 1.028        | 0.999        | 0.951        | 1.094         | 1.025         | 1.089         | Q9C0B0       | UNK       | RING finger protein unkempt homolog                         |
| 1.023           | 0.997        | 1.007        | 1.004        | 0.949        | 1.040        | 0.991        | 0.952        | 1.009        | 1.005         | 1.115         | 1.073         | Q8N488       | RYBP      | RING1 and YY1-binding protein                               |
|                 |              |              |              |              |              | 1.088        | 0.806        | 1.024        | 1.025         | 0.977         | 1.031         | Q9UBF6       | RNF7      | RING-box protein 2                                          |
| 1.084           | 0.989        | 1.051        | 1.056        | 0.917        | 0.972        | 1.015        | 0.981        | 0.995        | 0.970         | 1.022         | 1.311         | Q15633       | TARBP2    | RISC-loading complex subunit TARBP2                         |
| 0.979           | 0.986        | 1.044        | 0.983        | 0.980        | 1.000        | 0.987        | 1.058        | 1.001        | 1.007         | 0.992         | 0.949         | Q9Y2P8       | RCL1      | RNA 3'-terminal phosphate cyclase-like protein              |
| 0.993           | 1.002        | 0.994        | 0.990        | 1.011        | 1.014        | 1.018        | 0.942        | 1.018        | 1.054         | 1.060         | 1.065         | A0A0A0MR66   | RBM10     | RNA binding motif protein 10, isoform CRA_d                 |
| 1.002           | 0.986        | 0.999        | 0.983        | 1.011        | 1.061        | 0.953        | 0.975        | 1.035        | 0.973         | 1.021         | 0.970         | J3KPD3       | RBM7      | RNA binding motif protein 7, isoform CRA_c                  |
| 1.040           | 1.042        | 1.035        | 1.002        | 1.042        | 1.027        | 0.994        | 0.874        | 1.110        | 0.990         | 0.986         | 1.013         | Q96E39       | RBMXL1    | RNA binding motif protein, X-linked-like-1                  |

| Abundance Ratio |              |              |              |              |              |              |              |              |               |               |               | Accession ID | Gene name | Protein Description                                             |
|-----------------|--------------|--------------|--------------|--------------|--------------|--------------|--------------|--------------|---------------|---------------|---------------|--------------|-----------|-----------------------------------------------------------------|
| 1 d<br>M1/C1    | 1 d<br>M2/C2 | 1 d<br>M3/C3 | 4 d<br>M1/C1 | 4 d<br>M2/C2 | 4 d<br>M3/C3 | 7 d<br>M1/C1 | 7 d<br>M2/C2 | 7 d<br>M3/C3 | 10 d<br>M1/C1 | 10 d<br>M2/C2 | 10 d<br>M3/C3 |              |           |                                                                 |
| 0.996           | 0.994        | 1.010        | 1.008        | 1.017        | 1.029        | 1.008        | 1.030        | 0.998        | 0.964         | 1.012         | 0.968         | Q9H0A0       | NAT10     | RNA cytidine acetyltransferase                                  |
| 1.090           | 1.030        | 1.004        | 1.289        | 0.854        | 1.032        | 1.092        | 1.064        | 1.129        | 1.015         | 1.008         | 1.019         | Q8N1G1       | REXO1     | RNA exonuclease 1 homolog                                       |
| 1.008           | 1.051        | 1.000        | 0.977        | 0.965        | 1.041        | 0.982        | 1.076        | 1.039        | 1.000         | 1.068         | 0.993         | Q9GZR2       | REXO4     | RNA exonuclease 4                                               |
| 1.115           | 1.128        | 1.052        | 1.048        | 0.950        | 0.937        | 1.052        | 1.015        | 0.990        | 1.164         | 1.067         | 1.097         | P55199       | ELL       | RNA polymerase II elongation factor ELL                         |
| 1.009           | 1.009        | 1.045        | 0.998        | 0.973        | 1.050        | 1.022        | 0.966        | 1.025        | 1.050         | 1.032         | 1.075         | Q9Y5B0       | CTDP1     | RNA polymerase II subunit A C-terminal domain phosphatase       |
| 1.075           | 0.974        | 1.007        | 1.044        | 1.084        | 0.920        | 1.043        | 1.091        | 1.037        | 0.997         | 1.017         | 1.001         | Q9NP77       | SSU72     | RNA polymerase II subunit A C-terminal domain phosphatase SSU72 |
| 0.982           | 0.993        | 1.002        | 0.967        | 0.940        | 1.007        | 0.994        | 1.025        | 0.974        | 0.971         | 1.011         | 1.043         | Q8N7H5       | PAF1      | RNA polymerase II-associated factor 1 homolog                   |
| 0.853           | 0.937        | 1.026        | 1.039        | 1.011        | 1.060        | 1.030        | 1.141        | 0.995        | 0.945         | 0.983         | 0.820         | Q9BWH6       | RPAP1     | RNA polymerase II-associated protein 1                          |
| 0.987           | 0.984        | 1.014        | 0.957        | 0.962        | 0.987        | 0.987        | 0.995        | 0.995        | 1.015         | 0.980         | 1.043         | Q9H6T3       | RPAP3     | RNA polymerase II-associated protein 3                          |
| 1.134           | 1.001        | 1.070        | 0.984        | 0.949        | 1.090        | 1.007        | 1.198        | 1.015        | 0.896         | 0.979         | 1.130         | Q9NYV6       | RRN3      | RNA polymerase I-specific transcription initiation factor RRN3  |
| 1.032           | 1.006        | 0.971        | 1.007        | 0.963        | 0.986        | 1.039        | 1.130        | 1.004        | 1.008         | 0.986         | 1.053         | Q6PD62       | CTR9      | RNA polymerase-associated protein CTR9 homolog                  |
| 1.006           | 1.019        | 0.965        | 0.943        | 0.955        | 0.955        | 0.955        | 1.041        | 0.979        | 0.951         | 1.067         | 0.990         | Q8WVC0       | LEO1      | RNA polymerase-associated protein LEO1                          |
| 1.012           | 0.997        | 1.021        | 1.011        | 1.009        | 1.028        | 1.036        | 1.046        | 0.990        | 0.993         | 1.024         | 1.024         | Q92541       | RTF1      | RNA polymerase-associated protein RTF1 homolog                  |
| 1.130           | 0.968        | 1.219        | 0.940        | 1.008        | 1.038        | 1.013        | 0.737        | 1.058        | 1.444         | 0.938         | 1.042         | Q9UJJ7       | RPUSD1    | RNA pseudouridylate synthase domain-containing protein 1        |
| 1.114           | 1.047        | 1.045        | 0.976        | 0.893        | 1.042        | 1.121        | 0.962        | 0.993        | 1.129         | 1.004         | 1.128         | Q8IZ73       | RPUSD2    | RNA pseudouridylate synthase domain-containing protein 2        |
| 0.966           | 0.940        | 1.032        | 0.997        | 0.927        | 1.026        | 0.981        | 1.049        | 1.003        | 0.993         | 0.981         | 1.067         | Q6P087       | RPUSD3    | RNA pseudouridylate synthase domain-containing protein 3        |
| 1.036           | 1.073        | 0.908        | 1.120        | 1.012        | 1.021        | 1.148        | 0.971        | 0.940        | 1.235         | 0.994         | 1.039         | Q96CM3       | RPUSD4    | RNA pseudouridylate synthase domain-containing protein 4        |
| 1.014           | 1.062        | 1.061        | 1.030        | 0.980        | 1.070        | 1.129        | 1.107        | 1.004        | 0.981         | 1.061         | 1.141         | O75319       | DUSP11    | RNA/RNP complex-1-interacting phosphatase                       |
| 0.865           | 0.954        | 0.881        | 0.838        | 0.990        | 1.058        | 1.075        | 0.948        | 0.998        | 1.293         | 0.786         | 1.205         | Q5U5Q3       | MEX3C     | RNA-binding E3 ubiquitin-protein ligase MEX3C                   |
| 1.022           | 0.993        | 1.015        | 0.955        | 0.974        | 1.001        | 0.943        | 0.856        | 0.989        | 1.002         | 1.031         | 0.990         | P38159       | RBMX      | RNA-binding motif protein, X chromosome                         |
| 1.012           | 0.996        | 1.038        | 0.980        | 0.840        | 1.008        | 0.995        | 1.090        | 1.052        | 0.938         | 0.916         | 1.183         | Q9Y388       | RBMX2     | RNA-binding motif protein, X-linked 2                           |
| 0.958           | 0.968        | 1.025        | 0.938        | 1.022        | 0.958        | 0.943        | 0.798        | 0.960        | 0.983         | 1.000         | 1.016         | P29558       | RBMS1     | RNA-binding motif, single-stranded-interacting protein 1        |
| 0.951           | 1.001        | 0.984        | 0.990        | 1.172        | 0.997        | 1.061        | 0.941        | 0.999        | 1.046         | 1.003         | 1.003         | Q15434       | RBMS2     | RNA-binding motif, single-stranded-interacting protein 2        |
| 1.000           | 0.995        | 0.971        | 0.998        | 0.958        | 1.035        | 1.001        | 1.070        | 0.998        | 0.977         | 1.000         | 0.995         | Q9NTZ6       | RBM12     | RNA-binding protein 12                                          |
| 1.020           | 0.999        | 1.035        | 1.001        | 0.956        | 1.055        | 0.991        | 0.981        | 1.005        | 1.045         | 1.023         | 1.042         | Q8IXT5       | RBM12B    | RNA-binding protein 12B                                         |
| 1.007           | 1.029        | 0.980        | 1.023        | 0.988        | 0.968        | 1.053        | 1.004        | 0.966        | 1.038         | 1.019         | 0.969         | Q96PK6       | RBM14     | RNA-binding protein 14                                          |
| 0.973           | 0.993        | 0.999        | 0.963        | 0.961        | 1.002        | 0.990        | 0.896        | 0.975        | 1.020         | 0.995         | 1.017         | P49756       | RBM25     | RNA-binding protein 25                                          |

| Abundance Ratio |              |              |              |              |              |              |              |              |               |               |               | Accession ID | Gene name | Protein Description                           |
|-----------------|--------------|--------------|--------------|--------------|--------------|--------------|--------------|--------------|---------------|---------------|---------------|--------------|-----------|-----------------------------------------------|
| 1 d<br>M1/C1    | 1 d<br>M2/C2 | 1 d<br>M3/C3 | 4 d<br>M1/C1 | 4 d<br>M2/C2 | 4 d<br>M3/C3 | 7 d<br>M1/C1 | 7 d<br>M2/C2 | 7 d<br>M3/C3 | 10 d<br>M1/C1 | 10 d<br>M2/C2 | 10 d<br>M3/C3 |              |           |                                               |
| 1.034           | 1.004        | 1.035        | 0.991        | 0.983        | 1.029        | 0.993        | 1.006        | 0.976        | 1.006         | 1.001         | 1.033         | Q5T8P6       | RBM26     | RNA-binding protein 26                        |
| 1.028           | 1.003        | 1.004        | 0.970        | 0.952        | 1.017        | 0.944        | 0.927        | 0.978        | 0.979         | 1.043         | 1.029         | Q9P2N5       | RBM27     | RNA-binding protein 27                        |
| 1.014           | 0.993        | 1.014        | 0.996        | 0.977        | 1.040        | 0.986        | 1.049        | 1.023        | 1.009         | 1.042         | 1.027         | Q9NW13       | RBM28     | RNA-binding protein 28                        |
| 1.123           | 1.038        | 0.995        | 1.049        | 1.063        | 0.909        | 1.067        | 0.842        | 0.922        | 1.174         | 1.099         | 0.976         | P98179       | RBM3      | RNA-binding protein 3                         |
| 1.057           | 1.025        | 1.048        | 0.972        | 0.913        | 0.996        | 1.018        | 0.997        | 1.005        | 0.986         | 1.031         | 1.045         | Q96EV2       | RBM33     | RNA-binding protein 33                        |
| 1.011           | 1.006        | 1.025        | 1.027        | 0.984        | 1.001        | 1.016        | 1.086        | 1.024        | 1.032         | 1.061         | 1.022         | P42696       | RBM34     | RNA-binding protein 34                        |
| 1.021           | 1.000        | 0.939        |              |              |              | 1.067        | 0.906        | 1.043        |               |               |               | Q9H0Z9       | RBM38     | RNA-binding protein 38                        |
| 1.040           | 0.975        | 0.990        | 1.010        | 1.035        | 0.999        | 1.051        | 0.975        | 0.998        | 1.044         | 1.021         | 1.016         | Q9BWF3       | RBM4      | RNA-binding protein 4                         |
|                 |              |              | 1.005        | 0.883        | 0.998        | 1.076        | 1.053        | 0.989        |               |               |               | Q96LT9       | RNPC3     | RNA-binding protein 40                        |
|                 |              |              | 1.067        | 0.931        | 0.850        | 0.892        | 0.997        | 1.015        |               |               |               | Q96IZ5       | RBM41     | RNA-binding protein 41                        |
| 1.069           | 1.024        | 1.037        | 1.015        | 0.974        | 1.011        | 0.983        | 1.098        | 1.013        | 0.973         | 1.005         | 0.973         | Q9BTD8       | RBM42     | RNA-binding protein 42                        |
| 0.953           | 0.851        | 0.853        |              |              |              |              |              |              |               |               |               | Q6ZSC3       | RBM43     | RNA-binding protein 43                        |
| 0.970           | 1.037        | 0.982        | 1.026        | 0.946        | 1.060        | 0.985        | 1.097        | 1.038        | 0.907         | 1.094         | 0.905         | Q8IUH3       | RBM45     | RNA-binding protein 45                        |
| 0.969           | 0.931        | 1.406        | 1.019        | 0.725        | 1.320        | 0.809        | 0.827        | 1.344        | 0.797         | 0.928         | 1.025         | Q9BQ04       | RBM4B     | RNA-binding protein 4B                        |
| 1.079           | 1.021        | 1.019        | 1.075        | 1.011        | 1.104        | 1.149        | 1.154        | 1.084        | 1.059         | 1.021         | 1.163         | P52756       | RBM5      | RNA-binding protein 5                         |
| 1.020           | 0.978        | 1.050        | 0.989        | 0.992        | 1.056        | 1.012        | 0.846        | 1.038        | 1.003         | 1.015         | 1.104         | P78332       | RBM6      | RNA-binding protein 6                         |
| 1.075           | 0.986        | 0.981        | 0.976        | 0.971        | 0.989        | 1.012        | 1.031        | 0.964        | 1.001         | 1.027         | 1.014         | Q9Y5S9       | RBM8A     | RNA-binding protein 8A                        |
|                 |              |              |              |              |              |              |              |              | 0.925         | 1.074         | 0.894         | H7BY36       | EWSR1     | RNA-binding protein EWS (Fragment)            |
| 0.893           | 1.032        | 0.902        | 1.023        | 1.012        | 0.912        | 1.039        | 0.998        | 0.943        | 1.078         | 1.048         | 1.027         | H3BPE7       | FUS       | RNA-binding protein FUS                       |
| 1.044           | 1.017        | 1.008        | 0.995        | 1.012        | 1.002        | 1.033        | 1.032        | 1.030        | 0.988         | 1.013         | 0.992         | Q96DH6       | MSI2      | RNA-binding protein Musashi homolog 2         |
| 1.012           | 0.978        | 1.000        | 1.060        | 1.011        | 1.012        | 1.035        | 0.960        | 1.028        | 1.047         | 1.042         | 1.095         | Q9ULX3       | NOB1      | RNA-binding protein NOB1                      |
| 0.996           | 0.937        | 0.948        | 0.969        | 0.945        | 0.987        | 0.999        | 1.003        | 0.971        | 0.989         | 0.964         | 0.986         | Q9UNW9       | NOVA2     | RNA-binding protein Nova-2                    |
| 0.995           | 0.981        | 1.011        | 1.007        | 0.978        | 1.060        | 1.045        | 1.031        | 1.055        | 1.041         | 1.082         | 1.067         | Q9NRX1       | PNO1      | RNA-binding protein PNO1                      |
| 0.996           | 0.988        | 0.966        | 0.975        | 0.963        | 0.979        | 0.980        | 0.981        | 0.968        | 1.007         | 1.013         | 1.000         | Q9UKM9       | RALY      | RNA-binding protein Raly                      |
| 0.981           | 1.020        | 0.957        | 1.012        | 0.979        | 1.000        | 1.039        | 1.079        | 0.989        | 0.998         | 1.025         | 0.987         | Q15287       | RNPS1     | RNA-binding protein with serine-rich domain 1 |
| 1.054           | 1.022        | 1.004        | 1.002        | 0.911        | 0.996        | 0.964        | 0.965        | 0.961        | 1.041         | 0.918         | 1.066         | Q9BTL3       | FAM103A1  | RNMT-activating mini protein                  |
| 0.988           | 0.988        | 1.025        | 0.991        | 0.932        | 1.055        | 1.025        | 0.953        | 0.994        | 1.075         | 1.022         | 1.072         | Q5TZA2       | CROCC     | Rootletin                                     |
| 1.052           | 1.124        | 1.068        | 0.949        | 0.903        | 0.933        | 0.942        | 0.830        | 1.075        | 1.076         | 1.133         | 1.132         | Q5TC82       | RC3H1     | Roquin-1                                      |
| 1.044           | 0.926        | 1.064        | 0.836        | 0.826        | 1.008        | 0.911        | 0.983        | 1.003        | 0.992         | 0.998         | 1.003         | Q5VWQ0       | RSBN1     | Round spermatid basic protein 1               |
| 0.995           | 1.017        | 0.953        | 1.013        | 0.956        | 1.050        | 1.068        | 0.997        | 0.989        | 1.035         | 0.957         | 1.158         | Q6PCB5       | RSBN1L    | Round spermatid basic protein 1-like protein  |
|                 |              |              |              |              |              |              |              |              | 1.038         | 1.059         | 0.870         | Q96MS0       | ROBO3     | Roundabout homolog 3                          |
| 0.893           | 0.993        | 1.055        | 0.928        | 0.902        | 1.047        | 0.993        | 1.226        | 1.066        | 0.980         | 0.981         | 1.039         | A0A0A0MSE7   | RPAIN     | RPA-interacting protein                       |
| 1.089           | 1.022        | 1.015        | 1.008        | 0.986        | 0.991        | 0.986        | 1.015        | 0.990        | 0.970         | 1.009         | 0.934         | P22087       | FBL       | rRNA 2'-O-methyltransferase fibrillarin       |
| 1.033           | 0.961        | 0.983        | 0.979        | 1.032        | 0.985        | 1.068        | 0.944        | 1.000        | 1.072         | 0.995         | 1.034         | Q6IN84       | MRM1      | rRNA methyltransferase 1, mitochondrial       |

| Abundance Ratio |              |              |              |              |              |              |              |              |               |               |               | Accession ID | Gene name | Protein Description                                                         |
|-----------------|--------------|--------------|--------------|--------------|--------------|--------------|--------------|--------------|---------------|---------------|---------------|--------------|-----------|-----------------------------------------------------------------------------|
| 1 d<br>M1/C1    | 1 d<br>M2/C2 | 1 d<br>M3/C3 | 4 d<br>M1/C1 | 4 d<br>M2/C2 | 4 d<br>M3/C3 | 7 d<br>M1/C1 | 7 d<br>M2/C2 | 7 d<br>M3/C3 | 10 d<br>M1/C1 | 10 d<br>M2/C2 | 10 d<br>M3/C3 |              |           |                                                                             |
| 1.249           | 0.933        | 1.027        | 0.945        | 0.856        | 1.086        | 1.258        | 0.946        | 0.959        | 1.158         | 1.085         | 1.144         | Q9UI43       | MRM2      | rRNA methyltransferase 2, mitochondrial                                     |
| 0.903           | 0.972        | 1.023        | 0.910        | 0.943        | 1.038        | 0.943        | 0.958        | 1.030        | 1.021         | 0.983         | 1.060         | Q9HC36       | MRM3      | rRNA methyltransferase 3, mitochondrial                                     |
| 1.038           | 1.098        | 1.114        | 0.939        | 0.769        | 0.945        | 0.954        | 1.195        | 0.951        | 0.926         | 1.132         | 0.973         | A6NHQ2       | FBLL1     | rRNA/tRNA 2'-O-methyltransferase fibrillarin-like protein 1                 |
|                 |              |              | 0.986        | 1.174        | 1.024        | 1.167        | 0.803        | 1.261        | 1.130         | 0.972         | 1.020         | Q9Y324       | FCF1      | rRNA-processing protein FCF1 homolog                                        |
| 1.073           | 1.051        | 0.993        | 1.056        | 1.048        | 1.128        | 0.988        | 0.936        | 1.152        | 1.133         | 0.878         | 1.047         | Q9BRU9       | UTP23     | rRNA-processing protein UTP23 homolog                                       |
| 1.008           | 0.988        | 1.011        | 1.015        | 0.979        | 1.026        | 1.009        | 1.091        | 0.992        | 0.999         | 1.047         | 1.009         | Q5JTH9       | RRP12     | RRP12-like protein                                                          |
| 1.081           | 1.015        | 1.021        | 1.006        | 0.985        | 1.017        | 0.984        | 1.055        | 0.980        | 0.980         | 1.038         | 0.989         | Q9Y3B9       | RRP15     | RRP15-like protein                                                          |
| 0.975           | 0.994        | 1.022        | 0.978        | 0.959        | 1.037        | 1.005        | 0.958        | 1.041        | 1.011         | 0.964         | 1.061         | Q96T51       | RUFY1     | RUN and FYVE domain-containing protein 1                                    |
| 1.023           | 0.985        | 1.043        | 1.001        | 0.911        | 1.023        | 1.018        | 1.044        | 1.039        | 0.997         | 0.969         | 1.029         | Q8WXA3       | RUFY2     | RUN and FYVE domain-containing protein 2                                    |
|                 |              |              |              |              |              | 1.080        | 1.252        | 0.914        | 1.106         | 0.971         | 0.976         | Q9BVN2       | RUSC1     | RUN and SH3 domain-containing protein 1                                     |
| 0.942           | 1.121        | 0.835        | 0.906        | 0.908        | 0.929        | 1.063        | 1.064        | 0.913        | 0.989         | 1.036         | 1.020         | Q92622       | RUBCN     | Run domain Beclin-1-interacting and cysteine-rich domain-containing protein |
|                 |              |              | 0.786        | 0.887        | 1.194        | 1.740        | 1.447        | 1.196        | 0.934         | 0.999         | 1.463         | Q96C34       | RUNDC1    | RUN domain-containing protein 1                                             |
| 0.964           | 0.990        | 1.063        | 0.958        | 0.917        | 1.035        | 1.025        | 1.028        | 1.032        | 1.020         | 1.028         | 1.032         | Q96GQ5       | C16orf58  | RUS1 family protein C16orf58                                                |
| 0.989           | 0.985        | 0.984        | 0.974        | 0.985        | 0.978        | 0.942        | 0.987        | 0.995        | 0.967         | 0.993         | 0.977         | Q9Y265       | RUVBL1    | RuvB-like 1                                                                 |
| 0.997           | 0.995        | 0.987        | 0.998        | 0.990        | 0.999        | 0.994        | 1.004        | 0.991        | 0.977         | 0.999         | 0.950         | Q9Y230       | RUVBL2    | RuvB-like 2                                                                 |
| 1.008           | 0.960        | 0.975        | 0.957        | 0.931        | 0.988        | 0.957        | 1.020        | 0.985        | 0.993         | 0.951         | 1.007         | Q9H446       | RWDD1     | RWD domain-containing protein 1                                             |
| 1.079           | 1.186        | 1.125        |              |              |              |              |              |              |               |               |               | P57060       | RWDD2B    | RWD domain-containing protein 2B                                            |
| 1.102           | 0.994        | 0.905        | 0.931        | 0.990        | 1.051        | 0.913        | 1.078        | 0.972        | 0.870         | 0.966         | 0.922         | Q9Y3V2       | RWDD3     | RWD domain-containing protein 3                                             |
| 1.073           | 0.977        | 0.908        | 0.970        | 0.937        | 0.925        | 0.970        | 1.086        | 1.011        | 0.998         | 0.999         | 1.091         | Q6NW29       | RWDD4     | RWD domain-containing protein 4                                             |
| 0.979           | 0.888        | 1.141        | 0.926        | 0.917        | 1.063        | 0.841        | 1.154        | 0.853        | 0.710         | 0.999         | 1.061         | Q9BY12       | SCAPER    | S phase cyclin A-associated protein in the endoplasmic reticulum            |
| 0.986           | 0.992        | 1.043        | 1.008        | 1.008        | 1.034        | 1.037        | 1.044        | 1.034        | 0.999         | 1.003         | 1.085         | Q8N5C6       | SRBD1     | S1 RNA-binding domain-containing protein 1                                  |
| 0.830           | 0.907        | 1.424        | 0.843        | 0.779        | 0.995        |              |              |              |               |               |               | A0A096LPE2   | SAA2-SAA4 | SAA2-SAA4 readthrough                                                       |
|                 |              |              | 2.165        | 0.993        | 0.927        | 3.249        | 0.694        | 1.741        |               |               |               | A6NKF1       | SAC3D1    | SAC3 domain-containing protein 1                                            |
| 1.054           | 1.006        | 0.992        | 1.057        | 0.904        | 0.976        | 1.039        | 1.089        | 0.985        | 1.010         | 1.042         | 0.939         | Q8NBX0       | SCCPDH    | Saccharopine dehydrogenase-like oxidoreductase                              |
| 0.927           | 1.061        | 0.851        | 1.018        | 1.121        | 1.000        | 1.026        | 1.032        | 1.201        | 1.014         | 1.063         | 1.071         | Q9NZJ4       | SACS      | Sacsin                                                                      |
| 0.981           | 1.004        | 0.975        | 1.035        | 1.066        | 1.020        | 1.019        | 0.994        | 1.043        | 1.024         | 1.025         | 1.009         | O43865       | AHCYL1    | S-adenosylhomocysteine hydrolase-like protein 1                             |
| 1.017           | 0.921        | 1.129        | 0.823        | 0.994        | 1.085        | 1.110        | 0.755        | 1.270        |               |               |               | Q9NV66       | TYW1      | S-adenosyl-L-methionine-dependent tRNA 4-demethylwyosine synthase           |
| 1.055           | 0.992        | 1.267        | 1.056        | 1.095        | 1.093        | 1.072        | 1.120        | 1.039        | 0.967         | 1.091         | 1.060         | P17707       | AMD1      | S-adenosylmethionine decarboxylase proenzyme                                |
| 1.043           | 0.992        | 1.076        | 0.987        | 0.847        | 1.049        | 0.848        | 0.873        | 0.971        | 1.133         | 0.948         | 0.987         | F8WAB8       | SLC25A26  | S-adenosylmethionine mitochondrial carrier protein                          |
| 1.034           | 0.994        | 0.998        | 1.006        | 1.038        | 1.020        | 0.985        | 0.998        | 1.025        | 0.984         | 1.023         | 0.973         | P31153       | MAT2A     | S-adenosylmethionine synthase isoform type-2                                |
| 0.984           | 0.981        | 0.994        | 0.991        | 0.958        | 0.961        | 0.946        | 0.841        | 0.934        | 1.023         | 1.033         | 1.022         | Q9NWH9       | SLTM      | SAFB-like transcription modulator                                           |



| Abundance Ratio |              |              |              |              |              |              |              |              |               |               |               | Accession ID | Gene name | Protein Description                                      |
|-----------------|--------------|--------------|--------------|--------------|--------------|--------------|--------------|--------------|---------------|---------------|---------------|--------------|-----------|----------------------------------------------------------|
| 1 d<br>M1/C1    | 1 d<br>M2/C2 | 1 d<br>M3/C3 | 4 d<br>M1/C1 | 4 d<br>M2/C2 | 4 d<br>M3/C3 | 7 d<br>M1/C1 | 7 d<br>M2/C2 | 7 d<br>M3/C3 | 10 d<br>M1/C1 | 10 d<br>M2/C2 | 10 d<br>M3/C3 |              |           |                                                          |
| 0.993           | 1.020        | 0.942        | 0.962        | 0.928        | 0.984        | 0.966        | 1.087        | 1.036        | 0.978         | 0.987         | 1.033         | Q96ES7       | SGF29     | SAGA-associated factor 29                                |
| 0.927           | 0.922        | 0.941        | 0.925        | 0.852        | 0.920        | 0.876        | 0.752        | 1.018        | 0.925         | 0.996         | 1.135         | O94885       | SASH1     | SAM and SH3 domain-containing protein 1                  |
| 1.023           | 1.021        | 0.989        | 1.005        | 0.976        | 1.043        | 0.989        | 1.093        | 1.028        | 1.015         | 1.005         | 1.057         | J3QQJ0       | SAP30BP   | SAP30-binding protein (Fragment)                         |
| 0.965           | 0.981        | 1.011        | 0.992        | 0.921        | 1.000        | 0.964        | 0.858        | 0.975        | 1.030         | 1.016         | 1.118         | Q14BN4       | SLMAP     | Sarcolemmal membrane-associated protein                  |
| 0.919           | 1.009        | 0.980        | 0.998        | 0.976        | 1.011        | 1.028        | 1.017        | 1.013        | 1.057         | 1.053         | 1.006         | P16615       | ATP2A2    | Sarcoplasmic/endoplasmic reticulum calcium ATPase 2      |
| 1.014           | 0.990        | 1.041        | 0.955        | 0.942        | 1.007        | 0.988        | 0.934        | 0.980        | 0.972         | 0.970         | 0.990         | Q14151       | SAFB2     | Scaffold attachment factor B2                            |
| 1.041           | 0.964        | 1.071        | 1.218        | 1.003        | 1.152        | 1.269        | 1.274        | 1.045        | 1.265         | 1.112         | 1.330         | Q8WTV0       | SCARB1    | Scavenger receptor class B member 1                      |
| 0.949           | 0.979        | 0.986        | 1.004        | 0.934        | 0.982        | 1.009        | 1.062        | 1.000        | 0.976         | 0.948         | 1.017         | Q7Z7L1       | SLFN11    | Schlafen family member 11                                |
| 0.968           | 0.994        | 1.018        | 0.994        | 0.994        | 1.035        |              |              |              |               |               |               | Q68D06       | SLFN13    | Schlafen family member 13                                |
| 1.029           | 1.022        | 1.037        | 0.996        | 1.004        | 1.021        | 1.035        | 1.039        | 1.012        | 0.989         | 0.955         | 1.005         | Q08AF3       | SLFN5     | Schlafen family member 5                                 |
|                 |              |              |              |              |              |              |              |              | 1.138         | 1.090         | 1.018         | Q9UJH3       | SFMBT1    | Scm-like with four MBT domains protein 1                 |
| 1.024           | 1.004        | 1.012        | 0.986        | 0.978        | 1.034        | 0.998        | 1.105        | 1.045        | 0.988         | 1.027         | 1.048         | Q6P3W7       | SCYL2     | SCY1-like protein 2                                      |
| 0.984           | 0.995        | 1.022        | 0.967        | 1.025        | 1.028        | 0.971        | 0.980        | 1.017        | 1.016         | 0.993         | 1.014         | Q8WVM8       | SCFD1     | Sec1 family domain-containing protein 1                  |
| 0.997           | 0.978        | 1.053        | 0.964        | 0.946        | 1.009        | 1.002        | 1.006        | 1.119        | 0.937         | 0.975         | 0.993         | Q8WU76       | SCFD2     | Sec1 family domain-containing protein 2                  |
| 1.015           | 1.003        | 1.014        | 0.976        | 0.956        | 0.999        | 0.981        | 1.049        | 0.997        | 0.905         | 1.012         | 0.996         | O76054       | SEC14L2   | SEC14-like protein 2                                     |
| 0.917           | 0.957        | 0.950        | 0.977        | 0.974        | 1.035        | 1.044        | 1.024        | 1.053        | 0.996         | 0.994         | 1.065         | Q9UDX4       | SEC14L3   | SEC14-like protein 3                                     |
| 1.007           | 0.962        | 0.970        | 1.006        | 0.967        | 1.019        | 1.005        | 1.006        | 0.991        | 1.019         | 0.931         | 0.980         | Q9Y6Y8       | SEC23IP   | SEC23-interacting protein                                |
| 0.945           | 0.985        | 1.000        | 0.983        | 0.969        | 1.059        | 1.024        | 0.987        | 1.083        | 1.022         | 1.026         | 1.034         | J3QL71       | SCRN2     | Secernin-2                                               |
| 0.984           | 1.005        | 1.020        | 0.992        | 1.016        | 1.011        | 1.012        | 0.994        | 1.013        | 0.987         | 0.937         | 1.056         | Q0VDG4       | SCRN3     | Secernin-3                                               |
| 0.896           | 1.018        | 1.109        | 0.890        | 0.822        | 1.101        | 0.973        | 0.798        | 1.055        | 1.131         | 0.821         | 1.238         | Q8WVN6       | SECTM1    | Secreted and transmembrane protein 1                     |
|                 |              |              |              |              |              |              |              |              | 0.980         | 1.064         | 1.043         | Q9UGK8       | SERGEF    | Secretion-regulating guanine nucleotide exchange factor  |
|                 |              |              | 0.979        | 0.825        | 0.970        | 1.041        | 1.158        | 0.977        |               |               |               | H3BUB6       | SCAMP2    | Secretory carrier-associated membrane protein (Fragment) |
| 0.960           | 0.986        | 1.000        | 0.992        | 0.955        | 1.027        | 0.980        | 0.999        | 1.005        | 1.094         | 1.056         | 1.075         | O15126       | SCAMP1    | Secretory carrier-associated membrane protein 1          |
| 1.010           | 1.011        | 1.074        | 1.010        | 0.966        | 0.996        | 1.028        | 1.019        | 1.120        | 1.071         | 1.040         | 1.033         | O15127       | SCAMP2    | Secretory carrier-associated membrane protein 2          |
| 0.945           | 0.993        | 0.989        | 0.971        | 0.963        | 1.085        | 1.022        | 0.970        | 1.022        | 1.131         | 1.035         | 1.089         | O14828       | SCAMP3    | Secretory carrier-associated membrane protein 3          |
| 0.947           | 0.978        | 1.028        | 0.961        | 0.923        | 1.052        | 1.005        | 0.961        | 1.018        | 1.061         | 1.051         | 1.075         | Q969E2       | SCAMP4    | Secretory carrier-associated membrane protein 4          |
| 1.082           | 1.007        | 1.091        | 1.020        | 0.973        | 1.009        | 1.091        | 1.038        | 0.961        |               |               |               | Q13018       | PLA2R1    | Secretory phospholipase A2 receptor                      |
| 0.892           | 0.931        | 1.045        |              |              |              |              |              |              |               |               |               | O95997       | PTTG1     | Securin                                                  |
| 1.081           | 1.007        | 1.031        | 1.030        | 0.980        | 0.948        | 0.946        | 1.043        | 1.058        | 1.005         | 1.019         | 1.096         | O14640       | DVL1      | Segment polarity protein dishevelled homolog DVL-1       |
| 0.997           | 0.974        | 1.010        | 0.984        | 1.002        | 1.020        | 0.978        | 0.977        | 1.012        | 1.016         | 1.048         | 1.029         | O14641       | DVL2      | Segment polarity protein dishevelled homolog DVL-2       |

| Abundance Ratio |              |              |              |              |              |              |              |              |               |               |               | Accession ID | Gene name | Protein Description                                      |
|-----------------|--------------|--------------|--------------|--------------|--------------|--------------|--------------|--------------|---------------|---------------|---------------|--------------|-----------|----------------------------------------------------------|
| 1 d<br>M1/C1    | 1 d<br>M2/C2 | 1 d<br>M3/C3 | 4 d<br>M1/C1 | 4 d<br>M2/C2 | 4 d<br>M3/C3 | 7 d<br>M1/C1 | 7 d<br>M2/C2 | 7 d<br>M3/C3 | 10 d<br>M1/C1 | 10 d<br>M2/C2 | 10 d<br>M3/C3 |              |           |                                                          |
| 0.951           | 0.871        | 0.932        | 1.021        | 0.923        | 1.072        | 1.009        | 0.987        | 1.165        | 1.007         | 1.018         | 1.236         | Q92997       | DVL3      | Segment polarity protein dishevelled homolog DVL-3       |
| 0.901           | 0.899        | 0.988        | 0.775        | 0.736        | 0.956        |              |              |              |               |               |               | A0A087WYL5   | SEZ6L2    | Seizure 6-like protein 2                                 |
| 1.009           | 0.991        | 0.984        | 1.003        | 0.958        | 0.972        | 0.984        | 1.080        | 0.975        | 0.972         | 1.004         | 0.963         | P49903       | SEPHS1    | Selenide, water dikinase 1                               |
|                 |              |              | 1.043        | 0.902        | 1.010        | 0.968        | 1.059        | 1.039        | 1.015         | 1.031         | 1.016         | Q99611       | SEPHS2    | Selenide, water dikinase 2                               |
| 0.986           | 1.084        | 0.978        | 0.828        | 0.705        | 1.096        |              |              |              | 0.820         | 1.286         | 1.451         | Q96T21       | SECISBP2  | Selenocysteine insertion sequence-binding protein 2      |
| 0.949           | 0.981        | 1.072        | 0.977        | 0.855        | 1.075        |              |              |              | 0.937         | 1.050         | 1.144         | Q93073       | SECISBP2L | Selenocysteine insertion sequence-binding protein 2-like |
| 0.985           | 1.007        | 0.970        | 1.006        | 1.051        | 1.004        | 0.981        | 1.050        | 1.033        | 0.967         | 1.016         | 1.019         | A0A0A0MQU4   | SCLY      | Selenocysteine lyase                                     |
| 0.938           | 1.007        | 1.027        | 1.029        | 0.994        | 1.009        | 1.057        | 0.914        | 1.007        | 1.122         | 1.028         | 1.182         | P57772       | EEFSEC    | Selenocysteine-specific elongation factor                |
| 1.017           | 0.960        | 0.979        | 0.959        | 0.996        | 1.034        | 0.964        | 1.074        | 1.009        | 1.001         | 0.952         | 1.031         | A0A0B4J1S4   | SELENOF   | Selenoprotein F                                          |
| 1.023           | 0.953        | 1.050        | 0.943        | 0.899        | 1.072        |              |              |              |               |               |               | Q8IZQ5       | SELENOH   | Selenoprotein H                                          |
| 0.989           | 0.926        | 0.914        | 0.935        | 0.710        | 1.239        |              |              |              | 0.999         | 1.105         | 1.034         | Q9Y6D0       | SELENOK   | Selenoprotein K                                          |
| 1.033           | 1.008        | 1.090        | 0.931        | 0.890        | 0.918        | 1.065        | 1.115        | 1.135        |               |               |               | Q8WWX9       | SELENOM   | Selenoprotein M                                          |
| 0.964           | 1.018        | 1.089        | 0.889        | 1.041        | 0.990        |              |              |              |               |               |               | Q9NZV5       | SELENON   | Selenoprotein N                                          |
| 1.065           | 1.009        | 0.996        | 1.058        | 0.922        | 1.034        | 1.009        | 0.960        | 0.969        | 1.112         | 1.004         | 1.064         | Q9BVL4       | SELENOO   | Selenoprotein O                                          |
| 1.059           | 1.054        | 1.059        | 0.996        | 0.953        | 0.949        | 1.026        | 0.762        | 0.923        |               |               |               | E9PN30       | SELENOS   | Selenoprotein S (Fragment)                               |
| 0.973           | 1.161        | 1.064        |              |              |              | 1.134        | 1.168        | 1.110        |               |               |               | A0A087WVA1   | SELENOT   | Selenoprotein T                                          |
| 0.940           | 0.955        | 1.097        | 0.849        | 0.887        | 1.002        | 0.916        | 0.647        | 0.900        |               |               |               | Q14563       | SEMA3A    | Semaphorin-3A                                            |
| 1.008           | 0.976        | 0.997        | 0.938        | 0.852        | 0.973        | 0.974        | 1.007        | 0.979        | 1.078         | 0.939         | 1.025         | Q99985       | SEMA3C    | Semaphorin-3C                                            |
| 1.015           | 1.019        | 1.033        | 1.015        | 0.988        | 1.054        | 1.117        | 1.104        | 0.917        | 0.915         | 1.026         | 0.998         | J3KNP4       | SEMA4B    | Semaphorin-4B                                            |
| 1.035           | 1.070        | 0.965        | 0.982        | 0.915        | 1.126        | 1.078        | 0.921        | 1.049        | 1.137         | 0.969         | 1.108         | Q9C0C4       | SEMA4C    | Semaphorin-4C                                            |
| 1.027           | 0.899        | 0.882        |              |              |              |              |              |              |               |               |               | Q92854       | SEMA4D    | Semaphorin-4D                                            |
| 1.061           | 1.017        | 1.065        | 1.040        | 1.002        | 0.994        | 1.005        | 1.053        | 1.014        | 1.027         | 1.010         | 0.985         | Q9P0U3       | SENP1     | Sentrin-specific protease 1                              |
| 0.970           | 0.887        | 1.124        |              |              |              |              |              |              |               |               |               | Q9HC62       | SENP2     | Sentrin-specific protease 2                              |
| 1.028           | 1.000        | 1.025        | 1.033        | 0.950        | 1.010        | 1.012        | 1.064        | 1.011        | 1.046         | 1.005         | 1.018         | Q9H4L4       | SENP3     | Sentrin-specific protease 3                              |
| 1.026           | 1.112        | 1.195        |              |              |              |              |              |              |               |               |               | Q96HI0       | SENP5     | Sentrin-specific protease 5                              |
| 0.887           | 0.928        | 1.104        | 0.951        | 1.166        | 0.935        | 0.989        | 0.934        | 0.890        | 0.837         | 1.088         | 0.838         | Q9GZR1       | SENP6     | Sentrin-specific protease 6                              |
| 1.056           | 0.983        | 1.214        | 0.829        | 0.950        | 1.167        |              |              |              | 0.865         | 0.944         | 1.033         | Q96LD8       | SENP8     | Sentrin-specific protease 8                              |
| 1.069           | 1.421        | 1.093        |              |              |              |              |              |              |               |               |               | Q14674       | ESPL1     | Separin                                                  |
| 1.023           | 1.003        | 1.021        | 0.988        | 1.067        | 1.014        | 0.973        | 0.999        | 1.044        | 0.967         | 0.976         | 0.988         | P35270       | SPR       | Sepiapterin reductase                                    |
| 0.994           | 0.973        | 0.979        | 0.969        | 0.969        | 0.956        | 0.985        | 1.035        | 1.018        | 0.998         | 1.001         | 1.016         | B5ME97       | 10-Sep    | Septin 10, isoform CRA_c                                 |
|                 |              |              | 0.980        | 0.880        | 1.086        | 1.036        | 1.336        | 1.045        | 1.349         | 0.898         | 0.977         | J3KNL2       | 1-Sep     | Septin-1                                                 |
| 0.827           | 1.026        | 0.957        | 0.984        | 0.909        | 1.093        | 0.996        | 1.119        | 1.033        | 0.948         | 0.924         | 1.015         | C9IY94       | 2-Sep     | Septin-2 (Fragment)                                      |

| Abundance Ratio |              |              |              |              |              |              |              |              |               |               |               | Accession ID | Gene name | Protein Description                                     |
|-----------------|--------------|--------------|--------------|--------------|--------------|--------------|--------------|--------------|---------------|---------------|---------------|--------------|-----------|---------------------------------------------------------|
| 1 d<br>M1/C1    | 1 d<br>M2/C2 | 1 d<br>M3/C3 | 4 d<br>M1/C1 | 4 d<br>M2/C2 | 4 d<br>M3/C3 | 7 d<br>M1/C1 | 7 d<br>M2/C2 | 7 d<br>M3/C3 | 10 d<br>M1/C1 | 10 d<br>M2/C2 | 10 d<br>M3/C3 |              |           |                                                         |
| 1.037           | 1.027        | 1.008        | 1.010        | 0.958        | 0.962        | 1.007        | 1.076        | 1.002        | 0.939         | 1.003         | 1.023         | Q14141       | 6-Sep     | Septin-6                                                |
| 0.740           | 1.089        | 0.856        | 1.055        | 1.026        | 0.988        | 1.063        | 0.889        | 1.102        | 1.091         | 1.249         | 0.805         | Q16181       | 7-Sep     | Septin-7                                                |
| 1.059           | 1.039        | 1.009        | 0.882        | 1.057        | 0.876        | 1.131        | 1.297        | 1.028        | 1.139         | 1.067         | 0.936         | F8W8I8       | 8-Sep     | Septin-8                                                |
| 1.033           | 1.000        | 1.002        | 1.010        | 0.969        | 0.953        | 1.015        | 1.004        | 0.972        | 1.056         | 0.985         | 1.053         | Q92599       | 8-Sep     | Septin-8                                                |
| 0.972           | 0.980        | 0.985        | 0.983        | 0.993        | 0.991        | 0.977        | 0.961        | 0.979        | 0.997         | 1.025         | 1.001         | Q9UHD8       | 9-Sep     | Septin-9                                                |
|                 |              |              |              |              |              |              |              |              | 1.034         | 0.898         | 0.847         | D6RBF1       | SQSTM1    | Sequestosome-1                                          |
| 1.070           | 1.082        | 1.013        | 1.069        | 1.075        | 1.026        | 1.060        | 1.073        | 1.010        | 1.008         | 1.041         | 1.051         | Q13501       | SQSTM1    | Sequestosome-1                                          |
| 1.007           | 0.978        | 0.984        | 0.981        | 1.002        | 0.995        | 0.999        | 1.048        | 1.042        | 0.995         | 0.978         | 1.047         | P83111       | LACTB     | Serine beta-lactamase-like protein LACTB, mitochondrial |
| 1.023           | 0.922        | 1.080        | 0.994        | 0.956        | 0.994        | 1.012        | 1.110        | 1.038        | 1.039         | 1.006         | 1.097         | Q96GA7       | SDSL      | Serine dehydratase-like                                 |
| 1.008           | 1.007        | 0.991        | 1.022        | 1.074        | 0.995        | 1.060        | 1.002        | 1.016        | 1.018         | 0.981         | 0.987         | P34896       | SHMT1     | Serine hydroxymethyltransferase, cytosolic              |
| 0.985           | 0.993        | 0.998        | 1.001        | 1.021        | 0.981        | 0.985        | 0.999        | 0.997        | 0.987         | 0.975         | 0.998         | P34897       | SHMT2     | Serine hydroxymethyltransferase, mitochondrial          |
| 1.004           | 0.996        | 1.107        | 1.001        | 0.914        | 1.173        | 1.050        | 0.928        | 1.158        | 1.112         | 1.103         | 1.190         | Q9NRX5       | SERINC1   | Serine incorporator 1                                   |
| 1.082           | 0.925        | 1.364        |              |              |              |              |              |              | 1.101         | 1.119         | 1.026         | Q13530       | SERINC3   | Serine incorporator 3                                   |
| 0.979           | 0.979        | 1.065        | 1.005        | 0.983        | 1.004        | 1.009        | 0.978        | 1.011        | 1.062         | 1.015         | 1.041         | O15269       | SPTLC1    | Serine palmitoyltransferase 1                           |
| 0.990           | 0.961        | 0.984        | 1.014        | 0.928        | 0.920        | 1.014        | 1.082        | 0.959        | 1.052         | 1.024         | 1.046         | O15270       | SPTLC2    | Serine palmitoyltransferase 2                           |
| 0.967           | 1.016        | 0.951        | 0.983        | 0.910        | 0.945        | 0.906        | 1.083        | 1.214        | 1.063         | 1.012         | 1.013         | O95084       | PRSS23    | Serine protease 23                                      |
|                 |              |              |              |              |              | 0.852        | 1.171        | 0.988        |               |               |               | Q92743       | HTRA1     | Serine protease HTRA1                                   |
| 0.993           | 0.986        | 1.044        | 0.970        | 0.963        | 1.017        | 0.961        | 1.019        | 0.993        | 1.008         | 0.999         | 1.019         | O43464       | HTRA2     | Serine protease HTRA2, mitochondrial                    |
| 0.970           | 1.011        | 0.994        | 0.996        | 1.010        | 1.058        | 1.031        | 0.936        | 1.012        | 1.046         | 0.952         | 1.015         | Q9GZT4       | SRR       | Serine racemase                                         |
| 1.030           | 1.004        | 1.051        | 0.995        | 1.077        | 0.966        | 0.995        | 0.919        | 0.997        | 0.919         | 0.995         | 0.950         | A9Z1X7       | SRRM1     | Serine/arginine repetitive matrix protein 1             |
| 0.993           | 0.988        | 1.005        | 0.985        | 0.956        | 0.978        | 0.959        | 1.001        | 0.996        | 0.988         | 1.030         | 1.015         | Q9UQ35       | SRRM2     | Serine/arginine repetitive matrix protein 2             |
| 0.928           | 1.014        | 1.063        | 0.991        | 0.932        | 1.030        | 0.930        | 0.984        | 1.013        | 0.996         | 0.979         | 1.102         | Q96IZ7       | RSRC1     | Serine/Arginine-related protein 53                      |
| 1.021           | 0.993        | 0.974        | 0.969        | 0.986        | 0.963        | 0.971        | 1.003        | 0.993        | 0.967         | 0.986         | 0.977         | O75494       | SRSF10    | Serine/arginine-rich splicing factor 10                 |
| 1.011           | 0.985        | 0.995        | 0.973        | 0.961        | 1.010        | 0.994        | 1.084        | 1.017        | 1.048         | 1.000         | 1.014         | Q05519       | SRSF11    | Serine/arginine-rich splicing factor 11                 |
| 1.196           | 1.161        | 1.066        |              |              |              | 0.842        | 0.549        | 1.141        | 0.887         | 0.927         | 1.148         | Q8WXF0       | SRSF12    | Serine/arginine-rich splicing factor 12                 |
| 0.952           | 0.968        | 0.907        | 0.959        | 0.922        | 0.968        | 0.981        | 0.901        | 0.921        | 1.057         | 0.965         | 0.962         | Q01130       | SRSF2     | Serine/arginine-rich splicing factor 2                  |
| 1.079           | 1.018        | 0.955        | 1.028        | 1.117        | 0.995        | 1.081        | 0.938        | 1.001        | 1.036         | 1.022         | 1.012         | P84103       | SRSF3     | Serine/arginine-rich splicing factor 3                  |
| 1.054           | 0.979        | 0.999        | 0.977        | 1.029        | 1.018        | 1.015        | 0.933        | 0.973        | 1.025         | 1.011         | 1.002         | Q08170       | SRSF4     | Serine/arginine-rich splicing factor 4                  |
| 1.002           | 0.994        | 0.975        | 1.004        | 0.975        | 1.022        | 0.992        | 1.000        | 0.974        | 1.008         | 1.036         | 0.985         | Q13243       | SRSF5     | Serine/arginine-rich splicing factor 5                  |
| 1.045           | 0.984        | 0.978        | 1.000        | 0.953        | 1.001        | 0.995        | 0.916        | 0.968        | 1.064         | 1.018         | 0.951         | Q13247       | SRSF6     | Serine/arginine-rich splicing factor 6                  |
| 1.034           | 0.997        | 0.993        | 0.999        | 1.057        | 0.978        | 1.033        | 0.906        | 0.975        | 1.013         | 1.007         | 1.002         | Q16629       | SRSF7     | Serine/arginine-rich splicing factor 7                  |
| 1.080           | 1.094        | 0.907        | 1.025        | 0.986        | 1.069        | 0.934        | 0.799        | 0.973        | 0.960         | 0.931         | 1.184         | Q9BRL6       | SRSF8     | Serine/arginine-rich splicing factor 8                  |
| 1.007           | 0.994        | 0.984        | 0.994        | 1.018        | 0.993        | 1.018        | 1.038        | 1.004        | 1.020         | 1.038         | 1.004         | Q13242       | SRSF9     | Serine/arginine-rich splicing factor 9                  |

| Abundance Ratio |              |              |              |              |              |              |              |              |               |               |               | Accession ID | Gene name | Protein Description                                    |
|-----------------|--------------|--------------|--------------|--------------|--------------|--------------|--------------|--------------|---------------|---------------|---------------|--------------|-----------|--------------------------------------------------------|
| 1 d<br>M1/C1    | 1 d<br>M2/C2 | 1 d<br>M3/C3 | 4 d<br>M1/C1 | 4 d<br>M2/C2 | 4 d<br>M3/C3 | 7 d<br>M1/C1 | 7 d<br>M2/C2 | 7 d<br>M3/C3 | 10 d<br>M1/C1 | 10 d<br>M2/C2 | 10 d<br>M3/C3 |              |           |                                                        |
| 1.011           | 0.988        | 0.990        | 0.987        | 1.018        | 0.985        | 0.985        | 0.994        | 1.011        | 0.954         | 1.003         | 0.968         | J3KTL2       | SRSF1     | Serine/arginine-rich-splicing factor 1                 |
| 0.967           | 0.986        | 1.020        | 0.971        | 0.989        | 1.029        | 1.038        | 0.967        | 1.022        | 1.041         | 0.985         | 1.083         | O94804       | STK10     | Serine/threonine-protein kinase 10                     |
| 0.967           | 0.976        | 0.993        | 0.999        | 0.924        | 1.016        | 1.023        | 1.018        | 1.045        | 0.998         | 0.997         | 1.010         | Q8N1F8       | STK11IP   | Serine/threonine-protein kinase 11-interacting protein |
| 0.974           | 1.172        | 1.036        | 0.799        | 0.944        | 1.148        | 0.937        | 1.138        | 1.154        | 0.956         | 1.004         | 1.192         | B8ZZN3       | STK16     | Serine/threonine-protein kinase 16                     |
| 0.933           | 0.988        | 1.058        | 0.746        | 0.996        | 0.756        | 0.768        | 0.961        | 1.198        |               |               |               | O94768       | STK17B    | Serine/threonine-protein kinase 17B                    |
| 0.972           | 0.973        | 1.021        | 0.962        | 0.969        | 1.019        | 1.018        | 1.032        | 1.017        | 1.003         | 0.967         | 1.048         | Q9Y6E0       | STK24     | Serine/threonine-protein kinase 24                     |
| 1.052           | 1.013        | 0.984        | 1.014        | 1.074        | 1.010        | 1.031        | 1.006        | 1.062        | 1.000         | 0.998         | 1.007         | O00506       | STK25     | Serine/threonine-protein kinase 25                     |
| 1.011           | 0.999        | 1.014        | 0.995        | 0.967        | 0.999        | 0.988        | 1.034        | 0.975        | 0.974         | 0.966         | 0.967         | B4E0Y9       | STK26     | Serine/threonine-protein kinase 26                     |
| 1.036           | 0.988        | 1.061        | 0.963        | 0.921        | 1.010        | 0.948        | 0.890        | 1.044        | 0.980         | 1.003         | 0.998         | Q86UX6       | STK32C    | Serine/threonine-protein kinase 32C                    |
| 1.070           | 1.004        | 0.953        | 0.918        | 1.082        | 1.069        | 1.001        | 0.988        | 0.975        | 0.825         | 1.084         | 0.984         | Q8TDR2       | STK35     | Serine/threonine-protein kinase 35                     |
| 0.948           | 0.932        | 0.835        | 0.941        | 0.868        | 1.045        | 1.056        | 1.009        | 1.019        | 1.093         | 1.174         | 1.353         | Q9NRP7       | STK36     | Serine/threonine-protein kinase 36                     |
| 0.962           | 0.997        | 1.001        | 0.984        | 0.994        | 0.994        | 0.988        | 1.002        | 1.010        | 0.971         | 0.966         | 1.040         | Q15208       | STK38     | Serine/threonine-protein kinase 38                     |
| 0.981           | 1.079        | 1.081        | 1.005        | 0.921        | 1.084        | 0.992        | 1.000        | 1.083        | 0.946         | 0.921         | 1.019         | Q9Y2H1       | STK38L    | Serine/threonine-protein kinase 38-like                |
| 1.008           | 0.996        | 0.982        | 1.011        | 0.992        | 1.036        | 1.027        | 1.099        | 1.014        | 1.019         | 1.008         | 1.008         | Q13043       | STK4      | Serine/threonine-protein kinase 4                      |
| 0.981           | 0.999        | 1.023        | 0.976        | 1.072        | 1.025        | 1.023        | 1.044        | 0.993        | 1.484         | 0.846         | 0.832         | Q13535       | ATR       | Serine/threonine-protein kinase ATR                    |
| 0.859           | 1.189        | 1.037        | 0.936        | 0.958        | 0.939        | 0.928        | 1.249        | 0.885        | 0.977         | 1.080         | 0.963         | P15056       | BRAF      | Serine/threonine-protein kinase B-raf                  |
| 0.992           | 1.015        | 1.040        | 0.998        | 0.960        | 1.062        | 0.969        | 1.110        | 0.938        | 0.899         | 0.930         | 1.015         | E7EPP6       | CHEK1     | Serine/threonine-protein kinase Chk1                   |
| 0.945           | 0.987        | 1.005        | 0.990        | 0.969        | 1.001        | 0.961        | 0.987        | 1.029        | 0.972         | 0.852         | 1.040         | Q15139       | PRKD1     | Serine/threonine-protein kinase D1                     |
| 0.838           | 1.032        | 1.117        | 0.922        | 0.975        | 1.197        | 1.214        | 0.951        | 1.136        |               |               |               | O94806       | PRKD3     | Serine/threonine-protein kinase D3                     |
| 1.091           | 1.055        | 1.085        |              |              |              | 1.046        | 0.846        | 1.474        | 1.118         | 1.099         | 1.254         | Q96GX5       | MASTL     | Serine/threonine-protein kinase greatwall              |
| 0.915           | 1.111        | 1.121        | 0.961        | 1.007        | 1.026        | 0.956        | 0.901        | 0.962        | 1.228         | 1.040         | 1.054         | O95835       | LATS1     | Serine/threonine-protein kinase LATS1                  |
|                 |              |              | 0.831        | 1.051        | 1.029        | 1.030        | 0.980        | 0.870        | 1.224         | 0.974         | 1.172         | Q8IWU2       | LMTK2     | Serine/threonine-protein kinase LMTK2                  |
| 1.000           | 1.009        | 0.986        | 0.991        | 0.964        | 1.005        | 0.997        | 1.034        | 1.103        | 1.016         | 1.012         | 1.035         | Q7KZI7       | MARK2     | Serine/threonine-protein kinase MARK2                  |
| 0.999           | 0.973        | 1.022        | 0.997        | 1.009        | 0.998        | 1.008        | 0.995        | 1.029        | 1.034         | 0.974         | 1.047         | Q9Y5S2       | CDC42BPB  | Serine/threonine-protein kinase MRCK beta              |
| 1.004           | 0.991        | 1.026        | 1.004        | 0.975        | 1.038        | 1.006        | 1.042        | 1.022        | 1.013         | 0.988         | 1.026         | P42345       | MTOR      | Serine/threonine-protein kinase mTOR                   |
| 0.980           | 0.995        | 1.009        | 0.993        | 1.000        | 0.995        | 1.004        | 1.027        | 1.024        | 0.992         | 0.980         | 1.045         | Q16513       | PKN2      | Serine/threonine-protein kinase N2                     |
| 0.980           | 1.001        | 0.976        | 0.939        | 1.069        | 1.202        | 1.009        | 1.179        | 1.023        | 0.831         | 0.721         | 0.967         | Q6P5Z2       | PKN3      | Serine/threonine-protein kinase N3                     |
| 0.976           | 0.950        | 0.988        | 1.086        | 0.909        | 1.161        | 1.086        | 0.940        | 1.070        | 1.197         | 0.999         | 1.184         | P51956       | NEK3      | Serine/threonine-protein kinase Nek3                   |
| 1.035           | 1.058        | 0.956        | 1.080        | 0.926        | 1.077        |              |              |              |               |               |               | P51957       | NEK4      | Serine/threonine-protein kinase Nek4                   |
| 1.016           | 0.988        | 0.984        | 1.024        | 0.988        | 1.023        | 1.065        | 1.073        | 1.024        | 1.003         | 0.987         | 1.026         | Q8TDX7       | NEK7      | Serine/threonine-protein kinase Nek7                   |
|                 |              |              | 0.958        | 0.836        | 1.167        | 1.447        | 0.596        | 0.972        |               |               |               | Q86SG6       | NEK8      | Serine/threonine-protein kinase Nek8                   |
| 1.008           | 1.009        | 1.033        | 0.990        | 0.991        | 0.993        | 1.013        | 1.060        | 1.083        | 1.042         | 1.031         | 1.043         | Q8TD19       | NEK9      | Serine/threonine-protein kinase Nek9                   |
| 1.105           | 1.035        | 1.054        | 0.950        | 0.987        | 0.985        | 0.990        | 1.082        | 1.003        | 1.009         | 1.014         | 1.002         | B4DTS2       | PRKD2     | Serine/threonine-protein kinase                        |

| Abundance Ratio |              |              |              |              |              |              |              |              |               |               |               | Accession ID | Gene name | Protein Description                                                               |
|-----------------|--------------|--------------|--------------|--------------|--------------|--------------|--------------|--------------|---------------|---------------|---------------|--------------|-----------|-----------------------------------------------------------------------------------|
| 1 d<br>M1/C1    | 1 d<br>M2/C2 | 1 d<br>M3/C3 | 4 d<br>M1/C1 | 4 d<br>M2/C2 | 4 d<br>M3/C3 | 7 d<br>M1/C1 | 7 d<br>M2/C2 | 7 d<br>M3/C3 | 10 d<br>M1/C1 | 10 d<br>M2/C2 | 10 d<br>M3/C3 |              |           |                                                                                   |
| 1.040           | 0.991        | 1.017        | 0.999        | 1.007        | 0.977        | 0.990        | 1.031        | 1.007        | 0.970         | 0.986         | 1.011         | Q95747       | OXSRI     | Serine/threonine-protein kinase OSR1                                              |
| 0.983           | 1.002        | 0.974        | 1.009        | 0.957        | 0.984        | 1.013        | 1.053        | 0.987        | 1.008         | 1.017         | 0.985         | Q13153       | PAK1      | Serine/threonine-protein kinase PAK 1                                             |
| 0.987           | 1.004        | 0.988        | 1.006        | 0.979        | 0.985        | 1.009        | 1.041        | 1.015        | 0.991         | 1.017         | 0.999         | Q13177       | PAK2      | Serine/threonine-protein kinase PAK 2                                             |
| 0.983           | 0.995        | 1.019        | 1.021        | 0.978        | 1.015        | 1.010        | 1.021        | 0.997        | 1.018         | 1.037         | 1.078         | Q96013       | PAK4      | Serine/threonine-protein kinase PAK 4                                             |
| 2.680           | 2.469        | 2.635        | 1.103        | 0.728        | 1.010        | 1.169        | 1.107        | 1.048        | 1.082         | 1.139         | 1.162         | P53350       | PLK1      | Serine/threonine-protein kinase PLK1                                              |
| 1.014           | 0.985        | 1.004        | 0.988        | 0.977        | 1.008        | 1.019        | 0.996        | 0.986        | 1.031         | 0.989         | 0.999         | Q13523       | PRPF4B    | Serine/threonine-protein kinase PRP4 homolog                                      |
| 0.997           | 1.043        | 0.978        | 0.952        | 1.011        | 1.092        | 1.062        | 1.130        | 1.049        | 0.987         | 0.936         | 1.046         | Q9BRS2       | RIOK1     | Serine/threonine-protein kinase RIO1                                              |
| 1.014           | 0.898        | 1.017        | 1.009        | 1.002        | 0.956        | 1.073        | 1.023        | 0.981        | 1.122         | 1.054         | 1.112         | Q9BVS4       | RIOK2     | Serine/threonine-protein kinase RIO2                                              |
| 0.992           | 1.000        | 1.011        | 1.033        | 0.995        | 1.038        | 1.004        | 1.073        | 1.008        | 1.112         | 1.055         | 1.098         | Q14730       | RIOK3     | Serine/threonine-protein kinase RIO3                                              |
| 1.017           | 0.955        | 1.015        | 1.049        | 1.048        | 1.194        | 1.110        | 1.210        | 0.868        | 0.969         | 0.935         | 1.047         | H0Y4E8       | SIK3      | Serine/threonine-protein kinase SIK3 (Fragment)                                   |
| 1.024           | 0.982        | 1.032        | 0.970        | 0.933        | 1.042        | 0.981        | 1.040        | 1.019        | 0.993         | 0.999         | 1.006         | Q96Q15       | SMG1      | Serine/threonine-protein kinase SMG1                                              |
| 1.019           | 0.970        | 1.049        | 1.010        | 0.899        | 1.109        | 0.922        | 1.138        | 1.136        | 1.020         | 0.912         | 1.034         | Q15831       | STK11     | Serine/threonine-protein kinase STK11                                             |
| 0.944           | 1.000        | 0.975        | 0.974        | 0.975        | 1.048        | 1.010        | 1.010        | 1.039        | 1.047         | 1.070         | 1.150         | Q7L7X3       | TAOK1     | Serine/threonine-protein kinase TAO1                                              |
| 0.982           | 1.009        | 1.029        | 0.888        | 0.959        | 1.150        | 0.854        | 0.976        | 1.041        | 1.361         | 1.152         | 0.777         | Q9UL54       | TAOK2     | Serine/threonine-protein kinase TAO2                                              |
| 1.062           | 0.968        | 1.036        | 1.020        | 0.950        | 1.032        | 0.986        | 0.917        | 0.951        | 1.018         | 1.021         | 1.045         | Q9H2K8       | TAOK3     | Serine/threonine-protein kinase TAO3                                              |
| 0.995           | 0.985        | 1.018        | 1.004        | 0.974        | 1.061        | 1.001        | 1.042        | 1.015        | 0.976         | 1.007         | 1.013         | Q9UHD2       | TBK1      | Serine/threonine-protein kinase TBK1                                              |
| 0.915           | 1.042        | 1.120        | 1.000        | 0.984        | 1.100        | 0.999        | 1.191        | 0.953        | 0.988         | 0.899         | 0.979         | Q75385       | ULK1      | Serine/threonine-protein kinase ULK1                                              |
| 1.045           | 1.008        | 1.067        | 1.092        | 0.955        | 1.013        | 1.065        | 1.041        | 0.983        | 1.077         | 0.973         | 1.038         | Q6PHR2       | ULK3      | Serine/threonine-protein kinase ULK3                                              |
| 1.047           | 0.978        | 1.018        | 1.028        | 0.949        | 1.023        | 1.057        | 1.011        | 1.015        | 0.991         | 1.009         | 1.028         | Q99986       | VRK1      | Serine/threonine-protein kinase VRK1                                              |
| 0.979           | 0.981        |              | 1.040        | 0.936        | 1.012        | 1.051        | 1.087        | 1.014        | 1.156         | 1.053         | 1.089         | Q86Y07       | VRK2      | Serine/threonine-protein kinase VRK2                                              |
|                 |              |              | 1.051        | 0.880        | 1.254        |              |              |              |               |               |               | Q9Y3S1       | WNK2      | Serine/threonine-protein kinase WNK2                                              |
| 1.011           | 1.010        | 0.978        | 0.902        | 0.964        | 0.839        |              |              |              |               |               |               | A0A0U1RRC7   | ERN2      | Serine/threonine-protein kinase/endoribonuclease IRE2                             |
| 1.033           | 1.035        | 1.011        | 0.971        | 0.999        | 1.009        | 0.968        | 0.904        | 0.977        | 1.013         | 1.059         | 0.994         | Q96QC0       | PPP1R10   | Serine/threonine-protein phosphatase 1 regulatory subunit 10                      |
| 1.051           | 0.950        | 1.050        | 0.977        | 1.046        | 0.794        |              |              |              |               |               |               | Q66LE6       | PPP2R2D   | Serine/threonine-protein phosphatase 2A 55 kDa regulatory subunit B delta isoform |
| 1.017           | 0.975        | 0.973        | 0.971        | 0.976        | 1.012        | 1.015        | 0.985        | 0.966        | 1.052         | 0.967         | 0.943         | Q15172       | PPP2R5A   | Serine/threonine-protein phosphatase 2A 56 kDa regulatory subunit alpha isoform   |
| 1.141           | 1.038        | 1.039        | 1.001        | 0.845        | 0.991        | 1.023        | 1.280        | 1.089        | 1.061         | 0.971         | 0.777         | Q15173       | PPP2R5B   | Serine/threonine-protein phosphatase 2A 56 kDa regulatory subunit beta isoform    |
| 0.984           | 0.997        | 0.992        | 0.969        | 0.967        | 0.973        | 0.994        | 1.046        | 1.001        | 0.974         | 0.990         | 0.945         | Q14738       | PPP2R5D   | Serine/threonine-protein phosphatase 2A 56 kDa regulatory subunit delta isoform   |
| 1.120           | 0.937        | 1.072        | 0.976        | 0.916        | 1.019        | 1.009        | 1.057        | 0.996        | 0.959         | 0.965         | 0.909         | Q16537       | PPP2R5E   | Serine/threonine-protein phosphatase 2A 56 kDa regulatory subunit epsilon isoform |
| 0.972           | 1.000        | 1.008        | 0.980        | 1.005        | 0.999        | 0.985        | 1.022        | 1.011        | 0.973         | 0.961         | 0.998         | P30153       | PPP2R1A   | Serine/threonine-protein phosphatase 2A 65 kDa regulatory subunit A alpha isoform |

| Abundance Ratio |              |              |              |              |              |              |              |              |               |               |               | Accession ID | Gene name | Protein Description                                                          |
|-----------------|--------------|--------------|--------------|--------------|--------------|--------------|--------------|--------------|---------------|---------------|---------------|--------------|-----------|------------------------------------------------------------------------------|
| 1 d<br>M1/C1    | 1 d<br>M2/C2 | 1 d<br>M3/C3 | 4 d<br>M1/C1 | 4 d<br>M2/C2 | 4 d<br>M3/C3 | 7 d<br>M1/C1 | 7 d<br>M2/C2 | 7 d<br>M3/C3 | 10 d<br>M1/C1 | 10 d<br>M2/C2 | 10 d<br>M3/C3 |              |           |                                                                              |
| 1.004           | 0.955        | 1.059        | 0.999        | 0.939        | 1.043        | 0.964        | 0.963        | 0.972        | 1.000         | 0.971         | 0.999         | A6PVN8       | PTPA      | Serine/threonine-protein phosphatase 2A activator (Fragment)                 |
| 0.991           | 1.000        | 1.003        | 0.968        | 0.961        | 0.998        | 0.967        | 1.058        | 1.014        | 0.958         | 0.993         | 0.988         | Q15257       | PTPA      | Serine/threonine-protein phosphatase 2A activator                            |
| 1.049           | 0.975        | 0.999        | 1.053        | 1.184        | 1.000        | 1.066        | 0.857        | 1.113        | 1.029         | 0.977         | 0.999         | P67775       | PPP2CA    | Serine/threonine-protein phosphatase 2A catalytic subunit alpha isoform      |
| 0.961           | 0.998        | 1.006        | 1.010        | 1.133        | 0.981        | 1.001        | 0.968        | 1.031        | 0.982         | 0.981         | 0.966         | P62714       | PPP2CB    | Serine/threonine-protein phosphatase 2A catalytic subunit beta isoform       |
| 1.036           | 0.929        | 0.876        | 0.916        | 0.892        | 1.221        |              |              |              | 0.994         | 0.963         | 1.077         | Q06190       | PPP2R3A   | Serine/threonine-protein phosphatase 2A regulatory subunit B'' subunit alpha |
| 1.006           | 1.018        | 0.997        | 1.009        | 0.966        | 1.106        | 1.008        | 1.076        | 1.018        | 0.949         | 0.958         | 0.970         | P60510       | PPP4C     | Serine/threonine-protein phosphatase 4 catalytic subunit                     |
| 1.030           | 1.001        | 1.061        | 1.008        | 0.959        | 1.043        | 1.063        | 0.998        | 0.961        | 0.958         | 0.958         | 1.047         | Q8TF05       | PPP4R1    | Serine/threonine-protein phosphatase 4 regulatory subunit 1                  |
| 0.948           | 0.978        | 1.023        | 0.961        | 0.981        | 1.025        | 0.910        | 0.790        | 0.955        | 0.936         | 0.995         | 0.983         | Q9NY27       | PPP4R2    | Serine/threonine-protein phosphatase 4 regulatory subunit 2                  |
| 1.047           | 1.000        | 1.030        | 1.029        | 0.935        | 1.033        | 1.016        | 1.058        | 1.048        | 1.001         | 0.989         | 1.015         | Q6IN85       | PPP4R3A   | Serine/threonine-protein phosphatase 4 regulatory subunit 3A                 |
| 1.107           | 0.961        | 1.194        | 0.987        | 0.937        | 0.837        |              |              |              | 0.968         | 1.057         | 1.230         | Q6NUP7       | PPP4R4    | Serine/threonine-protein phosphatase 4 regulatory subunit 4                  |
| 0.966           | 0.999        | 0.998        | 1.001        | 1.003        | 1.002        | 1.001        | 0.989        | 1.001        | 0.995         | 1.003         | 1.036         | P53041       | PPP5C     | Serine/threonine-protein phosphatase 5                                       |
| 1.190           | 1.056        | 1.224        | 1.017        | 0.841        | 0.962        |              |              |              |               |               |               | Q8NB46       | ANKRD52   | Serine/threonine-protein phosphatase 6 regulatory ankyrin repeat subunit C   |
| 1.032           | 0.986        | 0.989        | 0.960        | 0.990        | 1.076        | 1.029        | 1.017        | 1.027        | 1.077         | 0.962         | 1.092         | Q9UPN7       | PPP6R1    | Serine/threonine-protein phosphatase 6 regulatory subunit 1                  |
| 1.078           | 1.000        | 1.034        | 1.022        | 1.019        | 1.014        | 1.044        | 1.019        | 1.031        | 1.005         | 0.996         | 1.038         | Q9BRF8       | CPPED1    | Serine/threonine-protein phosphatase CPPED1                                  |
| 0.998           | 0.991        | 1.003        | 0.972        | 0.948        | 1.008        | 1.030        | 1.034        | 1.029        | 1.007         | 1.007         | 1.039         | Q96HS1       | PGAM5     | Serine/threonine-protein phosphatase PGAM5, mitochondrial                    |
| 1.045           | 0.999        | 1.020        | 1.011        | 1.036        | 1.003        | 1.044        | 1.049        | 1.037        | 1.022         | 1.026         | 1.014         | P62136       | PPP1CA    | Serine/threonine-protein phosphatase PP1-alpha catalytic subunit             |
| 1.063           | 1.042        | 1.017        | 1.019        | 1.249        | 0.987        | 1.053        | 0.967        | 1.086        | 0.995         | 0.974         | 0.983         | P62140       | PPP1CB    | Serine/threonine-protein phosphatase PP1-beta catalytic subunit              |
| 1.015           | 0.984        | 1.025        | 0.991        | 0.930        | 1.002        | 0.986        | 1.058        | 1.041        | 0.984         | 0.992         | 1.024         | Q13315       | ATM       | Serine-protein kinase ATM                                                    |
| 1.004           | 0.993        | 1.019        | 1.005        | 1.101        | 0.996        | 0.966        | 0.947        | 1.039        | 0.991         | 0.998         | 0.980         | Q5T5C7       | SARS      | Serine--tRNA ligase, cytoplasmic                                             |
| 1.003           | 1.015        | 1.036        | 0.964        | 0.961        | 1.014        | 0.998        | 0.992        | 1.037        | 1.028         | 1.001         | 1.025         | M0QWZ7       | SARS2     | Serine--tRNA ligase, mitochondrial                                           |
|                 |              |              |              |              |              |              |              |              | 0.977         | 1.071         | 1.214         | Q86SQ7       | SDCCAG8   | Serologically defined colon cancer antigen 8                                 |
|                 |              |              |              |              |              |              |              |              | 1.085         | 1.004         | 1.068         | P29508       | SERPINB3  | Serpin B3                                                                    |
| 0.971           | 0.996        | 0.997        | 1.006        | 1.012        | 0.998        | 0.995        | 1.050        | 1.022        | 1.004         | 1.016         | 0.996         | A0A087X1N8   | SERPINB6  | Serpin B6                                                                    |
| 1.227           | 1.059        | 1.059        | 0.901        | 1.015        | 0.861        | 1.002        | 1.232        | 1.113        | 1.262         | 1.040         | 0.997         | O75635       | SERPINB7  | Serpin B7                                                                    |

| Abundance Ratio |              |              |              |              |              |              |              |              |               |               |               | Accession ID | Gene name | Protein Description                                          |
|-----------------|--------------|--------------|--------------|--------------|--------------|--------------|--------------|--------------|---------------|---------------|---------------|--------------|-----------|--------------------------------------------------------------|
| 1 d<br>M1/C1    | 1 d<br>M2/C2 | 1 d<br>M3/C3 | 4 d<br>M1/C1 | 4 d<br>M2/C2 | 4 d<br>M3/C3 | 7 d<br>M1/C1 | 7 d<br>M2/C2 | 7 d<br>M3/C3 | 10 d<br>M1/C1 | 10 d<br>M2/C2 | 10 d<br>M3/C3 |              |           |                                                              |
| 1.008           | 1.036        | 1.010        | 1.053        | 1.049        | 1.007        | 1.037        | 1.011        | 1.025        | 0.973         | 0.944         | 1.028         | P50452       | SERPINB8  | Serpin B8                                                    |
|                 |              |              |              |              |              |              |              |              | 1.014         | 0.875         | 1.014         | P50453       | SERPINB9  | Serpin B9                                                    |
| 1.001           | 1.003        | 0.977        | 0.971        | 0.983        | 0.954        | 0.979        | 0.997        | 1.001        | 0.998         | 0.976         | 0.997         | P50454       | SERPINH1  | Serpin H1                                                    |
| 1.024           | 1.001        | 1.012        | 1.001        | 1.061        | 0.980        | 1.001        | 0.952        | 1.015        | 1.019         | 1.015         | 1.048         | Q9BXP5       | SRRT      | Serrate RNA effector molecule homolog                        |
| 1.183           | 1.101        | 1.087        | 1.246        | 1.170        | 1.353        | 1.307        | 1.158        | 1.227        | 1.213         | 1.076         | 1.125         | P0DJ18       | SAA1      | Serum amyloid A-1 protein                                    |
|                 |              |              | 0.973        | 0.734        | 0.975        |              |              |              |               |               |               | P0DJ19       | SAA2      | Serum amyloid A-2 protein                                    |
|                 |              |              | 0.856        | 0.851        | 1.004        |              |              |              |               |               |               | P27169       | PON1      | Serum paraoxonase/arylesterase 1                             |
| 1.073           | 0.982        | 1.076        | 0.922        | 0.950        | 1.051        | 0.967        | 0.988        | 0.934        | 1.031         | 1.056         | 1.007         | P11831       | SRF       | Serum response factor                                        |
| 1.086           | 0.941        | 1.010        | 1.024        | 0.983        | 1.069        | 1.031        | 1.024        | 0.964        | 1.087         | 1.042         | 0.997         | Q8NEF9       | SRFBP1    | Serum response factor-binding protein 1                      |
|                 |              |              |              |              |              | 1.135        | 1.060        | 1.031        |               |               |               | P58004       | SESN2     | Sestrin-2                                                    |
| 1.209           | 1.023        | 1.071        | 1.245        | 1.088        | 1.047        |              |              |              |               |               |               | Q8IYR2       | SMYD4     | SET and MYND domain-containing protein 4                     |
| 1.036           | 1.026        | 1.004        | 0.996        | 1.096        | 1.082        | 1.069        | 1.055        | 1.208        | 1.011         | 0.975         | 1.059         | Q6GMV2       | SMYD5     | SET and MYND domain-containing protein 5                     |
| 0.997           | 0.976        | 1.113        | 1.000        | 0.826        | 1.049        | 0.994        | 0.991        | 1.131        |               |               |               | Q8NE22       | SETD9     | SET domain-containing protein 9                              |
| 1.005           | 0.998        | 1.004        | 1.007        | 0.960        | 1.003        | 1.040        | 1.033        | 0.971        | 1.007         | 1.004         | 1.006         | Q9UBL3       | ASH2L     | Set1/Ash2 histone methyltransferase complex subunit ASH2     |
| 1.063           | 1.003        | 1.015        | 0.979        | 0.941        | 0.941        | 0.933        | 1.143        | 1.018        | 0.959         | 0.991         | 1.054         | Q9UQR0       | SCML2     | Sex comb on midleg-like protein 2                            |
| 1.035           | 1.003        | 1.008        | 1.017        | 1.088        | 0.969        | 1.031        | 1.027        | 1.015        | 1.020         | 0.974         | 0.958         | P10768       | ESD       | S-formylglutathione hydrolase                                |
| 1.042           | 1.043        | 1.047        | 0.869        | 1.100        | 0.844        | 1.076        | 0.953        | 1.101        | 1.042         | 0.972         | 1.053         | Q15464       | SHB       | SH2 domain-containing adapter protein B                      |
| 0.961           | 0.967        | 1.002        |              |              |              | 1.085        | 1.199        | 0.923        |               |               |               | Q9BRG2       | SH2D3A    | SH2 domain-containing protein 3A                             |
| 1.011           | 0.998        | 1.026        | 0.948        | 0.944        | 1.004        | 1.025        | 0.895        | 1.004        | 1.026         | 0.964         | 1.117         | Q9H788       | SH2D4A    | SH2 domain-containing protein 4A                             |
|                 |              |              |              |              |              |              |              |              | 0.975         | 0.960         | 1.010         | Q6ZV89       | SH2D5     | SH2 domain-containing protein 5                              |
| 1.091           | 0.913        | 1.151        | 0.964        | 0.927        | 0.977        | 0.925        | 1.089        | 1.018        | 1.042         | 1.049         | 1.064         | Q9NRF2       | SH2B1     | SH2B adapter protein 1                                       |
| 0.970           | 1.085        | 0.994        | 0.952        | 0.896        | 0.988        | 0.962        | 1.071        | 1.148        | 0.948         | 0.984         | 1.016         | Q9UQQ2       | SH2B3     | SH2B adapter protein 3                                       |
|                 |              |              | 0.922        | 0.771        | 0.880        | 1.034        | 1.140        | 0.942        |               |               |               | H9KV90       | SHANK1    | SH3 and multiple ankyrin repeat domains protein 1            |
| 0.995           | 0.995        | 1.003        | 1.003        | 0.971        | 0.973        | 0.989        | 0.959        | 0.944        | 0.977         | 0.982         | 1.026         | A1X283       | SH3PXD2B  | SH3 and PX domain-containing protein 2B                      |
| 6.314           | 6.870        | 6.533        | 2.957        | 3.561        | 4.761        |              |              |              | 3.622         | 4.115         | 3.693         | Q8TF17       | SH3TC2    | SH3 domain and tetratricopeptide repeat-containing protein 2 |
| 0.965           | 0.967        | 0.995        | 0.979        | 0.971        | 0.942        | 0.941        | 0.904        | 0.938        | 1.011         | 0.960         | 1.049         | Q9H299       | SH3BGRL3  | SH3 domain-binding glutamic acid-rich-like protein 3         |
| 1.089           | 0.987        | 0.984        | 0.974        | 0.958        | 0.990        | 0.997        | 0.927        | 0.977        | 1.049         | 0.998         | 0.974         | O75368       | SH3BGRL   | SH3 domain-binding glutamic acid-rich-like protein           |
| 1.008           | 1.004        | 1.003        | 0.999        | 0.984        | 1.018        | 1.029        | 1.050        | 0.891        | 0.989         | 1.005         | 1.074         | Q9Y3L3       | SH3BP1    | SH3 domain-binding protein 1                                 |
| 1.031           | 1.024        | 1.051        | 1.017        | 0.967        | 1.037        | 0.996        | 1.135        | 0.990        | 0.989         | 0.983         | 1.064         | Q9P0V3       | SH3BP4    | SH3 domain-binding protein 4                                 |
| 0.985           | 1.035        | 0.988        | 0.962        | 0.925        | 0.979        | 0.952        | 0.989        | 0.965        | 0.982         | 0.887         | 1.040         | Q96B97       | SH3KBP1   | SH3 domain-containing kinase-binding protein 1               |
| 1.021           | 1.020        | 1.012        | 0.985        | 1.026        | 1.074        | 1.062        | 0.908        | 1.002        | 1.119         | 1.010         | 1.055         | A0A0U1RQE4   | SH3D19    | SH3 domain-containing protein 19                             |



| Abundance Ratio |              |              |              |              |              |              |              |              |               |               |               | Accession ID | Gene name | Protein Description                                                 |
|-----------------|--------------|--------------|--------------|--------------|--------------|--------------|--------------|--------------|---------------|---------------|---------------|--------------|-----------|---------------------------------------------------------------------|
| 1 d<br>M1/C1    | 1 d<br>M2/C2 | 1 d<br>M3/C3 | 4 d<br>M1/C1 | 4 d<br>M2/C2 | 4 d<br>M3/C3 | 7 d<br>M1/C1 | 7 d<br>M2/C2 | 7 d<br>M3/C3 | 10 d<br>M1/C1 | 10 d<br>M2/C2 | 10 d<br>M3/C3 |              |           |                                                                     |
| 1.103           | 1.077        | 1.059        | 0.961        | 1.035        | 1.019        | 1.030        | 1.514        | 1.258        | 0.887         | 1.176         | 1.119         | Q8TBC3       | SHKBP1    | SH3KBP1-binding protein 1                                           |
| 1.038           | 0.932        | 0.992        | 0.940        | 1.047        | 1.017        | 0.992        | 1.101        | 1.019        | 0.944         | 1.021         | 1.014         | Q9H0F6       | SHARPIN   | Sharpin                                                             |
| 1.005           | 0.987        | 0.993        | 0.992        | 0.994        | 0.979        | 1.014        | 0.937        | 0.991        | 1.021         | 0.990         | 1.046         | A0MZ66       | SHTN1     | Shootin-1                                                           |
| 0.948           | 1.052        | 1.117        | 0.921        | 0.862        | 1.166        | 0.941        | 1.079        | 0.997        | 0.946         | 0.933         | 1.063         | Q9UIL1       | SCOC      | Short coiled-coil protein                                           |
| 1.036           | 1.003        | 1.058        | 0.986        | 0.831        | 0.986        | 0.949        | 1.252        | 1.038        | 0.965         | 0.920         | 0.997         | Q8TEL6       | TRPC4AP   | Short transient receptor potential channel 4-associated protein     |
| 1.061           | 1.017        | 1.034        | 1.038        | 0.951        | 0.972        | 1.030        | 1.069        | 0.989        | 1.057         | 0.986         | 1.021         | P45954       | ACADSB    | Short/branched chain specific acyl-CoA dehydrogenase, mitochondrial |
| 0.977           | 0.993        | 1.010        | 0.991        | 0.820        | 0.927        | 0.987        | 1.114        | 1.028        |               |               |               | O75911       | DHRS3     | Short-chain dehydrogenase/reductase 3                               |
| 0.996           | 0.998        | 1.022        | 1.035        | 1.015        | 1.001        | 1.030        | 1.020        | 1.010        | 1.007         | 0.963         | 1.012         | P16219       | ACADS     | Short-chain specific acyl-CoA dehydrogenase, mitochondrial          |
| 1.072           | 0.840        | 1.125        |              |              |              |              |              |              | 0.885         | 0.872         | 1.035         | Q5FBB7       | SGO1      | Shugoshin 1                                                         |
| 0.920           | 0.945        | 1.164        |              |              |              |              |              |              |               |               |               | Q562F6       | SGO2      | Shugoshin 2                                                         |
| 1.046           | 0.983        | 0.966        | 0.982        | 0.934        | 0.954        | 1.025        | 0.967        | 0.984        | 1.099         | 0.964         | 1.000         | Q9HAT2       | SIAE      | Sialate O-acetyltransferase                                         |
| 0.981           | 0.998        | 0.972        | 0.989        | 1.074        | 0.997        | 0.986        | 0.943        | 1.006        | 0.980         | 1.009         | 0.959         | Q9NR45       | NANS      | Sialic acid synthase                                                |
| 1.110           | 1.075        | 1.081        | 1.020        | 1.049        | 1.005        | 1.029        | 0.971        | 0.917        | 1.057         | 0.943         | 1.028         | Q99519       | NEU1      | Sialidase-1                                                         |
| 0.919           | 0.948        | 1.009        | 0.889        | 0.823        | 1.023        | 0.920        | 0.834        | 0.941        | 1.043         | 1.056         | 1.036         | Q9NRA2       | SLC17A5   | Sialin                                                              |
|                 |              |              |              |              |              |              |              |              | 1.016         | 0.868         | 0.939         | Q5T5P2       | KIAA1217  | Sickle tail protein homolog                                         |
| 0.979           | 1.006        | 0.963        | 0.998        | 0.991        | 1.002        | 1.011        | 1.067        | 1.013        | 1.022         | 0.975         | 1.044         | A0A1P0AYU5   | SFXN3     | Sideroflexin                                                        |
| 0.990           | 0.979        | 1.039        | 0.982        | 0.938        | 1.015        | 0.943        | 1.011        | 1.006        | 0.998         | 1.002         | 1.023         | Q9H9B4       | SFXN1     | Sideroflexin-1                                                      |
| 1.086           | 0.982        | 1.063        | 0.905        | 0.965        | 1.020        | 1.030        | 1.002        | 1.002        | 1.143         | 1.066         | 1.142         | Q96NB2       | SFXN2     | Sideroflexin-2                                                      |
| 0.921           | 0.894        | 1.085        | 1.063        | 0.961        | 1.056        | 0.937        | 1.104        | 0.991        | 0.937         | 0.935         | 1.026         | Q6P4A7       | SFXN4     | Sideroflexin-4                                                      |
|                 |              |              | 1.070        | 1.071        | 0.980        | 0.972        | 0.994        | 0.896        | 1.355         | 1.225         | 1.136         | Q8TD22       | SFXN5     | Sideroflexin-5                                                      |
| 0.981           | 0.938        | 1.072        | 1.000        | 0.823        | 1.010        | 0.987        | 0.993        | 1.022        | 0.923         | 0.993         | 0.864         | Q99720       | SIGMAR1   | Sigma non-opioid intracellular receptor 1                           |
| 0.948           | 0.932        | 0.994        | 0.977        | 0.883        | 1.093        | 1.025        | 0.932        | 0.998        | 1.091         | 1.019         | 1.026         | P67812       | SEC11A    | Signal peptidase complex catalytic subunit SEC11A                   |
| 0.999           | 0.902        | 1.049        | 0.919        | 0.992        | 1.093        | 0.997        | 0.963        | 1.007        | 1.108         | 0.987         | 1.129         | Q9BY50       | SEC11C    | Signal peptidase complex catalytic subunit SEC11C                   |
| 0.969           | 0.920        | 0.980        | 0.955        | 0.788        | 0.965        | 0.991        | 0.762        | 0.975        | 1.048         | 0.794         | 1.006         | X6R2S6       | SPCS1     | Signal peptidase complex subunit 1                                  |
| 0.943           | 0.957        | 1.021        | 0.985        | 0.854        | 1.026        | 0.965        | 0.924        | 0.961        | 0.990         | 0.964         | 0.945         | E9PI68       | SPCS2     | Signal peptidase complex subunit 2                                  |
| 0.990           | 0.988        | 1.009        | 0.982        | 0.908        | 1.006        | 0.978        | 1.024        | 0.997        | 0.953         | 0.990         | 0.983         | P61009       | SPCS3     | Signal peptidase complex subunit 3                                  |
| 1.064           | 1.105        | 1.166        | 1.105        | 0.907        | 1.040        | 0.954        | 1.126        | 0.997        | 1.094         | 1.232         | 0.978         | Q8TCT8       | SPPL2A    | Signal peptide peptidase-like 2A                                    |
| 0.998           | 1.031        | 0.914        | 0.986        | 0.950        | 0.972        | 0.992        | 1.060        | 0.953        | 1.046         | 1.047         | 0.972         | P37108       | SRP14     | Signal recognition particle 14 kDa protein                          |
| 0.911           | 0.977        | 0.915        | 1.016        | 0.944        | 1.034        | 1.061        | 0.990        | 0.973        | 0.979         | 1.013         | 0.982         | P09132       | SRP19     | Signal recognition particle 19 kDa protein                          |
| 0.931           | 1.003        | 0.975        | 0.992        | 0.995        | 1.017        | 1.003        | 0.998        | 1.019        | 0.996         | 0.982         | 1.011         | P61011       | SRP54     | Signal recognition particle 54 kDa protein                          |
| 0.939           | 0.936        | 0.942        | 0.957        | 1.131        | 0.972        | 1.001        | 0.683        | 1.032        | 1.011         | 1.021         | 0.986         | P49458       | SRP9      | Signal recognition particle 9 kDa protein                           |

| Abundance Ratio |              |              |              |              |              |              |              |              |               |               |               | Accession ID | Gene name | Protein Description                                                  |
|-----------------|--------------|--------------|--------------|--------------|--------------|--------------|--------------|--------------|---------------|---------------|---------------|--------------|-----------|----------------------------------------------------------------------|
| 1 d<br>M1/C1    | 1 d<br>M2/C2 | 1 d<br>M3/C3 | 4 d<br>M1/C1 | 4 d<br>M2/C2 | 4 d<br>M3/C3 | 7 d<br>M1/C1 | 7 d<br>M2/C2 | 7 d<br>M3/C3 | 10 d<br>M1/C1 | 10 d<br>M2/C2 | 10 d<br>M3/C3 |              |           |                                                                      |
| 0.920           | 1.009        | 1.031        | 1.029        | 0.951        | 1.037        | 1.003        | 1.026        | 0.982        | 0.985         | 1.005         | 1.002         | P08240       | SRPRA     | Signal recognition particle receptor subunit alpha                   |
| 0.965           | 1.000        | 1.011        | 0.988        | 0.969        | 0.990        | 1.043        | 1.030        | 0.964        | 1.011         | 1.012         | 0.986         | Q9Y5M8       | SRPRB     | Signal recognition particle receptor subunit beta                    |
| 0.999           | 0.996        | 0.998        | 1.006        | 0.996        | 1.022        | 0.984        | 0.986        | 1.002        | 0.991         | 1.015         | 1.010         | Q9UHB9       | SRP68     | Signal recognition particle subunit SRP68                            |
| 0.983           | 1.004        | 0.999        | 0.990        | 1.005        | 1.012        | 0.976        | 0.992        | 0.976        | 0.994         | 1.012         | 1.016         | O76094       | SRP72     | Signal recognition particle subunit SRP72                            |
| 0.981           | 1.009        | 1.004        | 1.027        | 1.015        | 0.996        | 1.063        | 1.017        | 1.031        | 1.057         | 0.986         | 1.038         | P42224       | STAT1     | Signal transducer and activator of transcription 1-<br>alpha/beta    |
| 1.037           | 1.010        | 1.031        | 1.011        | 1.013        | 1.031        | 0.991        | 1.049        | 1.022        | 1.094         | 0.969         | 1.001         | P52630       | STAT2     | Signal transducer and activator of transcription 2                   |
| 0.966           | 1.000        | 1.004        | 0.984        | 0.939        | 0.965        | 0.988        | 1.009        | 0.980        | 0.994         | 0.956         | 0.991         | P40763       | STAT3     | Signal transducer and activator of transcription 3                   |
| 1.012           | 1.015        | 0.992        | 0.996        | 0.954        | 1.032        | 0.990        | 1.036        | 1.010        | 1.051         | 1.022         | 1.067         | P51692       | STAT5B    | Signal transducer and activator of transcription 5B                  |
| 1.016           | 1.026        | 1.021        | 1.031        | 1.034        | 1.039        | 1.000        | 1.011        | 0.992        | 0.987         | 0.942         | 0.983         | P42226       | STAT6     | Signal transducer and activator of transcription 6                   |
|                 |              |              | 1.140        | 0.918        | 0.962        | 1.142        | 1.038        | 1.078        |               |               |               | J3KPM9       | STAT1     | Signal transducer and activator of transcription                     |
| 0.987           | 1.002        | 0.985        | 0.979        | 0.995        | 1.059        | 0.988        | 0.990        | 1.029        | 0.986         | 1.016         | 1.016         | Q92783       | STAM      | Signal transducing adapter molecule 1                                |
| 0.990           | 0.981        | 0.985        | 0.967        | 0.968        | 0.997        | 0.970        | 0.987        | 1.009        | 0.989         | 0.996         | 1.028         | O75886       | STAM2     | Signal transducing adapter molecule 2                                |
| 1.064           | 1.027        | 1.054        | 0.986        | 0.959        | 1.016        | 0.972        | 1.026        | 0.987        | 0.973         | 0.995         | 1.064         | O43166       | SIPA1L1   | Signal-induced proliferation-associated 1-like protein 1             |
| 1.020           | 0.993        | 1.060        | 0.975        | 0.865        | 0.969        | 1.068        | 1.120        | 1.031        | 0.966         | 0.949         | 1.085         | O60292       | SIPA1L3   | Signal-induced proliferation-associated 1-like protein 3             |
| 0.999           | 0.946        | 1.036        | 0.941        | 0.914        | 1.046        | 1.007        | 0.960        | 0.958        | 0.985         | 0.977         | 1.016         | Q96FS4       | SIPA1     | Signal-induced proliferation-associated protein 1                    |
| 1.052           | 1.030        | 1.053        | 1.047        | 1.021        | 0.973        | 1.049        | 1.022        | 0.993        | 0.934         | 0.953         | 1.018         | Q9H7L9       | SUDS3     | Sin3 histone deacetylase corepressor complex<br>component SDS3       |
|                 |              |              | 0.802        | 0.857        | 1.133        | 1.203        | 0.984        | 0.907        |               |               |               | A2RU48       | SMCO3     | Single-pass membrane and coiled-coil domain-<br>containing protein 3 |
| 0.913           | 0.983        | 1.027        | 0.965        | 0.981        | 1.042        | 1.024        | 1.171        | 1.012        | 1.091         | 1.050         | 1.198         | Q53HV7       | SMUG1     | Single-strand selective monofunctional uracil DNA<br>glycosylase     |
|                 |              |              | 1.083        | 0.928        | 0.984        | 1.008        | 1.078        | 0.992        | 0.977         | 0.914         | 0.960         | Q9BWW4       | SSBP3     | Single-stranded DNA-binding protein 3                                |
| 0.984           | 0.997        | 0.959        | 0.988        | 0.953        | 0.986        | 0.989        | 1.039        | 0.977        | 1.010         | 1.007         | 0.983         | Q04837       | SSBP1     | Single-stranded DNA-binding protein, mitochondrial                   |
| 0.991           | 0.982        | 1.005        | 1.012        | 0.928        | 0.990        | 0.993        | 1.129        | 0.993        | 0.920         | 0.959         | 1.020         | Q9BVC3       | DSCC1     | Sister chromatid cohesion protein DCC1                               |
| 0.990           | 1.000        | 1.009        | 1.010        | 0.958        | 1.022        | 1.007        | 0.999        | 1.011        | 0.961         | 0.983         | 1.012         | Q29RF7       | PDS5A     | Sister chromatid cohesion protein PDS5 homolog A                     |
| 1.017           | 1.006        | 1.048        | 1.000        | 0.949        | 1.019        | 0.981        | 1.002        | 1.012        | 0.964         | 0.972         | 0.994         | Q9NTI5       | PDS5B     | Sister chromatid cohesion protein PDS5 homolog B                     |
| 0.994           | 0.907        | 1.011        | 1.250        | 1.794        | 1.566        | 0.676        | 1.045        | 1.268        |               |               |               | O43805       | SSNA1     | Sjogren syndrome nuclear autoantigen 1                               |

| Abundance Ratio |              |              |              |              |              |              |              |              |               |               |               | Accession ID | Gene name | Protein Description                                                    |
|-----------------|--------------|--------------|--------------|--------------|--------------|--------------|--------------|--------------|---------------|---------------|---------------|--------------|-----------|------------------------------------------------------------------------|
| 1 d<br>M1/C1    | 1 d<br>M2/C2 | 1 d<br>M3/C3 | 4 d<br>M1/C1 | 4 d<br>M2/C2 | 4 d<br>M3/C3 | 7 d<br>M1/C1 | 7 d<br>M2/C2 | 7 d<br>M3/C3 | 10 d<br>M1/C1 | 10 d<br>M2/C2 | 10 d<br>M3/C3 |              |           |                                                                        |
| 1.013           | 1.013        | 1.002        | 0.997        | 1.055        | 1.031        | 1.120        | 0.887        | 1.020        | 1.014         | 1.023         | 1.015         | O60232       | SSSCA1    | Sjogren syndrome/scleroderma autoantigen 1                             |
| 0.942           | 1.002        | 1.028        | 0.976        | 0.907        | 1.022        | 0.978        | 1.131        | 1.054        | 0.968         | 0.980         | 1.040         | B1PBA3       | SMPD4     | SKNY protein                                                           |
|                 |              |              | 1.255        | 1.000        | 1.080        |              |              |              |               |               |               | D6RIF6       | SLAIN2    | SLAIN motif-containing protein 2                                       |
| 0.987           | 0.995        | 1.037        | 1.035        | 0.973        | 0.981        | 0.963        | 0.916        | 0.975        | 1.032         | 1.007         | 1.027         | Q9P270       | SLAIN2    | SLAIN motif-containing protein 2                                       |
| 1.041           | 1.007        | 1.034        | 1.032        | 0.986        | 0.955        | 0.997        | 1.054        | 1.020        | 1.037         | 1.121         | 1.035         | L0R6Q1       | SLC35A4   | SLC35A4 upstream open reading frame protein                            |
|                 |              |              |              |              |              |              |              |              | 0.936         | 0.983         | 0.735         | Q8IW52       | SLITRK4   | SLIT and NTRK-like protein 4                                           |
| 0.930           | 1.003        | 1.082        | 0.955        | 0.942        | 1.022        | 0.961        | 1.039        | 0.955        | 1.076         | 1.014         | 1.032         | O75093       | SLIT1     | Slit homolog 1 protein                                                 |
| 0.948           | 0.992        | 1.016        | 0.983        | 0.961        | 1.021        | 0.983        | 1.001        | 1.015        | 0.986         | 0.957         | 1.049         | A2RUF3       | SRGAP2    | SLIT-ROBO Rho GTPase activating protein 2                              |
| 0.971           | 1.005        | 1.052        | 0.974        | 0.928        | 1.024        | 1.042        | 0.987        | 1.007        | 1.003         | 0.997         | 1.025         | Q7Z6B7       | SRGAP1    | SLIT-ROBO Rho GTPase-activating protein 1                              |
| 1.172           | 1.045        | 1.377        | 0.914        | 0.933        | 0.973        | 0.941        | 0.959        | 1.078        | 1.101         | 0.920         | 1.109         | O43295       | SRGAP3    | SLIT-ROBO Rho GTPase-activating protein 3                              |
| 1.143           | 0.961        | 1.011        | 0.923        | 0.979        | 1.033        | 1.017        | 0.791        | 0.971        | 1.034         | 1.085         | 1.013         | Q8TAD8       | SNIP1     | Smad nuclear-interacting protein 1                                     |
| 0.982           | 1.005        | 1.002        | 0.939        | 0.970        | 0.984        | 0.938        | 0.855        | 0.947        | 0.996         | 0.970         | 0.990         | O00193       | SMAP      | Small acidic protein                                                   |
| 0.933           | 0.962        | 1.059        | 0.858        | 0.885        | 0.975        | 0.954        | 0.668        | 0.885        | 1.153         | 0.876         | 1.002         | P84101       | SERF2     | Small EDRK-rich factor 2                                               |
| 0.936           | 0.998        | 0.925        | 0.984        | 1.054        | 0.997        | 1.002        | 0.906        | 0.983        | 0.987         | 1.044         | 0.974         | O43765       | SGTA      | Small glutamine-rich tetratricopeptide repeat-containing protein alpha |
| 1.049           | 1.003        | 1.004        | 1.012        | 0.956        | 1.014        | 0.996        | 1.046        | 0.949        | 1.045         | 1.014         | 0.946         | Q96EQ0       | SGTB      | Small glutamine-rich tetratricopeptide repeat-containing protein beta  |
|                 |              |              |              |              |              |              |              |              | 0.996         | 1.008         | 1.122         | B2RUZ4       | SMIM1     | Small integral membrane protein 1                                      |
| 1.157           | 0.583        | 1.111        |              |              |              |              |              |              |               |               |               | P58511       | SMIM11A   | Small integral membrane protein 11A                                    |
| 1.084           | 0.970        | 1.015        | 1.022        | 0.993        | 0.993        | 0.969        | 0.973        | 0.964        | 1.121         | 0.952         | 0.976         | Q96EX1       | SMIM12    | Small integral membrane protein 12                                     |
| 0.924           | 0.989        | 0.860        | 0.858        | 0.928        | 0.935        |              |              |              | 0.955         | 1.057         | 1.024         | Q7Z3B0       | SMIM15    | Small integral membrane protein 15                                     |
| 1.069           | 1.062        | 1.160        |              |              |              | 0.963        | 0.984        | 0.819        |               |               |               | Q8WV10       | SMIM4     | Small integral membrane protein 4                                      |
| 1.024           | 1.068        | 0.952        |              |              |              | 1.151        | 1.112        | 0.997        |               |               |               | Q9Y448       | KNSTRN    | Small kinetochore-associated protein                                   |
| 1.024           | 1.014        | 1.014        | 0.962        | 0.956        | 1.009        | 0.985        | 1.057        | 1.046        | 0.910         | 1.002         | 0.943         | P62304       | SNRPE     | Small nuclear ribonucleoprotein E                                      |
| 1.051           | 1.077        | 0.964        | 1.080        | 1.399        | 0.979        | 1.070        | 0.966        | 1.016        | 1.063         | 1.072         | 0.991         | P62306       | SNRPF     | Small nuclear ribonucleoprotein F                                      |
| 1.090           | 1.004        | 1.064        | 1.015        | 0.993        | 1.111        | 1.043        | 1.131        | 1.051        | 1.028         | 1.057         | 1.046         | P62314       | SNRPD1    | Small nuclear ribonucleoprotein Sm D1                                  |
| 1.003           | 0.995        | 1.002        | 1.025        | 1.100        | 1.019        | 1.000        | 0.980        | 1.017        | 0.999         | 1.042         | 0.957         | P62316       | SNRPD2    | Small nuclear ribonucleoprotein Sm D2                                  |
| 0.945           | 0.999        | 0.942        | 0.970        | 0.999        | 1.031        | 0.997        | 1.071        | 1.003        | 0.984         | 1.004         | 0.983         | P62318       | SNRPD3    | Small nuclear ribonucleoprotein Sm D3                                  |
| 1.014           | 0.986        | 1.021        | 1.016        | 0.925        | 1.035        | 1.001        | 1.046        | 1.020        | 0.987         | 1.057         | 0.999         | O75691       | UTP20     | Small subunit processome component 20 homolog                          |
| 0.952           | 1.033        | 0.997        | 0.993        | 0.920        | 1.046        | 0.975        | 0.871        | 0.968        | 1.010         | 0.953         | 1.042         | B8ZZN6       | SUMO1     | Small ubiquitin-related modifier 1                                     |
| 0.943           | 0.939        | 0.995        | 0.923        | 0.912        | 0.950        | 0.970        | 0.886        | 0.962        | 1.032         | 0.958         | 1.046         | P61956       | SUMO2     | Small ubiquitin-related modifier 2                                     |
| 0.943           | 0.979        | 0.948        | 0.957        | 0.950        | 0.977        | 0.931        | 0.935        | 0.941        | 0.975         | 0.950         | 0.961         | A8MU27       | SUMO3     | Small ubiquitin-related modifier 3                                     |
| 0.872           | 1.025        | 1.098        | 0.990        | 0.818        | 1.079        | 1.101        | 0.948        | 0.913        | 1.008         | 0.947         | 1.007         | Q8NHG7       | SVIP      | Small VCP/p97-interacting protein                                      |
| 0.997           | 0.972        | 1.022        | 0.966        | 0.922        | 0.988        | 0.985        | 1.010        | 0.982        | 1.002         | 0.981         | 1.118         | Q9HBD4       | SMARCA4   | SMARCA4 isoform 2                                                      |

| Abundance Ratio |              |              |              |              |              |              |              |              |               |               |               | Accession ID | Gene name    | Protein Description                                   |
|-----------------|--------------|--------------|--------------|--------------|--------------|--------------|--------------|--------------|---------------|---------------|---------------|--------------|--------------|-------------------------------------------------------|
| 1 d<br>M1/C1    | 1 d<br>M2/C2 | 1 d<br>M3/C3 | 4 d<br>M1/C1 | 4 d<br>M2/C2 | 4 d<br>M3/C3 | 7 d<br>M1/C1 | 7 d<br>M2/C2 | 7 d<br>M3/C3 | 10 d<br>M1/C1 | 10 d<br>M2/C2 | 10 d<br>M3/C3 |              |              |                                                       |
| 0.972           | 0.999        | 1.047        | 0.967        | 0.990        | 0.990        | 0.934        | 1.046        | 1.051        | 0.966         | 0.972         | 0.992         | B4DUC8       | MTAP         | S-methyl-5'-thioadenosine phosphorylase               |
| 0.984           | 1.025        | 0.995        | 0.939        | 0.949        | 0.979        | 0.987        | 1.014        | 0.920        | 1.019         | 0.953         | 1.000         | F8WES2       | MTAP         | S-methyl-5'-thioadenosine phosphorylase               |
| 0.909           | 1.057        | 0.963        | 0.968        | 0.892        | 1.089        | 1.079        | 1.024        | 1.096        | 1.064         | 0.924         | 1.100         | Q8NCG7       | DAGLB        | Sn1-specific diacylglycerol lipase beta               |
| 1.041           | 1.012        | 0.966        | 1.026        | 0.997        | 1.004        | 1.012        | 1.077        | 1.033        | 1.049         | 1.021         | 1.019         | O95295       | SNAPIN       | SNARE-associated protein Snapin                       |
|                 |              |              |              |              |              |              |              |              | 1.042         | 0.962         | 1.058         | A0A0B4J2F2   | LOC102724428 | SNF1-like kinase, isoform CRA_a                       |
| 1.055           | 1.135        | 0.953        | 0.997        | 1.053        | 0.985        | 1.169        | 0.859        | 0.932        |               |               |               | Q9NRH2       | SNRK         | SNF-related serine/threonine-protein kinase           |
|                 |              |              | 1.034        | 1.019        | 1.111        |              |              |              | 1.055         | 0.988         | 1.069         | Q16533       | SNAPC1       | snRNA-activating protein complex subunit 1            |
| 0.950           | 1.012        | 1.199        |              |              |              | 1.098        | 1.074        | 1.267        |               |               |               | Q92966       | SNAPC3       | snRNA-activating protein complex subunit 3            |
| 0.927           | 1.063        | 1.061        | 1.236        | 1.512        | 1.106        | 1.076        | 0.946        | 0.942        | 1.029         | 1.000         | 1.129         | O95149       | SNUPN        | Snurportin-1                                          |
| 1.012           | 1.004        | 0.994        | 0.998        | 0.983        | 0.999        | 1.017        | 0.995        | 0.961        | 1.026         | 1.053         | 1.013         | Q13573       | SNW1         | SNW domain-containing protein 1                       |
|                 |              |              | 1.044        | 0.896        | 1.028        | 0.995        | 0.976        | 1.052        | 1.048         | 1.149         | 1.060         | P48029       | SLC6A8       | Sodium- and chloride-dependent creatine transporter 1 |
| 0.864           | 0.959        | 0.937        |              |              |              |              |              |              |               |               |               | Q96NL6       | SCLT1        | Sodium channel and clathrin linker 1                  |
|                 |              |              |              |              |              |              |              |              | 0.941         | 1.092         | 1.072         | Q9BWG6       | SCNM1        | Sodium channel modifier 1                             |
| 1.171           | 0.949        | 1.022        | 1.128        | 0.942        | 0.981        |              |              |              |               |               |               | P32418       | SLC8A1       | Sodium/calcium exchanger 1                            |
| 1.107           | 1.263        | 1.354        | 1.032        | 1.332        | 1.115        | 1.235        | 2.620        | 0.989        |               |               |               | P19634       | SLC9A1       | Sodium/hydrogen exchanger 1                           |
| 0.938           | 0.993        | 0.975        | 1.005        | 0.922        | 1.148        | 1.129        | 1.027        | 1.065        | 1.133         | 1.041         | 1.174         | A0A087WXD1   | SLC9A7       | Sodium/hydrogen exchanger                             |
| 0.983           | 1.004        | 1.014        | 0.884        | 0.763        | 0.924        | 0.985        | 0.992        | 0.902        | 1.039         | 0.795         | 1.039         | P53794       | SLC5A3       | Sodium/myo-inositol cotransporter                     |
|                 |              |              | 1.001        | 0.899        | 1.007        |              |              |              | 1.065         | 1.022         | 1.006         | Q6J4K2       | SLC8B1       | Sodium/potassium/calcium exchanger 6, mitochondrial   |
| 0.948           | 0.982        | 0.981        | 0.987        | 0.907        | 1.005        | 1.010        | 0.993        | 1.016        | 1.059         | 1.011         | 1.014         | P05023       | ATP1A1       | Sodium/potassium-transporting ATPase subunit alpha-1  |
| 1.146           | 0.935        | 1.071        | 0.940        | 0.762        | 1.092        | 1.078        | 0.934        | 1.134        | 1.040         | 1.196         | 1.085         | P50993       | ATP1A2       | Sodium/potassium-transporting ATPase subunit alpha-2  |
| 1.023           | 1.005        | 0.983        | 0.978        | 0.998        | 1.067        | 1.006        | 1.057        | 0.909        |               |               |               | A0A0A0MT26   | ATP1A3       | Sodium/potassium-transporting ATPase subunit alpha-3  |
| 0.950           | 1.005        | 0.987        | 1.012        | 0.913        | 0.958        | 1.008        | 0.994        | 0.954        | 1.085         | 0.997         | 0.963         | P05026       | ATP1B1       | Sodium/potassium-transporting ATPase subunit beta-1   |
| 1.009           | 1.001        | 0.993        | 1.019        | 0.922        | 0.988        | 1.051        | 1.111        | 1.016        | 1.029         | 1.039         | 0.991         | P54709       | ATP1B3       | Sodium/potassium-transporting ATPase subunit beta-3   |
| 0.873           | 1.014        | 0.955        | 0.989        | 0.828        | 1.141        | 1.154        | 1.061        | 1.026        | 1.150         | 1.051         | 1.113         | F8VX04       | SLC38A1      | Sodium-coupled neutral amino acid transporter 1       |
| 0.992           | 1.015        | 1.054        | 0.992        | 0.784        | 1.067        | 1.059        | 1.148        | 1.126        | 1.128         | 0.946         | 1.041         | Q96QD8       | SLC38A2      | Sodium-coupled neutral amino acid transporter 2       |
|                 |              |              |              |              |              |              |              |              | 0.924         | 1.076         | 1.405         | Q8NBW4       | SLC38A9      | Sodium-coupled neutral amino acid transporter 9       |
| 1.122           | 0.980        | 1.033        | 0.879        | 0.865        | 0.909        | 1.015        | 1.205        | 0.967        | 1.075         | 1.127         | 1.078         | Q9Y289       | SLC5A6       | Sodium-dependent multivitamin transporter             |
|                 |              |              | 1.103        | 1.226        | 1.164        | 1.125        | 1.155        | 1.018        | 1.060         | 1.094         | 1.204         | Q8WUM9       | SLC20A1      | Sodium-dependent phosphate transporter 1              |
|                 |              |              | 1.039        | 0.928        | 0.964        | 0.899        | 1.277        | 1.072        |               |               |               | Q86WA9       | SLC26A11     | Sodium-independent sulfate anion transporter          |

| Abundance Ratio |              |              |              |              |              |              |              |              |               |               |               | Accession ID | Gene name | Protein Description                                                             |
|-----------------|--------------|--------------|--------------|--------------|--------------|--------------|--------------|--------------|---------------|---------------|---------------|--------------|-----------|---------------------------------------------------------------------------------|
| 1 d<br>M1/C1    | 1 d<br>M2/C2 | 1 d<br>M3/C3 | 4 d<br>M1/C1 | 4 d<br>M2/C2 | 4 d<br>M3/C3 | 7 d<br>M1/C1 | 7 d<br>M2/C2 | 7 d<br>M3/C3 | 10 d<br>M1/C1 | 10 d<br>M2/C2 | 10 d<br>M3/C3 |              |           |                                                                                 |
| 0.986           | 0.931        | 1.022        | 0.959        | 0.819        | 0.923        | 1.051        | 1.236        | 1.033        | 1.052         | 0.923         | 1.141         | Q8WVQ1       | CANT1     | Soluble calcium-activated nucleotidase 1                                        |
| 0.993           | 0.998        | 1.048        | 0.963        | 0.996        | 0.973        | 0.986        | 1.043        | 0.960        | 1.008         | 1.004         | 1.016         | Q9Y6X4       | FAM169A   | Soluble lamin-associated protein of 75 kDa                                      |
| 1.014           | 1.013        | 1.026        | 1.051        | 1.058        | 1.124        | 1.056        | 1.146        | 1.078        | 1.048         | 1.035         | 1.134         | P55011       | SLC12A2   | Solute carrier family 12 member 2                                               |
| 1.009           | 1.049        | 1.021        | 0.996        | 0.977        | 1.085        | 1.054        | 1.120        | 1.113        | 0.999         | 0.922         | 1.035         | Q9UP95       | SLC12A4   | Solute carrier family 12 member 4                                               |
| 0.987           | 0.979        | 1.018        | 1.044        | 0.945        | 1.095        | 1.053        | 1.081        | 1.029        | 1.074         | 0.995         | 1.072         | A0A0G2JNW7   | SLC12A7   | Solute carrier family 12 member 7                                               |
| 0.996           | 0.918        | 1.049        | 0.994        | 0.845        | 1.044        | 1.079        | 1.031        | 1.110        | 1.083         | 1.018         | 1.056         | Q9BXP2       | SLC12A9   | Solute carrier family 12 member 9                                               |
| 1.146           | 1.179        | 1.072        | 1.025        | 0.823        | 1.053        | 1.091        | 1.027        | 1.069        | 1.110         | 1.049         | 1.027         | Q8N697       | SLC15A4   | Solute carrier family 15 member 4                                               |
| 0.885           | 0.938        | 0.952        | 0.875        | 0.821        | 1.122        | 0.971        | 1.087        | 1.006        | 1.113         | 0.903         | 1.091         | P11166       | SLC2A1    | Solute carrier family 2, facilitated glucose transporter member 1               |
| 0.993           | 0.967        | 1.020        | 1.024        | 1.045        | 1.039        | 1.033        | 1.035        | 1.272        | 1.163         | 1.040         | 1.110         | A0A024RCG2   | SLC22A18  | Solute carrier family 22 (Organic cation transporter), member 18, isoform CRA_a |
| 1.022           | 1.194        | 0.816        | 0.771        | 0.769        | 0.876        |              |              |              |               |               |               | Q9UGH3       | SLC23A2   | Solute carrier family 23 member 2                                               |
| 1.105           | 0.962        | 0.982        | 0.906        | 0.888        | 0.999        | 1.024        | 1.180        | 0.962        | 0.931         | 0.889         | 0.999         | Q9BSK2       | SLC25A33  | Solute carrier family 25 member 33                                              |
| 0.938           | 0.933        | 0.961        | 0.860        | 0.914        | 1.021        | 0.998        | 1.106        | 0.966        | 1.152         | 1.423         | 0.912         | Q3KQZ1       | SLC25A35  | Solute carrier family 25 member 35                                              |
| 0.946           | 1.160        | 0.888        | 1.039        | 1.010        | 0.972        | 0.933        | 1.120        | 1.140        | 0.999         | 0.966         | 0.973         | Q9BZJ4       | SLC25A39  | Solute carrier family 25 member 39                                              |
| 0.973           | 0.988        | 1.030        | 0.998        | 0.822        | 1.014        | 0.954        | 0.958        | 1.007        | 0.979         | 0.966         | 1.005         | Q8TBP6       | SLC25A40  | Solute carrier family 25 member 40                                              |
|                 |              |              | 0.950        | 0.937        | 1.105        | 1.024        | 1.219        | 0.926        |               |               |               | E9PGQ0       | SLC25A44  | Solute carrier family 25 member 44                                              |
| 1.123           | 0.957        | 1.062        | 0.967        | 0.815        | 1.114        | 1.084        | 1.091        | 0.968        | 1.163         | 1.076         | 1.051         | Q96AG3       | SLC25A46  | Solute carrier family 25 member 46                                              |
| 1.124           | 1.044        | 1.091        | 1.164        | 1.063        | 0.996        | 1.193        | 1.122        | 0.915        | 1.093         | 1.028         | 0.979         | Q9H1U9       | SLC25A51  | Solute carrier family 25 member 51                                              |
|                 |              |              |              |              |              | 1.071        | 0.943        | 1.312        | 1.057         | 0.905         | 1.253         | Q9BXS9       | SLC26A6   | Solute carrier family 26 member 6                                               |
|                 |              |              | 0.994        | 1.027        | 1.038        | 0.934        | 0.774        | 1.238        |               |               |               | Q96K37       | SLC35E1   | Solute carrier family 35 member E1                                              |
|                 |              |              |              |              |              |              |              |              | 1.280         | 1.022         | 0.934         | Q6ICL7       | SLC35E4   | Solute carrier family 35 member E4                                              |
| 0.965           | 1.033        | 1.042        | 0.966        | 0.888        | 0.980        | 0.971        | 1.017        | 0.963        | 1.112         | 1.073         | 0.971         | Q8IXU6       | SLC35F2   | Solute carrier family 35 member F2                                              |
| 0.939           | 1.024        | 1.073        | 0.914        | 0.930        | 1.139        | 1.028        | 0.777        | 0.959        | 1.359         | 1.117         | 1.070         | Q8N357       | SLC35F6   | Solute carrier family 35 member F6                                              |
| 0.975           | 1.399        | 1.974        | 0.947        | 1.194        | 1.329        | 1.060        | 1.081        | 0.951        |               |               |               | Q96JW4       | SLC41A2   | Solute carrier family 41 member 2                                               |
| 0.969           | 0.961        | 1.245        |              |              |              | 1.051        | 1.188        | 1.070        | 1.070         | 1.029         | 0.967         | Q96GZ6       | SLC41A3   | Solute carrier family 41 member 3                                               |
| 1.022           | 1.029        | 1.023        | 0.871        | 0.816        | 1.072        | 1.036        | 1.109        | 1.039        | 1.144         | 1.036         | 0.971         | Q9HAB3       | SLC52A2   | Solute carrier family 52, riboflavin transporter, member 2                      |
| 0.859           | 1.024        | 1.024        | 0.958        | 0.889        | 1.067        | 1.177        | 0.985        | 1.013        | 1.197         | 0.971         | 1.215         | Q96BD0       | SLCO4A1   | Solute carrier organic anion transporter family member 4A1                      |
| 1.000           | 0.997        | 1.011        | 0.962        | 0.979        | 1.030        | 1.039        | 1.014        | 0.972        | 1.012         | 1.016         | 1.039         | Q9NQZ2       | UTP3      | Something about silencing protein 10                                            |
| 1.033           | 0.964        | 1.020        | 1.028        | 0.927        | 1.010        | 1.017        | 1.051        | 1.057        | 1.021         | 0.926         | 1.092         | Q07889       | SOS1      | Son of sevenless homolog 1                                                      |
| 0.995           | 1.015        | 1.021        | 0.917        | 0.820        | 0.960        | 0.973        | 0.887        | 0.956        | 1.030         | 0.924         | 1.069         | Q15465       | SHH       | Sonic hedgehog protein                                                          |
| 1.017           | 0.997        | 1.010        | 0.990        | 0.986        | 1.025        | 0.998        | 0.971        | 1.032        | 1.016         | 0.997         | 1.007         | Q00796       | SORD      | Sorbitol dehydrogenase                                                          |
| 1.485           | 1.013        | 1.090        | 1.364        | 3.250        | 0.818        | 1.304        | 0.777        | 1.130        | 1.274         | 1.035         | 1.024         | E9PG82       | SRI       | Sorcin                                                                          |

| Abundance Ratio |              |              |              |              |              |              |              |              |               |               |               | Accession ID | Gene name | Protein Description                                   |
|-----------------|--------------|--------------|--------------|--------------|--------------|--------------|--------------|--------------|---------------|---------------|---------------|--------------|-----------|-------------------------------------------------------|
| 1 d<br>M1/C1    | 1 d<br>M2/C2 | 1 d<br>M3/C3 | 4 d<br>M1/C1 | 4 d<br>M2/C2 | 4 d<br>M3/C3 | 7 d<br>M1/C1 | 7 d<br>M2/C2 | 7 d<br>M3/C3 | 10 d<br>M1/C1 | 10 d<br>M2/C2 | 10 d<br>M3/C3 |              |           |                                                       |
| 0.970           | 1.004        | 0.957        | 0.999        | 1.128        | 1.022        | 1.022        | 0.986        | 1.009        | 0.973         | 0.987         | 0.946         | P30626       | SRI       | Sorcin                                                |
| 0.883           | 0.991        | 1.000        |              |              |              |              |              |              |               |               |               | B5MBX0       | CDCA5     | Sororin                                               |
| 0.971           | 0.924        | 1.002        | 0.998        | 0.912        | 1.042        |              |              |              | 1.017         | 1.007         | 1.255         | Q99523       | SORT1     | Sortilin                                              |
| 1.002           | 1.006        | 0.982        | 1.009        | 1.000        | 0.962        | 1.031        | 1.066        | 1.009        | 1.028         | 1.006         | 0.999         | Q9Y512       | SAMM50    | Sorting and assembly machinery component 50 homolog   |
| 0.979           | 0.974        | 0.979        | 0.988        | 1.003        | 1.014        | 1.003        | 0.997        | 1.002        | 1.017         | 0.985         | 1.018         | A0A0A0MRI2   | SNX6      | Sorting nexin                                         |
| 1.017           | 0.958        | 0.979        | 1.030        | 0.946        | 0.964        | 1.077        | 0.954        | 0.996        | 1.134         | 0.853         | 1.008         | Q13596       | SNX1      | Sorting nexin-1                                       |
|                 |              |              |              |              |              | 1.053        | 1.344        | 0.995        |               |               |               | A0A087WUJ3   | SNX10     | Sorting nexin-10                                      |
| 1.000           | 0.918        | 1.112        | 0.902        | 0.858        | 1.063        | 1.615        | 0.968        | 1.082        |               |               |               | Q9Y5W9       | SNX11     | Sorting nexin-11                                      |
| 1.030           | 1.001        | 0.972        | 1.024        | 0.980        | 1.005        | 0.999        | 1.092        | 1.000        | 1.029         | 0.998         | 0.974         | A0A087X0R6   | SNX12     | Sorting nexin-12                                      |
| 1.040           | 1.118        | 1.038        | 0.961        | 0.925        | 1.035        | 0.942        | 1.095        | 1.029        | 1.020         | 1.018         | 1.042         | Q9Y5W8       | SNX13     | Sorting nexin-13                                      |
| 0.886           | 1.070        | 1.142        | 0.978        | 0.941        | 1.033        | 1.011        | 1.069        | 0.935        | 0.883         | 0.889         | 1.052         | Q9Y5W7       | SNX14     | Sorting nexin-14                                      |
| 1.030           | 0.999        | 0.996        | 1.018        | 0.945        | 1.010        | 1.018        | 1.017        | 1.022        | 1.028         | 0.940         | 1.025         | Q9NRS6       | SNX15     | Sorting nexin-15                                      |
| 1.085           | 1.002        | 1.087        | 1.145        | 1.060        | 0.911        | 0.948        | 1.103        | 0.992        | 0.953         | 1.050         | 0.951         | P57768       | SNX16     | Sorting nexin-16                                      |
| 1.046           | 1.016        | 1.005        | 0.999        | 1.008        | 1.039        | 1.015        | 1.083        | 1.035        | 0.986         | 0.930         | 1.035         | Q15036       | SNX17     | Sorting nexin-17                                      |
| 0.982           | 0.993        | 0.992        | 1.003        | 0.997        | 1.011        | 0.984        | 1.049        | 0.993        | 1.002         | 0.990         | 0.999         | O60749       | SNX2      | Sorting nexin-2                                       |
| 1.068           | 0.926        | 0.977        | 1.009        | 0.947        | 1.052        | 0.941        | 1.132        | 1.036        | 1.046         | 0.953         | 1.111         | Q969T3       | SNX21     | Sorting nexin-21                                      |
| 1.085           | 0.992        | 0.993        | 1.080        | 0.988        | 1.132        | 0.959        | 1.179        | 1.037        | 0.975         | 0.946         | 1.024         | A8MXB7       | SNX24     | Sorting nexin-24                                      |
| 1.011           | 0.992        | 1.019        | 1.005        | 0.918        | 1.001        | 0.999        | 1.060        | 0.987        | 1.041         | 0.975         | 1.044         | Q96L92       | SNX27     | Sorting nexin-27                                      |
| 0.934           | 1.022        | 1.015        | 1.013        | 0.975        | 0.959        | 0.984        | 0.933        | 1.002        | 1.004         | 0.913         | 1.085         | Q8TEQ0       | SNX29     | Sorting nexin-29                                      |
| 1.041           | 0.952        | 1.005        | 1.007        | 0.979        | 1.017        | 0.991        | 0.937        | 1.027        | 1.010         | 0.940         | 1.006         | O60493       | SNX3      | Sorting nexin-3                                       |
| 1.039           | 1.125        | 1.101        | 1.026        | 0.933        | 1.010        | 1.047        | 1.021        | 0.995        | 0.934         | 0.945         | 1.168         | Q5VWJ9       | SNX30     | Sorting nexin-30                                      |
| 1.011           | 0.907        | 1.030        | 1.237        | 0.850        | 1.223        | 1.054        | 1.007        | 1.084        | 0.993         | 0.927         | 1.106         | Q8WV41       | SNX33     | Sorting nexin-33                                      |
| 1.038           | 0.985        | 0.989        | 0.985        | 0.976        | 1.005        | 0.995        | 0.989        | 1.038        | 1.014         | 0.996         | 1.038         | O95219       | SNX4      | Sorting nexin-4                                       |
| 1.000           | 0.984        | 0.977        | 1.026        | 0.994        | 1.019        | 1.014        | 1.009        | 1.060        | 1.017         | 1.007         | 1.003         | Q9Y5X3       | SNX5      | Sorting nexin-5                                       |
| 1.010           | 1.010        | 1.032        | 0.986        | 0.958        | 1.015        | 0.971        | 1.087        | 1.008        | 0.938         | 1.011         | 0.985         | Q9Y5X2       | SNX8      | Sorting nexin-8                                       |
| 1.016           | 0.988        | 1.003        | 1.003        | 1.048        | 0.996        | 0.975        | 1.010        | 1.043        | 0.983         | 1.017         | 0.972         | Q9Y5X1       | SNX9      | Sorting nexin-9                                       |
| 1.053           | 0.969        | 0.990        | 1.078        | 1.008        | 1.028        | 1.021        | 1.106        | 1.084        | 1.080         | 1.069         | 1.015         | Q9BQ15       | NABP2     | SOSS complex subunit B1                               |
| 1.041           | 0.989        | 1.047        | 0.962        | 0.993        | 0.985        | 1.021        | 1.120        | 1.019        | 1.056         | 0.949         | 1.060         | Q9NRY2       | INIP      | SOSS complex subunit C                                |
| 1.101           | 1.025        | 1.046        | 1.058        | 1.025        | 1.040        | 1.031        | 0.992        | 1.026        | 1.005         | 1.009         | 1.080         | Q8N0X7       | SPG20     | Spartin                                               |
| 1.011           | 1.006        | 1.073        | 0.991        | 0.958        | 1.062        | 1.009        | 0.987        | 1.023        | 1.010         | 0.916         | 1.057         | Q9UBP0       | SPAST     | Spastin                                               |
| 0.995           | 1.005        | 0.991        | 0.987        | 0.947        | 1.049        | 0.996        | 1.056        | 1.035        | 0.980         | 1.028         | 1.037         | Q96JI7       | SPG11     | Spatacsin                                             |
| 0.956           | 1.038        | 0.924        | 1.090        | 0.920        | 0.942        | 0.935        | 0.966        | 0.964        | 0.969         | 1.023         | 1.040         | F5H0R1       | TUT1      | Speckle targeted PIP5K1A-regulated poly(A) polymerase |
|                 |              |              |              |              |              |              |              |              | 1.092         | 1.008         | 1.124         | A0A0D9SF54   | SPTAN1    | Spectrin alpha chain, non-erythrocytic 1              |

| Abundance Ratio |              |              |              |              |              |              |              |              |               |               |               | Accession ID | Gene name | Protein Description                                 |
|-----------------|--------------|--------------|--------------|--------------|--------------|--------------|--------------|--------------|---------------|---------------|---------------|--------------|-----------|-----------------------------------------------------|
| 1 d<br>M1/C1    | 1 d<br>M2/C2 | 1 d<br>M3/C3 | 4 d<br>M1/C1 | 4 d<br>M2/C2 | 4 d<br>M3/C3 | 7 d<br>M1/C1 | 7 d<br>M2/C2 | 7 d<br>M3/C3 | 10 d<br>M1/C1 | 10 d<br>M2/C2 | 10 d<br>M3/C3 |              |           |                                                     |
| 0.975           | 1.001        | 0.994        | 0.976        | 0.986        | 0.988        | 0.969        | 0.974        | 0.999        | 0.987         | 0.959         | 1.002         | Q13813       | SPTAN1    | Spectrin alpha chain, non-erythrocytic 1            |
| 1.311           | 1.105        | 1.112        | 0.999        | 1.164        | 1.013        | 1.042        | 1.034        | 0.959        |               |               |               | C9JY79       | SPTBN4    | Spectrin beta chain                                 |
| 0.967           | 1.002        | 1.007        | 0.980        | 0.984        | 0.986        | 0.975        | 0.954        | 0.993        | 0.990         | 0.974         | 1.018         | Q01082       | SPTBN1    | Spectrin beta chain, non-erythrocytic 1             |
| 1.251           | 1.023        | 0.957        | 0.986        | 0.994        | 1.101        | 0.868        | 0.877        | 1.081        | 1.187         | 1.127         | 1.231         | O15020       | SPTBN2    | Spectrin beta chain, non-erythrocytic 2             |
| 1.113           | 1.224        | 1.258        | 0.944        | 0.744        | 0.976        | 1.565        | 1.426        | 1.582        |               |               |               | Q15506       | SPA17     | Sperm surface protein Sp17                          |
| 1.028           | 0.918        | 1.062        | 0.970        | 0.946        | 1.001        | 0.966        | 0.952        | 1.055        | 0.921         | 0.924         | 1.059         | Q07617       | SPAG1     | Sperm-associated antigen 1                          |
| 1.048           | 1.044        | 0.897        | 0.844        | 1.004        | 0.968        | 1.035        | 0.912        | 0.955        | 0.993         | 0.976         | 1.038         | Q6Q759       | SPAG17    | Sperm-associated antigen 17                         |
| 0.969           | 1.034        | 1.109        | 1.051        | 0.737        | 0.914        | 0.895        | 0.863        | 1.011        | 1.213         | 0.965         | 1.087         | Q96R06       | SPAG5     | Sperm-associated antigen 5                          |
| 1.026           | 0.993        | 1.037        | 1.006        | 0.993        | 1.041        | 1.010        | 0.937        | 0.975        | 1.030         | 0.982         | 1.015         | O75391       | SPAG7     | Sperm-associated antigen 7                          |
| 1.028           | 1.015        | 1.001        | 0.999        | 0.984        | 0.988        | 1.052        | 1.013        | 1.012        | 1.009         | 1.034         | 1.037         | Q96SI9       | STRBP     | Spermatid perinuclear RNA-binding protein           |
|                 |              |              | 0.914        | 0.893        | 1.251        | 0.760        | 1.394        | 1.222        | 1.240         | 1.141         | 1.366         | Q9UM82       | SPATA2    | Spermatogenesis-associated protein 2                |
| 1.199           | 1.071        | 0.958        |              |              |              | 1.115        | 1.141        | 0.903        |               |               |               | J3KRC8       | SPATA33   | Spermatogenesis-associated protein 33 (Fragment)    |
| 1.021           | 0.993        | 0.986        | 1.006        | 0.977        | 1.004        | 0.981        | 1.035        | 0.984        | 0.979         | 0.997         | 1.008         | Q8NB90       | SPATA5    | Spermatogenesis-associated protein 5                |
| 1.029           | 0.982        | 1.037        | 1.007        | 1.023        | 1.022        | 1.017        | 1.059        | 1.052        | 0.951         | 0.971         | 1.036         | Q9BVQ7       | SPATA5L1  | Spermatogenesis-associated protein 5-like protein 1 |
| 1.031           | 1.024        | 1.013        | 1.007        | 1.042        | 1.001        | 1.060        | 0.966        | 0.976        | 1.136         | 1.030         | 1.119         | Q86XZ4       | SPATS2    | Spermatogenesis-associated serine-rich protein 2    |
| 1.018           | 1.008        | 0.971        | 1.026        | 1.001        | 0.999        | 0.996        | 1.082        | 1.036        | 1.032         | 1.019         | 1.003         | G3V4K3       | VIPAS39   | Spermatogenesis-defective protein 39 homolog        |
| 0.986           | 1.008        | 0.985        | 1.022        | 0.990        | 0.990        | 1.023        | 1.084        | 1.012        | 0.976         | 1.035         | 0.979         | P19623       | SRM       | Spermidine synthase                                 |
| 0.974           | 0.978        | 1.009        | 1.007        | 1.062        | 0.997        | 0.995        | 0.976        | 1.020        | 0.985         | 0.975         | 1.051         | P52788       | SMS       | Spermine synthase                                   |
| 0.986           | 0.969        | 1.021        | 1.027        | 0.976        | 1.012        | 1.056        | 0.967        | 0.980        | 1.084         | 0.987         | 1.115         | P28290       | SSFA2     | Sperm-specific antigen 2                            |
| 1.051           | 0.999        | 1.033        | 1.026        | 1.176        | 0.980        | 1.029        | 0.939        | 1.052        | 1.014         | 0.992         | 1.018         | P63208       | SKP1      | S-phase kinase-associated protein 1                 |
| 0.933           | 0.959        | 1.011        | 0.942        | 0.839        | 0.995        | 0.972        | 1.026        | 0.954        | 0.942         | 0.930         | 0.986         | O15121       | DEGS1     | Sphingolipid delta(4)-desaturase DES1               |
|                 |              |              | 0.811        | 0.690        | 1.190        |              |              |              | 0.934         | 1.061         | 0.921         | O60906       | SMPD2     | Sphingomyelin phosphodiesterase 2                   |
| 1.048           | 0.929        | 0.932        | 1.152        | 0.919        | 0.991        | 1.032        | 0.977        | 1.126        | 1.141         | 1.191         | 0.929         | P17405       | SMPD1     | Sphingomyelin phosphodiesterase                     |
| 0.985           | 1.006        | 0.979        | 1.001        | 0.936        | 0.997        | 1.036        | 1.095        | 0.985        | 1.014         | 1.024         | 0.989         | O95470       | SGPL1     | Sphingosine-1-phosphate lyase 1                     |
| 0.958           | 0.968        | 1.030        | 0.915        | 1.031        | 1.112        | 1.062        | 0.914        | 0.997        | 0.971         | 1.036         | 0.950         | Q9BX95       | SGPP1     | Sphingosine-1-phosphate phosphatase 1               |
|                 |              |              | 0.870        | 0.805        | 1.077        |              |              |              |               |               |               | Q8N0Z3       | SPICE1    | Spindle and centriole-associated protein 1          |
| 0.972           | 1.013        | 1.002        | 1.026        | 0.878        | 0.944        | 1.145        | 1.009        | 1.001        |               |               |               | Q96BD8       | SKA1      | Spindle and kinetochore-associated protein 1        |
| 0.990           | 1.026        | 1.014        |              |              |              |              |              |              |               |               |               | Q8WVK7       | SKA2      | Spindle and kinetochore-associated protein 2        |
| 0.919           | 0.868        | 0.944        | 0.882        | 1.075        | 0.698        |              |              |              |               |               |               | Q8IX90       | SKA3      | Spindle and kinetochore-associated protein 3        |
| 1.017           | 0.900        | 0.913        |              |              |              |              |              |              |               |               |               | Q6UVJ0       | SASS6     | Spindle assembly abnormal protein 6 homolog         |
| 1.002           | 1.030        | 0.993        | 0.979        | 0.985        | 1.010        | 1.005        | 1.095        | 1.021        | 1.014         | 0.952         | 1.106         | Q9Y657       | SPIN1     | Spindlin-1                                          |
|                 |              |              |              |              |              |              |              |              | 0.931         | 0.909         | 0.950         | F6R6M7       | DDX39B    | Spliceosome RNA helicase DDX39B (Fragment)          |
| 0.943           | 0.837        | 0.962        |              |              |              |              |              |              |               |               |               | F6WLT2       | DDX39B    | Spliceosome RNA helicase DDX39B (Fragment)          |



| Abundance Ratio |              |              |              |              |              |              |              |              |               |               |               | Accession ID | Gene name | Protein Description                                                |
|-----------------|--------------|--------------|--------------|--------------|--------------|--------------|--------------|--------------|---------------|---------------|---------------|--------------|-----------|--------------------------------------------------------------------|
| 1 d<br>M1/C1    | 1 d<br>M2/C2 | 1 d<br>M3/C3 | 4 d<br>M1/C1 | 4 d<br>M2/C2 | 4 d<br>M3/C3 | 7 d<br>M1/C1 | 7 d<br>M2/C2 | 7 d<br>M3/C3 | 10 d<br>M1/C1 | 10 d<br>M2/C2 | 10 d<br>M3/C3 |              |           |                                                                    |
| 0.998           | 1.013        | 1.004        | 1.019        | 1.036        | 1.013        | 0.971        | 1.006        | 0.986        | 0.989         | 1.020         | 0.958         | Q13838       | DDX39B    | Spliceosome RNA helicase DDX39B                                    |
| 1.051           | 0.921        | 0.979        | 1.017        | 0.897        | 0.994        | 1.064        | 0.796        | 1.009        | 1.025         | 0.984         | 1.054         | Q9P013       | CWC15     | Spliceosome-associated protein CWC15 homolog                       |
| 1.058           | 1.086        | 1.031        | 1.027        | 0.970        | 1.014        | 1.078        | 0.999        | 0.965        | 1.078         | 1.121         | 1.141         | H7CON4       | SF1       | Splicing factor 1 (Fragment)                                       |
| 0.990           | 1.008        | 0.992        | 0.985        | 0.979        | 1.011        | 1.004        | 1.020        | 0.986        | 1.005         | 1.020         | 1.021         | Q15459       | SF3A1     | Splicing factor 3A subunit 1                                       |
| 0.967           | 1.005        | 0.983        | 0.978        | 0.972        | 0.994        | 0.985        | 1.022        | 0.981        | 1.031         | 1.014         | 1.053         | Q15428       | SF3A2     | Splicing factor 3A subunit 2                                       |
| 1.018           | 1.013        | 0.985        | 0.989        | 1.047        | 0.997        | 0.974        | 0.974        | 1.023        | 0.952         | 1.029         | 0.985         | Q12874       | SF3A3     | Splicing factor 3A subunit 3                                       |
| 1.004           | 1.018        | 1.007        | 0.994        | 0.952        | 0.992        | 0.999        | 1.045        | 0.990        | 0.987         | 1.034         | 1.001         | O75533       | SF3B1     | Splicing factor 3B subunit 1                                       |
| 1.421           | 1.404        | 1.152        |              |              |              |              |              |              |               |               |               | H0YCG1       | SF3B2     | Splicing factor 3B subunit 2 (Fragment)                            |
| 0.962           | 0.978        | 0.984        | 0.974        | 0.979        | 0.993        | 0.978        | 0.972        | 0.981        | 1.008         | 1.025         | 1.022         | Q13435       | SF3B2     | Splicing factor 3B subunit 2                                       |
| 1.006           | 0.998        | 1.003        | 0.991        | 0.974        | 0.980        | 0.982        | 1.040        | 0.987        | 0.964         | 1.006         | 0.965         | Q15393       | SF3B3     | Splicing factor 3B subunit 3                                       |
| 1.009           | 1.060        | 0.981        | 0.996        | 0.973        | 0.990        | 0.986        | 1.102        | 1.012        | 0.968         | 1.052         | 0.976         | Q15427       | SF3B4     | Splicing factor 3B subunit 4                                       |
| 1.001           | 0.991        | 0.980        | 0.995        | 1.053        | 0.999        | 0.971        | 1.013        | 1.000        | 1.018         | 1.024         | 1.027         | Q9BWJ5       | SF3B5     | Splicing factor 3B subunit 5                                       |
| 0.944           | 0.988        | 0.976        | 0.992        | 0.995        | 1.030        | 0.998        | 1.053        | 1.017        | 1.032         | 1.008         | 1.028         | Q9Y3B4       | SF3B6     | Splicing factor 3B subunit 6                                       |
| 1.008           | 0.978        | 1.008        | 0.962        | 0.992        | 0.986        | 1.012        | 0.985        | 1.004        | 1.016         | 0.963         | 1.052         | Q96I25       | RBM17     | Splicing factor 45                                                 |
| 1.222           | 1.011        | 1.035        | 1.052        | 1.462        | 0.939        | 1.074        | 0.851        | 1.027        | 0.927         | 0.988         | 0.889         | Q01081       | U2AF1     | Splicing factor U2AF 35 kDa subunit                                |
| 0.986           | 0.980        | 0.995        | 0.982        | 1.021        | 0.975        | 0.958        | 0.995        | 1.013        | 0.952         | 1.028         | 0.984         | P26368       | U2AF2     | Splicing factor U2AF 65 kDa subunit                                |
| 1.009           | 0.976        | 1.026        | 0.967        | 0.959        | 1.007        | 0.943        | 0.845        | 0.982        | 1.007         | 1.046         | 1.051         | O95104       | SCAF4     | Splicing factor, arginine/serine-rich 15                           |
| 0.916           | 0.998        | 1.011        | 0.990        | 0.979        | 1.060        | 0.936        | 0.975        | 1.032        | 1.017         | 1.007         | 1.084         | Q9H7N4       | SCAF1     | Splicing factor, arginine/serine-rich 19                           |
| 0.949           | 0.996        | 0.960        | 0.977        | 0.990        | 0.989        | 0.992        | 0.982        | 0.980        | 1.015         | 1.005         | 0.999         | P23246       | SFPQ      | Splicing factor, proline- and glutamine-rich                       |
|                 |              |              |              |              |              |              |              |              | 1.008         | 0.841         | 1.008         | P57052       | RBM11     | Splicing regulator RBM11                                           |
| 1.053           | 0.893        | 1.109        |              |              |              |              |              |              |               |               |               | Q7Z699       | SPRED1    | Sprouty-related, EVH1 domain-containing protein 1                  |
| 1.035           | 0.792        | 1.135        |              |              |              |              |              |              |               |               |               | F8VWW7       | SPRYD3    | SPRY domain-containing protein 3                                   |
| 0.983           | 0.961        | 0.995        | 1.012        | 0.996        | 1.008        | 1.030        | 1.035        | 1.009        | 1.057         | 0.985         | 1.013         | Q8WW59       | SPRYD4    | SPRY domain-containing protein 4                                   |
| 1.107           | 1.045        | 1.051        | 0.964        | 1.026        | 1.014        | 1.022        | 1.103        | 1.028        | 1.029         | 1.020         | 0.993         | Q5W111       | SPRYD7    | SPRY domain-containing protein 7                                   |
| 0.945           | 0.968        | 1.074        | 0.997        | 0.918        | 0.977        | 1.024        | 1.108        | 1.001        | 1.012         | 0.992         | 1.020         | Q14534       | SQLE      | Squalene monooxygenase                                             |
| 0.893           | 1.031        | 1.042        | 0.941        | 0.873        | 0.937        | 1.086        | 1.050        | 1.144        | 1.030         | 1.121         | 1.065         | P37268       | FDFT1     | Squalene synthase                                                  |
|                 |              |              |              |              |              | 1.079        | 0.976        | 1.019        | 0.980         | 1.032         | 1.258         | F8VV04       | SART3     | Squamous cell carcinoma antigen recognized by T-cells 3 (Fragment) |
| 1.010           | 1.004        | 1.034        | 1.014        | 1.092        | 1.026        | 1.003        | 0.962        | 1.007        | 1.003         | 1.010         | 1.005         | Q15020       | SART3     | Squamous cell carcinoma antigen recognized by T-cells 3            |
| 1.037           | 0.988        | 1.024        | 1.015        | 1.089        | 0.937        | 0.988        | 0.946        | 1.008        | 0.992         | 1.011         | 0.983         | Q9GZT3       | SLIRP     | SRA stem-loop-interacting RNA-binding protein, mitochondrial       |
| 0.980           | 1.010        | 0.979        | 0.986        | 1.013        | 0.979        | 0.980        | 0.928        | 0.977        | 1.043         | 1.012         | 1.031         | Q14247       | CTTN      | Src substrate cortactin                                            |
| 1.031           | 1.030        | 1.040        | 0.992        | 1.011        | 1.038        | 0.969        | 1.088        | 1.052        | 0.927         | 0.987         | 0.975         | Q96SB4       | SRPK1     | SRSF protein kinase 1                                              |

| Abundance Ratio |              |              |              |              |              |              |              |              |               |               |               | Accession ID | Gene name | Protein Description                                                   |
|-----------------|--------------|--------------|--------------|--------------|--------------|--------------|--------------|--------------|---------------|---------------|---------------|--------------|-----------|-----------------------------------------------------------------------|
| 1 d<br>M1/C1    | 1 d<br>M2/C2 | 1 d<br>M3/C3 | 4 d<br>M1/C1 | 4 d<br>M2/C2 | 4 d<br>M3/C3 | 7 d<br>M1/C1 | 7 d<br>M2/C2 | 7 d<br>M3/C3 | 10 d<br>M1/C1 | 10 d<br>M2/C2 | 10 d<br>M3/C3 |              |           |                                                                       |
| 0.921           | 0.979        | 1.011        | 0.952        | 0.921        | 1.199        | 1.083        | 1.117        | 1.109        |               |               |               | Q9NY15       | STAB1     | Stabilin-1                                                            |
| 1.068           | 1.100        | 1.087        | 1.046        | 0.901        | 0.969        | 1.085        | 1.098        | 0.897        | 1.050         | 0.944         | 0.999         | O94864       | SUPT7L    | STAGA complex 65 subunit gamma                                        |
| 1.042           | 1.013        | 0.990        | 1.063        | 1.035        | 1.007        | 1.004        | 1.007        | 1.054        | 1.063         | 1.010         | 1.028         | O95630       | STAMBP    | STAM-binding protein                                                  |
| 1.086           | 0.974        | 0.919        | 0.930        | 0.883        | 1.024        | 1.051        | 1.088        | 0.864        | 0.958         | 0.923         | 1.000         | O76061       | STC2      | Stanniocalcin-2                                                       |
| 0.986           | 0.998        | 0.989        | 1.006        | 1.016        | 0.985        | 1.007        | 1.015        | 1.010        | 1.020         | 1.005         | 1.019         | Q7KZF4       | SND1      | Staphylococcal nuclease domain-containing protein 1                   |
| 1.019           | 1.023        | 0.926        | 0.969        | 0.936        | 0.926        | 1.034        | 1.170        | 0.999        | 1.018         | 0.993         | 1.042         | O95210       | STBD1     | Starch-binding domain-containing protein 1                            |
| 0.926           | 0.989        | 0.977        | 1.057        | 1.253        | 0.997        | 1.125        | 0.996        | 1.010        | 1.012         | 0.967         | 1.141         | Q9Y3M8       | STARD13   | StAR-related lipid transfer protein 13                                |
|                 |              |              | 0.975        | 1.016        | 1.001        |              |              |              | 1.040         | 1.109         | 1.029         | J3QLM1       | STARD3    | StAR-related lipid transfer protein 3                                 |
|                 |              |              | 1.190        | 0.873        | 1.065        | 1.080        | 1.131        | 1.045        | 1.000         | 0.974         | 1.034         | Q96DR4       | STARD4    | StAR-related lipid transfer protein 4                                 |
|                 |              |              |              |              |              | 0.976        | 1.171        | 1.028        | 0.835         | 0.899         | 1.179         | Q9NSY2       | STARD5    | StAR-related lipid transfer protein 5                                 |
| 1.027           | 1.024        | 0.985        | 0.974        | 0.945        | 0.974        | 1.009        | 0.943        | 0.951        | 0.886         | 0.852         | 1.016         | Q9NQZ5       | STARD7    | StAR-related lipid transfer protein 7, mitochondrial                  |
| 0.986           | 0.977        | 0.980        | 0.949        | 0.939        | 0.968        | 0.967        | 0.877        | 0.954        | 0.957         | 0.911         | 0.983         | P16949       | STMN1     | Stathmin                                                              |
| 0.999           | 0.965        | 1.001        | 0.970        | 0.967        | 1.084        | 0.998        | 0.822        | 0.974        | 1.134         | 1.028         | 1.122         | A0A0J9YW36   | STMN3     | Stathmin-3 (Fragment)                                                 |
| 1.002           | 0.958        | 0.985        | 0.954        | 0.960        | 1.007        | 0.966        | 0.980        | 1.013        | 0.999         | 0.985         | 1.083         | Q9UEW8       | STK39     | STE20/SPS1-related proline-alanine-rich protein kinase                |
| 1.077           | 1.037        | 1.064        | 1.052        | 0.977        | 1.012        | 1.072        | 1.094        | 1.041        | 1.126         | 1.074         | 1.058         | Q7RTN6       | STRADA    | STE20-related kinase adapter protein alpha                            |
|                 |              |              | 0.939        | 0.597        | 2.165        |              |              |              |               |               |               | Q7RTU9       | STRC      | Stereocilin                                                           |
| 1.087           | 0.983        | 1.015        | 0.991        | 1.216        | 1.136        | 0.904        | 1.189        | 1.063        | 0.988         | 0.986         | 1.166         | Q6SZW1       | SARM1     | Sterile alpha and TIR motif-containing protein 1                      |
| 1.336           | 1.198        | 1.070        | 0.937        | 0.856        | 0.891        |              |              |              |               |               |               | Q5K651       | SAMD9     | Sterile alpha motif domain-containing protein 9                       |
|                 |              |              | 1.258        | 0.577        | 1.036        | 0.971        | 1.150        | 0.961        | 1.013         | 1.045         | 0.830         | P11474       | ESRRA     | Steroid hormone receptor ERR1                                         |
| 1.038           | 1.018        | 1.009        | 0.966        | 0.959        | 1.062        | 0.975        | 1.030        | 1.013        | 1.030         | 1.071         | 1.116         | Q9HD15       | SRA1      | Steroid receptor RNA activator 1                                      |
| 0.978           | 0.974        | 0.982        | 0.897        | 0.903        | 0.897        | 0.998        | 0.921        | 0.936        | 1.024         | 0.868         | 1.077         | Q02318       | CYP27A1   | Sterol 26-hydroxylase, mitochondrial                                  |
| 0.958           | 1.023        | 0.979        | 0.968        | 0.904        | 1.009        | 0.995        | 1.009        | 0.974        | 1.040         | 0.981         | 1.009         | P35610       | SOAT1     | Sterol O-acyltransferase 1                                            |
| 0.984           | 0.884        | 1.064        | 0.967        | 0.965        | 1.028        | 0.872        | 0.514        | 0.818        | 1.308         | 1.056         | 1.273         | Q12770       | SCAP      | Sterol regulatory element-binding protein cleavage-activating protein |
| 0.937           | 1.000        | 0.999        | 0.982        | 0.984        | 0.993        | 1.035        | 1.033        | 1.040        | 1.030         | 1.020         | 1.056         | Q15738       | NSDHL     | Sterol-4-alpha-carboxylate 3-dehydrogenase, decarboxylating           |
| 1.032           | 0.974        | 1.012        | 0.976        | 0.945        | 1.001        | 1.052        | 1.073        | 1.044        | 1.020         | 1.007         | 1.067         | G0XQ39       | STIM1     | STIM1L                                                                |
| 1.026           | 0.994        | 1.019        | 0.994        | 0.963        | 1.025        | 1.001        | 1.013        | 0.998        | 1.015         | 0.994         | 1.008         | Q9UJZ1       | STOML2    | Stomatin-like protein 2, mitochondrial                                |
| 0.996           | 1.005        | 1.005        | 0.982        | 0.983        | 0.968        | 0.967        | 0.955        | 0.955        | 0.961         | 1.001         | 0.967         | P38646       | HSPA9     | Stress-70 protein, mitochondrial                                      |
| 0.976           | 0.989        | 0.996        | 1.011        | 0.983        | 1.018        | 1.018        | 1.051        | 0.985        | 0.985         | 0.997         | 1.006         | O43815       | STRN      | Striatin                                                              |
| 0.914           | 1.121        | 1.008        |              |              |              |              |              |              | 0.675         | 0.757         | 0.922         | H0YJT2       | STRN3     | Striatin-3 (Fragment)                                                 |
| 0.968           | 0.962        | 0.984        | 1.039        | 0.999        | 1.052        | 0.996        | 1.011        | 1.028        | 1.027         | 1.052         | 1.023         | Q13033       | STRN3     | Striatin-3                                                            |
| 1.014           | 1.025        | 0.992        | 1.020        | 0.961        | 1.032        | 1.031        | 1.093        | 1.008        | 1.017         | 0.993         | 1.008         | Q5VSL9       | STRIP1    | Striatin-interacting protein 1                                        |

| Abundance Ratio |              |              |              |              |              |              |              |              |               |               |               | Accession ID | Gene name | Protein Description                                                                |
|-----------------|--------------|--------------|--------------|--------------|--------------|--------------|--------------|--------------|---------------|---------------|---------------|--------------|-----------|------------------------------------------------------------------------------------|
| 1 d<br>M1/C1    | 1 d<br>M2/C2 | 1 d<br>M3/C3 | 4 d<br>M1/C1 | 4 d<br>M2/C2 | 4 d<br>M3/C3 | 7 d<br>M1/C1 | 7 d<br>M2/C2 | 7 d<br>M3/C3 | 10 d<br>M1/C1 | 10 d<br>M2/C2 | 10 d<br>M3/C3 |              |           |                                                                                    |
| 1.055           | 0.939        | 0.993        | 0.897        | 1.005        | 0.992        | 0.971        | 0.797        | 0.940        | 0.971         | 1.063         | 1.072         | Q99470       | SDF2      | Stromal cell-derived factor 2                                                      |
| 1.002           | 1.015        | 1.031        | 0.996        | 0.941        | 0.996        | 0.983        | 0.939        | 1.022        | 1.017         | 0.995         | 1.008         | Q9HCN8       | SDF2L1    | Stromal cell-derived factor 2-like protein 1                                       |
| 1.064           | 1.011        | 1.106        | 0.997        | 0.928        | 0.975        | 1.123        | 1.036        | 1.050        | 1.040         | 1.025         | 1.062         | Q8WU79       | SMAP2     | Stromal membrane-associated protein 2                                              |
| 1.020           | 1.016        | 1.007        | 1.007        | 0.975        | 1.005        | 1.020        | 1.048        | 0.998        | 1.007         | 1.003         | 1.028         | A6NHR9       | SMCHD1    | Structural maintenance of chromosomes flexible hinge domain-containing protein 1   |
| 0.975           | 0.997        | 0.991        | 0.981        | 0.975        | 1.011        | 0.992        | 0.958        | 0.974        | 1.017         | 0.994         | 1.034         | Q14683       | SMC1A     | Structural maintenance of chromosomes protein 1A                                   |
| 0.964           | 0.990        | 1.000        | 0.982        | 0.952        | 0.987        | 1.026        | 1.016        | 0.994        | 0.951         | 0.927         | 1.071         | O95347       | SMC2      | Structural maintenance of chromosomes protein 2                                    |
| 0.995           | 1.002        | 0.995        | 0.989        | 0.975        | 1.005        | 0.995        | 0.975        | 0.992        | 0.991         | 0.977         | 1.019         | Q9UQE7       | SMC3      | Structural maintenance of chromosomes protein 3                                    |
| 0.950           | 0.985        | 1.016        | 0.982        | 0.974        | 1.000        | 1.016        | 1.029        | 1.010        | 0.969         | 0.938         | 1.087         | Q9NTJ3       | SMC4      | Structural maintenance of chromosomes protein 4                                    |
| 1.007           | 1.017        | 1.035        | 1.014        | 0.941        | 1.063        | 1.043        | 1.045        | 0.986        | 1.009         | 1.050         | 1.048         | Q8IY18       | SMC5      | Structural maintenance of chromosomes protein 5                                    |
| 0.866           | 0.961        | 0.932        | 1.006        | 1.001        | 1.042        | 1.066        | 1.058        | 1.120        | 1.052         | 0.980         | 0.944         | O14521       | SDHD      | Succinate dehydrogenase [ubiquinone] cytochrome b small subunit, mitochondrial     |
| 0.991           | 1.014        | 0.974        | 1.029        | 1.083        | 0.997        | 1.055        | 0.970        | 1.037        | 1.056         | 1.013         | 1.030         | P31040       | SDHA      | Succinate dehydrogenase [ubiquinone] flavoprotein subunit, mitochondrial           |
| 1.172           | 0.830        | 1.055        | 1.389        | 0.859        | 1.114        | 1.294        | 0.879        | 1.082        | 1.300         | 0.792         | 1.108         | A0A087WWT1   | SDHB      | Succinate dehydrogenase [ubiquinone] iron-sulfur subunit, mitochondrial (Fragment) |
| 1.041           | 1.024        | 1.014        | 1.062        | 1.058        | 1.006        | 1.059        | 1.011        | 1.024        | 1.039         | 1.046         | 0.987         | P21912       | SDHB      | Succinate dehydrogenase [ubiquinone] iron-sulfur subunit, mitochondrial            |
| 0.802           | 0.835        | 0.856        | 0.889        | 0.913        | 0.976        | 0.852        | 0.744        | 0.890        | 0.974         | 0.968         | 1.205         | Q9NX18       | SDHAF2    | Succinate dehydrogenase assembly factor 2, mitochondrial                           |
| 1.130           | 0.925        | 0.834        | 0.970        | 1.036        | 1.015        | 0.837        | 0.705        | 1.091        | 1.239         | 0.980         | 1.140         | Q9NRP4       | SDHAF3    | Succinate dehydrogenase assembly factor 3, mitochondrial                           |
| 1.002           | 0.965        | 1.020        | 0.964        | 0.927        | 0.963        | 0.901        | 0.869        | 0.902        | 1.010         | 0.995         | 0.966         | Q5VUM1       | SDHAF4    | Succinate dehydrogenase assembly factor 4, mitochondrial                           |
| 0.954           | 0.997        | 0.973        | 0.978        | 0.879        | 1.095        | 1.093        | 1.136        | 1.074        | 1.168         | 1.130         | 1.027         | Q99643       | SDHC      | Succinate dehydrogenase cytochrome b560 subunit, mitochondrial                     |
| 1.031           | 1.015        | 0.939        | 0.990        | 1.111        | 0.964        | 0.995        | 0.978        | 1.000        | 1.023         | 0.982         | 0.976         | P53597       | SUCLG1    | Succinate--CoA ligase [ADP/GDP-forming] subunit alpha, mitochondrial               |
| 1.030           | 1.060        | 1.067        | 0.986        | 0.968        | 1.000        | 0.994        | 0.990        | 0.988        | 1.011         | 0.964         | 1.007         | Q9P2R7       | SUCLA2    | Succinate--CoA ligase [ADP-forming] subunit beta, mitochondrial                    |
| 0.982           | 0.987        | 0.985        | 0.971        | 0.989        | 0.990        | 1.000        | 0.987        | 0.988        | 0.994         | 0.994         | 0.980         | Q96I99       | SUCLG2    | Succinate--CoA ligase [GDP-forming] subunit beta, mitochondrial                    |
| 0.988           | 1.006        | 1.016        | 1.003        | 1.022        | 1.026        | 1.011        | 1.015        | 1.042        | 1.000         | 1.004         | 0.972         | P55809       | OXCT1     | Succinyl-CoA:3-ketoacid coenzyme A transferase 1, mitochondrial                    |
|                 |              |              | 0.972        | 0.688        | 1.084        | 1.287        | 1.116        | 0.977        |               |               |               | Q8NCC5       | SLC37A3   | Sugar phosphate exchanger 3                                                        |

| Abundance Ratio |              |              |              |              |              |              |              |              |               |               |               | Accession ID | Gene name | Protein Description                                 |
|-----------------|--------------|--------------|--------------|--------------|--------------|--------------|--------------|--------------|---------------|---------------|---------------|--------------|-----------|-----------------------------------------------------|
| 1 d<br>M1/C1    | 1 d<br>M2/C2 | 1 d<br>M3/C3 | 4 d<br>M1/C1 | 4 d<br>M2/C2 | 4 d<br>M3/C3 | 7 d<br>M1/C1 | 7 d<br>M2/C2 | 7 d<br>M3/C3 | 10 d<br>M1/C1 | 10 d<br>M2/C2 | 10 d<br>M3/C3 |              |           |                                                     |
| 1.024           | 0.954        | 0.984        | 0.917        | 0.884        | 0.951        | 0.866        | 0.783        | 0.942        | 1.065         | 0.916         | 0.972         | Q8NBK3       | SUMF1     | Sulfatase-modifying factor 1                        |
| 1.031           | 0.990        | 0.978        | 0.982        | 1.017        | 1.031        | 1.023        | 1.042        | 1.039        | 1.092         | 1.043         | 1.049         | J3KQJ1       | SUMF2     | Sulfatase-modifying factor 2                        |
| 0.997           | 0.985        | 0.988        | 1.038        | 0.886        | 1.031        | 1.099        | 1.095        | 1.064        | 1.128         | 1.056         | 1.079         | P50443       | SLC26A2   | Sulfate transporter                                 |
| 0.963           | 1.024        | 0.973        |              |              |              |              |              |              |               |               |               | O00391       | QSOX1     | Sulfhydryl oxidase 1                                |
| 0.972           | 1.014        | 1.026        | 0.996        | 0.968        | 1.019        | 0.996        | 1.072        | 1.028        | 0.984         | 1.024         | 1.025         | Q6ZRP7       | QSOX2     | Sulfhydryl oxidase 2                                |
| 1.102           | 1.025        | 1.019        | 1.036        | 1.104        | 0.987        | 1.024        | 1.031        | 1.044        | 1.005         | 1.004         | 0.971         | Q9Y6N5       | SQRDL     | Sulfide:quinone oxidoreductase, mitochondrial       |
| 1.062           | 1.019        | 1.011        | 1.037        | 1.045        | 1.048        | 0.984        | 1.026        | 1.006        | 0.901         | 1.041         | 0.970         | Q9BYN0       | SRXN1     | Sulfiredoxin-1                                      |
| 1.007           | 0.980        | 1.001        | 0.951        | 0.963        | 1.024        | 0.997        | 0.860        | 0.955        | 1.093         | 1.001         | 1.108         | P51687       | SUOX      | Sulfite oxidase, mitochondrial                      |
| 1.027           | 0.877        | 1.017        |              |              |              |              |              |              |               |               |               | M0R286       | SAE1      | SUMO-activating enzyme subunit 1 (Fragment)         |
| 0.995           | 1.002        | 0.989        | 0.992        | 1.008        | 1.006        | 0.998        | 1.026        | 1.009        | 0.981         | 1.012         | 0.971         | Q9UBE0       | SAE1      | SUMO-activating enzyme subunit 1                    |
| 1.006           | 0.987        | 0.997        | 0.991        | 0.993        | 1.027        | 0.990        | 0.988        | 1.019        | 0.995         | 1.030         | 0.991         | Q9UBT2       | UBA2      | SUMO-activating enzyme subunit 2                    |
| 1.002           | 1.005        | 0.972        | 1.003        | 1.007        | 0.983        | 0.984        | 1.073        | 0.994        | 0.991         | 0.990         | 0.980         | P63279       | UBE2I     | SUMO-conjugating enzyme UBC9                        |
| 0.973           | 0.985        | 1.010        | 0.952        | 0.926        | 1.000        | 0.986        | 0.954        | 0.997        | 1.031         | 0.996         | 0.976         | Q9UH99       | SUN2      | SUN domain-containing protein 2                     |
| 0.996           | 0.998        | 1.009        | 0.995        | 0.993        | 1.020        | 0.973        | 0.970        | 1.008        | 0.952         | 0.986         | 1.009         | P42285       | SKIV2L2   | Superkiller viralicidic activity 2-like 2           |
|                 |              |              |              |              |              |              |              |              | 0.961         | 0.836         | 1.026         | F5H3C5       | SOD2      | Superoxide dismutase (Fragment)                     |
| 1.056           | 1.003        | 1.019        | 0.979        | 0.968        | 1.008        | 0.927        | 0.840        | 0.965        | 0.984         | 0.983         | 0.952         | P00441       | SOD1      | Superoxide dismutase [Cu-Zn]                        |
| 1.128           | 1.105        | 1.104        | 1.157        | 1.095        | 1.085        | 1.091        | 1.109        | 1.082        | 1.156         | 0.976         | 1.096         | P04179       | SOD2      | Superoxide dismutase [Mn], mitochondrial            |
| 1.045           | 0.957        | 1.090        | 0.972        | 0.915        | 1.077        |              |              |              |               |               |               | Q86UD0       | SAPCD2    | Suppressor APC domain-containing protein 2          |
| 1.076           | 1.070        | 1.016        |              |              |              | 0.979        | 0.832        | 1.012        | 1.031         | 0.968         | 0.989         | O14508       | SOCS2     | Suppressor of cytokine signaling 2                  |
| 1.015           | 1.106        | 1.006        |              |              |              |              |              |              | 0.913         | 0.988         | 0.967         | O14544       | SOCS6     | Suppressor of cytokine signaling 6                  |
|                 |              |              | 0.916        | 0.951        | 0.900        |              |              |              |               |               |               | Q6UWP8       | SBSN      | Suprabasin                                          |
| 0.947           | 0.978        | 1.003        | 1.015        | 0.972        | 1.024        | 1.055        | 0.999        | 0.998        | 1.068         | 0.985         | 1.065         | Q15526       | SURF1     | Surfeit locus protein 1                             |
| 1.057           | 0.901        | 0.903        | 0.945        | 1.013        | 1.174        | 1.152        | 1.070        | 1.046        | 1.064         | 1.020         | 1.235         | Q15527       | SURF2     | Surfeit locus protein 2                             |
| 0.900           | 1.029        | 0.939        | 0.971        | 0.925        | 1.067        | 1.054        | 1.177        | 1.027        | 1.269         | 1.064         | 1.149         | O15260       | SURF4     | Surfeit locus protein 4                             |
| 1.013           | 1.026        | 1.043        | 0.987        | 1.000        | 1.033        | 1.018        | 1.043        | 1.021        | 1.059         | 1.030         | 1.115         | O75683       | SURF6     | Surfeit locus protein 6                             |
| 1.026           | 0.980        | 1.029        | 1.053        | 0.928        | 1.007        | 1.047        | 1.033        | 1.052        | 1.053         | 1.057         | 1.060         | Q8IWZ8       | SUGP1     | SURP and G-patch domain-containing protein 1        |
| 0.959           | 0.981        | 0.977        | 0.960        | 0.946        | 0.998        | 1.019        | 1.016        | 1.050        | 0.995         | 0.954         | 1.056         | M0R229       | SUGP2     | SURP and G-patch domain-containing protein 2        |
| 0.987           | 0.974        | 0.981        | 0.989        | 0.922        | 0.953        | 0.930        | 1.002        | 0.987        | 0.965         | 1.002         | 0.942         | E7EQZ4       | SMN1      | Survival motor neuron protein                       |
| 1.032           | 0.996        | 0.996        | 0.983        | 1.001        | 1.009        | 0.976        | 1.023        | 0.973        | 0.956         | 1.023         | 1.032         | O75940       | SMNDC1    | Survival of motor neuron-related-splicing factor 30 |
| 1.020           | 0.884        | 1.253        | 1.202        | 1.035        | 0.960        | 1.148        | 1.050        | 1.076        | 1.302         | 1.070         | 1.129         | Q9UGT4       | SUSD2     | Sushi domain-containing protein 2                   |
| 0.977           | 0.968        | 1.012        | 0.990        | 0.875        | 1.011        | 1.007        | 1.122        | 1.022        | 1.129         | 0.999         | 0.946         | P78539       | SRPX      | Sushi repeat-containing protein SRPX                |
| 0.999           | 0.981        | 0.953        | 1.025        | 0.957        | 1.062        | 1.041        | 0.970        | 1.041        | 1.203         | 1.050         | 1.175         | Q7Z422       | SZRD1     | SUZ domain-containing protein 1                     |
| 0.988           | 0.972        | 1.020        | 1.001        | 0.955        | 1.015        | 1.033        | 0.985        | 1.017        | 1.034         | 1.087         | 1.049         | Q92922       | SMARCC1   | SWI/SNF complex subunit SMARCC1                     |

| Abundance Ratio |              |              |              |              |              |              |              |              |               |               |               | Accession ID | Gene name | Protein Description                                                                                              |
|-----------------|--------------|--------------|--------------|--------------|--------------|--------------|--------------|--------------|---------------|---------------|---------------|--------------|-----------|------------------------------------------------------------------------------------------------------------------|
| 1 d<br>M1/C1    | 1 d<br>M2/C2 | 1 d<br>M3/C3 | 4 d<br>M1/C1 | 4 d<br>M2/C2 | 4 d<br>M3/C3 | 7 d<br>M1/C1 | 7 d<br>M2/C2 | 7 d<br>M3/C3 | 10 d<br>M1/C1 | 10 d<br>M2/C2 | 10 d<br>M3/C3 |              |           |                                                                                                                  |
| 0.964           | 1.003        | 1.023        | 1.145        | 0.975        | 0.966        | 0.964        | 1.031        | 0.995        | 0.922         | 1.011         | 0.933         | Q8TAQ2       | SMARCC2   | SWI/SNF complex subunit SMARCC2                                                                                  |
| 0.953           | 0.995        | 0.982        | 0.977        | 0.966        | 1.009        | 0.956        | 0.909        | 0.984        | 1.009         | 0.979         | 1.054         | F8VXC8       | SMARCC2   | SWI/SNF complex subunit SMARCC2                                                                                  |
| 0.992           | 0.977        | 1.009        | 0.975        | 0.949        | 0.967        | 1.015        | 1.052        | 0.972        | 0.955         | 0.991         | 1.022         | G5E975       | SMARCB1   | SWI/SNF related, matrix associated, actin dependent regulator of chromatin, subfamily b, member 1, isoform CRA c |
| 1.000           | 0.999        | 1.005        | 0.990        | 1.026        | 0.993        | 1.020        | 1.008        | 1.012        | 0.976         | 0.979         | 1.018         | O60264       | SMARCA5   | SWI/SNF-related matrix-associated actin-dependent regulator of chromatin subfamily A member 5                    |
| 0.990           | 0.957        | 1.068        | 0.983        | 0.905        | 1.075        | 1.045        | 1.058        | 1.031        | 0.976         | 0.969         | 0.974         | Q9NZC9       | SMARCAL1  | SWI/SNF-related matrix-associated actin-dependent regulator of chromatin subfamily A-like protein 1              |
| 1.014           | 1.064        | 1.006        | 0.982        | 0.951        | 0.981        | 1.017        | 1.079        | 1.005        | 1.032         | 1.041         | 1.016         | Q96GM5       | SMARCD1   | SWI/SNF-related matrix-associated actin-dependent regulator of chromatin subfamily D member 1                    |
| 1.012           | 1.012        | 1.015        | 0.973        | 0.940        | 0.987        | 0.984        | 1.003        | 1.013        | 1.027         | 1.004         | 1.057         | Q92925       | SMARCD2   | SWI/SNF-related matrix-associated actin-dependent regulator of chromatin subfamily D member 2                    |
| 1.136           | 1.072        | 1.012        | 1.014        | 0.972        | 0.933        | 0.909        | 1.109        | 0.877        | 0.985         | 1.040         | 0.962         | Q6STE5       | SMARCD3   | SWI/SNF-related matrix-associated actin-dependent regulator of chromatin subfamily D member 3                    |
| 0.960           | 0.967        | 0.982        | 0.986        | 0.974        | 1.034        | 0.961        | 0.911        | 0.984        | 0.978         | 1.000         | 1.027         | Q969G3       | SMARCE1   | SWI/SNF-related matrix-associated actin-dependent regulator of chromatin subfamily E member 1                    |
| 1.035           | 0.988        | 1.085        | 0.990        | 0.969        | 0.994        | 1.011        | 0.989        | 0.976        | 0.962         | 1.019         | 1.023         | Q9P0W2       | HMG20B    | SWI/SNF-related matrix-associated actin-dependent regulator of chromatin subfamily E member 1-related            |
| 1.012           | 1.001        | 1.043        | 1.004        | 0.952        | 1.013        | 1.014        | 0.931        | 1.005        | 1.049         | 0.987         | 1.044         | Q9UH65       | SWAP70    | Switch-associated protein 70                                                                                     |
| 1.017           | 1.001        | 1.026        | 1.004        | 0.973        | 1.029        | 0.992        | 1.053        | 1.035        | 0.992         | 0.986         | 1.034         | Q92797       | SYMPK     | Symplekin                                                                                                        |
| 0.988           | 0.988        | 1.024        | 0.980        | 0.978        | 0.990        | 1.002        | 1.061        | 0.971        | 1.027         | 1.006         | 1.056         | Q96A49       | SYAP1     | Synapse-associated protein 1                                                                                     |
| 1.001           | 1.008        | 0.998        | 0.999        | 1.074        | 0.994        | 1.038        | 1.056        | 1.036        | 1.027         | 1.030         | 0.991         | Q99536       | VAT1      | Synaptic vesicle membrane protein VAT-1 homolog                                                                  |
| 0.984           | 1.006        | 1.021        | 0.993        | 0.917        | 1.013        | 1.007        | 1.034        | 1.088        | 1.004         | 1.012         | 1.072         | O15498       | YKT6      | Synaptobrevin homolog YKT6                                                                                       |
| 1.026           | 1.145        | 0.995        |              |              |              |              |              |              |               |               |               | O43759       | SYNGR1    | Synaptogyrin-1                                                                                                   |
| 0.976           | 0.973        | 1.064        | 0.834        | 0.929        | 1.021        | 0.951        | 0.900        | 1.049        |               |               |               | O43761       | SYNGR3    | Synaptogyrin-3                                                                                                   |
| 0.993           | 1.004        | 1.046        | 0.999        | 0.969        | 1.055        | 0.946        | 1.047        | 1.026        | 1.059         | 0.991         | 1.078         | J3KQV8       | SYNJ1     | Synaptojanin-1                                                                                                   |
| 0.992           | 1.016        | 1.047        | 0.971        | 0.946        | 0.968        | 0.966        | 0.940        | 0.999        | 0.943         | 0.915         | 1.005         | O15056       | SYNJ2     | Synaptojanin-2                                                                                                   |
| 0.924           | 1.004        | 1.017        | 1.244        | 1.557        | 0.947        |              |              |              |               |               |               | Q92791       | P3H4      | Synaptonemal complex protein SC65                                                                                |
| 1.050           | 1.032        | 1.025        | 1.077        | 1.128        | 1.041        |              |              |              | 1.271         | 0.970         | 1.197         | P08247       | SYP       | Synaptophysin                                                                                                    |

| Abundance Ratio |              |              |              |              |              |              |              |              |               |               |               | Accession ID | Gene name     | Protein Description                                |
|-----------------|--------------|--------------|--------------|--------------|--------------|--------------|--------------|--------------|---------------|---------------|---------------|--------------|---------------|----------------------------------------------------|
| 1 d<br>M1/C1    | 1 d<br>M2/C2 | 1 d<br>M3/C3 | 4 d<br>M1/C1 | 4 d<br>M2/C2 | 4 d<br>M3/C3 | 7 d<br>M1/C1 | 7 d<br>M2/C2 | 7 d<br>M3/C3 | 10 d<br>M1/C1 | 10 d<br>M2/C2 | 10 d<br>M3/C3 |              |               |                                                    |
| 0.982           | 0.960        | 0.917        | 0.967        | 0.927        | 1.026        | 1.164        | 1.173        | 1.032        | 1.117         | 1.029         | 1.009         | Q16563       | SYPL1         | Synaptophysin-like protein 1                       |
| 0.953           | 0.966        | 1.010        | 1.025        | 0.933        | 1.015        | 1.027        | 0.992        | 0.977        | 1.051         | 1.032         | 1.096         | O00161       | SNAP23        | Synaptosomal-associated protein 23                 |
| 1.002           | 0.984        | 1.047        | 0.987        | 1.003        | 1.007        | 0.975        | 0.922        | 1.003        | 1.069         | 0.998         | 1.024         | O95721       | SNAP29        | Synaptosomal-associated protein 29                 |
| 1.114           | 0.824        | 1.088        |              |              |              |              |              |              | 0.969         | 1.548         | 0.636         | Q5SQN1       | SNAP47        | Synaptosomal-associated protein 47                 |
| 1.054           | 0.993        | 0.890        |              |              |              | 1.013        | 1.164        | 1.158        |               |               |               | Q96C24       | SYTL4         | Synaptotagmin-like protein 4                       |
| 1.028           | 1.043        | 1.056        | 1.132        | 1.160        | 1.107        | 1.095        | 1.169        | 1.126        | 1.090         | 1.074         | 1.136         | G5EA09       | SDCBP         | Syndecan binding protein (Syntenin), isoform CRA_a |
| 0.942           | 0.941        | 1.008        | 0.997        | 1.053        | 1.020        | 0.962        | 0.974        | 0.940        | 1.017         | 1.036         | 1.095         | P18827       | SDC1          | Syndecan-1                                         |
| 0.930           | 1.003        | 0.978        | 0.989        | 0.914        | 1.045        | 1.086        | 0.979        | 0.958        | 1.198         | 1.006         | 1.128         | P31431       | SDC4          | Syndecan-4                                         |
| 1.038           | 0.981        | 1.048        | 1.023        | 0.970        | 1.030        | 1.001        | 0.974        | 1.030        | 0.996         | 1.016         | 1.023         | Q96JG6       | VPS50         | Syndetin                                           |
| 0.982           | 1.033        | 1.016        | 0.984        | 0.989        | 0.995        | 0.987        | 1.013        | 0.992        | 1.011         | 0.984         | 1.021         | Q9NPQ8       | RIC8A         | Synembryn-A                                        |
|                 |              |              |              |              |              | 1.083        | 0.900        | 1.072        | 0.927         | 1.053         | 1.054         | B7WPL0       | RIC8B         | Synembryn-B                                        |
| 1.006           | 1.030        | 1.069        | 0.988        | 0.950        | 0.978        | 1.010        | 1.014        | 0.997        | 1.015         | 1.014         | 1.062         | Q9UMZ2       | SYNRG         | Synergina gamma                                    |
| 1.090           | 0.974        | 0.990        | 0.949        | 0.989        | 0.984        | 0.999        | 0.892        | 0.901        | 1.099         | 1.046         | 1.084         | A0A087WUM0   | SYNJ2BP-COX16 | SYNJ2BP-COX16 readthrough (Fragment)               |
| 1.047           | 0.971        | 0.988        | 0.978        | 0.902        | 1.007        | 1.024        | 1.021        | 0.979        | 0.987         | 0.981         | 1.044         | A0A087WYV9   | SYNJ2BP-COX16 | SYNJ2BP-COX16 readthrough                          |
| 0.899           | 1.161        | 0.900        | 1.303        | 0.951        | 1.267        | 0.737        | 0.725        | 1.140        |               |               |               | A0A0C4DG86   | SYBU          | Syntabulin                                         |
| 0.923           | 1.011        | 0.969        | 0.992        | 0.865        | 1.017        |              |              |              |               |               |               | O60499       | STX10         | Syntaxin-10                                        |
| 1.060           | 0.934        | 1.044        | 0.994        | 0.916        | 1.071        | 0.984        | 1.031        | 1.002        | 1.163         | 1.162         | 1.232         | O75558       | STX11         | Syntaxin-11                                        |
| 0.927           | 1.003        | 1.029        | 0.983        | 0.935        | 1.055        | 0.988        | 1.024        | 1.041        | 1.016         | 1.029         | 1.057         | Q86Y82       | STX12         | Syntaxin-12                                        |
| 1.063           | 1.011        | 1.016        | 0.994        | 0.928        | 0.980        | 0.957        | 0.998        | 1.016        | 0.981         | 0.964         | 1.033         | P56962       | STX17         | Syntaxin-17                                        |
| 0.975           | 0.999        | 1.027        | 0.991        | 1.038        | 1.006        | 1.052        | 1.061        | 1.082        | 1.061         | 1.047         | 1.094         | Q9P2W9       | STX18         | Syntaxin-18                                        |
| 0.990           | 0.989        | 1.044        | 0.970        | 0.946        | 1.045        | 1.024        | 0.968        | 0.999        | 1.074         | 1.004         | 1.129         | P32856       | STX2          | Syntaxin-2                                         |
| 0.993           | 0.945        | 1.090        | 1.083        | 0.900        | 1.063        | 1.067        | 1.046        | 1.094        | 1.155         | 0.995         | 1.062         | Q13277       | STX3          | Syntaxin-3                                         |
| 0.968           | 0.950        | 1.037        | 0.999        | 0.956        | 1.051        | 1.080        | 0.963        | 1.042        | 1.088         | 1.039         | 1.032         | Q12846       | STX4          | Syntaxin-4                                         |
| 0.955           | 0.974        | 1.048        | 0.967        | 0.880        | 1.024        | 0.957        | 1.011        | 1.018        | 0.994         | 1.004         | 0.999         | Q13190       | STX5          | Syntaxin-5                                         |
| 1.032           | 0.972        | 1.000        | 1.057        | 0.948        | 0.990        | 1.054        | 1.039        | 1.030        | 1.040         | 0.986         | 1.019         | O43752       | STX6          | Syntaxin-6                                         |
| 0.976           | 1.006        | 1.044        | 0.982        | 0.962        | 1.024        | 0.994        | 1.025        | 1.022        | 1.038         | 1.020         | 1.019         | O15400       | STX7          | Syntaxin-7                                         |
| 0.971           | 0.983        | 1.045        | 1.007        | 0.917        | 1.015        | 0.979        | 0.996        | 0.974        | 0.961         | 0.984         | 0.987         | Q9UNK0       | STX8          | Syntaxin-8                                         |
| 0.997           | 1.028        | 1.015        | 1.007        | 0.988        | 1.016        | 1.004        | 1.048        | 0.993        | 1.005         | 0.986         | 1.011         | Q15833       | STXBP2        | Syntaxin-binding protein 2                         |
| 0.973           | 1.002        | 1.007        | 0.992        | 1.001        | 1.009        | 1.007        | 1.027        | 1.011        | 0.960         | 0.999         | 1.022         | O00186       | STXBP3        | Syntaxin-binding protein 3                         |
| 1.090           | 0.925        | 1.149        |              |              |              |              |              |              | 1.244         | 1.142         | 1.265         | Q6ZWJ1       | STXBP4        | Syntaxin-binding protein 4                         |
| 1.008           | 1.052        | 0.978        | 0.933        | 0.916        | 0.955        | 0.992        | 1.008        | 1.024        | 0.911         | 1.015         | 0.923         | Q5T5C0       | STXBP5        | Syntaxin-binding protein 5                         |
| 1.065           | 0.938        | 0.810        |              |              |              | 0.616        | 1.407        | 0.770        | 0.855         | 1.156         | 0.999         | O00560       | SDCBP         | Syntenin-1                                         |
| 1.141           | 0.861        | 0.969        |              |              |              |              |              |              |               |               |               | Q9H190       | SDCBP2        | Syntenin-2                                         |

| Abundance Ratio |              |              |              |              |              |              |              |              |               |               |               | Accession ID | Gene name | Protein Description                                                                        |
|-----------------|--------------|--------------|--------------|--------------|--------------|--------------|--------------|--------------|---------------|---------------|---------------|--------------|-----------|--------------------------------------------------------------------------------------------|
| 1 d<br>M1/C1    | 1 d<br>M2/C2 | 1 d<br>M3/C3 | 4 d<br>M1/C1 | 4 d<br>M2/C2 | 4 d<br>M3/C3 | 7 d<br>M1/C1 | 7 d<br>M2/C2 | 7 d<br>M3/C3 | 10 d<br>M1/C1 | 10 d<br>M2/C2 | 10 d<br>M3/C3 |              |           |                                                                                            |
| 1.012           | 1.028        | 1.028        | 0.895        | 1.100        | 0.918        | 0.978        | 1.012        | 1.012        | 0.992         | 0.965         | 1.113         | O75529       | TAF5L     | TAF5-like RNA polymerase II p300/CBP-associated factor-associated factor 65 kDa subunit 5L |
| 1.032           | 1.069        | 1.125        | 1.022        | 0.992        | 0.992        | 0.976        | 0.933        | 1.000        | 1.031         | 1.027         | 1.123         | Q9Y6J9       | TAF6L     | TAF6-like RNA polymerase II p300/CBP-associated factor-associated factor 65 kDa subunit 6L |
| 0.779           | 0.973        | 0.996        | 0.831        | 1.085        | 0.925        | 1.023        | 0.665        | 0.925        | 1.069         | 1.041         | 1.078         | O00258       | WRB       | Tail-anchored protein insertion receptor WRB                                               |
| 0.968           | 0.999        | 0.996        | 0.978        | 1.006        | 0.992        | 0.987        | 0.975        | 0.997        | 0.976         | 0.981         | 0.999         | Q9Y490       | TLN1      | Talin-1                                                                                    |
| 0.939           | 0.937        | 1.025        | 1.006        | 1.061        | 1.012        | 0.886        | 0.736        | 0.914        | 0.939         | 0.994         | 1.004         | Q9Y4G6       | TLN2      | Talin-2                                                                                    |
| 1.053           | 1.365        | 0.904        | 1.065        | 1.016        | 1.181        | 0.894        | 1.438        | 1.330        | 0.971         | 1.238         | 1.073         | O95271       | TNKS      | Tankyrase-1                                                                                |
| 0.979           | 1.020        | 1.019        | 0.983        | 1.009        | 0.992        | 1.019        | 1.043        | 0.997        | 0.959         | 0.991         | 0.924         | A0A0A0MSV9   | TAPBP     | Tapasin                                                                                    |
| 0.991           | 0.968        | 1.062        | 0.992        | 0.984        | 1.036        | 0.998        | 0.985        | 0.992        | 1.050         | 1.031         | 1.036         | Q4KMQ1       | TPRN      | Taperin                                                                                    |
| 0.983           | 1.002        | 0.962        | 0.968        | 0.996        | 0.994        | 0.980        | 1.028        | 0.980        | 0.983         | 1.039         | 0.984         | Q13148       | TARDBP    | TAR DNA-binding protein 43                                                                 |
| 1.012           | 1.012        | 1.064        | 0.985        | 0.972        | 1.021        | 0.952        | 0.942        | 1.027        | 0.958         | 0.973         | 1.102         | Q96GM8       | TOE1      | Target of EGR1 protein 1                                                                   |
| 1.005           | 0.978        | 1.074        | 0.986        | 0.977        | 1.072        | 1.006        | 1.009        | 1.038        | 1.032         | 0.988         | 1.028         | O60784       | TOM1      | Target of Myb protein 1                                                                    |
| 1.030           | 0.999        | 1.015        | 1.017        | 0.955        | 1.056        | 0.997        | 0.918        | 0.953        | 1.030         | 1.024         | 1.023         | Q9BPZ7       | MAPKAP1   | Target of rapamycin complex 2 subunit MAPKAP1                                              |
| 1.012           | 0.959        | 1.068        | 0.946        | 1.101        | 1.006        | 0.979        | 0.877        | 0.977        | 1.010         | 1.017         | 1.035         | Q9BVC4       | MLST8     | Target of rapamycin complex subunit LST8                                                   |
| 0.932           | 1.005        | 0.993        | 1.021        | 0.918        | 0.926        | 1.134        | 1.130        | 1.024        | 0.905         | 0.871         | 1.045         | Q9ULW0       | TPX2      | Targeting protein for Xklp2                                                                |
| 0.817           | 1.008        | 1.111        | 0.963        | 0.877        | 0.904        | 0.897        | 1.265        | 1.181        | 0.694         | 0.860         | 1.139         | F8W130       | TROAP     | Tastin                                                                                     |
|                 |              |              |              |              |              | 0.841        | 1.163        | 0.827        | 0.952         | 1.117         | 0.981         | Q15573       | TAF1A     | TATA box-binding protein-associated factor RNA polymerase I subunit A                      |
|                 |              |              | 0.940        | 0.888        | 1.247        | 1.026        | 1.162        | 0.983        | 0.963         | 1.034         | 1.250         | Q15572       | TAF1C     | TATA box-binding protein-associated factor RNA polymerase I subunit C                      |
| 1.024           | 0.996        | 0.986        | 1.006        | 0.984        | 1.000        | 0.874        | 1.108        | 1.116        | 0.985         | 1.112         | 1.308         | P62380       | TBPL1     | TATA box-binding protein-like protein 1                                                    |
| 1.026           | 1.040        | 1.021        | 0.992        | 0.989        | 1.028        | 1.043        | 1.113        | 1.014        | 1.010         | 0.999         | 1.011         | A0A0A0MTH9   | BTAF1     | TATA-binding protein-associated factor 172                                                 |
| 0.983           | 0.982        | 1.029        | 0.940        | 1.024        | 0.984        | 0.900        | 0.821        | 0.968        | 0.982         | 1.011         | 1.023         | Q92804       | TAF15     | TATA-binding protein-associated factor 2N                                                  |
| 0.944           | 0.968        | 1.046        | 1.023        | 0.969        | 1.007        | 0.990        | 0.983        | 0.936        | 1.008         | 0.995         | 0.884         | P20226       | TBP       | TATA-box-binding protein                                                                   |
| 1.034           | 1.111        | 1.037        | 1.107        | 1.050        | 0.995        | 1.003        | 1.041        | 1.057        | 0.935         | 0.920         | 1.041         | B8ZZD4       | TAX1BP1   | Tax1-binding protein 1                                                                     |
| 1.020           | 1.008        | 0.979        | 0.961        | 0.905        | 0.946        | 0.972        | 1.050        | 0.981        | 1.018         | 0.990         | 1.017         | O14907       | TAX1BP3   | Tax1-binding protein 3                                                                     |
| 1.129           | 1.066        | 1.197        | 0.972        | 1.012        | 0.987        | 1.027        | 0.989        | 0.958        | 0.890         | 1.023         | 1.166         | Q8TEA7       | TBCK      | TBC domain-containing protein kinase-like protein                                          |
| 0.991           | 0.999        | 1.038        | 1.002        | 0.961        | 0.976        | 0.933        | 0.972        | 1.014        | 0.973         | 0.980         | 1.086         | Q86TI0       | TBC1D1    | TBC1 domain family member 1                                                                |
| 1.020           | 0.960        | 1.004        | 0.979        | 0.940        | 1.025        | 0.986        | 1.069        | 1.035        | 1.019         | 1.038         | 1.062         | Q9BXI6       | TBC1D10A  | TBC1 domain family member 10A                                                              |
| 0.965           | 0.973        | 1.019        | 1.010        | 0.996        | 1.014        | 1.001        | 0.952        | 0.977        | 0.999         | 1.017         | 1.020         | Q4KMP7       | TBC1D10B  | TBC1 domain family member 10B                                                              |
| 1.019           | 1.003        | 1.004        | 1.001        | 0.969        | 1.030        | 0.989        | 1.060        | 1.019        | 0.987         | 0.988         | 0.969         | Q9NVG8       | TBC1D13   | TBC1 domain family member 13                                                               |
| 0.985           | 0.882        | 1.048        | 0.912        | 0.951        | 1.109        | 1.014        | 1.245        | 1.090        | 1.096         | 1.198         | 1.177         | Q9P2M4       | TBC1D14   | TBC1 domain family member 14                                                               |



| Abundance Ratio |              |              |              |              |              |              |              |              |               |               |               | Accession ID | Gene name | Protein Description                                 |
|-----------------|--------------|--------------|--------------|--------------|--------------|--------------|--------------|--------------|---------------|---------------|---------------|--------------|-----------|-----------------------------------------------------|
| 1 d<br>M1/C1    | 1 d<br>M2/C2 | 1 d<br>M3/C3 | 4 d<br>M1/C1 | 4 d<br>M2/C2 | 4 d<br>M3/C3 | 7 d<br>M1/C1 | 7 d<br>M2/C2 | 7 d<br>M3/C3 | 10 d<br>M1/C1 | 10 d<br>M2/C2 | 10 d<br>M3/C3 |              |           |                                                     |
| 1.129           | 0.923        | 1.075        | 1.068        | 0.984        | 1.157        |              |              |              | 1.338         | 1.109         | 1.430         | Q8TBP0       | TBC1D16   | TBC1 domain family member 16                        |
| 1.001           | 1.062        | 1.048        | 0.982        | 0.952        | 1.029        | 0.992        | 0.983        | 0.978        | 1.053         | 1.072         | 1.027         | Q9HA65       | TBC1D17   | TBC1 domain family member 17                        |
| 1.068           | 0.971        | 1.028        | 1.092        | 1.084        | 1.112        | 1.009        | 1.063        | 1.034        | 1.002         | 0.972         | 1.089         | Q8WUA7       | TBC1D22A  | TBC1 domain family member 22A                       |
|                 |              |              | 1.116        | 0.935        | 0.922        |              |              |              |               |               |               | Q9NU19       | TBC1D22B  | TBC1 domain family member 22B                       |
| 0.988           | 1.003        | 1.006        | 0.998        | 0.956        | 1.024        | 0.985        | 1.059        | 1.037        | 1.012         | 0.988         | 1.064         | Q9NUY8       | TBC1D23   | TBC1 domain family member 23                        |
| 0.972           | 0.952        | 0.923        | 1.007        | 0.897        | 1.011        | 1.038        | 1.057        | 1.013        | 1.008         | 0.982         | 1.046         | Q9ULP9       | TBC1D24   | TBC1 domain family member 24                        |
| 0.957           | 0.888        | 1.141        | 1.016        | 1.014        | 1.016        | 1.007        | 1.078        | 1.025        | 0.989         | 0.988         | 0.990         | Q3MII6       | TBC1D25   | TBC1 domain family member 25                        |
| 0.971           | 1.011        | 1.023        | 1.015        | 0.943        | 1.094        | 0.977        | 1.040        | 1.055        | 0.970         | 0.986         | 1.018         | Q9BYX2       | TBC1D2    | TBC1 domain family member 2A                        |
| 0.932           | 1.007        | 0.965        | 0.978        | 0.961        | 1.046        | 1.127        | 1.058        | 0.976        | 1.000         | 0.941         | 1.339         | Q9UPU7       | TBC1D2B   | TBC1 domain family member 2B                        |
| 1.067           | 1.013        | 1.049        | 1.018        | 0.957        | 0.998        | 0.987        | 1.010        | 1.012        | 0.988         | 0.993         | 1.080         | O60343       | TBC1D4    | TBC1 domain family member 4                         |
| 1.064           | 1.101        | 0.981        | 0.956        | 1.032        | 1.042        | 0.958        | 1.015        | 1.095        | 0.955         | 0.978         | 1.034         | Q9P0N9       | TBC1D7    | TBC1 domain family member 7                         |
| 0.998           | 1.014        | 1.069        | 0.980        | 0.845        | 1.139        |              |              |              |               |               |               | J3KQ40       | TBC1D8    | TBC1 domain family member 8                         |
| 0.999           | 0.985        | 0.979        | 0.974        | 0.982        | 0.982        | 0.938        | 1.067        | 0.981        | 0.937         | 0.967         | 0.940         | Q0IIM8       | TBC1D8B   | TBC1 domain family member 8B                        |
| 0.977           | 0.960        | 1.064        | 0.972        | 0.945        | 1.012        | 1.034        | 1.027        | 1.028        | 1.069         | 0.986         | 1.022         | Q66K14       | TBC1D9B   | TBC1 domain family member 9B                        |
| 1.022           | 0.954        | 0.989        | 0.982        | 0.931        | 1.085        | 1.033        | 1.200        | 1.145        | 1.056         | 0.946         | 1.007         | Q8TB96       | ITFG1     | T-cell immunomodulatory protein                     |
| 1.000           | 1.004        | 1.011        | 1.003        | 1.091        | 0.989        | 1.001        | 1.012        | 1.034        | 0.953         | 1.003         | 0.991         | P17987       | TCP1      | T-complex protein 1 subunit alpha                   |
| 0.962           | 0.994        | 0.968        | 0.999        | 0.988        | 1.009        | 0.971        | 1.028        | 1.021        | 0.957         | 1.001         | 0.973         | P78371       | CCT2      | T-complex protein 1 subunit beta                    |
| 1.028           | 0.988        | 1.009        | 1.009        | 1.168        | 0.988        | 1.020        | 0.949        | 1.049        | 0.959         | 1.001         | 0.973         | P50991       | CCT4      | T-complex protein 1 subunit delta                   |
| 0.964           | 1.003        | 0.968        | 1.017        | 1.042        | 1.016        | 0.993        | 1.009        | 1.018        | 0.953         | 0.987         | 0.974         | P48643       | CCT5      | T-complex protein 1 subunit epsilon                 |
| 1.028           | 0.995        | 1.008        | 1.024        | 1.061        | 0.984        | 1.012        | 1.029        | 1.016        | 0.965         | 0.983         | 0.981         | Q99832       | CCT7      | T-complex protein 1 subunit eta                     |
| 0.996           | 0.986        | 0.988        | 1.004        | 1.106        | 0.976        | 1.005        | 0.997        | 1.027        | 0.948         | 1.003         | 0.994         | P49368       | CCT3      | T-complex protein 1 subunit gamma                   |
| 0.960           | 0.999        | 0.984        | 0.997        | 0.990        | 1.003        | 1.002        | 1.029        | 0.988        | 0.993         | 1.020         | 0.990         | P50990       | CCT8      | T-complex protein 1 subunit theta                   |
| 0.994           | 1.001        | 0.998        | 1.012        | 0.991        | 1.027        | 0.988        | 1.045        | 1.021        | 0.979         | 1.010         | 0.999         | P40227       | CCT6A     | T-complex protein 1 subunit zeta                    |
| 0.954           | 0.890        | 1.042        | 0.958        | 0.896        | 0.954        | 0.942        | 0.984        | 1.006        | 0.800         | 1.012         | 0.992         | Q92526       | CCT6B     | T-complex protein 1 subunit zeta-2                  |
| 0.994           | 0.982        | 1.038        | 0.975        | 0.922        | 1.007        | 1.014        | 1.025        | 1.031        | 1.050         | 1.032         | 1.052         | Q9NUJ3       | TCP11L1   | T-complex protein 11-like protein 1                 |
| 0.985           | 0.889        | 1.008        | 0.880        | 0.852        | 0.867        |              |              |              |               |               |               | Q8N4U5       | TCP11L2   | T-complex protein 11-like protein 2                 |
| 1.115           | 1.139        | 1.176        | 0.906        | 0.942        | 0.928        | 0.850        | 1.176        | 1.045        | 0.987         | 0.968         | 1.039         | O15040       | TECPR2    | Tectonin beta-propeller repeat-containing protein 2 |
| 1.023           | 0.959        | 1.035        | 0.961        | 0.935        | 1.000        | 1.006        | 1.080        | 1.063        | 0.908         | 0.980         | 1.010         | O43156       | TTI1      | TELO2-interacting protein 1 homolog                 |
| 1.005           | 0.968        | 1.034        | 0.974        | 0.924        | 0.980        | 0.983        | 1.159        | 0.948        | 0.981         | 0.996         | 1.058         | Q6NXR4       | TTI2      | TELO2-interacting protein 2                         |
| 0.962           | 0.973        | 1.057        | 0.912        | 0.980        | 0.977        | 0.952        | 0.857        | 1.001        | 0.959         | 0.958         | 1.077         | Q9BUR4       | WRAP53    | Telomerase Cajal body protein 1                     |
|                 |              |              | 0.949        | 1.012        | 1.010        | 1.006        | 1.046        | 0.981        | 1.066         | 0.963         | 1.022         | Q99973       | TEP1      | Telomerase protein component 1                      |
| 1.033           | 0.994        | 1.058        | 1.008        | 0.957        | 0.993        | 1.025        | 1.040        | 1.051        | 1.006         | 0.975         | 1.034         | Q86US8       | SMG6      | Telomerase-binding protein EST1A                    |
| 1.029           | 0.972        | 0.997        | 0.957        | 0.931        | 0.999        | 0.980        | 0.988        | 1.061        | 0.969         | 0.963         | 1.010         | Q9Y4R8       | TELO2     | Telomere length regulation protein TEL2 homolog     |

| Abundance Ratio |              |              |              |              |              |              |              |              |               |               |               | Accession ID | Gene name | Protein Description                                        |
|-----------------|--------------|--------------|--------------|--------------|--------------|--------------|--------------|--------------|---------------|---------------|---------------|--------------|-----------|------------------------------------------------------------|
| 1 d<br>M1/C1    | 1 d<br>M2/C2 | 1 d<br>M3/C3 | 4 d<br>M1/C1 | 4 d<br>M2/C2 | 4 d<br>M3/C3 | 7 d<br>M1/C1 | 7 d<br>M2/C2 | 7 d<br>M3/C3 | 10 d<br>M1/C1 | 10 d<br>M2/C2 | 10 d<br>M3/C3 |              |           |                                                            |
| 1.018           | 1.019        | 1.080        | 0.988        | 0.957        | 1.018        | 0.995        | 1.101        | 1.061        | 1.003         | 0.954         | 1.048         | Q5UIP0       | RIF1      | Telomere-associated protein RIF1                           |
| 1.013           | 1.034        | 1.005        | 1.005        | 0.996        | 1.009        | 1.023        | 1.049        | 1.024        | 1.100         | 1.017         | 1.027         | Q15554       | TERF2     | Telomeric repeat-binding factor 2                          |
| 1.042           | 0.987        | 1.009        | 0.981        | 0.952        | 1.055        | 0.981        | 0.958        | 0.980        | 1.016         | 1.041         | 1.030         | Q9NYB0       | TERF2IP   | Telomeric repeat-binding factor 2-interacting protein 1    |
| 1.050           | 0.981        | 1.052        | 1.014        | 0.968        | 1.010        | 1.065        | 0.927        | 0.978        | 1.133         | 0.939         | 1.055         | P24821       | TNC       | Tenascin                                                   |
| 0.979           | 1.003        | 1.020        | 1.032        | 1.020        | 1.012        | 1.044        | 0.984        | 1.022        | 1.060         | 0.957         | 1.122         | Q68CZ2       | TNS3      | Tensin-3                                                   |
| 1.050           | 0.990        | 1.028        | 0.932        | 0.892        | 1.076        | 1.044        | 1.007        | 1.062        | 1.081         | 1.064         | 0.899         | Q9BSI4       | TINF2     | TERF1-interacting nuclear factor 2                         |
| 1.031           | 1.018        | 1.030        | 1.004        | 0.911        | 1.013        | 0.932        | 1.053        | 1.026        | 0.966         | 0.908         | 1.032         | A0A0C4DFM7   | ZCCHC11   | Terminal uridylyltransferase 4                             |
| 1.061           | 1.009        | 1.045        | 1.039        | 0.958        | 1.029        | 1.031        | 1.123        | 1.053        | 1.022         | 0.982         | 1.055         | Q5VYS8       | ZCCHC6    | Terminal uridylyltransferase 7                             |
| 0.988           | 0.984        | 0.986        | 1.000        | 1.023        | 0.978        | 1.024        | 0.939        | 0.971        | 1.015         | 0.987         | 0.997         | Q9UGI8       | TES       | Testin                                                     |
|                 |              |              | 0.776        | 1.006        | 1.128        |              |              |              | 1.470         | 1.073         | 1.687         | Q8N9V7       | TOPAZ1    | Testis- and ovary-specific PAZ domain-containing protein 1 |
| 1.006           | 0.990        | 1.029        | 0.990        | 0.912        | 1.010        | 1.005        | 1.038        | 0.992        | 0.980         | 1.014         | 0.978         | Q9NXF1       | TEX10     | Testis-expressed protein 10                                |
| 0.935           | 0.999        | 1.068        | 0.992        | 0.981        | 1.069        | 0.996        | 1.044        | 0.992        | 1.157         | 0.962         | 1.060         | Q9Y6I9       | TEX264    | Testis-expressed protein 264                               |
| 1.041           | 1.060        | 1.063        | 1.130        | 0.890        | 0.944        |              |              |              |               |               |               | Q5JUR7       | TEX30     | Testis-expressed protein 30                                |
| 0.976           | 1.168        | 0.928        | 1.066        | 1.077        | 1.007        | 0.959        | 0.999        | 0.986        |               |               |               | Q9H0U9       | TSPYL1    | Testis-specific Y-encoded-like protein 1                   |
| 1.011           | 0.861        | 1.116        |              |              |              | 0.794        | 1.219        | 1.000        |               |               |               | Q9H2G4       | TSPYL2    | Testis-specific Y-encoded-like protein 2                   |
| 0.978           | 0.986        | 0.984        | 0.949        | 0.870        | 1.020        | 1.010        | 1.009        | 1.007        | 0.924         | 1.026         | 0.954         | G8JLH6       | CD9       | Tetraspanin (Fragment)                                     |
| 1.034           | 0.962        | 1.085        | 1.107        | 0.854        | 0.950        | 1.078        | 1.051        | 1.046        | 1.078         | 1.061         | 1.060         | A6NMH8       | CD81      | Tetraspanin                                                |
| 1.077           | 1.206        | 1.225        |              |              |              |              |              |              | 0.903         | 0.886         | 0.927         | J3KQ42       | TSPAN4    | Tetraspanin                                                |
|                 |              |              |              |              |              |              |              |              | 1.087         | 0.961         | 1.034         | O95857       | TSPAN13   | Tetraspanin-13                                             |
| 1.054           | 1.131        | 1.219        | 1.061        | 1.119        | 1.355        | 1.079        | 1.057        | 1.123        | 1.078         | 1.044         | 1.082         | Q8NG11       | TSPAN14   | Tetraspanin-14                                             |
| 0.874           | 0.881        | 1.215        | 1.207        | 1.016        | 1.517        | 1.324        | 1.092        | 1.159        | 1.346         | 1.320         | 1.359         | O60637       | TSPAN3    | Tetraspanin-3                                              |
|                 |              |              |              |              |              |              |              |              | 1.115         | 1.205         | 1.347         | Q12999       | TSPAN31   | Tetraspanin-31                                             |
|                 |              |              | 1.092        | 0.913        | 1.037        | 1.465        | 0.866        | 0.918        | 1.367         | 1.168         | 1.146         | O43657       | TSPAN6    | Tetraspanin-6                                              |
| 0.965           | 1.059        | 1.160        | 0.949        | 0.957        | 1.076        | 1.159        | 0.889        | 1.026        | 0.921         | 0.971         | 1.029         | A0A0C4DGX9   | TTC8      | Tetratricopeptide repeat domain 8 isoform 1                |
| 1.076           | 1.028        | 0.972        | 1.015        | 1.016        | 0.963        | 0.976        | 1.019        | 0.950        | 0.954         | 0.984         | 1.010         | Q99614       | TTC1      | Tetratricopeptide repeat protein 1                         |
| 0.949           | 0.988        | 1.165        | 1.002        | 0.936        | 0.930        | 0.998        | 1.063        | 1.046        | 0.949         | 0.821         | 0.913         | Q8NBP0       | TTC13     | Tetratricopeptide repeat protein 13                        |
| 0.932           | 0.912        | 0.891        | 0.884        | 0.842        | 1.161        | 0.821        | 1.171        | 1.290        |               |               |               | Q96N46       | TTC14     | Tetratricopeptide repeat protein 14                        |
| 1.066           | 0.938        | 1.115        | 1.083        | 0.945        | 1.053        | 1.000        | 0.949        | 0.977        | 1.074         | 0.980         | 0.876         | Q96AE7       | TTC17     | Tetratricopeptide repeat protein 17                        |
| 1.003           | 0.998        | 0.997        | 0.991        | 0.976        | 0.995        | 1.045        | 1.004        | 0.998        | 1.072         | 0.996         | 1.016         | Q6DKK2       | TTC19     | Tetratricopeptide repeat protein 19, mitochondrial         |
| 1.100           | 0.905        | 1.043        | 0.982        | 0.945        | 1.027        | 0.964        | 0.990        | 1.113        | 1.045         | 0.970         | 1.128         | Q7Z4L5       | TTC21B    | Tetratricopeptide repeat protein 21B                       |
| 1.000           | 1.020        | 1.070        | 1.023        | 0.908        | 1.020        | 0.995        | 1.082        | 1.010        | 0.927         | 0.955         | 1.092         | Q6P3X3       | TTC27     | Tetratricopeptide repeat protein 27                        |
| 1.037           | 1.051        | 1.013        | 1.028        | 0.973        | 1.005        | 1.055        | 1.101        | 0.998        | 1.016         | 1.001         | 1.053         | Q96AY4       | TTC28     | Tetratricopeptide repeat protein 28                        |

| Abundance Ratio |              |              |              |              |              |              |              |              |               |               |               | Accession ID | Gene name | Protein Description                                           |
|-----------------|--------------|--------------|--------------|--------------|--------------|--------------|--------------|--------------|---------------|---------------|---------------|--------------|-----------|---------------------------------------------------------------|
| 1 d<br>M1/C1    | 1 d<br>M2/C2 | 1 d<br>M3/C3 | 4 d<br>M1/C1 | 4 d<br>M2/C2 | 4 d<br>M3/C3 | 7 d<br>M1/C1 | 7 d<br>M2/C2 | 7 d<br>M3/C3 | 10 d<br>M1/C1 | 10 d<br>M2/C2 | 10 d<br>M3/C3 |              |           |                                                               |
| 0.813           | 0.817        | 0.888        | 1.102        | 1.029        | 1.062        | 1.041        | 0.961        | 1.513        | 1.076         | 1.112         | 0.894         | Q86WT1       | TTC30A    | Tetratricopeptide repeat protein 30A                          |
| 0.981           | 0.950        | 0.986        | 0.963        | 0.930        | 1.010        | 0.942        | 1.007        | 1.002        | 0.978         | 0.967         | 1.021         | Q6PID6       | TTC33     | Tetratricopeptide repeat protein 33                           |
| 1.020           | 0.986        | 0.994        | 1.009        | 0.962        | 1.008        | 1.018        | 1.023        | 1.006        | 1.038         | 0.991         | 1.021         | Q6PGP7       | TTC37     | Tetratricopeptide repeat protein 37                           |
| 1.042           | 0.983        | 1.034        | 1.001        | 0.935        | 1.006        | 0.958        | 1.095        | 1.023        | 1.093         | 0.952         | 1.099         | Q5R3I4       | TTC38     | Tetratricopeptide repeat protein 38                           |
|                 |              |              | 1.054        | 0.997        | 1.030        | 1.314        | 1.085        | 1.021        | 1.011         | 0.997         | 1.066         | Q5SRH9       | TTC39A    | Tetratricopeptide repeat protein 39A                          |
| 1.087           | 0.984        | 1.063        | 0.926        | 0.915        | 1.146        | 0.926        | 0.997        | 1.071        | 0.855         | 1.000         | 0.952         | Q5VTQ0       | TTC39B    | Tetratricopeptide repeat protein 39B                          |
| 1.000           | 0.983        | 0.983        | 1.023        | 0.974        | 1.006        | 1.085        | 1.082        | 0.944        | 0.933         | 0.909         | 1.122         | Q8N584       | TTC39C    | Tetratricopeptide repeat protein 39C                          |
| 1.093           | 1.074        | 1.050        | 0.984        | 1.051        | 0.971        | 0.985        | 1.096        | 1.016        | 0.982         | 1.008         | 0.979         | O95801       | TTC4      | Tetratricopeptide repeat protein 4                            |
| 0.954           | 0.982        | 0.990        | 1.054        | 1.112        | 1.022        | 1.010        | 1.056        | 1.098        | 0.995         | 1.150         | 1.118         | Q8N0Z6       | TTC5      | Tetratricopeptide repeat protein 5                            |
| 1.079           | 1.128        | 1.016        | 1.001        | 1.004        | 1.079        | 1.030        | 1.080        | 1.054        | 0.990         | 1.015         | 1.038         | Q9ULT0       | TTC7A     | Tetratricopeptide repeat protein 7A                           |
| 1.068           | 1.046        | 1.004        | 0.948        | 0.957        | 0.967        | 0.970        | 1.047        | 0.961        | 0.979         | 0.986         | 0.998         | Q8N5M4       | TTC9C     | Tetratricopeptide repeat protein 9C                           |
| 0.993           | 1.002        | 1.025        | 1.002        | 0.950        | 1.053        | 0.988        | 1.034        | 1.029        | 0.978         | 0.973         | 1.049         | P19447       | ERCC3     | TFIIH basal transcription factor complex helicase XPB subunit |
| 1.042           | 1.013        | 1.040        | 1.019        | 1.008        | 1.040        | 1.027        | 1.059        | 1.004        | 0.984         | 0.981         | 1.053         | P18074       | ERCC2     | TFIIH basal transcription factor complex helicase XPD subunit |
| 0.995           | 0.970        | 1.012        | 0.964        | 0.978        | 1.027        | 1.043        | 1.055        | 1.034        | 0.974         | 0.989         | 1.029         | Q15750       | TAB1      | TGF-beta-activated kinase 1 and MAP3K7-binding protein 1      |
| 0.918           | 0.974        | 0.977        | 1.027        | 0.869        | 1.020        | 0.937        | 0.986        | 1.076        | 0.928         | 0.798         | 1.118         | Q9NYJ8       | TAB2      | TGF-beta-activated kinase 1 and MAP3K7-binding protein 2      |
| 1.025           | 0.989        | 1.068        | 0.964        | 0.989        | 1.108        | 0.885        | 0.960        | 1.147        | 0.792         | 1.069         | 1.250         | Q8N5C8       | TAB3      | TGF-beta-activated kinase 1 and MAP3K7-binding protein 3      |
| 1.153           | 1.020        | 0.986        | 0.955        | 1.022        | 0.990        | 1.014        | 1.155        | 0.894        | 1.008         | 0.975         | 0.934         | Q96EK4       | THAP11    | THAP domain-containing protein 11                             |
|                 |              |              |              |              |              |              |              |              | 1.075         | 0.940         | 0.855         | Q9H3S4       | TPK1      | Thiamin pyrophosphokinase 1                                   |
|                 |              |              |              |              |              |              |              |              | 1.047         | 1.113         | 0.973         | O60779       | SLC19A2   | Thiamine transporter 1                                        |
| 1.135           | 0.980        | 1.111        | 1.113        | 0.911        | 0.821        | 0.902        | 1.102        | 1.066        | 0.840         | 0.933         | 0.981         | Q9BU02       | THTPA     | Thiamine-triphosphatase                                       |
| 1.026           | 0.996        | 1.009        | 0.987        | 0.954        | 1.011        | 0.989        | 1.054        | 1.022        | 1.006         | 0.976         | 1.003         | P52888       | THOP1     | Thimet oligopeptidase                                         |
| 1.037           | 1.017        | 0.979        | 0.980        | 1.031        | 1.007        | 1.036        | 1.025        | 1.066        | 0.990         | 0.969         | 1.026         | P51580       | TPMT      | Thiopurine S-methyltransferase                                |
| 0.991           | 0.998        | 0.986        | 1.006        | 1.110        | 0.997        | 1.005        | 0.947        | 1.019        | 0.981         | 1.018         | 0.968         | O95881       | TXNDC12   | Thioredoxin domain-containing protein 12                      |
| 1.141           | 0.993        | 1.122        |              |              |              |              |              |              |               |               |               | Q9P2K2       | TXNDC16   | Thioredoxin domain-containing protein 16                      |
| 1.125           | 1.030        | 1.006        | 1.042        | 1.063        | 0.979        | 1.012        | 0.995        | 0.986        | 0.955         | 0.988         | 0.931         | Q9BRA2       | TXNDC17   | Thioredoxin domain-containing protein 17                      |
| 1.016           | 0.989        | 0.992        | 1.006        | 1.016        | 1.018        | 0.993        | 1.004        | 1.001        | 0.978         | 0.994         | 0.974         | Q8NBS9       | TXNDC5    | Thioredoxin domain-containing protein 5                       |
| 0.987           | 0.993        | 1.008        | 1.012        | 0.995        | 1.007        | 1.033        | 1.054        | 1.009        | 0.947         | 0.995         | 0.975         | O14530       | TXNDC9    | Thioredoxin domain-containing protein 9                       |
| 1.030           | 1.004        | 0.935        | 1.038        | 1.235        | 1.002        | 1.076        | 0.964        | 1.072        | 1.022         | 1.084         | 0.971         | P10599       | TXN       | Thioredoxin                                                   |
| 1.012           | 0.995        | 0.980        | 1.006        | 1.009        | 1.026        | 0.989        | 1.046        | 1.025        | 0.982         | 1.021         | 0.973         | Q16881       | TXNRD1    | Thioredoxin reductase 1, cytoplasmic                          |
| 0.988           | 0.969        | 1.020        | 0.979        | 1.010        | 1.002        | 1.022        | 0.952        | 1.006        | 1.086         | 0.971         | 1.056         | Q9NNW7       | TXNRD2    | Thioredoxin reductase 2, mitochondrial                        |
|                 |              |              | 0.964        | 0.942        | 1.056        | 0.981        | 1.108        | 1.220        | 0.901         | 0.981         | 1.034         | H0YBQ0       | TXNRD3    | Thioredoxin reductase 3                                       |

| Abundance Ratio |              |              |              |              |              |              |              |              |               |               |               | Accession ID | Gene name | Protein Description                                     |
|-----------------|--------------|--------------|--------------|--------------|--------------|--------------|--------------|--------------|---------------|---------------|---------------|--------------|-----------|---------------------------------------------------------|
| 1 d<br>M1/C1    | 1 d<br>M2/C2 | 1 d<br>M3/C3 | 4 d<br>M1/C1 | 4 d<br>M2/C2 | 4 d<br>M3/C3 | 7 d<br>M1/C1 | 7 d<br>M2/C2 | 7 d<br>M3/C3 | 10 d<br>M1/C1 | 10 d<br>M2/C2 | 10 d<br>M3/C3 |              |           |                                                         |
| 1.082           | 0.995        | 0.991        | 0.966        | 0.973        | 0.997        | 0.969        | 0.991        | 1.026        | 0.986         | 0.993         | 0.922         | Q99757       | TXN2      | Thioredoxin, mitochondrial                              |
| 1.011           | 0.996        | 0.989        | 0.981        | 0.959        | 1.005        | 1.000        | 1.031        | 0.995        | 0.986         | 0.992         | 0.980         | P30048       | PRDX3     | Thioredoxin-dependent peroxide reductase, mitochondrial |
| 0.981           | 1.061        | 1.051        |              |              |              |              |              |              |               |               |               | Q9H3M7       | TXNIP     | Thioredoxin-interacting protein                         |
| 0.978           | 1.008        | 0.965        | 0.982        | 1.075        | 0.968        | 1.013        | 0.992        | 0.991        | 1.014         | 1.010         | 1.037         | O43396       | TXNL1     | Thioredoxin-like protein 1                              |
| 0.945           | 1.024        | 0.981        | 1.054        | 1.103        | 1.055        | 1.019        | 1.081        | 1.013        | 0.997         | 1.038         | 1.013         | P83876       | TXNL4A    | Thioredoxin-like protein 4A                             |
| 1.002           | 0.985        | 0.941        | 0.978        | 0.961        | 1.017        | 1.108        | 1.008        | 1.017        |               |               |               | Q9NX01       | TXNL4B    | Thioredoxin-like protein 4B                             |
| 0.966           | 1.033        | 1.070        | 1.045        | 0.962        | 0.967        | 0.939        | 1.125        | 0.983        | 0.691         | 0.704         | 1.039         | Q7RTV5       | AAED1     | Thioredoxin-like protein AAED1                          |
| 0.974           | 1.012        | 0.999        | 0.979        | 0.962        | 1.005        | 1.035        | 1.041        | 0.999        | 1.027         | 1.024         | 0.973         | Q9H3N1       | TMX1      | Thioredoxin-related transmembrane protein 1             |
| 0.977           | 1.005        | 1.016        | 1.085        | 0.967        | 1.061        | 1.059        | 1.060        | 1.047        | 1.080         | 1.049         | 1.079         | Q9Y320       | TMX2      | Thioredoxin-related transmembrane protein 2             |
| 0.981           | 0.991        | 1.023        | 0.972        | 0.939        | 0.973        | 1.005        | 1.062        | 1.009        | 1.070         | 0.992         | 1.048         | Q9H1E5       | TMX4      | Thioredoxin-related transmembrane protein 4             |
| 1.019           | 1.010        | 1.022        | 1.002        | 1.023        | 1.073        | 1.022        | 1.010        | 1.012        | 1.118         | 0.998         | 1.057         | Q16762       | TST       | Thiosulfate sulfurtransferase                           |
| 1.009           | 0.986        | 1.019        | 0.998        | 1.042        | 0.976        | 1.028        | 1.005        | 1.017        | 1.030         | 1.029         | 1.016         | Q96FV9       | THOC1     | THO complex subunit 1                                   |
| 0.960           | 1.001        | 1.006        | 0.972        | 0.964        | 1.021        | 0.971        | 0.961        | 0.989        | 1.000         | 1.001         | 1.015         | Q8NI27       | THOC2     | THO complex subunit 2                                   |
| 0.946           | 0.949        | 0.973        | 0.972        | 0.948        | 0.996        | 0.985        | 1.038        | 0.979        | 1.004         | 1.018         | 1.041         | Q96J01       | THOC3     | THO complex subunit 3                                   |
| 0.977           | 1.003        | 0.987        | 0.977        | 0.946        | 0.986        | 0.956        | 1.013        | 0.978        | 0.983         | 1.050         | 0.965         | E9PB61       | ALYREF    | THO complex subunit 4                                   |
| 0.992           | 1.007        | 0.950        | 0.957        | 0.932        | 0.987        | 0.924        | 0.901        | 0.960        | 1.023         | 0.994         | 1.016         | Q13769       | THOC5     | THO complex subunit 5 homolog                           |
| 1.018           | 1.028        | 1.001        | 0.971        | 0.982        | 0.996        | 0.998        | 1.045        | 0.998        | 0.968         | 1.002         | 0.976         | Q86W42       | THOC6     | THO complex subunit 6 homolog                           |
| 1.094           | 0.975        | 1.048        | 1.037        | 0.914        | 1.015        | 0.978        | 0.888        | 0.928        | 0.987         | 0.976         | 0.975         | Q6I9Y2       | THOC7     | THO complex subunit 7 homolog                           |
| 1.062           | 1.010        | 1.019        | 1.034        | 0.957        | 0.991        | 0.993        | 1.174        | 1.019        | 0.910         | 0.961         | 1.028         | Q9H6P5       | TASP1     | Threonine aspartase 1                                   |
| 1.012           | 1.159        | 0.999        | 1.005        | 0.877        | 0.955        | 1.027        | 0.941        | 1.066        | 0.967         | 0.821         | 1.001         | Q8IYQ7       | THNSL1    | Threonine synthase-like 1                               |
| 0.963           | 1.006        | 0.978        | 0.979        | 1.015        | 0.944        | 0.980        | 0.949        | 0.990        | 0.967         | 0.943         | 0.952         | P26639       | TARS      | Threonine--tRNA ligase, cytoplasmic                     |
| 1.008           | 1.003        | 1.025        | 1.029        | 0.989        | 1.049        | 1.014        | 1.042        | 1.055        | 1.036         | 0.988         | 1.037         | Q9BW92       | TARS2     | Threonine--tRNA ligase, mitochondrial                   |
| 1.005           | 1.006        | 1.069        | 1.023        | 0.970        | 1.015        | 1.035        | 1.042        | 1.015        | 1.041         | 1.014         | 1.113         | Q5VV42       | CDKAL1    | Threonylcarbamoyladenosine tRNA methylthiotransferase   |
| 0.935           | 0.942        | 1.046        | 0.960        | 0.959        | 0.995        | 1.030        | 1.017        | 1.051        | 1.096         | 1.056         | 1.050         | Q6ZMP0       | THSD4     | Thrombospondin type-1 domain-containing protein 4       |
| 0.940           | 1.020        | 1.107        | 1.070        | 1.074        | 1.151        | 1.038        | 1.140        | 1.013        | 1.071         | 1.252         | 1.107         | P07996       | THBS1     | Thrombospondin-1                                        |
| 1.026           | 1.009        | 0.997        | 0.994        | 1.088        | 0.988        | 1.006        | 1.001        | 1.011        | 0.990         | 1.039         | 0.976         | Q9NXG2       | THUMPD1   | THUMP domain-containing protein 1                       |
| 1.109           | 1.006        | 1.195        | 0.908        | 0.942        | 1.009        | 1.147        | 0.994        | 0.972        | 0.787         | 0.906         | 0.989         | Q9BTF0       | THUMPD2   | THUMP domain-containing protein 2                       |
| 1.013           | 0.995        | 1.012        | 0.960        | 0.987        | 1.005        | 1.011        | 1.088        | 1.029        | 0.995         | 1.023         | 1.025         | Q9BV44       | THUMPD3   | THUMP domain-containing protein 3                       |
| 0.915           | 0.997        | 0.987        | 0.928        | 0.947        | 0.932        | 1.029        | 1.115        | 0.994        | 0.884         | 0.841         | 1.077         | P04183       | TK1       | Thymidine kinase, cytosolic                             |
| 1.068           | 1.022        | 1.082        | 1.012        | 1.061        | 1.069        | 1.017        | 1.066        | 1.064        | 1.039         | 1.011         | 1.065         | P19971       | TYMP      | Thymidine phosphorylase                                 |
| 1.028           | 1.020        | 1.007        | 0.994        | 1.021        | 1.001        | 0.979        | 1.016        | 1.020        | 0.968         | 0.963         | 0.944         | P23919       | DTYMK     | Thymidylate kinase                                      |
| 0.949           | 1.012        | 1.008        | 1.003        | 0.810        | 1.153        |              |              |              | 0.776         | 0.968         | 1.093         | P04818       | TYMS      | Thymidylate synthase                                    |

| Abundance Ratio |              |              |              |              |              |              |              |              |               |               |               | Accession ID | Gene name | Protein Description                                        |
|-----------------|--------------|--------------|--------------|--------------|--------------|--------------|--------------|--------------|---------------|---------------|---------------|--------------|-----------|------------------------------------------------------------|
| 1 d<br>M1/C1    | 1 d<br>M2/C2 | 1 d<br>M3/C3 | 4 d<br>M1/C1 | 4 d<br>M2/C2 | 4 d<br>M3/C3 | 7 d<br>M1/C1 | 7 d<br>M2/C2 | 7 d<br>M3/C3 | 10 d<br>M1/C1 | 10 d<br>M2/C2 | 10 d<br>M3/C3 |              |           |                                                            |
| 1.023           | 0.964        | 1.013        | 0.956        | 0.997        | 1.024        | 0.958        | 0.901        | 0.964        | 1.010         | 0.959         | 0.994         | Q9P016       | THYN1     | Thymocyte nuclear protein 1                                |
| 0.954           | 0.868        | 0.941        | 0.924        | 0.904        | 0.919        | 1.084        | 0.561        | 0.883        | 1.259         | 0.912         | 1.196         | P63313       | TMSB10    | Thymosin beta-10                                           |
| 1.002           | 1.052        | 0.989        | 1.010        | 0.959        | 1.022        | 1.029        | 1.150        | 1.028        | 0.962         | 0.941         | 1.041         | Q6YHU6       | THADA     | Thyroid adenoma-associated protein                         |
| 0.981           | 0.998        | 0.979        | 0.989        | 0.976        | 0.993        | 0.989        | 0.929        | 0.960        | 1.051         | 1.019         | 1.030         | Q9Y2W1       | THRAP3    | Thyroid hormone receptor-associated protein 3              |
| 0.964           | 0.965        | 1.041        | 0.989        | 0.966        | 1.019        | 1.004        | 0.990        | 0.988        | 1.033         | 0.992         | 1.116         | Q15643       | TRIP11    | Thyroid receptor-interacting protein 11                    |
| 0.938           | 0.991        | 1.063        | 0.985        | 1.052        | 0.989        | 0.952        | 0.881        | 0.984        | 0.987         | 1.002         | 1.056         | Q15654       | TRIP6     | Thyroid receptor-interacting protein 6                     |
| 0.983           | 0.976        | 1.033        | 1.084        | 0.960        | 0.990        | 0.977        | 1.039        | 0.984        | 0.973         | 1.042         | 0.993         | Q9P031       | CCDC59    | Thyroid transcription factor 1-associated protein 26       |
| 0.992           | 1.000        | 0.994        | 0.987        | 0.971        | 1.002        | 1.040        | 0.990        | 0.972        | 1.044         | 0.985         | 1.058         | G5E9E7       | TJP1      | Tight junction protein 1 (Zona occludens 1), isoform CRA_e |
| 1.008           | 1.039        | 1.012        | 1.043        | 0.999        | 1.024        | 1.090        | 1.058        | 0.999        | 1.065         | 0.940         | 1.126         | A0A1B0GTW1   | TJP2      | Tight junction protein ZO-2                                |
| 0.989           | 0.929        | 1.036        | 0.952        | 0.943        | 1.023        | 0.965        | 0.927        | 0.999        | 1.014         | 0.992         | 1.092         | Q5JTD0       | TJAP1     | Tight junction-associated protein 1                        |
| 0.998           | 0.972        | 0.993        | 1.092        | 1.034        | 1.135        | 1.053        | 1.033        | 1.026        | 1.041         | 1.067         | 1.196         | Q9BVGW5      | TIPIN     | TIMELESS-interacting protein                               |
| 1.057           | 0.994        | 1.017        | 1.033        | 1.061        | 0.996        | 1.066        | 0.965        | 0.978        | 1.052         | 1.025         | 0.988         | O75663       | TIPRL     | TIP41-like protein                                         |
| 1.045           | 0.997        | 1.026        | 0.953        | 0.984        | 1.105        |              |              |              |               |               |               | Q8IUC6       | TICAM1    | TIR domain-containing adapter molecule 1                   |
| 1.006           | 0.996        | 0.993        | 1.001        | 1.008        | 0.976        | 0.997        | 1.017        | 0.982        | 1.005         | 0.971         | 0.959         | P04066       | FUCA1     | Tissue alpha-L-fucosidase                                  |
| 1.415           | 0.839        | 1.106        | 1.049        | 1.452        | 0.890        | 1.066        | 0.706        | 1.002        | 0.840         | 0.976         | 0.821         | P48307       | TFPI2     | Tissue factor pathway inhibitor 2                          |
| 0.990           | 0.941        | 0.942        | 0.897        | 0.866        | 0.897        | 1.014        | 1.036        | 0.862        | 0.904         | 0.864         | 0.954         | P10646       | TFPI      | Tissue factor pathway inhibitor                            |
| 0.912           | 0.949        | 0.850        | 0.997        | 0.827        | 1.095        | 1.041        | 1.020        | 0.965        | 1.105         | 0.986         | 1.059         | A0A0A0MTS7   | TTN       | Titin                                                      |
|                 |              |              |              |              |              | 1.119        | 1.207        | 1.384        |               |               |               | A6NGC4       | TLCD2     | TLC domain-containing protein 2                            |
| 0.969           | 0.934        | 1.118        | 1.042        | 0.888        | 1.060        | 0.904        | 0.725        | 0.957        | 1.085         | 0.984         | 1.093         | Q6P9B6       | TLDC1     | TLD domain-containing protein 1                            |
|                 |              |              |              |              |              |              |              |              | 1.109         | 1.099         | 1.150         | J3KPA2       | TM2D1     | TM2 domain containing 1, isoform CRA_c                     |
|                 |              |              |              |              |              | 0.843        | 1.088        | 1.170        |               |               |               | Q13114       | TRAF3     | TNF receptor-associated factor 3                           |
| 0.923           | 1.013        | 0.999        | 1.023        | 0.997        | 1.008        | 1.017        | 0.994        | 1.038        | 1.189         | 1.031         | 0.896         | Q9Y4K3       | TRAF6     | TNF receptor-associated factor 6                           |
| 0.979           | 0.950        | 1.126        | 0.995        | 0.946        | 1.056        | 1.103        | 1.083        | 1.059        | 0.829         | 0.804         | 1.153         | Q15025       | TNIP1     | TNFAIP3-interacting protein 1                              |
| 1.042           | 0.978        | 1.019        | 1.008        | 1.004        | 1.057        | 1.041        | 1.013        | 1.019        | 1.027         | 0.980         | 1.042         | Q9H0E2       | TOLLIP    | Toll-interacting protein                                   |
| 1.014           | 1.003        | 1.063        | 0.982        | 0.899        | 0.999        | 1.035        | 0.915        | 1.074        | 1.026         | 0.929         | 1.058         | O60603       | TLR2      | Toll-like receptor 2                                       |
| 1.070           | 1.077        | 1.034        | 0.949        | 0.984        | 1.046        | 1.027        | 1.135        | 1.017        | 1.015         | 1.030         | 1.052         | O15455       | TLR3      | Toll-like receptor 3                                       |
| 1.123           | 0.954        | 0.988        | 1.023        | 0.977        | 1.022        | 1.047        | 1.080        | 1.012        | 1.047         | 1.019         | 1.021         | O75674       | TOM1L1    | TOM1-like protein 1                                        |
| 1.026           | 0.983        | 0.994        | 1.004        | 0.967        | 1.015        | 1.010        | 1.075        | 1.024        | 1.019         | 0.990         | 1.023         | Q6ZVM7       | TOM1L2    | TOM1-like protein 2                                        |
| 0.962           | 1.012        | 1.025        | 1.000        | 1.012        | 1.028        | 1.019        | 0.865        | 0.952        | 1.010         | 0.972         | 1.033         | Q96HA7       | TONSL     | Tonsoku-like protein                                       |
| 0.959           | 0.990        | 1.011        | 1.020        | 0.969        | 1.055        | 1.042        | 1.056        | 0.987        | 1.050         | 0.980         | 1.014         | O14656       | TOR1A     | Torsin-1A                                                  |
| 0.963           | 0.991        | 1.020        | 0.988        | 1.036        | 0.984        | 0.995        | 0.915        | 1.001        | 1.036         | 1.000         | 1.048         | Q5JTV8       | TOR1AIP1  | Torsin-1A-interacting protein 1                            |
| 0.968           | 0.986        | 1.032        | 0.969        | 0.985        | 1.029        | 1.013        | 0.963        | 1.029        | 1.052         | 0.989         | 1.105         | Q8NFQ8       | TOR1AIP2  | Torsin-1A-interacting protein 2                            |
| 1.062           | 0.906        | 1.004        |              |              |              |              |              |              |               |               |               | Q9H496       | TOR1AIP2  | Torsin-1A-interacting protein 2, isoform IFRG15            |

| Abundance Ratio |              |              |              |              |              |              |              |              |               |               |               | Accession ID | Gene name | Protein Description                                           |
|-----------------|--------------|--------------|--------------|--------------|--------------|--------------|--------------|--------------|---------------|---------------|---------------|--------------|-----------|---------------------------------------------------------------|
| 1 d<br>M1/C1    | 1 d<br>M2/C2 | 1 d<br>M3/C3 | 4 d<br>M1/C1 | 4 d<br>M2/C2 | 4 d<br>M3/C3 | 7 d<br>M1/C1 | 7 d<br>M2/C2 | 7 d<br>M3/C3 | 10 d<br>M1/C1 | 10 d<br>M2/C2 | 10 d<br>M3/C3 |              |           |                                                               |
| 1.036           | 1.053        | 1.033        | 1.032        | 0.990        | 1.019        | 1.067        | 1.145        | 1.024        | 0.964         | 1.000         | 1.046         | O14657       | TOR1B     | Torsin-1B                                                     |
| 0.936           | 1.152        | 0.948        | 0.950        | 0.903        | 1.160        | 0.927        | 1.071        | 0.920        | 0.923         | 0.912         | 1.110         | Q5JU69       | TOR2A     | Torsin-2A                                                     |
| 1.023           | 1.006        | 1.045        | 1.014        | 1.011        | 1.034        | 1.129        | 1.118        | 1.089        | 1.236         | 1.041         | 1.184         | Q9H497       | TOR3A     | Torsin-3A                                                     |
| 1.042           | 1.022        | 1.045        | 1.034        | 0.921        | 1.014        | 1.064        | 1.111        | 1.033        | 1.068         | 1.000         | 1.069         | Q9NXH8       | TOR4A     | Torsin-4A                                                     |
| 1.056           | 1.005        | 0.995        | 1.002        | 0.978        | 0.950        | 1.003        | 1.101        | 1.016        | 0.993         | 1.040         | 0.994         | O94842       | TOX4      | TOX high mobility group box family member 4                   |
| 0.878           | 0.939        | 0.908        | 0.940        | 0.993        | 0.969        | 0.992        | 0.949        | 1.043        | 1.036         | 1.133         | 1.029         | O43715       | TRIAP1    | TP53-regulated inhibitor of apoptosis 1                       |
| 1.057           | 1.037        | 1.056        | 1.012        | 1.058        | 1.046        | 1.022        | 0.983        | 1.037        | 0.965         | 0.995         | 1.025         | Q96S44       | TP53RK    | TP53-regulating kinase                                        |
| 0.981           | 0.980        | 0.969        | 0.996        | 0.952        | 1.041        | 1.041        | 0.965        | 1.005        | 0.985         | 0.968         | 1.026         | J3KPT4       | TRABD     | TraB domain-containing protein                                |
| 1.057           | 1.015        | 1.044        | 0.948        | 0.958        | 1.014        | 0.963        | 0.969        | 0.955        | 0.980         | 0.963         | 0.965         | Q92844       | TANK      | TRAF family member-associated NF-kappa-B activator            |
| 1.082           | 0.972        | 1.026        | 0.848        | 0.931        | 1.022        | 1.013        | 0.965        | 1.082        | 1.035         | 1.014         | 1.171         | Q8TDR0       | TRAF3IP1  | TRAF3-interacting protein 1                                   |
| 1.156           | 1.040        | 1.133        |              |              |              | 0.892        | 1.003        | 0.748        |               |               |               | O60296       | TRAK2     | Trafficking kinesin-binding protein 2                         |
| 1.051           | 0.997        | 0.957        | 1.105        | 1.047        | 0.914        | 0.949        | 1.079        | 1.024        | 0.916         | 1.024         | 0.918         | Q9Y5R8       | TRAPPC1   | Trafficking protein particle complex subunit 1                |
| 1.038           | 1.019        | 1.036        | 0.962        | 0.924        | 1.020        | 0.945        | 1.015        | 1.041        | 1.009         | 0.988         | 1.114         | P48553       | TRAPPC10  | Trafficking protein particle complex subunit 10               |
| 1.052           | 1.024        | 1.041        | 0.995        | 0.942        | 1.002        | 0.935        | 1.048        | 0.992        | 0.947         | 0.986         | 0.964         | Q7Z392       | TRAPPC11  | Trafficking protein particle complex subunit 11               |
| 1.020           | 0.972        | 1.081        | 1.007        | 0.975        | 1.042        | 0.995        | 1.013        | 1.041        | 1.000         | 0.994         | 1.041         | Q8WVT3       | TRAPPC12  | Trafficking protein particle complex subunit 12               |
| 0.974           | 1.003        | 0.981        | 1.013        | 0.993        | 1.032        | 1.030        | 1.051        | 0.983        | 1.103         | 1.029         | 0.995         | H3BP13       | TRAPPC2L  | Trafficking protein particle complex subunit 2-like protein   |
| 0.993           | 0.942        | 1.006        | 0.994        | 0.846        | 1.156        | 1.066        | 1.003        | 1.035        | 1.092         | 1.115         | 1.077         | O43617       | TRAPPC3   | Trafficking protein particle complex subunit 3                |
| 1.060           | 0.989        | 1.022        | 1.026        | 0.995        | 1.040        | 1.015        | 1.119        | 1.031        | 0.977         | 0.978         | 1.005         | Q9Y296       | TRAPPC4   | Trafficking protein particle complex subunit 4                |
| 0.981           | 1.011        | 1.027        | 1.034        | 1.028        | 1.041        | 1.005        | 1.051        | 0.993        | 1.011         | 1.045         | 1.017         | Q8IUR0       | TRAPPC5   | Trafficking protein particle complex subunit 5                |
| 1.032           | 1.105        | 1.070        | 0.966        | 1.011        | 1.088        | 1.016        | 1.080        | 1.102        | 0.993         | 0.999         | 1.013         | Q86SZ2       | TRAPPC6B  | Trafficking protein particle complex subunit 6B               |
| 1.032           | 0.992        | 1.000        | 1.038        | 1.016        | 1.057        | 1.049        | 0.998        | 1.051        | 1.035         | 0.992         | 1.037         | Q9Y2L5       | TRAPPC8   | Trafficking protein particle complex subunit 8                |
|                 |              |              |              |              |              |              |              |              | 1.235         | 0.972         | 1.429         | Q96CG3       | TIFA      | TRAF-interacting protein with FHA domain-containing protein A |
| 1.008           | 0.981        | 1.144        | 1.034        | 1.004        | 0.862        | 0.856        | 0.611        | 0.802        | 1.088         | 1.099         | 1.103         | O14545       | TRAFFD1   | TRAF-type zinc finger domain-containing protein 1             |
| 0.989           | 1.007        | 1.086        | 0.985        | 0.962        | 1.025        | 1.002        | 0.994        | 1.034        | 1.040         | 0.976         | 1.065         | Q96EM0       | L3HYDPH   | Trans-3-hydroxy-L-proline dehydratase                         |
| 0.991           | 1.004        | 0.994        | 1.015        | 1.026        | 1.037        | 1.004        | 1.001        | 1.021        | 1.051         | 0.990         | 0.996         | P37837       | TALDO1    | Transaldolase                                                 |
| 1.048           | 0.998        | 1.002        | 0.937        | 0.968        | 0.998        | 1.017        | 1.038        | 0.994        | 0.975         | 0.995         | 0.954         | Q9NPA8       | ENY2      | Transcription and mRNA export factor ENY2                     |
| 0.952           | 1.007        | 0.950        | 1.003        | 1.118        | 1.207        | 0.679        | 1.296        | 0.971        | 0.891         | 1.282         | 1.118         | G5E9M7       | VGLL4     | Transcription cofactor vestigial-like protein 4               |
|                 |              |              |              |              |              |              |              |              | 0.943         | 1.003         | 1.023         | K7EMV4       | ELOF1     | Transcription elongation factor 1 homolog                     |
| 0.990           | 1.005        | 0.995        | 1.001        | 1.050        | 1.023        | 1.017        | 0.938        | 1.027        | 0.993         | 0.983         | 1.062         | P23193       | TCEA1     | Transcription elongation factor A protein 1                   |
| 0.960           | 0.924        | 1.011        |              |              |              |              |              |              |               |               |               | Q15560       | TCEA2     | Transcription elongation factor A protein 2                   |
| 0.998           | 0.977        | 1.048        | 0.958        | 0.974        | 0.999        | 0.878        | 0.696        | 0.944        | 1.006         | 1.056         | 1.134         | Q969E4       | TCEAL3    | Transcription elongation factor A protein-like 3              |

| Abundance Ratio |              |              |              |              |              |              |              |              |               |               |               | Accession ID | Gene name | Protein Description                                                                          |
|-----------------|--------------|--------------|--------------|--------------|--------------|--------------|--------------|--------------|---------------|---------------|---------------|--------------|-----------|----------------------------------------------------------------------------------------------|
| 1 d<br>M1/C1    | 1 d<br>M2/C2 | 1 d<br>M3/C3 | 4 d<br>M1/C1 | 4 d<br>M2/C2 | 4 d<br>M3/C3 | 7 d<br>M1/C1 | 7 d<br>M2/C2 | 7 d<br>M3/C3 | 10 d<br>M1/C1 | 10 d<br>M2/C2 | 10 d<br>M3/C3 |              |           |                                                                                              |
| 1.072           | 1.006        | 0.925        |              |              |              | 0.904        | 1.312        | 1.081        |               |               |               | Q9UHQ7       | TCEAL9    | Transcription elongation factor A protein-like 9                                             |
| 1.660           | 1.074        | 1.241        | 1.174        | 1.353        | 0.828        | 0.855        | 0.867        | 0.955        | 0.776         | 0.964         | 0.775         | P63272       | SUPT4H1   | Transcription elongation factor SPT4                                                         |
| 1.001           | 1.007        | 1.016        | 0.982        | 0.957        | 1.015        | 0.990        | 0.995        | 0.984        | 0.969         | 0.984         | 0.997         | O00267       | SUPT5H    | Transcription elongation factor SPT5                                                         |
| 1.032           | 1.012        | 1.021        | 1.037        | 0.988        | 1.018        | 1.024        | 1.047        | 1.010        | 0.979         | 0.988         | 1.029         | Q7KZ85       | SUPT6H    | Transcription elongation factor SPT6                                                         |
| 0.982           | 0.951        | 1.020        | 0.966        | 0.912        | 1.014        | 0.992        | 0.981        | 0.958        | 0.987         | 0.987         | 0.958         | Q96QE5       | TEFM      | Transcription elongation factor, mitochondrial                                               |
| 1.042           | 1.009        | 0.998        | 1.000        | 0.980        | 1.005        | 1.006        | 1.024        | 0.990        | 1.014         | 1.007         | 0.980         | O14776       | TCERG1    | Transcription elongation regulator 1                                                         |
| 1.299           | 1.069        | 0.888        |              |              |              |              |              |              |               |               |               | A0A0G2JIJ7   | TCF19     | Transcription factor 19                                                                      |
| 0.966           | 1.024        | 1.010        | 0.970        | 0.944        | 1.080        | 0.967        | 0.965        | 0.985        | 1.018         | 0.998         | 1.066         | Q9UGU0       | TCF20     | Transcription factor 20                                                                      |
| 1.002           | 1.004        | 1.043        | 0.994        | 1.076        | 0.994        | 1.006        | 0.960        | 1.021        | 1.052         | 0.973         | 1.061         | Q9BQ70       | TCF25     | Transcription factor 25                                                                      |
| 1.035           | 0.993        | 0.983        | 1.007        | 0.967        | 0.993        | 0.974        | 0.913        | 0.931        | 0.986         | 0.990         | 0.948         | Q00059       | TFAM      | Transcription factor A, mitochondrial                                                        |
| 0.904           | 1.057        | 0.996        | 1.020        | 0.854        | 0.965        | 1.043        | 0.960        | 1.053        | 1.052         | 0.947         | 1.105         | P05412       | JUN       | Transcription factor AP-1                                                                    |
| 1.011           | 1.006        | 1.009        | 0.999        | 0.981        | 1.004        | 1.000        | 1.056        | 0.989        | 0.999         | 1.047         | 1.024         | Q96SH1       | TFAP2A    | Transcription factor AP-2 alpha (Activating enhancer binding protein 2 alpha), isoform CRA_c |
|                 |              |              |              |              |              | 0.972        | 1.006        | 0.990        | 1.026         | 0.969         | 1.039         | Q92754       | TFAP2C    | Transcription factor AP-2 gamma                                                              |
|                 |              |              | 0.900        | 0.825        | 1.045        |              |              |              | 1.070         | 1.045         | 0.979         | Q726R9       | TFAP2D    | Transcription factor AP-2-delta                                                              |
| 0.900           | 0.941        | 0.997        | 0.900        | 0.875        | 0.991        | 0.891        | 0.865        | 0.983        | 1.072         | 1.013         | 0.880         | Q01664       | TFAP4     | Transcription factor AP-4                                                                    |
| 1.010           | 0.999        | 1.000        | 1.002        | 0.937        | 0.990        | 0.950        | 1.040        | 0.972        | 0.846         | 0.989         | 0.845         | Q96K17       | BTF3L4    | Transcription factor BTF3 homolog 4                                                          |
| 1.023           | 0.985        | 1.018        | 0.990        | 0.948        | 1.007        | 0.957        | 1.024        | 0.985        | 0.925         | 1.019         | 0.929         | P20290       | BTF3      | Transcription factor BTF3                                                                    |
| 0.989           | 0.992        | 1.000        | 0.908        | 0.848        | 1.077        | 0.979        | 1.093        | 1.058        | 1.003         | 0.976         | 1.069         | Q14186       | TFDP1     | Transcription factor Dp-1                                                                    |
| 0.938           | 0.817        | 0.963        | 0.923        | 1.284        | 0.894        | 1.389        | 1.014        | 0.734        |               |               |               | X6REB3       | TCF3      | Transcription factor E2-alpha                                                                |
| 0.960           | 0.771        | 1.131        | 0.871        | 0.896        | 1.104        | 1.010        | 1.104        | 1.218        | 0.915         | 0.972         | 1.181         | O00716       | E2F3      | Transcription factor E2F3                                                                    |
| 1.092           | 1.017        | 0.989        | 1.046        | 1.061        | 1.000        | 1.018        | 0.924        | 1.070        | 1.018         | 0.959         | 1.049         | Q16254       | E2F4      | Transcription factor E2F4                                                                    |
| 0.983           | 1.035        | 1.088        | 1.021        | 0.978        | 1.002        | 0.986        | 0.905        | 1.009        | 1.081         | 1.010         | 1.114         | P19532       | TFE3      | Transcription factor E3                                                                      |
| 0.979           | 1.098        | 1.026        | 1.034        | 1.091        | 0.953        | 0.965        | 1.297        | 0.977        | 0.895         | 1.036         | 0.926         | P41212       | ETV6      | Transcription factor ETV6                                                                    |
| 1.070           | 0.837        | 1.030        |              |              |              |              |              |              |               |               |               | Q9Y543       | HES2      | Transcription factor HES-2                                                                   |
|                 |              |              | 0.997        | 0.787        | 1.137        | 0.944        | 1.093        | 1.075        | 0.946         | 1.002         | 0.943         | P31629       | HIVEP2    | Transcription factor HIVEP2                                                                  |
|                 |              |              |              |              |              | 0.860        | 0.650        | 1.147        |               |               |               | Q9HAW0       | BRF2      | Transcription factor IIIB 50 kDa subunit                                                     |
| 0.938           | 1.039        | 0.975        | 1.083        | 0.923        | 0.971        |              |              |              | 1.133         | 1.112         | 1.300         | Q92994       | BRF1      | Transcription factor IIIB 90 kDa subunit                                                     |
|                 |              |              |              |              |              | 1.003        | 1.077        | 1.023        | 1.046         | 1.229         | 0.861         | P17275       | JUNB      | Transcription factor jun-B                                                                   |
| 1.716           | 0.846        | 0.942        | 1.280        | 0.906        | 1.011        | 1.431        | 1.083        | 0.987        | 1.253         | 0.969         | 1.008         | P17535       | JUND      | Transcription factor jun-D                                                                   |
| 0.967           | 1.009        | 1.071        | 1.051        | 0.880        | 1.072        | 1.013        | 1.253        | 1.021        | 0.924         | 0.963         | 0.948         | Q9ULX9       | MAFF      | Transcription factor MafF                                                                    |
| 0.954           | 1.003        | 1.030        | 1.033        | 0.918        | 1.077        | 1.173        | 1.135        | 1.022        | 0.969         | 1.035         | 0.997         | O15525       | MAFG      | Transcription factor MafG                                                                    |
|                 |              |              | 1.043        | 0.901        | 1.069        | 1.055        | 1.055        | 0.975        | 0.960         | 1.065         | 1.050         | O60675       | MAFK      | Transcription factor MafK                                                                    |
| 1.029           | 1.000        | 0.986        | 1.018        | 0.959        | 1.014        | 1.014        | 1.006        | 1.020        | 1.025         | 0.992         | 1.040         | Q04206       | RELA      | Transcription factor p65                                                                     |



| Abundance Ratio |              |              |              |              |              |              |              |              |               |               |               | Accession ID | Gene name | Protein Description                                 |
|-----------------|--------------|--------------|--------------|--------------|--------------|--------------|--------------|--------------|---------------|---------------|---------------|--------------|-----------|-----------------------------------------------------|
| 1 d<br>M1/C1    | 1 d<br>M2/C2 | 1 d<br>M3/C3 | 4 d<br>M1/C1 | 4 d<br>M2/C2 | 4 d<br>M3/C3 | 7 d<br>M1/C1 | 7 d<br>M2/C2 | 7 d<br>M3/C3 | 10 d<br>M1/C1 | 10 d<br>M2/C2 | 10 d<br>M3/C3 |              |           |                                                     |
| 1.048           | 1.106        | 1.058        | 1.013        | 0.904        | 0.994        | 1.040        | 1.132        | 1.022        | 1.043         | 0.997         | 1.048         | Q01201       | RELB      | Transcription factor RelB                           |
|                 |              |              | 0.721        | 1.561        | 1.070        | 0.926        | 0.636        | 0.960        |               |               |               | P35716       | SOX11     | Transcription factor SOX-11                         |
| 1.105           | 0.878        | 1.172        | 1.014        | 0.907        | 1.147        | 0.988        | 0.858        | 1.043        | 1.155         | 1.037         | 1.158         | Q9Y651       | SOX21     | Transcription factor SOX-21                         |
| 0.770           | 1.312        | 0.906        |              |              |              |              |              |              |               |               |               | P48436       | SOX9      | Transcription factor SOX-9                          |
| 0.930           | 0.956        | 0.955        | 0.951        | 0.921        | 0.980        | 1.174        | 0.763        | 1.091        | 1.069         | 1.016         | 1.111         | P08047       | SP1       | Transcription factor Sp1                            |
|                 |              |              | 1.068        | 1.123        | 1.261        | 0.925        | 1.163        | 1.238        |               |               |               | Q02086       | SP2       | Transcription factor Sp2                            |
| 1.004           | 1.037        | 0.999        | 1.022        | 0.936        | 0.956        | 1.026        | 1.023        | 0.967        | 1.101         | 1.001         | 1.129         | Q02447       | SP3       | Transcription factor Sp3                            |
|                 |              |              |              |              |              |              |              |              | 1.133         | 1.003         | 1.185         | Q02446       | SP4       | Transcription factor Sp4                            |
| 0.829           | 1.016        | 0.820        | 1.051        | 0.618        | 1.356        | 1.395        | 1.183        | 1.071        | 1.192         | 1.139         | 0.822         | A0A0G2JNU3   | BDP1      | Transcription factor TFIIB component B'' homolog    |
| 0.980           | 1.039        | 1.069        |              |              |              | 1.257        | 0.845        | 1.096        | 0.990         | 0.936         | 1.171         | P52655       | GTF2A1    | Transcription initiation factor IIA subunit 1       |
| 0.986           | 0.997        | 0.979        | 1.021        | 0.954        | 1.109        | 0.927        | 1.036        | 0.998        | 0.964         | 1.020         | 1.085         | P52657       | GTF2A2    | Transcription initiation factor IIA subunit 2       |
| 1.027           | 0.976        | 1.023        | 1.021        | 0.953        | 1.036        | 1.059        | 1.037        | 1.047        | 1.020         | 1.005         | 1.026         | Q00403       | GTF2B     | Transcription initiation factor IIB                 |
| 1.045           | 0.962        | 1.013        | 1.008        | 0.978        | 1.039        | 1.024        | 1.050        | 1.034        | 1.011         | 0.999         | 1.027         | P29084       | GTF2E2    | Transcription initiation factor IIE subunit beta    |
| 1.150           | 0.997        | 1.055        | 1.026        | 0.981        | 0.999        | 1.038        | 0.980        | 0.993        | 0.973         | 0.991         | 0.973         | Q12962       | TAF10     | Transcription initiation factor TFIID subunit 10    |
| 0.997           | 0.972        | 1.070        | 0.781        | 1.089        | 1.111        | 0.953        | 0.957        | 1.003        |               |               |               | Q16514       | TAF12     | Transcription initiation factor TFIID subunit 12    |
| 0.997           | 1.019        | 1.073        | 0.972        | 1.143        | 1.077        | 1.008        | 1.045        | 1.091        | 1.002         | 1.036         | 0.949         | Q6P1X5       | TAF2      | Transcription initiation factor TFIID subunit 2     |
|                 |              |              |              |              |              | 1.059        | 0.915        | 0.902        |               |               |               | Q5VWG9       | TAF3      | Transcription initiation factor TFIID subunit 3     |
| 1.001           | 0.993        | 1.057        | 0.998        | 1.091        | 1.008        | 0.986        | 1.117        | 1.056        | 0.995         | 0.961         | 1.096         | O00268       | TAF4      | Transcription initiation factor TFIID subunit 4     |
| 1.045           | 1.016        | 1.019        | 0.944        | 0.967        | 1.034        | 0.912        | 1.088        | 1.021        | 0.990         | 0.910         | 1.011         | Q15542       | TAF5      | Transcription initiation factor TFIID subunit 5     |
| 0.976           | 0.957        | 1.018        | 1.021        | 0.895        | 1.035        | 0.953        | 1.089        | 1.048        | 1.017         | 1.031         | 1.067         | J3KR72       | TAF6      | Transcription initiation factor TFIID subunit 6     |
| 1.028           | 0.979        | 0.957        | 0.999        | 0.901        | 1.068        | 0.992        | 1.068        | 1.072        | 0.975         | 0.968         | 1.018         | Q15545       | TAF7      | Transcription initiation factor TFIID subunit 7     |
|                 |              |              | 0.920        | 0.954        | 0.992        | 0.966        | 1.177        | 1.002        | 0.826         | 0.972         | 0.902         | Q16594       | TAF9      | Transcription initiation factor TFIID subunit 9     |
| 1.003           | 1.028        | 1.048        | 0.992        | 0.889        | 1.116        | 1.083        | 1.131        | 1.051        | 1.001         | 0.983         | 1.099         | Q9HBM6       | TAF9B     | Transcription initiation factor TFIID subunit 9B    |
| 0.946           | 0.980        | 0.962        | 0.935        | 0.929        | 0.902        | 1.047        | 1.127        | 0.906        |               |               |               | O75486       | SUPT3H    | Transcription initiation protein SPT3 homolog       |
| 1.031           | 1.012        | 0.985        | 0.956        | 0.876        | 1.044        | 0.991        | 0.981        | 1.018        | 1.032         | 1.004         | 1.063         | O15164       | TRIM24    | Transcription intermediary factor 1-alpha           |
| 1.015           | 0.970        | 1.072        | 0.930        | 1.076        | 1.109        | 0.854        | 0.952        | 1.032        | 1.026         | 1.090         | 1.108         | M0R0K9       | TRIM28    | Transcription intermediary factor 1-beta (Fragment) |
| 1.014           | 0.998        | 1.004        | 0.985        | 1.020        | 0.985        | 0.983        | 0.943        | 0.987        | 0.988         | 1.010         | 1.012         | Q13263       | TRIM28    | Transcription intermediary factor 1-beta            |
| 0.966           | 1.003        | 1.122        | 0.877        | 0.925        | 1.179        | 1.104        | 1.138        | 0.998        | 0.995         | 1.000         | 0.840         | O14867       | BACH1     | Transcription regulator protein BACH1               |
| 0.986           | 1.000        | 1.049        | 0.717        | 1.023        | 1.181        | 0.841        | 1.228        | 0.954        |               |               |               | Q15361       | TTF1      | Transcription termination factor 1                  |
| 1.149           | 1.004        | 1.014        | 1.089        | 1.175        | 1.243        |              |              |              |               |               |               | Q99551       | MTERF1    | Transcription termination factor 1, mitochondrial   |
| 1.019           | 1.027        | 1.026        | 1.046        | 0.955        | 1.020        | 1.031        | 1.091        | 0.993        | 0.966         | 0.941         | 1.034         | Q9UNY4       | TTF2      | Transcription termination factor 2                  |

| Abundance Ratio |              |              |              |              |              |              |              |              |               |               |               | Accession ID | Gene name | Protein Description                                    |
|-----------------|--------------|--------------|--------------|--------------|--------------|--------------|--------------|--------------|---------------|---------------|---------------|--------------|-----------|--------------------------------------------------------|
| 1 d<br>M1/C1    | 1 d<br>M2/C2 | 1 d<br>M3/C3 | 4 d<br>M1/C1 | 4 d<br>M2/C2 | 4 d<br>M3/C3 | 7 d<br>M1/C1 | 7 d<br>M2/C2 | 7 d<br>M3/C3 | 10 d<br>M1/C1 | 10 d<br>M2/C2 | 10 d<br>M3/C3 |              |           |                                                        |
| 1.065           | 0.999        | 1.060        | 1.004        | 0.957        | 1.020        | 1.066        | 1.061        | 0.961        | 1.036         | 0.989         | 1.060         | Q96E29       | MTERF3    | Transcription termination factor 3, mitochondrial      |
| 1.068           | 0.999        | 1.067        | 0.943        | 0.957        | 1.012        | 0.973        | 0.963        | 0.915        | 1.114         | 1.066         | 1.050         | Q726M4       | MTERF4    | Transcription termination factor 4, mitochondrial      |
| 1.040           | 1.018        | 0.977        | 1.006        | 0.978        | 0.965        | 1.010        | 1.039        | 0.983        | 1.044         | 0.988         | 0.969         | Q00577       | PURA      | Transcriptional activator protein Pur-alpha            |
| 1.041           | 0.986        | 0.993        | 1.019        | 1.017        | 1.054        | 0.999        | 1.001        | 1.024        | 1.076         | 1.030         | 1.047         | Q96QR8       | PURB      | Transcriptional activator protein Pur-beta             |
| 0.995           | 0.967        | 1.056        | 1.010        | 1.054        | 0.954        | 0.986        | 1.126        | 1.013        | 1.004         | 0.917         | 1.232         | Q96BN2       | TADA1     | Transcriptional adapter 1                              |
| 1.025           | 0.988        | 1.021        | 1.028        | 0.877        | 0.908        | 0.978        | 1.115        | 1.033        | 1.015         | 1.033         | 1.003         | Q86TJ2       | TADA2B    | Transcriptional adapter 2-beta                         |
| 1.014           | 1.006        | 1.034        | 0.968        | 0.986        | 0.990        | 0.988        | 0.869        | 1.023        | 1.261         | 0.967         | 1.212         | O75528       | TADA3     | Transcriptional adapter 3                              |
| 1.025           | 0.982        | 1.041        | 1.012        | 0.891        | 0.999        | 0.924        | 1.036        | 0.976        | 0.940         | 0.957         | 1.024         | H0YE88       | TEAD1     | Transcriptional enhancer factor TEF-1                  |
| 1.148           | 1.032        | 1.045        | 1.169        | 1.514        | 1.281        |              |              |              | 0.899         | 1.144         | 0.910         | Q99594       | TEAD3     | Transcriptional enhancer factor TEF-5                  |
| 1.010           | 0.973        | 1.040        | 1.045        | 0.955        | 0.930        | 0.948        | 1.174        | 1.047        | 0.964         | 0.973         | 0.919         | Q5T5J6       | SWT1      | Transcriptional protein SWT1                           |
| 0.994           | 0.995        | 1.005        | 0.952        | 0.954        | 1.004        | 1.028        | 1.004        | 0.967        | 1.099         | 1.021         | 1.147         | P46100       | ATRX      | Transcriptional regulator ATRX                         |
| 0.937           | 0.955        | 1.033        | 1.013        | 1.011        | 1.016        | 0.988        | 0.902        | 1.026        | 1.064         | 1.029         | 1.145         | Q86T24       | ZBTB33    | Transcriptional regulator Kaiso                        |
| 0.923           | 1.022        | 0.968        | 1.025        | 1.056        | 0.979        | 1.072        | 0.934        | 0.969        | 1.035         | 0.985         | 1.004         | P49711       | CTCF      | Transcriptional repressor CTCF                         |
| 1.105           | 0.984        | 1.032        | 1.006        | 1.011        | 0.964        | 1.051        | 0.995        | 0.989        | 1.074         | 1.010         | 1.087         | Q12986       | NFX1      | Transcriptional repressor NF-X1                        |
| 1.038           | 1.010        | 1.029        | 0.999        | 0.992        | 0.976        | 1.038        | 1.076        | 0.997        | 1.013         | 1.000         | 1.063         | Q8WXI9       | GATAD2B   | Transcriptional repressor p66-beta                     |
| 1.072           | 1.047        | 0.995        | 1.040        | 1.003        | 0.952        | 1.151        | 1.054        | 0.982        | 1.092         | 1.031         | 1.050         | P25490       | YY1       | Transcriptional repressor protein YY1                  |
| 1.004           | 0.998        | 0.999        | 1.011        | 1.022        | 1.029        | 1.011        | 0.982        | 1.033        | 1.051         | 1.061         | 1.105         | Q9Y4P3       | TBL2      | Transducin beta-like protein 2                         |
| 1.015           | 0.997        | 1.056        | 0.973        | 0.973        | 1.015        | 0.996        | 0.997        | 1.052        | 0.972         | 1.020         | 0.995         | Q12788       | TBL3      | Transducin beta-like protein 3                         |
| 1.001           | 1.038        | 1.063        |              |              |              |              |              |              | 1.029         | 0.894         | 1.026         | Q04724       | TLE1      | Transducin-like enhancer protein 1                     |
| 0.977           | 1.002        | 0.975        | 0.967        | 0.951        | 1.017        | 1.037        | 1.038        | 1.038        | 1.018         | 1.021         | 1.004         | H0YL70       | TLE3      | Transducin-like enhancer protein 3                     |
| 0.782           | 0.810        | 0.802        | 0.605        | 0.562        | 0.594        | 0.641        | 0.720        | 0.648        | 0.630         | 0.693         | 0.672         | P02786       | TFRC      | Transferrin receptor protein 1                         |
| 1.021           | 1.004        | 1.036        | 1.001        | 0.937        | 1.027        | 0.955        | 1.120        | 1.007        | 1.006         | 0.994         | 0.991         | Q9Y4A5       | TRRAP     | Transformation/transcription domain-associated protein |
| 1.108           | 1.052        | 0.971        | 1.013        | 0.964        | 0.952        | 0.971        | 1.022        | 0.981        | 0.977         | 1.017         | 0.954         | Q13595       | TRA2A     | Transformer-2 protein homolog alpha                    |
| 1.061           | 0.994        | 1.027        | 0.987        | 0.924        | 0.951        | 0.943        | 0.965        | 0.961        | 0.933         | 1.011         | 0.931         | P62995       | TRA2B     | Transformer-2 protein homolog beta                     |
| 1.019           | 1.006        | 1.052        | 0.994        | 0.972        | 0.985        | 1.021        | 0.980        | 0.966        | 1.017         | 0.987         | 1.055         | O75410       | TACC1     | Transforming acidic coiled-coil-containing protein 1   |
| 0.988           | 0.941        | 1.057        | 0.961        | 0.987        | 1.017        | 0.974        | 0.997        | 1.006        | 0.982         | 0.930         | 1.056         | O95359       | TACC2     | Transforming acidic coiled-coil-containing protein 2   |
| 0.953           | 1.005        | 0.997        | 0.970        | 0.819        | 0.958        | 1.104        | 1.043        | 0.998        | 0.926         | 0.845         | 1.009         | Q9Y6A5       | TACC3     | Transforming acidic coiled-coil-containing protein 3   |
| 0.877           | 0.831        | 0.940        |              |              |              |              |              |              |               |               |               | Q03167       | TGFBR3    | Transforming growth factor beta receptor type 3        |
| 0.981           | 0.836        | 0.898        | 1.236        | 1.329        | 0.858        | 0.951        | 0.960        | 1.018        | 0.861         | 0.885         | 0.991         | P01137       | TGFB1     | Transforming growth factor beta-1                      |

| Abundance Ratio |              |              |              |              |              |              |              |              |               |               |               | Accession ID | Gene name | Protein Description                                              |
|-----------------|--------------|--------------|--------------|--------------|--------------|--------------|--------------|--------------|---------------|---------------|---------------|--------------|-----------|------------------------------------------------------------------|
| 1 d<br>M1/C1    | 1 d<br>M2/C2 | 1 d<br>M3/C3 | 4 d<br>M1/C1 | 4 d<br>M2/C2 | 4 d<br>M3/C3 | 7 d<br>M1/C1 | 7 d<br>M2/C2 | 7 d<br>M3/C3 | 10 d<br>M1/C1 | 10 d<br>M2/C2 | 10 d<br>M3/C3 |              |           |                                                                  |
| 0.976           | 1.077        | 0.996        | 1.003        | 1.160        | 0.973        | 1.041        | 0.811        | 1.024        | 1.033         | 0.976         | 1.039         | Q43294       | TGFB1I1   | Transforming growth factor beta-1-induced transcript 1 protein   |
| 1.044           | 1.008        | 1.056        | 0.999        | 0.920        | 1.052        | 1.025        | 1.045        | 1.054        | 1.015         | 1.004         | 1.044         | Q8WUH2       | TGFBRAP1  | Transforming growth factor-beta receptor-associated protein 1    |
| 1.039           | 1.051        | 0.994        | 0.925        | 0.915        | 0.967        | 1.040        | 0.969        | 0.990        | 0.748         | 0.806         | 0.808         | Q15582       | TGFB1     | Transforming growth factor-beta-induced protein ig-h3            |
| 0.945           | 0.980        | 0.964        | 1.065        | 1.020        | 0.954        | 1.055        | 0.978        | 0.951        | 1.015         | 1.103         | 0.930         | P61586       | RHOA      | Transforming protein RhoA                                        |
| 0.844           | 0.958        | 1.187        | 0.895        | 0.919        | 1.033        | 1.098        | 1.159        | 1.034        | 1.002         | 0.895         | 1.078         | Q01995       | TAGLN     | Transgelin                                                       |
| 0.872           | 0.815        | 0.963        | 1.014        | 0.972        | 1.163        | 0.945        | 1.076        | 1.008        | 1.063         | 0.971         | 1.080         | Q9UI15       | TAGLN3    | Transgelin-3                                                     |
| 0.863           | 0.933        | 0.983        | 0.844        | 0.899        | 0.949        | 0.917        | 0.795        | 0.971        | 0.997         | 0.938         | 1.072         | O43493       | TGOLN2    | Trans-Golgi network integral membrane protein 2                  |
| 1.009           | 1.025        | 1.011        | 1.015        | 1.018        | 0.955        | 1.049        | 1.215        | 0.986        | 1.086         | 1.142         | 1.094         | Q8TD43       | TRPM4     | Transient receptor potential cation channel subfamily M member 4 |
| 0.954           | 0.995        | 1.032        | 0.997        | 0.939        | 0.997        | 1.014        | 0.995        | 0.994        | 0.998         | 1.031         | 1.093         | Q9Y5S1       | TRPV2     | Transient receptor potential cation channel subfamily V member 2 |
| 0.997           | 1.018        | 0.993        | 1.002        | 1.124        | 0.997        | 1.019        | 1.009        | 1.054        | 0.993         | 1.014         | 1.009         | P55072       | VCP       | Transitional endoplasmic reticulum ATPase                        |
| 0.769           | 1.023        | 0.798        | 1.038        | 1.141        | 0.911        | 1.215        | 1.196        | 0.940        | 1.396         | 1.062         | 1.106         | A0A0B4J1R6   | TKT       | Transketolase                                                    |
| 0.966           | 0.963        | 1.028        | 0.946        | 0.934        | 1.035        | 0.950        | 1.137        | 1.041        | 0.962         | 1.017         | 1.093         | Q8N442       | GUF1      | Translation factor GUF1, mitochondrial                           |
| 1.034           | 0.983        | 0.985        | 1.002        | 0.995        | 1.029        | 1.014        | 0.996        | 1.010        | 0.992         | 0.962         | 0.978         | Q14232       | EIF2B1    | Translation initiation factor eIF-2B subunit alpha               |
| 1.039           | 0.973        | 1.039        | 0.969        | 0.942        | 1.029        | 0.948        | 0.954        | 1.017        | 0.976         | 0.969         | 1.048         | P49770       | EIF2B2    | Translation initiation factor eIF-2B subunit beta                |
| 1.038           | 1.016        | 1.011        | 0.973        | 0.993        | 1.013        | 0.984        | 0.976        | 0.988        | 1.047         | 1.000         | 1.032         | E7ERK9       | EIF2B4    | Translation initiation factor eIF-2B subunit delta               |
| 0.980           | 0.967        | 1.036        | 1.000        | 0.881        | 0.991        | 0.943        | 0.981        | 0.992        | 0.926         | 0.952         | 1.012         | Q13144       | EIF2B5    | Translation initiation factor eIF-2B subunit epsilon             |
| 0.993           | 1.020        | 0.990        | 1.002        | 1.026        | 0.993        | 1.017        | 1.051        | 1.011        | 1.015         | 1.010         | 1.005         | Q9NR50       | EIF2B3    | Translation initiation factor eIF-2B subunit gamma               |
| 0.992           | 0.975        | 1.010        | 0.967        | 1.007        | 0.984        | 0.975        | 0.882        | 1.013        | 0.998         | 0.997         | 1.007         | P46199       | MTIF2     | Translation initiation factor IF-2, mitochondrial                |
| 1.047           | 1.008        | 1.025        | 0.976        | 0.956        | 0.993        | 1.027        | 0.935        | 0.989        | 0.996         | 1.071         | 1.061         | Q9H2K0       | MTIF3     | Translation initiation factor IF-3, mitochondrial                |
| 1.033           | 0.997        | 1.003        | 1.012        | 0.984        | 1.023        | 1.062        | 1.084        | 0.999        | 1.001         | 1.035         | 0.987         | H0Y9X1       | TMA16     | Translation machinery-associated protein 16 (Fragment)           |
| 0.911           | 0.901        | 0.952        | 0.857        | 0.979        | 1.001        | 0.877        | 0.628        | 0.869        | 1.015         | 0.976         | 0.975         | Q9Y2S6       | TMA7      | Translation machinery-associated protein 7                       |
| 0.943           | 1.008        | 1.045        | 0.959        | 0.912        | 0.939        | 0.958        | 0.902        | 0.946        | 0.989         | 0.928         | 0.979         | Q9BSH4       | TACO1     | Translational activator of cytochrome c oxidase 1                |
| 0.985           | 1.011        | 0.990        | 1.021        | 0.994        | 1.016        | 0.951        | 0.993        | 1.003        | 0.943         | 1.023         | 0.942         | A0A0B4J2C3   | TPT1      | Translationally-controlled tumor protein                         |
| 1.016           | 0.973        | 0.995        | 0.987        | 0.941        | 1.028        | 1.013        | 1.012        | 1.049        | 1.042         | 1.027         | 0.971         | Q15631       | TSN       | Translin                                                         |
| 0.964           | 0.974        | 0.991        | 1.000        | 1.001        | 1.033        | 0.986        | 0.911        | 1.019        | 0.994         | 1.016         | 1.021         | Q99598       | TSNAX     | Translin-associated protein X                                    |
| 0.974           | 1.020        | 0.992        | 1.012        | 0.992        | 0.996        | 1.080        | 1.064        | 1.012        | 1.159         | 1.062         | 1.089         | Q15629       | TRAM1     | Translocating chain-associated membrane protein 1                |
| 0.964           | 1.015        | 1.037        | 0.963        | 0.925        | 1.000        | 0.971        | 0.912        | 0.978        | 1.064         | 1.043         | 1.069         | Q99442       | SEC62     | Translocation protein SEC62                                      |

| Abundance Ratio |              |              |              |              |              |              |              |              |               |               |               | Accession ID | Gene name | Protein Description                                               |
|-----------------|--------------|--------------|--------------|--------------|--------------|--------------|--------------|--------------|---------------|---------------|---------------|--------------|-----------|-------------------------------------------------------------------|
| 1 d<br>M1/C1    | 1 d<br>M2/C2 | 1 d<br>M3/C3 | 4 d<br>M1/C1 | 4 d<br>M2/C2 | 4 d<br>M3/C3 | 7 d<br>M1/C1 | 7 d<br>M2/C2 | 7 d<br>M3/C3 | 10 d<br>M1/C1 | 10 d<br>M2/C2 | 10 d<br>M3/C3 |              |           |                                                                   |
| 0.982           | 1.012        | 1.015        | 0.980        | 0.940        | 0.978        | 0.993        | 1.080        | 1.000        | 1.003         | 1.016         | 0.996         | Q9UGP8       | SEC63     | Translocation protein SEC63 homolog                               |
| 0.967           | 0.904        | 0.990        | 0.954        | 0.844        | 1.100        | 1.055        | 0.950        | 0.948        | 1.108         | 0.971         | 0.959         | P30536       | TSPO      | Translocator protein                                              |
| 0.965           | 0.991        | 0.990        | 0.981        | 0.982        | 1.037        | 1.022        | 1.090        | 0.982        | 0.998         | 1.018         | 0.973         | P43307       | SSR1      | Translocon-associated protein subunit alpha                       |
| 1.012           | 1.006        | 1.024        | 0.983        | 0.976        | 0.946        | 0.985        | 1.021        | 0.956        | 0.915         | 1.017         | 0.920         | P51571       | SSR4      | Translocon-associated protein subunit delta                       |
|                 |              |              |              |              |              |              |              |              | 1.029         | 0.941         | 0.997         | Q96CE8       | TM4SF18   | Transmembrane 4 L6 family member 18                               |
| 1.057           | 0.965        | 1.005        | 1.162        | 1.179        | 1.174        | 1.368        | 1.225        | 1.223        |               |               |               | Q9NS93       | TM7SF3    | Transmembrane 7 superfamily member 3                              |
| 0.955           | 0.993        | 0.994        | 0.958        | 0.887        | 0.989        | 1.028        | 1.005        | 1.001        | 1.055         | 1.040         | 1.037         | Q99805       | TM9SF2    | Transmembrane 9 superfamily member 2                              |
| 1.087           | 1.004        | 0.990        | 1.073        | 0.989        | 0.983        | 1.080        | 1.022        | 1.050        | 1.086         | 1.054         | 0.956         | Q9HD45       | TM9SF3    | Transmembrane 9 superfamily member 3                              |
| 0.933           | 1.000        | 0.987        | 0.966        | 0.918        | 1.018        | 1.011        | 1.001        | 1.016        | 1.018         | 1.028         | 1.014         | Q92544       | TM9SF4    | Transmembrane 9 superfamily member 4                              |
| 0.971           | 0.975        | 1.000        | 0.991        | 0.937        | 1.015        | 1.029        | 1.028        | 1.015        | 1.099         | 1.062         | 1.063         | E9PSI1       | 3 SV      | Transmembrane 9 superfamily member                                |
| 0.943           | 1.057        | 0.947        | 1.005        | 0.971        | 1.109        | 0.895        | 1.029        | 1.226        | 0.886         | 0.954         | 1.124         | Q6UWJ1       | TMCO3     | Transmembrane and coiled-coil domain-containing protein 3         |
|                 |              |              | 0.949        | 0.770        | 1.170        |              |              |              |               |               |               | Q5TGY1       | TMCO4     | Transmembrane and coiled-coil domain-containing protein 4         |
|                 |              |              | 1.112        | 0.869        | 1.042        |              |              |              |               |               |               | Q8N394       | TMTC2     | Transmembrane and TPR repeat-containing protein 2                 |
| 0.936           | 0.973        | 1.012        | 1.004        | 0.947        | 1.016        | 1.040        | 1.045        | 1.009        | 1.095         | 1.008         | 1.007         | Q6ZXV5       | TMTC3     | Transmembrane and TPR repeat-containing protein 3                 |
| 0.887           | 0.971        | 0.986        | 0.899        | 1.052        | 1.157        | 1.013        | 1.120        | 1.048        | 0.996         | 1.004         | 1.209         | Q9BVT8       | TMUB1     | Transmembrane and ubiquitin-like domain-containing protein 1      |
| 0.896           | 0.992        | 0.933        | 0.829        | 0.995        | 0.983        | 0.823        | 1.269        | 1.089        | 0.947         | 0.948         | 0.901         | Q71RG4       | TMUB2     | Transmembrane and ubiquitin-like domain-containing protein 2      |
|                 |              |              | 1.110        | 0.902        | 0.908        | 0.921        | 1.092        | 1.249        | 0.910         | 0.742         | 0.943         | Q6NXT6       | TAPT1     | Transmembrane anterior posterior transformation protein 1 homolog |
| 0.922           | 0.954        | 0.983        | 1.011        | 0.899        | 1.012        | 1.066        | 0.922        | 0.976        | 1.005         | 0.976         | 1.031         | Q13445       | TMED1     | Transmembrane emp24 domain-containing protein 1                   |
| 0.961           | 0.973        | 0.992        | 0.979        | 1.008        | 1.033        | 0.990        | 0.977        | 1.009        | 0.967         | 1.002         | 0.974         | P49755       | TMED10    | Transmembrane emp24 domain-containing protein 10                  |
| 0.884           | 0.983        | 0.962        | 0.979        | 0.934        | 1.053        | 1.022        | 0.980        | 0.971        | 1.062         | 1.043         | 1.045         | Q15363       | TMED2     | Transmembrane emp24 domain-containing protein 2                   |
|                 |              |              |              |              |              |              |              |              | 0.884         | 0.951         | 1.164         | Q9Y3Q3       | TMED3     | Transmembrane emp24 domain-containing protein 3                   |
| 0.983           | 0.970        | 0.999        | 1.027        | 0.973        | 1.026        | 1.018        | 1.101        | 1.029        | 1.024         | 1.012         | 1.005         | Q7Z7H5       | TMED4     | Transmembrane emp24 domain-containing protein 4                   |
| 0.893           | 0.971        | 0.965        | 0.984        | 0.908        | 1.033        | 1.045        | 1.057        | 1.004        | 1.009         | 0.978         | 1.020         | Q9Y3A6       | TMED5     | Transmembrane emp24 domain-containing protein 5                   |
| 0.960           | 1.005        | 1.017        | 0.988        | 0.964        | 0.994        | 0.961        | 0.952        | 0.990        | 0.981         | 0.983         | 0.960         | Q9BVK6       | TMED9     | Transmembrane emp24 domain-containing protein 9                   |

| Abundance Ratio |              |              |              |              |              |              |              |              |               |               |               | Accession ID | Gene name | Protein Description                     |
|-----------------|--------------|--------------|--------------|--------------|--------------|--------------|--------------|--------------|---------------|---------------|---------------|--------------|-----------|-----------------------------------------|
| 1 d<br>M1/C1    | 1 d<br>M2/C2 | 1 d<br>M3/C3 | 4 d<br>M1/C1 | 4 d<br>M2/C2 | 4 d<br>M3/C3 | 7 d<br>M1/C1 | 7 d<br>M2/C2 | 7 d<br>M3/C3 | 10 d<br>M1/C1 | 10 d<br>M2/C2 | 10 d<br>M3/C3 |              |           |                                         |
|                 |              |              | 1.161        | 1.188        | 0.924        | 1.040        | 1.034        | 1.136        | 1.140         | 1.047         | 0.985         | Q96IK0       | TMEM101   | Transmembrane protein 101               |
|                 |              |              | 0.934        | 0.824        | 1.116        | 0.958        | 1.030        | 0.997        |               |               |               | Q8N9M5       | TMEM102   | Transmembrane protein 102               |
| 1.032           | 1.023        | 0.943        | 1.092        | 1.009        | 1.006        | 1.136        | 1.015        | 1.002        | 1.170         | 1.188         | 1.064         | Q9NUM4       | TMEM106B  | Transmembrane protein 106B              |
| 0.915           | 0.963        | 0.978        | 0.944        | 0.907        | 1.002        | 1.003        | 0.944        | 0.986        | 1.117         | 1.002         | 1.075         | Q9BVC6       | TMEM109   | Transmembrane protein 109               |
| 1.038           | 0.953        | 1.014        | 1.016        | 1.026        | 0.969        | 1.024        | 0.826        | 1.025        | 1.074         | 1.043         | 1.012         | P17152       | TMEM11    | Transmembrane protein 11, mitochondrial |
| 0.983           | 0.938        | 1.003        | 0.959        | 0.915        | 0.951        | 1.005        | 0.884        | 0.893        | 0.995         | 0.964         | 1.043         | Q12893       | TMEM115   | Transmembrane protein 115               |
| 1.078           | 1.019        | 1.031        | 1.032        | 0.892        | 0.930        | 0.937        | 1.031        | 0.993        | 1.111         | 1.029         | 1.124         | A0A087X266   | TMEM120A  | Transmembrane protein 120A              |
|                 |              |              | 0.981        | 1.287        | 0.865        | 1.026        | 1.063        | 1.037        | 1.106         | 1.071         | 1.163         | A0PK00       | TMEM120B  | Transmembrane protein 120B              |
| 0.999           | 0.969        | 1.023        | 1.024        | 0.924        | 1.044        | 1.011        | 1.067        | 0.999        | 0.970         | 1.023         | 0.985         | Q9H061       | TMEM126A  | Transmembrane protein 126A              |
| 0.958           | 0.990        | 1.226        | 0.867        | 0.854        | 1.079        | 0.915        | 0.678        | 1.099        |               |               |               | Q92545       | TMEM131   | Transmembrane protein 131               |
| 0.934           | 1.066        | 0.894        | 0.962        | 0.857        | 1.066        | 1.039        | 1.181        | 0.983        | 1.046         | 1.077         | 1.068         | Q9H6X4       | TMEM134   | Transmembrane protein 134               |
| 0.970           | 1.060        | 0.981        | 1.015        | 0.953        | 1.004        | 0.960        | 1.131        | 1.050        | 1.052         | 1.084         | 1.087         | Q86UB9       | TMEM135   | Transmembrane protein 135               |
|                 |              |              |              |              |              |              |              |              | 1.108         | 1.058         | 1.100         | Q96I45       | TMEM141   | Transmembrane protein 141               |
| 0.858           | 1.229        | 0.908        |              |              |              | 1.361        | 1.008        | 1.137        | 1.402         | 0.897         | 1.105         | Q9BVK8       | TMEM147   | Transmembrane protein 147               |
| 1.116           | 0.991        | 1.028        | 1.116        | 0.981        | 0.950        | 0.919        | 1.060        | 1.013        | 0.944         | 0.980         | 0.922         | Q9P0S9       | TMEM14C   | Transmembrane protein 14C               |
| 1.439           | 0.894        | 1.271        | 0.932        | 0.923        | 1.090        | 0.994        | 1.019        | 1.044        |               |               |               | A8MWL7       | TMEM14DP  | Transmembrane protein 14DP              |
| 0.948           | 0.941        | 1.043        | 0.969        | 0.915        | 0.929        | 0.926        | 0.954        | 0.902        | 1.017         | 0.973         | 1.004         | Q9NX00       | TMEM160   | Transmembrane protein 160               |
|                 |              |              | 0.934        | 0.890        | 0.950        | 0.946        | 1.068        | 1.023        |               |               |               | Q9NX61       | TMEM161A  | Transmembrane protein 161A              |
| 1.035           | 0.983        | 1.009        | 0.989        | 0.921        | 1.004        | 1.065        | 1.074        | 1.011        | 1.082         | 1.046         | 1.110         | Q9HC07       | TMEM165   | Transmembrane protein 165               |
| 0.896           | 1.119        | 1.018        | 1.005        | 1.033        | 0.959        | 1.020        | 1.197        | 1.059        | 0.925         | 1.062         | 0.884         | Q9H0V1       | TMEM168   | Transmembrane protein 168               |
| 1.046           | 1.105        | 1.050        | 1.020        | 0.975        | 0.975        | 1.016        | 1.054        | 0.974        | 1.063         | 1.140         | 1.037         | Q53S58       | TMEM177   | Transmembrane protein 177               |
| 1.014           | 0.967        | 1.074        | 1.003        | 1.008        | 1.118        | 1.121        | 0.886        | 1.091        | 1.290         | 1.103         | 1.133         | Q7Z7N9       | TMEM179B  | Transmembrane protein 179B              |
| 1.002           | 1.061        | 1.036        | 1.103        | 1.042        | 1.058        | 1.097        | 1.116        | 1.070        | 1.068         | 1.107         | 1.102         | Q9P2C4       | TMEM181   | Transmembrane protein 181               |
| 1.010           | 0.931        | 1.062        | 0.960        | 0.894        | 1.025        | 0.938        | 0.810        | 1.040        | 1.126         | 1.221         | 1.273         | Q9Y519       | TMEM184B  | Transmembrane protein 184B              |
| 1.025           | 0.924        | 1.096        | 0.887        | 0.898        | 1.016        | 1.010        | 0.980        | 1.089        | 1.076         | 1.063         | 1.117         | Q9NVA4       | TMEM184C  | Transmembrane protein 184C              |
|                 |              |              |              |              |              | 1.118        | 1.080        | 0.997        |               |               |               | Q8NFB2       | TMEM185A  | Transmembrane protein 185A              |
| 1.159           | 1.078        | 1.069        | 0.917        | 0.804        | 1.066        | 0.960        | 1.074        | 1.005        | 1.028         | 0.926         | 0.985         | Q96B77       | TMEM186   | Transmembrane protein 186               |
| 0.973           | 0.942        | 0.932        | 0.991        | 0.901        | 0.922        | 1.051        | 0.976        | 0.997        | 1.054         | 1.020         | 1.044         | Q96HH6       | TMEM19    | Transmembrane protein 19                |
| 0.975           | 0.992        | 1.023        | 0.946        | 0.879        | 1.038        | 1.046        | 1.077        | 1.045        | 1.048         | 1.022         | 0.984         | Q8IY95       | TMEM192   | Transmembrane protein 192               |
| 1.158           | 0.841        | 0.909        | 1.020        | 0.932        | 1.063        | 1.062        | 0.839        | 1.112        | 1.051         | 1.046         | 1.116         | Q8N511       | TMEM199   | Transmembrane protein 199               |
| 1.349           | 1.155        | 1.075        | 1.106        | 1.134        | 0.834        | 1.189        | 0.996        | 0.951        |               |               |               | Q9UHN6       | TMEM2     | Transmembrane protein 2                 |
| 0.954           | 1.031        | 1.038        | 0.951        | 0.881        | 0.993        | 1.031        | 1.118        | 1.022        | 1.013         | 1.009         | 0.977         | Q5SNT2       | TMEM201   | Transmembrane protein 201               |
| 0.977           | 1.031        | 0.942        | 0.973        | 0.940        | 1.028        | 1.031        | 1.157        | 1.020        | 1.098         | 1.078         | 1.029         | Q6UW68       | TMEM205   | Transmembrane protein 205               |
|                 |              |              |              |              |              | 1.201        | 1.006        | 0.941        |               |               |               | Q9BTX3       | TMEM208   | Transmembrane protein 208               |

| Abundance Ratio |              |              |              |              |              |              |              |              |               |               |               | Accession ID | Gene name | Protein Description                          |
|-----------------|--------------|--------------|--------------|--------------|--------------|--------------|--------------|--------------|---------------|---------------|---------------|--------------|-----------|----------------------------------------------|
| 1 d<br>M1/C1    | 1 d<br>M2/C2 | 1 d<br>M3/C3 | 4 d<br>M1/C1 | 4 d<br>M2/C2 | 4 d<br>M3/C3 | 7 d<br>M1/C1 | 7 d<br>M2/C2 | 7 d<br>M3/C3 | 10 d<br>M1/C1 | 10 d<br>M2/C2 | 10 d<br>M3/C3 |              |           |                                              |
| 0.947           | 1.002        | 0.943        | 1.118        | 0.988        | 0.984        | 1.068        | 1.072        | 1.014        | 1.123         | 1.133         | 1.076         | Q96SK2       | TMEM209   | Transmembrane protein 209                    |
| 0.965           | 1.016        | 1.000        | 0.994        | 0.906        | 0.975        | 1.031        | 1.148        | 1.014        | 1.038         | 1.023         | 1.037         | Q6NUQ4       | TMEM214   | Transmembrane protein 214                    |
| 1.110           | 1.004        | 1.099        | 0.979        | 0.785        | 1.033        | 0.942        | 1.125        | 1.050        | 1.067         | 1.144         | 0.955         | Q9H0R3       | TMEM222   | Transmembrane protein 222                    |
| 0.974           | 0.861        | 0.985        | 0.999        | 0.931        | 1.029        | 1.071        | 1.047        | 1.121        | 1.094         | 0.911         | 1.033         | A0PJW6       | TMEM223   | Transmembrane protein 223                    |
|                 |              |              | 0.862        | 0.744        | 1.288        |              |              |              |               |               |               | C9JI98       | TMEM238   | Transmembrane protein 238                    |
|                 |              |              |              |              |              | 0.934        | 0.911        | 0.778        | 0.988         | 1.019         | 1.044         | C9JY04       | TMEM243   | Transmembrane protein 243                    |
| 0.836           | 0.853        | 1.115        |              |              |              |              |              |              |               |               |               | Q9BRR3       | TMEM246   | Transmembrane protein 246                    |
|                 |              |              | 0.909        | 0.999        | 0.931        | 0.829        | 1.086        | 1.028        |               |               |               | Q8N2U0       | TMEM256   | Transmembrane protein 256                    |
|                 |              |              | 1.035        | 0.875        | 1.176        |              |              |              |               |               |               | P61165       | TMEM258   | Transmembrane protein 258                    |
|                 |              |              | 1.024        | 0.703        | 1.059        |              |              |              |               |               |               | Q9NX78       | TMEM260   | Transmembrane protein 260                    |
| 1.010           | 0.995        | 0.976        | 0.968        | 0.932        | 0.939        | 0.926        | 1.104        | 0.974        | 0.927         | 0.964         | 0.938         | Q8WUH6       | TMEM263   | Transmembrane protein 263                    |
| 0.952           | 0.927        | 0.823        | 0.786        | 0.987        | 1.171        | 1.279        | 1.108        | 1.222        | 1.175         | 0.981         | 1.050         | Q0VDI3       | TMEM267   | Transmembrane protein 267                    |
| 0.913           | 0.959        | 0.940        | 0.933        | 0.884        | 1.034        | 0.991        | 1.068        | 0.995        | 1.069         | 1.030         | 0.965         | P57088       | TMEM33    | Transmembrane protein 33                     |
| 0.952           | 0.786        | 1.012        | 0.728        | 0.697        | 1.324        | 1.067        | 0.820        | 1.051        | 0.944         | 0.920         | 1.198         | Q8NCS4       | TMEM35B   | Transmembrane protein 35B                    |
| 1.002           | 0.897        | 0.945        | 1.029        | 0.973        | 0.964        | 1.090        | 1.088        | 1.033        | 1.027         | 1.023         | 1.125         | Q8WWA1       | TMEM40    | Transmembrane protein 40                     |
| 0.894           | 0.976        | 1.058        | 0.870        | 0.859        | 1.161        | 1.022        | 0.899        | 1.086        | 1.099         | 0.943         | 1.168         | Q96HV5       | TMEM41A   | Transmembrane protein 41A                    |
| 1.094           | 0.844        | 1.115        |              |              |              | 1.177        | 1.155        | 1.008        |               |               |               | Q5BJD5       | TMEM41B   | Transmembrane protein 41B                    |
| 0.973           | 0.986        | 1.015        | 0.974        | 0.897        | 0.984        | 0.998        | 1.031        | 0.988        | 1.029         | 1.016         | 0.977         | Q9BTV4       | TMEM43    | Transmembrane protein 43                     |
| 0.713           | 1.051        | 1.028        | 1.074        | 0.913        | 0.992        |              |              |              |               |               |               | Q9BQJ4       | TMEM47    | Transmembrane protein 47                     |
|                 |              |              | 0.837        | 1.035        | 0.940        | 0.885        | 0.865        | 0.963        | 0.965         | 1.017         | 0.989         | Q9Y2B1       | TMEM5     | Transmembrane protein 5                      |
|                 |              |              |              |              |              |              |              |              | 1.245         | 1.047         | 1.046         | O95807       | TMEM50A   | Transmembrane protein 50A                    |
|                 |              |              |              |              |              |              |              |              | 0.904         | 0.935         | 1.443         | Q9BXS4       | TMEM59    | Transmembrane protein 59                     |
| 1.006           | 1.033        | 0.934        | 1.078        | 0.926        | 1.056        | 1.003        | 1.200        | 1.327        | 1.056         | 1.008         | 1.013         | Q0P6H9       | TMEM62    | Transmembrane protein 62                     |
| 0.926           | 0.967        | 1.005        | 0.987        | 0.928        | 1.091        | 1.050        | 1.008        | 1.021        | 1.208         | 0.991         | 1.099         | Q6PI78       | TMEM65    | Transmembrane protein 65                     |
|                 |              |              |              |              |              | 1.030        | 1.057        | 0.861        | 0.960         | 1.064         | 1.012         | Q96MH6       | TMEM68    | Transmembrane protein 68                     |
| 1.035           | 0.991        | 1.011        | 1.038        | 1.112        | 0.981        | 1.060        | 1.074        | 0.992        | 1.000         | 0.993         | 0.968         | Q9BUB7       | TMEM70    | Transmembrane protein 70, mitochondrial      |
| 1.002           | 0.995        | 1.004        | 0.995        | 0.928        | 1.027        | 0.984        | 1.079        | 1.067        | 1.007         | 0.995         | 1.029         | Q8NBN3       | TMEM87A   | Transmembrane protein 87A                    |
| 0.991           | 1.053        | 1.036        | 0.907        | 0.829        | 0.976        | 0.898        | 0.894        | 0.941        | 1.015         | 0.932         | 0.997         | Q96K49       | TMEM87B   | Transmembrane protein 87B                    |
| 1.025           | 1.031        | 0.964        | 1.112        | 0.996        | 0.934        | 1.066        | 1.319        | 1.003        | 1.183         | 1.121         | 1.184         | Q9HCN3       | TMEM8A    | Transmembrane protein 8A                     |
| 0.964           | 0.946        | 0.996        | 0.990        | 0.984        | 1.085        | 0.943        | 0.681        | 0.988        | 1.079         | 1.061         | 1.098         | B1ALM5       | TMEM9     | Transmembrane protein 9                      |
| 0.946           | 0.962        | 0.735        | 0.950        | 0.958        | 1.019        | 1.160        | 0.973        | 1.069        | 1.278         | 1.100         | 1.172         | Q5BJF2       | TMEM97    | Transmembrane protein 97                     |
| 0.985           | 1.149        | 1.185        | 1.028        | 1.040        | 1.138        | 1.150        | 0.914        | 1.096        | 1.193         | 1.131         | 1.257         | Q9NQ34       | TMEM9B    | Transmembrane protein 9B                     |
|                 |              |              |              |              |              |              |              |              | 1.203         | 0.909         | 1.145         | Q86W33       | TPRA1     | Transmembrane protein adipocyte-associated 1 |

| Abundance Ratio |              |              |              |              |              |              |              |              |               |               |               | Accession ID | Gene name | Protein Description                                   |
|-----------------|--------------|--------------|--------------|--------------|--------------|--------------|--------------|--------------|---------------|---------------|---------------|--------------|-----------|-------------------------------------------------------|
| 1 d<br>M1/C1    | 1 d<br>M2/C2 | 1 d<br>M3/C3 | 4 d<br>M1/C1 | 4 d<br>M2/C2 | 4 d<br>M3/C3 | 7 d<br>M1/C1 | 7 d<br>M2/C2 | 7 d<br>M3/C3 | 10 d<br>M1/C1 | 10 d<br>M2/C2 | 10 d<br>M3/C3 |              |           |                                                       |
| 1.018           | 1.033        | 1.063        | 0.988        | 1.057        | 0.975        | 1.025        | 1.058        | 0.989        | 0.935         | 1.062         | 1.099         | Q9C0B7       | TANGO6    | Transport and Golgi organization protein 6 homolog    |
| 0.989           | 1.002        | 1.012        | 0.993        | 1.020        | 1.008        | 1.003        | 1.045        | 1.030        | 0.947         | 1.008         | 0.987         | Q92973       | TNPO1     | Transportin-1                                         |
| 0.994           | 1.002        | 1.016        | 0.989        | 1.016        | 1.053        | 1.050        | 1.042        | 1.062        | 1.014         | 0.979         | 1.037         | Q9Y5L0       | TNPO3     | Transportin-3                                         |
| 0.891           | 1.260        | 0.874        | 0.999        | 0.877        | 1.082        | 1.113        | 1.215        | 1.028        | 1.424         | 1.020         | 1.200         | HOYA99       | TCOF1     | Treacle protein (Fragment)                            |
| 1.042           | 1.098        | 1.009        |              |              |              |              |              |              |               |               |               | E7ETY2       | TCOF1     | Treacle protein                                       |
|                 |              |              |              |              |              | 1.044        | 1.032        | 1.087        | 0.841         | 0.983         | 1.146         | J3KR25       | TRIB3     | Tribbles homolog 3                                    |
| 0.964           | 0.991        | 0.997        | 1.007        | 1.120        | 1.002        | 1.014        | 0.948        | 1.000        | 1.047         | 1.046         | 1.031         | P53007       | SLC25A1   | Tricarboxylate transport protein, mitochondrial       |
| 0.908           | 1.029        | 1.046        | 0.932        | 0.822        | 0.985        | 1.048        | 0.973        | 1.068        | 1.005         | 0.853         | 1.051         | Q9BT92       | TCHP      | Trichoplein keratin filament-binding protein          |
| 0.976           | 1.004        | 0.985        | 0.996        | 1.009        | 1.008        | 1.004        | 0.990        | 0.995        | 1.003         | 0.993         | 0.988         | P40939       | HADHA     | Trifunctional enzyme subunit alpha, mitochondrial     |
| 0.995           | 0.987        | 0.976        | 0.990        | 0.974        | 0.998        | 0.985        | 1.004        | 0.979        | 0.974         | 0.962         | 0.954         | P55084       | HADHB     | Trifunctional enzyme subunit beta, mitochondrial      |
| 1.005           | 0.985        | 1.023        | 0.988        | 1.052        | 1.003        | 0.972        | 0.966        | 1.042        | 0.948         | 1.008         | 0.995         | P22102       | GART      | Trifunctional purine biosynthetic protein adenosine-3 |
| 0.892           | 0.974        | 0.881        | 1.095        | 1.048        | 1.094        | 1.046        | 1.169        | 1.015        | 1.021         | 1.155         | 0.978         | Q9NVV0       | TMEM38B   | Trimeric intracellular cation channel type B          |
| 1.027           | 0.918        | 0.879        | 1.044        | 0.869        | 0.970        | 1.001        | 1.110        | 0.972        | 1.187         | 0.894         | 0.959         | Q96RS0       | TGS1      | Trimethylguanosine synthase                           |
|                 |              |              |              |              |              |              |              |              | 1.078         | 0.925         | 1.027         | H9KVB4       | TNRC18    | Trinucleotide repeat-containing gene 18 protein       |
| 1.019           | 1.064        | 1.015        | 1.013        | 0.936        | 1.027        | 1.020        | 1.062        | 1.023        | 1.000         | 0.984         | 1.103         | Q8NDV7       | TNRC6A    | Trinucleotide repeat-containing gene 6A protein       |
| 0.987           | 1.047        | 1.026        | 0.987        | 1.011        | 1.030        | 1.003        | 0.867        | 1.026        | 1.094         | 1.054         | 1.118         | Q9UPQ9       | TNRC6B    | Trinucleotide repeat-containing gene 6B protein       |
| 1.198           | 1.026        | 0.940        | 0.843        | 0.876        | 0.890        | 1.058        | 1.165        | 0.826        | 1.268         | 1.028         | 1.026         | A0A1B0GU24   | TNRC6C    | Trinucleotide repeat-containing gene 6C protein       |
| 1.025           | 0.995        | 1.014        | 0.997        | 0.962        | 0.989        | 0.995        | 1.003        | 0.980        | 1.044         | 1.014         | 1.010         | Q9H2D6       | TRIOBP    | TRIO and F-actin-binding protein                      |
| 0.983           | 0.995        | 1.025        | 0.979        | 0.976        | 1.016        | 0.986        | 1.011        | 1.022        | 1.031         | 1.014         | 1.026         | Q3LXA3       | TKFC      | Triokinase/FMN cyclase                                |
| 1.143           | 0.986        | 1.004        | 1.042        | 1.180        | 0.955        | 0.996        | 0.954        | 1.026        | 0.967         | 0.980         | 0.934         | P60174       | TPI1      | Triosephosphate isomerase                             |
| 1.034           | 0.947        | 1.012        | 0.912        | 0.904        | 1.069        | 1.030        | 1.154        | 1.098        | 0.941         | 0.722         | 0.888         | Q14142       | TRIM14    | Tripartite motif-containing protein 14                |
| 1.043           | 1.062        | 1.120        | 0.939        | 1.034        | 1.110        | 1.118        | 1.010        | 0.895        |               |               |               | O95361       | TRIM16    | Tripartite motif-containing protein 16                |
| 1.026           | 0.944        | 1.028        | 0.999        | 0.860        | 0.948        | 0.963        | 1.028        | 1.022        | 1.023         | 0.951         | 1.115         | Q12899       | TRIM26    | Tripartite motif-containing protein 26                |
| 0.985           | 0.994        | 0.973        | 0.958        | 0.931        | 0.990        | 1.045        | 1.083        | 0.967        | 0.998         | 1.017         | 1.043         | O75382       | TRIM3     | Tripartite motif-containing protein 3                 |
|                 |              |              | 1.006        | 1.069        | 0.906        |              |              |              |               |               |               | Q96DX7       | TRIM44    | Tripartite motif-containing protein 44                |
| 1.023           | 1.003        | 1.011        | 1.026        | 0.951        | 1.027        | 1.011        | 0.952        | 1.014        | 1.059         | 0.970         | 1.084         | Q96LD4       | TRIM47    | Tripartite motif-containing protein 47                |
| 1.056           | 1.065        | 1.021        | 1.070        | 0.959        | 1.056        | 1.166        | 0.871        | 1.018        | 1.203         | 1.105         | 1.063         | Q9C035       | TRIM5     | Tripartite motif-containing protein 5                 |
| 0.985           | 1.012        | 1.050        | 0.991        | 0.997        | 1.050        | 0.926        | 0.902        | 1.025        | 1.105         | 1.018         | 1.099         | Q6PJ69       | TRIM65    | Tripartite motif-containing protein 65                |
| 1.018           | 0.996        | 1.023        | 0.960        | 0.990        | 0.986        | 0.939        | 0.929        | 0.969        | 0.983         | 1.032         | 0.978         | O14773       | TPP1      | Tripeptidyl-peptidase 1                               |
| 1.033           | 1.014        | 1.004        | 1.014        | 0.983        | 0.983        | 1.010        | 1.068        | 0.999        | 1.023         | 0.996         | 1.001         | P29144       | TPP2      | Tripeptidyl-peptidase 2                               |
| 0.962           | 0.989        | 1.004        | 0.959        | 0.959        | 0.997        | 1.012        | 0.969        | 1.002        | 0.987         | 0.976         | 1.044         | O75962       | TRIO      | Triple functional domain protein                      |
|                 |              |              |              |              |              |              |              |              | 0.988         | 1.122         | 0.970         | Q629K1       | TRIQK     | Triple QxxK/R motif-containing protein                |



| Abundance Ratio |              |              |              |              |              |              |              |              |               |               |               | Accession ID | Gene name | Protein Description                                                  |
|-----------------|--------------|--------------|--------------|--------------|--------------|--------------|--------------|--------------|---------------|---------------|---------------|--------------|-----------|----------------------------------------------------------------------|
| 1 d<br>M1/C1    | 1 d<br>M2/C2 | 1 d<br>M3/C3 | 4 d<br>M1/C1 | 4 d<br>M2/C2 | 4 d<br>M3/C3 | 7 d<br>M1/C1 | 7 d<br>M2/C2 | 7 d<br>M3/C3 | 10 d<br>M1/C1 | 10 d<br>M2/C2 | 10 d<br>M3/C3 |              |           |                                                                      |
| 1.048           | 1.031        | 0.994        | 1.041        | 1.004        | 1.002        | 1.019        | 1.050        | 0.977        | 1.023         | 1.025         | 1.008         | Q7Z2T5       | TRMT1L    | TRMT1-like protein                                                   |
| 1.073           | 1.004        | 1.034        | 1.006        | 0.981        | 1.007        | 0.998        | 0.980        | 1.021        | 1.038         | 1.065         | 0.994         | Q96FX7       | TRMT61A   | tRNA (adenine(58)-N(1))-methyltransferase catalytic subunit TRMT61A  |
| 0.993           | 1.007        | 1.024        | 1.017        | 0.942        | 1.015        | 0.988        | 1.032        | 1.005        | 1.020         | 1.071         | 1.034         | Q9UJA5       | TRMT6     | tRNA (adenine(58)-N(1))-methyltransferase non-catalytic subunit TRM6 |
| 1.064           | 1.015        | 1.105        | 0.972        | 0.945        | 1.009        | 1.051        | 0.984        | 1.114        | 1.039         | 1.051         | 1.056         | Q9BVS5       | TRMT61B   | tRNA (adenine(58)-N(1))-methyltransferase, mitochondrial             |
| 0.998           | 1.003        | 0.989        | 0.996        | 1.003        | 0.967        | 1.011        | 1.030        | 0.992        | 0.987         | 0.997         | 1.010         | Q08J23       | NSUN2     | tRNA (cytosine(34)-C(5))-methyltransferase                           |
| 0.852           | 0.978        | 1.081        |              |              |              |              |              |              | 0.857         | 0.979         | 1.417         | Q9H649       | NSUN3     | tRNA (cytosine(34)-C(5))-methyltransferase, mitochondrial            |
| 0.993           | 0.978        | 1.008        | 1.027        | 0.958        | 1.062        | 0.995        | 1.127        | 1.009        | 1.003         | 1.039         | 1.006         | Q7Z4G4       | TRMT11    | tRNA (guanine(10)-N2)-methyltransferase homolog                      |
| 0.942           | 0.985        | 1.006        | 0.948        | 0.982        | 1.057        | 1.022        | 0.956        | 0.999        | 1.034         | 0.993         | 1.109         | Q9NXH9       | TRMT1     | tRNA (guanine(26)-N(2))-dimethyltransferase                          |
| 1.069           | 0.986        | 1.004        | 1.055        | 0.964        | 1.030        | 1.066        | 1.062        | 1.016        | 1.048         | 1.000         | 1.041         | Q32P41       | TRMT5     | tRNA (guanine(37)-N1)-methyltransferase                              |
| 1.019           | 0.987        | 1.037        | 0.995        | 0.972        | 0.996        | 1.024        | 1.057        | 1.027        | 1.033         | 0.992         | 1.022         | P57081       | WDR4      | tRNA (guanine-N(7)-)-methyltransferase non-catalytic subunit WDR4    |
| 1.102           | 1.047        | 1.026        | 1.040        | 1.018        | 1.029        | 0.965        | 1.065        | 1.001        | 1.032         | 1.147         | 1.052         | Q9UBP6       | METTL1    | tRNA (guanine-N(7)-)-methyltransferase                               |
|                 |              |              | 0.845        | 0.929        | 0.792        |              |              |              |               |               |               | Q96GJ1       | TRMT2B    | tRNA (uracil(54)-C(5))-methyltransferase homolog                     |
| 0.975           | 0.992        | 1.054        | 0.991        | 0.981        | 1.042        | 1.021        | 1.141        | 1.038        | 1.033         | 1.037         | 1.041         | F2Z2W7       | TRMT2A    | tRNA (uracil-5-)-methyltransferase homolog A                         |
| 1.040           | 1.023        | 1.084        | 0.956        | 0.932        | 1.065        | 0.942        | 0.948        | 1.040        | 1.053         | 1.014         | 1.086         | Q86TN4       | TRPT1     | tRNA 2'-phosphotransferase 1                                         |
| 1.049           | 0.984        | 1.012        | 0.980        | 0.969        | 1.007        | 0.935        | 0.913        | 1.006        | 0.998         | 0.985         | 1.030         | Q9H3H1       | TRIT1     | tRNA dimethylallyltransferase, mitochondrial                         |
| 1.017           | 0.990        | 1.031        | 0.984        | 0.976        | 1.035        | 1.000        | 0.966        | 1.005        | 1.021         | 0.979         | 1.016         | Q9Y606       | PUS1      | tRNA pseudouridine synthase A, mitochondrial                         |
| 1.031           | 1.065        | 1.026        | 1.023        | 0.929        | 0.982        | 1.040        | 1.076        | 1.074        | 0.976         | 0.904         | 1.102         | Q8N0Z8       | PUSL1     | tRNA pseudouridine synthase-like 1                                   |
| 1.000           | 0.967        | 0.930        |              |              |              |              |              |              |               |               |               | Q9BZE2       | PUS3      | tRNA pseudouridine(38/39) synthase                                   |
| 1.091           | 1.018        | 1.031        | 1.060        | 0.984        | 1.022        | 1.019        | 1.019        | 0.940        | 0.966         | 0.963         | 1.025         | Q9NX07       | TRNAU1AP  | tRNA selenocysteine 1-associated protein 1                           |
| 0.953           | 0.971        | 1.031        | 0.963        | 0.937        | 1.035        | 1.106        | 1.023        | 0.965        | 1.008         | 0.911         | 0.974         | Q6IPR3       | TYW3      | tRNA wybutosine-synthesizing protein 3 homolog                       |
|                 |              |              | 1.016        | 1.044        | 0.992        |              |              |              |               |               |               | A2RUC4       | TYW5      | tRNA wybutosine-synthesizing protein 5                               |
| 1.104           | 0.940        | 0.956        | 0.974        | 0.929        | 0.994        | 1.100        | 1.064        | 1.275        | 1.229         | 1.085         | 1.128         | Q9NUP7       | TRMT13    | tRNA:m(4)X modification enzyme TRM13 homolog                         |
| 0.982           | 0.975        | 1.031        | 1.092        | 0.967        | 1.056        | 1.043        | 1.112        | 1.079        | 1.026         | 1.096         | 1.070         | Q6P1R4       | DUS1L     | tRNA-dihydrouridine(16/17) synthase [NAD(P)(+)]-like                 |
| 1.014           | 1.005        | 1.048        | 0.994        | 0.953        | 1.027        | 1.011        | 0.978        | 1.031        | 1.001         | 1.006         | 1.098         | Q9NX74       | DUS2      | tRNA-dihydrouridine(20) synthase [NAD(P)+]-like                      |
| 1.043           | 1.030        | 1.002        | 1.009        | 0.969        | 1.035        | 1.062        | 1.076        | 0.968        | 1.001         | 1.027         | 1.022         | Q96G46       | DUS3L     | tRNA-dihydrouridine(47) synthase [NAD(P)(+)]-like                    |
| 1.027           | 1.036        | 0.944        | 1.030        | 0.835        | 1.052        | 0.952        | 0.916        | 1.098        |               |               |               | Q9BUB4       | ADAT1     | tRNA-specific adenosine deaminase 1                                  |
| 0.936           | 0.959        | 1.061        | 0.841        | 1.040        | 1.072        | 0.845        | 0.755        | 0.958        | 1.034         | 1.015         | 1.065         | Q7Z6V5       | ADAT2     | tRNA-specific adenosine deaminase 2                                  |
| 0.820           | 0.780        | 0.833        | 0.910        | 1.126        | 0.961        | 1.068        | 0.889        | 1.052        | 0.963         | 1.029         | 1.200         | Q8WW01       | TSEN15    | tRNA-splicing endonuclease subunit Sen15                             |
| 1.212           | 1.043        | 0.959        | 1.003        | 0.938        | 0.959        | 0.911        | 1.122        | 1.072        | 0.999         | 1.008         | 1.027         | Q8NCE0       | TSEN2     | tRNA-splicing endonuclease subunit Sen2                              |

| Abundance Ratio |              |              |              |              |              |              |              |              |               |               |               | Accession ID | Gene name | Protein Description                      |
|-----------------|--------------|--------------|--------------|--------------|--------------|--------------|--------------|--------------|---------------|---------------|---------------|--------------|-----------|------------------------------------------|
| 1 d<br>M1/C1    | 1 d<br>M2/C2 | 1 d<br>M3/C3 | 4 d<br>M1/C1 | 4 d<br>M2/C2 | 4 d<br>M3/C3 | 7 d<br>M1/C1 | 7 d<br>M2/C2 | 7 d<br>M3/C3 | 10 d<br>M1/C1 | 10 d<br>M2/C2 | 10 d<br>M3/C3 |              |           |                                          |
| 1.062           | 1.029        | 1.016        | 1.003        | 0.919        | 1.036        | 1.056        | 1.075        | 1.034        | 1.024         | 0.965         | 1.044         | Q9BSV6       | TSEN34    | tRNA-splicing endonuclease subunit Sen34 |
| 0.961           | 0.970        | 0.958        | 1.014        | 0.919        | 1.046        | 0.902        | 1.046        | 1.009        | 0.963         | 1.068         | 1.048         | Q726J9       | TSEN54    | tRNA-splicing endonuclease subunit Sen54 |
| 0.940           | 1.003        | 0.965        | 0.996        | 0.981        | 0.983        | 0.982        | 1.027        | 0.997        | 0.986         | 1.017         | 0.985         | Q9Y3I0       | RTCB      | tRNA-splicing ligase RtcB homolog        |
| 1.005           | 1.018        | 1.023        | 1.034        | 0.882        | 1.024        | 0.979        | 1.011        | 1.018        | 1.017         | 0.982         | 1.062         | Q13641       | TPBG      | Trophoblast glycoprotein                 |
| 0.980           | 0.967        | 1.002        | 1.058        | 0.918        | 0.983        | 0.915        | 0.982        | 1.021        | 1.024         | 0.922         | 1.088         | P28289       | TMOD1     | Tropomodulin-1                           |
| 1.034           | 0.958        | 0.835        | 0.851        | 0.953        | 1.136        | 1.115        | 0.957        | 1.063        | 1.009         | 0.955         | 1.036         | Q9NZR1       | TMOD2     | Tropomodulin-2                           |
| 1.008           | 1.006        | 0.993        | 0.978        | 0.968        | 1.004        | 0.968        | 0.932        | 0.981        | 0.958         | 0.995         | 0.998         | Q9NYL9       | TMOD3     | Tropomodulin-3                           |
| 1.007           | 1.009        | 1.024        | 0.984        | 0.953        | 0.997        | 1.001        | 0.940        | 0.999        | 0.960         | 0.965         | 0.973         | Q6ZN40       | TPM1      | Tropomyosin 1 (Alpha), isoform CRA_f     |
| 1.037           | 0.979        | 1.029        | 1.007        | 0.953        | 0.989        | 0.944        | 0.875        | 1.005        | 1.013         | 1.013         | 1.010         | H0YK48       | TPM1      | Tropomyosin alpha-1 chain                |
| 1.033           | 0.976        | 1.025        | 0.964        | 0.995        | 1.000        | 1.023        | 0.838        | 0.954        | 1.012         | 1.007         | 1.019         | J3KN67       | TPM3      | Tropomyosin alpha-3 chain                |
| 1.009           | 1.005        | 1.026        | 0.982        | 0.936        | 0.957        | 0.944        | 0.920        | 0.971        | 0.943         | 0.981         | 0.980         | P67936       | TPM4      | Tropomyosin alpha-4 chain                |
| 0.992           | 0.992        | 0.993        | 0.964        | 0.973        | 0.987        | 0.958        | 0.962        | 0.981        | 0.928         | 0.978         | 0.917         | Q5TCU3       | TPM2      | Tropomyosin beta chain                   |
| 0.992           | 1.014        | 1.014        | 1.012        | 0.919        | 0.991        | 0.988        | 1.090        | 1.002        | 0.968         | 0.985         | 1.021         | Q9Y4C2       | TCAF1     | TRPM8 channel-associated factor 1        |
| 0.989           | 1.010        | 1.001        | 1.029        | 1.072        | 1.020        | 1.007        | 0.982        | 1.033        | 0.985         | 0.976         | 0.985         | P23381       | WARS      | Tryptophan--tRNA ligase, cytoplasmic     |
| 1.006           | 1.010        | 1.046        | 0.968        | 0.965        | 1.027        | 0.986        | 1.015        | 0.999        | 1.006         | 1.021         | 1.036         | Q9UGM6       | WARS2     | Tryptophan--tRNA ligase, mitochondrial   |
| 0.856           | 1.022        | 1.015        | 0.906        | 1.079        | 0.975        | 0.904        | 0.956        | 0.990        | 0.922         | 0.927         | 1.072         | Q15714       | TSC22D1   | TSC22 domain family protein 1            |
| 1.010           | 1.201        | 0.741        | 1.022        | 0.865        | 0.971        | 0.991        | 0.967        | 1.000        | 1.221         | 0.837         | 1.000         | O75157       | TSC22D2   | TSC22 domain family protein 2            |
| 0.998           | 1.012        | 0.993        | 0.961        | 0.953        | 0.975        | 0.987        | 1.031        | 1.014        | 1.043         | 0.965         | 1.037         | Q9Y3Q8       | TSC22D4   | TSC22 domain family protein 4            |
| 1.081           | 1.109        | 1.077        | 1.054        | 0.836        | 1.057        | 1.051        | 1.014        | 1.035        | 1.056         | 0.911         | 1.087         | Q8WUA8       | TSKU      | Tsukushin                                |
| 0.996           | 1.013        | 1.042        | 1.003        | 0.996        | 1.015        | 1.044        | 1.064        | 1.052        | 1.005         | 1.027         | 1.026         | P49815       | TSC2      | Tuberin                                  |
| 1.048           | 0.915        | 1.189        |              |              |              | 0.968        | 0.736        | 1.453        | 0.939         | 0.881         | 1.159         | F8VQQ4       | TUBA1A    | Tubulin alpha chain (Fragment)           |
| 0.946           | 0.911        | 0.957        | 0.869        | 1.062        | 1.350        | 1.109        | 0.957        | 1.192        | 1.275         | 0.900         | 1.147         | C9JJQ8       | TUBA4A    | Tubulin alpha chain (Fragment)           |
| 1.009           | 1.015        | 0.977        | 1.001        | 1.031        | 0.983        | 1.024        | 1.051        | 1.022        | 0.978         | 0.957         | 0.957         | F5H5D3       | TUBA1C    | Tubulin alpha chain                      |
| 0.903           | 0.981        | 0.952        | 0.989        | 0.960        | 1.004        | 1.064        | 1.118        | 0.992        | 1.015         | 0.997         | 1.133         | A6NHL2       | TUBAL3    | Tubulin alpha chain-like 3               |
| 1.104           | 1.009        | 1.049        | 1.020        | 1.204        | 0.933        | 1.000        | 1.013        | 1.030        | 0.952         | 1.005         | 0.979         | Q71U36       | TUBA1A    | Tubulin alpha-1A chain                   |
| 1.186           | 0.998        | 1.048        | 1.056        | 1.604        | 0.970        | 1.105        | 0.890        | 1.191        | 0.981         | 0.925         | 0.994         | P68366       | TUBA4A    | Tubulin alpha-4A chain                   |
| 1.562           | 1.023        | 1.082        | 1.068        | 0.938        | 1.063        | 1.107        | 0.942        | 1.157        | 1.177         | 0.999         | 1.175         | G3V2A3       | TUBB3     | Tubulin beta chain (Fragment)            |
|                 |              |              |              |              |              | 0.972        | 1.159        | 1.056        | 0.898         | 0.893         | 1.179         | K7ES63       | TUBB6     | Tubulin beta chain (Fragment)            |
| 0.960           | 1.010        | 0.988        | 1.007        | 0.973        | 0.993        | 0.976        | 1.064        | 0.983        | 0.959         | 0.974         | 0.967         | P07437       | TUBB      | Tubulin beta chain                       |
| 0.991           | 1.004        | 0.972        | 1.058        | 0.944        | 0.891        | 1.040        | 1.029        | 0.889        | 1.051         | 0.975         | 0.960         | Q13885       | TUBB2A    | Tubulin beta-2A chain                    |
| 0.875           | 1.030        | 0.940        | 0.986        | 0.987        | 1.003        | 0.958        | 1.060        | 1.022        | 0.956         | 1.000         | 1.010         | Q9BVA1       | TUBB2B    | Tubulin beta-2B chain                    |
| 0.967           | 1.020        | 0.989        | 1.006        | 0.995        | 1.011        | 0.989        | 1.060        | 0.999        | 0.961         | 1.005         | 1.000         | Q13509       | TUBB3     | Tubulin beta-3 chain                     |
| 0.960           | 1.008        | 1.076        | 1.056        | 0.899        | 1.058        | 1.049        | 1.203        | 0.994        | 1.082         | 0.945         | 1.177         | M0QYM7       | TUBB4A    | Tubulin beta-4A chain (Fragment)         |
| 0.978           | 1.003        | 0.952        | 0.967        | 0.951        | 0.988        | 1.018        | 0.989        | 0.945        | 1.016         | 0.946         | 1.010         | P04350       | TUBB4A    | Tubulin beta-4A chain                    |

| Abundance Ratio |              |              |              |              |              |              |              |              |               |               |               | Accession ID | Gene name | Protein Description                                      |
|-----------------|--------------|--------------|--------------|--------------|--------------|--------------|--------------|--------------|---------------|---------------|---------------|--------------|-----------|----------------------------------------------------------|
| 1 d<br>M1/C1    | 1 d<br>M2/C2 | 1 d<br>M3/C3 | 4 d<br>M1/C1 | 4 d<br>M2/C2 | 4 d<br>M3/C3 | 7 d<br>M1/C1 | 7 d<br>M2/C2 | 7 d<br>M3/C3 | 10 d<br>M1/C1 | 10 d<br>M2/C2 | 10 d<br>M3/C3 |              |           |                                                          |
| 0.988           | 1.016        | 0.982        | 1.033        | 1.084        | 0.976        | 1.002        | 1.015        | 1.021        | 0.952         | 0.997         | 0.974         | P68371       | TUBB4B    | Tubulin beta-4B chain                                    |
| 0.950           | 1.008        | 0.969        | 1.047        | 0.994        | 0.986        | 1.020        | 1.038        | 1.017        | 1.020         | 0.959         | 1.002         | Q9BUF5       | TUBB6     | Tubulin beta-6 chain                                     |
|                 |              |              |              |              |              |              |              |              | 0.957         | 1.091         | 0.958         | Q9UJT0       | TUBE1     | Tubulin epsilon chain                                    |
| 0.977           | 0.998        | 1.004        | 1.115        | 0.905        | 1.048        | 1.056        | 0.959        | 0.987        | 1.031         | 0.982         | 1.001         | P23258       | TUBG1     | Tubulin gamma-1 chain                                    |
| 0.964           | 1.233        | 0.811        |              |              |              | 0.915        | 1.009        | 0.830        | 0.947         | 1.042         | 0.881         | Q9NRH3       | TUBG2     | Tubulin gamma-2 chain                                    |
| 1.022           | 0.969        | 1.013        | 0.961        | 1.043        | 1.001        | 0.980        | 1.045        | 1.012        | 1.036         | 0.970         | 1.074         | O94811       | TPPP      | Tubulin polymerization-promoting protein                 |
| 1.007           | 0.995        | 0.999        | 0.981        | 1.006        | 1.018        | 1.014        | 0.966        | 1.035        | 1.042         | 1.056         | 1.019         | Q99426       | TBCB      | Tubulin-folding cofactor B                               |
| 1.002           | 0.991        | 0.963        | 1.005        | 0.986        | 1.017        | 1.028        | 1.035        | 0.974        | 1.071         | 1.047         | 0.995         | E5RJD8       | TBCA      | Tubulin-specific chaperone A                             |
| 1.115           | 0.962        | 1.037        | 1.009        | 0.949        | 1.035        | 1.099        | 0.864        | 1.021        | 1.007         | 0.975         | 0.963         | Q15814       | TBCC      | Tubulin-specific chaperone C                             |
| 0.963           | 0.993        | 1.000        | 0.949        | 0.998        | 1.052        | 1.016        | 1.075        | 1.129        | 0.818         | 0.853         | 1.025         | Q5QJ74       | TBCEL     | Tubulin-specific chaperone cofactor E-like protein       |
| 1.000           | 1.026        | 0.996        | 0.994        | 0.990        | 1.048        | 1.006        | 1.079        | 1.070        | 1.003         | 1.016         | 1.053         | J3KR97       | TBCD      | Tubulin-specific chaperone D                             |
| 0.973           | 1.007        | 1.015        | 0.993        | 1.023        | 1.011        | 0.997        | 1.018        | 1.056        | 0.967         | 0.984         | 1.033         | Q15813       | TBCE      | Tubulin-specific chaperone E                             |
| 1.052           | 1.047        | 1.049        | 0.981        | 0.956        | 1.031        | 1.036        | 1.023        | 1.009        | 0.989         | 1.024         | 1.010         | Q8NG68       | TTL       | Tubulin--tyrosine ligase                                 |
| 1.005           | 0.998        | 1.005        | 0.996        | 0.980        | 0.986        | 1.000        | 1.058        | 1.048        | 1.004         | 1.005         | 1.016         | Q14166       | TLL12     | Tubulin--tyrosine ligase-like protein 12                 |
| 1.033           | 0.902        | 1.010        | 1.022        | 1.013        | 1.007        | 1.110        | 1.025        | 1.041        | 1.115         | 1.100         | 1.063         | F6TB26       | TDRKH     | Tudor and KH domain-containing protein                   |
| 0.997           | 1.016        | 1.017        | 0.963        | 0.961        | 0.958        | 1.019        | 1.075        | 1.015        | 0.978         | 0.929         | 1.055         | Q8NHU6       | TDRD7     | Tudor domain-containing protein 7                        |
| 1.023           | 1.025        | 1.004        | 1.008        | 0.954        | 1.045        | 1.050        | 1.119        | 1.075        | 1.017         | 0.974         | 1.052         | Q9BRJ7       | NUDT16L1  | Tudor-interacting repair regulator protein               |
| 1.016           | 1.017        | 0.992        | 0.988        | 1.000        | 1.188        | 1.175        | 1.206        | 1.280        |               |               |               | Q9NNX1       | TUFT1     | Tuftelin                                                 |
| 1.047           | 1.001        | 1.056        | 1.015        | 0.981        | 1.033        | 0.998        | 0.982        | 0.994        | 1.045         | 0.977         | 1.010         | Q9UBB9       | TFIP11    | Tuftelin-interacting protein 11                          |
|                 |              |              | 1.091        | 0.897        | 0.867        | 0.936        | 1.142        | 1.034        |               |               |               | HOYKR7       | TNFAIP2   | Tumor necrosis factor alpha-induced protein 2 (Fragment) |
| 1.031           | 1.063        | 1.068        | 1.023        | 1.060        | 1.030        | 1.113        | 1.129        | 1.044        | 1.000         | 0.949         | 1.091         | Q03169       | TNFAIP2   | Tumor necrosis factor alpha-induced protein 2            |
| 0.985           | 1.030        | 0.985        | 0.949        | 1.013        | 0.999        | 0.976        | 0.869        | 0.963        | 1.019         | 1.001         | 1.066         | P21580       | TNFAIP3   | Tumor necrosis factor alpha-induced protein 3            |
|                 |              |              | 0.968        | 0.990        | 1.028        | 0.968        | 1.056        | 0.961        | 0.863         | 1.021         | 0.952         | P41273       | TNFSF9    | Tumor necrosis factor ligand superfamily member 9        |
|                 |              |              | 1.089        | 0.840        | 1.033        | 1.158        | 1.053        | 1.126        | 1.234         | 1.037         | 1.002         | O00220       | TNFRSF10A | Tumor necrosis factor receptor superfamily member 10A    |
|                 |              |              | 0.985        | 1.001        | 1.178        | 1.004        | 1.022        | 1.061        | 1.040         | 1.042         | 1.040         | O14763       | TNFRSF10B | Tumor necrosis factor receptor superfamily member 10B    |
| 1.076           | 1.184        | 0.915        | 1.048        | 0.831        | 1.012        | 1.021        | 1.011        | 0.983        | 1.037         | 0.852         | 1.110         | O00300       | TNFRSF11B | Tumor necrosis factor receptor superfamily member 11B    |
|                 |              |              |              |              |              | 1.081        | 1.134        | 0.906        | 1.222         | 0.894         | 1.190         | Q9NP84       | TNFRSF12A | Tumor necrosis factor receptor superfamily member 12A    |
|                 |              |              | 1.049        | 1.836        | 1.030        | 1.278        | 0.586        | 1.119        | 1.009         | 0.955         | 1.123         | P25942       | CD40      | Tumor necrosis factor receptor superfamily member 5      |

| Abundance Ratio |              |              |              |              |              |              |              |              |               |               |               | Accession ID | Gene name | Protein Description                                                      |
|-----------------|--------------|--------------|--------------|--------------|--------------|--------------|--------------|--------------|---------------|---------------|---------------|--------------|-----------|--------------------------------------------------------------------------|
| 1 d<br>M1/C1    | 1 d<br>M2/C2 | 1 d<br>M3/C3 | 4 d<br>M1/C1 | 4 d<br>M2/C2 | 4 d<br>M3/C3 | 7 d<br>M1/C1 | 7 d<br>M2/C2 | 7 d<br>M3/C3 | 10 d<br>M1/C1 | 10 d<br>M2/C2 | 10 d<br>M3/C3 |              |           |                                                                          |
| 1.002           | 1.057        | 1.033        | 1.039        | 1.040        | 1.028        | 1.093        | 1.028        | 1.042        | 1.143         | 1.046         | 1.154         | P25445       | FAS       | Tumor necrosis factor receptor superfamily member 6                      |
| 0.994           | 1.008        | 0.998        | 0.992        | 0.913        | 1.057        | 1.026        | 0.954        | 1.023        | 1.051         | 0.963         | 1.122         | Q15628       | TRADD     | Tumor necrosis factor receptor type 1-associated<br>DEATH domain protein |
| 1.056           | 0.910        | 1.008        | 0.984        | 0.909        | 0.934        | 0.965        | 0.965        | 0.987        | 1.000         | 0.951         | 1.027         | J3KNE7       | TPD52L1   | Tumor protein D53                                                        |
| 0.760           | 1.307        | 1.038        | 0.885        | 1.043        | 1.066        | 0.962        | 0.615        | 0.922        |               |               |               | Q8IXH6       | TP53INP2  | Tumor protein p53-inducible nuclear protein 2                            |
| 0.991           | 0.969        | 0.976        | 1.005        | 0.970        | 1.024        | 1.034        | 1.140        | 1.066        | 1.032         | 1.016         | 1.017         | Q5T0D9       | TPRG1L    | Tumor protein p63-regulated gene 1-like protein                          |
| 0.919           | 0.964        | 0.897        | 1.017        | 1.065        | 1.280        | 1.244        | 0.868        | 0.964        | 1.156         | 1.077         | 1.216         | Q8N726       | CDKN2A    | Tumor suppressor ARF                                                     |
| 1.001           | 0.864        | 0.994        | 1.003        | 0.873        | 1.031        | 1.087        | 1.097        | 1.021        | 1.071         | 1.023         | 1.023         | O75896       | TUSC2     | Tumor suppressor candidate 2                                             |
| 0.847           | 1.103        | 0.965        | 0.881        | 0.924        | 1.049        | 1.008        | 1.033        | 1.010        | 0.985         | 1.003         | 1.081         | Q13454       | TUSC3     | Tumor suppressor candidate 3                                             |
| 0.902           | 0.970        | 1.010        | 1.007        | 0.989        | 1.226        | 1.064        | 1.087        | 0.991        | 1.015         | 1.057         | 1.087         | Q2TAM9       | TUSC1     | Tumor suppressor candidate gene 1 protein                                |
| 1.043           | 1.006        | 1.018        | 1.011        | 0.992        | 1.002        | 1.010        | 1.058        | 1.005        | 0.998         | 1.001         | 1.035         | Q99816       | TSG101    | Tumor susceptibility gene 101 protein                                    |
| 1.016           | 0.991        | 0.979        | 0.994        | 1.007        | 0.976        | 1.009        | 1.039        | 1.035        | 1.004         | 0.977         | 1.022         | A8MUM1       | TSSC1     | Tumor-suppressing subtransferable candidate 1                            |
| 1.029           | 1.004        | 0.997        | 1.021        | 1.007        | 1.000        | 1.027        | 1.075        | 1.009        | 0.983         | 1.009         | 0.996         | Q12792       | TWF1      | Twinfilin-1                                                              |
| 0.999           | 0.996        | 0.979        | 1.000        | 0.973        | 0.989        | 0.997        | 1.050        | 0.988        | 0.943         | 0.973         | 0.925         | Q6IBS0       | TWF2      | Twinfilin-2                                                              |
| 0.899           | 0.989        | 1.123        | 0.993        | 0.783        | 0.933        | 0.983        | 1.082        | 1.046        | 0.959         | 0.886         | 1.032         | Q96RR1       | TWINK     | Twinkle protein, mitochondrial                                           |
| 0.922           | 1.001        | 1.092        |              |              |              | 1.295        | 0.724        | 1.068        | 1.076         | 0.946         | 1.080         | Q9GZX9       | TWSG1     | Twisted gastrulation protein homolog 1                                   |
| 0.923           | 0.968        | 1.118        | 1.022        | 0.881        | 1.144        | 1.018        | 0.939        | 1.032        | 1.116         | 1.022         | 1.063         | Q8N4L2       | TMEM55A   | Type 2 phosphatidylinositol 4,5-bisphosphate 4-<br>phosphatase           |
| 1.033           | 0.946        | 1.081        | 1.311        | 0.874        | 1.215        | 0.868        | 0.865        | 0.921        | 0.957         | 1.014         | 0.980         | Q14642       | INPP5A    | Type I inositol 1,4,5-trisphosphate 5-phosphatase                        |
| 1.078           | 1.008        | 1.092        | 0.977        | 0.915        | 0.988        | 1.062        | 1.202        | 0.981        | 1.020         | 0.981         | 1.061         | Q96PE3       | INPP4A    | Type I inositol 3,4-bisphosphate 4-phosphatase                           |
| 1.044           | 0.956        | 1.027        | 1.003        | 0.915        | 1.044        | 1.026        | 0.980        | 0.990        | 0.992         | 1.031         | 1.048         | P32019       | INPP5B    | Type II inositol 1,4,5-trisphosphate 5-phosphatase                       |
|                 |              |              |              |              |              |              |              |              | 1.100         | 0.975         | 1.151         | Q6RW13       | AGTRAP    | Type-1 angiotensin II receptor-associated protein                        |
| 1.000           | 0.988        | 1.003        | 0.997        | 0.984        | 1.007        | 1.020        | 1.013        | 1.016        | 1.014         | 1.004         | 1.051         | Q9UIG0       | BAZ1B     | Tyrosine-protein kinase BAZ1B                                            |
| 0.948           | 0.964        | 0.997        | 0.963        | 0.935        | 1.029        | 0.969        | 1.028        | 1.030        | 0.951         | 0.912         | 1.054         | P41240       | CSK       | Tyrosine-protein kinase CSK                                              |
| 1.020           | 1.015        | 1.016        | 0.972        | 0.864        | 1.075        | 1.075        | 1.076        | 0.991        | 0.977         | 0.979         | 1.094         | P16591       | FER       | Tyrosine-protein kinase Fer                                              |
| 1.002           | 1.029        | 1.045        | 1.027        | 1.033        | 1.058        | 1.075        | 1.004        | 1.061        | 1.069         | 0.979         | 1.186         | P23458       | JAK1      | Tyrosine-protein kinase JAK1                                             |
| 1.004           | 1.000        | 1.012        | 1.017        | 0.944        | 1.015        | 1.087        | 1.107        | 1.003        | 1.016         | 1.018         | 1.000         | P07948       | LYN       | Tyrosine-protein kinase Lyn                                              |
| 1.000           | 1.086        | 1.104        | 0.996        | 0.964        | 1.033        | 1.026        | 1.053        | 1.013        | 1.132         | 1.091         | 1.037         | J3QRU1       | YES1      | Tyrosine-protein kinase                                                  |
| 1.053           | 1.037        | 0.981        | 1.004        | 0.932        | 0.981        | 1.021        | 1.093        | 1.062        | 0.997         | 0.968         | 1.090         | P30530       | AXL       | Tyrosine-protein kinase receptor UFO                                     |
| 1.029           | 1.111        | 1.060        | 1.013        | 0.877        | 1.019        | 1.035        | 1.082        | 1.002        | 0.981         | 0.999         | 0.989         | Q86YV5       | SGK223    | Tyrosine-protein kinase Sgk223                                           |
| 0.961           | 0.977        | 1.018        | 0.988        | 0.959        | 1.001        | 1.005        | 0.952        | 0.981        | 1.020         | 0.986         | 1.041         | P18031       | PTPN1     | Tyrosine-protein phosphatase non-receptor type 1                         |

| Abundance Ratio |              |              |              |              |              |              |              |              |               |               |               | Accession ID | Gene name | Protein Description                                        |
|-----------------|--------------|--------------|--------------|--------------|--------------|--------------|--------------|--------------|---------------|---------------|---------------|--------------|-----------|------------------------------------------------------------|
| 1 d<br>M1/C1    | 1 d<br>M2/C2 | 1 d<br>M3/C3 | 4 d<br>M1/C1 | 4 d<br>M2/C2 | 4 d<br>M3/C3 | 7 d<br>M1/C1 | 7 d<br>M2/C2 | 7 d<br>M3/C3 | 10 d<br>M1/C1 | 10 d<br>M2/C2 | 10 d<br>M3/C3 |              |           |                                                            |
| 0.932           | 0.963        | 0.950        | 0.954        | 0.992        | 1.100        | 0.866        | 1.021        | 1.111        | 1.020         | 0.958         | 1.149         | Q06124       | PTPN11    | Tyrosine-protein phosphatase non-receptor type 11          |
| 1.024           | 1.016        | 1.027        | 1.016        | 1.008        | 1.011        | 1.042        | 1.000        | 1.021        | 1.030         | 0.992         | 1.083         | Q05209       | PTPN12    | Tyrosine-protein phosphatase non-receptor type 12          |
| 0.991           | 1.032        | 0.978        | 1.022        | 0.999        | 0.981        | 0.998        | 1.017        | 1.014        | 1.042         | 0.966         | 1.028         | Q15678       | PTPN14    | Tyrosine-protein phosphatase non-receptor type 14          |
| 1.095           | 1.259        | 1.002        |              |              |              | 1.105        | 0.810        | 0.893        |               |               |               | Q99952       | PTPN18    | Tyrosine-protein phosphatase non-receptor type 18          |
| 1.010           | 1.026        | 1.015        | 1.007        | 0.983        | 1.017        | 1.034        | 1.068        | 1.055        | 0.967         | 0.985         | 1.029         | P17706       | PTPN2     | Tyrosine-protein phosphatase non-receptor type 2           |
| 1.000           | 0.992        | 1.007        | 1.004        | 0.994        | 1.043        | 0.995        | 1.036        | 0.992        | 1.006         | 0.990         | 1.014         | Q9H3S7       | PTPN23    | Tyrosine-protein phosphatase non-receptor type 23          |
| 1.052           | 0.986        | 0.970        | 1.000        | 0.865        | 1.046        | 1.041        | 1.131        | 1.004        | 1.117         | 0.985         | 1.054         | P26045       | PTPN3     | Tyrosine-protein phosphatase non-receptor type 3           |
| 0.973           | 1.077        | 1.005        | 1.008        | 0.921        | 0.961        | 1.088        | 0.901        | 0.924        | 1.039         | 1.032         | 0.931         | P43378       | PTPN9     | Tyrosine-protein phosphatase non-receptor type 9           |
| 1.012           | 1.023        | 1.016        | 1.040        | 0.992        | 1.046        | 1.074        | 1.005        | 1.012        | 1.090         | 1.032         | 1.110         | P78324       | SIRPA     | Tyrosine-protein phosphatase non-receptor type substrate 1 |
| 0.983           | 1.002        | 0.998        | 1.003        | 1.035        | 1.001        | 0.966        | 0.994        | 1.008        | 0.958         | 1.009         | 0.950         | P54577       | YARS      | Tyrosine--tRNA ligase, cytoplasmic                         |
| 0.986           | 0.987        | 1.001        | 0.982        | 0.980        | 1.004        | 0.990        | 1.050        | 0.986        | 1.000         | 0.959         | 0.984         | Q9Y2Z4       | YARS2     | Tyrosine--tRNA ligase, mitochondrial                       |
| 1.070           | 1.003        | 0.961        | 0.998        | 0.960        | 0.994        | 0.994        | 1.120        | 1.013        | 1.037         | 1.003         | 1.033         | Q9NUW8       | TDP1      | Tyrosyl-DNA phosphodiesterase 1                            |
| 1.172           | 0.985        | 0.993        | 0.960        | 0.945        | 0.961        |              |              |              |               |               |               | P08621       | SNRNP70   | U1 small nuclear ribonucleoprotein 70 kDa                  |
| 0.984           | 0.989        | 1.011        | 0.958        | 0.972        | 0.976        | 0.932        | 0.889        | 0.957        | 0.955         | 1.021         | 0.968         | P09012       | SNRPA     | U1 small nuclear ribonucleoprotein A                       |
| 0.952           | 0.973        | 0.933        | 0.961        | 1.005        | 0.979        | 0.958        | 0.966        | 0.964        | 1.014         | 0.996         | 0.972         | A0A0A0MRR7   | SNRPC     | U1 small nuclear ribonucleoprotein C                       |
|                 |              |              | 0.950        | 1.019        | 1.143        |              |              |              | 0.977         | 0.870         | 0.978         | Q6IEG0       | SNRNP48   | U11/U12 small nuclear ribonucleoprotein 48 kDa protein     |
| 1.015           | 0.991        | 1.016        | 0.982        | 0.967        | 1.024        | 0.950        | 0.997        | 0.987        | 0.978         | 1.012         | 0.981         | P09661       | SNRPA1    | U2 small nuclear ribonucleoprotein A'                      |
| 0.981           | 0.966        | 0.969        | 1.005        | 1.007        | 1.029        | 1.000        | 0.937        | 0.959        | 1.052         | 1.048         | 1.042         | P08579       | SNRPB2    | U2 small nuclear ribonucleoprotein B''                     |
| 1.040           | 1.012        | 1.034        | 1.012        | 0.981        | 1.002        | 0.996        | 1.017        | 1.002        | 0.979         | 0.974         | 0.997         | O15042       | U2SURP    | U2 snRNP-associated SURP motif-containing protein          |
| 1.008           | 0.978        | 1.004        | 0.982        | 0.938        | 1.002        | 0.963        | 1.048        | 1.041        | 0.967         | 1.027         | 1.000         | Q9NV31       | IMP3      | U3 small nucleolar ribonucleoprotein protein IMP3          |
| 1.012           | 1.044        | 1.072        | 0.996        | 1.086        | 1.180        | 0.989        | 1.040        | 1.065        | 1.008         | 1.056         | 1.278         | Q96G21       | IMP4      | U3 small nucleolar ribonucleoprotein protein IMP4          |
| 0.996           | 0.996        | 0.968        | 1.013        | 0.962        | 0.995        | 1.055        | 1.062        | 1.013        | 1.042         | 0.984         | 1.002         | O00566       | MPHOSPH10 | U3 small nucleolar ribonucleoprotein protein MPP10         |
| 1.007           | 0.984        | 1.001        | 0.995        | 0.956        | 1.025        | 0.996        | 1.031        | 1.024        | 1.016         | 1.025         | 1.021         | Q9BVJ6       | UTP14A    | U3 small nucleolar RNA-associated protein 14 homolog A     |

| Abundance Ratio |              |              |              |              |              |              |              |              |               |               |               | Accession ID | Gene name | Protein Description                                     |
|-----------------|--------------|--------------|--------------|--------------|--------------|--------------|--------------|--------------|---------------|---------------|---------------|--------------|-----------|---------------------------------------------------------|
| 1 d<br>M1/C1    | 1 d<br>M2/C2 | 1 d<br>M3/C3 | 4 d<br>M1/C1 | 4 d<br>M2/C2 | 4 d<br>M3/C3 | 7 d<br>M1/C1 | 7 d<br>M2/C2 | 7 d<br>M3/C3 | 10 d<br>M1/C1 | 10 d<br>M2/C2 | 10 d<br>M3/C3 |              |           |                                                         |
| 1.068           | 1.003        | 1.029        | 1.022        | 0.949        | 0.969        | 1.029        | 1.077        | 1.029        | 0.981         | 1.022         | 1.016         | Q8TED0       | UTP15     | U3 small nucleolar RNA-associated protein 15 homolog    |
| 0.990           | 1.032        | 0.994        | 1.009        | 0.958        | 1.009        | 0.996        | 1.026        | 1.013        | 1.017         | 1.045         | 1.016         | Q9Y5J1       | UTP18     | U3 small nucleolar RNA-associated protein 18 homolog    |
| 1.019           | 1.006        | 1.005        | 0.985        | 0.963        | 1.005        | 1.008        | 1.071        | 1.002        | 1.011         | 1.008         | 0.993         | Q969X6       | UTP4      | U3 small nucleolar RNA-associated protein 4 homolog     |
| 0.986           | 0.969        | 1.050        | 0.969        | 0.900        | 1.001        | 0.987        | 0.981        | 0.989        | 0.991         | 1.017         | 1.010         | Q9NYH9       | UTP6      | U3 small nucleolar RNA-associated protein 6 homolog     |
| 1.019           | 1.026        | 1.018        | 1.007        | 1.054        | 1.024        | 1.046        | 0.999        | 1.084        | 0.993         | 1.031         | 1.039         | O43818       | RRP9      | U3 small nucleolar RNA-interacting protein 2            |
| 1.025           | 0.996        | 1.052        | 0.984        | 0.978        | 1.057        | 0.996        | 0.971        | 1.038        | 0.994         | 1.033         | 1.038         | O43395       | PRPF3     | U4/U6 small nuclear ribonucleoprotein Prp3              |
| 0.965           | 1.013        | 0.971        | 0.993        | 1.006        | 1.021        | 0.991        | 1.044        | 0.983        | 1.013         | 1.034         | 1.009         | Q8WWY3       | PRPF31    | U4/U6 small nuclear ribonucleoprotein Prp31             |
| 0.996           | 1.016        | 1.004        | 0.979        | 0.996        | 1.008        | 1.005        | 1.083        | 1.007        | 1.002         | 0.997         | 1.017         | O43172       | PRPF4     | U4/U6 small nuclear ribonucleoprotein Prp4              |
| 1.069           | 1.017        | 0.999        | 1.029        | 0.950        | 0.963        | 0.996        | 1.120        | 0.934        | 1.015         | 1.035         | 0.982         | Q8WVK2       | SNRNP27   | U4/U6.U5 small nuclear ribonucleoprotein 27 kDa protein |
| 1.011           | 0.998        | 1.010        | 0.977        | 0.974        | 0.988        | 0.997        | 0.995        | 0.991        | 1.002         | 0.997         | 1.011         | O43290       | SART1     | U4/U6.U5 tri-snRNP-associated protein 1                 |
| 1.016           | 0.986        | 1.024        | 1.005        | 1.001        | 1.009        | 1.006        | 0.994        | 1.026        | 1.035         | 0.981         | 1.027         | Q53GS9       | USP39     | U4/U6.U5 tri-snRNP-associated protein 2                 |
| 0.996           | 0.999        | 1.012        | 0.997        | 0.999        | 1.025        | 0.998        | 1.048        | 1.004        | 0.974         | 1.000         | 0.981         | O75643       | SNRNP200  | U5 small nuclear ribonucleoprotein 200 kDa helicase     |
| 1.015           | 1.023        | 0.976        | 0.986        | 1.007        | 0.990        | 0.971        | 1.075        | 1.003        | 0.994         | 1.014         | 1.016         | Q96DI7       | SNRNP40   | U5 small nuclear ribonucleoprotein 40 kDa protein       |
| 1.120           | 1.105        | 1.004        | 1.042        | 0.984        | 0.987        | 1.008        | 1.222        | 1.047        | 0.907         | 0.927         | 0.987         | Q9BQ65       | USB1      | U6 snRNA phosphodiesterase                              |
| 1.108           | 0.963        | 1.055        | 0.930        | 0.950        | 1.039        | 0.880        | 1.020        | 1.123        | 0.937         | 0.983         | 0.998         | O15116       | LSM1      | U6 snRNA-associated Sm-like protein LSM1                |
| 1.030           | 1.006        | 0.994        | 0.992        | 0.971        | 0.950        | 0.937        | 1.073        | 0.994        | 0.908         | 1.023         | 0.914         | Q9Y333       | LSM2      | U6 snRNA-associated Sm-like protein LSM2                |
| 1.071           | 0.986        | 1.015        | 1.031        | 0.931        | 0.951        | 0.965        | 1.060        | 1.013        | 0.865         | 0.975         | 0.946         | P62310       | LSM3      | U6 snRNA-associated Sm-like protein LSM3                |
| 0.978           | 0.999        | 1.021        | 1.005        | 1.144        | 1.005        | 1.003        | 0.991        | 1.020        | 0.999         | 1.023         | 0.996         | V9GZ56       | LSM4      | U6 snRNA-associated Sm-like protein LSM4 (Fragment)     |
| 0.883           | 0.729        | 1.018        | 1.013        | 0.978        | 1.084        | 0.906        | 0.929        | 1.044        | 0.808         | 0.961         | 1.106         | Q9Y4Y9       | LSM5      | U6 snRNA-associated Sm-like protein LSM5                |
| 1.049           | 0.972        | 0.973        | 1.001        | 0.989        | 1.006        | 0.982        | 1.032        | 0.919        | 0.991         | 1.007         | 0.974         | P62312       | LSM6      | U6 snRNA-associated Sm-like protein LSM6                |
| 0.983           | 0.921        | 0.963        | 0.985        | 1.064        | 1.032        | 1.058        | 0.995        | 1.049        | 0.959         | 0.989         | 0.998         | Q9UK45       | LSM7      | U6 snRNA-associated Sm-like protein LSM7                |
| 0.997           | 1.003        | 1.034        | 1.006        | 1.022        | 1.107        | 0.980        | 1.073        | 1.057        | 1.030         | 1.069         | 0.990         | O95777       | LSM8      | U6 snRNA-associated Sm-like protein LSM8                |
|                 |              |              | 0.917        | 0.724        | 1.134        |              |              |              |               |               |               | Q969L4       | LSM10     | U7 snRNA-associated Sm-like protein LSM10               |
| 1.028           | 0.990        | 1.050        | 0.998        | 0.963        | 1.095        | 0.944        | 1.048        | 1.106        | 1.005         | 0.979         | 1.042         | Q96DE0       | NUDT16    | U8 snoRNA-decapping enzyme                              |
| 1.050           | 1.005        | 0.978        | 1.007        | 0.958        | 1.032        | 0.991        | 1.043        | 0.991        | 0.973         | 0.997         | 0.995         | Q96QD9       | FYTTD1    | UAP56-interacting factor                                |
| 0.999           | 0.942        | 1.018        | 0.933        | 0.948        | 1.054        | 1.013        | 1.168        | 1.057        | 0.979         | 1.021         | 1.047         | Q9Y5Z9       | UBIAD1    | UbiA prenyltransferase domain-containing protein 1      |
| 1.045           | 0.983        | 1.020        | 0.916        | 0.900        | 0.931        |              |              |              |               |               |               | Q9NPG3       | UBN1      | Ubinuclein-1                                            |
| 0.974           | 1.011        | 0.966        | 0.946        | 0.936        | 0.985        | 0.973        | 1.148        | 1.021        | 0.952         | 1.059         | 0.947         | Q9UMX0       | UBQLN1    | Ubiquilin-1                                             |

| Abundance Ratio |              |              |              |              |              |              |              |              |               |               |               | Accession ID | Gene name | Protein Description                                         |
|-----------------|--------------|--------------|--------------|--------------|--------------|--------------|--------------|--------------|---------------|---------------|---------------|--------------|-----------|-------------------------------------------------------------|
| 1 d<br>M1/C1    | 1 d<br>M2/C2 | 1 d<br>M3/C3 | 4 d<br>M1/C1 | 4 d<br>M2/C2 | 4 d<br>M3/C3 | 7 d<br>M1/C1 | 7 d<br>M2/C2 | 7 d<br>M3/C3 | 10 d<br>M1/C1 | 10 d<br>M2/C2 | 10 d<br>M3/C3 |              |           |                                                             |
| 0.988           | 1.009        | 0.978        | 1.009        | 0.986        | 0.984        | 0.966        | 1.099        | 0.993        | 0.956         | 1.036         | 1.000         | Q9UHD9       | UBQLN2    | Ubiquilin-2                                                 |
| 1.076           | 1.021        | 0.995        | 0.998        | 0.920        | 0.972        | 1.026        | 1.114        | 1.012        | 0.997         | 1.021         | 1.002         | Q9NRR5       | UBQLN4    | Ubiquilin-4                                                 |
| 0.963           | 1.007        | 0.955        | 0.970        | 1.013        | 1.018        | 1.007        | 1.009        | 1.015        | 0.992         | 1.004         | 0.976         | Q9NVA1       | UQCC1     | Ubiquinol-cytochrome-c reductase complex assembly factor 1  |
| 1.059           | 1.035        | 0.955        | 1.016        | 1.051        | 0.990        | 1.053        | 0.980        | 0.978        | 1.082         | 0.970         | 0.979         | Q9BRT2       | UQCC2     | Ubiquinol-cytochrome-c reductase complex assembly factor 2  |
| 1.015           | 0.949        | 1.081        | 0.882        | 0.833        | 0.915        | 0.879        | 0.891        | 1.025        | 0.891         | 1.113         | 0.897         | Q6UW78       | UQCC3     | Ubiquinol-cytochrome-c reductase complex assembly factor 3  |
| 0.966           | 0.930        | 1.093        | 0.877        | 1.013        | 1.020        | 0.921        | 0.996        | 1.039        | 0.892         | 0.925         | 1.079         | Q9Y2Z9       | COQ6      | Ubiquinone biosynthesis monooxygenase COQ6, mitochondrial   |
| 0.960           | 0.934        | 0.982        | 0.969        | 0.956        | 1.017        | 1.009        | 1.014        | 1.098        | 0.969         | 0.967         | 1.018         | Q9NZJ6       | COQ3      | Ubiquinone biosynthesis O-methyltransferase, mitochondrial  |
| 1.125           | 1.047        | 1.127        |              |              |              |              |              |              |               |               |               | Q9Y3A0       | COQ4      | Ubiquinone biosynthesis protein COQ4 homolog, mitochondrial |
| 1.007           | 0.987        | 1.026        | 0.964        | 0.939        | 1.016        | 0.959        | 0.951        | 0.964        | 0.987         | 0.979         | 1.004         | O75208       | COQ9      | Ubiquinone biosynthesis protein COQ9, mitochondrial         |
|                 |              |              | 1.092        | 0.850        | 0.932        |              |              |              |               |               |               | O94782       | USP1      | Ubiquitin carboxyl-terminal hydrolase 1                     |
| 1.019           | 1.001        | 1.070        | 1.049        | 0.920        | 1.016        | 1.021        | 0.957        | 1.041        | 1.119         | 0.954         | 1.056         | P51784       | USP11     | Ubiquitin carboxyl-terminal hydrolase 11                    |
| 1.068           | 1.033        | 1.063        | 1.053        | 1.053        | 1.047        | 0.899        | 0.928        | 1.137        | 0.920         | 1.065         | 1.053         | O75317       | USP12     | Ubiquitin carboxyl-terminal hydrolase 12                    |
| 0.980           | 1.009        | 1.036        | 0.980        | 0.938        | 1.102        | 1.185        | 1.088        | 1.026        | 1.109         | 1.254         | 1.276         | Q92995       | USP13     | Ubiquitin carboxyl-terminal hydrolase 13                    |
| 0.997           | 0.987        | 1.004        | 0.999        | 0.984        | 1.025        | 0.987        | 0.979        | 0.959        | 1.010         | 0.999         | 1.003         | P54578       | USP14     | Ubiquitin carboxyl-terminal hydrolase 14                    |
| 1.004           | 1.006        | 0.994        | 1.008        | 0.987        | 1.019        | 0.995        | 1.061        | 1.019        | 0.983         | 0.992         | 0.982         | Q9Y4E8       | USP15     | Ubiquitin carboxyl-terminal hydrolase 15                    |
|                 |              |              | 0.926        | 0.964        | 1.227        | 0.954        | 1.010        | 1.067        | 1.014         | 0.982         | 0.997         | Q9Y5T5       | USP16     | Ubiquitin carboxyl-terminal hydrolase 16                    |
|                 |              |              |              |              |              |              |              |              | 0.988         | 1.465         | 1.291         | O75604       | USP2      | Ubiquitin carboxyl-terminal hydrolase 2                     |
|                 |              |              | 0.957        | 0.909        | 0.797        |              |              |              |               |               |               | Q9Y2K6       | USP20     | Ubiquitin carboxyl-terminal hydrolase 20                    |
| 0.995           | 0.988        | 1.012        | 1.027        | 1.176        | 1.072        | 1.004        | 0.999        | 1.034        | 1.045         | 0.964         | 1.068         | Q9UPT9       | USP22     | Ubiquitin carboxyl-terminal hydrolase 22                    |
| 0.981           | 1.020        | 1.025        | 1.001        | 0.964        | 1.001        | 1.013        | 1.036        | 1.042        | 1.000         | 1.013         | 1.040         | Q9UPU5       | USP24     | Ubiquitin carboxyl-terminal hydrolase 24                    |
| 1.009           | 0.974        | 1.041        | 0.999        | 1.007        | 1.003        | 0.978        | 1.032        | 0.961        | 1.005         | 1.011         | 1.066         | Q9UHP3       | USP25     | Ubiquitin carboxyl-terminal hydrolase 25                    |
| 1.007           | 0.924        | 1.020        | 0.968        | 0.911        | 1.017        | 0.989        | 0.946        | 1.010        | 0.960         | 0.943         | 0.977         | Q96RU2       | USP28     | Ubiquitin carboxyl-terminal hydrolase 28                    |
| 1.027           | 0.980        | 0.991        | 1.050        | 1.367        | 0.956        | 1.156        | 0.897        | 1.098        | 0.971         | 0.958         | 0.933         | Q9Y6I4       | USP3      | Ubiquitin carboxyl-terminal hydrolase 3                     |
| 0.948           | 0.937        | 0.980        | 1.329        | 0.781        | 1.113        | 0.948        | 1.517        | 1.028        | 1.118         | 1.112         | 1.072         | Q70CQ3       | USP30     | Ubiquitin carboxyl-terminal hydrolase 30                    |
|                 |              |              | 1.048        | 1.022        | 1.138        | 0.916        | 1.003        | 1.110        | 1.148         | 1.042         | 0.951         | Q70CQ4       | USP31     | Ubiquitin carboxyl-terminal hydrolase 31                    |
| 1.074           | 1.026        | 1.081        | 1.056        | 0.878        | 0.915        | 1.050        | 1.060        | 0.947        | 0.920         | 1.024         | 1.031         | Q8NFA0       | USP32     | Ubiquitin carboxyl-terminal hydrolase 32                    |
| 1.008           | 1.009        | 1.071        | 1.024        | 1.092        | 0.910        | 1.130        | 1.017        | 1.064        |               |               |               | Q8TEY7       | USP33     | Ubiquitin carboxyl-terminal hydrolase 33                    |
| 1.021           | 1.034        | 1.012        | 1.019        | 0.958        | 1.034        | 1.019        | 1.099        | 1.001        | 1.037         | 0.998         | 1.109         | Q70CQ2       | USP34     | Ubiquitin carboxyl-terminal hydrolase 34                    |
|                 |              |              | 1.104        | 0.967        | 1.157        |              |              |              |               |               |               | Q9P2H5       | USP35     | Ubiquitin carboxyl-terminal hydrolase 35                    |



| Abundance Ratio |              |              |              |              |              |              |              |              |               |               |               | Accession ID | Gene name | Protein Description                                      |
|-----------------|--------------|--------------|--------------|--------------|--------------|--------------|--------------|--------------|---------------|---------------|---------------|--------------|-----------|----------------------------------------------------------|
| 1 d<br>M1/C1    | 1 d<br>M2/C2 | 1 d<br>M3/C3 | 4 d<br>M1/C1 | 4 d<br>M2/C2 | 4 d<br>M3/C3 | 7 d<br>M1/C1 | 7 d<br>M2/C2 | 7 d<br>M3/C3 | 10 d<br>M1/C1 | 10 d<br>M2/C2 | 10 d<br>M3/C3 |              |           |                                                          |
| 0.927           | 0.888        | 1.183        |              |              |              | 1.156        | 0.925        | 1.049        | 1.069         | 1.174         | 1.133         | Q86T82       | USP37     | Ubiquitin carboxyl-terminal hydrolase 37                 |
| 1.011           | 0.996        | 1.000        | 1.005        | 0.962        | 1.053        | 0.965        | 1.110        | 1.030        | 1.009         | 0.982         | 1.025         | Q13107       | USP4      | Ubiquitin carboxyl-terminal hydrolase 4                  |
| 1.009           | 1.000        | 1.003        | 0.999        | 0.996        | 0.995        | 0.985        | 1.004        | 1.011        | 1.012         | 0.991         | 1.013         | P45974       | USP5      | Ubiquitin carboxyl-terminal hydrolase 5                  |
| 0.990           | 1.013        | 1.012        | 1.002        | 0.975        | 1.027        | 1.008        | 1.049        | 0.996        | 0.999         | 0.994         | 1.008         | Q93009       | USP7      | Ubiquitin carboxyl-terminal hydrolase 7                  |
| 1.064           | 0.998        | 1.014        | 0.973        | 0.954        | 0.982        | 1.004        | 1.040        | 0.998        | 1.012         | 1.038         | 1.041         | P40818       | USP8      | Ubiquitin carboxyl-terminal hydrolase 8                  |
| 0.994           | 0.981        | 1.004        | 0.995        | 0.935        | 1.047        | 1.011        | 1.051        | 1.043        | 1.020         | 0.967         | 1.040         | Q92560       | BAP1      | Ubiquitin carboxyl-terminal hydrolase BAP1               |
| 1.048           | 0.976        | 0.936        | 1.061        | 1.029        | 1.069        | 1.099        | 0.909        | 1.198        | 0.953         | 0.982         | 1.063         | Q9NQC7       | CYLD      | Ubiquitin carboxyl-terminal hydrolase CYLD               |
| 1.022           | 0.979        | 1.002        | 1.015        | 0.948        | 1.012        | 0.967        | 1.029        | 0.997        | 1.008         | 0.986         | 1.010         | P15374       | UCHL3     | Ubiquitin carboxyl-terminal hydrolase isozyme L3         |
| 1.007           | 1.058        | 1.088        | 1.032        | 1.002        | 1.017        | 1.090        | 1.067        | 1.018        | 1.049         | 0.988         | 1.098         | Q9H8M7       | MINDY3    | Ubiquitin carboxyl-terminal hydrolase MINDY-3            |
| 1.002           | 1.001        | 1.013        | 1.023        | 0.992        | 1.017        | 0.997        | 1.029        | 0.999        | 0.942         | 0.994         | 0.954         | Q5LJA5       | UCHL5     | Ubiquitin carboxyl-terminal hydrolase                    |
| 0.996           | 1.026        | 1.045        | 1.037        | 0.907        | 1.005        | 0.959        | 1.101        | 1.035        | 0.942         | 1.007         | 1.032         | Q8WUN7       | UBTD2     | Ubiquitin domain-containing protein 2                    |
| 0.989           | 0.993        | 0.989        | 0.983        | 0.942        | 1.016        | 1.064        | 1.036        | 0.996        | 0.963         | 0.975         | 0.990         | O14562       | UBFD1     | Ubiquitin domain-containing protein UBFD1                |
| 1.048           | 1.004        | 1.012        | 1.020        | 0.985        | 0.976        | 0.995        | 1.026        | 0.987        | 1.012         | 0.998         | 0.964         | J3KR44       | OTUB1     | Ubiquitin thioesterase                                   |
|                 |              |              |              |              |              | 0.957        | 1.039        | 1.276        |               |               |               | Q5VVQ6       | YOD1      | Ubiquitin thioesterase OTU1                              |
| 1.034           | 0.963        | 1.008        | 0.838        | 0.982        | 1.163        | 1.211        | 1.404        | 1.269        |               |               |               | Q96DC9       | OTUB2     | Ubiquitin thioesterase OTUB2                             |
| 0.954           | 0.984        | 0.998        | 0.998        | 0.971        | 1.010        | 1.025        | 0.987        | 0.967        | 1.007         | 0.994         | 1.034         | Q96BN8       | OTULIN    | Ubiquitin thioesterase otulin                            |
| 1.018           | 1.042        | 0.971        | 1.012        | 0.924        | 0.957        | 1.004        | 1.063        | 0.961        | 1.001         | 0.958         | 1.060         | O14933       | UBE2L6    | Ubiquitin/ISG15-conjugating enzyme E2 L6                 |
| 1.036           | 0.988        | 0.975        | 1.033        | 1.010        | 1.002        | 1.057        | 0.976        | 0.985        | 1.017         | 0.991         | 0.967         | P62979       | RPS27A    | Ubiquitin-40S ribosomal protein S27a                     |
| 1.417           | 1.042        | 1.136        | 1.068        | 2.605        | 0.789        | 1.219        | 0.497        | 1.100        | 1.057         | 0.795         | 1.041         | P62987       | UBA52     | Ubiquitin-60S ribosomal protein L40                      |
| 1.030           | 1.049        | 1.013        | 1.060        | 1.053        | 0.973        | 1.047        | 0.986        | 1.033        | 1.061         | 1.007         | 1.038         | Q8TF42       | UBASH3B   | Ubiquitin-associated and SH3 domain-containing protein B |
| 0.973           | 0.953        | 1.026        | 0.976        | 0.986        | 1.067        | 0.989        | 1.097        | 0.993        | 0.905         | 1.004         | 1.040         | Q9BSL1       | UBAC1     | Ubiquitin-associated domain-containing protein 1         |
| 1.062           | 1.022        | 0.947        | 1.039        | 0.957        | 0.975        | 1.045        | 1.080        | 1.042        | 1.165         | 1.129         | 1.030         | Q8NBM4       | UBAC2     | Ubiquitin-associated domain-containing protein 2         |
| 0.956           | 1.006        | 0.993        | 1.002        | 1.000        | 1.032        | 1.027        | 1.084        | 0.997        | 1.056         | 1.050         | 1.101         | Q5T6F2       | UBAP2     | Ubiquitin-associated protein 2                           |
| 1.034           | 1.037        | 1.036        | 1.018        | 1.008        | 0.938        | 1.081        | 1.174        | 0.975        | 0.993         | 0.994         | 1.073         | P49459       | UBE2A     | Ubiquitin-conjugating enzyme E2 A                        |
|                 |              |              | 1.121        | 0.988        | 0.963        | 1.029        | 1.102        | 1.222        | 1.099         | 0.976         | 0.997         | P63146       | UBE2B     | Ubiquitin-conjugating enzyme E2 B                        |
| 0.961           | 1.009        | 0.975        | 0.998        | 0.893        | 0.985        | 1.058        | 1.128        | 1.054        | 0.919         | 0.897         | 1.048         | O00762       | UBE2C     | Ubiquitin-conjugating enzyme E2 C                        |
| 1.015           | 0.994        | 0.959        | 0.992        | 0.978        | 0.946        | 1.015        | 1.108        | 0.986        | 0.986         | 1.091         | 1.013         | P51668       | UBE2D1    | Ubiquitin-conjugating enzyme E2 D1                       |
| 1.032           | 1.004        | 0.903        | 0.989        | 1.020        | 0.954        | 0.996        | 1.108        | 0.973        | 0.969         | 1.004         | 0.972         | A0A0A0MQU3   | UBE2D2    | Ubiquitin-conjugating enzyme E2 D2                       |
| 1.050           | 1.018        | 1.002        | 1.021        | 0.945        | 1.015        | 1.042        | 1.033        | 0.998        | 1.024         | 0.946         | 0.978         | P51965       | UBE2E1    | Ubiquitin-conjugating enzyme E2 E1                       |
| 0.553           | 0.978        | 1.413        | 0.829        | 1.047        | 1.073        | 1.086        | 0.970        | 0.984        | 1.490         | 1.080         | 1.039         | Q96LR5       | UBE2E2    | Ubiquitin-conjugating enzyme E2 E2                       |
| 0.927           | 0.910        | 1.074        | 0.781        | 1.339        | 1.079        | 0.852        | 0.467        | 0.898        | 1.250         | 1.026         | 1.149         | Q969T4       | UBE2E3    | Ubiquitin-conjugating enzyme E2 E3                       |

| Abundance Ratio |              |              |              |              |              |              |              |              |               |               |               | Accession ID | Gene name | Protein Description                                    |
|-----------------|--------------|--------------|--------------|--------------|--------------|--------------|--------------|--------------|---------------|---------------|---------------|--------------|-----------|--------------------------------------------------------|
| 1 d<br>M1/C1    | 1 d<br>M2/C2 | 1 d<br>M3/C3 | 4 d<br>M1/C1 | 4 d<br>M2/C2 | 4 d<br>M3/C3 | 7 d<br>M1/C1 | 7 d<br>M2/C2 | 7 d<br>M3/C3 | 10 d<br>M1/C1 | 10 d<br>M2/C2 | 10 d<br>M3/C3 |              |           |                                                        |
| 1.012           | 0.999        | 1.001        | 1.026        | 1.004        | 1.034        | 1.012        | 1.051        | 1.020        | 1.018         | 0.973         | 0.982         | P62253       | UBE2G1    | Ubiquitin-conjugating enzyme E2 G1                     |
| 1.035           | 0.988        | 1.073        | 0.978        | 0.986        | 1.016        | 0.979        | 1.077        | 0.949        | 0.977         | 0.955         | 1.065         | P60604       | UBE2G2    | Ubiquitin-conjugating enzyme E2 G2                     |
| 1.038           | 0.978        | 0.970        | 1.032        | 0.937        | 1.002        | 1.026        | 1.111        | 1.033        | 1.072         | 1.007         | 1.160         | P62256       | UBE2H     | Ubiquitin-conjugating enzyme E2 H                      |
| 0.985           | 0.964        | 1.041        | 1.001        | 0.863        | 0.976        | 0.923        | 0.710        | 0.944        | 1.007         | 0.949         | 1.175         | Q9Y385       | UBE2J1    | Ubiquitin-conjugating enzyme E2 J1                     |
| 1.075           | 0.774        | 0.988        | 0.987        | 1.109        | 1.081        |              |              |              | 1.088         | 1.012         | 1.022         | Q8N2K1       | UBE2J2    | Ubiquitin-conjugating enzyme E2 J2                     |
| 1.016           | 0.974        | 0.994        | 1.011        | 0.990        | 0.999        | 1.009        | 1.073        | 1.002        | 0.970         | 0.981         | 1.019         | P61086       | UBE2K     | Ubiquitin-conjugating enzyme E2 K                      |
| 1.048           | 1.012        | 0.972        | 1.012        | 0.999        | 0.985        | 0.992        | 1.091        | 1.010        | 1.005         | 1.012         | 0.978         | P68036       | UBE2L3    | Ubiquitin-conjugating enzyme E2 L3                     |
| 1.012           | 1.010        | 1.015        | 1.003        | 1.070        | 0.997        | 1.015        | 0.986        | 1.048        | 0.983         | 1.022         | 0.984         | P61088       | UBE2N     | Ubiquitin-conjugating enzyme E2 N                      |
| 1.007           | 0.996        | 1.012        | 1.011        | 0.982        | 1.093        | 0.997        | 0.978        | 1.032        | 1.007         | 1.057         | 1.056         | Q7Z7E8       | UBE2Q1    | Ubiquitin-conjugating enzyme E2 Q1                     |
| 1.008           | 1.016        | 1.004        | 1.008        | 0.949        | 1.041        | 1.028        | 1.097        | 1.025        | 0.984         | 0.988         | 1.058         | P49427       | CDC34     | Ubiquitin-conjugating enzyme E2 R1                     |
| 0.998           | 0.981        | 0.981        | 1.001        | 0.923        | 0.952        | 0.976        | 1.170        | 0.948        | 1.018         | 0.978         | 1.026         | Q712K3       | UBE2R2    | Ubiquitin-conjugating enzyme E2 R2                     |
| 0.958           | 1.064        | 1.008        | 1.118        | 1.000        | 1.069        | 1.082        | 1.159        | 1.073        | 0.907         | 0.970         | 1.064         | Q16763       | UBE2S     | Ubiquitin-conjugating enzyme E2 S                      |
| 1.044           | 0.938        | 1.050        | 0.975        | 1.041        | 0.970        | 1.090        | 0.977        | 1.008        |               |               |               | Q9NPD8       | UBE2T     | Ubiquitin-conjugating enzyme E2 T                      |
| 1.031           | 0.969        | 1.027        | 1.012        | 0.970        | 0.994        | 1.053        | 1.014        | 1.019        | 1.051         | 1.004         | 1.004         | Q15819       | UBE2V2    | Ubiquitin-conjugating enzyme E2 variant 2              |
| 1.056           | 1.015        | 1.010        | 0.985        | 0.927        | 0.945        | 1.029        | 1.169        | 1.016        | 0.979         | 0.965         | 1.061         | Q8IX04       | UEVLD     | Ubiquitin-conjugating enzyme E2 variant 3              |
| 1.013           | 1.020        | 0.998        | 1.011        | 1.132        | 0.947        | 1.069        | 1.017        | 1.036        | 0.957         | 0.994         | 0.985         | Q9H832       | UBE2Z     | Ubiquitin-conjugating enzyme E2 Z                      |
| 1.015           | 0.992        | 1.012        | 0.970        | 0.993        | 0.982        | 0.914        | 1.006        | 0.988        | 0.926         | 1.017         | 0.940         | P61960       | UFM1      | Ubiquitin-fold modifier 1                              |
| 1.014           | 0.981        | 1.003        | 1.009        | 1.064        | 1.034        | 1.074        | 1.008        | 1.040        | 1.018         | 1.026         | 1.019         | Q9Y3C8       | UFC1      | Ubiquitin-fold modifier-conjugating enzyme 1           |
| 1.004           | 0.999        | 1.004        | 1.005        | 0.951        | 1.024        | 1.034        | 1.016        | 1.031        | 1.017         | 1.019         | 1.022         | Q8WVY7       | UBLCP1    | Ubiquitin-like domain-containing CTD phosphatase 1     |
|                 |              |              |              |              |              |              |              |              | 1.243         | 1.084         | 1.288         | Q5JRS2       | UBA1      | Ubiquitin-like modifier-activating enzyme 1 (Fragment) |
| 0.973           | 0.964        | 0.971        | 1.047        | 0.934        | 1.110        | 1.004        | 0.901        | 1.103        | 1.043         | 1.004         | 1.053         | Q5JRS3       | UBA1      | Ubiquitin-like modifier-activating enzyme 1 (Fragment) |
| 1.008           | 1.008        | 0.998        | 0.994        | 1.035        | 0.988        | 0.972        | 1.015        | 1.007        | 0.956         | 0.984         | 0.954         | P22314       | UBA1      | Ubiquitin-like modifier-activating enzyme 1            |
| 1.051           | 0.997        | 1.046        | 1.027        | 0.930        | 1.014        | 0.974        | 1.037        | 1.013        | 1.003         | 1.043         | 0.996         | Q9GZZ9       | UBA5      | Ubiquitin-like modifier-activating enzyme 5            |
| 1.004           | 1.010        | 0.997        | 1.005        | 1.024        | 1.004        | 0.999        | 1.052        | 1.029        | 0.995         | 1.008         | 1.011         | A0AVT1       | UBA6      | Ubiquitin-like modifier-activating enzyme 6            |
| 0.947           | 1.006        | 1.145        | 0.986        | 1.020        | 1.082        |              |              |              | 1.028         | 0.935         | 1.088         | P41226       | UBA7      | Ubiquitin-like modifier-activating enzyme 7            |
| 0.997           | 1.002        | 1.022        | 1.023        | 1.041        | 1.074        | 1.003        | 1.095        | 1.054        | 0.967         | 0.986         | 1.008         | O95352       | ATG7      | Ubiquitin-like modifier-activating enzyme ATG7         |
|                 |              |              |              |              |              | 1.002        | 1.241        | 1.000        |               |               |               | O95164       | UBL3      | Ubiquitin-like protein 3                               |
| 1.019           | 1.014        | 1.042        | 1.013        | 0.972        | 1.002        | 1.059        | 1.082        | 1.029        | 0.993         | 1.047         | 1.072         | P11441       | UBL4A     | Ubiquitin-like protein 4A                              |
| 1.141           | 1.001        | 1.047        | 1.065        | 1.190        | 1.004        | 0.966        | 0.904        | 1.010        | 0.896         | 0.979         | 0.883         | Q9BZL1       | UBL5      | Ubiquitin-like protein 5                               |
| 1.021           | 0.980        | 1.057        | 0.958        | 0.932        | 0.950        | 1.075        | 1.007        | 0.994        | 1.034         | 1.035         | 0.897         | Q96S82       | UBL7      | Ubiquitin-like protein 7                               |
| 1.027           | 1.006        | 0.977        | 0.992        | 0.968        | 1.031        | 0.959        | 1.094        | 0.993        | 0.911         | 0.966         | 0.956         | O94817       | ATG12     | Ubiquitin-like protein ATG12                           |
| 1.016           | 1.039        | 0.972        | 0.994        | 1.003        | 1.012        | 1.026        | 1.080        | 0.961        | 1.004         | 0.978         | 1.050         | P05161       | ISG15     | Ubiquitin-like protein ISG15                           |

| Abundance Ratio |              |              |              |              |              |              |              |              |               |               |               | Accession ID | Gene name | Protein Description                                                               |
|-----------------|--------------|--------------|--------------|--------------|--------------|--------------|--------------|--------------|---------------|---------------|---------------|--------------|-----------|-----------------------------------------------------------------------------------|
| 1 d<br>M1/C1    | 1 d<br>M2/C2 | 1 d<br>M3/C3 | 4 d<br>M1/C1 | 4 d<br>M2/C2 | 4 d<br>M3/C3 | 7 d<br>M1/C1 | 7 d<br>M2/C2 | 7 d<br>M3/C3 | 10 d<br>M1/C1 | 10 d<br>M2/C2 | 10 d<br>M3/C3 |              |           |                                                                                   |
| 1.011           | 1.107        | 0.988        | 1.101        | 0.858        | 0.971        | 0.957        | 0.878        | 1.025        | 0.808         | 0.735         | 0.953         | Q9H0Y0       | ATG10     | Ubiquitin-like-conjugating enzyme ATG10                                           |
| 1.025           | 1.003        | 1.016        | 0.999        | 0.980        | 1.033        | 1.031        | 1.049        | 1.022        | 1.039         | 0.974         | 1.025         | Q9NT62       | ATG3      | Ubiquitin-like-conjugating enzyme ATG3                                            |
| 1.008           | 1.002        | 1.010        | 1.031        | 0.980        | 1.004        | 1.008        | 1.005        | 1.008        | 0.968         | 1.004         | 0.998         | Q05086       | UBE3A     | Ubiquitin-protein ligase E3A                                                      |
| 1.094           | 1.029        | 1.097        | 1.169        | 1.028        | 0.997        | 1.111        | 1.067        | 1.005        | 0.970         | 1.016         | 1.041         | Q7Z3V4       | UBE3B     | Ubiquitin-protein ligase E3B                                                      |
| 1.001           | 1.014        | 1.032        | 0.995        | 0.986        | 1.027        | 1.005        | 1.061        | 1.048        | 0.961         | 0.976         | 0.989         | Q15386       | UBE3C     | Ubiquitin-protein ligase E3C                                                      |
| 0.990           | 1.004        | 1.022        | 0.976        | 0.993        | 1.056        | 1.017        | 0.992        | 1.022        | 1.044         | 1.045         | 1.046         | Q04323       | UBXN1     | UBX domain-containing protein 1                                                   |
| 1.042           | 1.177        | 1.026        |              |              |              | 0.901        | 1.290        | 0.997        | 0.898         | 1.115         | 1.231         | P68543       | UBXN2A    | UBX domain-containing protein 2A                                                  |
| 0.903           | 1.038        | 1.020        | 0.897        | 0.981        | 0.998        | 1.006        | 1.048        | 1.010        |               |               |               | Q14CS0       | UBXN2B    | UBX domain-containing protein 2B                                                  |
| 1.021           | 0.994        | 1.037        | 0.987        | 0.859        | 0.974        | 0.944        | 0.965        | 0.977        | 0.946         | 0.965         | 0.965         | Q92575       | UBXN4     | UBX domain-containing protein 4                                                   |
| 1.003           | 0.999        | 0.997        | 1.025        | 1.002        | 1.039        | 1.024        | 1.082        | 1.062        | 1.072         | 1.024         | 1.033         | Q9BZV1       | UBXN6     | UBX domain-containing protein 6                                                   |
| 1.008           | 0.968        | 0.988        | 1.009        | 0.979        | 1.036        | 0.997        | 1.071        | 1.064        | 0.941         | 1.007         | 1.017         | O94888       | UBXN7     | UBX domain-containing protein 7                                                   |
| 1.025           | 1.151        | 1.132        | 1.061        | 1.082        | 0.911        | 1.263        | 1.007        | 0.828        | 1.119         | 1.050         | 1.019         | Q67FW5       | B3GNTL1   | UDP-GlcNAc:betaGal beta-1,3-N-acetylglucosaminyltransferase-like protein 1        |
| 0.993           | 0.988        | 0.979        | 1.014        | 1.013        | 1.000        | 1.005        | 0.917        | 0.969        | 0.995         | 0.977         | 1.043         | Q14376       | GALE      | UDP-glucose 4-epimerase                                                           |
| 1.020           | 1.001        | 1.011        | 1.041        | 1.064        | 1.050        | 1.006        | 1.003        | 1.056        | 1.045         | 1.016         | 0.997         | O60701       | UGDH      | UDP-glucose 6-dehydrogenase                                                       |
| 0.979           | 0.996        | 1.006        | 0.994        | 0.991        | 1.002        | 0.990        | 1.036        | 0.998        | 0.980         | 0.973         | 0.987         | Q9NYU2       | UGGT1     | UDP-glucose:glycoprotein glucosyltransferase 1                                    |
| 1.023           | 1.013        | 1.087        | 1.017        | 0.989        | 0.958        | 1.004        | 1.085        | 1.085        | 0.958         | 1.001         | 1.057         | Q9NYU1       | UGGT2     | UDP-glucose:glycoprotein glucosyltransferase 2                                    |
|                 |              |              | 1.426        | 0.651        | 0.657        | 1.206        | 0.821        | 0.545        |               |               |               | Q9NTN3       | SLC35D1   | UDP-glucuronic acid/UDP-N-acetylgalactosamine transporter                         |
| 0.989           | 1.016        | 1.161        | 0.917        | 0.780        | 1.063        | 1.089        | 0.813        | 1.032        | 1.210         | 1.013         | 1.099         | Q9H3H5       | DPAGT1    | UDP-N-acetylglucosamine--dolichyl-phosphate N-acetylglucosaminophosphotransferase |
| 0.979           | 0.987        | 1.000        | 0.987        | 0.968        | 0.994        | 1.025        | 1.031        | 1.007        | 0.990         | 0.941         | 1.009         | O15294       | OGT       | UDP-N-acetylglucosamine--peptide N-acetylglucosaminyltransferase 110 kDa subunit  |
| 0.966           | 0.999        | 0.983        | 0.996        | 0.997        | 0.996        | 0.977        | 1.047        | 1.026        | 0.925         | 0.949         | 1.005         | Q16222       | UAP1      | UDP-N-acetylhexosamine pyrophosphorylase                                          |
| 1.011           | 0.988        | 0.991        | 1.002        | 1.048        | 1.058        | 1.004        | 0.943        | 1.043        | 1.052         | 1.048         | 1.038         | Q3KQV9       | UAP1L1    | UDP-N-acetylhexosamine pyrophosphorylase-like protein 1                           |
| 1.139           | 1.258        | 1.656        |              |              |              | 1.107        | 1.225        | 0.925        |               |               |               | Q969S0       | SLC35B4   | UDP-xylose and UDP-N-acetylglucosamine transporter                                |
| 1.008           | 0.959        | 1.016        | 0.989        | 0.991        | 1.026        | 0.983        | 1.060        | 1.030        | 0.955         | 0.977         | 0.958         | Q9NUQ7       | UFSP2     | Ufm1-specific protease 2                                                          |
| 0.961           | 0.975        | 1.064        | 0.938        | 0.945        | 0.968        | 1.041        | 1.043        | 0.999        | 1.061         | 0.995         | 1.071         | Q6BDS2       | UHRF1BP1  | UHRF1-binding protein 1                                                           |
| 0.916           | 0.842        | 1.145        | 1.068        | 0.959        | 1.019        | 1.123        | 1.110        | 1.060        | 1.109         | 1.038         | 1.020         | A0JNW5       | UHRF1BP1L | UHRF1-binding protein 1-like                                                      |
| 1.003           | 1.020        | 0.994        | 1.023        | 0.988        | 1.029        | 0.957        | 1.015        | 0.972        | 1.026         | 1.016         | 1.011         | P30085       | CMPK1     | UMP-CMP kinase                                                                    |
|                 |              |              |              |              |              |              |              |              | 0.962         | 1.042         | 1.041         | Q96GV9       | C5orf30   | UNC119-binding protein C5orf30                                                    |
|                 |              |              | 0.969        | 0.769        | 1.214        | 0.971        | 1.007        | 0.952        |               |               |               | O43934       | MFSD11    | UNC93-like protein MFSD11                                                         |
|                 |              |              |              |              |              | 0.983        | 0.917        | 1.122        |               |               |               | Q86TW2       | ADCK1     | Uncharacterized aarF domain-containing protein kinase 1                           |

| Abundance Ratio |              |              |              |              |              |              |              |              |               |               |               | Accession ID | Gene name | Protein Description                                     |
|-----------------|--------------|--------------|--------------|--------------|--------------|--------------|--------------|--------------|---------------|---------------|---------------|--------------|-----------|---------------------------------------------------------|
| 1 d<br>M1/C1    | 1 d<br>M2/C2 | 1 d<br>M3/C3 | 4 d<br>M1/C1 | 4 d<br>M2/C2 | 4 d<br>M3/C3 | 7 d<br>M1/C1 | 7 d<br>M2/C2 | 7 d<br>M3/C3 | 10 d<br>M1/C1 | 10 d<br>M2/C2 | 10 d<br>M3/C3 |              |           |                                                         |
| 0.890           | 0.891        | 0.996        | 0.958        | 0.901        | 1.061        | 1.052        | 1.070        | 1.082        | 1.162         | 0.754         | 1.000         | Q3MIX3       | ADCK5     | Uncharacterized aarF domain-containing protein kinase 5 |
| 1.030           | 1.102        | 1.076        |              |              |              |              |              |              | 1.054         | 0.920         | 1.390         | Q6NSJ0       | KIAA1161  | Uncharacterized family 31 glucosidase KIAA1161          |
| 1.002           | 0.979        | 1.015        | 0.994        | 0.967        | 1.006        | 0.974        | 0.951        | 0.972        | 1.007         | 0.940         | 0.994         | F8W031       | 1 SV      | Uncharacterized protein (Fragment)                      |
| 0.988           | 0.998        | 0.938        | 0.983        | 0.925        | 0.946        | 0.939        | 1.029        | 0.947        | 0.952         | 0.993         | 0.912         | HOYHG0       | 1 SV      | Uncharacterized protein (Fragment)                      |
| 1.017           | 1.000        | 1.059        | 0.940        | 0.979        | 1.003        | 0.974        | 1.026        | 0.987        | 1.040         | 0.944         | 1.048         | HOYIV9       | 3 SV      | Uncharacterized protein (Fragment)                      |
|                 |              |              |              |              |              |              |              |              | 1.058         | 1.002         | 1.232         | M0R296       | 4 SV      | Uncharacterized protein (Fragment)                      |
| 0.975           | 1.004        | 0.966        | 0.954        | 1.039        | 0.947        | 0.986        | 0.955        | 0.977        | 0.891         | 1.035         | 1.002         | L7N2F9       | 4 SV      | Uncharacterized protein (Fragment)                      |
| 0.957           | 0.983        | 0.971        | 0.888        | 0.877        | 1.069        |              |              |              |               |               |               | HOY3Z8       | 4 SV      | Uncharacterized protein (Fragment)                      |
| 1.080           | 1.012        | 1.048        | 1.004        | 0.947        | 1.065        | 0.971        | 1.040        | 0.915        | 1.022         | 1.030         | 1.051         | H7C0S8       | 4 SV      | Uncharacterized protein (Fragment)                      |
| 0.957           | 1.000        | 0.992        | 0.985        | 0.992        | 0.974        | 1.009        | 0.962        | 0.980        | 0.982         | 0.991         | 1.017         | A0A096LP16   | 4 SV      | Uncharacterized protein (Fragment)                      |
| 0.887           | 0.990        | 0.980        | 0.971        | 1.000        | 1.024        | 0.989        | 0.924        | 1.013        | 0.958         | 1.011         | 0.979         | H3BN98       | 4 SV      | Uncharacterized protein (Fragment)                      |
| 1.120           | 1.213        | 1.066        | 1.060        | 1.207        | 1.218        | 0.938        | 1.227        | 1.223        | 0.858         | 1.034         | 0.999         | Q9H8K7       | C10orf88  | Uncharacterized protein C10orf88                        |
| 1.066           | 0.953        | 1.068        | 0.994        | 1.024        | 1.080        | 1.019        | 1.081        | 1.076        | 0.987         | 1.017         | 1.165         | Q9BUA3       | C11orf84  | Uncharacterized protein C11orf84                        |
| 1.054           | 1.005        | 1.024        | 1.022        | 0.979        | 1.116        | 1.052        | 0.812        | 1.024        | 0.978         | 0.841         | 1.014         | Q8N999       | C12orf29  | Uncharacterized protein C12orf29                        |
| 1.027           | 0.961        | 0.994        | 0.951        | 0.991        | 0.969        | 1.023        | 1.054        | 0.940        | 0.932         | 0.922         | 1.083         | A0A087WT30   | C12orf45  | Uncharacterized protein C12orf45                        |
|                 |              |              | 1.050        | 1.079        | 1.119        | 1.002        | 1.065        | 1.074        | 0.988         | 1.036         | 1.028         | Q69YU5       | C12orf73  | Uncharacterized protein C12orf73                        |
| 0.914           | 0.930        | 0.964        | 0.985        | 1.014        | 1.156        | 0.992        | 0.940        | 1.050        | 0.950         | 0.842         | 1.053         | Q9NWQ9       | C14orf119 | Uncharacterized protein C14orf119                       |
| 0.935           | 0.980        | 1.033        | 0.977        | 0.972        | 1.048        | 0.962        | 0.823        | 0.995        | 1.087         | 0.949         | 1.129         | Q6ZUT6       | C15orf52  | Uncharacterized protein C15orf52                        |
|                 |              |              | 1.104        | 0.849        | 0.984        | 0.796        | 1.061        | 1.126        | 0.884         | 1.089         | 1.270         | A6NNL5       | C15orf61  | Uncharacterized protein C15orf61                        |
|                 |              |              | 0.785        | 0.902        | 1.080        | 0.847        | 1.026        | 0.917        |               |               |               | Q8N3J3       | C17orf53  | Uncharacterized protein C17orf53                        |
| 0.987           | 0.960        | 1.005        | 1.015        | 0.899        | 1.096        | 1.125        | 1.103        | 1.042        | 1.052         | 0.980         | 1.091         | Q9BQA9       | C17orf62  | Uncharacterized protein C17orf62                        |
| 0.985           | 1.018        | 1.067        |              |              |              | 1.036        | 1.021        | 0.903        | 1.035         | 1.046         | 1.022         | Q9BSJ5       | C17orf80  | Uncharacterized protein C17orf80                        |
| 0.995           | 0.984        | 1.016        | 0.950        | 0.923        | 1.031        | 1.000        | 1.133        | 1.035        | 0.994         | 0.987         | 1.032         | Q96DM3       | C18orf8   | Uncharacterized protein C18orf8                         |
| 0.981           | 1.014        | 0.930        | 0.980        | 0.926        | 0.959        | 0.953        | 0.990        | 0.931        | 1.007         | 1.014         | 1.005         | Q9BQ61       | C19orf43  | Uncharacterized protein C19orf43                        |
| 1.022           | 1.013        | 1.084        | 0.996        | 0.912        | 1.072        | 1.147        | 0.951        | 0.952        | 1.008         | 0.977         | 1.092         | Q8N9M1       | C19orf47  | Uncharacterized protein C19orf47                        |
| 1.009           | 0.966        | 1.006        | 1.154        | 1.130        | 1.251        |              |              |              |               |               |               | A0A087WWL5   | C19orf68  | Uncharacterized protein C19orf68                        |
| 0.960           | 0.963        | 1.059        | 0.942        | 0.864        | 0.903        | 0.956        | 1.268        | 0.954        | 0.999         | 0.872         | 1.057         | Q9NX04       | C1orf109  | Uncharacterized protein C1orf109                        |
| 1.034           | 1.134        | 1.018        | 1.129        | 0.959        | 0.986        | 1.009        | 0.842        | 0.945        | 0.957         | 0.915         | 1.077         | Q6ZSJ8       | C1orf122  | Uncharacterized protein C1orf122                        |
| 1.009           | 1.005        | 0.938        | 0.990        | 0.949        | 0.956        | 0.986        | 1.046        | 0.957        | 1.051         | 0.978         | 1.017         | Q8NDD1       | C1orf131  | Uncharacterized protein C1orf131                        |
| 0.982           | 0.935        | 0.959        | 0.938        | 0.930        | 0.975        | 0.921        | 1.057        | 1.035        | 0.977         | 0.988         | 1.011         | Q9H425       | C1orf198  | Uncharacterized protein C1orf198                        |
| 0.995           | 0.867        | 1.029        | 1.117        | 0.930        | 0.988        | 1.007        | 0.891        | 0.947        | 1.041         | 0.871         | 1.039         | Q9BWL3       | C1orf43   | Uncharacterized protein C1orf43                         |
| 0.969           | 0.994        | 0.995        | 1.012        | 1.021        | 1.085        | 0.966        | 1.025        | 0.982        | 0.921         | 1.006         | 0.951         | Q9BV19       | C1orf50   | Uncharacterized protein C1orf50                         |
|                 |              |              | 1.111        | 1.101        | 1.053        |              |              |              |               |               |               | Q8N0U7       | C1orf87   | Uncharacterized protein C1orf87                         |

| Abundance Ratio |              |              |              |              |              |              |              |              |               |               |               | Accession ID | Gene name | Protein Description               |
|-----------------|--------------|--------------|--------------|--------------|--------------|--------------|--------------|--------------|---------------|---------------|---------------|--------------|-----------|-----------------------------------|
| 1 d<br>M1/C1    | 1 d<br>M2/C2 | 1 d<br>M3/C3 | 4 d<br>M1/C1 | 4 d<br>M2/C2 | 4 d<br>M3/C3 | 7 d<br>M1/C1 | 7 d<br>M2/C2 | 7 d<br>M3/C3 | 10 d<br>M1/C1 | 10 d<br>M2/C2 | 10 d<br>M3/C3 |              |           |                                   |
| 1.002           | 0.983        | 1.016        | 0.973        | 0.984        | 1.187        | 1.116        | 0.904        | 0.975        | 1.043         | 0.996         | 1.128         | Q5JPI3       | C3orf38   | Uncharacterized protein C3orf38   |
| 1.195           | 0.947        | 1.037        | 0.944        | 1.012        | 0.958        | 1.155        | 0.915        | 0.847        |               |               |               | Q8N8J7       | C4orf32   | Uncharacterized protein C4orf32   |
|                 |              |              | 1.097        | 1.018        | 0.996        |              |              |              | 1.193         | 1.119         | 1.087         | Q9H6K1       | C6orf106  | Uncharacterized protein C6orf106  |
| 0.868           | 0.914        | 1.023        | 1.099        | 0.953        | 1.043        | 1.094        | 0.884        | 1.049        | 1.201         | 1.044         | 1.098         | A0A0D9SEI0   | C6orf203  | Uncharacterized protein C6orf203  |
| 0.906           | 0.919        | 1.324        | 0.969        | 1.248        | 1.086        |              |              |              | 1.333         | 1.018         | 1.178         | O95873       | C6orf47   | Uncharacterized protein C6orf47   |
| 1.090           | 1.005        | 1.168        | 1.002        | 0.925        | 1.022        | 1.009        | 1.195        | 0.987        | 0.947         | 1.050         | 0.987         | Q96N11       | C7orf26   | Uncharacterized protein C7orf26   |
|                 |              |              | 2.783        | 0.803        | 1.048        |              |              |              |               |               |               | Q8WVR3       | C7orf43   | Uncharacterized protein C7orf43   |
| 0.995           | 0.961        | 1.036        | 0.963        | 1.006        | 1.040        | 1.009        | 1.031        | 1.045        | 0.966         | 1.024         | 1.048         | Q9BRJ6       | C7orf50   | Uncharacterized protein C7orf50   |
| 1.037           | 1.003        | 1.087        | 1.031        | 0.950        | 1.064        | 1.019        | 1.058        | 1.039        | 0.889         | 1.105         | 1.103         | Q8NOT1       | C8orf59   | Uncharacterized protein C8orf59   |
| 0.841           | 0.700        | 1.175        | 0.857        | 0.874        | 1.269        | 1.245        | 1.290        | 1.117        | 0.965         | 1.014         | 1.125         | Q96K31       | C8orf76   | Uncharacterized protein C8orf76   |
| 1.020           | 0.989        | 1.013        | 0.994        | 0.941        | 0.993        | 1.029        | 0.955        | 1.007        | 1.106         | 1.020         | 1.057         | Q9NZ63       | C9orf78   | Uncharacterized protein C9orf78   |
| 1.031           | 0.988        | 1.044        | 0.995        | 1.002        | 1.006        | 1.003        | 1.043        | 1.056        | 1.020         | 1.017         | 1.056         | Q8TB03       | CXorf38   | Uncharacterized protein CXorf38   |
|                 |              |              | 1.124        | 0.797        | 1.041        | 1.098        | 1.018        | 0.948        | 1.010         | 1.004         | 1.097         | O60268       | KIAA0513  | Uncharacterized protein KIAA0513  |
| 1.051           | 1.011        | 1.071        | 1.016        | 0.994        | 1.011        | 1.024        | 1.069        | 1.055        | 0.969         | 1.000         | 1.090         | Q6ICG6       | KIAA0930  | Uncharacterized protein KIAA0930  |
| 0.689           | 0.757        | 0.880        | 1.142        | 1.004        | 1.122        |              |              |              |               |               |               | Q2LD37       | KIAA1109  | Uncharacterized protein KIAA1109  |
| 1.007           | 1.022        | 1.012        | 1.032        | 0.982        | 1.058        | 1.013        | 0.943        | 0.946        | 1.077         | 1.061         | 1.094         | Q96AT1       | KIAA1143  | Uncharacterized protein KIAA1143  |
| 0.873           | 1.202        | 1.183        | 0.988        | 1.020        | 0.924        | 1.067        | 1.146        | 1.155        | 0.995         | 0.985         | 1.052         | Q6ZU35       | KIAA1211  | Uncharacterized protein KIAA1211  |
| 0.959           | 0.942        | 1.084        | 0.933        | 0.923        | 0.931        | 1.004        | 1.012        | 1.004        | 0.835         | 0.836         | 1.016         | Q9HCM1       | KIAA1551  | Uncharacterized protein KIAA1551  |
| 0.987           | 0.983        | 1.074        | 0.966        | 1.006        | 1.046        | 1.015        | 0.880        | 0.936        | 0.959         | 0.978         | 1.063         | Q9BY89       | KIAA1671  | Uncharacterized protein KIAA1671  |
| 0.814           | 1.002        | 1.202        | 0.910        | 0.931        | 0.927        | 0.871        | 0.726        | 1.076        | 0.924         | 0.981         | 1.087         | Q69YL0       | NCBP2-AS2 | Uncharacterized protein NCBP2-AS2 |
| 0.927           | 1.012        | 0.961        | 1.015        | 1.008        | 0.982        | 1.022        | 1.018        | 0.985        | 1.013         | 0.982         | 1.007         | A0A0B4J2A0   | 1 SV      | Uncharacterized protein           |
|                 |              |              |              |              |              |              |              |              | 1.026         | 0.958         | 1.093         | J3KTA2       | 3 SV      | Uncharacterized protein           |
|                 |              |              | 0.998        | 0.818        | 0.858        | 0.904        | 1.123        | 1.272        |               |               |               | E9PBE3       | 4 SV      | Uncharacterized protein           |
| 1.020           | 0.953        | 0.994        | 1.050        | 1.001        | 1.021        | 1.064        | 1.025        | 1.034        | 1.045         | 1.005         | 1.037         | G3V3G9       | 4 SV      | Uncharacterized protein           |
| 1.015           | 1.005        | 1.016        | 1.007        | 0.998        | 0.998        | 1.000        | 0.952        | 0.990        | 1.037         | 1.001         | 1.001         | F5H5P2       | 4 SV      | Uncharacterized protein           |
| 1.006           | 0.975        | 1.028        | 0.962        | 0.986        | 0.981        | 1.000        | 1.176        | 1.024        | 1.001         | 1.052         | 1.027         | E9PCH4       | 4 SV      | Uncharacterized protein           |
| 1.002           | 0.952        | 1.054        | 0.990        | 0.888        | 1.090        | 1.017        | 1.028        | 0.950        | 1.134         | 0.925         | 1.052         | U3KQK5       | 4 SV      | Uncharacterized protein           |
| 0.967           | 0.983        | 0.930        | 0.970        | 1.012        | 1.014        | 0.988        | 1.009        | 0.988        | 0.932         | 1.003         | 0.970         | A0A087WV05   | 4 SV      | Uncharacterized protein           |
| 0.897           | 0.893        | 1.175        | 0.833        | 1.719        | 1.037        |              |              |              |               |               |               | A0A0G2JPF8   | 4 SV      | Uncharacterized protein           |
| 1.015           | 1.013        | 0.973        | 0.963        | 0.967        | 0.999        | 0.972        | 1.039        | 1.016        | 0.963         | 1.014         | 0.973         | H0YC42       | 4 SV      | Uncharacterized protein           |
| 1.011           | 1.018        | 1.032        | 1.038        | 1.006        | 1.039        | 1.038        | 1.064        | 1.020        | 0.981         | 0.963         | 1.023         | O43795       | MYO1B     | Unconventional myosin-Ib          |
| 0.977           | 1.008        | 0.999        | 0.989        | 1.013        | 0.993        | 1.011        | 1.016        | 1.033        | 1.006         | 0.980         | 1.024         | O00159       | MYO1C     | Unconventional myosin-Ic          |
| 1.042           | 1.009        | 1.030        | 0.988        | 0.996        | 0.992        | 0.988        | 1.082        | 1.040        | 0.996         | 0.971         | 1.037         | O94832       | MYO1D     | Unconventional myosin-Id          |
| 0.963           | 0.985        | 0.986        | 0.959        | 0.981        | 0.991        | 0.990        | 1.046        | 1.009        | 1.002         | 0.974         | 1.023         | Q12965       | MYO1E     | Unconventional myosin-Ie          |

| Abundance Ratio |              |              |              |              |              |              |              |              |               |               |               | Accession ID | Gene name | Protein Description                             |
|-----------------|--------------|--------------|--------------|--------------|--------------|--------------|--------------|--------------|---------------|---------------|---------------|--------------|-----------|-------------------------------------------------|
| 1 d<br>M1/C1    | 1 d<br>M2/C2 | 1 d<br>M3/C3 | 4 d<br>M1/C1 | 4 d<br>M2/C2 | 4 d<br>M3/C3 | 7 d<br>M1/C1 | 7 d<br>M2/C2 | 7 d<br>M3/C3 | 10 d<br>M1/C1 | 10 d<br>M2/C2 | 10 d<br>M3/C3 |              |           |                                                 |
| 1.021           | 1.022        | 1.018        | 1.008        | 0.986        | 0.977        | 1.037        | 1.066        | 1.019        | 1.012         | 0.972         | 1.036         | M0R0P8       | MYO9B     | Unconventional myosin-IXb                       |
| 0.977           | 0.995        | 1.018        | 0.986        | 0.942        | 1.037        | 0.996        | 0.988        | 1.006        | 1.022         | 1.003         | 1.063         | Q9Y4I1       | MYO5A     | Unconventional myosin-Va                        |
| 0.953           | 1.096        | 1.168        | 0.911        | 0.877        | 0.955        | 0.989        | 0.936        | 1.023        | 1.011         | 0.974         | 1.052         | Q9ULV0       | MYO5B     | Unconventional myosin-Vb                        |
| 0.993           | 0.999        | 1.007        | 0.990        | 0.974        | 1.007        | 0.986        | 1.020        | 0.986        | 0.973         | 0.984         | 1.000         | A0A0A0MRM8   | MYO6      | Unconventional myosin-VI                        |
| 0.997           | 0.981        | 1.024        | 0.985        | 0.932        | 0.995        | 0.926        | 0.774        | 0.986        | 0.834         | 0.905         | 0.932         | A0A0A0MQX1   | MYO10     | Unconventional myosin-X                         |
| 1.065           | 1.033        | 1.024        | 0.960        | 0.882        | 0.968        | 1.062        | 0.980        | 0.966        | 1.048         | 0.977         | 1.091         | Q96H55       | MYO19     | Unconventional myosin-XIX                       |
| 0.995           | 1.006        | 1.046        | 0.981        | 0.930        | 1.032        | 1.012        | 1.020        | 1.013        | 1.000         | 0.970         | 1.068         | Q92614       | MYO18A    | Unconventional myosin-XVIIIa                    |
| 0.973           | 0.995        | 1.015        | 1.044        | 0.922        | 1.009        | 1.022        | 1.073        | 0.994        | 0.988         | 1.046         | 1.059         | O94763       | UR11      | Unconventional prefoldin RPB5 interactor 1      |
| 0.997           | 1.031        | 0.986        | 1.013        | 0.935        | 1.034        | 1.031        | 1.057        | 1.020        | 0.980         | 1.026         | 1.008         | Q14146       | URB2      | Unhealthy ribosome biogenesis protein 2 homolog |
| 1.013           | 1.010        | 1.004        | 1.022        | 1.020        | 0.996        | 1.005        | 1.058        | 1.023        | 0.980         | 1.019         | 0.978         | Q9HB07       | C12orf10  | UPF0160 protein MYG1, mitochondrial             |
|                 |              |              | 1.023        | 1.041        | 1.108        | 1.040        | 0.806        | 1.135        | 1.020         | 0.982         | 1.101         | Q9BSU1       | C16orf70  | UPF0183 protein C16orf70                        |
| 1.088           | 0.940        | 1.083        | 1.073        | 0.997        | 1.159        | 1.020        | 0.911        | 1.007        | 1.038         | 0.818         | 1.014         | Q9BUW7       | C9orf16   | UPF0184 protein C9orf16                         |
| 0.978           | 1.005        | 0.937        | 1.036        | 0.975        | 0.969        | 1.016        | 1.001        | 0.996        | 0.903         | 0.936         | 1.085         | Q8WUR7       | C15orf40  | UPF0235 protein C15orf40                        |
| 0.993           | 0.968        | 1.003        | 1.007        | 0.934        | 1.043        | 0.999        | 1.001        | 0.958        | 1.038         | 1.082         | 1.056         | Q9H5V9       | CXorf56   | UPF0428 protein CXorf56                         |
| 1.006           | 1.015        | 1.022        | 0.979        | 0.951        | 1.031        | 1.059        | 1.016        | 0.993        | 0.998         | 1.021         | 1.092         | Q9UFG5       | C19orf25  | UPF0449 protein C19orf25                        |
| 1.067           | 1.044        | 1.015        | 1.056        | 0.975        | 1.001        | 0.975        | 0.947        | 0.935        | 1.027         | 1.093         | 0.993         | Q7Z6I8       | C5orf24   | UPF0461 protein C5orf24                         |
| 1.066           | 0.882        | 1.008        | 0.963        | 0.962        | 1.140        | 1.087        | 1.128        | 1.003        |               |               |               | Q8N1A6       | C4orf33   | UPF0462 protein C4orf33                         |
| 1.028           | 1.039        | 1.054        | 0.977        | 0.869        | 0.943        | 0.958        | 1.013        | 0.948        | 1.025         | 1.044         | 1.038         | Q7Z7F0       | KIAA0907  | UPF0469 protein KIAA0907                        |
| 1.018           | 1.006        | 1.010        | 1.004        | 0.976        | 1.066        | 1.004        | 0.922        | 0.997        | 1.042         | 1.051         | 1.124         | Q9H7E9       | C8orf33   | UPF0488 protein C8orf33                         |
| 0.986           | 0.990        | 1.016        | 0.992        | 0.916        | 1.028        | 0.970        | 1.035        | 0.991        | 0.952         | 0.942         | 1.083         | Q49AR2       | C5orf22   | UPF0489 protein C5orf22                         |
| 0.990           | 0.991        | 1.011        | 0.988        | 0.985        | 1.020        | 0.992        | 1.068        | 1.035        | 0.998         | 1.000         | 1.032         | E7EWW0       | C16orf62  | UPF0505 protein C16orf62                        |
| 1.028           | 0.924        | 1.066        | 0.942        | 0.943        | 1.039        |              |              |              |               |               |               | J3KNH0       | C12orf66  | UPF0536 protein C12orf66                        |
| 1.045           | 0.960        | 0.977        | 0.968        | 0.960        | 0.992        | 0.959        | 0.872        | 1.005        | 1.107         | 1.403         | 1.101         | Q3KRA6       | C2orf76   | UPF0538 protein C2orf76                         |
| 0.961           | 0.976        | 0.929        |              |              |              | 1.095        | 0.890        | 1.094        | 1.079         | 0.989         | 1.129         | Q6P5X5       | C22orf39  | UPF0545 protein C22orf39                        |
| 1.051           | 1.053        | 1.079        |              |              |              | 0.903        | 1.042        | 1.037        |               |               |               | Q6PH81       | C16orf87  | UPF0547 protein C16orf87                        |
| 1.006           | 1.001        | 1.024        | 0.996        | 1.035        | 1.033        | 1.008        | 0.993        | 1.062        | 1.014         | 0.975         | 1.024         | Q5T6V5       | C9orf64   | UPF0553 protein C9orf64                         |
| 0.944           | 0.894        | 0.942        | 0.990        | 0.934        | 1.028        | 1.086        | 1.099        | 0.986        | 1.057         | 1.013         | 1.127         | Q8N8R5       | C2orf69   | UPF0565 protein C2orf69                         |
| 1.012           | 0.987        | 1.017        | 0.989        | 0.972        | 1.027        | 1.000        | 1.018        | 1.023        | 0.981         | 0.991         | 0.973         | Q9Y224       | C14orf166 | UPF0568 protein C14orf166                       |
| 0.977           | 0.983        | 0.983        | 0.984        | 0.981        | 0.971        | 1.053        | 0.938        | 0.994        | 1.045         | 1.027         | 1.030         | Q9NWW4       | C1orf123  | UPF0587 protein C1orf123                        |
| 1.045           | 0.993        | 0.999        | 1.012        | 1.215        | 0.967        | 1.024        | 0.888        | 1.031        | 0.982         | 0.975         | 0.989         | Q6P1X6       | C8orf82   | UPF0598 protein C8orf82                         |
| 1.046           | 0.959        | 1.021        | 0.984        | 0.990        | 1.028        | 1.069        | 0.956        | 1.056        | 1.039         | 1.019         | 1.057         | A6NDU8       | C5orf51   | UPF0600 protein C5orf51                         |
| 1.002           | 0.997        | 1.032        | 1.022        | 0.905        | 0.976        | 0.997        | 1.080        | 1.037        | 0.981         | 0.956         | 1.004         | Q5T2E6       | C10orf76  | UPF0668 protein C10orf76                        |
| 0.922           | 0.942        | 1.107        | 1.060        | 0.967        | 0.812        | 0.899        | 0.910        | 1.038        | 0.866         | 1.118         | 0.911         | Q7Z4R8       | C6orf120  | UPF0669 protein C6orf120                        |

| Abundance Ratio |              |              |              |              |              |              |              |              |               |               |               | Accession ID | Gene name | Protein Description                                            |
|-----------------|--------------|--------------|--------------|--------------|--------------|--------------|--------------|--------------|---------------|---------------|---------------|--------------|-----------|----------------------------------------------------------------|
| 1 d<br>M1/C1    | 1 d<br>M2/C2 | 1 d<br>M3/C3 | 4 d<br>M1/C1 | 4 d<br>M2/C2 | 4 d<br>M3/C3 | 7 d<br>M1/C1 | 7 d<br>M2/C2 | 7 d<br>M3/C3 | 10 d<br>M1/C1 | 10 d<br>M2/C2 | 10 d<br>M3/C3 |              |           |                                                                |
| 0.963           | 0.892        | 0.916        | 0.853        | 0.814        | 1.017        | 0.986        | 0.930        | 1.031        | 0.990         | 0.939         | 1.035         | Q8IYL3       | C1orf174  | UPF0688 protein C1orf174                                       |
| 1.103           | 1.062        | 1.069        | 1.118        | 1.035        | 0.888        | 0.925        | 1.117        | 0.949        | 1.031         | 0.986         | 1.010         | Q8N6N3       | C1orf52   | UPF0690 protein C1orf52                                        |
|                 |              |              | 1.018        | 1.092        | 1.125        | 0.959        | 0.792        | 1.003        | 1.039         | 0.724         | 1.033         | Q32NC0       | C18orf21  | UPF0711 protein C18orf21                                       |
| 0.843           | 0.928        | 0.977        | 0.970        | 0.890        | 1.058        | 0.934        | 0.732        | 0.892        | 0.985         | 0.943         | 1.039         | Q8TCD1       | C18orf32  | UPF0729 protein C18orf32                                       |
| 0.961           | 0.941        | 0.964        | 0.993        | 0.943        | 1.036        | 0.994        | 1.039        | 1.052        | 1.023         | 1.019         | 1.060         | P57076       | C21orf59  | UPF0769 protein C21orf59                                       |
| 0.989           | 1.038        | 0.937        | 0.955        | 0.957        | 0.984        | 1.064        | 1.062        | 0.967        | 1.147         | 1.047         | 0.951         | Q96IX5       | USMG5     | Up-regulated during skeletal muscle growth protein 5           |
| 0.977           | 1.083        | 1.048        | 0.972        | 0.974        | 1.015        | 1.049        | 1.157        | 1.007        | 1.066         | 0.911         | 0.875         | Q8TCY9       | URGCP     | Up-regulator of cell proliferation                             |
| 1.150           | 0.939        | 1.485        |              |              |              |              |              |              |               |               |               | P22415       | USF1      | Upstream stimulatory factor 1                                  |
| 1.040           | 0.942        | 1.021        | 0.984        | 0.984        | 0.997        | 0.878        | 0.868        | 0.993        | 1.007         | 1.056         | 0.987         | Q15853       | USF2      | Upstream stimulatory factor 2                                  |
| 1.060           | 1.036        | 1.119        | 0.994        | 0.937        | 0.949        | 0.939        | 1.074        | 0.962        | 0.928         | 0.943         | 1.052         | Q9NZI7       | UBP1      | Upstream-binding protein 1                                     |
| 1.070           | 0.910        | 1.010        | 0.948        | 0.900        | 0.760        | 1.018        | 1.208        | 0.897        |               |               |               | Q96BW1       | UPRT      | Uracil phosphoribosyltransferase homolog                       |
| 0.977           | 1.065        | 1.052        | 0.991        | 0.952        | 1.009        | 0.997        | 0.967        | 0.957        | 0.907         | 1.007         | 1.053         | P13051       | UNG       | Uracil-DNA glycosylase                                         |
| 0.981           | 0.985        | 0.991        | 1.018        | 0.971        | 1.017        | 1.008        | 1.022        | 1.029        | 0.980         | 0.983         | 1.025         | P11172       | UMPS      | Uridine 5'-monophosphate synthase                              |
| 1.098           | 1.093        | 0.993        | 0.990        | 0.999        | 0.932        | 0.957        | 1.100        | 1.010        | 0.993         | 1.013         | 0.993         | O95848       | NUDT14    | Uridine diphosphate glucose pyrophosphatase                    |
| 1.089           | 1.032        | 1.014        | 1.037        | 1.099        | 1.026        | 1.032        | 1.062        | 1.011        | 0.973         | 1.034         | 0.992         | Q16831       | UPP1      | Uridine phosphorylase 1                                        |
| 0.996           | 1.007        | 1.051        | 1.003        | 0.934        | 0.982        | 1.027        | 1.065        | 1.006        | 1.035         | 0.998         | 1.020         | Q9BZX2       | UCK2      | Uridine-cytidine kinase 2                                      |
| 0.984           | 0.961        | 1.027        | 0.982        | 0.866        | 0.885        | 0.953        | 1.135        | 1.041        | 0.941         | 1.095         | 1.089         | Q9NWX5       | UCKL1     | Uridine-cytidine kinase-like 1                                 |
| 0.763           | 1.023        | 0.852        | 1.144        | 1.065        | 1.333        | 1.249        | 1.102        | 1.280        | 0.937         | 0.990         | 1.074         | Q03405       | PLAUR     | Urokinase plasminogen activator surface receptor               |
| 0.989           | 0.933        | 0.995        | 0.952        | 0.937        | 0.992        | 1.064        | 0.945        | 0.944        | 1.019         | 1.000         | 1.001         | E7ET40       | PLAU      | Urokinase-type plasminogen activator                           |
| 1.044           | 1.046        | 1.046        | 1.026        | 1.065        | 0.993        | 1.045        | 1.015        | 1.029        | 1.001         | 1.022         | 1.039         | P06132       | UROD      | Uroporphyrinogen decarboxylase                                 |
| 1.023           | 0.975        | 0.997        | 0.957        | 1.009        | 0.925        | 1.000        | 1.079        | 1.070        | 1.019         | 1.064         | 1.109         | P10746       | UROS      | Uroporphyrinogen-III synthase                                  |
| 1.044           | 1.160        | 1.207        | 1.089        | 0.912        | 1.095        | 0.779        | 0.831        | 1.011        | 0.811         | 0.786         | 1.410         | X6RAB3       | USP6NL    | USP6 N-terminal-like protein                                   |
| 1.034           | 1.004        | 1.012        | 0.997        | 0.993        | 0.994        | 0.995        | 1.047        | 1.008        | 0.995         | 0.973         | 1.015         | Q16851       | UGP2      | UTP--glucose-1-phosphate uridylyltransferase                   |
| 0.969           | 0.980        | 0.990        | 0.987        | 0.968        | 0.982        | 1.016        | 0.972        | 1.002        | 1.021         | 0.993         | 1.044         | P46939       | UTRN      | Utrophin                                                       |
| 0.929           | 1.080        | 0.987        | 0.980        | 0.989        | 0.994        | 0.959        | 1.022        | 0.999        | 1.058         | 1.051         | 1.008         | P54725       | RAD23A    | UV excision repair protein RAD23 homolog A                     |
| 1.030           | 0.999        | 1.008        | 0.978        | 1.003        | 1.025        | 0.981        | 0.994        | 1.002        | 0.950         | 0.991         | 0.959         | P54727       | RAD23B    | UV excision repair protein RAD23 homolog B                     |
| 1.053           | 1.007        | 1.013        | 0.973        | 0.997        | 1.041        | 1.004        | 1.007        | 1.038        | 0.974         | 0.975         | 1.055         | Q9P2Y5       | UVRAG     | UV radiation resistance-associated gene protein                |
| 1.014           | 1.032        | 1.023        | 1.023        | 0.974        | 1.011        | 1.037        | 1.029        | 1.052        | 1.001         | 0.987         | 1.083         | Q9BZF9       | UACA      | Uveal autoantigen with coiled-coil domains and ankyrin repeats |
| 0.989           | 0.971        | 1.006        | 0.980        | 0.923        | 1.006        | 1.037        | 1.150        | 1.064        | 1.114         | 1.071         | 1.140         | Q3ZAA7       | VMA21     | Vacuolar ATPase assembly integral membrane protein VMA21       |
| 1.001           | 1.030        | 0.985        | 0.988        | 0.915        | 0.983        | 1.031        | 1.096        | 1.027        | 1.036         | 0.995         | 1.011         | P86790       | CCZ1B     | Vacuolar fusion protein CCZ1 homolog B                         |
| 1.028           | 1.013        | 1.002        | 0.970        | 0.917        | 1.013        | 1.015        | 0.983        | 0.994        | 0.935         | 0.918         | 1.061         | Q7L1V2       | MON1B     | Vacuolar fusion protein MON1 homolog B                         |



| Abundance Ratio |              |              |              |              |              |              |              |              |               |               |               | Accession ID | Gene name | Protein Description                                      |
|-----------------|--------------|--------------|--------------|--------------|--------------|--------------|--------------|--------------|---------------|---------------|---------------|--------------|-----------|----------------------------------------------------------|
| 1 d<br>M1/C1    | 1 d<br>M2/C2 | 1 d<br>M3/C3 | 4 d<br>M1/C1 | 4 d<br>M2/C2 | 4 d<br>M3/C3 | 7 d<br>M1/C1 | 7 d<br>M2/C2 | 7 d<br>M3/C3 | 10 d<br>M1/C1 | 10 d<br>M2/C2 | 10 d<br>M3/C3 |              |           |                                                          |
| 1.011           | 0.981        | 0.988        | 1.009        | 1.014        | 1.016        | 1.000        | 1.008        | 1.011        | 1.016         | 0.985         | 1.034         | A0A087WXL6   | VPS11     | Vacuolar protein sorting 11 (Yeast), isoform CRA_a       |
| 1.036           | 0.955        | 1.027        | 1.005        | 0.949        | 0.988        | 1.025        | 1.060        | 0.987        | 1.036         | 0.989         | 1.032         | Q96RL7       | VPS13A    | Vacuolar protein sorting-associated protein 13A          |
| 1.004           | 1.078        | 1.073        | 0.965        | 1.114        | 0.987        |              |              |              |               |               |               | Q7Z7G8       | VPS13B    | Vacuolar protein sorting-associated protein 13B          |
| 0.987           | 1.008        | 1.018        | 1.016        | 0.954        | 1.012        | 1.030        | 1.064        | 1.014        | 1.001         | 0.995         | 1.027         | Q709C8       | VPS13C    | Vacuolar protein sorting-associated protein 13C          |
| 1.103           | 1.038        | 1.019        | 0.991        | 0.963        | 0.997        | 1.003        | 1.078        | 1.034        | 1.024         | 0.974         | 1.046         | Q5THJ4       | VPS13D    | Vacuolar protein sorting-associated protein 13D          |
| 1.022           | 1.008        | 1.040        | 1.005        | 0.929        | 0.979        | 1.000        | 0.982        | 1.028        | 0.998         | 0.947         | 1.037         | Q9H269       | VPS16     | Vacuolar protein sorting-associated protein 16 homolog   |
| 0.977           | 0.998        | 1.000        | 0.988        | 0.974        | 1.038        | 0.993        | 1.034        | 1.014        | 1.038         | 0.994         | 1.070         | Q9P253       | VPS18     | Vacuolar protein sorting-associated protein 18 homolog   |
| 1.006           | 0.995        | 0.991        | 1.004        | 0.950        | 1.018        | 0.990        | 1.022        | 1.008        | 0.999         | 0.984         | 0.992         | O75436       | VPS26A    | Vacuolar protein sorting-associated protein 26A          |
| 1.073           | 1.004        | 1.008        | 1.057        | 0.980        | 1.018        | 1.030        | 1.019        | 1.036        | 1.096         | 1.030         | 1.006         | Q4G0F5       | VPS26B    | Vacuolar protein sorting-associated protein 26B          |
| 0.930           | 0.903        | 1.009        | 1.002        | 0.940        | 1.059        | 1.066        | 1.041        | 0.981        | 0.974         | 0.956         | 0.999         | Q9UK41       | VPS28     | Vacuolar protein sorting-associated protein 28 homolog   |
| 1.036           | 0.998        | 1.030        | 1.004        | 1.078        | 1.003        | 1.029        | 1.001        | 1.011        | 1.029         | 0.966         | 0.992         | F8VXU5       | VPS29     | Vacuolar protein sorting-associated protein 29           |
| 0.887           | 1.063        | 1.277        | 0.867        | 0.929        | 0.998        | 0.965        | 1.091        | 1.096        | 1.005         | 0.894         | 1.044         | Q9UBQ0       | VPS29     | Vacuolar protein sorting-associated protein 29           |
| 1.036           | 0.983        | 1.032        | 0.982        | 0.959        | 0.973        | 1.020        | 1.028        | 1.023        | 0.969         | 0.968         | 0.990         | Q96AX1       | VPS33A    | Vacuolar protein sorting-associated protein 33A          |
| 1.011           | 1.002        | 0.990        | 0.993        | 0.985        | 1.010        | 1.020        | 1.077        | 1.007        | 0.995         | 0.989         | 1.012         | Q9H267       | VPS33B    | Vacuolar protein sorting-associated protein 33B          |
| 1.013           | 1.014        | 1.022        | 0.993        | 1.065        | 0.998        | 0.997        | 1.005        | 1.039        | 0.975         | 0.991         | 1.012         | Q96QK1       | VPS35     | Vacuolar protein sorting-associated protein 35           |
| 0.984           | 1.000        | 0.982        | 0.967        | 0.971        | 0.999        | 0.987        | 1.077        | 1.005        | 0.943         | 0.937         | 0.969         | Q8NEZ2       | VPS37A    | Vacuolar protein sorting-associated protein 37A          |
| 1.095           | 1.006        | 1.029        | 1.094        | 0.999        | 1.073        | 1.071        | 1.099        | 1.077        | 1.065         | 1.036         | 1.050         | Q9H9H4       | VPS37B    | Vacuolar protein sorting-associated protein 37B          |
| 0.979           | 0.885        | 0.987        | 0.981        | 1.044        | 0.998        | 1.015        | 1.013        | 1.108        | 0.960         | 1.002         | 1.084         | A5D8V6       | VPS37C    | Vacuolar protein sorting-associated protein 37C          |
| 1.036           | 1.036        | 1.058        | 1.017        | 0.973        | 1.013        | 1.076        | 1.155        | 1.012        | 1.037         | 1.004         | 0.917         | P49754       | VPS41     | Vacuolar protein sorting-associated protein 41 homolog   |
| 1.029           | 1.016        | 1.011        | 1.047        | 0.973        | 1.038        | 1.024        | 0.995        | 1.044        | 1.018         | 0.982         | 1.021         | Q9NRW7       | VPS45     | Vacuolar protein sorting-associated protein 45           |
| 1.029           | 1.000        | 1.027        | 1.005        | 0.958        | 1.011        | 1.001        | 1.064        | 1.015        | 1.006         | 1.015         | 1.038         | Q9UN37       | VPS4A     | Vacuolar protein sorting-associated protein 4A           |
| 1.017           | 1.016        | 1.005        | 1.003        | 0.952        | 0.974        | 0.991        | 1.051        | 1.000        | 0.989         | 1.008         | 0.990         | O75351       | VPS4B     | Vacuolar protein sorting-associated protein 4B           |
| 1.006           | 0.997        | 1.011        | 1.013        | 1.026        | 1.015        | 1.002        | 1.105        | 1.050        | 0.926         | 1.026         | 0.993         | Q9UID3       | VPS51     | Vacuolar protein sorting-associated protein 51 homolog   |
| 1.021           | 1.011        | 1.015        | 1.015        | 0.975        | 1.030        | 1.002        | 1.028        | 1.063        | 1.003         | 0.991         | 1.038         | Q8N1B4       | VPS52     | Vacuolar protein sorting-associated protein 52 homolog   |
| 1.132           | 1.064        | 1.250        | 0.861        | 1.058        | 1.051        |              |              |              |               |               |               | Q9P1Q0       | VPS54     | Vacuolar protein sorting-associated protein 54           |
| 0.910           | 0.997        | 0.946        | 1.018        | 1.058        | 0.951        | 1.010        | 1.050        | 0.955        | 1.004         | 1.048         | 0.965         | Q9NP79       | VTA1      | Vacuolar protein sorting-associated protein VTA1 homolog |
| 1.071           | 0.997        | 1.021        | 1.021        | 1.001        | 1.018        | 1.018        | 1.094        | 1.027        | 1.001         | 0.999         | 1.018         | Q9BRG1       | VPS25     | Vacuolar protein-sorting-associated protein 25           |
| 0.992           | 0.999        | 1.051        | 1.034        | 0.958        | 1.028        | 1.020        | 0.979        | 1.015        | 1.047         | 1.001         | 1.065         | Q86VN1       | VPS36     | Vacuolar protein-sorting-associated protein 36           |
| 1.019           | 0.978        | 1.006        | 1.039        | 0.931        | 1.042        | 1.027        | 1.003        | 1.002        | 1.060         | 0.990         | 1.063         | Q96H20       | SNF8      | Vacuolar-sorting protein SNF8                            |

| Abundance Ratio |              |              |              |              |              |              |              |              |               |               |               | Accession ID | Gene name | Protein Description                                            |
|-----------------|--------------|--------------|--------------|--------------|--------------|--------------|--------------|--------------|---------------|---------------|---------------|--------------|-----------|----------------------------------------------------------------|
| 1 d<br>M1/C1    | 1 d<br>M2/C2 | 1 d<br>M3/C3 | 4 d<br>M1/C1 | 4 d<br>M2/C2 | 4 d<br>M3/C3 | 7 d<br>M1/C1 | 7 d<br>M2/C2 | 7 d<br>M3/C3 | 10 d<br>M1/C1 | 10 d<br>M2/C2 | 10 d<br>M3/C3 |              |           |                                                                |
| 1.011           | 0.984        | 0.900        | 0.875        | 0.969        | 1.111        | 1.155        | 1.183        | 1.123        | 1.029         | 1.043         | 1.053         | Q96GC9       | VMP1      | Vacuole membrane protein 1                                     |
| 1.021           | 0.975        | 0.981        | 0.986        | 0.972        | 1.017        | 1.002        | 0.935        | 1.071        | 1.028         | 0.963         | 1.004         | Q86WA6       | BPHL      | Valacyclovir hydrolase                                         |
| 0.985           | 0.997        | 1.003        | 0.996        | 1.022        | 1.016        | 1.004        | 1.038        | 1.022        | 1.000         | 1.001         | 1.005         | P26640       | VAR5      | Valine--tRNA ligase                                            |
| 1.011           | 1.027        | 1.034        | 1.026        | 0.988        | 1.003        | 1.031        | 1.096        | 1.058        | 1.024         | 1.011         | 1.054         | A0A0G2JL52   | VAR52     | Valine--tRNA ligase, mitochondrial                             |
| 1.008           | 0.950        | 1.040        | 1.017        | 0.987        | 1.027        | 0.976        | 1.118        | 1.097        | 1.011         | 0.985         | 1.001         | Q96JC1       | VPS39     | Vam6/Vps39-like protein                                        |
| 1.014           | 1.110        | 1.078        | 0.942        | 0.952        | 1.077        | 1.015        | 0.986        | 0.881        |               |               |               | Q8TAA9       | VANGL1    | Vang-like protein 1                                            |
|                 |              |              |              |              |              | 0.860        | 0.845        | 1.045        | 1.055         | 1.031         | 1.051         | J3KPA4       | VEGFA     | Vascular endothelial growth factor A                           |
| 0.983           | 1.039        | 1.012        | 1.069        | 1.013        | 0.978        | 1.105        | 0.787        | 1.076        | 1.015         | 1.041         | 0.971         | Q14119       | VEZF1     | Vascular endothelial zinc finger 1                             |
| 1.025           | 0.990        | 1.025        | 0.982        | 0.960        | 1.004        | 0.941        | 1.005        | 1.004        | 0.911         | 1.001         | 0.927         | P50552       | VASP      | Vasodilator-stimulated phosphoprotein                          |
| 1.064           | 0.979        | 1.066        | 1.028        | 1.086        | 0.984        | 1.062        | 0.824        | 0.996        | 1.000         | 0.993         | 1.063         | P13611       | VCAN      | Versican core protein                                          |
| 0.933           | 0.952        | 0.983        | 1.060        | 1.043        | 1.181        |              |              |              |               |               |               | Q68DQ2       | CRYBG3    | Very large A-kinase anchor protein                             |
| 0.795           | 0.923        | 1.006        | 0.901        | 0.930        | 1.045        | 0.830        | 0.606        | 1.045        | 1.038         | 1.085         | 1.075         | Q6Y1H2       | HACD2     | Very-long-chain (3R)-3-hydroxyacyl-CoA dehydratase 2           |
| 0.950           | 0.998        | 0.985        | 0.966        | 0.900        | 0.978        | 0.999        | 1.113        | 1.001        | 1.041         | 1.024         | 1.011         | Q9P035       | HACD3     | Very-long-chain (3R)-3-hydroxyacyl-CoA dehydratase 3           |
| 1.011           | 0.990        | 1.044        | 1.001        | 0.948        | 1.011        | 1.005        | 1.059        | 0.977        | 0.957         | 1.044         | 0.912         | Q53GQ0       | HSD17B12  | Very-long-chain 3-oxoacyl-CoA reductase                        |
| 0.948           | 0.980        | 0.974        | 0.967        | 0.884        | 1.022        | 1.037        | 0.959        | 0.992        | 1.331         | 1.072         | 1.083         | Q9NZ01       | TECR      | Very-long-chain enoyl-CoA reductase                            |
| 0.958           | 0.996        | 1.038        | 0.977        | 0.962        | 0.997        | 1.054        | 1.081        | 0.993        | 0.982         | 0.950         | 1.175         | Q9Y3E0       | GOLT1B    | Vesicle transport protein GOT1B                                |
| 0.962           | 0.977        | 0.996        | 0.963        | 0.910        | 1.030        | 1.005        | 1.110        | 1.012        | 0.978         | 1.025         | 1.066         | Q12981       | BNIP1     | Vesicle transport protein SEC20                                |
|                 |              |              |              |              |              | 1.056        | 0.761        | 0.898        |               |               |               | Q8WV19       | SFT2D1    | Vesicle transport protein SFT2A                                |
|                 |              |              |              |              |              | 1.107        | 0.880        | 0.931        |               |               |               | O95562       | SFT2D2    | Vesicle transport protein SFT2B                                |
| 0.793           | 0.881        | 1.167        | 0.946        | 0.790        | 1.017        | 0.929        | 1.071        | 0.884        |               |               |               | Q587I9       | SFT2D3    | Vesicle transport protein SFT2C                                |
| 1.012           | 1.025        | 1.091        | 0.978        | 0.907        | 1.015        | 1.013        | 0.966        | 0.933        | 1.051         | 1.053         | 1.075         | Q9NZ43       | USE1      | Vesicle transport protein USE1                                 |
| 1.031           | 0.570        | 1.097        | 0.748        | 1.071        | 1.164        | 0.920        | 0.551        | 0.983        | 1.057         | 1.024         | 1.036         | Q96AJ9       | VTI1A     | Vesicle transport through interaction with t-SNAREs homolog 1A |
| 0.947           | 0.930        | 1.043        | 0.976        | 0.944        | 1.015        | 0.995        | 0.926        | 0.970        | 1.060         | 0.994         | 1.086         | Q9UEU0       | VTI1B     | Vesicle transport through interaction with t-SNAREs homolog 1B |
| 0.893           | 0.888        | 0.999        | 0.969        | 1.013        | 0.993        | 0.969        | 0.955        | 0.997        | 0.995         | 0.993         | 0.948         | Q15836       | VAMP3     | Vesicle-associated membrane protein 3                          |
| 0.863           | 0.994        | 1.152        | 0.920        | 1.056        | 0.865        | 0.954        | 0.964        | 1.136        | 0.884         | 1.073         | 1.174         | O75379       | VAMP4     | Vesicle-associated membrane protein 4                          |
| 0.943           | 0.976        | 1.011        | 1.000        | 0.900        | 1.015        | 1.026        | 1.113        | 1.069        | 1.057         | 1.063         | 1.068         | P51809       | VAMP7     | Vesicle-associated membrane protein 7                          |
| 1.014           | 0.976        | 1.018        | 0.899        | 1.172        | 1.125        | 1.097        | 0.853        | 0.944        | 1.083         | 1.020         | 1.064         | Q9BV40       | VAMP8     | Vesicle-associated membrane protein 8                          |
| 0.869           | 0.973        | 0.941        | 0.972        | 0.896        | 0.983        | 1.004        | 1.004        | 0.953        | 1.005         | 1.028         | 0.971         | Q9P0L0       | VAPA      | Vesicle-associated membrane protein-associated protein A       |
| 0.968           | 1.006        | 0.997        | 0.983        | 0.975        | 0.979        | 0.995        | 1.016        | 0.967        | 1.026         | 1.023         | 1.018         | O95292       | VAPB      | Vesicle-associated membrane protein-associated protein B/C     |
| 0.987           | 1.005        | 1.014        | 0.994        | 1.021        | 0.997        | 0.994        | 1.006        | 1.010        | 0.978         | 0.966         | 1.005         | P46459       | NSF       | Vesicle-fusing ATPase                                          |

| Abundance Ratio |              |              |              |              |              |              |              |              |               |               |               | Accession ID | Gene name | Protein Description                                                          |
|-----------------|--------------|--------------|--------------|--------------|--------------|--------------|--------------|--------------|---------------|---------------|---------------|--------------|-----------|------------------------------------------------------------------------------|
| 1 d<br>M1/C1    | 1 d<br>M2/C2 | 1 d<br>M3/C3 | 4 d<br>M1/C1 | 4 d<br>M2/C2 | 4 d<br>M3/C3 | 7 d<br>M1/C1 | 7 d<br>M2/C2 | 7 d<br>M3/C3 | 10 d<br>M1/C1 | 10 d<br>M2/C2 | 10 d<br>M3/C3 |              |           |                                                                              |
|                 |              |              | 1.030        | 0.951        | 0.872        | 1.191        | 1.021        | 0.976        | 0.990         | 1.064         | 0.861         | Q96IW7       | SEC22A    | Vesicle-trafficking protein SEC22a                                           |
| 0.953           | 1.000        | 0.993        | 0.995        | 0.953        | 0.996        | 1.042        | 1.083        | 0.993        | 1.059         | 1.037         | 1.044         | O75396       | SEC22B    | Vesicle-trafficking protein SEC22b                                           |
| 0.948           | 0.995        | 0.970        | 0.951        | 0.934        | 0.943        | 1.007        | 1.025        | 0.991        | 1.074         | 0.999         | 0.962         | Q12907       | LMAN2     | Vesicular integral-membrane protein VIP36                                    |
| 1.086           | 1.035        | 1.176        | 0.963        | 0.890        | 1.156        | 1.137        | 0.985        | 0.977        | 1.002         | 1.101         | 1.101         | Q9HBM0       | VEZT      | Vezatin                                                                      |
| 1.049           | 1.020        | 1.015        | 1.017        | 0.979        | 1.000        | 0.984        | 0.990        | 0.989        | 0.995         | 0.977         | 0.972         | P08670       | VIM       | Vimentin                                                                     |
| 0.957           | 1.009        | 0.984        | 0.992        | 1.018        | 0.969        | 0.992        | 0.971        | 0.978        | 0.992         | 0.979         | 1.005         | P18206       | VCL       | Vinculin                                                                     |
| 1.018           | 1.028        | 0.980        | 1.000        | 0.916        | 1.009        | 1.029        | 1.032        | 0.981        | 1.084         | 0.966         | 1.054         | O60504       | SORBS3    | Vinexin                                                                      |
| 0.820           | 0.920        | 1.043        | 0.824        | 0.946        | 0.939        | 0.776        | 0.601        | 0.889        | 1.020         | 1.015         | 1.033         | Q9BQB6       | VKORC1    | Vitamin K epoxide reductase complex subunit 1                                |
| 0.883           | 0.948        | 0.921        | 1.014        | 0.850        | 1.026        | 1.042        | 0.952        | 1.107        | 1.105         | 1.054         | 1.026         | Q8N0U8       | VKORC1L1  | Vitamin K epoxide reductase complex subunit 1-like protein 1                 |
| 1.011           | 1.015        | 1.003        | 0.893        | 0.788        | 1.109        | 0.904        | 1.127        | 1.274        | 1.112         | 1.107         | 1.038         | P38435       | GGCX      | Vitamin K-dependent gamma-carboxylase                                        |
|                 |              |              | 0.962        | 0.942        | 0.921        |              |              |              |               |               |               | P07225       | PROS1     | Vitamin K-dependent protein S                                                |
| 1.051           | 1.000        | 1.014        | 1.006        | 1.024        | 0.969        | 0.982        | 0.997        | 0.983        | 0.979         | 1.005         | 0.949         | P21796       | VDAC1     | Voltage-dependent anion-selective channel protein 1                          |
| 1.026           | 1.013        | 0.966        | 0.998        | 1.006        | 0.936        | 0.989        | 1.008        | 1.002        | 1.012         | 1.018         | 0.944         | Q9Y277       | VDAC3     | Voltage-dependent anion-selective channel protein 3                          |
| 0.709           | 1.248        | 1.842        | 0.918        | 1.190        | 1.284        | 0.930        | 1.239        | 1.551        | 1.049         | 0.736         | 1.201         | A0A140LJL2   | CBARP     | Voltage-dependent calcium channel beta subunit-associated regulatory protein |
|                 |              |              | 1.032        | 0.907        | 1.094        |              |              |              |               |               |               | P54289       | CACNA2D1  | Voltage-dependent calcium channel subunit alpha-2/delta-1                    |
| 0.686           | 0.863        | 1.478        | 0.760        | 0.740        | 1.447        | 0.707        | 0.931        | 1.794        | 0.688         | 0.817         | 1.567         | Q8IZS8       | CACNA2D3  | Voltage-dependent calcium channel subunit alpha-2/delta-3                    |
| 1.062           | 0.944        | 1.302        | 0.855        | 0.927        | 1.015        | 0.643        | 0.435        | 0.902        | 1.003         | 1.147         | 1.184         | O60840       | CACNA1F   | Voltage-dependent L-type calcium channel subunit alpha-1F                    |
| 0.971           | 1.015        | 1.013        | 0.918        | 0.989        | 0.964        | 1.013        | 1.075        | 1.027        | 1.049         | 0.823         | 1.140         | P54284       | CACNB3    | Voltage-dependent L-type calcium channel subunit beta-3                      |
| 1.059           | 1.029        | 1.023        | 1.024        | 0.922        | 1.017        | 0.976        | 1.156        | 0.980        | 1.043         | 1.014         | 1.030         | Q8IWT6       | LRRC8A    | Volume-regulated anion channel subunit LRRC8A                                |
| 1.074           | 0.918        | 0.928        | 1.014        | 1.142        | 1.061        | 1.155        | 1.322        | 0.999        |               |               |               | Q6P9F7       | LRRC8B    | Volume-regulated anion channel subunit LRRC8B                                |
| 0.941           | 0.999        | 1.006        | 1.011        | 0.985        | 1.030        | 1.075        | 1.026        | 1.069        | 1.043         | 1.118         | 1.061         | Q8TDW0       | LRRC8C    | Volume-regulated anion channel subunit LRRC8C                                |
| 0.937           | 0.967        | 1.116        | 1.043        | 0.915        | 1.058        |              |              |              | 0.954         | 1.030         | 1.615         | Q7L1W4       | LRRC8D    | Volume-regulated anion channel subunit LRRC8D                                |
| 1.048           | 0.941        | 0.931        | 1.083        | 0.671        | 1.023        | 0.841        | 0.909        | 1.010        |               |               |               | Q6NSJ5       | LRRC8E    | Volume-regulated anion channel subunit LRRC8E                                |
| 1.042           | 0.993        | 1.024        | 0.983        | 0.916        | 0.978        | 0.992        | 1.058        | 0.967        | 0.986         | 0.981         | 0.986         | P40337       | VHL       | Von Hippel-Lindau disease tumor suppressor                                   |
| 1.016           | 0.819        | 1.041        | 1.060        | 0.980        | 0.939        | 1.049        | 1.324        | 1.109        | 1.075         | 0.981         | 0.960         | O00534       | VWA5A     | von Willebrand factor A domain-containing protein 5A                         |
| 1.003           | 1.021        | 1.027        | 1.004        | 0.944        | 1.025        | 1.006        | 1.094        | 1.024        | 0.993         | 1.009         | 0.987         | A3KMH1       | VWA8      | von Willebrand factor A domain-containing protein 8                          |
|                 |              |              |              |              |              |              |              |              | 1.042         | 0.983         | 1.111         | Q8N2E2       | VWDE      | von Willebrand factor D and EGF domain-containing protein                    |

| Abundance Ratio |              |              |              |              |              |              |              |              |               |               |               | Accession ID | Gene name | Protein Description                                                     |
|-----------------|--------------|--------------|--------------|--------------|--------------|--------------|--------------|--------------|---------------|---------------|---------------|--------------|-----------|-------------------------------------------------------------------------|
| 1 d<br>M1/C1    | 1 d<br>M2/C2 | 1 d<br>M3/C3 | 4 d<br>M1/C1 | 4 d<br>M2/C2 | 4 d<br>M3/C3 | 7 d<br>M1/C1 | 7 d<br>M2/C2 | 7 d<br>M3/C3 | 10 d<br>M1/C1 | 10 d<br>M2/C2 | 10 d<br>M3/C3 |              |           |                                                                         |
| 0.975           | 0.924        | 1.135        |              |              |              | 0.795        | 0.698        | 0.830        | 1.429         | 1.404         | 1.243         | Q8N0Z9       | VSIG10    | V-set and immunoglobulin domain-containing protein 10                   |
|                 |              |              |              |              |              |              |              |              | 1.053         | 1.195         | 1.169         | Q9H7M9       | VSIR      | V-type immunoglobulin domain-containing suppressor of T-cell activation |
| 0.948           | 1.042        | 1.020        | 0.995        | 0.928        | 1.066        | 0.985        | 1.117        | 1.090        | 0.979         | 1.015         | 1.000         | Q9Y487       | ATP6V0A2  | V-type proton ATPase 116 kDa subunit a isoform 2                        |
| 1.020           | 0.996        | 1.032        | 0.963        | 0.875        | 1.023        | 0.997        | 1.007        | 1.031        | 1.036         | 0.984         | 1.004         | Q13488       | TCIRG1    | V-type proton ATPase 116 kDa subunit a isoform 3                        |
| 0.833           | 1.035        | 0.928        | 1.060        | 0.940        | 0.955        | 0.996        | 1.050        | 1.001        | 1.040         | 1.217         | 0.918         | P27449       | ATP6V0C   | V-type proton ATPase 16 kDa proteolipid subunit                         |
| 1.009           | 1.010        | 0.989        | 1.011        | 1.003        | 1.039        | 1.016        | 1.019        | 1.017        | 1.014         | 0.994         | 1.018         | P38606       | ATP6V1A   | V-type proton ATPase catalytic subunit A                                |
| 1.007           | 1.006        | 1.025        | 1.007        | 1.011        | 1.037        | 1.007        | 1.033        | 1.022        | 1.019         | 1.017         | 1.025         | P21281       | ATP6V1B2  | V-type proton ATPase subunit B, brain isoform                           |
| 0.988           | 0.976        | 1.008        | 1.015        | 1.004        | 1.080        | 1.038        | 1.023        | 1.052        | 1.006         | 0.993         | 1.022         | P21283       | ATP6V1C1  | V-type proton ATPase subunit C 1                                        |
| 1.011           | 1.000        | 1.005        | 1.020        | 1.020        | 1.069        | 1.060        | 1.068        | 1.019        | 1.038         | 1.007         | 1.033         | F5GYQ1       | ATP6V0D1  | V-type proton ATPase subunit d 1                                        |
|                 |              |              |              |              |              |              |              |              | 0.747         | 0.828         | 1.538         | Q8N8Y2       | ATP6V0D2  | V-type proton ATPase subunit d 2                                        |
| 1.017           | 0.998        | 1.030        | 1.008        | 0.994        | 1.048        | 1.000        | 0.959        | 1.042        | 1.052         | 0.997         | 1.051         | Q9Y5K8       | ATP6V1D   | V-type proton ATPase subunit D                                          |
| 0.982           | 0.989        | 0.994        | 0.997        | 0.997        | 1.030        | 0.972        | 0.991        | 1.014        | 1.015         | 1.027         | 1.025         | P36543       | ATP6V1E1  | V-type proton ATPase subunit E 1                                        |
| 1.147           | 1.038        | 1.116        | 1.034        | 1.182        | 1.052        | 1.058        | 0.818        | 1.110        | 1.052         | 1.017         | 1.072         | O75348       | ATP6V1G1  | V-type proton ATPase subunit G 1                                        |
| 1.009           | 0.995        | 1.006        | 1.017        | 0.922        | 1.027        | 1.013        | 1.009        | 0.977        | 1.013         | 1.004         | 1.023         | Q9UI12       | ATP6V1H   | V-type proton ATPase subunit H                                          |
| 0.955           | 0.964        | 1.006        | 1.025        | 0.965        | 1.041        | 1.042        | 1.100        | 1.032        | 1.006         | 1.057         | 1.003         | Q15904       | ATP6AP1   | V-type proton ATPase subunit S1                                         |
|                 |              |              | 1.092        | 0.852        | 1.103        | 1.099        | 1.219        | 0.899        | 1.099         | 1.063         | 1.031         | Q5VU97       | CACHD1    | VWFA and cache domain-containing protein 1                              |
|                 |              |              |              |              |              |              |              |              | 1.258         | 0.990         | 1.077         | Q14508       | WFDC2     | WAP four-disulfide core domain protein 2                                |
| 1.018           | 0.974        | 1.004        | 0.987        | 0.960        | 0.992        | 1.015        | 1.015        | 1.026        | 1.014         | 0.988         | 1.039         | Q6VEQ5       | WASH2P    | WAS protein family homolog 2                                            |
| 1.091           | 0.954        | 0.969        | 1.051        | 1.672        | 1.016        | 1.116        | 0.833        | 1.024        | 1.257         | 1.030         | 1.347         | Q9NQA3       | WASH6P    | WAS protein family homolog 6                                            |
| 1.031           | 1.004        | 1.062        | 0.984        | 0.940        | 1.019        | 0.982        | 1.039        | 1.010        | 1.026         | 0.990         | 1.054         | Q8TF74       | WIPF2     | WAS/WASL-interacting protein family member 2                            |
| 1.004           | 0.990        | 1.011        | 0.991        | 0.975        | 1.026        | 1.003        | 0.960        | 1.038        | 1.020         | 0.999         | 1.053         | Q641Q2       | WASHC2A   | WASH complex subunit 2A                                                 |
| 1.018           | 1.013        | 1.020        | 1.003        | 0.987        | 1.002        | 1.018        | 0.973        | 1.082        | 1.085         | 1.001         | 1.099         | A0A096LPC5   | WASHC2C   | WASH complex subunit 2C                                                 |
| 1.019           | 0.998        | 1.013        | 0.978        | 0.979        | 1.000        | 1.039        | 1.011        | 1.028        | 1.031         | 0.981         | 1.028         | Q9Y3C0       | WASHC3    | WASH complex subunit 3                                                  |
| 1.008           | 0.987        | 1.021        | 0.989        | 0.961        | 1.048        | 1.015        | 1.021        | 1.047        | 0.981         | 1.004         | 1.005         | A0A087X256   | WASHC4    | WASH complex subunit 4                                                  |
| 1.040           | 1.002        | 1.028        | 1.017        | 0.930        | 1.038        | 1.029        | 1.088        | 1.027        | 0.994         | 1.027         | 0.997         | Q12768       | WASHC5    | WASH complex subunit 5                                                  |
| 1.060           | 1.045        | 0.965        | 1.006        | 0.913        | 1.065        | 0.995        | 0.964        | 1.000        | 1.191         | 0.954         | 1.074         | Q8N5D0       | WDTC1     | WD and tetratricopeptide repeats protein 1                              |
| 0.688           | 1.211        | 1.020        | 1.135        | 0.872        | 1.011        | 1.134        | 0.947        | 0.947        | 1.025         | 1.000         | 1.096         | Q9H6R7       | WDCP      | WD repeat and coiled-coil-containing protein                            |
| 0.977           | 1.024        | 1.007        | 1.027        | 1.115        | 0.980        | 1.015        | 0.828        | 1.049        | 0.958         | 0.983         | 0.992         | Q8IWB7       | WDFY1     | WD repeat and FYVE domain-containing protein 1                          |
| 0.986           | 1.053        | 0.881        | 0.875        | 0.864        | 1.084        | 0.852        | 1.069        | 1.934        | 0.960         | 1.106         | 1.196         | Q96P53       | WDFY2     | WD repeat and FYVE domain-containing protein 2                          |
| 1.055           | 1.044        | 1.042        | 0.959        | 0.913        | 0.939        | 0.928        | 1.067        | 1.059        | 0.983         | 0.886         | 0.897         | Q8IZQ1       | WDFY3     | WD repeat and FYVE domain-containing protein 3                          |
| 0.977           | 1.000        | 1.015        | 0.960        | 0.948        | 0.988        | 1.058        | 0.994        | 1.022        | 0.941         | 0.941         | 1.081         | O75717       | WDHD1     | WD repeat and HMG-box DNA-binding protein 1                             |

| Abundance Ratio |              |              |              |              |              |              |              |              |               |               |               | Accession ID | Gene name | Protein Description                                     |
|-----------------|--------------|--------------|--------------|--------------|--------------|--------------|--------------|--------------|---------------|---------------|---------------|--------------|-----------|---------------------------------------------------------|
| 1 d<br>M1/C1    | 1 d<br>M2/C2 | 1 d<br>M3/C3 | 4 d<br>M1/C1 | 4 d<br>M2/C2 | 4 d<br>M3/C3 | 7 d<br>M1/C1 | 7 d<br>M2/C2 | 7 d<br>M3/C3 | 10 d<br>M1/C1 | 10 d<br>M2/C2 | 10 d<br>M3/C3 |              |           |                                                         |
| 1.062           | 0.988        | 1.085        | 1.031        | 0.929        | 1.038        | 1.034        | 0.975        | 1.001        | 0.956         | 1.037         | 0.990         | Q5MNZ9       | WIP1      | WD repeat domain phosphoinositide-interacting protein 1 |
| 1.027           | 0.990        | 0.958        | 1.008        | 0.921        | 0.932        | 0.989        | 1.035        | 0.985        | 1.000         | 0.983         | 1.008         | Q9Y4P8       | WIP2      | WD repeat domain phosphoinositide-interacting protein 2 |
| 1.037           | 1.012        | 1.003        | 1.039        | 0.977        | 0.948        | 0.992        | 1.073        | 0.990        | 0.993         | 1.029         | 1.009         | Q5MNZ6       | WDR45B    | WD repeat domain phosphoinositide-interacting protein 3 |
|                 |              |              |              |              |              | 1.071        | 0.985        | 0.989        |               |               |               | Q9BRX9       | WDR83     | WD repeat domain-containing protein 83                  |
| 1.068           | 0.962        | 1.018        | 0.983        | 1.012        | 1.059        | 1.016        | 0.933        | 0.997        | 0.993         | 1.002         | 1.227         | Q8N9V3       | WDSUB1    | WD repeat, SAM and U-box domain-containing protein 1    |
| 1.025           | 0.989        | 0.992        | 1.013        | 1.024        | 0.993        | 0.992        | 0.962        | 1.023        | 0.998         | 0.980         | 1.013         | O75083       | WDR1      | WD repeat-containing protein 1                          |
| 1.000           | 0.965        | 0.994        | 0.995        | 0.988        | 1.027        | 1.001        | 1.010        | 1.034        | 1.024         | 0.999         | 1.066         | Q9BZH6       | WDR11     | WD repeat-containing protein 11                         |
| 1.443           | 0.820        | 0.801        | 1.039        | 0.943        | 1.149        | 1.125        | 1.008        | 0.967        | 1.029         | 1.066         | 1.021         | A0A087X091   | WDR13     | WD repeat-containing protein 13 (Fragment)              |
| 1.038           | 1.019        | 1.056        | 1.019        | 0.987        | 1.023        | 1.039        | 1.049        | 1.002        | 1.043         | 1.006         | 1.044         | Q9H1Z4       | WDR13     | WD repeat-containing protein 13                         |
| 1.009           | 1.000        | 1.025        | 0.995        | 0.967        | 1.034        | 0.988        | 1.024        | 0.986        | 0.993         | 0.972         | 0.984         | Q9BV38       | WDR18     | WD repeat-containing protein 18                         |
| 1.040           | 1.006        | 0.992        | 1.013        | 0.951        | 1.026        | 0.965        | 1.017        | 1.078        | 1.061         | 0.965         | 1.053         | Q8NEZ3       | WDR19     | WD repeat-containing protein 19                         |
|                 |              |              | 1.027        | 1.169        | 1.105        |              |              |              | 1.040         | 1.007         | 1.030         | A0A088AWN2   | WDR20     | WD repeat-containing protein 20                         |
| 0.902           | 0.902        | 1.098        | 0.944        | 0.891        | 1.013        | 0.956        | 1.029        | 1.037        | 1.097         | 0.956         | 1.070         | Q96S15       | WDR24     | WD repeat-containing protein 24                         |
| 0.918           | 1.624        | 0.541        |              |              |              | 0.663        | 1.475        | 0.499        | 0.733         | 1.263         | 0.672         | Q64LD2       | WDR25     | WD repeat-containing protein 25                         |
| 1.035           | 1.014        | 1.018        | 0.990        | 0.945        | 1.063        | 1.021        | 1.095        | 1.021        | 0.937         | 0.989         | 0.998         | Q9H7D7       | WDR26     | WD repeat-containing protein 26                         |
| 1.047           | 0.987        | 1.022        | 0.993        | 0.961        | 1.041        | 1.026        | 1.080        | 1.020        | 1.019         | 1.010         | 1.004         | Q9UNX4       | WDR3      | WD repeat-containing protein 3                          |
| 1.052           | 1.009        | 1.032        | 0.965        | 0.908        | 0.937        | 0.910        | 0.999        | 1.046        | 0.888         | 0.962         | 0.980         | Q96EX3       | WDR34     | WD repeat-containing protein 34                         |
| 1.038           | 1.046        | 1.077        | 1.034        | 0.965        | 1.020        | 0.956        | 1.086        | 1.015        | 0.999         | 1.055         | 1.037         | Q9P2L0       | WDR35     | WD repeat-containing protein 35                         |
| 1.015           | 1.010        | 1.028        | 0.989        | 0.952        | 1.003        | 1.003        | 1.074        | 1.001        | 0.990         | 1.035         | 0.986         | Q8NI36       | WDR36     | WD repeat-containing protein 36                         |
| 1.056           | 1.018        | 1.054        | 0.968        | 0.974        | 1.051        | 0.971        | 0.986        | 1.084        | 0.966         | 1.001         | 1.025         | Q9HAD4       | WDR41     | WD repeat-containing protein 41                         |
| 0.952           | 1.015        | 1.024        | 0.970        | 0.968        | 1.022        | 0.984        | 1.054        | 0.983        | 0.995         | 1.008         | 1.047         | Q15061       | WDR43     | WD repeat-containing protein 43                         |
| 0.993           | 0.993        | 1.007        | 0.997        | 0.943        | 0.999        | 0.998        | 0.991        | 1.002        | 1.005         | 0.968         | 1.034         | Q5JSH3       | WDR44     | WD repeat-containing protein 44                         |
| 0.900           | 0.955        | 1.009        | 0.890        | 0.875        | 0.987        | 0.931        | 1.002        | 1.057        | 1.042         | 1.152         | 1.025         | A0A0G2JL1    | WDR46     | WD repeat-containing protein 46 (Fragment)              |
| 1.109           | 0.976        | 1.009        | 0.989        | 0.987        | 1.058        | 1.051        | 0.974        | 1.012        | 1.040         | 1.044         | 1.043         | O15213       | WDR46     | WD repeat-containing protein 46                         |
| 0.976           | 0.983        | 1.022        | 1.020        | 0.976        | 0.998        | 1.053        | 1.038        | 1.027        | 1.037         | 0.976         | 1.126         | Q8TAF3       | WDR48     | WD repeat-containing protein 48                         |
| 1.026           | 0.990        | 0.988        | 0.971        | 0.984        | 0.990        | 0.949        | 0.983        | 0.997        | 0.939         | 0.982         | 0.992         | P61964       | WDR5      | WD repeat-containing protein 5                          |
| 0.937           | 1.019        | 1.093        |              |              |              |              |              |              |               |               |               | Q7Z5U6       | WDR53     | WD repeat-containing protein 53                         |
| 1.028           | 0.964        | 1.058        | 1.005        | 0.993        | 1.294        | 1.012        | 1.083        | 1.087        | 0.965         | 0.913         | 1.081         | Q9H977       | WDR54     | WD repeat-containing protein 54                         |
| 0.961           | 1.021        | 1.018        | 0.978        | 0.932        | 0.998        | 1.027        | 1.025        | 0.983        | 1.047         | 0.966         | 1.076         | Q9H6Y2       | WDR55     | WD repeat-containing protein 55                         |
| 0.960           | 1.028        | 1.034        | 1.016        | 0.938        | 1.014        | 0.953        | 1.058        | 0.997        | 1.019         | 0.986         | 1.012         | Q6PJI9       | WDR59     | WD repeat-containing protein 59                         |
| 1.012           | 0.987        | 1.067        | 0.979        | 0.887        | 0.992        | 0.928        | 0.935        | 0.972        | 1.067         | 0.893         | 1.034         | A0A087X295   | WDR6      | WD repeat-containing protein 6                          |

| Abundance Ratio |              |              |              |              |              |              |              |              |               |               |               | Accession ID | Gene name | Protein Description                                    |
|-----------------|--------------|--------------|--------------|--------------|--------------|--------------|--------------|--------------|---------------|---------------|---------------|--------------|-----------|--------------------------------------------------------|
| 1 d<br>M1/C1    | 1 d<br>M2/C2 | 1 d<br>M3/C3 | 4 d<br>M1/C1 | 4 d<br>M2/C2 | 4 d<br>M3/C3 | 7 d<br>M1/C1 | 7 d<br>M2/C2 | 7 d<br>M3/C3 | 10 d<br>M1/C1 | 10 d<br>M2/C2 | 10 d<br>M3/C3 |              |           |                                                        |
| 1.226           | 0.886        | 1.185        | 0.979        | 0.914        | 1.018        | 0.940        | 0.952        | 0.999        | 1.053         | 0.855         | 0.950         | Q8WVS4       | WDR60     | WD repeat-containing protein 60                        |
| 1.032           | 0.994        | 1.006        | 1.014        | 0.972        | 0.965        | 0.987        | 1.060        | 1.006        | 0.954         | 0.980         | 0.945         | Q9GZS3       | WDR61     | WD repeat-containing protein 61                        |
| 0.997           | 1.024        | 0.969        | 0.967        | 0.926        | 1.023        | 0.995        | 1.067        | 1.003        | 0.998         | 0.959         | 1.052         | Q9Y4E6       | WDR7      | WD repeat-containing protein 7                         |
| 1.010           | 0.994        | 1.005        | 1.011        | 0.970        | 0.999        | 1.051        | 0.999        | 0.983        | 1.028         | 0.978         | 1.050         | Q9NW82       | WDR70     | WD repeat-containing protein 70                        |
| 1.012           | 0.979        | 1.015        | 0.995        | 0.978        | 0.981        | 0.999        | 1.081        | 1.072        | 0.970         | 1.001         | 1.038         | Q6RFH5       | WDR74     | WD repeat-containing protein 74                        |
| 1.024           | 1.006        | 0.973        | 0.992        | 1.003        | 1.011        | 0.965        | 1.027        | 1.060        | 0.913         | 1.008         | 0.960         | Q8IWA0       | WDR75     | WD repeat-containing protein 75                        |
| 1.088           | 0.985        | 1.034        | 0.997        | 0.970        | 0.864        | 1.121        | 1.585        | 0.953        | 0.939         | 0.964         | 0.929         | Q9H967       | WDR76     | WD repeat-containing protein 76                        |
| 0.990           | 1.007        | 1.044        | 1.015        | 0.972        | 1.019        | 1.039        | 1.065        | 1.012        | 1.052         | 0.975         | 1.074         | Q562E7       | WDR81     | WD repeat-containing protein 81                        |
| 1.019           | 1.012        | 0.997        | 1.045        | 1.020        | 0.959        | 1.047        | 0.969        | 0.995        | 1.038         | 1.014         | 1.024         | Q6UXN9       | WDR82     | WD repeat-containing protein 82                        |
|                 |              |              |              |              |              |              |              |              | 1.064         | 1.013         | 1.158         | E7ESW6       | WDR87     | WD repeat-containing protein 87                        |
| 0.906           | 0.938        | 0.951        | 0.928        | 0.946        | 1.087        | 1.035        | 1.009        | 1.046        | 1.038         | 1.034         | 1.115         | Q96FK6       | WDR89     | WD repeat-containing protein 89                        |
| 0.990           | 0.992        | 0.978        | 1.004        | 0.956        | 1.016        | 1.003        | 1.003        | 1.010        | 1.046         | 0.959         | 1.025         | A4D1P6       | WDR91     | WD repeat-containing protein 91                        |
| 1.034           | 0.987        | 0.977        | 1.004        | 1.008        | 1.010        | 1.122        | 0.980        | 0.983        | 1.044         | 1.039         | 1.041         | Q96MX6       | WDR92     | WD repeat-containing protein 92                        |
| 1.025           | 0.967        | 1.003        | 0.996        | 0.992        | 0.991        | 1.073        | 1.028        | 1.039        | 1.044         | 1.007         | 1.054         | Q9NXC5       | MIOS      | WD repeat-containing protein mio                       |
| 0.960           | 0.965        | 1.175        | 0.956        | 0.787        | 1.132        | 0.894        | 1.249        | 1.030        | 1.031         | 1.083         | 0.986         | Q9P2S5       | WRAP73    | WD repeat-containing protein WRAP73                    |
| 1.006           | 1.009        | 1.004        | 1.022        | 1.091        | 0.976        | 1.024        | 0.981        | 1.017        | 0.964         | 1.011         | 0.993         | Q2TAY7       | SMU1      | WD40 repeat-containing protein SMU1                    |
|                 |              |              |              |              |              | 0.979        | 1.120        | 1.123        |               |               |               | P30291       | WEE1      | Wee1-like protein kinase                               |
| 0.911           | 0.911        | 0.944        | 1.040        | 0.942        | 1.041        | 0.984        | 1.054        | 1.049        | 1.037         | 0.999         | 1.029         | Q14191       | WRN       | Werner syndrome ATP-dependent helicase                 |
| 1.030           | 1.024        | 1.013        | 1.070        | 0.918        | 1.040        | 1.059        | 1.005        | 0.970        | 0.992         | 1.033         | 1.159         | Q92558       | WASF1     | Wiskott-Aldrich syndrome protein family member 1       |
| 1.000           | 1.013        | 1.051        | 0.986        | 0.963        | 1.013        | 0.935        | 0.930        | 0.987        | 1.014         | 0.992         | 1.019         | Q9Y6W5       | WASF2     | Wiskott-Aldrich syndrome protein family member 2       |
|                 |              |              | 1.108        | 0.714        | 1.005        | 4.444        | 0.810        | 1.388        | 2.772         | 0.960         | 1.768         | Q9UPY6       | WASF3     | Wiskott-Aldrich syndrome protein family member 3       |
| 0.965           | 0.960        | 1.017        | 0.923        | 0.948        | 0.992        | 1.015        | 1.049        | 1.059        | 1.060         | 1.012         | 1.096         | O76024       | WFS1      | Wolframin                                              |
| 0.985           | 0.978        | 1.003        | 1.008        | 0.972        | 1.013        | 0.987        | 0.973        | 0.989        | 1.021         | 1.023         | 1.008         | Q9Y2W2       | WBP11     | WW domain-binding protein 11                           |
| 1.073           | 1.089        | 1.024        | 1.077        | 1.025        | 1.035        | 1.035        | 1.139        | 0.982        | 1.072         | 1.059         | 0.975         | Q969T9       | WBP2      | WW domain-binding protein 2                            |
| 1.049           | 0.945        | 0.977        | 1.039        | 0.994        | 0.971        | 0.936        | 0.884        | 1.001        | 1.027         | 1.011         | 1.050         | O75554       | WBP4      | WW domain-binding protein 4                            |
| 0.988           | 1.084        | 0.989        | 1.054        | 1.068        | 1.019        | 1.047        | 1.063        | 0.995        | 1.007         | 1.026         | 1.119         | Q9BTA9       | WAC       | WW domain-containing adapter protein with coiled-coil  |
| 1.075           | 1.001        | 0.999        | 1.026        | 0.937        | 0.977        | 1.023        | 0.947        | 1.007        | 1.202         | 0.954         | 1.039         | Q9NZC7       | WWOX      | WW domain-containing oxidoreductase                    |
| 0.996           | 0.984        | 1.051        | 1.013        | 0.857        | 0.832        | 1.032        | 0.957        | 1.006        | 0.988         | 0.946         | 0.919         | Q9GZV5       | WWTR1     | WW domain-containing transcription regulator protein 1 |
| 1.000           | 0.995        | 0.983        | 0.976        | 1.029        | 0.982        | 1.019        | 0.915        | 1.017        | 0.978         | 0.956         | 1.042         | P12955       | PEPD      | Xaa-Pro dipeptidase                                    |
| 1.085           | 0.985        | 1.073        | 0.935        | 0.861        | 1.026        |              |              |              | 1.301         | 1.258         | 1.191         | Q9UBH6       | XPR1      | Xenotropic and polytropic retrovirus receptor 1        |
|                 |              |              | 1.045        | 0.938        | 0.890        | 1.023        | 0.950        | 0.989        | 0.991         | 1.009         | 1.199         | Q92834       | RPGR      | X-linked retinitis pigmentosa GTPase regulator         |

| Abundance Ratio |              |              |              |              |              |              |              |              |               |               |               | Accession ID | Gene name | Protein Description                                         |
|-----------------|--------------|--------------|--------------|--------------|--------------|--------------|--------------|--------------|---------------|---------------|---------------|--------------|-----------|-------------------------------------------------------------|
| 1 d<br>M1/C1    | 1 d<br>M2/C2 | 1 d<br>M3/C3 | 4 d<br>M1/C1 | 4 d<br>M2/C2 | 4 d<br>M3/C3 | 7 d<br>M1/C1 | 7 d<br>M2/C2 | 7 d<br>M3/C3 | 10 d<br>M1/C1 | 10 d<br>M2/C2 | 10 d<br>M3/C3 |              |           |                                                             |
| 0.986           | 1.003        | 0.994        | 0.998        | 1.040        | 1.020        | 0.998        | 1.029        | 1.022        | 0.957         | 1.023         | 0.959         | P13010       | XRCC5     | X-ray repair cross-complementing protein 5                  |
| 1.009           | 1.009        | 0.986        | 0.991        | 0.995        | 0.987        | 0.972        | 1.023        | 0.997        | 0.970         | 1.017         | 0.952         | P12956       | XRCC6     | X-ray repair cross-complementing protein 6                  |
|                 |              |              | 0.958        | 1.031        | 1.085        |              |              |              | 0.676         | 0.915         | 0.943         | Q9H1B5       | XYLT2     | Xylosyltransferase 2                                        |
| 1.052           | 0.996        | 0.986        | 0.962        | 0.954        | 0.981        | 1.012        | 1.004        | 0.981        | 0.995         | 1.008         | 1.021         | O75191       | XYLB      | Xylulose kinase                                             |
| 0.885           | 1.111        | 1.072        |              |              |              |              |              |              |               |               |               | Q92536       | SLC7A6    | Y+L amino acid transporter 2                                |
| 0.998           | 0.992        | 0.993        | 0.994        | 1.006        | 1.027        | 1.042        | 0.917        | 0.986        | 1.094         | 1.057         | 1.115         | P16989       | YBX3      | Y-box-binding protein 3                                     |
| 1.054           | 1.016        | 1.076        | 0.991        | 0.996        | 0.996        | 0.989        | 1.113        | 1.062        | 0.957         | 0.958         | 1.159         | Q9ULM3       | YEATS2    | YEATS domain-containing protein 2                           |
| 1.188           | 1.128        | 1.045        | 1.016        | 0.950        | 0.957        | 0.960        | 1.036        | 1.086        | 0.920         | 0.949         | 0.846         | O95619       | YEATS4    | YEATS domain-containing protein 4                           |
| 1.045           | 0.984        | 1.010        | 1.005        | 0.941        | 1.073        | 1.011        | 1.157        | 1.101        | 1.006         | 1.033         | 1.008         | Q86U90       | YRDC      | YrdC domain-containing protein, mitochondrial               |
| 0.999           | 1.014        | 1.018        | 0.999        | 0.990        | 1.045        | 1.002        | 0.930        | 1.000        | 1.034         | 1.009         | 1.108         | Q9BYJ9       | YTHDF1    | YTH domain-containing family protein 1                      |
| 1.014           | 0.992        | 0.990        | 1.014        | 1.007        | 1.022        | 1.030        | 0.975        | 0.987        | 1.087         | 1.031         | 1.080         | Q9Y5A9       | YTHDF2    | YTH domain-containing family protein 2                      |
| 1.007           | 0.989        | 0.955        | 0.999        | 0.927        | 1.019        | 1.007        | 1.069        | 1.019        | 1.012         | 1.027         | 1.038         | A0A087WY31   | YTHDF3    | YTH domain-containing family protein 3                      |
| 1.014           | 1.121        | 0.940        |              |              |              |              |              |              |               |               |               | J3QR07       | YTHDC1    | YTH domain-containing protein 1                             |
| 1.000           | 0.975        | 0.984        | 1.010        | 1.045        | 1.020        | 1.010        | 0.966        | 1.012        | 1.007         | 1.046         | 1.030         | Q96MU7       | YTHDC1    | YTH domain-containing protein 1                             |
| 1.148           | 1.066        | 1.170        | 0.851        | 0.942        | 1.052        | 1.150        | 0.743        | 0.801        | 1.001         | 1.079         | 0.974         | Q9Y2K1       | ZBTB1     | Zinc finger and BTB domain-containing protein 1             |
| 1.020           | 1.010        | 0.873        | 1.014        | 0.978        | 1.062        | 0.963        | 1.119        | 1.087        | 0.856         | 1.105         | 1.070         | Q96DT7       | ZBTB10    | Zinc finger and BTB domain-containing protein 10            |
| 1.006           | 0.978        | 1.108        | 0.991        | 0.936        | 1.097        | 0.937        | 0.928        | 1.033        | 1.159         | 0.985         | 1.115         | O95625       | ZBTB11    | Zinc finger and BTB domain-containing protein 11            |
|                 |              |              | 1.147        | 1.204        | 1.104        |              |              |              | 1.048         | 1.039         | 0.823         | O43829       | ZBTB14    | Zinc finger and BTB domain-containing protein 14            |
|                 |              |              | 1.003        | 0.789        | 1.051        |              |              |              |               |               |               | Q05516       | ZBTB16    | Zinc finger and BTB domain-containing protein 16            |
| 1.032           | 0.892        | 1.095        | 1.080        | 0.989        | 0.864        | 1.024        | 1.008        | 1.004        | 0.937         | 0.960         | 1.056         | Q9HC78       | ZBTB20    | Zinc finger and BTB domain-containing protein 20            |
| 1.068           | 0.952        | 1.061        |              |              |              | 0.959        | 0.988        | 0.998        | 0.922         | 1.265         | 1.107         | Q9ULJ3       | ZBTB21    | Zinc finger and BTB domain-containing protein 21            |
|                 |              |              |              |              |              | 1.048        | 1.028        | 1.062        | 0.955         | 0.953         | 1.043         | O43167       | ZBTB24    | Zinc finger and BTB domain-containing protein 24            |
|                 |              |              | 1.045        | 0.986        | 0.845        |              |              |              |               |               |               | A0A0C4DFQ2   | ZBTB34    | Zinc finger and BTB domain-containing protein 34            |
|                 |              |              | 1.048        | 0.925        | 0.972        |              |              |              |               |               |               | Q9P1Z0       | ZBTB4     | Zinc finger and BTB domain-containing protein 4             |
| 0.937           | 0.929        | 0.933        | 0.693        | 1.030        | 1.155        | 0.907        | 0.946        | 0.962        | 0.939         | 0.990         | 0.995         | Q9NUA8       | ZBTB40    | Zinc finger and BTB domain-containing protein 40            |
|                 |              |              | 1.145        | 0.760        | 0.898        |              |              |              | 0.945         | 0.992         | 0.952         | O43298       | ZBTB43    | Zinc finger and BTB domain-containing protein 43            |
| 1.042           | 0.769        | 0.809        | 1.148        | 1.074        | 1.010        |              |              |              |               |               |               | HOYEM9       | ZBTB44    | Zinc finger and BTB domain-containing protein 44 (Fragment) |
|                 |              |              | 1.055        | 1.107        | 1.106        |              |              |              |               |               |               | Q96K62       | ZBTB45    | Zinc finger and BTB domain-containing protein 45            |
| 0.951           | 1.025        | 1.008        | 1.109        | 1.255        | 1.127        |              |              |              | 1.021         | 1.020         | 1.025         | O95365       | ZBTB7A    | Zinc finger and BTB domain-containing protein 7A            |
|                 |              |              | 1.105        | 1.018        | 1.167        |              |              |              |               |               |               | Q9Y5A6       | ZSCAN21   | Zinc finger and SCAN domain-containing protein 21           |
| 0.953           | 0.956        | 0.995        |              |              |              | 1.078        | 0.774        | 0.924        |               |               |               | A0A024RCN4   | ZNF187    | Zinc finger and SCAN domain-containing protein 26           |
| 1.118           | 1.077        | 1.056        | 1.119        | 1.109        | 1.215        | 0.997        | 1.165        | 1.167        | 0.883         | 1.108         | 1.167         | O96006       | ZBED1     | Zinc finger BED domain-containing protein 1                 |



| Abundance Ratio |              |              |              |              |              |              |              |              |               |               |               | Accession ID | Gene name | Protein Description                                              |
|-----------------|--------------|--------------|--------------|--------------|--------------|--------------|--------------|--------------|---------------|---------------|---------------|--------------|-----------|------------------------------------------------------------------|
| 1 d<br>M1/C1    | 1 d<br>M2/C2 | 1 d<br>M3/C3 | 4 d<br>M1/C1 | 4 d<br>M2/C2 | 4 d<br>M3/C3 | 7 d<br>M1/C1 | 7 d<br>M2/C2 | 7 d<br>M3/C3 | 10 d<br>M1/C1 | 10 d<br>M2/C2 | 10 d<br>M3/C3 |              |           |                                                                  |
|                 |              |              |              |              |              | 0.967        | 1.010        | 1.010        |               |               |               | P86452       | ZBED6     | Zinc finger BED domain-containing protein 6                      |
| 1.032           | 1.004        | 1.014        | 0.990        | 0.975        | 1.003        | 1.014        | 1.011        | 0.999        | 1.056         | 1.032         | 1.054         | Q96GY0       | ZC2HC1A   | Zinc finger C2HC domain-containing protein 1A                    |
| 1.106           | 0.995        | 1.152        | 0.972        | 0.886        | 0.996        | 1.059        | 1.053        | 1.002        | 1.002         | 1.006         | 1.051         | O60293       | ZFC3H1    | Zinc finger C3H1 domain-containing protein                       |
|                 |              |              |              |              |              |              |              |              | 1.369         | 1.381         | 1.299         | Q96K80       | ZC3H10    | Zinc finger CCCH domain-containing protein 10                    |
| 0.987           | 0.988        | 0.998        | 0.969        | 0.914        | 0.990        | 0.991        | 0.962        | 1.009        | 1.018         | 0.988         | 1.053         | O75152       | ZC3H11A   | Zinc finger CCCH domain-containing protein 11A                   |
| 1.030           | 0.997        | 1.037        | 0.980        | 0.999        | 1.043        | 0.993        | 0.870        | 0.954        | 1.047         | 0.994         | 1.050         | Q5T200       | ZC3H13    | Zinc finger CCCH domain-containing protein 13                    |
| 1.010           | 1.021        | 1.018        | 0.963        | 0.979        | 0.978        | 0.993        | 0.964        | 1.006        | 1.022         | 0.991         | 1.030         | Q6PJT7       | ZC3H14    | Zinc finger CCCH domain-containing protein 14                    |
| 0.973           | 0.990        | 1.002        | 1.032        | 0.958        | 1.015        | 1.017        | 0.934        | 1.024        | 1.003         | 1.003         | 1.016         | Q8WU90       | ZC3H15    | Zinc finger CCCH domain-containing protein 15                    |
| 0.982           | 0.991        | 1.011        | 0.959        | 0.967        | 1.020        | 0.935        | 0.862        | 0.982        | 1.036         | 1.009         | 1.050         | E7ERS3       | ZC3H18    | Zinc finger CCCH domain-containing protein 18                    |
| 1.491           | 1.109        | 1.210        |              |              |              |              |              |              |               |               |               | Q8IXZ2       | ZC3H3     | Zinc finger CCCH domain-containing protein 3                     |
| 1.006           | 1.000        | 0.994        | 1.000        | 0.971        | 0.989        | 0.970        | 0.974        | 1.004        | 0.994         | 1.046         | 1.054         | Q9UPT8       | ZC3H4     | Zinc finger CCCH domain-containing protein 4                     |
| 1.032           | 1.027        | 1.031        | 1.022        | 1.000        | 0.975        | 1.016        | 1.012        | 1.052        | 1.034         | 1.000         | 1.122         | Q8IWR0       | ZC3H7A    | Zinc finger CCCH domain-containing protein 7A                    |
| 1.077           | 1.058        | 1.039        | 1.035        | 0.969        | 0.991        | 1.062        | 1.026        | 1.026        | 1.061         | 0.992         | 1.065         | Q9UGR2       | ZC3H7B    | Zinc finger CCCH domain-containing protein 7B                    |
| 0.774           | 0.981        | 0.965        |              |              |              |              |              |              |               |               |               | A0A0C4DGZ1   | ZC3H8     | Zinc finger CCCH domain-containing protein 8                     |
| 0.981           | 0.998        | 1.014        | 0.988        | 0.983        | 1.006        | 0.983        | 0.977        | 0.979        | 0.999         | 1.042         | 1.006         | Q7Z2W4       | ZC3HAV1   | Zinc finger CCCH-type antiviral protein 1                        |
| 1.017           | 1.025        | 1.032        | 0.991        | 1.018        | 0.979        | 1.018        | 0.856        | 1.008        | 1.053         | 1.029         | 1.050         | Q96H79       | ZC3HAV1L  | Zinc finger CCCH-type antiviral protein 1-like                   |
|                 |              |              | 1.018        | 0.934        | 0.906        |              |              |              |               |               |               | Q8TBK6       | ZCCHC10   | Zinc finger CCHC domain-containing protein 10                    |
| 0.999           | 1.017        | 0.974        | 0.989        | 0.932        | 1.028        | 1.028        | 1.071        | 1.049        | 1.013         | 0.957         | 1.001         | Q9NUD5       | ZCCHC3    | Zinc finger CCHC domain-containing protein 3                     |
| 0.883           | 0.806        | 0.978        |              |              |              | 0.893        | 1.155        | 0.987        | 0.845         | 0.971         | 0.914         | Q9H5U6       | ZCCHC4    | Zinc finger CCHC domain-containing protein 4                     |
| 1.013           | 1.051        | 1.082        | 0.937        | 0.898        | 0.980        | 0.951        | 1.022        | 0.981        |               |               |               | Q8N3Z6       | ZCCHC7    | Zinc finger CCHC domain-containing protein 7                     |
| 1.054           | 1.010        | 0.996        | 0.985        | 0.947        | 0.969        | 1.018        | 1.067        | 1.016        | 1.004         | 1.003         | 1.036         | Q6NZY4       | ZCCHC8    | Zinc finger CCHC domain-containing protein 8                     |
| 1.037           | 1.047        | 1.194        | 1.004        | 1.045        | 0.996        | 0.972        | 0.898        | 1.071        | 1.056         | 1.003         | 1.161         | Q8N567       | ZCCHC9    | Zinc finger CCHC domain-containing protein 9                     |
| 1.065           | 1.158        | 1.110        | 0.963        | 1.126        | 0.964        | 1.006        | 1.159        | 0.961        | 0.966         | 1.144         | 1.056         | Q8TBF4       | ZCRB1     | Zinc finger CCHC-type and RNA-binding motif-containing protein 1 |
| 0.974           | 0.980        | 1.042        | 0.904        | 1.024        | 1.050        | 0.864        | 1.010        | 1.055        | 0.912         | 1.179         | 0.882         | G3V5N8       | ZFYVE1    | Zinc finger FYVE domain-containing protein 1                     |
| 0.978           | 0.986        | 0.992        | 0.980        | 0.907        | 1.003        | 1.000        | 1.065        | 0.983        | 1.007         | 0.996         | 1.050         | Q7Z3T8       | ZFYVE16   | Zinc finger FYVE domain-containing protein 16                    |
| 1.038           | 1.007        | 1.012        | 0.985        | 0.966        | 1.039        | 1.017        | 1.086        | 1.064        | 0.972         | 0.974         | 1.024         | Q68DK2       | ZFYVE26   | Zinc finger FYVE domain-containing protein 26                    |
| 1.135           | 1.205        | 0.897        | 1.351        | 0.729        | 0.842        | 0.922        | 1.225        | 1.124        |               |               |               | O95405       | ZFYVE9    | Zinc finger FYVE domain-containing protein 9                     |
| 0.964           | 0.986        | 1.097        | 1.052        | 1.018        | 1.147        | 1.114        | 0.966        | 1.053        | 1.202         | 1.114         | 1.128         | Q9UHR6       | ZNHIT2    | Zinc finger HIT domain-containing protein 2                      |
| 1.055           | 0.986        | 0.989        | 1.020        | 0.883        | 1.074        | 0.978        | 0.915        | 0.990        | 1.015         | 0.992         | 1.002         | Q96NC0       | ZMAT2     | Zinc finger matrin-type protein 2                                |
| 1.014           | 1.036        | 1.249        | 1.023        | 1.064        | 1.032        | 0.953        | 0.942        | 1.044        | 0.996         | 1.003         | 1.142         | Q9ULJ6       | ZMIZ1     | Zinc finger MIZ domain-containing protein 1                      |
| 0.990           | 1.006        | 1.022        |              |              |              | 0.965        | 1.169        | 1.052        |               |               |               | A0A087X127   | ZMIZ2     | Zinc finger MIZ domain-containing protein 2                      |
| 1.025           | 1.045        | 1.039        | 1.073        | 0.916        | 1.044        | 0.898        | 1.133        | 1.132        | 0.882         | 1.009         | 1.060         | Q5SVZ6       | ZMYM1     | Zinc finger MYM-type protein 1                                   |
| 1.060           | 0.954        | 1.016        | 0.885        | 0.880        | 0.991        | 0.872        | 0.923        | 1.051        | 0.995         | 0.985         | 1.041         | Q9UBW7       | ZMYM2     | Zinc finger MYM-type protein 2                                   |

| Abundance Ratio |              |              |              |              |              |              |              |              |               |               |               | Accession ID | Gene name | Protein Description                           |
|-----------------|--------------|--------------|--------------|--------------|--------------|--------------|--------------|--------------|---------------|---------------|---------------|--------------|-----------|-----------------------------------------------|
| 1 d<br>M1/C1    | 1 d<br>M2/C2 | 1 d<br>M3/C3 | 4 d<br>M1/C1 | 4 d<br>M2/C2 | 4 d<br>M3/C3 | 7 d<br>M1/C1 | 7 d<br>M2/C2 | 7 d<br>M3/C3 | 10 d<br>M1/C1 | 10 d<br>M2/C2 | 10 d<br>M3/C3 |              |           |                                               |
| 0.994           | 0.972        | 1.014        | 0.979        | 1.041        | 0.995        | 0.969        | 1.064        | 1.005        | 0.977         | 0.998         | 0.992         | A6NHB5       | ZMYM3     | Zinc finger MYM-type protein 3                |
| 0.986           | 0.974        | 1.029        | 0.936        | 0.926        | 0.948        | 0.916        | 0.899        | 0.941        | 0.937         | 1.032         | 1.002         | Q5VZL5       | ZMYM4     | Zinc finger MYM-type protein 4                |
| 1.005           | 0.937        | 1.058        | 1.019        | 0.958        | 1.017        | 1.024        | 0.918        | 0.882        | 0.969         | 1.014         | 1.002         | Q15326       | ZMYND11   | Zinc finger MYND domain-containing protein 11 |
| 1.062           | 1.231        | 1.344        |              |              |              |              |              |              |               |               |               | Q9H2Y7       | ZNF106    | Zinc finger protein 106                       |
|                 |              |              |              |              |              | 1.047        | 1.000        | 0.933        | 1.248         | 1.025         | 1.244         | Q8NC26       | ZNF114    | Zinc finger protein 114                       |
| 1.420           | 0.818        | 0.949        | 1.341        | 0.823        | 1.149        | 1.354        | 1.001        | 1.268        | 1.108         | 1.006         | 0.969         | P58317       | ZNF121    | Zinc finger protein 121                       |
| 1.024           | 0.953        | 1.036        | 0.997        | 0.936        | 1.031        | 0.982        | 0.934        | 1.046        | 1.035         | 0.976         | 0.975         | P52739       | ZNF131    | Zinc finger protein 131                       |
| 0.949           | 0.989        | 1.000        | 1.027        | 1.162        | 1.022        | 1.063        | 1.069        | 0.941        | 1.001         | 1.040         | 1.088         | P52747       | ZNF143    | Zinc finger protein 143                       |
| 1.041           | 1.001        | 1.036        | 1.021        | 0.939        | 1.022        | 1.035        | 0.975        | 1.007        | 1.013         | 1.040         | 1.032         | Q9UQR1       | ZNF148    | Zinc finger protein 148                       |
|                 |              |              | 1.412        | 1.175        | 1.282        |              |              |              |               |               |               | Q99676       | ZNF184    | Zinc finger protein 184                       |
| 1.028           | 0.995        | 0.980        | 1.011        | 0.989        | 0.950        | 1.008        | 0.862        | 0.930        | 1.039         | 0.983         | 1.021         | O15231       | ZNF185    | Zinc finger protein 185                       |
| 1.034           | 0.942        | 0.998        | 1.005        | 1.060        | 1.023        | 1.281        | 0.972        | 0.938        | 1.021         | 0.917         | 1.061         | O75362       | ZNF217    | Zinc finger protein 217                       |
| 0.922           | 1.001        | 1.361        | 0.812        | 1.003        | 0.996        |              |              |              |               |               |               | P17026       | ZNF22     | Zinc finger protein 22                        |
| 0.960           | 0.993        | 0.994        | 1.035        | 0.918        | 0.931        | 1.014        | 1.034        | 1.033        | 1.034         | 1.024         | 1.021         | P17028       | ZNF24     | Zinc finger protein 24                        |
| 1.213           | 0.930        | 1.064        | 1.252        | 0.973        | 1.002        | 0.822        | 1.111        | 1.176        | 0.944         | 1.005         | 1.013         | O43296       | ZNF264    | Zinc finger protein 264                       |
|                 |              |              | 0.961        | 0.821        | 1.108        | 0.963        | 0.965        | 0.958        |               |               |               | Q14587       | ZNF268    | Zinc finger protein 268                       |
|                 |              |              |              |              |              | 0.933        | 1.159        | 1.165        | 1.026         | 0.979         | 0.952         | Q9NRM2       | ZNF277    | Zinc finger protein 277                       |
| 0.945           | 1.098        | 0.990        |              |              |              | 0.771        | 0.683        | 0.495        |               |               |               | P17035       | ZNF28     | Zinc finger protein 28                        |
| 1.031           | 1.013        | 1.003        | 1.033        | 0.967        | 1.012        | 1.048        | 0.953        | 1.025        | 1.010         | 1.021         | 1.031         | Q8ND82       | ZNF280C   | Zinc finger protein 280C                      |
| 0.971           | 0.985        | 1.005        |              |              |              |              |              |              |               |               |               | Q6N043       | ZNF280D   | Zinc finger protein 280D                      |
| 1.028           | 0.991        | 1.019        | 1.016        | 0.981        | 1.013        | 1.001        | 1.033        | 0.972        | 0.981         | 1.043         | 0.977         | Q9Y2X9       | ZNF281    | Zinc finger protein 281                       |
| 0.988           | 0.959        | 1.066        | 0.951        | 0.977        | 0.892        | 0.867        | 0.898        | 0.896        | 0.999         | 1.100         | 1.069         | O60281       | ZNF292    | Zinc finger protein 292                       |
| 1.027           | 1.078        | 1.027        | 0.917        | 0.867        | 1.214        | 0.861        | 1.083        | 1.133        | 1.128         | 0.717         | 1.090         | A0A0D9SFG5   | ZNF302    | Zinc finger protein 302                       |
| 1.263           | 0.970        | 1.039        | 1.041        | 0.991        | 1.097        | 1.013        | 0.853        | 1.033        | 1.174         | 1.048         | 1.184         | A6NFI3       | ZNF316    | Zinc finger protein 316                       |
| 1.041           | 0.971        | 1.042        | 0.998        | 0.957        | 0.978        | 1.054        | 1.201        | 0.944        | 1.053         | 0.996         | 1.062         | Q5VUA4       | ZNF318    | Zinc finger protein 318                       |
|                 |              |              |              |              |              | 0.776        | 0.746        | 0.983        | 1.159         | 0.794         | 1.156         | A2RRD8       | ZNF320    | Zinc finger protein 320                       |
| 0.823           | 1.068        | 1.199        | 0.942        | 0.989        | 1.134        | 1.136        | 0.861        | 1.102        | 1.003         | 1.021         | 1.044         | Q9Y3S2       | ZNF330    | Zinc finger protein 330                       |
|                 |              |              |              |              |              | 0.899        | 1.020        | 1.049        |               |               |               | Q9H4Z2       | ZNF335    | Zinc finger protein 335                       |
| 1.638           | 0.706        | 1.096        |              |              |              |              |              |              |               |               |               | A0A0A0MR11   | ZNF33A    | Zinc finger protein 33A                       |
| 0.894           | 1.076        | 0.994        | 0.993        | 0.962        | 0.992        | 0.980        | 1.003        | 0.946        | 0.943         | 1.045         | 0.975         | Q9UL40       | ZNF346    | Zinc finger protein 346                       |
| 1.006           | 0.935        | 1.103        |              |              |              |              |              |              |               |               |               | Q96PM9       | ZNF385A   | Zinc finger protein 385A                      |
|                 |              |              |              |              |              | 1.172        | 1.130        | 0.917        |               |               |               | Q9H8N7       | ZNF395    | Zinc finger protein 395                       |
|                 |              |              | 1.060        | 0.915        | 0.983        |              |              |              | 0.895         | 1.081         | 0.905         | C9JLG1       | HIVEP1    | Zinc finger protein 40 (Fragment)             |
|                 |              |              |              |              |              |              |              |              | 0.983         | 0.946         | 1.000         | P15822       | HIVEP1    | Zinc finger protein 40                        |

| Abundance Ratio |              |              |              |              |              |              |              |              |               |               |               | Accession ID | Gene name | Protein Description                              |
|-----------------|--------------|--------------|--------------|--------------|--------------|--------------|--------------|--------------|---------------|---------------|---------------|--------------|-----------|--------------------------------------------------|
| 1 d<br>M1/C1    | 1 d<br>M2/C2 | 1 d<br>M3/C3 | 4 d<br>M1/C1 | 4 d<br>M2/C2 | 4 d<br>M3/C3 | 7 d<br>M1/C1 | 7 d<br>M2/C2 | 7 d<br>M3/C3 | 10 d<br>M1/C1 | 10 d<br>M2/C2 | 10 d<br>M3/C3 |              |           |                                                  |
| 1.049           | 0.899        | 0.908        |              |              |              | 1.353        | 0.708        | 1.230        | 0.922         | 0.906         | 1.120         | M0QXZ5       | ZNF428    | Zinc finger protein 428 (Fragment)               |
| 1.126           | 1.038        | 1.004        |              |              |              |              |              |              |               |               |               | P59923       | ZNF445    | Zinc finger protein 445                          |
| 1.047           | 0.929        | 1.104        |              |              |              | 1.072        | 1.262        | 1.265        |               |               |               | Q9NWS9       | ZNF446    | Zinc finger protein 446                          |
| 1.024           | 0.896        | 1.117        | 0.903        | 0.976        | 1.372        |              |              |              |               |               |               | Q14592       | ZNF460    | Zinc finger protein 460                          |
|                 |              |              |              |              |              | 0.963        | 1.003        | 0.930        |               |               |               | Q8NCK3       | ZNF485    | Zinc finger protein 485                          |
| 0.966           | 1.014        | 1.026        | 1.008        | 0.998        | 1.011        | 1.061        | 0.925        | 0.942        | 1.116         | 0.962         | 1.067         | Q96ME7       | ZNF512    | Zinc finger protein 512                          |
| 1.098           | 1.084        | 1.078        | 1.014        | 0.974        | 0.922        | 0.944        | 0.976        | 0.969        | 0.965         | 1.113         | 0.918         | Q96KM6       | ZNF512B   | Zinc finger protein 512B                         |
| 0.932           | 0.858        | 0.942        | 1.188        | 0.944        | 1.540        | 1.071        | 1.098        | 1.159        | 0.906         | 1.157         | 1.100         | Q92618       | ZNF516    | Zinc finger protein 516                          |
|                 |              |              |              |              |              | 1.361        | 0.943        | 0.869        | 1.049         | 1.114         | 0.968         | Q96C55       | ZNF524    | Zinc finger protein 524                          |
| 1.103           | 0.826        | 1.550        |              |              |              |              |              |              |               |               |               | Q8TF50       | ZNF526    | Zinc finger protein 526                          |
| 0.990           | 1.060        | 0.938        | 0.992        | 1.066        | 0.995        | 1.049        | 1.134        | 1.016        | 1.053         | 1.027         | 0.891         | Q9HCE3       | ZNF532    | Zinc finger protein 532                          |
|                 |              |              | 0.830        | 1.083        | 1.079        |              |              |              |               |               |               | Q86YE8       | ZNF573    | Zinc finger protein 573                          |
| 0.928           | 1.114        | 1.031        |              |              |              |              |              |              |               |               |               | Q96N58       | ZNF578    | Zinc finger protein 578                          |
| 1.050           | 0.924        | 1.033        | 1.024        | 0.919        | 0.952        | 0.989        | 0.864        | 0.943        | 1.079         | 0.946         | 1.050         | Q8NAF0       | ZNF579    | Zinc finger protein 579                          |
| 0.729           | 1.058        | 1.137        |              |              |              |              |              |              |               |               |               | Q9UK33       | ZNF580    | Zinc finger protein 580                          |
|                 |              |              |              |              |              |              |              |              | 1.117         | 1.258         | 1.441         | Q96SQ5       | ZNF587    | Zinc finger protein 587                          |
| 1.065           | 0.978        | 0.979        | 1.028        | 0.968        | 0.945        |              |              |              | 0.926         | 0.939         | 1.033         | Q92610       | ZNF592    | Zinc finger protein 592                          |
| 1.006           | 0.950        | 1.046        | 0.970        | 1.004        | 1.049        | 1.027        | 1.061        | 0.996        | 1.034         | 1.069         | 1.030         | O00488       | ZNF593    | Zinc finger protein 593                          |
| 1.032           | 0.943        | 1.193        | 1.013        | 0.916        | 1.028        | 1.026        | 1.008        | 0.988        | 1.135         | 1.079         | 1.034         | O15014       | ZNF609    | Zinc finger protein 609                          |
| 1.302           | 0.786        | 0.955        |              |              |              | 0.779        | 0.533        | 1.020        |               |               |               | Q08AN1       | ZNF616    | Zinc finger protein 616                          |
| 1.033           | 0.994        | 1.140        | 1.078        | 0.954        | 0.954        | 0.974        | 0.965        | 0.870        | 1.217         | 0.998         | 0.994         | Q5T7W0       | ZNF618    | Zinc finger protein 618                          |
|                 |              |              |              |              |              |              |              |              | 1.135         | 1.072         | 0.857         | Q6ZSS3       | ZNF621    | Zinc finger protein 621                          |
| 1.019           | 0.991        | 1.000        | 0.988        | 0.968        | 1.006        | 1.022        | 0.949        | 0.976        | 1.013         | 1.007         | 1.073         | Q969S3       | ZNF622    | Zinc finger protein 622                          |
| 0.957           | 1.138        | 0.999        | 1.014        | 0.876        | 1.015        | 0.971        | 1.408        | 1.065        | 0.936         | 1.173         | 0.803         | Q9UEG4       | ZNF629    | Zinc finger protein 629                          |
| 1.032           | 0.993        | 1.022        | 0.983        | 0.950        | 0.960        | 0.973        | 0.935        | 0.980        | 1.000         | 0.999         | 1.027         | Q14966       | ZNF638    | Zinc finger protein 638                          |
|                 |              |              |              |              |              |              |              |              | 0.887         | 1.002         | 1.073         | Q9UID6       | ZNF639    | Zinc finger protein 639                          |
| 0.925           | 0.858        | 1.083        | 0.977        | 0.905        | 0.813        |              |              |              | 0.700         | 1.181         | 1.007         | Q9NPA5       | ZFP64     | Zinc finger protein 64 homolog, isoforms 1 and 2 |
| 0.980           | 1.079        | 0.946        | 0.968        | 1.044        | 0.976        | 1.103        | 0.991        | 0.950        | 1.033         | 1.157         | 0.999         | Q9NTW7       | ZFP64     | Zinc finger protein 64 homolog, isoforms 3 and 4 |
| 1.135           | 0.995        | 1.145        | 1.001        | 0.894        | 1.082        | 0.979        | 1.192        | 0.986        | 1.049         | 1.201         | 0.903         | Q9H582       | ZNF644    | Zinc finger protein 644                          |
| 1.027           | 0.996        | 1.042        | 1.286        | 0.852        | 1.074        | 1.047        | 1.038        | 1.011        | 1.034         | 0.914         | 1.038         | A0A1B0GWA0   | ZNF654    | Zinc finger protein 654                          |
|                 |              |              |              |              |              |              |              |              | 0.822         | 1.004         | 0.876         | Q96BR6       | ZNF669    | Zinc finger protein 669                          |
| 1.002           | 1.021        | 1.066        | 0.969        | 0.975        | 1.115        | 1.020        | 1.081        | 1.005        | 1.064         | 0.976         | 1.108         | Q8N1G0       | ZNF687    | Zinc finger protein 687                          |
|                 |              |              | 0.958        | 1.010        | 0.966        |              |              |              |               |               |               | Q9H7X3       | ZNF696    | Zinc finger protein 696                          |
| 1.898           | 0.951        | 1.030        | 1.135        | 1.725        | 0.854        | 1.114        | 0.698        | 1.014        | 0.967         | 0.979         | 0.910         | Q9Y5V0       | ZNF706    | Zinc finger protein 706                          |

| Abundance Ratio |              |              |              |              |              |              |              |              |               |               |               | Accession ID | Gene name | Protein Description                                         |
|-----------------|--------------|--------------|--------------|--------------|--------------|--------------|--------------|--------------|---------------|---------------|---------------|--------------|-----------|-------------------------------------------------------------|
| 1 d<br>M1/C1    | 1 d<br>M2/C2 | 1 d<br>M3/C3 | 4 d<br>M1/C1 | 4 d<br>M2/C2 | 4 d<br>M3/C3 | 7 d<br>M1/C1 | 7 d<br>M2/C2 | 7 d<br>M3/C3 | 10 d<br>M1/C1 | 10 d<br>M2/C2 | 10 d<br>M3/C3 |              |           |                                                             |
|                 |              |              | 0.876        | 1.032        | 0.955        | 1.109        | 1.115        | 0.663        |               |               |               | Q8NDX6       | ZNF740    | Zinc finger protein 740                                     |
| 1.126           | 1.012        | 0.998        | 1.042        | 1.049        | 0.957        | 0.954        | 0.750        | 0.877        | 1.050         | 0.991         | 1.009         | Q9H5H4       | ZNF768    | Zinc finger protein 768                                     |
| 1.041           | 1.025        | 0.921        | 1.042        | 0.978        | 1.073        | 1.084        | 0.983        | 1.092        | 1.159         | 1.146         | 1.188         | A0A087WUD1   | ZNF787    | Zinc finger protein 787                                     |
| 0.924           | 0.928        | 1.064        | 0.846        | 1.101        | 0.984        | 0.950        | 0.687        | 0.936        | 1.205         | 0.943         | 1.015         | P17098       | ZNF8      | Zinc finger protein 8                                       |
| 0.994           | 1.044        | 0.983        | 0.989        | 0.965        | 1.029        | 0.984        | 0.938        | 0.994        | 1.023         | 0.999         | 1.063         | Q2TB10       | ZNF800    | Zinc finger protein 800                                     |
|                 |              |              |              |              |              |              |              |              | 0.990         | 0.913         | 0.996         | Q5CZA5       | ZNF805    | Zinc finger protein 805                                     |
| 0.988           | 1.008        | 0.998        | 0.953        | 0.932        | 1.001        | 1.026        | 0.884        | 1.038        | 1.095         | 1.045         | 1.118         | Q6ZN06       | ZNF813    | Zinc finger protein 813                                     |
| 1.166           | 1.416        | 0.871        |              |              |              |              |              |              |               |               |               | Q17R98       | ZNF827    | Zinc finger protein 827                                     |
| 0.960           | 0.977        | 1.036        | 0.983        | 0.896        | 1.002        | 0.990        | 0.992        | 1.034        | 0.927         | 1.040         | 1.099         | Q96NB3       | ZNF830    | Zinc finger protein 830                                     |
| 0.931           | 0.906        | 1.077        | 0.836        | 1.192        | 1.015        | 0.864        | 0.582        | 0.965        | 0.959         | 1.059         | 1.054         | Q96IR2       | ZNF845    | Zinc finger protein 845                                     |
|                 |              |              | 1.083        | 0.865        | 0.951        |              |              |              |               |               |               | P0CJ78       | ZNF865    | Zinc finger protein 865                                     |
| 1.009           | 0.957        | 0.882        | 0.925        | 0.935        | 0.982        |              |              |              | 1.144         | 1.137         | 1.030         | P0CJ79       | ZNF888    | Zinc finger protein 888                                     |
| 0.988           | 1.041        | 1.200        |              |              |              | 1.161        | 1.023        | 1.096        | 1.059         | 0.983         | 0.994         | P35789       | ZNF93     | Zinc finger protein 93                                      |
|                 |              |              |              |              |              | 1.070        | 1.393        | 1.127        | 1.100         | 0.976         | 1.048         | Q92784       | DPF3      | Zinc finger protein DPF3                                    |
|                 |              |              |              |              |              |              |              |              | 0.914         | 0.868         | 1.067         | Q15072       | ZNF146    | Zinc finger protein OZF                                     |
| 1.019           | 0.900        | 1.009        | 0.983        | 0.936        | 1.041        | 1.070        | 1.070        | 1.008        | 1.005         | 0.954         | 1.022         | P14373       | TRIM27    | Zinc finger protein RFP                                     |
| 1.055           | 0.854        | 0.923        | 1.199        | 1.020        | 0.974        |              |              |              |               |               |               | Q13129       | RLF       | Zinc finger protein Rlf                                     |
| 0.971           | 0.977        | 0.947        | 0.992        | 0.986        | 0.970        | 1.018        | 0.988        | 0.979        | 1.025         | 1.007         | 1.053         | J3KMZ8       | DPF2      | Zinc finger protein ubi-d4                                  |
| 1.075           | 1.045        | 0.988        | 1.074        | 1.043        | 1.160        | 0.988        | 1.063        | 1.031        | 1.052         | 1.135         | 1.058         | P17029       | ZKSCAN1   | Zinc finger protein with KRAB and SCAN domains 1            |
|                 |              |              | 1.037        | 0.903        | 1.109        | 0.915        | 1.030        | 1.003        |               |               |               | Q969J2       | ZKSCAN4   | Zinc finger protein with KRAB and SCAN domains 4            |
| 1.178           | 1.013        | 1.099        | 1.051        | 0.974        | 1.025        | 1.056        | 1.061        | 0.938        | 1.102         | 1.011         | 1.085         | Q15776       | ZKSCAN8   | Zinc finger protein with KRAB and SCAN domains 8            |
|                 |              |              | 0.947        | 0.889        | 1.041        |              |              |              |               |               |               | Q8IX07       | ZFPM1     | Zinc finger protein ZFPM1                                   |
| 1.032           | 0.997        | 1.014        | 1.014        | 0.992        | 1.084        | 1.028        | 1.068        | 1.044        | 1.035         | 1.027         | 1.058         | O75312       | ZPR1      | Zinc finger protein ZPR1                                    |
|                 |              |              | 0.954        | 1.320        | 0.808        | 1.044        | 1.049        | 1.004        | 0.949         | 1.050         | 0.984         | O95159       | ZFPL1     | Zinc finger protein-like 1                                  |
| 1.063           | 1.006        | 1.001        | 1.023        | 1.305        | 0.975        | 1.056        | 0.806        | 1.033        | 1.026         | 1.015         | 1.051         | O95218       | ZRANB2    | Zinc finger Ran-binding domain-containing protein 2         |
| 1.001           | 1.019        | 1.010        | 1.003        | 1.002        | 0.997        | 0.984        | 0.984        | 1.000        | 1.011         | 1.017         | 1.000         | Q96KR1       | ZFR       | Zinc finger RNA-binding protein                             |
| 1.048           | 1.004        | 0.995        | 1.004        | 0.952        | 1.002        | 1.049        | 1.033        | 1.004        | 1.009         | 1.035         | 1.040         | O43149       | ZZEF1     | Zinc finger ZZ-type and EF-hand domain-containing protein 1 |
| 1.022           | 0.988        | 1.025        | 0.876        | 0.851        | 1.340        |              |              |              |               |               |               | Q9UKY1       | ZHX1      | Zinc fingers and homeoboxes protein 1                       |
| 1.103           | 1.103        | 0.902        | 1.015        | 1.123        | 1.020        | 1.057        | 0.932        | 1.049        |               |               |               | Q9Y6X8       | ZHX2      | Zinc fingers and homeoboxes protein 2                       |
| 0.915           | 0.748        | 1.307        | 1.139        | 1.172        | 1.456        |              |              |              | 1.007         | 0.999         | 0.833         | Q9H4I2       | ZHX3      | Zinc fingers and homeoboxes protein 3                       |
| 0.978           | 1.029        | 1.023        | 1.074        | 1.041        | 1.098        | 1.070        | 1.021        | 1.065        | 1.045         | 1.016         | 1.061         | Q9BQ52       | ELAC2     | Zinc phosphodiesterase ELAC protein 2                       |

| Abundance Ratio |              |              |              |              |              |              |              |              |               |               |               | Accession ID | Gene name    | Protein Description                      |
|-----------------|--------------|--------------|--------------|--------------|--------------|--------------|--------------|--------------|---------------|---------------|---------------|--------------|--------------|------------------------------------------|
| 1 d<br>M1/C1    | 1 d<br>M2/C2 | 1 d<br>M3/C3 | 4 d<br>M1/C1 | 4 d<br>M2/C2 | 4 d<br>M3/C3 | 7 d<br>M1/C1 | 7 d<br>M2/C2 | 7 d<br>M3/C3 | 10 d<br>M1/C1 | 10 d<br>M2/C2 | 10 d<br>M3/C3 |              |              |                                          |
| 1.008           | 0.977        | 1.005        | 1.031        | 0.958        | 1.070        | 1.063        | 1.062        | 1.101        | 1.036         | 1.013         | 1.088         | Q9Y6M5       | SLC30A1      | Zinc transporter 1                       |
| 0.941           | 1.028        | 0.985        | 0.931        | 0.856        | 0.973        | 0.941        | 1.176        | 0.961        | 1.026         | 1.053         | 0.985         | Q8TAD4       | SLC30A5      | Zinc transporter 5                       |
| 1.098           | 0.807        | 0.989        | 1.112        | 0.874        | 1.086        | 1.103        | 0.959        | 1.027        | 1.143         | 1.092         | 0.988         | Q8NEW0       | SLC30A7      | Zinc transporter 7                       |
| 0.928           | 0.960        | 0.994        | 0.983        | 0.839        | 0.985        | 1.003        | 1.023        | 1.006        | 1.074         | 0.979         | 1.088         | Q6PML9       | SLC30A9      | Zinc transporter 9                       |
| 0.973           | 1.038        | 0.965        | 0.985        | 0.894        | 0.953        | 0.862        | 0.798        | 1.027        | 1.006         | 1.012         | 0.981         | Q92504       | SLC39A7      | Zinc transporter SLC39A7                 |
| 1.009           | 0.835        | 1.066        | 0.953        | 0.896        | 1.160        | 1.074        | 0.934        | 1.083        | 1.333         | 1.181         | 1.232         | Q9NY26       | SLC39A1      | Zinc transporter ZIP1                    |
| 1.106           | 0.956        | 1.146        | 1.102        | 0.830        | 1.276        | 0.962        | 1.155        | 0.963        |               |               |               | Q9ULF5       | SLC39A10     | Zinc transporter ZIP10                   |
| 0.962           | 0.964        | 0.954        | 0.981        | 0.940        | 1.032        | 1.026        | 0.929        | 1.040        | 1.017         | 0.882         | 1.071         | Q8N1S5       | SLC39A11     | Zinc transporter ZIP11                   |
| 1.001           | 1.045        | 1.079        | 1.127        | 0.899        | 1.194        |              |              |              | 1.260         | 1.072         | 0.766         | Q15043       | SLC39A14     | Zinc transporter ZIP14                   |
| 0.931           | 0.999        | 0.909        | 0.930        | 0.956        | 1.088        |              |              |              | 0.980         | 0.998         | 1.078         | Q13433       | SLC39A6      | Zinc transporter ZIP6                    |
|                 |              |              |              |              |              | 1.095        | 1.149        | 0.970        | 1.143         | 1.002         | 1.337         | H7BY64       | ZNF511-PRAP1 | ZNF511-PRAP1 readthrough (Fragment)      |
| 1.002           | 1.042        | 1.051        |              |              |              |              |              |              | 1.017         | 0.976         | 1.026         | O95229       | ZWINT        | ZW10 interactor                          |
| 1.272           | 1.131        | 1.044        | 1.012        | 0.888        | 0.761        | 0.890        | 1.125        | 0.943        | 0.875         | 0.953         | 0.834         | H0Y2Y8       | ZYX          | Zyxin (Fragment)                         |
| 1.027           | 1.034        | 0.995        | 1.007        | 1.095        | 0.938        | 1.031        | 0.991        | 0.974        | 0.989         | 0.996         | 1.014         | Q15942       | ZYX          | Zyxin                                    |
| 0.677           | 0.936        | 0.928        | 0.951        | 0.868        | 1.038        |              |              |              | 0.781         | 1.106         | 1.007         | Q8IYH5       | ZZZ3         | ZZ-type zinc finger-containing protein 3 |

C, control cell; M, MAG-treated cell.
