# Supplementary material for: Bacterial Magnetosomes Release Iron Ions and Induce Regulation of Iron Homeostasis in Endothelial Cells
Source: MDPI journal article supplement (doi:10.3390/nano12223995), 2022-11-13
Supplement: s1 [file s1]

Table S4. Zeta potential characterization of MAGs and IONPs.

| Nanoparticle | Zeta Potential (mV) |              |
|--------------|---------------------|--------------|
|              | In H <sub>2</sub> O | In Plasma*   |
| MAGs         | -18.6 ± 0.35        | -21.7 ± 0.1  |
| IONPs        | 34.7 ± 1.02         | -15.4 ± 0.12 |

Data are shown in mean ± SD of three independent experiments.

\*Zeta potential of nanoparticles in plasma were analyzed by magnet isolation after plasma exposure and resuspended in water by vortex.
