# Supplementary material for: Bacterial Magnetosomes Release Iron Ions and Induce Regulation of Iron Homeostasis in Endothelial Cells
Source: MDPI journal article supplement (doi:10.3390/nano12223995), 2022-11-13
Supplement: s1 [file s1]

Table S7. Cellular Component enrichment of the differential expressed proteins from 4 time points of ECs under MAGs treatment.

| ID         | Term                  | Ontology Source                  | P Value* | % Associated Genes | Nr. Genes | Associated Genes Found                                                                                                                                                                                                        |
|------------|-----------------------|----------------------------------|----------|--------------------|-----------|-------------------------------------------------------------------------------------------------------------------------------------------------------------------------------------------------------------------------------|
| GO:0005768 | endosome              | GO_CellularComponent-EBI-UniProt | 9.14E-05 | 2.02               | 22        | [ANTXR2, AP1B1, AP4M1, C9orf72, CD63, CLCN5, HSPA8, LAPTM4A, LGMN, LTF, MICALL2, PLPP2, PSAP, RNF13, SDF4, SH3TC2, SLC11A2, TBC1D16, TFRC, UBA52, WASH6P, WDFY2]                                                              |
| GO:1903561 | extracellular vesicle | GO_CellularComponent-EBI-UniProt | 3.56E-04 | 1.47               | 34        | [AP4M1, CANX, CD40, CD63, CPQ, DNASE2, FTH1, FTL, GBA, H3-3A, HRNR, HSPA8, ITGB8, LBP, LGMN, LTF, MYH14, MYL6, PLPP1, PPT1, PSAP, PTTG1IP, RNH1, RPS29, SAA1, SCARB1, SDF4, SLC11A2, SRI, TFRC, TGFBI, TM7SF3, TSPAN3, UBA52] |
| GO:0005764 | lysosome              | GO_CellularComponent-EBI-UniProt | 6.60E-08 | 3.00               | 24        | [AP1B1, ATRAID, C9orf72, CD63, CLCN5, CPQ, DNASE2, FTH1, FTL, GBA, HPSE, HRNR, HSPA8, LAPTM4A, LGMN, LIPA, PPT1, PSAP, RNF13, SCARB1, SHKBP1, SLC11A2, SLC36A1, UBA52]                                                        |
| GO:0005765 | lysosomal membrane    | GO_CellularComponent-EBI-UniProt | 6.60E-08 | 3.19               | 14        | [AP1B1, ATRAID, CD63, CLCN5, GBA, HPSE, HSPA8, LAPTM4A, PSAP, RNF13, SCARB1, SLC11A2, SLC36A1, UBA52]                                                                                                                         |
| GO:0005775 | vacuolar lumen        | GO_CellularComponent-EBI-UniProt | 8.05E-05 | 4.57               | 9         | [FTL, GBA, HPSE, HRNR, HSPA8, LGMN, LIPA, PPT1, PSAP]                                                                                                                                                                         |
| GO:0043202 | lysosomal lumen       | GO_CellularComponent-EBI-UniProt | 8.05E-05 | 6.48               | 7         | [GBA, HPSE, HSPA8, LGMN, LIPA, PPT1, PSAP]                                                                                                                                                                                    |

\* *p*-Value was corrected with Bonferroni step down
