# Supplementary material for: Bacterial Magnetosomes Release Iron Ions and Induce Regulation of Iron Homeostasis in Endothelial Cells
Source: MDPI journal article supplement (doi:10.3390/nano12223995), 2022-11-13
Supplement: s1 [file s1]

Table S2. MAG intrinsic membrane proteins identified by proteomic analysis.

| Protein IDs  | Unique peptides | Unique sequence coverage [%] | Mol. weight [kDa] | Relative abundance (%) | MS/MS Count | Gene name | Protein description                                                                                                         |
|--------------|-----------------|------------------------------|-------------------|------------------------|-------------|-----------|-----------------------------------------------------------------------------------------------------------------------------|
| V6F5J2_9PROT | 24              | 84.8                         | 24.01             | 0.26                   | 67          | mamA      | Magnetosome protein MamA                                                                                                    |
| V6F510_9PROT | 10              | 19.5                         | 31.94             | 0.88                   | 73          | mamB      | Magnetosome protein MamB, Cation efflux protein                                                                             |
| V6F534_9PROT | 13              | 68.8                         | 12.39             | 18.96                  | 714         | mamC      | Magnetosome protein MamC                                                                                                    |
| V6F2D1_9PROT | 15              | 45.9                         | 30.23             | 3.41                   | 158         | mamD      | Magnetosome protein MamD                                                                                                    |
| V6F2B6_9PROT | 32              | 37.8                         | 78.04             | 2.29                   | 422         | mamE      | Magnetosome protein MamE, containing Serine/cysteine peptidase, trypsin-like domain and HrtA/DegP2/Q/S Peptidase S1C domain |
| V6F254_9PROT | 3               | 27                           | 12.34             | 0.20                   | 20          | mamF      | Magnetosome protein MamF                                                                                                    |
| V6F519_9PROT | 16              | 29.8                         | 48.52             | 0.59                   | 69          | mamJ      | MamJ protein                                                                                                                |
| V6F2H8_9PROT | 5               | 16.1                         | 37.58             | 0.01                   | 15          | mamK      | Magnetosome cytoskeleton protein MamK                                                                                       |
| V6F235_9PROT | 10              | 24.8                         | 34.49             | 0.40                   | 81          | mamM      | Magnetosome protein MamM, containing Cation efflux protein                                                                  |
| V6F515_9PROT | 10              | 19.8                         | 65.38             | 0.64                   | 86          | mamO      | Probable membrane transporter protein                                                                                       |
| V6F2H3_9PROT | 14              | 41.9                         | 28.36             | 2.64                   | 109         | mamP      | Magnetosome protein MamP, containing PDZ-like domain                                                                        |
| V6F2A7_9PROT | 5               | 61.9                         | 9.33              | 0.05                   | 13          | mamR      | Magnetosome protein MamR, containing Excisionase/Xis, DNA-binding domain                                                    |
| V6F2G8_9PROT | 6               | 28.9                         | 18.71             | 0.61                   | 53          | mamS      | Magnetosome protein MamS                                                                                                    |
| V6F5I9_9PROT | 12              | 35.6                         | 18.88             | 0.35                   | 51          | mamT      | MamT protein                                                                                                                |
| V6F5M3_9PROT | 9               | 40.6                         | 15.09             | 0.11                   | 20          | mamW      | Magnetosome protein MamW                                                                                                    |
| V6F2C2_9PROT | 2               | 7.1                          | 28.22             | 1.06                   | 10          | mamX      | Magnetosome protein MamX                                                                                                    |
| V6F7D9_9PROT | 7               | 23.4                         | 38.41             | 0.00                   | 9           | mmeA      | Magnetosome membrane associated protein MmeA                                                                                |
| V6F6Z3_9PROT | 14              | 80.7                         | 16.36             | 0.07                   | 31          | mms16     | Magnetic particle membrane specific GTPase P16                                                                              |
| V6F5K9_9PROT | 18              | 79.9                         | 14.83             | 12.37                  | 1404        | mms6      | Magnetosome protein mms6                                                                                                    |
| V6F244_9PROT | 17              | 66.4                         | 18.72             | 6.65                   | 80          | mms5      | Magnetosome protein Mms5                                                                                                    |
