# Supplementary material for: Bacterial Magnetosomes Release Iron Ions and Induce Regulation of Iron Homeostasis in Endothelial Cells
Source: MDPI journal article supplement (doi:10.3390/nano12223995), 2022-11-13
Supplement: s1 [file s1]

Table S6. The ratios of 158 differential expressed proteins identified by LC-MS/MS from MAG-treated ECs at 4 time point.

| 1 d log(2)Avg.<br>(M/C) | 4 d log(2)Avg.<br>(M/C) | 7 d log(2)Avg.<br>(M/C) | 10 d log(2)Avg.<br>(M/C) | Gene<br>name | Protein Description                                                 |
|-------------------------|-------------------------|-------------------------|--------------------------|--------------|---------------------------------------------------------------------|
| 0.347                   | 0.186                   | 0.057                   |                          | ABHD4        | Protein ABHD4                                                       |
| 0.269                   |                         |                         |                          | ANTXR2       | Anthrax toxin receptor 2                                            |
| 0.431                   | 0.313                   | -0.073                  | -0.108                   | AP1B1        | Isoform C of AP-1 complex subunit beta-1                            |
| 0.329                   |                         |                         | 0.098                    | AP4M1        | AP-4 complex subunit mu-1                                           |
|                         | 0.350                   | 0.410                   |                          | APOC1        | Apolipoprotein C-I                                                  |
| 0.343                   |                         |                         |                          | AREL1        | Apoptosis-resistant E3 ubiquitin protein ligase 1                   |
| -0.023                  | 0.299                   | -0.252                  | 0.074                    | ATRAID       | Isoform 3 of All-trans retinoic acid-induced differentiation factor |
| 1.175                   | 1.002                   | 1.500                   |                          | BAZ2B        | Bromodomain adjacent to zinc finger domain protein 2B (Fragment)    |
| -0.272                  | -0.063                  | 0.239                   |                          | BCL2L12      | Bcl-2-like protein 12                                               |
| 0.005                   | -0.029                  | 0.090                   | 0.293                    | C12orf43     | Chromosome 12 open reading frame 43, isoform CRA_a                  |
| -0.177                  | -0.024                  | 0.281                   | 0.046                    | C8orf76      | Uncharacterized protein C8orf76                                     |
|                         | -0.014                  | -0.288                  | 0.182                    | C9orf72      | Guanine nucleotide exchange C9orf72                                 |
| 0.604                   | -0.200                  | -0.580                  | -1.389                   | CANX         | Calnexin (Fragment)                                                 |
| 0.065                   | 0.305                   | 0.132                   | 0.043                    | CCL20        | C-C motif chemokine 20                                              |
|                         | 0.329                   | -0.085                  | 0.038                    | CD40         | Tumor necrosis factor receptor superfamily member 5                 |
| -0.112                  | 0.131                   | 0.213                   | 0.301                    | CD63         | CD63 antigen                                                        |
| 0.103                   | 0.269                   |                         |                          | CEBPD        | CCAAT/enhancer-binding protein delta                                |
| -0.265                  | 0.229                   | 0.305                   |                          | CEP78        | Isoform 2 of Centrosomal protein of 78 kDa                          |
| 0.244                   | -0.019                  | -0.529                  |                          | CFAP97       | Cilia- and flagella-associated protein 97                           |
| -0.014                  | 0.035                   | 0.167                   | 0.273                    | CLCN5        | Isoform 2 of H(+)/Cl(-) exchange transporter 5                      |
|                         |                         | -0.302                  | 0.064                    | CLEC4E       | C-type lectin domain family 4 member E                              |
| 0.130                   | 0.376                   | -0.183                  | 0.066                    | CNBP         | Cellular nucleic acid-binding protein                               |
| -0.321                  |                         |                         |                          | CNTRL        | Centriolin                                                          |
| -0.057                  | 0.247                   | 0.138                   | 0.387                    | CPQ          | Carboxypeptidase Q                                                  |
| 0.112                   | -0.079                  | -0.220                  | -0.545                   | DBF4B        | Protein DBF4 homolog B                                              |
| 0.009                   | 0.120                   | 0.217                   | 0.286                    | DNASE2       | Deoxyribonuclease-2-alpha                                           |
| -0.020                  | -0.116                  | 0.050                   | 0.281                    | DNM1L        | Isoform 4 of Dynamin-1-like protein                                 |
| 0.144                   | 0.122                   | 0.188                   | 0.290                    | DPYD         | Dihydropyrimidine dehydrogenase [NADP(+)]                           |

| 1 d log(2)Avg.<br>(M/C) | 4 d log(2)Avg.<br>(M/C) | 7 d log(2)Avg.<br>(M/C) | 10 d log(2)Avg.<br>(M/C) | Gene<br>name | Protein Description                                                |
|-------------------------|-------------------------|-------------------------|--------------------------|--------------|--------------------------------------------------------------------|
|                         | 0.412                   | 0.077                   | 0.045                    | EIF1B        | Eukaryotic translation initiation factor 1b                        |
| 0.305                   | -0.207                  |                         |                          | ELF2         | ETS-related transcription factor Elf-2                             |
| -0.185                  | -0.005                  | 0.153                   | 0.296                    | EMP3         | Epithelial membrane protein 3                                      |
| 0.319                   | -0.129                  | -0.001                  | -0.079                   | ERBB3        | Receptor tyrosine-protein kinase erbB-3                            |
| 0.135                   | 0.313                   |                         |                          | FAM161A      | Isoform 3 of Protein FAM161A                                       |
| -0.299                  | -0.068                  | 0.042                   |                          | FAM173B      | Protein FAM173B                                                    |
| -0.136                  | -0.019                  | 0.194                   | 0.267                    | FBRSL1       | Fibrosin-1-like protein                                            |
| 0.271                   |                         | 0.069                   | 0.099                    | FBXO28       | F-box only protein 28                                              |
| 0.081                   | 0.141                   | 0.285                   | 0.024                    | FEZ1         | Fasciculation and elongation protein zeta-1                        |
| 0.046                   | -0.274                  | 0.044                   | -0.060                   | FKRP         | Fukutin-related protein                                            |
| -0.085                  | 0.147                   | 0.146                   | 0.496                    | FOXH1        | Forkhead box protein H1                                            |
| 1.241                   | 1.591                   | 1.581                   | 1.410                    | FTH1         | Ferritin heavy chain                                               |
| 1.212                   | 1.553                   | 1.516                   | 1.349                    | FTL          | Ferritin light chain                                               |
| -0.151                  | -0.293                  | -0.020                  | 0.054                    | GALNT1       | Polypeptide N-acetylgalactosaminyltransferase 1                    |
| -0.053                  | -0.295                  | -0.216                  | -0.189                   | GBA          | Glucosylceramidase                                                 |
| 0.192                   | 0.301                   | 0.280                   | 0.192                    | GLT8D1       | Glycosyltransferase 8 domain-containing protein 1                  |
| 0.088                   | 0.438                   | -0.079                  | -0.061                   | H3F3A        | Histone H3.3                                                       |
| 0.429                   | 0.012                   | -0.275                  | -0.348                   | HIGD1A       | Isoform 2 of HIG1 domain family member 1A, mitochondrial           |
| 0.137                   | 0.022                   | -0.283                  | -0.152                   | HIGD2A       | HIG1 domain family member 2A, mitochondrial                        |
| 0.321                   | 0.476                   | 0.013                   | -0.169                   | HIST2H3A     | Histone H3.2                                                       |
| -0.036                  | -0.230                  | -0.444                  | -0.192                   | HMGA1        | Isoform HMG-Y of High mobility group protein HMG-I/HMG-Y           |
| -0.236                  | -0.372                  | -0.864                  | -0.277                   | HMGN2        | Non-histone chromosomal protein HMG-17                             |
| -0.149                  | -0.479                  | -0.831                  | -0.340                   | HMGN4        | High mobility group nucleosome-binding domain-containing protein 4 |
| 0.070                   | 0.149                   | 0.198                   | 0.358                    | HPSE         | Heparanase                                                         |
| -0.121                  | -0.288                  | -0.462                  | 0.265                    | HRNR         | Hornerin                                                           |
| -0.112                  | 0.026                   | 0.134                   | 0.294                    | HSPA8        | Heat shock cognate 71 kDa protein (Fragment)                       |
|                         | 0.324                   | -0.134                  |                          | ING2         | Inhibitor of growth protein 2                                      |
| -0.352                  | -0.279                  | 0.211                   | -0.070                   | IREB2        | Iron-responsive element-binding protein 2                          |
|                         |                         |                         | 0.324                    | ITGB8        | Integrin beta-8                                                    |

| 1 d log(2)Avg.<br>(M/C) | 4 d log(2)Avg.<br>(M/C) | 7 d log(2)Avg.<br>(M/C) | 10 d log(2)Avg.<br>(M/C) | Gene<br>name | Protein Description                                                        |
|-------------------------|-------------------------|-------------------------|--------------------------|--------------|----------------------------------------------------------------------------|
| -0.012                  | -0.041                  | -0.633                  | -0.070                   | KIF15        | Kinesin-like protein KIF15                                                 |
| 0.349                   | -0.041                  | -0.012                  | 0.080                    | KLHL36       | Kelch-like protein 36                                                      |
| 0.162                   | 0.355                   | 0.008                   | 0.065                    | KLHL7        | Kelch-like protein 7                                                       |
|                         |                         |                         | 0.589                    | LAPTM4A      | Lysosomal-associated transmembrane protein 4A                              |
| 0.047                   | -0.282                  | -0.360                  | -0.595                   | LBP          | Lipopolysaccharide-binding protein                                         |
| -0.069                  | 0.140                   | 0.379                   | 0.584                    | LGMN         | Legumain                                                                   |
|                         | -0.102                  | 0.358                   | 0.204                    | LGR5         | Leucine-rich repeat-containing G-protein coupled receptor 5                |
| 0.035                   | 0.220                   | 0.545                   | 0.557                    | LIPA         | Lysosomal acid lipase/cholesteryl ester hydrolase                          |
| 0.054                   | 0.164                   | 0.414                   | 0.222                    | LLPH         | Protein LLP homolog                                                        |
| 0.332                   | -0.023                  |                         | 0.088                    | LOC401307    | HCG19535                                                                   |
|                         |                         | 0.304                   | 0.309                    | LRP8         | Low-density lipoprotein receptor-related protein 8                         |
|                         |                         | -0.651                  |                          | LTF          | Lactotransferrin                                                           |
|                         |                         | 0.057                   | 0.370                    | MAP4         | Microtubule-associated protein 4                                           |
| 0.062                   | 0.034                   | -0.101                  | -0.390                   | MAX          | Protein max                                                                |
| 0.448                   | -0.477                  | -0.064                  |                          | MBNL1        | Isoform 5 of Muscleblind-like protein 1                                    |
| 0.253                   | -0.278                  |                         |                          | MBTPS1       | Membrane-bound transcription factor site-1 protease                        |
|                         |                         | -0.304                  |                          | MCM9         | DNA helicase MCM9                                                          |
| 0.277                   | -0.041                  | -0.059                  | -0.047                   | MICALL2      | MICAL-like protein 2                                                       |
| 0.319                   | 0.432                   | 0.046                   | 0.042                    | MINOS1       | MICOS complex subunit MIC10                                                |
| -0.111                  | -0.369                  |                         | 0.005                    | MPP1         | 55 kDa erythrocyte membrane protein                                        |
| 0.017                   | -0.076                  | 0.041                   | 0.320                    | MYH14        | Isoform 2 of Myosin-14                                                     |
|                         |                         |                         | -0.498                   | MYL6         | Myosin light polypeptide 6                                                 |
|                         | 0.165                   | 0.314                   | -0.023                   | MZT2A        | Mitotic-spindle organizing protein 2A                                      |
| -0.029                  | 0.099                   | 0.210                   | 0.359                    | NACA2        | Nascent polypeptide-associated complex subunit alpha-2                     |
| -0.020                  | 0.006                   | 0.351                   | 0.160                    | NATD1        | Protein NATD1                                                              |
| 0.156                   | -0.145                  | -0.388                  | 0.185                    | NDUFB2       | NADH dehydrogenase [ubiquinone] 1 beta subcomplex subunit 2, mitochondrial |
| 0.178                   | -0.099                  |                         | 0.385                    | NFIX         | Nuclear factor 1 X-type                                                    |
| -0.388                  |                         | 0.100                   | 0.234                    | NOTCH1       | Neurogenic locus notch homolog protein 1                                   |
|                         |                         |                         | 0.288                    | NRXN1        | Isoform 3a of Neurexin-1                                                   |

| 1 d log(2)Avg.<br>(M/C) | 4 d log(2)Avg.<br>(M/C) | 7 d log(2)Avg.<br>(M/C) | 10 d log(2)Avg.<br>(M/C) | Gene<br>name | Protein Description                                             |
|-------------------------|-------------------------|-------------------------|--------------------------|--------------|-----------------------------------------------------------------|
| 0.301                   |                         |                         |                          | NSFL1C       | Isoform 2 of NSFL1 cofactor p47                                 |
|                         | -0.240                  | -0.450                  |                          | NUPR1        | Isoform 2 of Nuclear protein 1                                  |
| 1.508                   | 2.295                   | 2.324                   | 2.209                    | ODAPH        | Isoform 2 of odontogenesis associated phosphoprotein            |
| 0.002                   | -0.021                  | 0.370                   |                          | OTUB2        | Ubiquitin thioesterase OTUB2                                    |
| -0.006                  | 0.309                   | 0.063                   | 0.087                    | PCTP         | Phosphatidylcholine transfer protein                            |
| -0.021                  | 0.090                   | 0.094                   | -0.262                   | PKN3         | Serine/threonine-protein kinase N3                              |
| 1.375                   | -0.078                  | 0.148                   | 0.173                    | PLK1         | Serine/threonine-protein kinase PLK1                            |
| -0.051                  | 0.435                   | -0.120                  | 0.084                    | PLP2         | Proteolipid protein 2                                           |
| -0.108                  | -0.079                  | 0.308                   | 0.388                    | PLPP1        | Phospholipid phosphatase 1                                      |
| 0.458                   | 0.236                   |                         | 0.063                    | PLPP2        | Isoform 2 of Phospholipid phosphatase 2                         |
| 0.206                   | 0.333                   | 0.246                   | 0.060                    | PNMA1        | Paraneoplastic antigen Ma1                                      |
|                         | 0.098                   | 0.425                   | -0.003                   | PODN         | Isoform 3 of Podocan                                            |
| -0.163                  | -0.078                  | 0.009                   | 0.362                    | PPP1R16A     | Protein phosphatase 1 regulatory subunit 16A                    |
| 0.031                   | 0.121                   | 0.259                   | 0.300                    | PPT1         | Palmitoyl-protein thioesterase 1                                |
| 0.056                   | 0.025                   | -0.035                  | 0.288                    | PPTC7        | Protein phosphatase PTC7 homolog                                |
| -0.101                  |                         | 0.469                   |                          | PRELID3B     | PRELI domain containing protein 3B                              |
| 0.303                   |                         | 0.003                   |                          | PRG4         | Proteoglycan 4                                                  |
| -0.240                  | 0.090                   | 0.090                   | 0.265                    | PSAP         | Prosaposin                                                      |
| 0.026                   | 0.051                   | 0.053                   | 0.369                    | PTTG1IP      | Pituitary tumor-transforming gene 1 protein-interacting protein |
|                         | 0.143                   | -0.546                  |                          | PYGO1        | Pygopus homolog 1                                               |
| -0.020                  | -0.395                  | -0.051                  | 0.004                    | RABIF        | Guanine nucleotide exchange factor MSS4                         |
| -0.095                  | -0.139                  | -0.414                  | -0.345                   | RBBP5        | Isoform 2 of Retinoblastoma-binding protein 5                   |
| 0.379                   | 0.010                   | 0.361                   |                          | RBM26        | Isoform 2 of RNA-binding protein 26                             |
| 0.475                   | 0.320                   | -0.096                  | -0.078                   | RBX1         | E3 ubiquitin-protein ligase RBX1                                |
| -0.044                  | 0.129                   | 0.147                   | 0.310                    | RNF13        | E3 ubiquitin-protein ligase RNF13                               |
|                         |                         |                         | 0.706                    | RNH1         | Ribonuclease inhibitor (Fragment)                               |
| 0.212                   | 0.348                   | -0.108                  | -0.177                   | RPS29        | Isoform 2 of 40S ribosomal protein S29                          |
| 0.167                   | 0.327                   | 0.298                   | 0.185                    | SAA1         | Serum amyloid A-1 protein                                       |
| 0.035                   | 0.164                   | 0.252                   | 0.301                    | SCARB1       | Scavenger receptor class B member 1                             |
| 0.214                   | 0.325                   | 0.070                   | 0.113                    | SDF4         | 45 kDa calcium-binding protein                                  |

| 1 d log(2)Avg.<br>(M/C) | 4 d log(2)Avg.<br>(M/C) | 7 d log(2)Avg.<br>(M/C) | 10 d log(2)Avg.<br>(M/C) | Gene<br>name | Protein Description                                             |
|-------------------------|-------------------------|-------------------------|--------------------------|--------------|-----------------------------------------------------------------|
| -0.268                  | -0.112                  | -0.275                  | 0.061                    | SDHAF2       | Succinate dehydrogenase assembly factor 2, mitochondrial        |
| 2.716                   | 1.883                   |                         | 1.927                    | SH3TC2       | SH3 domain and tetratricopeptide repeat-containing protein 2    |
| 0.110                   | 0.006                   | 0.324                   | 0.074                    | SHKBP1       | SH3KBP1-binding protein 1                                       |
| 0.280                   | -0.006                  | 0.206                   | -0.116                   | SIX4         | Homeobox protein SIX4                                           |
| -0.050                  | -0.388                  | -0.037                  | -0.096                   | SLC11A2      | Isoform 4 of Natural resistance-associated macrophage protein 2 |
| 0.416                   |                         | 0.109                   |                          | SLC35B4      | UDP-xylose and UDP-N-acetylglucosamine transporter              |
|                         | -0.238                  | -0.297                  |                          | SLC35D1      | UDP-glucuronic acid/UDP-N-acetylgalactosamine transporter       |
|                         | 0.095                   | 0.120                   | 0.350                    | SLC36A1      | Proton-coupled amino acid transporter 1                         |
| -0.052                  | -0.005                  | 0.040                   | 0.319                    | SLC39A1      | Zinc transporter ZIP1                                           |
| -0.020                  | -0.288                  | 0.021                   | 0.070                    | SOGA3        | Protein SOGA3                                                   |
| 0.259                   | -0.182                  | 0.607                   |                          | SPA17        | Sperm surface protein Sp17                                      |
|                         | 0.010                   | 0.124                   | 0.317                    | SPATA2       | Spermatogenesis-associated protein 2                            |
| 0.238                   | 0.619                   | 0.065                   | 0.144                    | SRI          | Sorcin                                                          |
| -0.045                  | 0.604                   | -0.053                  |                          | SSNA1        | Sjogren syndrome nuclear autoantigen 1                          |
| 0.041                   | 0.706                   | 0.040                   | -0.121                   | SUGT1        | Isoform 2 of Protein SGT1 homolog                               |
| 0.382                   | 0.132                   | -0.166                  | -0.262                   | SUPT4H1      | Transcription elongation factor SPT4                            |
|                         |                         | 0.330                   | -0.097                   | TAPBPL       | Isoform zeta of Tapasin-related protein                         |
| 0.055                   | 0.094                   |                         | 0.362                    | TBC1D16      | TBC1 domain family member 16                                    |
| 0.103                   | 0.394                   |                         | -0.032                   | TEAD3        | Transcriptional enhancer factor TEF-5                           |
| -0.326                  | -0.769                  | -0.580                  | -0.590                   | TFRC         | Transferrin receptor protein 1                                  |
| 0.039                   | -0.096                  | -0.001                  | -0.346                   | TGFBI        | Transforming growth factor-beta-induced protein ig-h3           |
| 0.012                   | 0.229                   | 0.345                   |                          | TM7SF3       | Transmembrane 7 superfamily member 3                            |
| -0.154                  | -0.046                  | 0.264                   | 0.092                    | TMEM267      | Transmembrane protein 267                                       |
| 0.534                   | 0.042                   | 0.132                   | 0.342                    | TPH1         | Isoform 2 of Tryptophan 5-hydroxylase 1                         |
| 0.059                   | -0.053                  | -0.418                  | 0.133                    | TRAFD1       | TRAF-type zinc finger domain-containing protein 1               |
| -0.303                  | -0.007                  | -0.001                  | 0.083                    | TSEN15       | tRNA-splicing endonuclease subunit Sen15                        |
| -0.032                  | 0.299                   | 0.248                   | 0.424                    | TSPAN3       | Tetraspanin-3                                                   |
|                         |                         |                         | 0.285                    | TSPAN31      | Tetraspanin-31                                                  |
| 0.012                   | 0.077                   | 0.286                   |                          | TUFT1        | Tuftelin                                                        |
| 0.249                   | 0.378                   | -0.195                  | -0.064                   | UBA52        | Ubiquitin-60S ribosomal protein L40                             |

| 1 d log(2)Avg.<br>(M/C) | 4 d log(2)Avg.<br>(M/C) | 7 d log(2)Avg.<br>(M/C) | 10 d log(2)Avg.<br>(M/C) | Gene<br>name | Protein Description                                   |
|-------------------------|-------------------------|-------------------------|--------------------------|--------------|-------------------------------------------------------|
|                         | -0.297                  | -0.378                  | 0.395                    | UPF3A        | Regulator of nonsense transcripts 3A                  |
| 0.320                   | 0.394                   | -0.166                  | 0.073                    | UQCRH        | Cytochrome b-c1 complex subunit 6, mitochondrial      |
| 0.012                   | 0.006                   | 0.135                   | 0.276                    | USP13        | Ubiquitin carboxyl-terminal hydrolase 13              |
| 0.011                   |                         | -0.373                  | 0.439                    | VSIG10       | V-set and immunoglobulin domain-containing protein 10 |
| 0.004                   | 0.279                   | -0.024                  | 0.267                    | WASH6P       | WAS protein family homolog 6                          |
| -0.043                  | -0.096                  | 0.272                   | 0.115                    | WDFY2        | WD repeat and FYVE domain-containing protein 2        |
| 0.066                   | -0.092                  |                         | 0.321                    | XPR1         | Xenotropic and polytropic retrovirus receptor 1       |
|                         |                         |                         | 0.432                    | ZC3H10       | Zinc finger CCCH domain-containing protein 10         |
| 0.334                   |                         |                         |                          | ZC3H3        | Zinc finger CCCH domain-containing protein 3          |
| 0.013                   |                         | -0.647                  |                          | ZNF28        | Zinc finger protein 28                                |
|                         | -0.327                  |                         |                          | ZNF419       | Isoform 5 of Zinc finger protein 419                  |
| 0.298                   | 0.247                   | -0.114                  | -0.072                   | ZNF706       | Zinc finger protein 706                               |

C, control cell; M, MAG-treated cell.
