# Supplementary material for: Bacterial Magnetosomes Release Iron Ions and Induce Regulation of Iron Homeostasis in Endothelial Cells
Source: MDPI journal article supplement (doi:10.3390/nano12223995), 2022-11-13
Supplement: s1 [file s1]

Table S3. Corona protein amount on the nanoparticles measured by BCA assay.

|                                               | MAGs + plasma #    | IONPs + plasma    |
|-----------------------------------------------|--------------------|-------------------|
| Protein/Fe<br>( $\mu\text{g}/\mu\text{g}$ ) * | $0.018 \pm 0.0087$ | $0.098 \pm 0.013$ |

\* Protein amount is normalized by Fe amount in each sample, data are shown in mean  $\pm$  SD of three independent experiments.  $\mu\text{g}/\mu\text{g}$ , protein amount per microgramme Fe.

# The corona amount on MAGs was calculated by deducting the protein amount on MAGs from total protein amount of MAGs after plasma incubation.
