# Supplementary material for: Bacterial Magnetosomes Release Iron Ions and Induce Regulation of Iron Homeostasis in Endothelial Cells
Source: MDPI journal article supplement (doi:10.3390/nano12223995), 2022-11-13
Supplement: s1 [file s1]

Table S8. Function and pathway enrichment of the differential expressed proteins from 4 time points of ECs under MAGs treatment.

| ID            | Database                         | Term                                                     | P Value* | % Associated Genes | Nr. Genes | Associated Genes Found                                                                                                |
|---------------|----------------------------------|----------------------------------------------------------|----------|--------------------|-----------|-----------------------------------------------------------------------------------------------------------------------|
| KEGG:04142    | KEGG                             | Lysosome                                                 | 0.00     | 8.59               | 11        | [AP1B1, AP4M1, CD63, DNASE2, GBA, LAPT4A, LGMN, LIPA, PPT1, PSAP, SLC11A2]                                            |
| WP:2007       | WikiPathways                     | Iron metabolism in placenta                              | 0.00     | 33.33              | 4         | [FTH1, IREB2, SLC11A2, TFRC]                                                                                          |
| R-HSA:199992  | REACTOME_Pathways                | trans-Golgi Network Vesicle Budding                      | 0.00     | 9.72               | 7         | [AP1B1, AP4M1, DNASE2, FTH1, FTL, HSPA8, TFRC]                                                                        |
| R-HSA:917937  | REACTOME_Pathways                | Iron uptake and transport                                | 0.00     | 10.34              | 6         | [FTH1, FTL, IREB2, SLC11A2, TFRC, LTF, UBA52]                                                                         |
| R-HSA:432722  | REACTOME_Pathways                | Golgi Associated Vesicle Biogenesis                      | 0.01     | 8.93               | 5         | [AP1B1, FTH1, FTL, HSPA8, TFRC]                                                                                       |
| R-HSA:432720  | REACTOME_Pathways                | Lysosome Vesicle Biogenesis                              | 0.01     | 11.43              | 4         | [AP1B1, AP4M1, DNASE2, HSPA8]                                                                                         |
| GO:0106235    | GO_MolecularFunction-EBI-UniProt | ceramide-1-phosphate phosphatase activity                | 0.01     | 66.67              | 2         | [PLPP1, PLPP2]                                                                                                        |
| R-HSA:2173782 | REACTOME_Pathways                | Binding and Uptake of Ligands by Scavenger Receptors     | 0.01     | 9.52               | 4         | [FTH1, FTL, SAA1, SCARB1]                                                                                             |
| KEGG:04216    | KEGG                             | Ferroptosis                                              | 0.01     | 9.76               | 4         | [FTH1, FTL, SLC11A2, TFRC]                                                                                            |
| WP:4313       | WikiPathways                     | Ferroptosis                                              | 0.01     | 10.00              | 4         | [FTH1, FTL, SLC11A2, TFRC]                                                                                            |
| R-HSA:382551  | REACTOME_Pathways                | Transport of small molecules                             | 0.02     | 2.20               | 16        | [APOC1, CLCN5, FTH1, FTL, IREB2, LIPA, MBTPS1, SCARB1, SLC11A2, SLC35B4, SLC35D1, SLC36A1, SLC39A1, SRI, TFRC, UBA52] |
| R-HSA:977225  | REACTOME_Pathways                | Amyloid fiber formation                                  | 0.02     | 5.50               | 6         | [H3-3A, H3C15, LTF, SAA1, TGFB1, UBA52]                                                                               |
| R-HSA:380270  | REACTOME_Pathways                | Recruitment of mitotic centrosome proteins and complexes | 0.02     | 6.10               | 5         | [CEP78, CNTRL, MZT2A, PLK1, SSNA1]                                                                                    |
| R-HSA:380287  | REACTOME_Pathways                | Centrosome maturation                                    | 0.02     | 6.10               | 5         | [CEP78, CNTRL, MZT2A, PLK1, SSNA1]                                                                                    |
| R-HSA:2644605 | REACTOME_Pathways                | FBXW7 Mutants and NOTCH1 in Cancer                       | 0.02     | 40.00              | 2         | [NOTCH1, RBX1]                                                                                                        |
| R-HSA:2644607 | REACTOME_Pathways                | Loss of Function of FBXW7 in Cancer and NOTCH1 Signaling | 0.02     | 40.00              | 2         | [NOTCH1, RBX1]                                                                                                        |
| R-HSA:2565942 | REACTOME_Pathways                | Regulation of PLK1 Activity at G2/M Transition           | 0.02     | 5.68               | 5         | [CEP78, CNTRL, PLK1, SSNA1, UBA52]                                                                                    |
| GO:0042392    | GO_MolecularFunction-EBI-UniProt | sphingosine-1-phosphate phosphatase activity             | 0.03     | 40.00              | 2         | [PLPP1, PLPP2]                                                                                                        |
| R-HSA:3000471 | REACTOME_Pathways                | Scavenging by Class B Receptors                          | 0.03     | 33.33              | 2         | [SAA1, SCARB1]                                                                                                        |
| R-HSA:5625740 | REACTOME_Pathways                | RHO GTPases activate PKNs                                | 0.03     | 5.26               | 5         | [H3-3A, H3C15, MYH14, MYL6, PKN3]                                                                                     |

| ID            | Database                         | Term                                                                                  | P Value* | % Associated Genes | Nr. Genes | Associated Genes Found                                                                      |
|---------------|----------------------------------|---------------------------------------------------------------------------------------|----------|--------------------|-----------|---------------------------------------------------------------------------------------------|
| R-HSA:69275   | REACTOME_Pathways                | G2/M Transition                                                                       | 0.03     | 3.57               | 7         | [CEP78, CNTRL, MZT2A, PLK1, RBX1, SSNA1, UBA52]                                             |
| R-HSA:453274  | REACTOME_Pathways                | Mitotic G2-G2/M phases                                                                | 0.03     | 3.54               | 7         | [CEP78, CNTRL, MZT2A, PLK1, RBX1, SSNA1, UBA52]                                             |
| R-HSA:380320  | REACTOME_Pathways                | Recruitment of NuMA to mitotic centrosomes                                            | 0.03     | 5.32               | 5         | [CEP78, CNTRL, MZT2A, PLK1, SSNA1]                                                          |
| GO:0030021    | GO_MolecularFunction-EBI-UniProt | extracellular matrix structural constituent conferring compression resistance         | 0.03     | 12.00              | 3         | [PODN, PRG4, TUFT1]                                                                         |
| WP:2361       | WikiPathways                     | Gastric Cancer Network 1                                                              | 0.03     | 10.34              | 3         | [H3-3A, KIF15, NOTCH1]                                                                      |
| R-HSA:5653656 | REACTOME_Pathways                | Vesicle-mediated transport                                                            | 0.04     | 2.08               | 13        | [AP1B1, AP4M1, DNASE2, FTH1, FTL, GALNT1, HSPA8, KIF15, SAA1, SCARB1, TBC1D16, TFRC, UBA52] |
| R-HSA:174824  | REACTOME_Pathways                | Plasma lipoprotein assembly, remodeling, and clearance                                | 0.04     | 5.80               | 4         | [APOC1, LIPA, MBTPS1, SCARB1]                                                               |
| R-HSA:380259  | REACTOME_Pathways                | Loss of Nlp from mitotic centrosomes                                                  | 0.04     | 5.71               | 4         | [CEP78, CNTRL, PLK1, SSNA1]                                                                 |
| R-HSA:380284  | REACTOME_Pathways                | Loss of proteins required for interphase microtubule organization from the centrosome | 0.04     | 5.71               | 4         | [CEP78, CNTRL, PLK1, SSNA1]                                                                 |
| R-HSA:727802  | REACTOME_Pathways                | Transport of nucleotide sugars                                                        | 0.04     | 22.22              | 2         | [SLC35B4, SLC35D1]                                                                          |
| R-HSA:8964043 | REACTOME_Pathways                | Plasma lipoprotein clearance                                                          | 0.04     | 9.09               | 3         | [APOC1, LIPA, SCARB1]                                                                       |
| R-HSA:201681  | REACTOME_Pathways                | TCF dependent signaling in response to WNT                                            | 0.05     | 3.00               | 7         | [H3-3A, H3C15, LGR5, PYGO1, RBBP5, RBX1, UBA52]                                             |
| R-HSA:8854518 | REACTOME_Pathways                | AURKA Activation by TPX2                                                              | 0.05     | 5.48               | 4         | [CEP78, CNTRL, PLK1, SSNA1]                                                                 |

\* *p*-Value was corrected with Benjamini-Hochberg
